# Supplementary material for: Enantioselective functionalization of unactivated C(sp3)–H bonds through copper-catalyzed diyne cyclization by kinetic resolution
Source: PubMed Central journal article supplement (PMC10933314; doi:10.1038/s41467-024-46288-7), 2024-03-12
Supplement: 41467_2024_46288_MOESM1_ESM.pdf [file 41467_2024_46288_MOESM1_ESM.pdf]

## Supplementary Information

### **Enantioselective functionalization of unactivated C(sp<sup>3</sup>)-H bonds through copper-catalyzed diyne cyclization by kinetic resolution**

Yang-Bo Chen,<sup>1</sup> Li-Gao Liu,<sup>1</sup> Zhe-Qi Wang,<sup>1</sup> Rong Chang,<sup>1</sup> Xin Lu<sup>\*,1</sup> Bo Zhou<sup>1</sup> and Long-Wu Ye<sup>\*,1,2</sup>

<sup>1</sup>State Key Laboratory of Physical Chemistry of Solid Surfaces, Key Laboratory of Chemical Biology of Fujian Province, and College of Chemistry and Chemical Engineering, Xiamen University, Xiamen 361005, China.

<sup>2</sup>State Key Laboratory of Organometallic Chemistry, Shanghai Institute of Organic Chemistry, Chinese Academy of Sciences, Shanghai 200032, China.

\*Email: [longwuye@xmu.edu.cn](mailto:longwuye@xmu.edu.cn); [xinlu@xmu.edu.cn](mailto:xinlu@xmu.edu.cn)

| <b>Content</b>                                                          | <b>Page Number</b> |
|-------------------------------------------------------------------------|--------------------|
| <b>1. General Information</b>                                           | 2                  |
| <b>2. More Substrate Scope and Mechanism Studies</b>                    | 3                  |
| <b>3. Preparation of Starting Materials</b>                             | 9                  |
| <b>4. General Procedure for the Copper-Catalyzed Kinetic Resolution</b> | 46                 |
| <b>5. Synthetic Transformations</b>                                     | 101                |
| <b>6. Crystal Data</b>                                                  | 109                |
| <b>7. Computational Studies</b>                                         | 112                |
| <b>8. HPLC Chromatograms</b>                                            | 114                |
| <b>9. NMR Spectra</b>                                                   | 208                |
| <b>10. References</b>                                                   | 328                |

## 1. General Information

Ethyl acetate (ACS grade), hexanes (ACS grade), anhydrous *m*-xylene (ACS grade) and toluene (ACS grade) were obtained commercially and used without further purification. Methylene chloride, tetrahydrofuran and diethyl ether were purified according to standard methods unless otherwise noted. Commercially available reagents were used without further purification. Reactions were monitored by thin layer chromatography (TLC) using silicycle pre-coated silica gel plates. Flash column chromatography was performed over silica gel (300-400 mesh). Infrared spectra were recorded on a Nicolet iS50 FTIR Spectrometer as thin film and are reported in reciprocal centimeter ( $\text{cm}^{-1}$ ). Mass spectra were recorded with Agilent 6230 ESI-TOF mass spectrometer.

$^1\text{H}$  NMR spectra and  $^{13}\text{C}$  NMR spectra were recorded on a Bruker AV-400 spectrometer, a Bruker AV-500 spectrometer or a Bruker AV-600 spectrometer in chloroform- $\text{d}_3$ . For  $^1\text{H}$  NMR spectra, chemical shifts are reported in ppm with the internal TMS signal at 0.0 ppm as a standard. For  $^{13}\text{C}$  NMR spectra, chemical shifts are reported in ppm with the internal chloroform signal at 77.0 ppm as a standard. The data is being reported as (s = singlet, d = doublet, t = triplet, q = quartet, m = multiplet or unresolved, coupling constant(s) in Hz, integration).

Enantiomeric excesses (ee) were determined by an UltiMate 3000 chiral HPLC. The chiral columns used for the determination of enantiomeric excesses by chiral HPLC were Chiralpak columns (IA, IB, IC, IE, IF, IG, AD-H, AS-H, OD-H). The particle size is 5  $\mu\text{m}$  and dimensions is 4.6 mm I.D \* 250 mm L.

## 2. More Substrate Scope and Mechanism Studies

### 2.1 More Substrate Scope Studies

Our attempts to extend the reaction to the following diynes **1ad**, **1ae**, **1at–1aw** under the optimal reaction conditions were unsuccessful (Supplementary Figure 1).

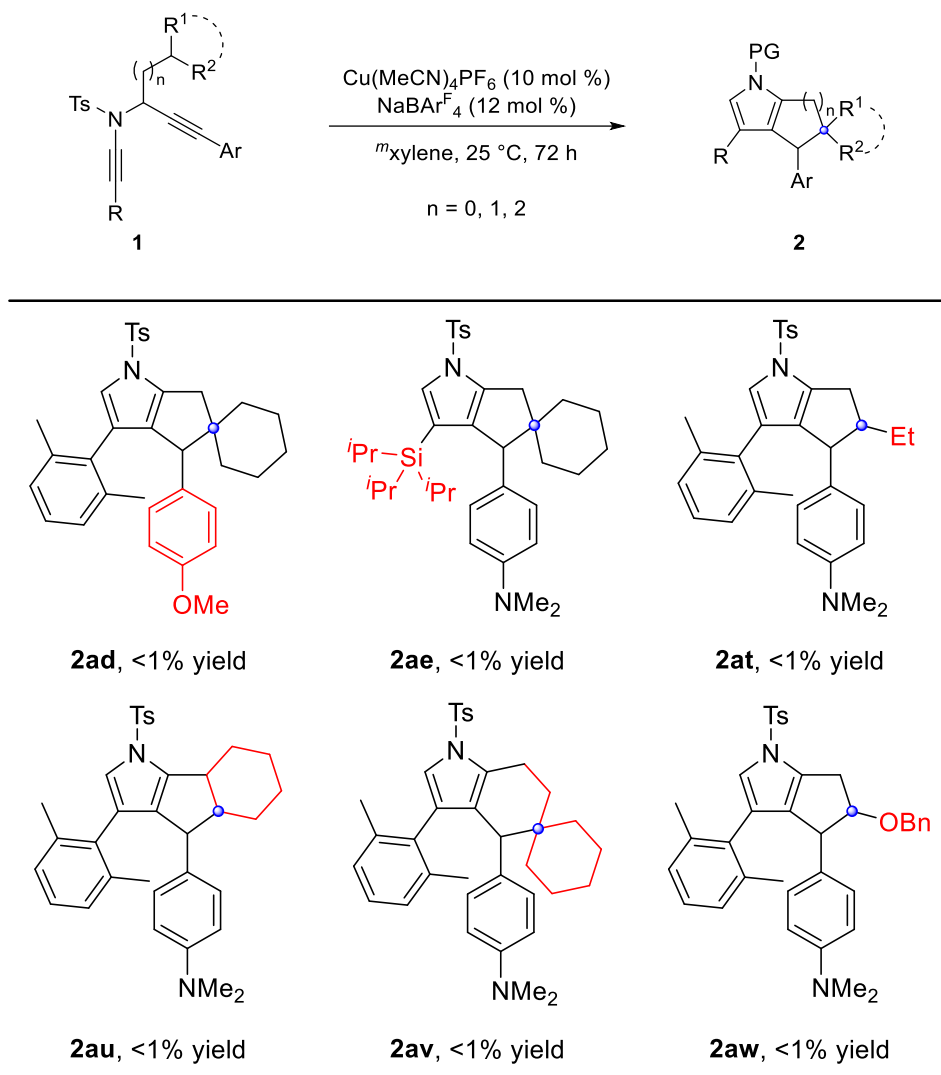

**Supplementary Figure 1.** The reaction of other diynes under the optimal conditions.

## 2.2 Mechanism Studies

### 2.2.1 The reaction of ( $\pm$ )-[D]\*-1a under the standard conditions

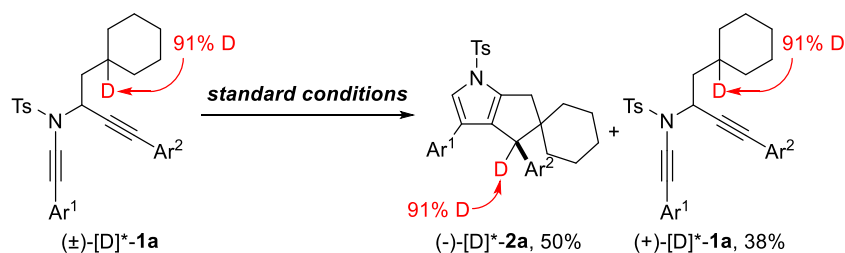

The reaction of ( $\pm$ )-[D]\*-1a under the standard reaction conditions resulted in (-)-[D]\*-2a in 50% yield and (+)-[D]\*-1a in 38% yield. The deuterium atom was completely retained in both product (-)-[D]\*-2a and recovered substrate (+)-[D]\*-1a (Supplementary Figure 2).

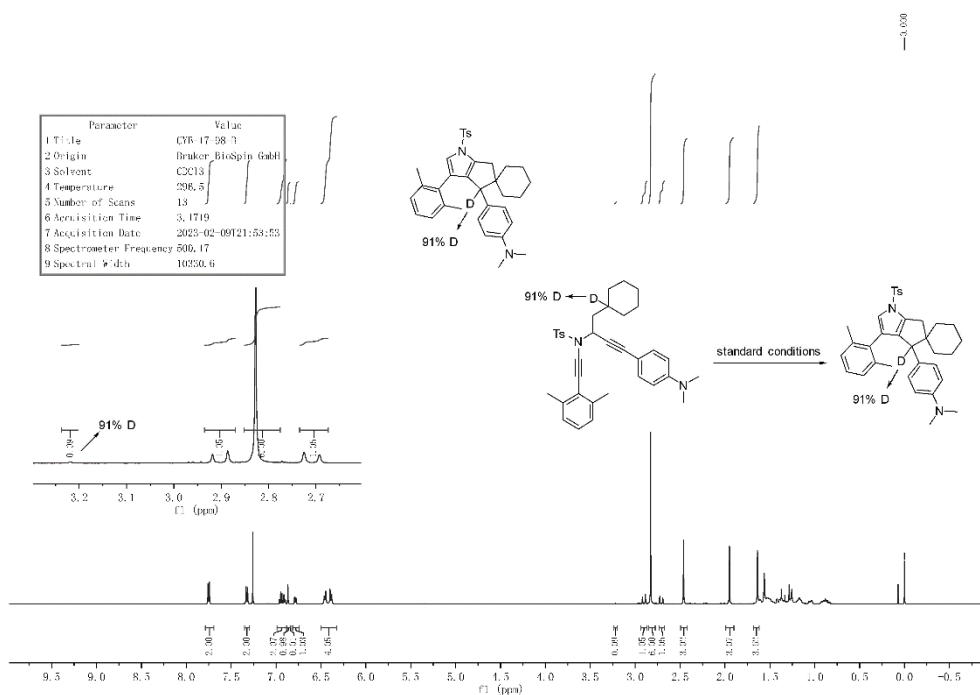

Supplementary Figure 2. <sup>1</sup>H NMR of compound (-)-[D]\*-2a



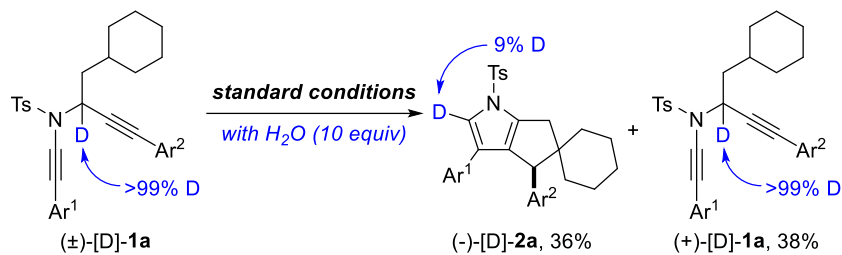

Meanwhile, the deuterium-labeled substrate  $(\pm)\text{-[D]-1a}$  was also subjected to the standard reaction conditions with 10 equiv of  $\text{H}_2\text{O}$  as additive, but only 9% deuterium was observed in the product (Supplementary Figure 4). These findings are in agreement with our previous work<sup>3</sup>.

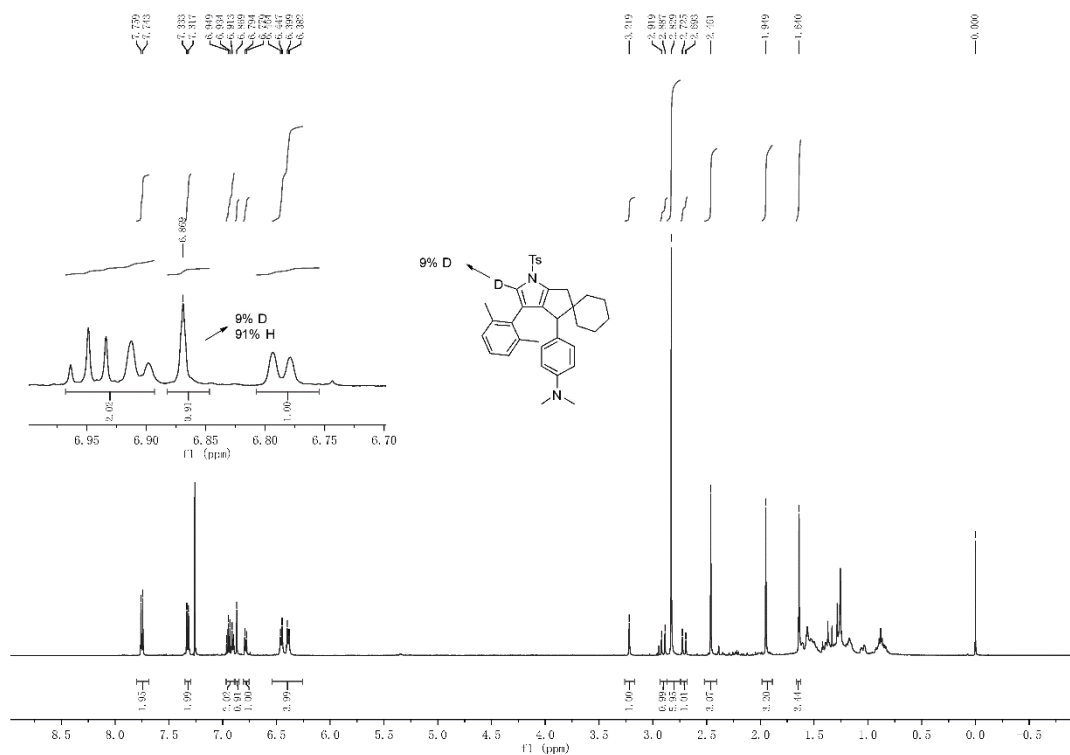

**Supplementary Figure 4.**  $^1\text{H NMR}$  of compound  $(-)\text{-[D]-2a}$

### 2.2.3 KIE Experiments

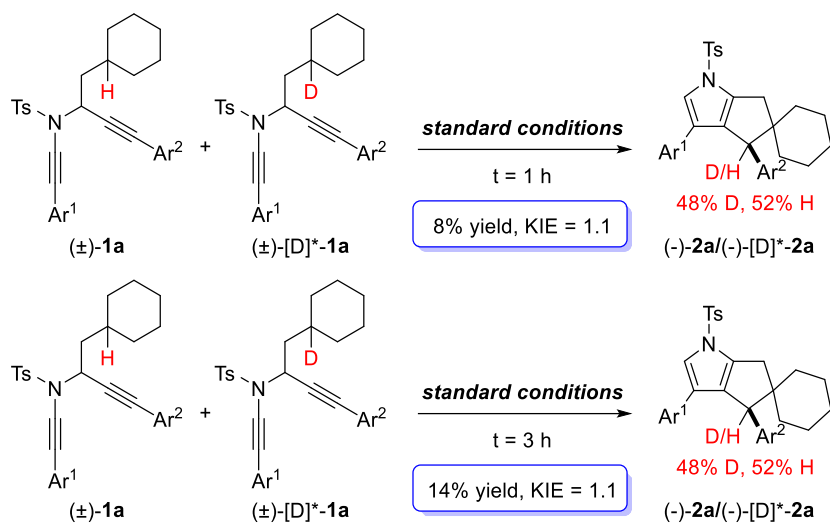

**Supplementary Figure 5. KIE Experiments**

The competitive reaction was performed with **(±)-1a** (24.9 mg, 0.045 mmol), **(±)-[D]\*-1a** (30.5 mg, 0.055 mmol, 91% D),  $\text{Cu}(\text{MeCN})_4\text{PF}_6$  (3.7 mg, 0.01 mmol), **L10** (8.7 mg, 0.012 mmol),  $\text{NaBAR}_4^{\text{F}}$  (10.6 mg, 0.012 mmol) and *m*-xylene (2 mL) following the general procedure. After corresponding reaction time, the reaction was analyzed by crude  $^1\text{H}$  NMR. The results (KIE = 1.1) suggest that the  $\text{C}(\text{sp}^3)\text{-H}$  bond cleavage is not involved in the rate-determining step (Supplementary Figure 6 and 7).

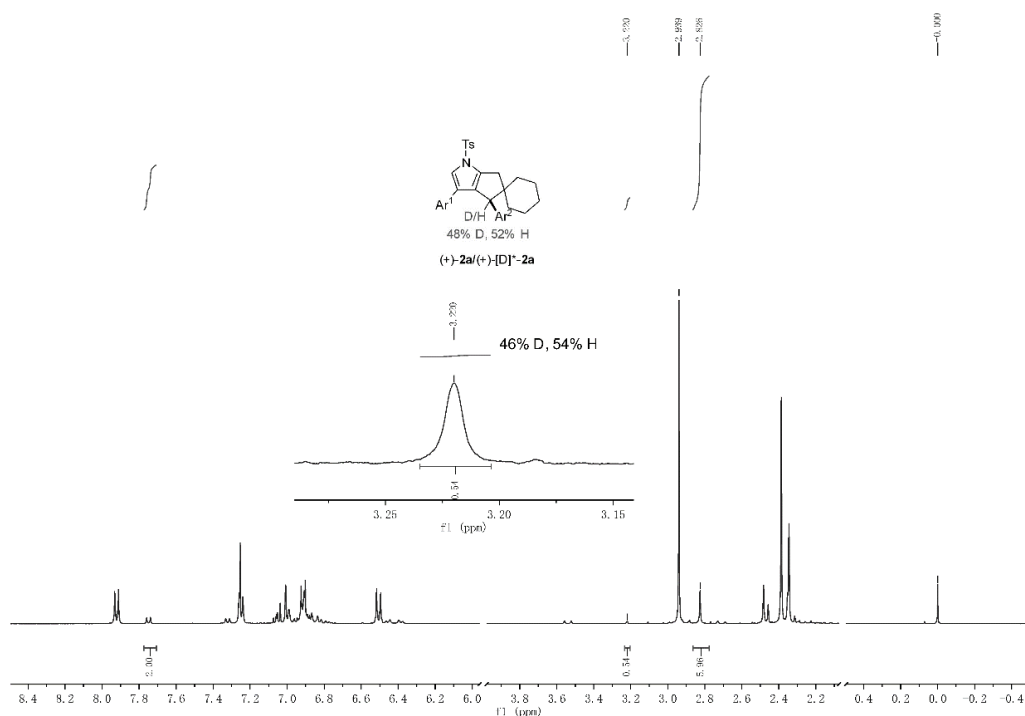

**Supplementary Figure 6. Crude  $^1\text{H}$  NMR for the competitive reaction after 1 h**

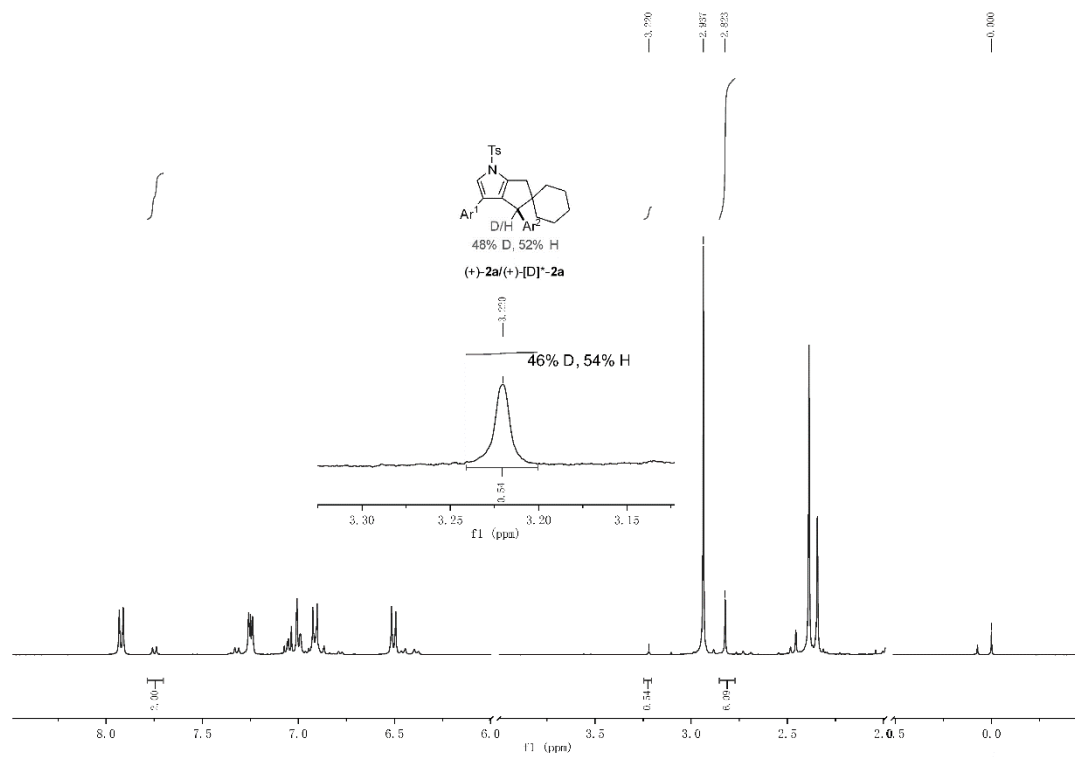

**Supplementary Figure 7.** Crude  $^1\text{H}$  NMR for the competitive reaction after 3 h



### 3. Preparation of Starting Materials

*N*-propargyl ynamides **1** were prepared according to the following procedure<sup>1-3</sup>.

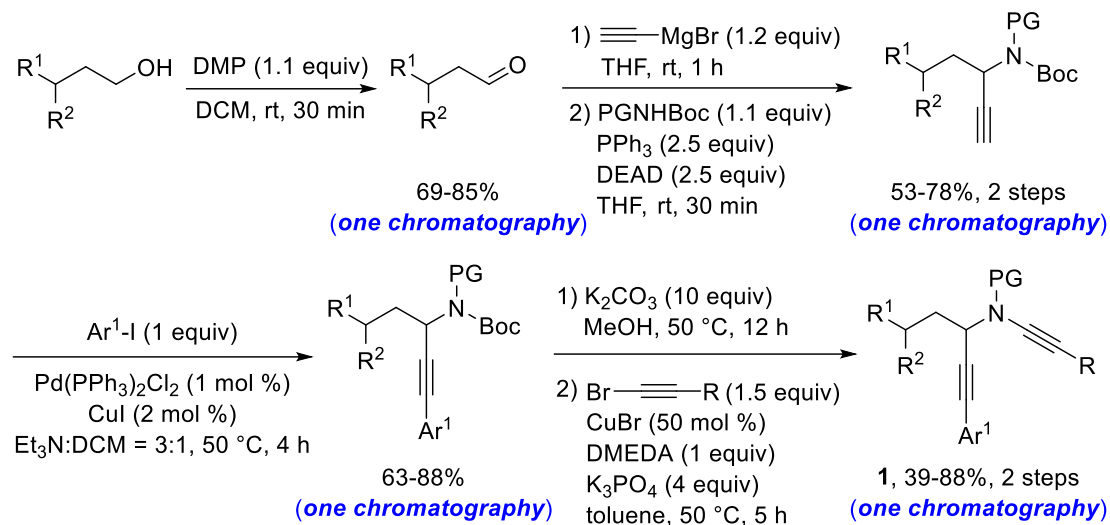

#### Supplementary Figure 8. General procedure for the synthesis of substrate **1**

To the solution of the substituted alcohol<sup>1</sup> (10 mmol) in DCM (50 mL) was added Dess-Martin Periodinane (11 mmol, 4.66 g), and the reaction was stirred at room temperature for 30 min. The progress of the reaction was monitored by TLC. Upon completion, the reaction was quenched with aqueous NaHCO<sub>3</sub> and extracted with DCM (3 x 50 mL). The combined organic layers was dried over anhydrous MgSO<sub>4</sub> and concentrated under vacuum. The crude product was purified by column chromatography on silica gel (eluent: hexanes/EtOAc) to afford the desired substituted aldehyde (69–85% yield).

To a dry Schlenk tube were added the substituted aldehyde (5 mmol) and freshly distilled THF (20 mL) under nitrogen atmosphere. Next, ethynyl magnesium bromide (0.5 M, 6 mmol, 12 mL) was added slowly at room temperature and stirred at this temperature for 1 h. The progress of the reaction was monitored by TLC. Upon completion, the reaction was quenched with aqueous NH<sub>4</sub>Cl. The resulting mixture was extracted with DCM (3 x 50 mL). The combined organic layers was dried over anhydrous MgSO<sub>4</sub> and concentrated under vacuum. The crude propargyl alcohol was directly used in the next step without further purification.

To the solution of crude propargyl alcohol (5 mmol), PGNHBoc (5.5 mmol) and PPh<sub>3</sub> (12.5 mmol, 3.28 g) in THF (30 mL) was added DEAD (12.5 mmol, 2.0 mL) dropwise at room temperature and stirred for additional 30 min. The progress of the reaction was

monitored by TLC. Upon completion, the solution was concentrated under reduced pressure. The residue was purified by column chromatography on silica gel (eluent: hexanes/EtOAc) to give the desired product (53–78% yield, 2 steps).

To a solution of the above product (3 mmol) in DCM (3 mL) and Et<sub>3</sub>N (9 mL) were added Pd(PPh<sub>3</sub>)<sub>2</sub>Cl<sub>2</sub> (0.03 mmol, 21.1 mg), CuI (0.06 mmol, 11.4 mg) and the corresponding aryl iodide derivative (3 mmol). The reaction was stirred at 50 °C for 5 h and the progress of the reaction was monitored by TLC. Upon completion, the mixture was concentrated under reduced pressure and purified by column chromatography on silica gel (eluent: hexanes/EtOAc) to give the protected propargylamide (63–88% yield).

To a solution of Boc-protected propargylamide (2 mmol) in MeOH (10 mL) was added K<sub>2</sub>CO<sub>3</sub> (20 mmol, 2.76 g). After stirring at 50 °C for 12 h, the mixture was filtered through a pad of silica gel and the filtrate was concentrated under reduced pressure. The obtained crude product was directly used in the next step without further purification.

To a solution of the above propargylamide (1 mmol) in toluene (5 mL) were added copper bromide (0.5 mmol, 71.8 mg), DMEDA (1 mmol, 107 μL), K<sub>3</sub>PO<sub>4</sub> (4 mmol, 0.85 g) and corresponding alkynyl bromide (1.5 mmol)<sup>2,3</sup>. The reaction was stirred at room temperature for 5 h and the progress of the reaction was monitored by TLC. Upon completion, the solution was filtered and concentrated under reduced pressure. The residue was purified by column chromatography on silica gel (eluent: hexanes/EtOAc) to give ynamide **1** (39–88% yield, 2 steps).

***N*-(1-cyclohexyl-4-(4-(dimethylamino)phenyl)but-3-yn-2-yl)-*N*-((2,6-dimethylphenyl)ethynyl)-4-methylbenzenesulfonamide (1a)**

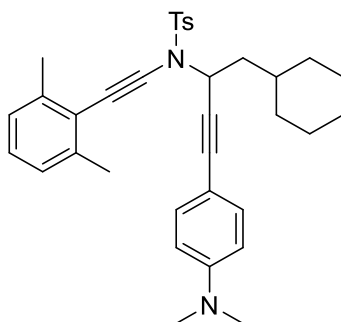

**1a**

Pale yellow oil (79%, 436.9 mg), (eluent: PE/EtOAc = 8/1).  $^1\text{H}$  NMR (500 MHz,  $\text{CDCl}_3$ )  $\delta$  7.92 (d,  $J = 8.0$  Hz, 2H), 7.24 (d,  $J = 8.0$  Hz, 2H), 7.06 – 6.98 (m, 3H), 6.91 (d,  $J = 8.5$  Hz, 2H), 6.50 (d,  $J = 9.0$  Hz, 2H), 5.03 (dd,  $J = 9.0, 6.5$  Hz, 1H), 2.92 (s, 6H), 2.39 (s, 6H), 2.34 (s, 3H), 2.00 – 1.89 (m, 2H), 1.75 – 1.60 (m, 5H), 1.34 – 1.20 (m, 4H), 1.04 – 0.91 (m, 2H);  $^{13}\text{C}$  NMR (125 MHz,  $\text{CDCl}_3$ )  $\delta$  150.0, 144.4, 139.8, 134.8, 132.6, 129.4, 128.2, 127.0, 126.5, 122.9, 111.4, 109.0, 88.1, 86.4, 82.9, 70.4, 51.6, 42.1, 40.1, 33.7, 33.2, 32.4, 26.4, 26.1, 26.0, 21.5, 21.2; IR (neat): 2923, 2851, 2230(s), 1609, 1522, 1447, 1367, 1187, 1169, 1090; HRESIMS Calcd for  $[\text{C}_{35}\text{H}_{40}\text{KN}_2\text{O}_2\text{S}]^+$  ( $\text{M} + \text{K}^+$ ) 591.2442, found 591.2443.

***N*-(1-cyclohexyl-4-(4-(dimethylamino)phenyl)but-3-yn-2-yl)-*N*-((2,6-dimethylphenyl)ethynyl)-4-methoxybenzenesulfonamide (1b)**

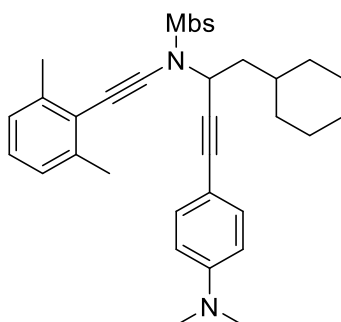

**1b**

Pale yellow oil (86%, 489.3 mg), (eluent: PE/EtOAc = 5/1).  $^1\text{H}$  NMR (500 MHz,  $\text{CDCl}_3$ )  $\delta$  7.96 (d,  $J = 9.0$  Hz, 2H), 7.08 – 6.97 (m, 3H), 6.93 (d,  $J = 8.5$  Hz, 2H), 6.88 (d,  $J = 9.0$  Hz, 2H), 6.48 (d,  $J = 8.5$  Hz, 2H), 5.03 (dd,  $J = 9.0, 6.5$  Hz, 1H), 3.71 (s, 3H), 2.90 (s, 6H), 2.40 (s, 6H), 2.02 – 1.86 (m, 2H), 1.81 – 1.59 (m, 6H), 1.35 – 1.14 (m, 3H), 1.05 – 0.90 (m, 2H);  $^{13}\text{C}$  NMR (125 MHz,  $\text{CDCl}_3$ )  $\delta$  163.5, 149.9, 139.7, 132.5, 130.3, 129.2, 126.9, 126.4, 122.8, 113.9, 111.3, 108.9, 88.2, 86.4, 83.0, 70.3, 55.4, 51.4, 42.0, 40.0, 33.7, 33.2, 32.3, 26.4, 26.0, 25.9, 21.2; IR (neat): 2923, 2850, 2229(s), 1609, 1522, 1446, 1365, 1186, 1162, 1091; HRESIMS Calcd for  $[\text{C}_{35}\text{H}_{40}\text{KN}_2\text{O}_3\text{S}]^+$  ( $\text{M} + \text{K}^+$ ) 607.2391, found 607.2380.

***N*-(1-cyclohexyl-4-(4-(dimethylamino)phenyl)but-3-yn-2-yl)-*N*-((2,6-dimethylphenyl)ethynyl)benzenesulfonamide (1c)**

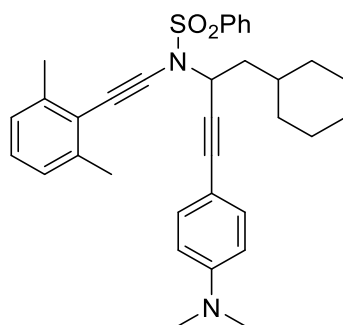

**1c**

Pale yellow oil (81%, 436.6 mg), (eluent: PE/EtOAc = 8/1).  $^1\text{H}$  NMR (500 MHz,  $\text{CDCl}_3$ )  $\delta$  8.05 (d,  $J = 7.5$  Hz, 2H), 7.58 – 7.53 (m, 1H), 7.51 – 7.43 (m, 2H), 7.07 – 6.98 (m, 3H), 6.93 (d,  $J = 9.0$  Hz, 2H), 6.50 (d,  $J = 8.5$  Hz, 2H), 5.07 (dd,  $J = 9.0, 6.5$  Hz, 1H), 2.93 (s, 6H), 2.38 (s, 6H), 2.02 – 1.88 (m, 2H), 1.80 – 1.62 (m, 6H), 1.21 – 1.15 (m, 1H), 1.05 – 0.93 (m, 2H);  $^{13}\text{C}$  NMR (125 MHz,  $\text{CDCl}_3$ )  $\delta$  150.0, 140.0, 137.8, 133.4, 132.7, 128.8, 128.2, 127.1, 126.5, 122.8, 111.4, 108.9, 87.8, 86.6, 82.9, 70.5, 51.7, 42.2, 40.1, 33.8, 33.3, 32.4, 26.5, 26.1, 26.0, 21.2; IR (neat): 2923, 2851, 2229(s), 1609, 1522, 1448, 1367, 1170, 1144, 1089; HRESIMS Calcd for  $[\text{C}_{34}\text{H}_{38}\text{N}_2\text{NaO}_2\text{S}]^+$  ( $\text{M} + \text{Na}^+$ ) 561.2546, found 561.2544.

***N*-(1-cyclohexyl-4-(4-(dimethylamino)phenyl)but-3-yn-2-yl)-*N*-((2,6-dimethylphenyl)ethynyl)benzenesulfonamide (1d)**

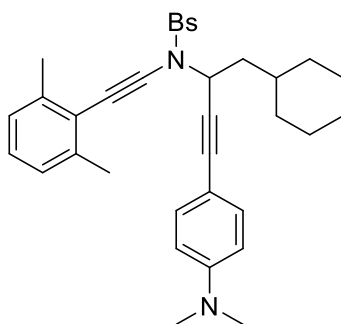

**1d**

Pale yellow oil (71%, 438.8 mg), (eluent: PE/EtOAc = 8/1).  $^1\text{H}$  NMR (500 MHz,  $\text{CDCl}_3$ )  $\delta$  7.90 (d,  $J = 8.5$  Hz, 2H), 7.59 (d,  $J = 9.0$  Hz, 2H), 7.10 – 6.98 (m, 3H), 6.90 (d,  $J = 8.5$  Hz, 2H), 6.54 (d,  $J = 9.0$  Hz, 2H), 5.03 (dd,  $J = 9.0, 6.5$  Hz, 1H), 2.94 (s, 6H), 2.39

(s, 6H), 2.03 – 1.88 (m, 2H), 1.79 – 1.61 (m, 6H), 1.39 – 1.22 (m, 3H), 1.04 – 0.92 (m, 2H);  $^{13}\text{C}$  NMR (125 MHz,  $\text{CDCl}_3$ )  $\delta$  150.1, 140.0, 136.6, 132.6, 132.0, 129.7, 128.8, 127.3, 126.5, 122.5, 111.6, 108.5, 87.5, 87.0, 82.6, 70.6, 51.9, 42.0, 40.1, 33.7, 33.2, 32.3, 26.4, 26.1, 25.9, 21.2; IR (neat): 2923, 2851, 2230(s), 1608, 1522, 1447, 1371, 1172, 1144, 1088; HRESIMS Calcd for  $[\text{C}_{34}\text{H}_{37}\text{BrN}_2\text{NaO}_2\text{S}]^+$  ( $\text{M} + \text{Na}^+$ ) 639.1651, found 639.1644.

***N*-(1-cyclohexyl-4-(4-(dimethylamino)phenyl)but-3-yn-2-yl)-*N*-((2,6-dimethylphenyl)ethynyl)methanesulfonamide (1e)**

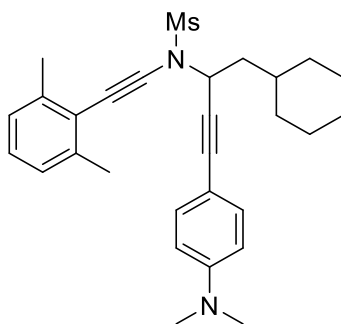

**1e**

Pale yellow oil (88%, 419.5 mg), (eluent: PE/EtOAc = 8/1).  $^1\text{H}$  NMR (400 MHz,  $\text{CDCl}_3$ )  $\delta$  7.26 (d,  $J = 8.8$  Hz, 2H), 7.13 – 6.92 (m, 3H), 6.59 (d,  $J = 8.8$  Hz, 2H), 4.99 (dd,  $J = 8.8, 6.4$  Hz, 1H), 3.25 (s, 3H), 2.95 (s, 6H), 2.45 (s, 6H), 2.09 – 1.96 (m, 1H), 1.94 – 1.58 (m, 7H), 1.34 – 1.13 (m, 3H), 1.07 – 0.87 (m, 2H);  $^{13}\text{C}$  NMR (100 MHz,  $\text{CDCl}_3$ )  $\delta$  150.3, 139.7, 132.8, 127.2, 126.6, 122.5, 111.6, 108.4, 87.6, 87.3, 83.2, 70.9, 51.5, 41.8, 40.1, 37.9, 33.8, 33.2, 32.3, 26.4, 26.1, 25.9, 21.2; IR (neat): 2923, 2850, 2230(s), 1552, 1365, 1162; HRESIMS Calcd for  $[\text{C}_{29}\text{H}_{36}\text{N}_2\text{NaO}_2\text{S}]^+$  ( $\text{M} + \text{Na}^+$ ) 499.2390, found 499.2397.

***N*-(1-cyclohexyl-4-(4-(dibenzylamino)phenyl)but-3-yn-2-yl)-*N*-((2,6-dimethylphenyl)ethynyl)-4-methylbenzenesulfonamide (1f)**

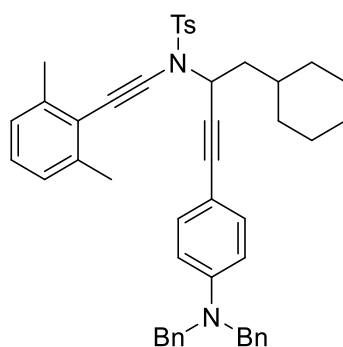

**1f**

Pale yellow oil (69%, 486.5 mg), (eluent: PE/EtOAc = 8/1).  $^1\text{H}$  NMR (500 MHz,  $\text{CDCl}_3$ )  $\delta$  7.89 (d,  $J = 8.5$  Hz, 2H), 7.35 – 7.24 (m, 6H), 7.22 – 7.17 (m, 6H), 7.07 – 7.02 (m, 1H), 7.02 – 6.97 (m, 2H), 6.84 (d,  $J = 8.5$  Hz, 2H), 6.53 (d,  $J = 9.0$  Hz, 2H), 5.01 (dd,  $J = 9.0, 6.5$  Hz, 1H), 4.63 (s, 4H), 2.38 (s, 6H), 2.23 (s, 3H), 2.00 – 1.84 (m, 2H), 1.76 – 1.58 (m, 6H), 1.29 – 1.12 (m, 3H), 1.03 – 0.91 (m, 2H);  $^{13}\text{C}$  NMR (125 MHz,  $\text{CDCl}_3$ )  $\delta$  148.8, 144.4, 139.7, 137.8, 134.8, 132.8, 129.4, 128.7, 128.2, 127.1, 126.9, 126.5, 126.4, 122.9, 111.7, 109.7, 88.2, 86.2, 83.1, 70.5, 54.1, 51.6, 42.1, 33.8, 33.2, 32.4, 26.5, 26.1, 26.0, 21.5, 21.2; IR (neat): 3061, 2920, 2851, 2228(s), 1607, 1519, 1361, 1168; HRESIMS Calcd for  $[\text{C}_{47}\text{H}_{49}\text{N}_2\text{O}_2\text{S}]^+$  ( $\text{M} + \text{H}^+$ ) 705.3509, found 705.3511.

***N*-(1-cyclohexyl-4-(4-(diethylamino)phenyl)but-3-yn-2-yl)-*N*-((2,6-dimethylphenyl)ethynyl)-4-methylbenzenesulfonamide (1g)**

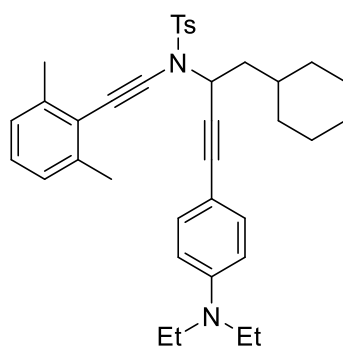

**1g**

Pale yellow oil (63%, 366.1 mg), (eluent: PE/EtOAc = 8/1).  $^1\text{H}$  NMR (500 MHz,  $\text{CDCl}_3$ )  $\delta$  7.92 (d,  $J = 8.5$  Hz, 2H), 7.24 (d,  $J = 7.5$  Hz, 2H), 7.09 – 7.02 (m, 1H), 7.01 – 6.96 (m, 2H), 6.88 (d,  $J = 9.0$  Hz, 2H), 6.45 (d,  $J = 9.5$  Hz, 2H), 5.03 (dd,  $J = 9.0, 6.5$  Hz, 1H), 3.31 (q,  $J = 7.0$  Hz, 4H), 2.40 (s, 6H), 2.33 (s, 3H), 2.01 – 1.86 (m, 2H), 1.80 –

1.56 (m, 6H), 1.36 – 1.16 (m, 3H), 1.13 (t,  $J = 7.0$  Hz, 6H), 1.05 – 0.89 (m, 2H);  $^{13}\text{C}$  NMR (125 MHz,  $\text{CDCl}_3$ )  $\delta$  147.4, 144.4, 139.8, 134.8, 132.8, 129.4, 128.1, 126.9, 126.5, 122.9, 110.7, 107.8, 88.2, 86.6, 82.6, 51.6, 44.2, 42.1, 33.7, 33.2, 32.4, 26.4, 26.1, 26.0, 21.5, 21.2, 12.4; IR (neat): 3044, 2922, 2851, 2230(s), 1609, 1520, 1361, 1306, 1186, 1090, 942; HRESIMS Calcd for  $[\text{C}_{37}\text{H}_{45}\text{N}_2\text{O}_2\text{S}]^+$  ( $\text{M} + \text{H}^+$ ) 581.3196, found 581.3191.

***N*-(1-cyclohexyl-4-(4-(piperidin-1-yl)phenyl)but-3-yn-2-yl)-*N*-((2,6-dimethylphenyl)ethynyl)-4-methylbenzenesulfonamide (1h)**

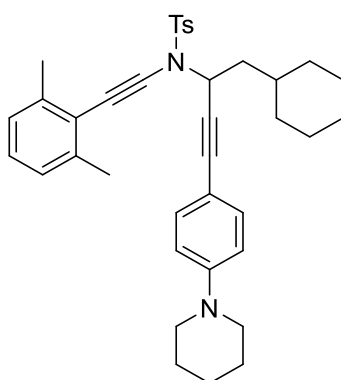

**1h**

Pale yellow oil (72%, 423.1 mg), (eluent: PE/EtOAc = 8/1).  $^1\text{H}$  NMR (500 MHz,  $\text{CDCl}_3$ )  $\delta$  7.91 (d,  $J = 8.0$  Hz, 2H), 7.22 (d,  $J = 8.0$  Hz, 2H), 7.07 – 7.01 (m, 1H), 7.01 – 6.95 (m, 2H), 6.91 (d,  $J = 9.0$  Hz, 2H), 6.70 (d,  $J = 9.0$  Hz, 2H), 5.03 (dd,  $J = 9.0, 6.5$  Hz, 1H), 3.22 – 3.05 (m, 4H), 2.39 (s, 6H), 2.31 (s, 3H), 2.03 – 1.86 (m, 2H), 1.77 – 1.55 (m, 12H), 1.32 – 1.12 (m, 3H), 1.04 – 0.91 (m, 2H);  $^{13}\text{C}$  NMR (125 MHz,  $\text{CDCl}_3$ )  $\delta$  151.4, 144.4, 139.7, 134.7, 132.4, 129.3, 128.1, 126.9, 126.4, 122.8, 114.8, 111.2, 88.0, 86.1, 83.2, 70.4, 51.4, 49.4, 42.0, 33.7, 33.2, 32.3, 26.4, 26.0, 25.9, 25.4, 24.1, 21.5, 21.1; IR (neat): 2924, 2851, 2229(s), 1604, 1514, 1449, 1369, 1237, 1169; HRESIMS Calcd for  $[\text{C}_{38}\text{H}_{44}\text{N}_2\text{NaO}_2\text{S}]^+$  ( $\text{M} + \text{Na}^+$ ) 615.3016, found 615.3021.

***N*-(1-cyclohexyl-4-(4-morpholinophenyl)but-3-yn-2-yl)-*N*-((2,6-dimethylphenyl)ethynyl)-4-methylbenzenesulfonamide (1i)**

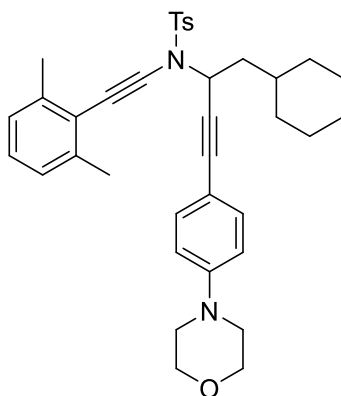

**1i**

Pale yellow oil (83%, 493.9 mg), (eluent: PE/EtOAc = 8/1).  $^1\text{H}$  NMR (500 MHz,  $\text{CDCl}_3$ )  $\delta$  7.91 (d,  $J = 8.0$  Hz, 2H), 7.23 (d,  $J = 8.0$  Hz, 2H), 7.06 – 7.02 (m, 1H), 7.01 – 6.97 (m, 2H), 6.95 (d,  $J = 9.0$  Hz, 2H), 6.70 (d,  $J = 9.0$  Hz, 2H), 5.04 (dd,  $J = 9.0, 6.5$  Hz, 1H), 3.82 – 3.77 (m, 4H), 3.14 – 3.07 (m, 4H), 2.39 (s, 6H), 2.32 (s, 3H), 2.01 – 1.87 (m, 2H), 1.83 – 1.49 (m, 7H), 1.26 – 1.12 (m, 2H), 1.04 – 0.90 (m, 2H);  $^{13}\text{C}$  NMR (125 MHz,  $\text{CDCl}_3$ )  $\delta$  150.7, 144.4, 139.6, 134.6, 132.5, 129.3, 128.0, 126.9, 126.4, 122.7, 114.3, 112.5, 87.9, 85.7, 83.6, 70.3, 66.5, 51.3, 48.2, 41.9, 33.6, 33.1, 32.2, 26.3, 26.0, 25.8, 21.4, 21.1; IR (neat): 2923, 2851, 2230(s), 1606, 1514, 1367, 1168, 1089; HRESIMS Calcd for  $[\text{C}_{37}\text{H}_{42}\text{N}_2\text{NaO}_3\text{S}]^+$  ( $\text{M} + \text{Na}^+$ ) 617.2808, found 617.2809.

***N*-(1-cyclohexyl-4-(4-(dimethylamino)-2-methylphenyl)but-3-yn-2-yl)-*N*-((2,6-dimethylphenyl)ethynyl)-4-methylbenzenesulfonamide (1j)**

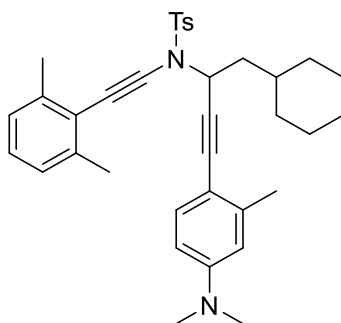

**1j**

Pale yellow oil (79%, 447.8 mg), (eluent: PE/EtOAc = 8/1).  $^1\text{H}$  NMR (500 MHz,  $\text{CDCl}_3$ )  $\delta$  7.92 (d,  $J = 8.5$  Hz, 2H), 7.24 (d,  $J = 9.0$  Hz, 2H), 7.07 – 7.02 (m, 1H), 7.01 – 6.97 (m, 2H), 6.86 (d,  $J = 8.5$  Hz, 1H), 6.42 – 6.39 (m, 1H), 6.37 (dd,  $J = 8.5, 2.5$  Hz, 1H), 5.10 (dd,  $J = 9.0, 7.0$  Hz, 1H), 2.92 (s, 6H), 2.37 (s, 6H), 2.33 (s, 3H), 2.08 (s, 3H), 2.01



– 1.52 (m, 10H), 1.21 – 1.14 (m, 1H), 1.06 – 0.92 (m, 2H);  $^{13}\text{C}$  NMR (125 MHz,  $\text{CDCl}_3$ )  $\delta$  150.2, 144.4, 141.0, 139.7, 135.0, 132.9, 129.4, 128.1, 126.9, 126.5, 122.9, 112.6, 109.4, 109.2, 88.1, 86.7, 85.5, 70.7, 51.7, 42.4, 40.2, 33.9, 33.2, 32.6, 26.5, 26.1, 26.0, 21.5, 21.2, 20.9; IR (neat): 2922, 2851, 2230(s), 1608, 1510, 1471, 1366, 1000, 800; HRESIMS Calcd for  $[\text{C}_{36}\text{H}_{42}\text{N}_2\text{NaO}_2\text{S}]^+$  ( $\text{M} + \text{Na}^+$ ) 589.2859, found 589.2866.

***N*-(1-cyclohexyl-4-(4-(dimethylamino)phenyl)but-3-yn-2-yl)-*N*-(mesitylethynyl)-4-methylbenzenesulfonamide (1k)**

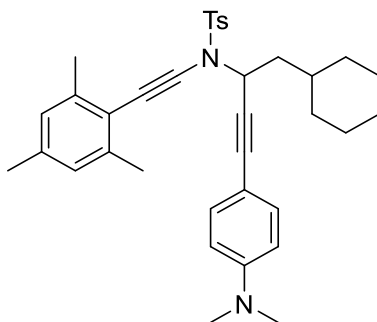

**1k**

Pale yellow oil (84%, 476.2 mg), (eluent: PE/EtOAc = 8/1).  $^1\text{H}$  NMR (400 MHz,  $\text{CDCl}_3$ )  $\delta$  7.90 (d,  $J = 8.0$  Hz, 2H), 7.18 (d,  $J = 8.0$  Hz, 2H), 6.90 (d,  $J = 8.8$  Hz, 2H), 6.79 (s, 2H), 6.45 (d,  $J = 8.8$  Hz, 2H), 5.04 (dd,  $J = 8.8, 6.4$  Hz, 1H), 2.85 (s, 6H), 2.35 (s, 6H), 2.28 (s, 3H), 2.21 (s, 3H), 2.01 – 1.89 (m, 2H), 1.80 – 1.60 (m, 6H), 1.32 – 1.12 (m, 3H), 1.06 – 0.91 (m, 2H);  $^{13}\text{C}$  NMR (100 MHz,  $\text{CDCl}_3$ )  $\delta$  149.8, 144.2, 139.6, 136.8, 134.6, 132.4, 129.2, 127.9, 127.3, 119.6, 111.2, 108.7, 87.1, 86.4, 82.8, 70.1, 51.4, 42.0, 39.7, 33.6, 33.1, 32.2, 26.3, 26.0, 25.8, 21.3, 21.0, 20.9; IR (neat): 2922, 2850, 2229(s), 1608, 1522, 1446, 1365, 1167, 1089, 815; HRESIMS Calcd for  $[\text{C}_{36}\text{H}_{42}\text{N}_2\text{NaO}_2\text{S}]^+$  ( $\text{M} + \text{Na}^+$ ) 589.2859, found 589.2854.

***N*-(1-cyclohexyl-4-(4-(dimethylamino)phenyl)but-3-yn-2-yl)-*N*-((4-fluoro-2,6-dimethylphenyl)ethynyl)-4-methylbenzenesulfonamide (1l)**

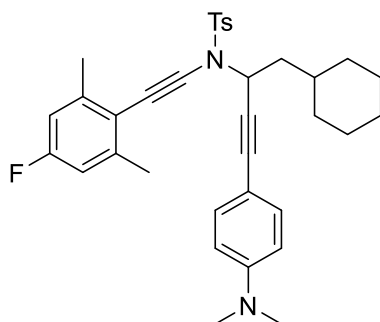

**1l**

Pale yellow oil (81%, 462.4 mg), (eluent: PE/EtOAc = 8/1).  $^1\text{H}$  NMR (500 MHz,  $\text{CDCl}_3$ )  $\delta$  7.91 (d,  $J = 8.5$  Hz, 2H), 7.27 (d,  $J = 7.0$  Hz, 2H), 6.91 (d,  $J = 9.0$  Hz, 2H), 6.72 (d,  $J = 9.0$  Hz, 2H), 6.51 (d,  $J = 9.0$  Hz, 2H), 5.02 (dd,  $J = 9.0, 6.5$  Hz, 1H), 2.95 (s, 6H), 2.36 (s, 9H), 1.99 – 1.87 (m, 2H), 1.78 – 1.64 (m, 6H), 1.36 – 1.17 (m, 2H), 1.17 – 1.13 (m, 1H), 1.06 – 0.90 (m, 2H);  $^{13}\text{C}$  NMR (150 MHz,  $\text{CDCl}_3$ )  $\delta$  161.5 (d,  $J = 247.4$  Hz), 150.0, 144.5, 142.6 (d,  $J = 8.6$  Hz), 134.8, 132.6, 129.4, 128.2, 118.8 (d,  $J = 2.8$  Hz), 113.5 (d,  $J = 21.7$  Hz), 111.4, 109.0, 87.5, 86.5, 82.9, 69.3, 51.6, 42.2, 40.1, 33.8, 33.3, 32.4, 26.4, 26.1, 26.0, 21.6, 21.3 (d,  $J = 1.3$  Hz);  $^{19}\text{F}$  NMR (376 MHz,  $\text{CDCl}_3$ )  $\delta$  -113.6 – -113.9 (m); IR (neat): 2923, 2850, 2229(s), 1609, 1523, 1370, 1165; HRESIMS Calcd for  $[\text{C}_{35}\text{H}_{39}\text{FN}_2\text{NaO}_2\text{S}]^+$  ( $\text{M} + \text{Na}^+$ ) 593.2608, found 593.2611.

***N*-((4-chloro-2,6-dimethylphenyl)ethynyl)-*N*-(1-cyclohexyl-4-(4-(dimethylamino)phenyl)but-3-yn-2-yl)-4-methylbenzenesulfonamide (1m)**

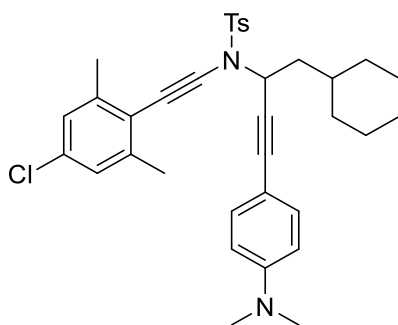

**1m**

Pale yellow oil (81%, 475.5 mg), (eluent: PE/EtOAc = 8/1).  $^1\text{H}$  NMR (500 MHz,  $\text{CDCl}_3$ )  $\delta$  7.90 (d,  $J = 8.0$  Hz, 2H), 7.26 (d,  $J = 8.5$  Hz, 2H), 6.99 (s, 2H), 6.91 (d,  $J = 9.0$  Hz, 2H), 6.50 (d,  $J = 9.0$  Hz, 2H), 5.03 (dd,  $J = 9.0, 6.5$  Hz, 1H), 2.93 (s, 6H), 2.35 (s, 3H), 2.34 (s, 6H), 1.97 – 1.85 (m, 2H), 1.81 – 1.54 (m, 6H), 1.35 – 1.23 (m, 2H), 1.22 – 1.10

(m, 1H), 1.05 – 0.91 (m, 2H);  $^{13}\text{C}$  NMR (125 MHz,  $\text{CDCl}_3$ )  $\delta$  150.0, 144.6, 141.5, 134.7, 132.6, 132.4, 129.4, 128.1, 126.5, 121.5, 111.4, 108.9, 88.8, 86.5, 82.8, 69.6, 51.7, 42.2, 40.1, 33.8, 33.2, 32.4, 26.4, 26.1, 25.9, 21.6, 21.1; IR (neat): 2922, 2851, 2230(s), 1608, 1522, 1362, 1293, 1186, 1019, 815; HRESIMS Calcd for  $[\text{C}_{35}\text{H}_{39}\text{ClN}_2\text{NaO}_2\text{S}]^+$  ( $\text{M} + \text{Na}^+$ ) 609.2313, found 609.2319.

***N*-((4-bromo-2,6-dimethylphenyl)ethynyl)-*N*-(1-cyclohexyl-4-(4-(dimethylamino)phenyl)but-3-yn-2-yl)-4-methylbenzenesulfonamide (1n)**

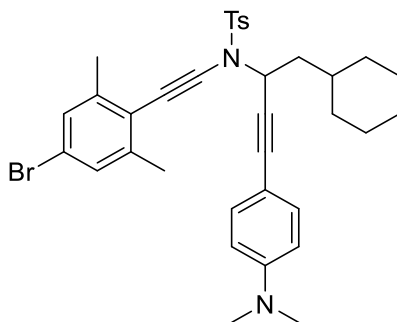

**1n**

Pale yellow oil (80%, 505.2 mg), (eluent: PE/EtOAc = 8/1).  $^1\text{H}$  NMR (400 MHz,  $\text{CDCl}_3$ )  $\delta$  7.90 (d,  $J = 8.4$  Hz, 2H), 7.25 (d,  $J = 8.0$  Hz, 2H), 7.15 (s, 2H), 6.91 (d,  $J = 8.4$  Hz, 2H), 6.50 (d,  $J = 8.4$  Hz, 2H), 5.11 – 4.95 (m, 1H), 2.92 (s, 6H), 2.35 (s, 9H), 2.02 – 1.84 (m, 2H), 1.78 – 1.59 (m, 6H), 1.30 – 1.16 (m, 3H), 1.07 – 0.90 (m, 2H);  $^{13}\text{C}$  NMR (100 MHz,  $\text{CDCl}_3$ )  $\delta$  150.0, 144.6, 141.6, 134.7, 132.6, 129.4, 129.4, 128.1, 122.0, 120.7, 111.4, 108.8, 89.1, 86.6, 82.8, 69.8, 51.7, 42.2, 40.1, 33.8, 33.2, 32.4, 26.4, 26.1, 25.9, 21.5, 21.0; IR (neat): 2923, 2850, 2229(s), 1609, 1521, 1367, 1315, 1190, 1001, 815; HRESIMS Calcd for  $[\text{C}_{35}\text{H}_{39}\text{BrN}_2\text{NaO}_2\text{S}]^+$  ( $\text{M} + \text{Na}^+$ ) 653.1808, found 653.1811.

***N*-(1-cyclohexyl-4-(4-(dimethylamino)phenyl)but-3-yn-2-yl)-*N*-((3,5-dimethyl-[1,1'-biphenyl]-4-yl)ethynyl)-4-methylbenzenesulfonamide (1o)**

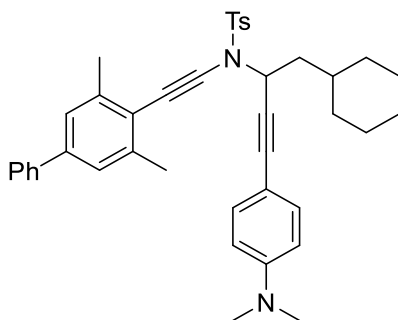

**1o**

Pale yellow oil (84%, 528.4 mg), (eluent: PE/EtOAc = 8/1).  $^1\text{H}$  NMR (500 MHz,  $\text{CDCl}_3$ )  $\delta$  7.93 (d,  $J = 8.5$  Hz, 2H), 7.59 – 7.50 (m, 2H), 7.40 (t,  $J = 7.5$  Hz, 2H), 7.34 – 7.28 (m, 1H), 7.26 – 7.20 (m, 4H), 6.92 (d,  $J = 9.0$  Hz, 2H), 6.50 (d,  $J = 9.0$  Hz, 2H), 5.05 (dd,  $J = 9.0, 6.5$  Hz, 1H), 2.92 (s, 6H), 2.45 (s, 6H), 2.34 (s, 3H), 2.03 – 1.88 (m, 2H), 1.81 – 1.59 (m, 6H), 1.33 – 1.23 (m, 2H), 1.21 – 1.12 (m, 1H), 1.06 – 0.90 (m, 2H);  $^{13}\text{C}$  NMR (125 MHz,  $\text{CDCl}_3$ )  $\delta$  150.0, 144.4, 140.8, 140.2, 139.8, 134.8, 132.6, 129.4, 128.7, 128.2, 127.2, 127.0, 125.3, 122.0, 111.4, 109.0, 88.7, 86.5, 82.9, 70.4, 51.7, 42.2, 40.1, 33.8, 33.3, 32.4, 26.5, 26.1, 26.0, 21.6, 21.4; IR (neat): 2925, 2851, 2231(s), 1596, 1504, 1489, 1443, 1214, 1170, 814; HRESIMS Calcd for  $[\text{C}_{41}\text{H}_{44}\text{N}_2\text{NaO}_2\text{S}]^+$  ( $M + \text{Na}^+$ ) 651.3016, found 651.3021.

***N*-(1-cyclohexyl-4-(4-(dimethylamino)phenyl)but-3-yn-2-yl)-*N*-((2,6-dimethyl-4-((trimethylsilyl)ethynyl)phenyl)ethynyl)-4-methylbenzenesulfonamide (1p)**

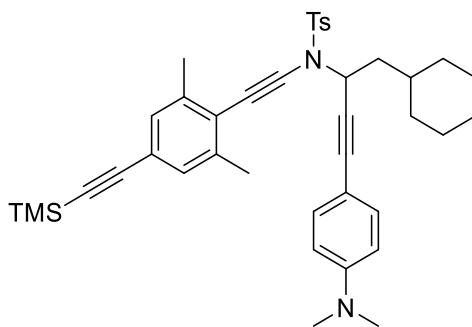

**1p**

Pale yellow oil (77%, 499.3 mg), (eluent: PE/EtOAc = 8/1).  $^1\text{H}$  NMR (500 MHz,  $\text{CDCl}_3$ )  $\delta$  7.90 (d,  $J = 8.0$  Hz, 2H), 7.27 – 7.22 (m, 2H), 7.12 (s, 2H), 6.91 (d,  $J = 8.5$  Hz, 2H), 6.49 (d,  $J = 9.0$  Hz, 2H), 5.03 (dd,  $J = 9.0, 6.5$  Hz, 1H), 2.92 (s, 6H), 2.34 (s, 6H), 2.33 (s, 3H), 1.98 – 1.84 (m, 2H), 1.80 – 1.59 (m, 6H), 1.30 – 1.14 (m, 3H), 1.06 – 0.90 (m,

2H), 0.23 (s, 9H);  $^{13}\text{C}$  NMR (125 MHz,  $\text{CDCl}_3$ )  $\delta$  150.0, 144.5, 139.4, 134.7, 132.6, 129.9, 129.4, 128.1, 123.5, 121.2, 111.4, 108.8, 105.2, 94.6, 89.8, 86.6, 70.6, 51.7, 42.2, 40.1, 33.7, 33.2, 32.4, 26.4, 26.1, 25.9, 21.5, 20.9, -0.1; IR (neat): 2925, 2851, 2231(s), 1596, 1450, 1371, 1187, 1170, 1109, 816; HRESIMS Calcd for  $[\text{C}_{40}\text{H}_{48}\text{KN}_2\text{O}_2\text{SSi}]^+$  (M +  $\text{K}^+$ ) 687.2837, found 687.2834.

***N*-(1-cyclohexyl-4-(4-(dimethylamino)phenyl)but-3-yn-2-yl)-*N*-((2,6-dimethoxyphenyl)ethynyl)-4-methylbenzenesulfonamide (1q)**

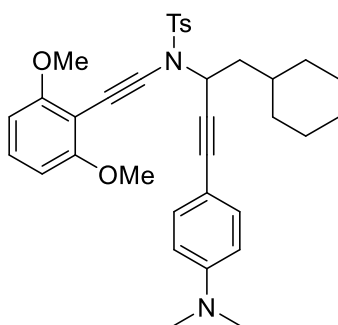

**1q**

Pale yellow oil (80%, 467.8 mg), (eluent: PE/EtOAc = 4/1).  $^1\text{H}$  NMR (400 MHz,  $\text{CDCl}_3$ )  $\delta$  8.04 (d,  $J = 8.0$  Hz, 2H), 7.20 (d,  $J = 8.0$  Hz, 2H), 7.12 (t,  $J = 8.4$  Hz, 1H), 6.88 (d,  $J = 8.8$  Hz, 2H), 6.52 – 6.38 (m, 4H), 5.14 – 4.87 (m, 1H), 3.78 (s, 6H), 2.88 (s, 6H), 2.30 (s, 3H), 2.09 – 1.86 (m, 2H), 1.82 – 1.57 (m, 6H), 1.32 – 1.14 (m, 3H), 1.06 – 0.88 (m, 2H);  $^{13}\text{C}$  NMR (100 MHz,  $\text{CDCl}_3$ )  $\delta$  161.0, 149.8, 143.9, 135.0, 132.5, 129.0, 128.6, 128.3, 111.2, 109.2, 103.6, 101.8, 87.5, 86.1, 83.0, 65.3, 55.8, 51.2, 41.6, 40.0, 33.5, 33.1, 32.3, 26.4, 26.0, 25.9, 21.4; IR (neat): 2923, 2850, 2242, 1608, 1582, 1474, 1359, 1255, 1112; HRESIMS Calcd for  $[\text{C}_{35}\text{H}_{40}\text{N}_2\text{NaO}_4\text{S}]^+$  (M +  $\text{Na}^+$ ) 607.2601, found 607.2607.

***N*-(1-cyclohexyl-4-(4-(dimethylamino)phenyl)but-3-yn-2-yl)-4-methyl-*N*-(*o*-tolylethynyl)benzenesulfonamide (1r)**

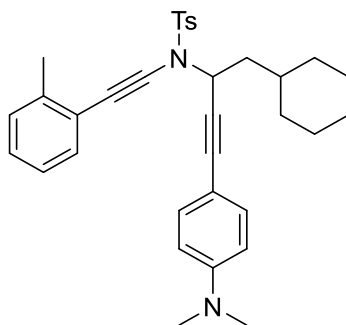

**1r**

Pale yellow oil (77%, 415.0 mg), (eluent: PE/EtOAc = 8/1).  $^1\text{H}$  NMR (400 MHz,  $\text{CDCl}_3$ )  $\delta$  7.91 (d,  $J = 8.4$  Hz, 2H), 7.39 (d,  $J = 7.6$  Hz, 1H), 7.26 (d,  $J = 6.0$  Hz, 2H), 7.20 – 7.06 (m, 3H), 6.92 (d,  $J = 8.8$  Hz, 2H), 6.51 (d,  $J = 8.8$  Hz, 2H), 5.01 (dd,  $J = 8.8, 6.4$  Hz, 1H), 2.94 (s, 6H), 2.35 (s, 6H), 1.98 – 1.83 (m, 2H), 1.80 – 1.58 (m, 6H), 1.33 – 1.14 (m, 3H), 1.08 – 0.89 (m, 2H);  $^{13}\text{C}$  NMR (100 MHz,  $\text{CDCl}_3$ )  $\delta$  150.0, 144.4, 140.0, 134.8, 132.6, 131.7, 129.4, 129.2, 128.3, 127.6, 125.4, 122.9, 111.4, 109.1, 86.5, 83.8, 82.9, 71.6, 51.6, 42.2, 40.2, 33.8, 33.2, 32.5, 26.5, 26.1, 26.0, 21.6, 20.9; IR (neat): 2923, 2850, 2229(s), 1608, 1522, 1149, 1367, 1174; HRESIMS Calcd for  $[\text{C}_{34}\text{H}_{38}\text{N}_2\text{NaO}_2\text{S}]^+$  ( $\text{M} + \text{Na}^+$ ) 561.2546, found 561.2541.

***N*-(1-cyclohexyl-4-(4-(dimethylamino)phenyl)but-3-yn-2-yl)-*N*-((2-fluorophenyl)ethynyl)-4-methylbenzenesulfonamide (1s)**

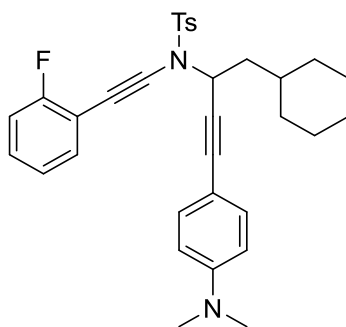

**1s**

Pale yellow oil (79%, 428.1 mg), (eluent: PE/EtOAc = 8/1).  $^1\text{H}$  NMR (400 MHz,  $\text{CDCl}_3$ )  $\delta$  7.93 (d,  $J = 8.2$  Hz, 2H), 7.43 – 7.35 (m, 1H), 7.27 – 7.21 (m, 3H), 7.09 – 7.00 (m, 2H), 6.95 (d,  $J = 8.8$  Hz, 2H), 6.51 (d,  $J = 8.8$  Hz, 2H), 5.15 – 4.81 (m, 1H), 2.94 (s, 6H), 2.34 (s, 3H), 1.99 – 1.82 (m, 2H), 1.82 – 1.58 (m, 7H), 1.25 – 1.09 (m, 2H), 1.05 – 0.91 (m, 2H);  $^{13}\text{C}$  NMR (100 MHz,  $\text{CDCl}_3$ )  $\delta$  162.6 (d,  $J = 250.0$  Hz), 150.0, 144.5,

134.7, 133.2, 132.7, 129.4, 129.2 (d,  $J = 8.0$  Hz), 128.3, 123.7 (d,  $J = 4.0$  Hz), 115.3 (d,  $J = 20.0$  Hz), 111.8 (d,  $J = 16.0$  Hz), 111.4, 109.1, 86.6, 84.9, 82.7, 66.5, 51.6, 42.0, 40.2, 33.8, 33.2, 32.5, 26.5, 26.1, 26.0, 21.6;  $^{19}\text{F}$  NMR (376 MHz,  $\text{CDCl}_3$ )  $\delta$  -109.5 – -109.9 (m); IR (neat): 2925, 2851, 2230(s), 1610, 1549, 1371, 1166, 817; HRESIMS Calcd for  $[\text{C}_{33}\text{H}_{35}\text{FN}_2\text{NaO}_2\text{S}]^+$  ( $\text{M} + \text{Na}^+$ ) 565.2295, found 565.2291.

***N*-((2-chlorophenyl)ethynyl)-*N*-(1-cyclohexyl-4-(4-(dimethylamino)phenyl)but-3-yn-2-yl)-4-methylbenzenesulfonamide (1t)**

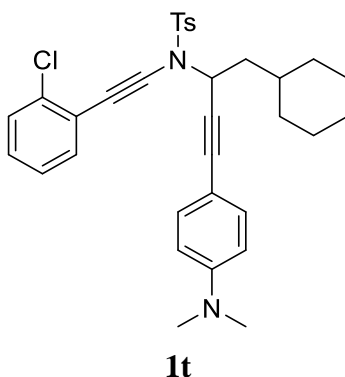

Pale yellow oil (66%, 369.1 mg), (eluent: PE/EtOAc = 8/1).  $^1\text{H}$  NMR (500 MHz,  $\text{CDCl}_3$ )  $\delta$  7.95 (d,  $J = 8.5$  Hz, 2H), 7.47 – 7.39 (m, 1H), 7.36 – 7.31 (m, 1H), 7.25 (d,  $J = 8.0$  Hz, 2H), 7.19 – 7.13 (m, 2H), 6.95 (d,  $J = 9.0$  Hz, 2H), 6.50 (d,  $J = 9.0$  Hz, 2H), 5.01 (dd,  $J = 9.0, 6.5$  Hz, 1H), 2.92 (s, 6H), 2.33 (s, 3H), 2.05 – 1.94 (m, 1H), 1.92 – 1.84 (m, 1H), 1.82 – 1.57 (m, 7H), 1.25 – 1.10 (m, 2H), 1.05 – 0.93 (m, 2H);  $^{13}\text{C}$  NMR (125 MHz,  $\text{CDCl}_3$ )  $\delta$  150.0, 144.5, 135.3, 134.7, 132.7, 129.4, 129.1, 128.4, 128.3, 126.2, 123.2, 111.4, 109.1, 86.6, 85.2, 82.7, 70.2, 51.7, 42.0, 40.1, 33.8, 33.2, 32.4, 26.5, 26.1, 26.0, 21.6; IR (neat): 2924, 2853, 2233(s), 1605, 1521, 1360, 1294, 1117, 1017; HRESIMS Calcd for  $[\text{C}_{33}\text{H}_{35}\text{ClN}_2\text{KO}_2\text{S}]^+$  ( $\text{M} + \text{K}^+$ ) 597.1739, found 597.1728.

***N*-((2-bromophenyl)ethynyl)-*N*-(1-cyclohexyl-4-(4-(dimethylamino)phenyl)but-3-yn-2-yl)-4-methylbenzenesulfonamide (1u)**

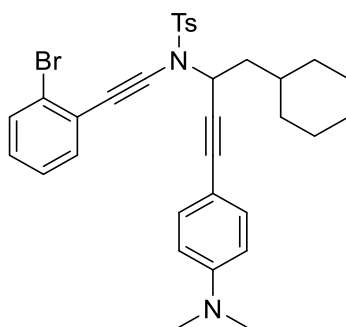

**1u**

Pale yellow oil (39%, 235.7 mg), (eluent: PE/EtOAc = 8/1).  $^1\text{H}$  NMR (500 MHz,  $\text{CDCl}_3$ )  $\delta$  7.95 (d,  $J = 8.5$  Hz, 2H), 7.52 (dd,  $J = 8.0, 1.0$  Hz, 1H), 7.41 (dd,  $J = 7.5, 1.5$  Hz, 1H), 7.25 (d,  $J = 8.0$  Hz, 2H), 7.23 – 7.18 (m, 1H), 7.11 – 7.05 (m, 1H), 6.95 (d,  $J = 9.0$  Hz, 2H), 6.50 (d,  $J = 9.0$  Hz, 2H), 5.01 (dd,  $J = 9.0, 6.5$  Hz, 1H), 2.92 (s, 6H), 2.33 (s, 3H), 2.03 – 1.96 (m, 1H), 1.92 – 1.85 (m, 1H), 1.84 – 1.60 (m, 6H), 1.28 – 1.22 (m, 2H), 1.21 – 1.11 (m, 1H), 1.05 – 0.90 (m, 2H);  $^{13}\text{C}$  NMR (125 MHz,  $\text{CDCl}_3$ )  $\delta$  150.0, 144.5, 134.7, 132.8, 132.7, 132.2, 129.4, 128.5, 128.3, 126.8, 125.5, 124.8, 111.4, 109.1, 86.6, 84.6, 82.8, 71.9, 51.7, 42.0, 40.1, 33.7, 33.2, 32.4, 26.4, 26.1, 26.0, 21.6; IR (neat): 2923, 2850, 2230(s), 1611, 1519, 1368, 1319, 1190, 1013, 817; HRESIMS Calcd for  $[\text{C}_{33}\text{H}_{35}\text{BrN}_2\text{NaO}_2\text{S}]^+$  ( $\text{M} + \text{Na}^+$ ) 625.1495, found 625.1499.

***N*-(1-cyclohexyl-4-(4-(dimethylamino)phenyl)but-3-yn-2-yl)-4-methyl-*N*-(*m*-tolylethynyl)benzenesulfonamide (1v)**

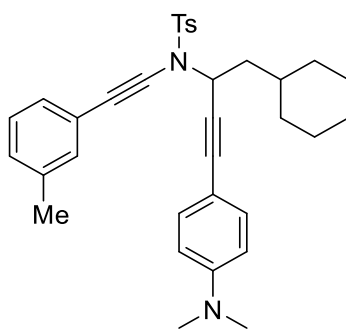

**1v**

Pale yellow oil (82%, 442.0 mg), (eluent: PE/EtOAc = 8/1).  $^1\text{H}$  NMR (500 MHz,  $\text{CDCl}_3$ )  $\delta$  7.90 (d,  $J = 8.5$  Hz, 2H), 7.24 (d,  $J = 8.0$  Hz, 2H), 7.21 – 7.12 (m, 3H), 7.07 (d,  $J = 7.5$  Hz, 1H), 6.95 (d,  $J = 9.0$  Hz, 2H), 6.51 (d,  $J = 9.0$  Hz, 2H), 4.98 (dd,  $J = 8.5, 6.5$  Hz, 1H), 2.92 (s, 6H), 2.33 (s, 3H), 2.29 (s, 3H), 1.95 – 1.84 (m, 2H), 1.81 – 1.59 (m,



6H), 1.29 – 1.08 (m, 3H), 1.06 – 0.87 (m, 2H);  $^{13}\text{C}$  NMR (125 MHz,  $\text{CDCl}_3$ )  $\delta$  150.0, 144.4, 137.7, 134.7, 132.6, 132.1, 129.3, 128.6, 128.5, 128.2, 128.0, 122.8, 111.4, 109.1, 86.5, 82.8, 79.7, 72.9, 51.6, 42.1, 40.1, 33.8, 33.1, 32.5, 26.4, 26.1, 26.0, 21.5, 21.1; IR (neat): 2920, 2849, 2228(s), 1605, 1525, 1457, 1366, 1168, 1013, 815; HRESIMS Calcd for  $[\text{C}_{34}\text{H}_{38}\text{N}_2\text{NaO}_2\text{S}]^+$  ( $\text{M} + \text{Na}^+$ ) 561.2546, found 561.2544.

***N*-(1-cyclohexyl-4-(4-(dimethylamino)phenyl)but-3-yn-2-yl)-*N*-((3-fluorophenyl)ethynyl)-4-methylbenzenesulfonamide (1w)**

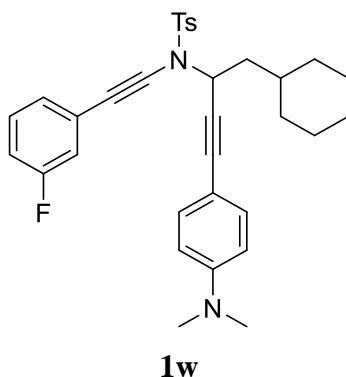

Pale yellow oil (82%, 445.3 mg), (eluent: PE/EtOAc = 8/1).  $^1\text{H}$  NMR (500 MHz,  $\text{CDCl}_3$ )  $\delta$  7.89 (d,  $J = 8.5$  Hz, 2H), 7.27 (d,  $J = 8.0$  Hz, 2H), 7.23 – 7.19 (m, 1H), 7.16 (d,  $J = 8.0$  Hz, 1H), 7.09 – 7.03 (m, 1H), 6.97 – 6.93 (m, 3H), 6.52 (d,  $J = 9.0$  Hz, 2H), 4.99 (dd,  $J = 8.5, 6.5$  Hz, 1H), 2.93 (s, 6H), 2.35 (s, 3H), 1.92 – 1.84 (m, 2H), 1.80 – 1.50 (m, 7H), 1.26 – 1.10 (m, 2H), 1.05 – 0.89 (m, 2H);  $^{13}\text{C}$  NMR (125 MHz,  $\text{CDCl}_3$ )  $\delta$  162.3 (d,  $J = 245.0$  Hz), 150.1, 144.6, 134.6, 132.6, 129.7 (d,  $J = 8.8$  Hz), 129.4, 128.1, 127.2 (d,  $J = 3.0$  Hz), 124.9 (d,  $J = 9.7$  Hz), 118.0 (d,  $J = 22.7$  Hz), 114.8 (d,  $J = 21.2$  Hz), 111.4, 108.8, 86.7, 82.6, 81.2, 71.9 (d,  $J = 3.4$  Hz), 51.6, 42.2, 40.1, 33.8, 33.1, 32.5, 26.4, 26.1, 25.9, 21.5;  $^{19}\text{F}$  NMR (376 MHz,  $\text{CDCl}_3$ )  $\delta$  -113.2 – -113.4 (m); IR (neat): 2920, 2850, 2230(s), 1609, 1523, 1370, 1165, 1113, 815; HRESIMS Calcd for  $[\text{C}_{33}\text{H}_{35}\text{FN}_2\text{NaO}_2\text{S}]^+$  ( $\text{M} + \text{Na}^+$ ) 565.2295, found 565.2288.

***N*-((3-chlorophenyl)ethynyl)-*N*-(1-cyclohexyl-4-(4-(dimethylamino)phenyl)but-3-yn-2-yl)-4-methylbenzenesulfonamide (1x)**

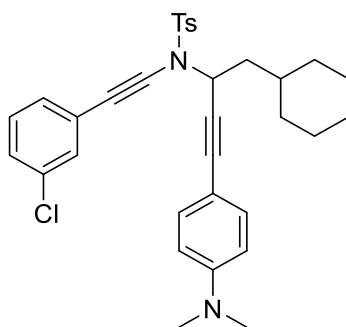

**1x**

Pale yellow oil (76%, 424.8 mg), (eluent: PE/EtOAc = 8/1).  $^1\text{H NMR}$  (500 MHz,  $\text{CDCl}_3$ )  $\delta$  7.89 (d,  $J = 8.0$  Hz, 2H), 7.34 (s, 1H), 7.30 – 7.18 (m, 5H), 6.95 (d,  $J = 9.0$  Hz, 2H), 6.51 (d,  $J = 8.5$  Hz, 2H), 4.99 (dd,  $J = 8.5, 7.0$  Hz, 1H), 2.92 (s, 6H), 2.34 (s, 3H), 1.94 – 1.83 (m, 2H), 1.81 – 1.46 (m, 6H), 1.27 – 1.09 (m, 3H), 1.06 – 0.88 (m, 2H);  $^{13}\text{C NMR}$  (125 MHz,  $\text{CDCl}_3$ )  $\delta$  150.0, 144.6, 134.6, 133.9, 132.6, 131.0, 129.4, 129.4, 129.4, 128.1, 127.8, 124.8, 111.4, 108.8, 86.7, 82.5, 81.5, 71.7, 51.7, 42.2, 40.0, 33.8, 33.1, 32.5, 26.4, 26.0, 25.9, 21.5; IR (neat): 2922, 2850, 2231(s), 1609, 1520, 1363, 1293, 1186, 1019, 815; HRESIMS Calcd for  $[\text{C}_{33}\text{H}_{35}\text{ClN}_2\text{KO}_2\text{S}]^+$  ( $\text{M} + \text{K}^+$ ) 597.1739, found 597.1732.

***N*-((3-bromophenyl)ethynyl)-*N*-(1-cyclohexyl-4-(4-(dimethylamino)phenyl)but-3-yn-2-yl)-4-methylbenzenesulfonamide (1y)**

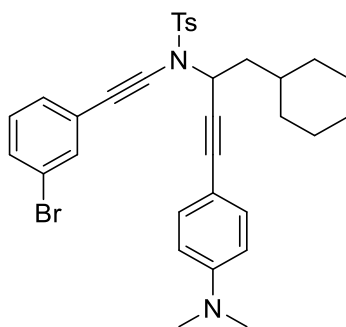

**1y**

Pale yellow oil (66%, 398.6 mg), (eluent: PE/EtOAc = 8/1).  $^1\text{H NMR}$  (500 MHz,  $\text{CDCl}_3$ )  $\delta$  7.89 (d,  $J = 8.0$  Hz, 2H), 7.51 – 7.49 (m, 1H), 7.38 (d,  $J = 8.0$  Hz, 1H), 7.32 – 7.25 (m, 3H), 7.16 – 7.11 (m, 1H), 6.96 (d,  $J = 9.0$  Hz, 2H), 6.52 (d,  $J = 9.0$  Hz, 2H), 4.98 (dd,  $J = 8.5, 6.5$  Hz, 1H), 2.93 (s, 6H), 2.35 (s, 3H), 1.93 – 1.83 (m, 2H), 1.80 – 1.58 (m, 6H), 1.27 – 1.10 (m, 3H), 1.07 – 0.90 (m, 2H);  $^{13}\text{C NMR}$  (125 MHz,  $\text{CDCl}_3$ )  $\delta$

150.1, 144.6, 134.6, 134.0, 132.6, 130.7, 129.9, 129.6, 129.5, 128.1, 125.1, 122.0, 111.5, 108.9, 86.8, 82.6, 81.6, 71.6, 51.7, 42.2, 40.1, 33.8, 33.1, 32.5, 26.4, 26.1, 26.0, 21.6; IR (neat): 2925, 2850, 2230(s), 1608, 1519, 1364, 1315, 1188, 815; HRESIMS Calcd for  $[C_{33}H_{35}BrN_2NaO_2S]^+$  ( $M + Na^+$ ) 625.1495, found 625.1501.

***N*-((4-chlorophenyl)ethynyl)-*N*-(1-cyclohexyl-4-(4-(dimethylamino)phenyl)but-3-yn-2-yl)-4-methylbenzenesulfonamide (**1z**)**

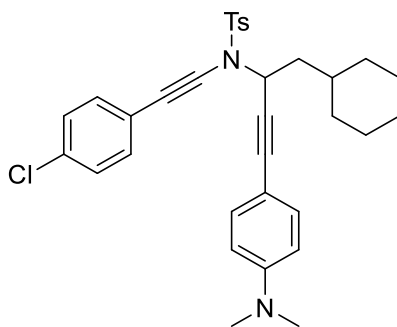

**1z**

Pale yellow oil (80%, 447.2 mg), (eluent: PE/EtOAc = 8/1).  $^1H$  NMR (500 MHz,  $CDCl_3$ )  $\delta$  7.89 (d,  $J = 8.5$  Hz, 2H), 7.31 – 7.22 (m, 6H), 6.94 (d,  $J = 9.0$  Hz, 2H), 6.52 (d,  $J = 9.0$  Hz, 2H), 4.98 (dd,  $J = 8.5, 6.5$  Hz, 1H), 2.94 (s, 6H), 2.35 (s, 3H), 1.94 – 1.82 (m, 2H), 1.78 – 1.56 (m, 6H), 1.28 – 1.09 (m, 3H), 1.05 – 0.91 (m, 2H);  $^{13}C$  NMR (125 MHz,  $CDCl_3$ )  $\delta$  150.1, 144.5, 134.6, 133.6, 132.7, 132.6, 129.4, 128.5, 128.2, 121.6, 111.4, 108.9, 86.7, 82.7, 81.1, 71.8, 51.7, 42.2, 40.1, 33.8, 33.1, 32.5, 26.4, 26.1, 26.0, 21.6; IR (neat): 2922, 2850, 2229(s), 1610, 1521, 1291, 1188, 1014, 817; HRESIMS Calcd for  $[C_{33}H_{35}ClKN_2O_2S]^+$  ( $M + K^+$ ) 597.1739, found 597.1731.

***N*-((4-bromophenyl)ethynyl)-*N*-(1-cyclohexyl-4-(4-(dimethylamino)phenyl)but-3-yn-2-yl)-4-methylbenzenesulfonamide (**1aa**)**

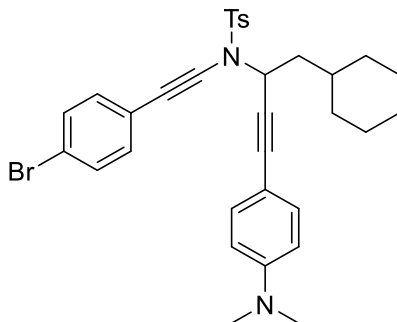

### 1aa

Pale yellow oil (75%, 453.2 mg), (eluent: PE/EtOAc = 8/1).  $^1\text{H}$  NMR (500 MHz,  $\text{CDCl}_3$ )  $\delta$  7.88 (d,  $J = 8.0$  Hz, 2H), 7.39 (d,  $J = 8.5$  Hz, 2H), 7.28 – 7.21 (m, 4H), 6.94 (d,  $J = 8.5$  Hz, 2H), 6.51 (d,  $J = 8.5$  Hz, 2H), 4.98 (dd,  $J = 8.5, 6.5$  Hz, 1H), 2.93 (s, 6H), 2.35 (s, 3H), 1.93 – 1.83 (m, 2H), 1.80 – 1.45 (m, 7H), 1.26 – 1.11 (m, 2H), 1.05 – 0.87 (m, 2H);  $^{13}\text{C}$  NMR (125 MHz,  $\text{CDCl}_3$ )  $\delta$  150.1, 144.6, 134.6, 132.9, 132.6, 131.4, 129.4, 128.1, 122.2, 121.7, 111.4, 108.9, 86.7, 82.6, 81.3, 71.9, 51.7, 42.2, 40.1, 33.8, 33.1, 32.5, 26.4, 26.1, 26.0, 21.6; IR (neat): 2924, 2849, 2228(s), 1610, 1521, 1316, 1190, 815; HRESIMS Calcd for  $[\text{C}_{33}\text{H}_{35}\text{BrN}_2\text{NaO}_2\text{S}]^+$  ( $\text{M} + \text{Na}^+$ ) 625.1495, found 625.1499.

### *N*-(1-cyclohexyl-4-(4-(dimethylamino)phenyl)but-3-yn-2-yl)-4-methyl-*N*-((4-(trifluoromethyl)phenyl)ethynyl)benzenesulfonamide (1ab)

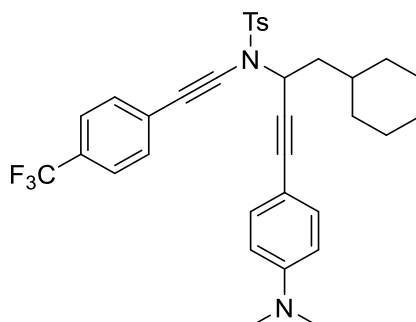

### 1ab

Pale yellow oil (84%, 498.3 mg), (eluent: PE/EtOAc = 8/1).  $^1\text{H}$  NMR (500 MHz,  $\text{CDCl}_3$ )  $\delta$  7.90 (d,  $J = 8.0$  Hz, 2H), 7.52 (d,  $J = 8.5$  Hz, 2H), 7.46 (d,  $J = 8.5$  Hz, 2H), 7.27 (d,  $J = 8.0$  Hz, 2H), 6.95 (d,  $J = 9.0$  Hz, 2H), 6.52 (d,  $J = 9.0$  Hz, 2H), 5.00 (dd,  $J = 8.5, 6.5$  Hz, 1H), 2.94 (s, 6H), 2.35 (s, 3H), 1.96 – 1.82 (m, 2H), 1.79 – 1.57 (m, 6H), 1.31 – 1.11 (m, 3H), 1.06 – 0.87 (m, 2H);  $^{13}\text{C}$  NMR (125 MHz,  $\text{CDCl}_3$ )  $\delta$  150.1, 144.7, 134.6, 132.6, 131.2, 129.5, 128.2, 126.0 (q,  $J = 252.7$  Hz), 125.1 (q,  $J = 3.6$  Hz), 111.4, 108.8, 86.8, 82.9, 82.5, 72.2, 51.8, 42.3, 40.1, 33.8, 33.1, 32.5, 26.4, 26.1, 26.0, 21.6;  $^{19}\text{F}$  NMR (376 MHz,  $\text{CDCl}_3$ )  $\delta$  -62.7 (s); IR (neat): 2924, 2851, 2224(s), 1609, 1522, 1405, 1187, 1168, 1104, 815; HRESIMS Calcd for  $[\text{C}_{34}\text{H}_{35}\text{F}_3\text{N}_2\text{NaO}_2\text{S}]^+$  ( $\text{M} + \text{Na}^+$ ) 615.2264, found 615.2261.

***N*-(1-cyclohexyl-4-(4-(dimethylamino)phenyl)but-3-yn-2-yl)-*N*-(hex-1-yn-1-yl)-4-methylbenzenesulfonamide (1ac)**

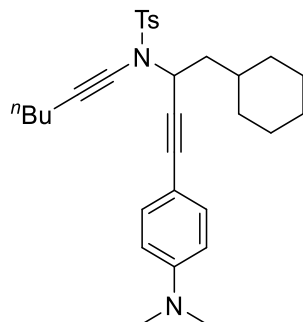

**1ac**

Pale yellow oil (53%, 267.6 mg), (eluent: PE/EtOAc = 10/1). <sup>1</sup>H NMR (500 MHz, CDCl<sub>3</sub>) δ 7.86 (d, *J* = 8.5 Hz, 2H), 7.24 (d, *J* = 8.0 Hz, 2H), 6.92 (d, *J* = 9.0 Hz, 2H), 6.52 (d, *J* = 9.0 Hz, 2H), 4.89 (dd, *J* = 9.0, 6.5 Hz, 1H), 2.94 (s, 6H), 2.35 (s, 3H), 2.30 (t, *J* = 7.0 Hz, 2H), 1.92 – 1.78 (m, 2H), 1.76 – 1.62 (m, 5H), 1.58 – 1.50 (m, 1H), 1.48 – 1.34 (m, 4H), 1.31 – 1.22 (m, 2H), 1.20 – 1.11 (m, 1H), 1.04 – 0.88 (m, 2H), 0.84 (t, *J* = 7.0 Hz, 3H); <sup>13</sup>C NMR (125 MHz, CDCl<sub>3</sub>) δ 145.0, 144.0, 134.8, 132.6, 129.1, 128.2, 111.4, 109.3, 86.1, 83.1, 72.3, 70.5, 51.0, 41.9, 40.1, 33.7, 33.2, 32.4, 31.0, 26.5, 26.1, 26.0, 21.6, 21.5, 18.2, 13.5; IR (neat): 2925, 2852, 2251, 2220(s), 1609, 1521, 1363, 1187, 1167, 1091, 814; HRESIMS Calcd for [C<sub>31</sub>H<sub>40</sub>N<sub>2</sub>NaO<sub>2</sub>S]<sup>+</sup> (M + Na<sup>+</sup>) 527.2703, found 527.2692.

***N*-(1-cyclohexyl-4-(4-methoxyphenyl)but-3-yn-2-yl)-*N*-((2,6-dimethylphenyl)ethynyl)-4-methylbenzenesulfonamide (1ad)**

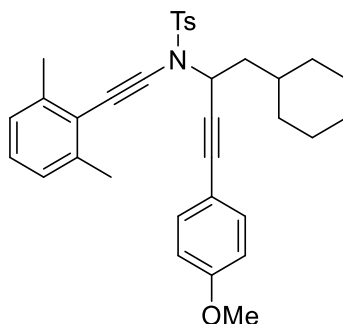

**1ad**

Pale yellow oil (85%, 459.2 mg), (eluent: PE/EtOAc = 5/1). <sup>1</sup>H NMR (500 MHz, CDCl<sub>3</sub>) δ 7.92 (d, *J* = 8.0 Hz, 2H), 7.24 (d, *J* = 8.0 Hz, 2H), 7.09 – 7.03 (m, 1H), 7.03 – 6.99

(m, 2H), 6.97 (d,  $J = 8.5$  Hz, 2H), 6.73 (d,  $J = 9.0$  Hz, 2H), 5.03 (dd,  $J = 9.0, 6.5$  Hz, 1H), 3.76 (s, 3H), 2.39 (s, 6H), 2.32 (s, 3H), 2.02 – 1.86 (m, 2H), 1.80 – 1.60 (m, 6H), 1.34 – 1.13 (m, 3H), 1.07 – 0.90 (m, 2H);  $^{13}\text{C}$  NMR (125 MHz,  $\text{CDCl}_3$ )  $\delta$  159.5, 144.5, 139.8, 134.7, 132.9, 129.4, 128.2, 127.1, 126.5, 122.8, 114.2, 113.6, 87.9, 85.3, 83.9, 70.4, 55.2, 51.3, 41.9, 33.7, 33.2, 32.3, 26.4, 26.1, 25.9, 21.5, 21.2; IR (neat): 2930, 2855, 2230(s), 1609, 1520, 1366, 1189, 1165, 1087, 815; HRESIMS Calcd for  $[\text{C}_{34}\text{H}_{37}\text{NNaO}_3\text{S}]^+$  ( $\text{M} + \text{Na}^+$ ) 562.2386, found 562.2379.

***N*-(1-cyclohexyl-4-(4-(dimethylamino)phenyl)but-3-yn-2-yl)-4-methyl-*N*-((triisopropylsilyl)ethynyl)benzenesulfonamide (1ae)**

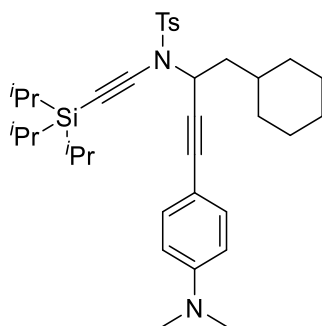

**1ae**

Pale yellow oil (50%, 302.5 mg), (eluent: PE/EtOAc = 10/1).  $^1\text{H}$  NMR (600 MHz,  $\text{CDCl}_3$ )  $\delta$  7.87 (d,  $J = 7.8$  Hz, 2H), 7.21 (d,  $J = 7.8$  Hz, 2H), 6.90 (d,  $J = 8.4$  Hz, 2H), 6.51 (d,  $J = 9.0$  Hz, 2H), 4.90 (dd,  $J = 9.6, 6.0$  Hz, 1H), 2.95 (s, 6H), 2.33 (s, 3H), 1.94 – 1.81 (m, 2H), 1.75 – 1.62 (m, 5H), 1.58 – 1.50 (m, 1H), 1.34 – 1.22 (m, 3H), 1.19 – 1.12 (m, 1H), 1.04 (s, 18H), 1.03 – 0.79 (m, 4H);  $^{13}\text{C}$  NMR (150 MHz,  $\text{CDCl}_3$ )  $\delta$  149.9, 144.3, 134.6, 132.6, 129.2, 128.3, 111.4, 109.3, 93.8, 86.3, 82.8, 71.5, 51.1, 41.9, 40.2, 33.6, 33.3, 32.2, 26.5, 26.1, 25.9, 21.5, 18.6(0), 18.5(9), 11.3; IR (neat): 2930, 2855, 2229(s), 1609, 1520, 1365, 1130, 816, 583; HRESIMS Calcd for  $[\text{C}_{36}\text{H}_{52}\text{KN}_2\text{O}_2\text{SSi}]^+$  ( $\text{M} + \text{K}^+$ ) 643.3150, found 643.3158.

***N*-(1-cyclopentyl-4-(4-(dimethylamino)phenyl)but-3-yn-2-yl)-*N*-((2,6-dimethylphenyl)ethynyl)-4-methylbenzenesulfonamide (1af)**

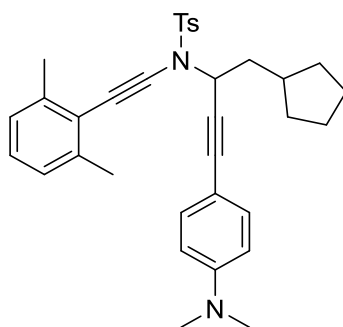

**1af**

Pale yellow oil (88%, 474.3 mg), (eluent: PE/EtOAc = 8/1).  $^1\text{H}$  NMR (500 MHz,  $\text{CDCl}_3$ )  $\delta$  7.92 (d,  $J = 8.5$  Hz, 2H), 7.24 (d,  $J = 8.0$  Hz, 2H), 7.07 – 6.98 (m, 3H), 6.91 (d,  $J = 9.0$  Hz, 2H), 6.50 (d,  $J = 9.0$  Hz, 2H), 4.95 (dd,  $J = 8.5, 6.0$  Hz, 1H), 2.93 (s, 6H), 2.39 (s, 6H), 2.34 (s, 3H), 2.16 – 2.05 (m, 2H), 1.99 – 1.83 (m, 3H), 1.67 – 1.54 (m, 4H), 1.23 – 1.13 (m, 2H);  $^{13}\text{C}$  NMR (125 MHz,  $\text{CDCl}_3$ )  $\delta$  150.0, 144.4, 139.8, 134.8, 132.6, 129.4, 128.1, 127.0, 126.5, 122.9, 111.4, 109.0, 88.2, 86.5, 82.9, 70.4, 53.3, 41.0, 40.1, 36.5, 32.5, 32.1, 25.1, 25.0, 21.5, 21.2; IR (neat): 2948, 2864, 2229(s), 1609, 1521, 1468, 1367, 1226, 1170, 1069; HRESIMS Calcd for  $[\text{C}_{34}\text{H}_{38}\text{N}_2\text{NaO}_2\text{S}]^+$  ( $\text{M} + \text{Na}^+$ ) 561.2546, found 561.2551.

***N*-(1-cycloheptyl-4-(4-(dimethylamino)phenyl)but-3-yn-2-yl)-*N*-((2,6-dimethylphenyl)ethynyl)-4-methylbenzenesulfonamide (1ag)**

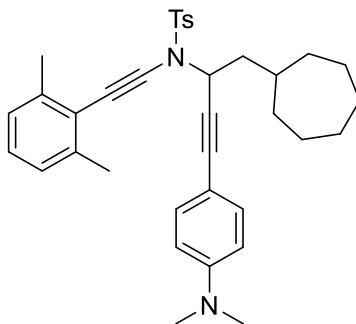

**1ag**

Pale yellow oil (80%, 453.4 mg), (eluent: PE/EtOAc = 8/1).  $^1\text{H}$  NMR (500 MHz,  $\text{CDCl}_3$ )  $\delta$  7.92 (d,  $J = 8.5$  Hz, 2H), 7.24 (d,  $J = 8.0$  Hz, 2H), 7.10 – 6.96 (m, 3H), 6.91 (d,  $J = 9.0$  Hz, 2H), 6.50 (d,  $J = 9.0$  Hz, 2H), 5.00 (dd,  $J = 9.0, 6.0$  Hz, 1H), 2.93 (s, 6H), 2.39 (s, 6H), 2.34 (s, 3H), 2.04 – 1.93 (m, 1H), 1.90 – 1.78 (m, 3H), 1.74 – 1.54 (m, 5H), 1.52 – 1.43 (m, 4H), 1.33 – 1.22 (m, 2H);  $^{13}\text{C}$  NMR (125MHz,  $\text{CDCl}_3$ )  $\delta$  150.0, 144.4,

139.8, 134.8, 132.6, 129.4, 128.1, 127.0, 126.5, 122.9, 111.4, 109.0, 88.1, 86.5, 82.9, 70.3, 52.2, 42.6, 40.1, 35.1, 34.6, 33.6, 28.6, 28.5, 26.2, 26.0, 21.5, 21.2; IR (neat): 2921, 2853, 2231(s), 1609, 1522, 1461, 1445, 1364, 1187, 1168; HRESIMS Calcd for  $[C_{36}H_{42}N_2NaO_2S]^+$  (M + Na<sup>+</sup>) 589.2859, found 589.2851.

***N*-(1-cyclooctyl-4-(4-(dimethylamino)phenyl)but-3-yn-2-yl)-*N*-((2,6-dimethylphenyl)ethynyl)-4-methylbenzenesulfonamide (1ah)**

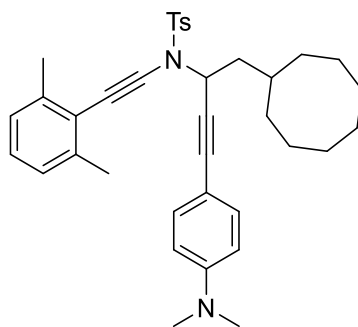

**1ah**

Pale yellow oil (82%, 476.3 mg), (eluent: PE/EtOAc = 8/1). <sup>1</sup>H NMR (500 MHz, CDCl<sub>3</sub>) δ 7.93 (d, *J* = 8.5 Hz, 2H), 7.25 (d, *J* = 8.0 Hz, 2H), 7.08 – 7.02 (m, 1H), 6.99 (d, *J* = 7.5 Hz, 2H), 6.91 (d, *J* = 9.0 Hz, 2H), 6.50 (d, *J* = 8.5 Hz, 2H), 5.01 (dd, *J* = 9.0, 6.5 Hz, 1H), 2.93 (s, 6H), 2.38 (s, 6H), 2.34 (s, 3H), 1.99 – 1.74 (m, 4H), 1.71 – 1.47 (m, 11H), 1.41 – 1.31 (m, 2H); <sup>13</sup>C NMR (125 MHz, CDCl<sub>3</sub>) δ 150.0, 144.4, 139.9, 134.9, 132.6, 129.4, 128.2, 127.0, 126.5, 122.9, 111.4, 109.1, 88.2, 86.5, 82.9, 70.3, 52.2, 42.4, 40.1, 33.3, 32.2, 31.1, 27.3(4), 27.2(5), 26.3, 25.1, 21.6, 21.2; IR (neat): 2918, 2853, 2229(s), 1608, 1522, 1468, 1445, 1364, 1187, 1168; HRESIMS Calcd for  $[C_{37}H_{44}N_2NaO_2S]^+$  (M + Na<sup>+</sup>) 603.3016, found 603.3024.

***N*-(1-cyclododecyl-4-(4-(dimethylamino)phenyl)but-3-yn-2-yl)-*N*-((2,6-dimethylphenyl)ethynyl)-4-methylbenzenesulfonamide (1ai)**



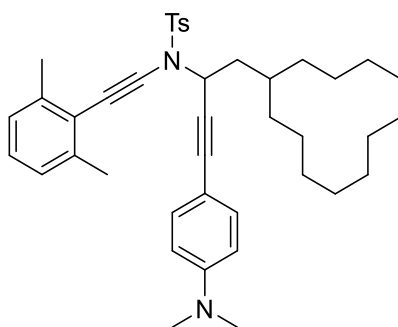

**1ai**

Pale yellow oil (73%, 465.3 mg), (eluent: PE/EtOAc = 8/1).  $^1\text{H}$  NMR (400 MHz,  $\text{CDCl}_3$ )  $\delta$  7.93 (d,  $J = 8.0$  Hz, 2H), 7.26 (d,  $J = 8.0$  Hz, 2H), 7.08 – 6.97 (m, 3H), 6.92 (d,  $J = 8.8$  Hz, 2H), 6.51 (d,  $J = 8.8$  Hz, 2H), 5.02 (dd,  $J = 8.4, 6.4$  Hz, 1H), 2.94 (s, 6H), 2.38 (s, 6H), 2.36 (s, 3H), 1.92 – 1.82 (m, 2H), 1.45 – 1.26 (m, 23H);  $^{13}\text{C}$  NMR (100 MHz,  $\text{CDCl}_3$ )  $\delta$  150.0, 144.4, 139.9, 134.9, 132.6, 129.4, 128.2, 126.9, 126.5, 122.9, 111.4, 109.1, 88.2, 86.6, 82.9, 77.3, 70.4, 52.3, 40.2, 39.8, 30.4, 29.0, 28.5, 24.6(4), 24.6(2), 24.1, 23.4, 23.3(1), 23.2(7), 23.1, 21.7, 21.6, 21.4, 21.2; IR (neat): 2930, 2859, 2229(s), 1608, 1522, 1470, 1445, 1363, 1186, 1168; HRESIMS Calcd for  $[\text{C}_{41}\text{H}_{52}\text{N}_2\text{NaO}_2\text{S}]^+$  ( $\text{M} + \text{Na}^+$ ) 659.3642, found 659.3647.

***N*-(1-cyclopentadecyl-4-(4-(dimethylamino)phenyl)but-3-yn-2-yl)-*N*-((2,6-dimethylphenyl)ethynyl)-4-methylbenzenesulfonamide (1aj)**

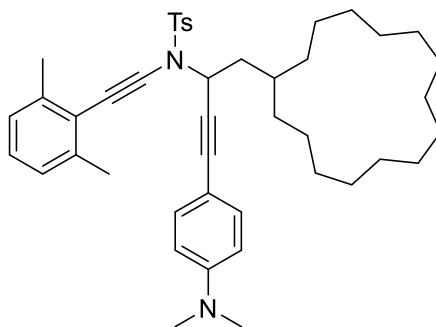

**1aj**

Pale yellow oil (79%, 536.4 mg), (eluent: PE/EtOAc = 8/1).  $^1\text{H}$  NMR (400 MHz,  $\text{CDCl}_3$ )  $\delta$  7.92 (d,  $J = 8.4$  Hz, 2H), 7.24 (d,  $J = 8.0$  Hz, 2H), 7.09 – 6.95 (m, 3H), 6.92 (d,  $J = 9.2$  Hz, 2H), 6.50 (d,  $J = 8.8$  Hz, 2H), 5.01 (dd,  $J = 8.4, 7.2$  Hz, 1H), 2.92 (s, 6H), 2.39 (s, 6H), 2.34 (s, 3H), 2.00 – 1.80 (m, 2H), 1.79 – 1.64 (m, 1H), 1.41 – 1.25 (m, 28H);  $^{13}\text{C}$  NMR (100 MHz,  $\text{CDCl}_3$ )  $\delta$  150.0, 144.4, 139.8, 134.9, 132.6, 129.4, 128.2, 126.9,

126.4, 122.9, 111.4, 109.1, 88.2, 86.6, 82.9, 70.4, 52.3, 40.1, 32.9, 32.3, 31.6, 27.5(3), 27.4(8), 27.0, 26.9, 26.8, 26.7, 26.6, 26.5, 24.4, 24.2, 21.5, 21.2; IR (neat): 2931, 2860, 2230(s), 1610, 1521, 1474, 1450, 1362, 1181, 1166, 816; HRESIMS Calcd for  $[C_{44}H_{58}N_2NaO_2S]^+$  ( $M + Na^+$ ) 701.4111, found 701.4108.

***N*-(4-(4-(dimethylamino)phenyl)-1-(1,4-dioxaspiro[4.5]decan-8-yl)but-3-yn-2-yl)-*N*-((2,6-dimethylphenyl)ethynyl)-4-methylbenzenesulfonamide (1ak)**

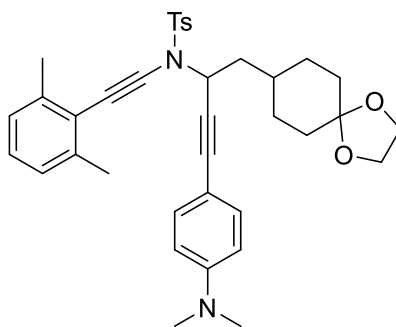

**1ak**

Pale yellow oil (75%, 458.2 mg), (eluent: PE/EtOAc = 8/1).  $^1H$  NMR (500 MHz,  $CDCl_3$ )  $\delta$  7.92 (d,  $J = 8.0$  Hz, 2H), 7.25 (d,  $J = 7.5$  Hz, 2H), 7.11 – 7.03 (m, 1H), 7.00 (d,  $J = 7.5$  Hz, 2H), 6.91 (d,  $J = 9.0$  Hz, 2H), 6.50 (d,  $J = 9.0$  Hz, 2H), 5.01 (dd,  $J = 9.0, 6.0$  Hz, 1H), 3.93 (s, 4H), 2.93 (s, 6H), 2.39 (s, 6H), 2.34 (s, 3H), 2.09 – 1.91 (m, 2H), 1.89 – 1.48 (m, 7H), 1.42 – 1.27 (m, 2H);  $^{13}C$  NMR (125 MHz,  $CDCl_3$ )  $\delta$  150.0, 144.5, 139.8, 134.7, 132.6, 129.4, 128.1, 127.0, 126.5, 122.8, 111.4, 108.8, 87.9, 86.6, 82.7, 70.5, 64.2, 51.9, 41.0, 40.1, 34.3, 34.2, 32.5, 30.2, 29.2, 21.5, 21.2; IR (neat): 2927, 2229(s), 1608, 1522, 1467, 1446, 1363, 1187, 1169, 816; HRESIMS Calcd for  $[C_{37}H_{42}N_2NaO_4S]^+$  ( $M + Na^+$ ) 633.2757, found 633.2761.

***N*-(4-(4-(dimethylamino)phenyl)-1-(4,4-dimethylcyclohexyl)but-3-yn-2-yl)-*N*-((2,6-dimethylphenyl)ethynyl)-4-methylbenzenesulfonamide (1al)**

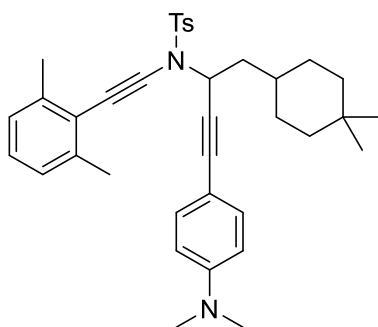

**1al**

Pale yellow oil (80%, 464.0 mg), (eluent: PE/EtOAc = 8/1).  $^1\text{H}$  NMR (500 MHz,  $\text{CDCl}_3$ )  $\delta$  7.92 (d,  $J = 8.5$  Hz, 2H), 7.24 (d,  $J = 9.0$  Hz, 2H), 7.08 – 6.96 (m, 3H), 6.91 (d,  $J = 8.5$  Hz, 2H), 6.50 (d,  $J = 9.0$  Hz, 2H), 5.03 (dd,  $J = 9.0, 6.0$  Hz, 1H), 2.93 (s, 6H), 2.39 (s, 6H), 2.34 (s, 3H), 2.04 – 1.96 (m, 1H), 1.84 – 1.68 (m, 2H), 1.60 – 1.09 (m, 10H), 0.90 (s, 3H), 0.87 (s, 3H);  $^{13}\text{C}$  NMR (125 MHz,  $\text{CDCl}_3$ )  $\delta$  150.0, 144.4, 139.9, 134.8, 132.6, 129.4, 128.2, 127.0, 126.5, 122.9, 111.4, 109.0, 88.1, 86.4, 82.9, 70.4, 51.8, 41.8, 40.1, 38.9, 38.7, 33.7, 32.6, 30.0, 29.0, 28.1, 24.5, 21.6, 21.2; IR (neat): 2917, 2850, 2231(s), 1609, 1522, 1467, 1446, 1363, 1187, 1170; HRESIMS Calcd for  $[\text{C}_{37}\text{H}_{45}\text{N}_2\text{O}_2\text{S}]^+$  ( $\text{M} + \text{H}^+$ ) 581.3196, found 581.3199.

***N*-((1*R*,3*S*,5*r*,7*r*)-adamantan-2-yl)-4-(4-(dimethylamino)phenyl)but-3-yn-2-yl)-*N*-((2,6-dimethylphenyl)ethynyl)-4-methylbenzenesulfonamide (1am)**

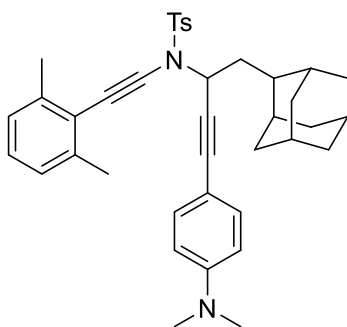

**1am**

Pale yellow oil (74%, 447.6 mg), (eluent: PE/EtOAc = 8/1).  $^1\text{H}$  NMR (500 MHz,  $\text{CDCl}_3$ )  $\delta$  7.92 (d,  $J = 6.5$  Hz, 2H), 7.25 (d,  $J = 7.5$  Hz, 2H), 7.10 – 6.97 (m, 3H), 6.93 (d,  $J = 7.0$  Hz, 2H), 6.51 (d,  $J = 7.5$  Hz, 2H), 5.00 – 4.91 (m, 1H), 2.94 (s, 6H), 2.39 (s, 6H), 2.35 (s, 3H), 2.17 – 2.08 (m, 2H), 2.06 – 1.98 (m, 1H), 1.91 – 1.73 (m, 12H), 1.58 – 1.53 (m, 2H);  $^{13}\text{C}$  NMR (125 MHz,  $\text{CDCl}_3$ )  $\delta$  150.0, 144.4, 139.9, 134.9, 132.6, 129.4,

128.2, 127.0, 126.5, 122.9, 111.4, 109.1, 88.2, 86.5, 83.1, 70.5, 52.4, 40.4, 40.1, 39.0, 38.9, 38.3, 37.8, 32.2, 31.9, 31.7, 31.0, 28.1, 27.9, 21.6, 21.2; IR (neat): 2906, 2851, 2230(s), 1608, 1522, 1470, 1445, 1366, 1187, 1167; HRESIMS Calcd for  $[C_{39}H_{44}N_2NaO_2S]^+$  (M + Na<sup>+</sup>) 627.3016, found 627.3020.

***N*-(1-(4-(dimethylamino)phenyl)-5-methylhex-1-yn-3-yl)-*N*-((2,6-dimethylphenyl)ethynyl)-4-methylbenzenesulfonamide (1an)**

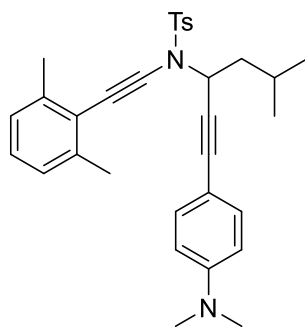

**1an**

Pale yellow oil (87%, 446.3 mg), (eluent: PE/EtOAc = 8/1). <sup>1</sup>H NMR (500 MHz, CDCl<sub>3</sub>) δ 7.92 (d, *J* = 8.0 Hz, 2H), 7.26 – 7.22 (m, 2H), 7.09 – 7.02 (m, 1H), 6.99 (d, *J* = 7.5 Hz, 2H), 6.91 (d, *J* = 8.5 Hz, 2H), 6.49 (d, *J* = 9.0 Hz, 2H), 5.01 (dd, *J* = 9.0, 6.5 Hz, 1H), 2.92 (s, 6H), 2.39 (s, 6H), 2.33 (s, 3H), 2.06 – 1.88 (m, 2H), 1.80 – 1.70 (m, 1H), 1.03 (d, *J* = 6.0 Hz, 3H), 0.99 (d, *J* = 6.0 Hz, 3H); <sup>13</sup>C NMR (125 MHz, CDCl<sub>3</sub>) δ 150.0, 144.4, 139.9, 134.7, 132.6, 129.4, 128.2, 127.0, 126.5, 122.8, 111.4, 108.9, 88.1, 86.5, 82.7, 70.3, 52.2, 43.5, 40.1, 24.5, 22.6, 21.7, 21.5, 21.2; IR (neat): 2923, 2850, 2230(s), 1608, 1522, 1446, 1372, 1170; HRESIMS Calcd for  $[C_{32}H_{36}N_2NaO_2S]^+$  (M + Na<sup>+</sup>) 535.2390, found 535.2385.

***N*-(1-(4-(dimethylamino)phenyl)-5-ethylhept-1-yn-3-yl)-*N*-((2,6-dimethylphenyl)ethynyl)-4-methylbenzenesulfonamide (1ao)**

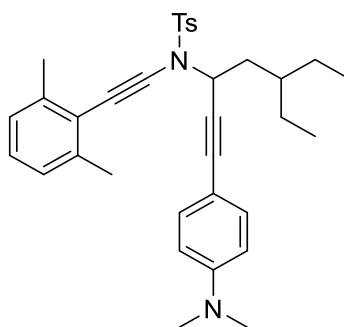

**1ao**

Pale yellow oil (87%, 470.6 mg), (eluent: PE/EtOAc = 8/1).  $^1\text{H NMR}$  (400 MHz,  $\text{CDCl}_3$ )  $\delta$  7.92 (d,  $J = 8.0$  Hz, 2H), 7.24 (d,  $J = 8.0$  Hz, 2H), 7.09 – 6.95 (m, 3H), 6.92 (d,  $J = 8.4$  Hz, 2H), 6.49 (d,  $J = 8.8$  Hz, 2H), 5.11 – 4.89 (m, 1H), 2.92 (s, 6H), 2.39 (s, 6H), 2.34 (s, 3H), 2.04 – 1.79 (m, 2H), 1.64 – 1.55 (m, 1H), 1.53 – 1.31 (m, 4H), 1.00 – 0.78 (m, 6H);  $^{13}\text{C NMR}$  (100 MHz,  $\text{CDCl}_3$ )  $\delta$  150.0, 144.4, 139.8, 134.9, 132.6, 129.4, 128.1, 126.9, 126.4, 122.9, 111.4, 109.0, 88.2, 86.6, 82.9, 70.4, 52.3, 40.1, 38.2, 36.5, 25.3, 24.7, 21.5, 21.2, 10.7, 10.3; IR (neat): 2922, 2850, 2230(s), 1609, 1522, 1445, 1372, 1170, 819; HRESIMS Calcd for  $[\text{C}_{34}\text{H}_{40}\text{N}_2\text{NaO}_2\text{S}]^+$  ( $\text{M} + \text{Na}^+$ ) 563.2703, found 563.2710.

***N*-(1-(4-(dimethylamino)phenyl)-5-propyloct-1-yn-3-yl)-*N*-((2,6-dimethylphenyl)ethynyl)-4-methylbenzenesulfonamide (1ap)**

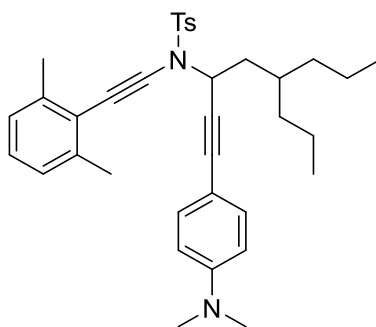

**1ap**

Pale yellow oil (85%, 482.3 mg), (eluent: PE/EtOAc = 8/1).  $^1\text{H NMR}$  (400 MHz,  $\text{CDCl}_3$ )  $\delta$  7.92 (d,  $J = 8.0$  Hz, 2H), 7.24 (d,  $J = 8.0$  Hz, 2H), 7.08 – 6.96 (m, 3H), 6.92 (d,  $J = 9.2$  Hz, 2H), 6.50 (d,  $J = 8.8$  Hz, 2H), 5.08 – 4.93 (m, 1H), 2.92 (s, 6H), 2.38 (s, 6H), 2.34 (s, 3H), 2.02 – 1.81 (m, 2H), 1.76 – 1.67 (m, 1H), 1.40 – 1.29 (m, 8H), 0.98 – 0.86 (m, 6H);  $^{13}\text{C NMR}$  (100 MHz,  $\text{CDCl}_3$ )  $\delta$  150.0, 144.4, 139.8, 134.9, 132.6, 129.4, 128.2,

126.9, 126.4, 122.9, 111.4, 109.0, 88.2, 86.6, 82.9, 70.5, 52.4, 40.1, 39.1, 35.8, 35.3, 33.5, 21.5, 21.2, 19.6, 19.3, 14.4; IR (neat): 2923, 2851, 2230(s), 1609, 1522, 1444, 1372, 1170, 815; HRESIMS Calcd for  $[C_{36}H_{44}N_2NaO_2S]^+$  ( $M + Na^+$ ) 591.3016, found 591.3021.

***N*-(1-(4-(dimethylamino)phenyl)-5,5-diphenylpent-1-yn-3-yl)-*N*-((2,6-dimethylphenyl)ethynyl)-4-methylbenzenesulfonamide (1aq)**

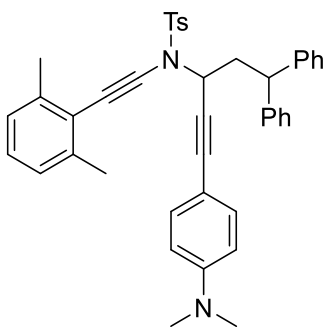

**1aq**

Pale yellow oil (81%, 515.6 mg), (eluent: PE/EtOAc = 8/1).  $^1H$  NMR (500 MHz,  $CDCl_3$ )  $\delta$  7.83 (d,  $J = 8.5$  Hz, 2H), 7.35 – 7.27 (m, 8H), 7.22 – 7.18 (m, 4H), 7.06 – 7.01 (m, 1H), 7.00 – 6.90 (m, 4H), 6.51 (d,  $J = 9.0$  Hz, 2H), 4.77 (dd,  $J = 8.0, 6.5$  Hz, 1H), 4.32 (t,  $J = 7.5$  Hz, 1H), 2.93 (s, 6H), 2.83 – 2.59 (m, 2H), 2.34 (s, 6H), 2.31 (s, 3H);  $^{13}C$  NMR (125 MHz,  $CDCl_3$ )  $\delta$  150.1, 144.5, 143.5, 143.2, 140.0, 134.6, 132.7, 129.4, 128.5(9), 128.5(7), 128.2(1), 128.1(8), 127.8, 127.1, 126.6, 126.4(7), 126.4(5), 122.7, 111.4, 108.8, 88.0, 87.4, 82.3, 70.6, 52.4, 47.2, 40.7, 40.1, 21.5, 21.2; IR (neat): 2923, 2850, 2230(s), 1609, 1523, 1444, 1362, 1113, 815; HRESIMS Calcd for  $[C_{42}H_{40}N_2NaO_2S]^+$  ( $M + Na^+$ ) 659.2703, found 659.2710.

***N*-(1-(4-(dimethylamino)phenyl)-5,7-dimethyloct-1-yn-3-yl)-*N*-((2,6-dimethylphenyl)ethynyl)-4-methylbenzenesulfonamide (1ar)**

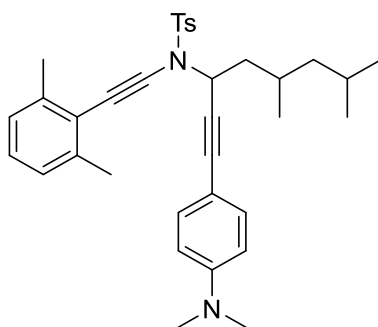

**1ar**

Prepared as a pale yellow oil (79%, 438.5 mg) with 1:1 dr (determined by  $^1\text{H}$  NMR analysis), (eluent: PE/EtOAc = 8/1).  $^1\text{H}$  NMR (500 MHz,  $\text{CDCl}_3$ )  $\delta$  7.92 (d,  $J$  = 8.5 Hz, 2H), 7.27 – 7.22 (m, 2H), 7.07 – 7.02 (m, 1H), 7.01 – 6.96 (m, 2H), 6.91 (t,  $J$  = 9.0 Hz, 2H), 6.54 – 6.46 (m, 2H), 5.08 – 4.97 (m, 1H), 2.92 (s, 6H), 2.39 (s, 6H), 2.36 – 2.30 (m, 3H), 2.20 – 1.92 (m, 1H), 1.85 – 1.58 (m, 2H), 1.56 – 1.22 (m, 3H), 1.06 – 0.93 (m, 3H), 0.91 – 0.87 (m, 3H), 0.87 – 0.80 (m, 3H);  $^{13}\text{C}$  NMR (125 MHz,  $\text{CDCl}_3$ )  $\delta$  149.9(9), 149.9(6), 144.4, 139.9, 139.7, 134.8, 134.8, 132.5(9), 132.5(5), 129.4, 129.3, 128.2, 128.1, 127.0, 126.9, 126.5, 122.9, 122.8, 111.4, 108.9, 88.3, 87.9, 86.7, 86.4, 83.0, 82.6, 70.5, 70.2, 52.4, 51.9, 41.8, 40.1, 36.0, 35.8, 34.6, 34.0, 29.7, 29.2, 28.2, 28.1, 22.7(1), 22.6(7), 22.5(4), 22.4(6), 21.5, 21.2, 19.7, 19.0; IR (neat): 2925, 2850, 2231(s), 1609, 1522, 1447, 1372, 1168, 815; HRESIMS Calcd for  $[\text{C}_{35}\text{H}_{42}\text{N}_2\text{NaO}_2\text{S}]^+$  ( $\text{M} + \text{Na}^+$ ) 577.2859, found 577.2866.

***N*--(1-(4-(dimethylamino)phenyl)-5-phenylpent-1-yn-3-yl)-*N*-((2,6-dimethylphenyl)ethynyl)-4-methylbenzenesulfonamide (1as)**

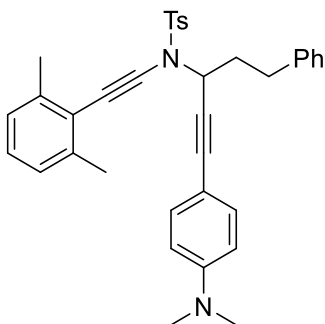

**1as**

Pale yellow oil (80%, 448.8 mg), (eluent: PE/EtOAc = 10/1).  $^1\text{H}$  NMR (400 MHz,  $\text{CDCl}_3$ )  $\delta$  7.90 (d,  $J$  = 8.4 Hz, 2H), 7.31 – 7.17 (m, 7H), 7.09 – 7.02 (m, 1H), 7.01 –

6.96 (m, 2H), 6.93 (d,  $J = 8.8$  Hz, 2H), 6.50 (d,  $J = 8.8$  Hz, 2H), 4.93 (dd,  $J = 8.4, 6.8$  Hz, 1H), 2.98 – 2.77 (m, 8H), 2.39 (s, 6H), 2.33 (s, 3H), 2.28 – 2.11 (m, 2H);  $^{13}\text{C}$  NMR (100 MHz,  $\text{CDCl}_3$ )  $\delta$  150.1, 144.5, 140.6, 139.9, 134.7, 132.6, 129.4, 128.6, 128.4, 128.2, 127.1, 126.5, 126.1, 122.8, 111.4, 108.8, 87.9, 87.1, 82.4, 70.5, 53.4, 40.1, 36.5, 32.0, 21.5, 21.2; IR (neat): 2922, 2851, 2230(s), 1608, 1510, 1446, 1366, 1168, 815; HRESIMS Calcd for  $[\text{C}_{36}\text{H}_{36}\text{N}_2\text{NaO}_2\text{S}]^+$  ( $\text{M} + \text{Na}^+$ ) 583.2390, found 583.2379.

***N*-(1-(4-(dimethylamino)phenyl)hept-1-yn-3-yl)-*N*-((2,6-dimethylphenyl)ethynyl)-4-methylbenzenesulfonamide (1at)**

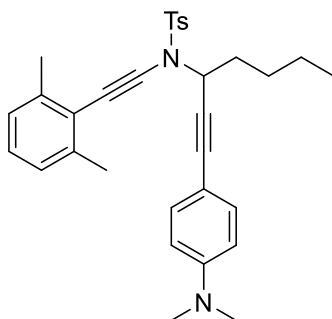

**1at**

Pale yellow oil (82%, 420.1 mg), (eluent: PE/EtOAc = 8/1).  $^1\text{H}$  NMR (400 MHz,  $\text{CDCl}_3$ )  $\delta$  7.91 (d,  $J = 8.4$  Hz, 2H), 7.24 (d,  $J = 8.0$  Hz, 2H), 7.06 – 6.96 (m, 3H), 6.93 (d,  $J = 8.8$  Hz, 2H), 6.49 (d,  $J = 8.8$  Hz, 2H), 4.91 (dd,  $J = 8.0, 6.8$  Hz, 1H), 2.91 (s, 6H), 2.39 (s, 6H), 2.33 (s, 3H), 2.08 – 1.85 (m, 2H), 1.59 – 1.47 (m, 2H), 1.44 – 1.32 (m, 2H), 0.93 (t,  $J = 7.2$  Hz, 3H);  $^{13}\text{C}$  NMR (100 MHz,  $\text{CDCl}_3$ )  $\delta$  150.0, 144.4, 139.8, 134.8, 132.6, 129.4, 128.1, 126.9, 126.4, 122.8, 111.4, 108.9, 88.1, 86.6, 82.7, 70.4, 53.8, 40.0, 34.5, 27.9, 22.0, 21.5, 21.1, 13.9; IR (neat): 2923, 2851, 2229(s), 1608, 1522, 1447, 1365, 1263, 1186, 815; HRESIMS Calcd for  $[\text{C}_{32}\text{H}_{36}\text{N}_2\text{NaO}_2\text{S}]^+$  ( $\text{M} + \text{Na}^+$ ) 535.2390, found 535.2395.

***N*-(1-cyclohexyl-3-(4-(dimethylamino)phenyl)prop-2-yn-1-yl)-*N*-((2,6-dimethylphenyl)ethynyl)-4-methylbenzenesulfonamide (1au)**



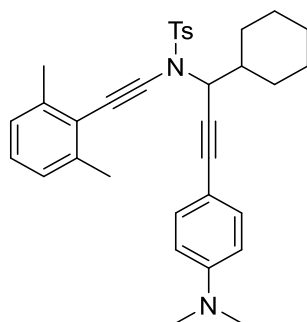

**1au**

Pale yellow oil (63%, 339.5 mg), (eluent: PE/EtOAc = 8/1).  $^1\text{H}$  NMR (500 MHz,  $\text{CDCl}_3$ )  $\delta$  7.91 (d,  $J = 8.0$  Hz, 2H), 7.25 (d,  $J = 8.0$  Hz, 2H), 7.07 – 6.95 (m, 3H), 6.92 (d,  $J = 8.5$  Hz, 2H), 6.49 (d,  $J = 8.5$  Hz, 2H), 4.61 (d,  $J = 10.0$  Hz, 1H), 2.92 (s, 6H), 2.37 (s, 6H), 2.34 (s, 3H), 2.18 – 2.07 (m, 2H), 1.96 – 1.62 (m, 4H), 1.32 – 1.08 (m, 5H);  $^{13}\text{C}$  NMR (125 MHz,  $\text{CDCl}_3$ )  $\delta$  150.0, 144.3, 139.9, 134.9, 132.6, 129.4, 128.1, 127.0, 126.4, 122.9, 111.4, 109.1, 88.4, 87.4, 82.0, 70.1, 59.3, 41.4, 40.1, 29.9, 29.6, 26.2, 25.9, 25.6, 21.5, 21.2; IR (neat): 2923, 2851, 2236(s), 1608, 1521, 1447, 1363, 1229, 1169, 815; HRESIMS Calcd for  $[\text{C}_{34}\text{H}_{38}\text{N}_2\text{NaO}_2\text{S}]^+$  ( $\text{M} + \text{Na}^+$ ) 561.2546, found 561.2552.

***N*-(5-cyclohexyl-1-(4-(dimethylamino)phenyl)pent-1-yn-3-yl)-*N*-((2,6-dimethylphenyl)ethynyl)-4-methylbenzenesulfonamide (1av)**

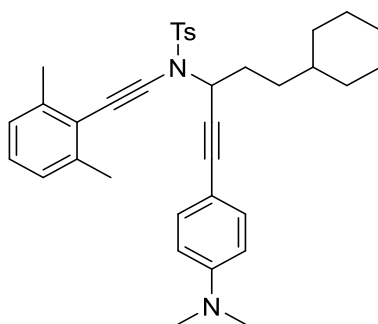

**1av**

Pale yellow oil (87%, 493.2 mg), (eluent: PE/EtOAc = 8/1).  $^1\text{H}$  NMR (500 MHz,  $\text{CDCl}_3$ )  $\delta$  7.91 (d,  $J = 8.0$  Hz, 2H), 7.25 (d,  $J = 8.5$  Hz, 2H), 7.08 – 7.02 (m, 1H), 7.02 – 6.97 (m, 2H), 6.93 (d,  $J = 9.0$  Hz, 2H), 6.51 (d,  $J = 8.5$  Hz, 2H), 4.86 (dd,  $J = 8.0, 7.0$  Hz, 1H), 2.94 (s, 6H), 2.38 (s, 6H), 2.35 (s, 3H), 2.07 – 1.90 (m, 2H), 1.74 – 1.61 (m, 5H), 1.48 – 1.36 (m, 2H), 1.25 – 1.08 (m, 4H), 0.95 – 0.85 (m, 2H);  $^{13}\text{C}$  NMR (125 MHz,  $\text{CDCl}_3$ )  $\delta$  150.1, 144.4, 139.9, 134.9, 132.7, 129.4, 128.2, 127.0, 126.5, 123.0, 111.4,

109.1, 88.1, 86.6, 82.9, 70.4, 54.3, 40.1, 37.2, 33.4, 33.3, 33.2, 32.4, 26.6, 26.3, 21.6, 21.2; IR (neat): 2924, 2852, 2230(s), 1609, 1522, 1446, 1363, 1187, 1168, 815; HRESIMS Calcd for  $[C_{36}H_{42}N_2NaO_2S]^+$  ( $M + Na^+$ ) 589.2859, found 589.2868.

***N*-(5-(benzyloxy)-1-(4-(dimethylamino)phenyl)pent-1-yn-3-yl)-*N*-((2,6-dimethylphenyl)ethynyl)-4-methylbenzenesulfonamide (1aw)**

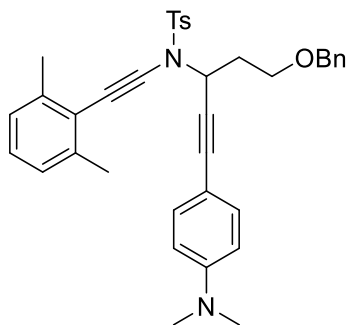

**1aw**

Pale yellow oil (82%, 484.4 mg), (eluent: PE/EtOAc = 8/1).  $^1H$  NMR (500 MHz,  $CDCl_3$ )  $\delta$  7.92 (d,  $J = 8.5$  Hz, 2H), 7.44 – 7.38 (m, 2H), 7.36 – 7.31 (m, 2H), 7.29 – 7.21 (m, 3H), 7.08 – 7.01 (m, 1H), 7.00 – 6.95 (m, 2H), 6.91 (d,  $J = 9.0$  Hz, 2H), 6.49 (d,  $J = 9.0$  Hz, 2H), 5.26 (dd,  $J = 8.5, 6.5$  Hz, 1H), 4.60 (d,  $J = 12.0$  Hz, 1H), 4.51 (d,  $J = 12.0$  Hz, 1H), 3.68 (t,  $J = 5.5$  Hz, 2H), 2.91 (s, 6H), 2.37 (s, 6H), 2.33 (s, 3H), 2.32 – 2.15 (m, 2H);  $^{13}C$  NMR (125 MHz,  $CDCl_3$ )  $\delta$  150.0, 144.5, 139.8, 138.2, 134.7, 132.6, 129.4, 128.3, 128.1, 127.7, 127.5, 127.0, 126.5, 122.7, 111.3, 108.8, 88.0, 86.8, 82.2, 73.2, 70.5, 65.9, 51.1, 40.0, 35.1, 21.5, 21.2; IR (neat): 2930, 2851, 2230(s), 1609, 1521, 1447, 1368, 1229, 1165, 819; HRESIMS Calcd for  $[C_{37}H_{38}N_2NaO_3S]^+$  ( $M + Na^+$ ) 613.2495, found 613.2488.

***N*-(1-cyclohexyl-4-(4-(dimethylamino)phenyl)but-3-yn-2-yl-2-d)-*N*-((2,6-dimethylphenyl)ethynyl)-4-methylbenzenesulfonamide (( $\pm$ )-[D]\*-1a)**

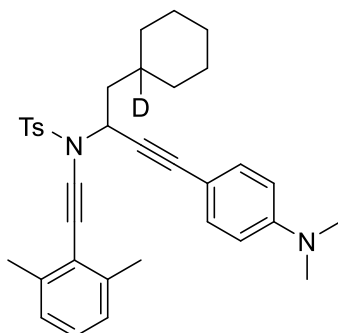

(±)-[D]\*-1a

Compound (±)-[D]\*-1a was prepared from 2-(cyclohexyl-1-*d*)ethan-1-ol<sup>4</sup> according to the general procedure. Pale yellow oil (78%, 431.4 mg), (eluent: PE/EtOAc = 8/1). <sup>1</sup>H NMR (500 MHz, CDCl<sub>3</sub>) δ 7.92 (d, *J* = 8.0 Hz, 2H), 7.24 (d, *J* = 8.0 Hz, 2H), 7.09 – 6.95 (m, 3H), 6.91 (d, *J* = 9.0 Hz, 2H), 6.49 (d, *J* = 9.0 Hz, 2H), 5.03 (dd, *J* = 9.0, 6.5 Hz, 1H), 2.92 (s, 6H), 2.39 (s, 6H), 2.33 (s, 3H), 2.00 – 1.86 (m, 2H), 1.78 – 1.64 (m, 5H), 1.30 – 1.10 (m, 3H), 1.06 – 0.89 (m, 2H); <sup>13</sup>C NMR (125 MHz, CDCl<sub>3</sub>) δ 150.0, 144.4, 139.8, 134.8, 132.6, 129.4, 128.2, 127.0, 126.5, 122.9, 111.4, 109.0, 88.1, 86.4, 82.9, 70.4, 51.6, 42.0, 40.1, 33.1, 32.2, 26.4, 26.1, 25.9, 21.5, 21.2; IR (neat): 2924, 2852, 2230(s), 1610, 1522, 1450, 1367, 1188, 1088; HRESIMS Calcd for [C<sub>35</sub>H<sub>39</sub>DN<sub>2</sub>NaO<sub>2</sub>S]<sup>+</sup> (M + Na<sup>+</sup>) 576.2765, found 576.2773.

***N*-(1-cyclohexyl-4-(4-(dimethylamino)phenyl)but-3-yn-2-yl-2-*d*)-*N*-((2,6-dimethylphenyl)ethynyl)-4-methylbenzenesulfonamide ((±)-[D]-1a)**

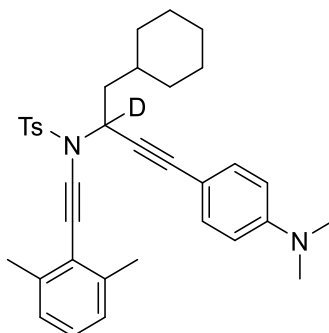

(±)-[D]-1a

Compound (±)-[D]-1a was prepared according to the known procedure<sup>3</sup>. Pale yellow oil (81%, 448.1 mg), (eluent: PE/EtOAc = 8/1). <sup>1</sup>H NMR (400 MHz, CDCl<sub>3</sub>) δ 7.92 (d, *J* = 8.0 Hz, 2H), 7.23 (d, *J* = 8.0 Hz, 2H), 7.10 – 6.94 (m, 3H), 6.91 (d, *J* = 9.2 Hz, 2H),

6.49 (d,  $J = 9.2$  Hz, 2H), 2.91 (s, 6H), 2.39 (s, 6H), 2.33 (s, 3H), 2.02 – 1.85 (m, 2H), 1.80 – 1.57 (m, 6H), 1.35 – 1.11 (m, 3H), 1.05 – 0.86 (m, 2H);  $^{13}\text{C}$  NMR (100 MHz,  $\text{CDCl}_3$ )  $\delta$  149.9, 144.4, 139.8, 134.7, 132.6, 129.3, 128.1, 126.9, 126.4, 122.8, 111.3, 108.9, 88.1, 86.4, 82.8, 70.3, 42.0, 40.0, 33.7, 33.2, 32.3, 26.4, 26.1, 25.9, 21.5, 21.2; IR (neat): 2923, 2850, 2230(s), 1610, 1522, 1447, 1187, 1169, 1090, 816; HRESIMS Calcd for  $[\text{C}_{35}\text{H}_{40}\text{DN}_2\text{O}_2\text{S}]^+$  ( $\text{M} + \text{H}^+$ ) 554.2946, found 554.2951.

### Synthesis of chiral substrate (-)-**1an**

To confirm the absolute configuration of (+)-**1** obtained through copper-catalyzed kinetic resolution, chiral substrate (-)-**1an** was prepared from a chiral starting material *L*-Valinol. We compared the optical rotation of (-)-**1an** and (+)-**1**, and assigned the absolute configuration of (+)-**1** to be *R*.

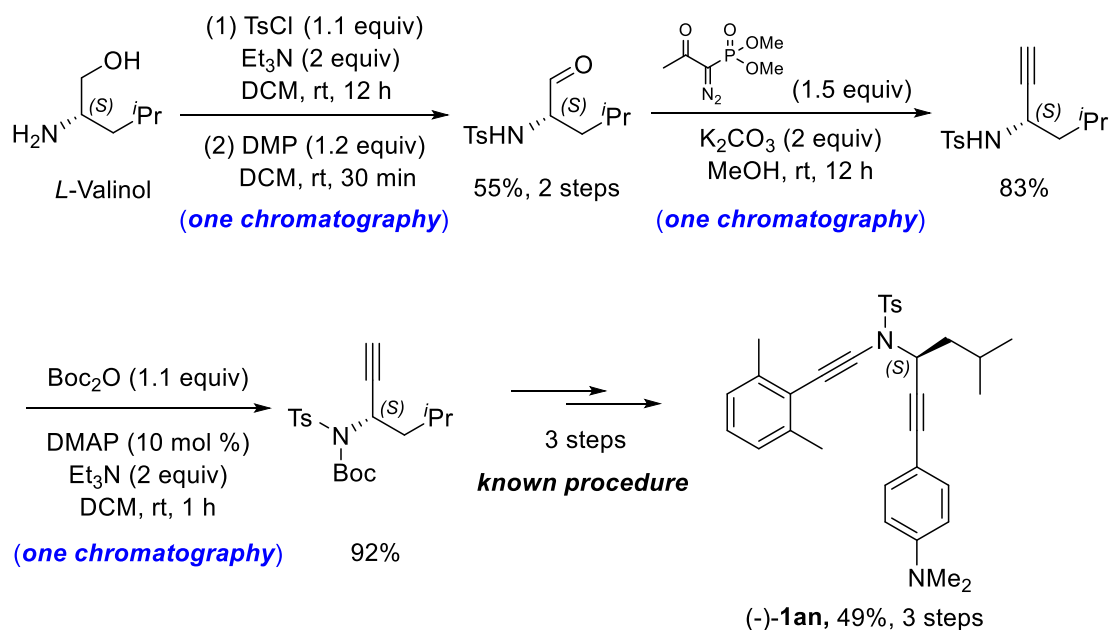

To the solution of *L*-Valinol (10 mmol, 1.1 mL) in DCM (50 mL) were added TsCl (11 mmol, 2.10 g) and Et<sub>3</sub>N (20 mmol, 2.8 mL), and the reaction was stirred at room temperature for 12 h. The progress of the reaction was monitored by TLC. Upon completion, the reaction was diluted with water and extracted with DCM (3 x 50 mL). The combined organic layers were dried over anhydrous MgSO<sub>4</sub> and concentrated under

vacuum. The crude Ts-protected *L*-Valinol was directly used in the next step without further purification.

To the solution of the crude Ts-protected *L*-Valinol (10 mmol) in DCM (50 mL) was added Dess Martin Periodinane (12 mmol, 5.09 g), and the reaction was stirred at room temperature for 30 min. The progress of the reaction was monitored by TLC. Upon completion, the reaction was quenched with aqueous NaHCO<sub>3</sub> and extracted with DCM (3 x 50 mL). The combined organic layer was dried over anhydrous MgSO<sub>4</sub> and concentrated under vacuum. The residue was purified by column chromatography on silica gel (eluent: hexanes/EtOAc) to afford the desired aldehyde (55%, 2 steps).

To the solution of the above aldehyde (5.5 mmol, 1.48 g), K<sub>2</sub>CO<sub>3</sub> (11 mmol, 1.52 g) in MeOH (30 mL) was added dimethyl (1-diazo-2-oxopropyl)phosphonate (8.5 mmol, 1.3 mL) dropwise at room temperature and stirred for additional 12 h. The progress of the reaction was monitored by TLC. Upon completion, the mixture was filtered through a pad of silica gel and the filtrate was concentrated under reduce pressure. The residue was purified by column chromatography on silica gel (eluent: hexanes/EtOAc) to give the desired alkyne (83% yield).

To the solution of the above alkyne (4.6 mmol, 1.21 g), DMAP (0.46 mmol, 55.8 mg) and Et<sub>3</sub>N (9.2 mmol, 1.3 mL) in DCM (30 mL) was added Boc<sub>2</sub>O (5 mmol, 1.2 mL) dropwise at room temperature and stirred for additional 1 h. The progress of the reaction was monitored by TLC. Upon completion, the reaction was quenched with HCl (1 M). The resulting mixture was extracted with DCM (3 x 50 mL). The combined organic layers was dried over anhydrous MgSO<sub>4</sub> and concentrated under vacuum. The residue was purified by column chromatography on silica gel (eluent: hexanes/EtOAc) to give the desired Boc-protected propargylamide (92% yield).

Fuether transformation of the Boc-protected propargylamide according to the general procedure for the preparation of ynamide **1** afforded (-)-**1an** in 49% yield (3 steps) as a pale yellow oil.  $[\alpha]_D^{25} = -36.5^\circ$  (c = 1.0, CHCl<sub>3</sub>). The optical rotation of (-)-**1an** revealed the absolute configuration of (+)-**1** to be *R*.

#### 4. General Procedure for the Copper-Catalyzed Kinetic Resolution

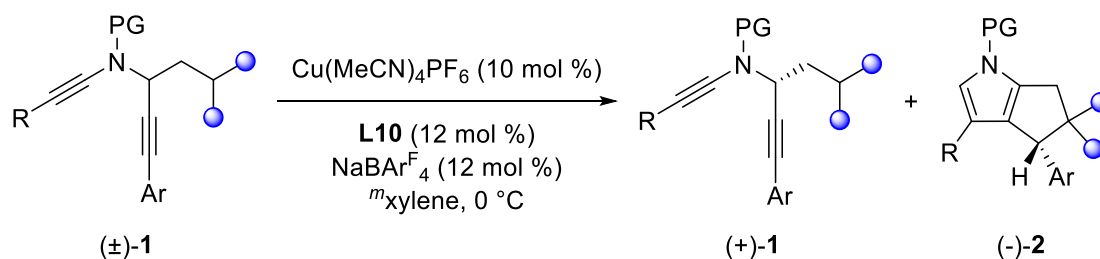

The powdered  $\text{Cu(MeCN)}_4\text{PF}_6$  (0.02 mmol, 7.5 mg), **L10** (0.024 mmol, 17.4 mg), and  $\text{NaBARF}_4$  (0.024 mmol, 21.3 mg) were introduced into an oven-dried Schlenk tube under argon atmosphere. After *m*-xylene (2 mL) was injected into the Schlenk tube, the solution was stirred at rt under the argon atmosphere for 2 h. Then the reaction was cooled to 0 °C, and *N*-propargyl ynamide **1** (0.2 mmol) in *m*-xylene (2 mL) was introduced into the system dropwise. The resulting mixture was stirred at indicating temperature and the progress of the reaction was monitored by TLC or HPLC. After concentration in vacuo, the residue was purified by flash chromatography on silica gel (eluent: hexanes/EA or hexanes/DCM) to give the final product (+)-**1** and (-)-**2**.

#### **(*R*)-*N*-(1-cyclohexyl-4-(4-(dimethylamino)phenyl)but-3-yn-2-yl)-*N*-((2,6-dimethylphenyl)ethynyl)-4-methylbenzenesulfonamide ((+)-**1a**)**

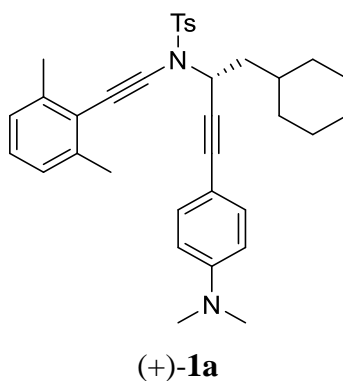

Compound (+)-**1a** was prepared in 42% yield (46.4 mg) according to the general procedure. Pale yellow oil, (eluent: PE/DCM = 2/1).  $[\alpha]_{\text{D}}^{25} = +106.3^\circ$  ( $c = 1.0$ ,  $\text{CHCl}_3$ ). 95% ee (determined by HPLC: Chiralpak IE Column, 5/95 *i*-PrOH/hexane, 1.0 mL/min, 254 nm; TR = 16.73 min (minor), 18.42 min (major)).

**(R)-4-(3'-(2,6-dimethylphenyl)-1'-tosyl-4',6'-dihydro-1'H-spiro[cyclohexane-1,5'-cyclopenta[b]pyrrol]-4'-yl)-N,N-dimethylaniline ((-)-2a)**

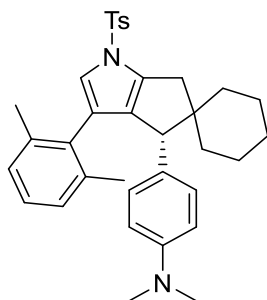

**(-)-2a**

Compound (-)-**2a** was prepared in 40% yield (44.2 mg) according to the general procedure. Pale yellow oil, (eluent: PE/DCM = 2/1).  $[\alpha]_D^{25} = -46.5^\circ$  ( $c = 1.0$ ,  $\text{CHCl}_3$ ). 94% ee (determined by HPLC: Chiralpak IE Column, 5/95 *i*-PrOH/hexane, 1.0 mL/min, 254 nm; TR = 10.23 min (minor), 11.65 min (major)).  $^1\text{H}$  NMR (500 MHz,  $\text{CDCl}_3$ )  $\delta$  7.75 (d,  $J = 8.5$  Hz, 2H), 7.32 (d,  $J = 8.0$  Hz, 2H), 6.98 – 6.89 (m, 2H), 6.87 (s, 1H), 6.78 (d,  $J = 7.5$  Hz, 1H), 6.45 (d,  $J = 8.0$  Hz, 2H), 6.38 (d,  $J = 8.5$  Hz, 2H), 3.22 (s, 1H), 2.90 (d,  $J = 16.0$  Hz, 1H), 2.82 (s, 6H), 2.71 (d,  $J = 16.0$  Hz, 1H), 2.45 (s, 3H), 1.95 (s, 3H), 1.64 (s, 3H), 1.59 – 1.33 (m, 6H), 1.23 – 1.12 (m, 2H), 1.09 – 1.01 (m, 1H), 0.96 – 0.82 (m, 1H);  $^{13}\text{C}$  NMR (125 MHz,  $\text{CDCl}_3$ )  $\delta$  149.0, 144.5, 137.1, 136.9(8), 136.9(5), 136.4(0), 136.3(7), 133.0, 129.7, 129.0, 128.7, 126.8, 126.8, 126.5, 126.5, 125.3, 121.6, 111.9, 55.7, 53.9, 40.7, 38.9, 36.8, 35.1, 26.0, 23.3(0), 23.2(9), 21.6, 20.5, 20.3; IR (neat): 2924, 2851, 1614, 1519, 1449, 1370, 1186, 1175, 1124, 1102; HRESIMS Calcd for  $[\text{C}_{35}\text{H}_{40}\text{KN}_2\text{O}_2\text{S}]^+$  ( $\text{M} + \text{K}^+$ ) 591.2442, found 591.2444.

**(R)-N-(1-cyclohexyl-4-(4-(dimethylamino)phenyl)but-3-yn-2-yl)-N-((2,6-dimethylphenyl)ethynyl)-4-methoxybenzenesulfonamide ((+)-1b)**

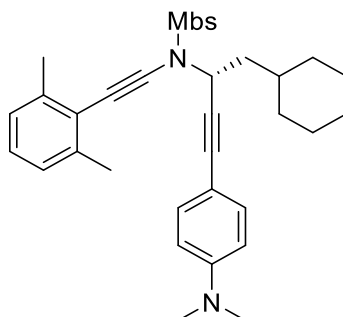

**(+)-1b**

Compound (+)-**1b** was prepared in 41% yield (46.7 mg) according to the general procedure. Pale yellow oil, (eluent: PE/DCM = 1/1).  $[\alpha]_D^{25} = +84.3^\circ$  ( $c = 1.0$ ,  $\text{CHCl}_3$ ). 99% ee (determined by HPLC: Chiralpak IE Column, 20/80 *i*-PrOH/hexane, 1.0 mL/min, 254 nm; TR = 10.72 min (minor), 11.49 min (major)).

**(R)-4-(3'-(2,6-dimethylphenyl)-1'-((4-methoxyphenyl)sulfonyl)-4',6'-dihydro-1'H-spiro[cyclohexane-1,5'-cyclopenta[*b*]pyrrol]-4'-yl)-*N,N*-dimethylaniline ((-)-2b)**

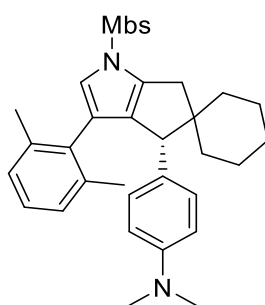

**(-)-2b**

Compound (-)-**2b** was prepared in 43% yield (48.8 mg) according to the general procedure. Pale yellow oil, (eluent: PE/DCM = 1/1).  $[\alpha]_D^{25} = -27.6^\circ$  ( $c = 1.0$ ,  $\text{CHCl}_3$ ). 95% ee (determined by HPLC: Chiralpak IE Column, 20/80 *i*-PrOH/hexane, 1.0 mL/min, 254 nm; TR = 7.29 min (minor), 8.24 min (major)).  $^1\text{H}$  NMR (500 MHz,  $\text{CDCl}_3$ )  $\delta$  7.81 (d,  $J = 9.0$  Hz, 2H), 7.02 – 6.89 (m, 4H), 6.86 (s, 1H), 6.78 (d,  $J = 7.0$  Hz, 1H), 6.50 – 6.35 (m, 4H), 3.88 (s, 3H), 3.22 (s, 1H), 2.91 (d,  $J = 16.0$  Hz, 1H), 2.82 (s, 6H), 2.71 (d,  $J = 16.0$  Hz, 1H), 1.96 (s, 3H), 1.64 (s, 3H), 1.62 – 1.43 (m, 4H), 1.43 – 1.29 (m, 2H), 1.25 – 1.14 (m, 2H), 1.08 – 0.87 (m, 2H);  $^{13}\text{C}$  NMR (125 MHz,  $\text{CDCl}_3$ )  $\delta$  163.6, 149.0, 137.1, 137.0, 136.4, 133.0, 130.9, 129.0, 128.8, 126.9, 126.8, 126.5, 125.2, 121.5, 114.2, 111.9, 55.7, 53.9, 40.7, 38.9, 36.9, 35.2, 26.0, 23.3, 20.6, 20.4; IR (neat): 2925, 2850, 1614, 1595, 1519, 1497, 1368, 1262, 1186, 1167; HRESIMS Calcd for  $[\text{C}_{35}\text{H}_{40}\text{KN}_2\text{O}_3\text{S}]^+$  ( $\text{M} + \text{K}^+$ ) 607.2391, found 607.2385.

**(R)-N-(1-cyclohexyl-4-(4-(dimethylamino)phenyl)but-3-yn-2-yl)-N-((2,6-dimethylphenyl)ethynyl)benzenesulfonamide ((+)-1c)**



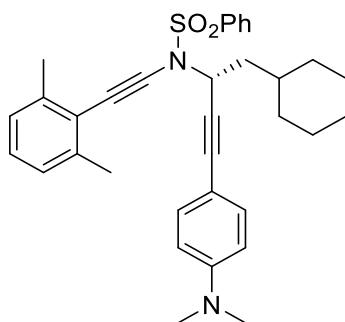

(+)-**1c**

Compound (+)-**1c** was prepared in 44% yield (47.3 mg) according to the general procedure. Pale yellow oil, (eluent: PE/DCM = 2/1).  $[\alpha]_D^{25} = +56.2^\circ$  ( $c = 1.0$ ,  $\text{CHCl}_3$ ). 95% ee (determined by HPLC: Chiralpak IE Column, 3/97 *i*-PrOH/hexane, 1.0 mL/min, 254 nm; TR = 17.08 min (minor), 18.53 min (major)).

**(*R*)-4-(3'-(2,6-dimethylphenyl)-1'-(phenylsulfonyl)-4',6'-dihydro-1'*H*-spiro[cyclohexane-1,5'-cyclopenta[*b*]pyrrol]-4'-yl)-*N,N*-dimethylaniline ((-)-2c)**

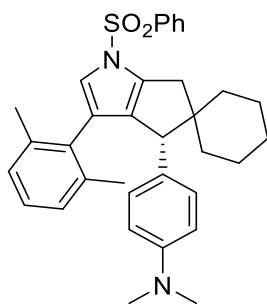

(-)-**2c**

Compound (-)-**2c** was prepared in 43% yield (46.3 mg) according to the general procedure. Pale yellow oil, (eluent: PE/DCM = 2/1).  $[\alpha]_D^{25} = -18.7^\circ$  ( $c = 1.0$ ,  $\text{CHCl}_3$ ). 96% ee (determined by HPLC: Chiralpak IE Column, 5/95 *i*-PrOH/hexane, 1.0 mL/min, 254 nm; TR = 8.98 min (minor), 10.42 min (major)).  $^1\text{H}$  NMR (500 MHz,  $\text{CDCl}_3$ )  $\delta$  7.87 (d,  $J = 7.5$  Hz, 2H), 7.63 (t,  $J = 7.5$  Hz, 1H), 7.57 – 7.50 (m, 2H), 6.97 – 6.89 (m, 2H), 6.88 (s, 1H), 6.78 (d,  $J = 7.5$  Hz, 1H), 6.47 (d,  $J = 8.5$  Hz, 2H), 6.40 (d,  $J = 9.0$  Hz, 2H), 3.22 (s, 1H), 2.92 (d,  $J = 16.0$  Hz, 1H), 2.82 (s, 6H), 2.74 (d,  $J = 16.0$  Hz, 1H), 1.94 (s, 3H), 1.63 (s, 3H), 1.59 – 1.35 (m, 6H), 1.22 – 1.12 (m, 2H), 1.10 – 1.02 (m, 1H), 0.96 – 0.88 (m, 1H);  $^{13}\text{C}$  NMR (125 MHz,  $\text{CDCl}_3$ )  $\delta$  149.0, 139.3, 137.2, 137.0, 136.9, 136.6, 133.5, 132.9, 129.1, 129.0, 128.7, 126.9, 126.8, 126.5, 125.5, 121.6, 112.0,

55.7, 53.9, 40.7, 38.9, 36.9, 35.1, 26.0, 23.3, 20.5, 20.3; IR (neat): 2924, 2851, 1614, 1519, 1448, 1370, 1183, 1124, 1100, 735; HRESIMS Calcd for  $[C_{34}H_{39}N_2O_2S]^+$  ( $M + H^+$ ) 539.2727, found 539.2721.

**(R)-4-bromo-N-(1-cyclohexyl-4-(4-(dimethylamino)phenyl)but-3-yn-2-yl)-N-((2,6-dimethylphenyl)ethynyl)benzenesulfonamide ((+)-1d)**

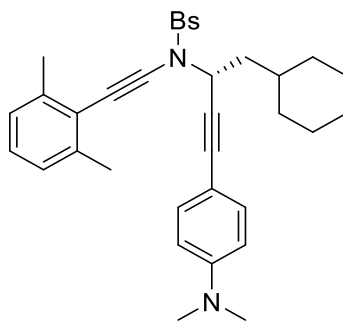

**(+)-1d**

Compound (+)-**1d** was prepared in 42% yield (52.0 mg) according to the general procedure. Pale yellow oil, (eluent: PE/DCM = 2/1).  $[\alpha]_D^{25} = +128.4^\circ$  ( $c = 1.0$ ,  $CHCl_3$ ). 98% ee (determined by HPLC: Chiralpak IE Column, 5/95 *i*-PrOH/hexane, 1.0 mL/min, 254 nm; TR = 9.44 min (minor), 10.41 min (major)).

**(R)-4-(1'-((4-bromophenyl)sulfonyl)-3'-(2,6-dimethylphenyl)-4',6'-dihydro-1'*H*-spiro[cyclohexane-1,5'-cyclopenta[*b*]pyrrol]-4'-yl)-*N,N*-dimethylaniline ((-)-2d)**

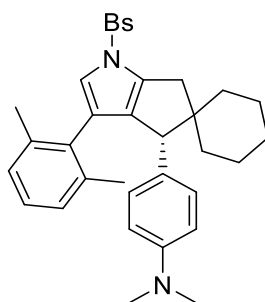

**(-)-2d**

Compound (-)-**2d** was prepared in 43% yield (53.0 mg) according to the general procedure. Pale yellow oil, (eluent: PE/DCM = 2/1).  $[\alpha]_D^{25} = -33.4^\circ$  ( $c = 1.0$ ,  $CHCl_3$ ). 96% ee (determined by HPLC: Chiralpak IE Column, 5/95 *i*-PrOH/hexane, 1.0 mL/min, 254 nm; TR = 7.26 min (minor), 8.27 min (major)).  $^1H$  NMR (500 MHz,  $CDCl_3$ )  $\delta$  7.74

(d,  $J = 8.5$  Hz, 2H), 7.68 (d,  $J = 9.0$  Hz, 2H), 6.99 – 6.89 (m, 2H), 6.86 (s, 1H), 6.79 (d,  $J = 7.0$  Hz, 1H), 6.44 – 6.31 (m, 4H), 3.22 (s, 1H), 2.90 (d,  $J = 16.0$  Hz, 1H), 2.83 (s, 6H), 2.68 (d,  $J = 16.0$  Hz, 1H), 1.97 (s, 3H), 1.61 (s, 3H), 1.59 – 1.34 (m, 6H), 1.22 – 1.11 (m, 2H), 1.10 – 1.01 (m, 1H), 0.97 – 0.89 (m, 1H);  $^{13}\text{C}$  NMR (125 MHz,  $\text{CDCl}_3$ )  $\delta$  149.1, 138.2, 137.3, 137.2, 136.9, 132.6, 132.4, 128.9, 128.6, 128.3, 128.0, 127.0, 126.9, 126.6, 126.1, 121.6, 111.9, 55.6, 54.0, 40.7, 38.9, 37.0, 35.2, 26.0, 23.3(1), 23.2(8), 20.6, 20.3; IR (neat): 2924, 2851, 1614, 1574, 1519, 1471, 1448, 1374, 1184, 1122; HRESIMS Calcd for  $[\text{C}_{34}\text{H}_{37}\text{BrN}_2\text{O}_2\text{SK}]^+$  ( $\text{M} + \text{K}^+$ ) 655.1391, found 655.1399.

**(*R*)-*N*-(1-cyclohexyl-4-(4-(dimethylamino)phenyl)but-3-yn-2-yl)-*N*-((2,6-dimethylphenyl)ethynyl)methanesulfonamide ((+)-**1e**)**

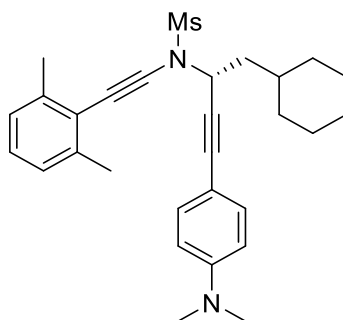

**(+)-**1e****

Compound (+)-**1e** was prepared in 41% yield (39.0 mg) according to the general procedure. Pale yellow oil, (eluent: PE/DCM = 2/1).  $[\alpha]_{\text{D}}^{25} = +23.3^\circ$  ( $c = 1.0$ ,  $\text{CHCl}_3$ ). 87% ee (determined by HPLC: Chiralpak IE Column, 5/95 *i*-PrOH/hexane, 1.0 mL/min, 254 nm; TR = 11.05 min (minor), 12.90 min (major)).

**(*R*)-4-(3'-(2,6-dimethylphenyl)-1'-(methanesulfonyl)-4',6'-dihydro-1'*H*-spiro[cyclohexane-1,5'-cyclopenta[*b*]pyrrol]-4'-yl)-*N,N*-dimethylaniline ((-)-**2e**)**

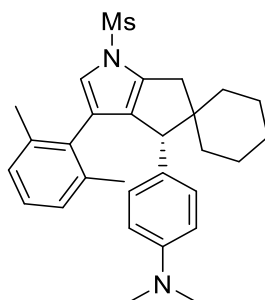

**(-)-2e**

Compound (-)-**2e** was prepared in 49% yield (46.6 mg) according to the general procedure. Pale yellow oil, (eluent: PE/DCM = 2/1).  $[\alpha]_D^{25} = -16.7^\circ$  (c = 1.0, CHCl<sub>3</sub>). 91% ee (determined by HPLC: Chiralpak ODH Column, 5/95 *i*-PrOH/hexane, 1.0 mL/min, 254 nm; TR = 9.02 min (minor), 10.17 min (major)). <sup>1</sup>H NMR (500 MHz, CDCl<sub>3</sub>) δ 7.01 – 6.91 (m, 2H), 6.81 (d, *J* = 7.0 Hz, 1H), 6.79 (s, 1H), 6.66 (d, *J* = 9.0 Hz, 2H), 6.48 (d, *J* = 8.5 Hz, 2H), 3.38 (s, 1H), 3.16 (s, 3H), 2.92 (d, *J* = 16.0 Hz, 1H), 2.87 – 2.79 (m, 7H), 2.10 (s, 3H), 1.86 – 1.78 (m, 1H), 1.76 (s, 3H), 1.68 – 1.49 (m, 5H), 1.25 – 1.13 (m, 3H), 1.03 – 0.93 (m, 1H); <sup>13</sup>C NMR (125 MHz, CDCl<sub>3</sub>) δ 149.1, 137.0(1), 136.9(8), 136.4, 135.5, 132.9, 129.1, 128.8, 126.9(1), 126.8(7), 126.5, 124.6, 120.6, 112.1, 55.8, 54.0, 42.3, 40.7, 39.3, 37.0, 35.2, 26.0, 23.4, 23.3, 20.7, 20.5; IR (neat): 2925, 2852, 1614, 1519, 1447, 1365, 1176, 1130, 958, 766; HRESIMS Calcd for [C<sub>29</sub>H<sub>37</sub>N<sub>2</sub>O<sub>2</sub>S]<sup>+</sup> (M + H<sup>+</sup>) 477.2570, found 477.2569.

**(R)-N-(1-cyclohexyl-4-(4-(dibenzylamino)phenyl)but-3-yn-2-yl)-N-((2,6-dimethylphenyl)ethynyl)-4-methylbenzenesulfonamide ((+)-1f)**

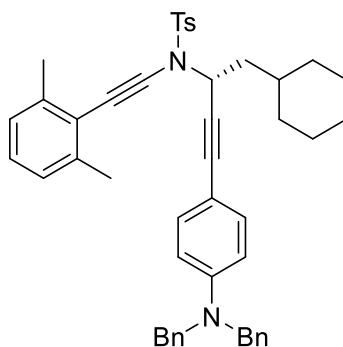

**(+)-1f**

Compound (+)-**1f** was prepared in 41% yield (57.8 mg) according to the general procedure at 30 °C. Pale yellow oil, (eluent: PE/DCM = 2/1).  $[\alpha]_D^{25} = +71.7^\circ$  (c = 1.0, CHCl<sub>3</sub>). 98% ee (determined by HPLC: Chiralpak IE Column, 30/70 *i*-PrOH/hexane, 1.0 mL/min, 254 nm; TR = 7.59 min (minor), 13.35 min (major)).

**(R)-N,N-dibenzyl-4-(3'-(2,6-dimethylphenyl)-1'-tosyl-4',6'-dihydro-1'H-spiro[cyclohexane-1,5'-cyclopenta[*b*]pyrrol]-4'-yl)aniline ((-)-2f)**

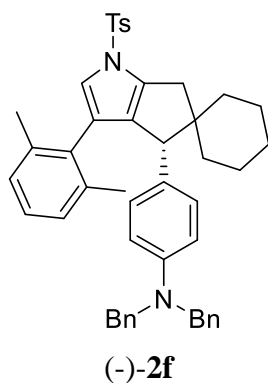

Compound **(-)-2f** was prepared in 39% yield (55.1 mg) according to the general procedure at 30 °C. Pale yellow oil, (eluent: PE/DCM = 2/1).  $[\alpha]_D^{25} = -123.5^\circ$  ( $c = 1.0$ ,  $\text{CHCl}_3$ ). 98% ee (determined by HPLC: Chiralpak ODH Column, 3/97 *i*-PrOH/hexane, 1.0 mL/min, 254 nm; TR = 12.39 min (major), 14.61 min (minor)).  $^1\text{H NMR}$  (500 MHz,  $\text{CDCl}_3$ )  $\delta$  7.70 (d,  $J = 8.5$  Hz, 2H), 7.31 – 7.26 (m, 4H), 7.25 – 7.22 (m, 4H), 7.15 (d,  $J = 7.0$  Hz, 4H), 6.99 – 6.95 (m, 1H), 6.90 (d,  $J = 7.5$  Hz, 1H), 6.84 (s, 1H), 6.80 (d,  $J = 7.5$  Hz, 1H), 6.41 – 6.24 (m, 4H), 4.49 (q,  $J = 17.0$  Hz, 4H), 3.19 (s, 1H), 2.89 (d,  $J = 16.5$  Hz, 1H), 2.69 (d,  $J = 16.5$  Hz, 1H), 2.30 (s, 3H), 1.94 (s, 3H), 1.67 – 1.59 (m, 1H), 1.56 (s, 3H), 1.53 – 1.31 (m, 5H), 1.23 – 1.10 (m, 3H), 1.01 – 0.91 (m, 1H);  $^{13}\text{C NMR}$  (125 MHz,  $\text{CDCl}_3$ )  $\delta$  147.4, 144.5, 138.8, 137.0, 137.0, 136.9, 136.8, 136.3, 132.9, 129.6, 129.2, 128.8, 128.4, 126.7(9), 126.7(6), 126.7(4), 126.5, 126.4, 125.2, 121.6, 111.9, 55.7, 54.1, 53.7, 39.0, 37.1, 35.0, 30.3, 26.0, 23.3(1), 23.2(9), 21.4, 20.5, 20.2; IR (neat): 2925, 2852, 1612, 1518, 1494, 1370, 1174, 1101, 730; HRESIMS Calcd for  $[\text{C}_{47}\text{H}_{48}\text{N}_2\text{O}_2\text{SNa}]^+$  ( $\text{M} + \text{Na}^+$ ) 727.3329, found 727.3320.

**(R)-N-(1-cyclohexyl-4-(4-(diethylamino)phenyl)but-3-yn-2-yl)-N-((2,6-dimethylphenyl)ethynyl)-4-methylbenzenesulfonamide ((+)-1g)**

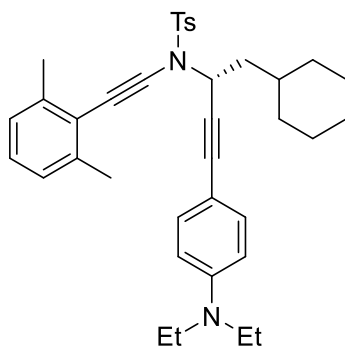

(+)-**1g**

Compound (+)-**1g** was prepared in 40% yield (46.4 mg) according to the general procedure. Pale yellow oil, (eluent: PE/DCM = 2/1).  $[\alpha]_D^{25} = +41.3^\circ$  ( $c = 1.0$ ,  $\text{CHCl}_3$ ). 79% ee (determined by HPLC: Chiralpak ADH Column, 5/95 *i*-PrOH/hexane, 1.0 mL/min, 254 nm; TR = 6.86 min (minor), 15.43 min (major)).

(*R*)-4-(3'-(2,6-dimethylphenyl)-1'-tosyl-4',6'-dihydro-1'*H*-spiro[cyclohexane-1,5'-cyclopenta[*b*]pyrrol]-4'-yl)-*N,N*-diethylaniline ((-)-**2g**)

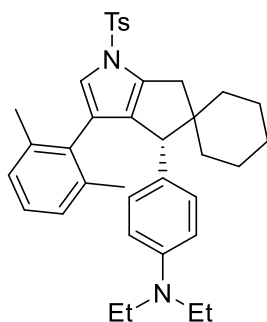

(-)-**2g**

Compound (-)-**2g** was prepared in 39% yield (45.3 mg) according to the general procedure. Pale yellow oil, (eluent: PE/DCM = 2/1).  $[\alpha]_D^{25} = -56.3^\circ$  ( $c = 1.0$ ,  $\text{CHCl}_3$ ). 82% ee (determined by HPLC: Chiralpak IE Column, 2/98 *i*-PrOH/hexane, 1.0 mL/min, 254 nm; TR = 8.31 min (minor), 9.13 min (major)).  $^1\text{H NMR}$  (500 MHz,  $\text{CDCl}_3$ )  $\delta$  7.75 (d,  $J = 8.5$  Hz, 2H), 7.32 (d,  $J = 8.0$  Hz, 2H), 6.97 – 6.88 (m, 2H), 6.86 (s, 1H), 6.78 (d,  $J = 7.5$  Hz, 1H), 6.40 (d,  $J = 8.0$  Hz, 2H), 6.32 (d,  $J = 9.0$  Hz, 2H), 3.30 – 3.13 (m, 5H), 2.90 (d,  $J = 16.0$  Hz, 1H), 2.72 (d,  $J = 16.0$  Hz, 1H), 2.45 (s, 3H), 1.95 (s, 3H), 1.63 (s, 3H), 1.62 – 1.38 (m, 6H), 1.21 – 1.09 (m, 3H), 1.06 (t,  $J = 7.0$  Hz, 6H), 1.00 – 0.91 (m, 1H);  $^{13}\text{C NMR}$  (125 MHz,  $\text{CDCl}_3$ )  $\delta$  146.2, 144.5, 137.1, 137.0, 136.7, 136.4, 133.0, 129.7, 129.2, 127.7, 126.8(0), 126.7(8), 126.6, 126.4, 125.3, 121.6, 111.8, 55.7, 53.8, 44.4, 38.9, 36.9, 35.1, 26.0, 23.3, 21.6, 20.6, 20.3, 12.4; IR (neat): 2926, 2851, 1612, 1558, 1371, 1175, 1121, 1003, 813; HRESIMS Calcd for  $[\text{C}_{37}\text{H}_{45}\text{N}_2\text{O}_2\text{S}]^+$  ( $\text{M} + \text{H}^+$ ) 581.3196, found 581.3186.

**(R)-N-(1-cyclohexyl-4-(4-(piperidin-1-yl)phenyl)but-3-yn-2-yl)-N-((2,6-dimethylphenyl)ethynyl)-4-methylbenzenesulfonamide ((+)-1h)**

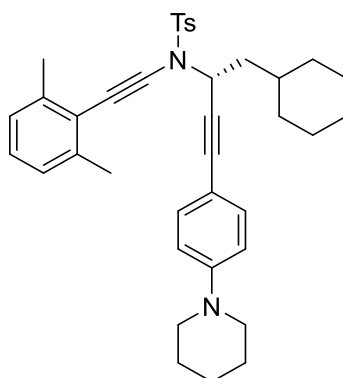

**(+)-1h**

Compound (+)-**1h** was prepared in 47% yield (55.8 mg) according to the general procedure. Pale yellow oil, (eluent: PE/DCM = 2/1).  $[\alpha]_D^{25} = +68.8^\circ$  ( $c = 1.0$ ,  $\text{CHCl}_3$ ). 90% ee (determined by HPLC: Chiralpak ADH Column, 5/95 *i*-PrOH/hexane, 1.0 mL/min, 254 nm; TR = 8.35 min (minor), 12.86 min (major)).

**(R)-3'-(2,6-dimethylphenyl)-4'-(4-(piperidin-1-yl)phenyl)-1'-tosyl-4',6'-dihydro-1'H-spiro[cyclohexane-1,5'-cyclopenta[*b*]pyrrole] ((-)-2h)**

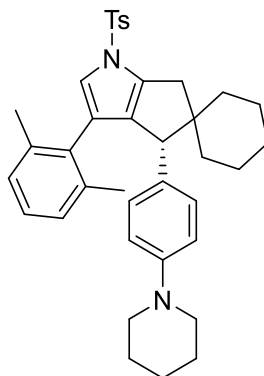

**(-)-2h**

Compound (-)-**2h** was prepared in 46% yield (54.6 mg) according to the general procedure. Pale yellow oil, (eluent: PE/DCM = 2/1).  $[\alpha]_D^{25} = -63.8^\circ$  ( $c = 1.0$ ,  $\text{CHCl}_3$ ). 90% ee (determined by HPLC: Chiralpak ADH Column, 5/95 *i*-PrOH/hexane, 1.0 mL/min, 254 nm; TR = 4.64 min (major), 6.04 min (minor)).  $^1\text{H}$  NMR (500 MHz,  $\text{CDCl}_3$ )  $\delta$  7.74 (d,  $J = 8.0$  Hz, 2H), 7.32 (d,  $J = 7.5$  Hz, 2H), 7.06 – 6.82 (m, 3H), 6.77

(d,  $J = 7.0$  Hz, 1H), 6.57 (d,  $J = 8.5$  Hz, 2H), 6.46 (d,  $J = 8.0$  Hz, 2H), 3.23 (s, 1H), 3.09 – 2.95 (m, 4H), 2.90 (d,  $J = 16.0$  Hz, 1H), 2.72 (d,  $J = 16.0$  Hz, 1H), 2.45 (s, 3H), 1.94 (s, 3H), 1.68 – 1.58 (m, 8H), 1.57 – 1.50 (m, 4H), 1.44 – 1.33 (m, 2H), 1.23 – 0.77 (m, 5H);  $^{13}\text{C}$  NMR (125 MHz,  $\text{CDCl}_3$ )  $\delta$  150.5, 144.5, 137.2, 137.0, 136.9, 136.4, 136.3, 132.9, 131.4, 129.7, 128.9, 126.9, 126.8, 126.5(4), 126.4(7), 125.2, 121.6, 115.7, 55.8, 53.9, 50.9, 39.0, 36.9, 35.1, 26.0, 25.9, 24.2, 23.3, 21.6, 20.5, 20.3; IR (neat): 2930, 2852, 1610, 1594, 1512, 1371, 1174, 1102, 1051, 811; HRESIMS Calcd for  $[\text{C}_{38}\text{H}_{45}\text{N}_2\text{O}_2\text{S}]^+$  ( $\text{M} + \text{H}^+$ ) 593.3196, found 593.3192.

**(*R*)-*N*-(1-cyclohexyl-4-(4-morpholinophenyl)but-3-yn-2-yl)-*N*-((2,6-dimethylphenyl)ethynyl)-4-methylbenzenesulfonamide ((+)-**1i**)**

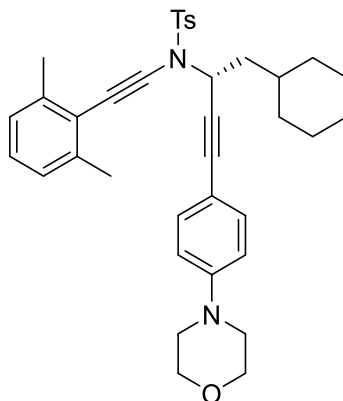

**(+)-**1i****

Compound (+)-**1i** was prepared in 38% yield (45.2 mg) according to the general procedure. Pale yellow oil, (eluent: PE/DCM = 2/1).  $[\alpha]_{\text{D}}^{25} = +23.1^\circ$  ( $c = 1.0$ ,  $\text{CHCl}_3$ ). 98% ee (determined by HPLC: Chiralpak ADH Column, 20/80 *i*-PrOH/hexane, 1.0 mL/min, 254 nm; TR = 6.98 min (minor), 9.72 min (major)).

**(*R*)-4-(4-(3'-(2,6-dimethylphenyl)-1'-tosyl-4',6'-dihydro-1'*H*-spiro[cyclohexane-1,5'-cyclopenta[*b*]pyrrol]-4'-yl)phenyl)morpholine ((-)-**2i**)**



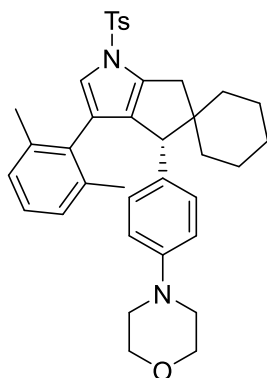

**(-)-2i**

Compound **(-)-2i** was prepared in 37% yield (44.0 mg) according to the general procedure. Pale yellow oil, (eluent: PE/DCM = 2/1).  $[\alpha]_D^{25} = -29.6^\circ$  ( $c = 1.0$ ,  $\text{CHCl}_3$ ). 97% ee (determined by HPLC: Chiralpak ADH Column, 5/95 *i*-PrOH/hexane, 1.0 mL/min, 254 nm; TR = 6.89 min (minor), 7.95 min (major)).  $^1\text{H}$  NMR (500 MHz,  $\text{CDCl}_3$ )  $\delta$  7.75 (d,  $J = 8.0$  Hz, 2H), 7.32 (d,  $J = 8.0$  Hz, 2H), 6.96 – 6.92 (m, 1H), 6.90 (d,  $J = 7.0$  Hz, 1H), 6.87 (s, 1H), 6.78 (d,  $J = 7.5$  Hz, 1H), 6.61 – 6.46 (m, 4H), 3.89 – 3.72 (m, 4H), 3.25 (s, 1H), 3.08 – 2.95 (m, 4H), 2.91 (d,  $J = 16.0$  Hz, 1H), 2.73 (d,  $J = 16.0$  Hz, 1H), 2.45 (s, 3H), 1.94 (s, 3H), 1.64 (s, 3H), 1.60 – 1.30 (m, 6H), 1.22 – 1.10 (m, 2H), 1.09 – 1.01 (m, 1H), 0.95 – 0.81 (m, 1H);  $^{13}\text{C}$  NMR (125 MHz,  $\text{CDCl}_3$ )  $\delta$  149.4, 144.5, 137.2, 136.9(3), 136.8(6), 136.4, 136.0, 132.9, 132.2, 129.7, 129.1, 126.8, 126.5, 125.0, 121.6, 114.8, 66.9, 55.8, 53.9, 49.5, 38.9, 36.8, 35.1, 26.0, 23.3, 21.6, 20.5, 20.3; IR (neat): 2925, 2853, 1611, 1513, 1407, 1303, 1174, 1104, 814; HRESIMS Calcd for  $[\text{C}_{37}\text{H}_{42}\text{N}_2\text{O}_3\text{SNa}]^+$  ( $\text{M} + \text{Na}^+$ ) 633.2548, found 633.2554.

**(R)-N-(1-cyclohexyl-4-(4-(dimethylamino)-2-methylphenyl)but-3-yn-2-yl)-N-(2,6-dimethylphenyl)ethynyl)-4-methylbenzenesulfonamide ((+)-1j)**

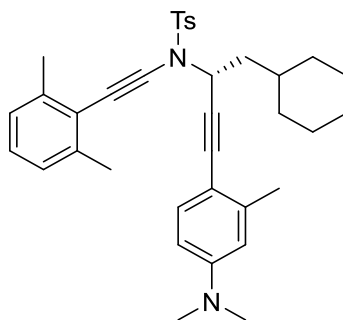

**(+)-1j**

Compound (+)-**1j** was prepared in 42% yield (47.7 mg) according to the general procedure. Pale yellow oil, (eluent: PE/DCM = 2/1).  $[\alpha]_D^{25} = +53.3^\circ$  (c = 1.0, CHCl<sub>3</sub>). 97% ee (determined by HPLC: Chiralpak IE Column, 10/90 *i*-PrOH/hexane, 1.0 mL/min, 254 nm; TR = 9.64 min (minor), 10.58 min (major)).

**(R)-4-(3'-(2,6-dimethylphenyl)-1'-tosyl-4',6'-dihydro-1'H-spiro[cyclohexane-1,5'-cyclopenta[*b*]pyrrol]-4'-yl)-*N,N*,3-trimethylaniline ((-)-2j)**

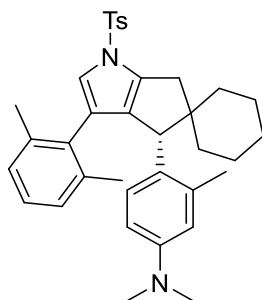

**(-)-2j**

Compound (-)-**2j** was prepared in 44% yield (49.7 mg) according to the general procedure. Pale yellow oil, (eluent: PE/DCM = 2/1).  $[\alpha]_D^{25} = -41.5^\circ$  (c = 1.0, CHCl<sub>3</sub>). 95% ee (determined by HPLC: Chiralpak IE Column, 10/90 *i*-PrOH/hexane, 1.0 mL/min, 254 nm; TR = 7.53 min (minor), 8.89 min (major)). <sup>1</sup>H NMR (400 MHz, CDCl<sub>3</sub>)  $\delta$  7.74 (d, *J* = 8.4 Hz, 2H), 7.32 (d, *J* = 8.0 Hz, 2H), 6.98 – 6.89 (m, 2H), 6.87 (s, 1H), 6.79 (d, *J* = 7.2 Hz, 1H), 6.42 (d, *J* = 8.0 Hz, 2H), 6.27 (d, *J* = 8.8 Hz, 2H), 3.21 (s, 1H), 2.90 (d, *J* = 16.4 Hz, 1H), 2.77 – 2.67 (m, 4H), 2.45 (s, 3H), 1.95 (s, 3H), 1.65 (s, 3H), 1.63 – 1.38 (m, 6H), 1.21 – 1.11 (m, 2H), 1.10 – 1.00 (m, 1H), 0.94 – 0.84 (m, 1H); <sup>13</sup>C NMR (100 MHz, CDCl<sub>3</sub>)  $\delta$  147.5, 144.5, 137.1, 137.0, 136.5, 136.3, 133.0, 129.7, 129.4, 129.2, 126.9, 126.8, 126.6, 126.5, 125.2, 121.6, 111.6, 55.8, 53.9, 39.0, 36.9, 35.1, 30.8, 26.0, 23.3, 21.6, 20.5, 20.4; IR (neat): 2925, 2853, 1615, 1519, 1488, 1369, 1174, 1125, 1102, 1005, 673; HRESIMS Calcd for [C<sub>36</sub>H<sub>43</sub>N<sub>2</sub>O<sub>2</sub>S]<sup>+</sup> (M + H<sup>+</sup>) 567.3040, found 567.3050.

**(R)-*N*-(1-cyclohexyl-4-(4-(dimethylamino)phenyl)but-3-yn-2-yl)-*N*-(mesitylethynyl)-4-methylbenzenesulfonamide ((+)-1k)**

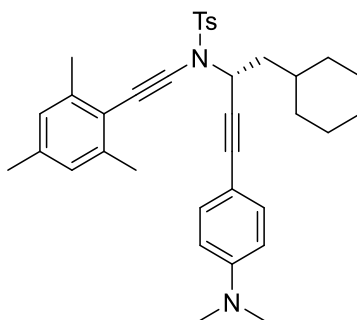

(+)-**1k**

Compound (+)-**1k** was prepared in 42% yield (47.6 mg) according to the general procedure. Pale yellow oil, (eluent: PE/DCM = 2/1).  $[\alpha]_D^{25} = +32.8^\circ$  ( $c = 1.0$ ,  $\text{CHCl}_3$ ). 93% ee (determined by HPLC: Chiralpak IE Column, 5/95 *i*-PrOH/hexane, 1.0 mL/min, 254 nm; TR = 17.47 min (minor), 18.78 min (major)).

**(R)-4-(3'-mesityl-1'-tosyl-4',6'-dihydro-1'H-spiro[cyclohexane-1,5'-cyclopenta[*b*]pyrrol]-4'-yl)-*N,N*-dimethylaniline ((-)-2k)**

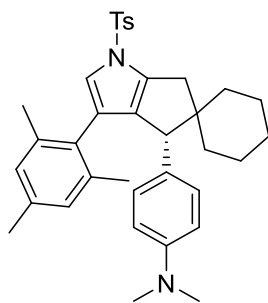

(-)-**2k**

Compound (-)-**2k** was prepared in 40% yield (45.3 mg) according to the general procedure. Pale yellow solid (mp 163–164 °C), (eluent: PE/DCM = 2/1).  $[\alpha]_D^{25} = -58.3^\circ$  ( $c = 1.0$ ,  $\text{CHCl}_3$ ). 95% ee (determined by HPLC: Chiralpak IE Column, 5/95 *i*-PrOH/hexane, 1.0 mL/min, 254 nm; TR = 10.34 min (minor), 11.63 min (major)).  $^1\text{H}$  NMR (500 MHz,  $\text{CDCl}_3$ )  $\delta$  7.74 (d,  $J = 8.0$  Hz, 2H), 7.32 (d,  $J = 8.0$  Hz, 2H), 6.85 (s, 1H), 6.73 (s, 1H), 6.61 (s, 1H), 6.46 (d,  $J = 8.0$  Hz, 2H), 6.39 (d,  $J = 8.5$  Hz, 2H), 3.22 (s, 1H), 2.90 (d,  $J = 16.0$  Hz, 1H), 2.83 (s, 6H), 2.69 (d,  $J = 16.0$  Hz, 1H), 2.45 (s, 3H), 2.17 (s, 3H), 1.91 (s, 3H), 1.65 – 1.43 (m, 9H), 1.21 – 1.11 (m, 2H), 1.05 – 0.88 (m, 2H);  $^{13}\text{C}$  NMR (125 MHz,  $\text{CDCl}_3$ )  $\delta$  149.0, 144.5, 137.2, 136.8, 136.5, 136.4, 136.2, 130.0, 129.7, 129.0, 128.8, 127.7, 127.3, 126.5, 125.3, 121.8, 111.9, 55.7, 53.9, 40.7,

38.9, 36.8, 35.2, 26.0, 23.3(3), 23.2(9), 21.6, 20.9, 20.5, 20.2; IR (neat): 2924, 2852, 1613, 1519, 1369, 1186, 1117, 1125, 1010; HRESIMS Calcd for  $[C_{36}H_{42}N_2NaO_2S]^+$  ( $M + Na^+$ ) 589.2859, found 589.2849.

**(R)-N-(1-cyclohexyl-4-(4-(dimethylamino)phenyl)but-3-yn-2-yl)-N-((4-fluoro-2,6-dimethylphenyl)ethynyl)-4-methylbenzenesulfonamide ((+)-11)**

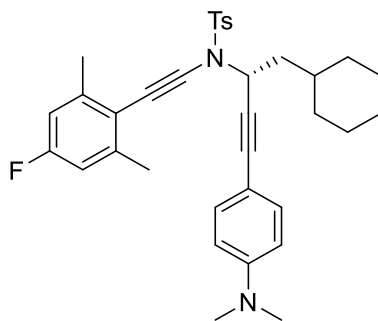

**(+)-11**

Compound (+)-**11** was prepared in 42% yield (48.0 mg) according to the general procedure. Pale yellow oil, (eluent: PE/DCM = 2/1).  $[\alpha]_D^{25} = +43.2^\circ$  ( $c = 1.0$ ,  $CHCl_3$ ). 94% ee (determined by HPLC: Chiralpak IE Column, 10/90 *i*-PrOH/hexane, 1.0 mL/min, 254 nm; TR = 10.10 min (minor), 11.41 min (major)).

**(R)-4-(3'-(4-fluoro-2,6-dimethylphenyl)-1'-tosyl-4',6'-dihydro-1'H-spiro[cyclohexane-1,5'-cyclopenta[*b*]pyrrol]-4'-yl)-*N,N*-dimethylaniline ((-)-21)**

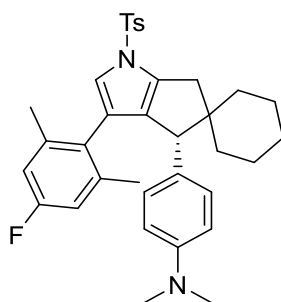

**(-)-21**

Compound (-)-**21** was prepared in 40% yield (45.6 mg) according to the general procedure. Pale yellow oli, (eluent: PE/DCM = 2/1).  $[\alpha]_D^{25} = -14.2^\circ$  ( $c = 1.0$ ,  $CHCl_3$ ). 96% ee (determined by HPLC: Chiralpak IE Column, 5/95 *i*-PrOH/hexane, 1.0 mL/min, 254 nm; TR = 9.47 min (minor), 10.30 min (major)).  $^1H$  NMR (500 MHz,  $CDCl_3$ )  $\delta$

7.75 (d,  $J = 8.5$  Hz, 2H), 7.32 (d,  $J = 8.0$  Hz, 2H), 6.85 (s, 1H), 6.64 – 6.58 (m, 1H), 6.51 – 6.47 (m, 1H), 6.45 (d,  $J = 8.0$  Hz, 2H), 6.39 (d,  $J = 8.5$  Hz, 2H), 3.21 (s, 1H), 2.90 (d,  $J = 16.0$  Hz, 1H), 2.83 (s, 6H), 2.73 (d,  $J = 16.0$  Hz, 1H), 2.46 (s, 3H), 1.93 (s, 3H), 1.62 (s, 3H), 1.61 – 1.47 (m, 4H), 1.42 – 1.34 (m, 2H), 1.21 – 1.12 (m, 2H), 1.10 – 1.03 (m, 1H), 0.94 – 0.86 (m, 1H);  $^{13}\text{C}$  NMR (150 MHz,  $\text{CDCl}_3$ )  $\delta$  161.4 (d,  $J = 243.9$  Hz), 149.0, 144.6, 139.3 (d,  $J = 8.2$  Hz), 139.2 (d,  $J = 8.1$  Hz), 137.2, 136.3(4), 136.2(8), 129.7, 129.0, 128.7 (d,  $J = 2.8$  Hz), 128.5, 126.5, 124.3, 121.8, 113.3 (d,  $J = 20.7$  Hz), 113.1 (d,  $J = 20.8$  Hz), 111.9, 55.7, 53.9, 40.7, 38.9, 36.9, 35.1, 26.0, 23.3, 23.2, 21.6, 20.6 (d,  $J = 1.1$  Hz), 20.5 (d,  $J = 0.9$  Hz);  $^{19}\text{F}$  NMR (376 MHz,  $\text{CDCl}_3$ )  $\delta$  -117.1 (s); IR (neat): 2925, 2852, 1681, 1612, 1519, 1449, 1370, 1303, 1186, 1174; HRESIMS Calcd for  $[\text{C}_{35}\text{H}_{39}\text{FN}_2\text{NaO}_2\text{S}]^+$  ( $\text{M} + \text{Na}^+$ ) 593.2608, found 593.2615.

**(*R*)-*N*-((4-chloro-2,6-dimethylphenyl)ethynyl)-*N*-(1-cyclohexyl-4-(4-(dimethylamino)phenyl)but-3-yn-2-yl)-4-methylbenzenesulfonamide ((+)-1m)**

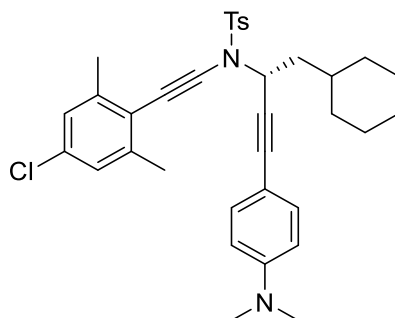

**(+)-1m**

Compound (+)-**1m** was prepared in 40% yield (47.0 mg) according to the general procedure. Pale yellow oil, (eluent: PE/DCM = 2/1).  $[\alpha]_{\text{D}}^{25} = +22.3^\circ$  ( $c = 1.0$ ,  $\text{CHCl}_3$ ). 98% ee (determined by HPLC: Chiralpak ADH Column, 5/95 *i*-PrOH/hexane, 1.0 mL/min, 254 nm; TR = 13.96 min (minor), 15.40 min (major)).

**(*R*)-4-(3'-(4-chloro-2,6-dimethylphenyl)-1'-tosyl-4',6'-dihydro-1'*H*-spiro[cyclohexane-1,5'-cyclopenta[*b*]pyrrol]-4'-yl)-*N,N*-dimethylaniline ((-)-2m)**

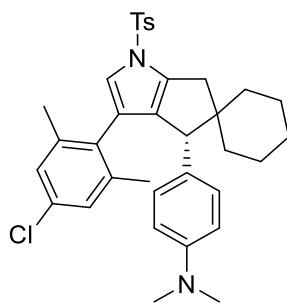

**(-)-2m**

Compound **(-)-2m** was prepared in 39% yield (45.8 mg) according to the general procedure. Pale yellow solid (mp 188–189 °C), (eluent: PE/DCM = 2/1).  $[\alpha]_D^{25} = -21.2^\circ$  ( $c = 1.0$ ,  $\text{CHCl}_3$ ). 97% ee (determined by HPLC: Chiralpak IE Column, 5/95 *i*-PrOH/hexane, 1.0 mL/min, 254 nm; TR = 9.12 min (minor), 10.04 min (major)).  $^1\text{H}$  NMR (600 MHz,  $\text{CDCl}_3$ )  $\delta$  7.75 (d,  $J = 7.8$  Hz, 2H), 7.33 (d,  $J = 8.4$  Hz, 2H), 6.90 (s, 1H), 6.85 (s, 1H), 6.78 (s, 1H), 6.45 (d,  $J = 7.2$  Hz, 2H), 6.39 (d,  $J = 8.4$  Hz, 2H), 3.20 (s, 1H), 2.90 (d,  $J = 16.2$  Hz, 1H), 2.83 (s, 6H), 2.72 (d,  $J = 16.2$  Hz, 1H), 2.46 (s, 3H), 1.92 (s, 3H), 1.61 (s, 3H), 1.60 – 1.37 (m, 6H), 1.21 – 1.11 (m, 2H), 1.08 – 1.02 (m, 1H), 0.94 – 0.86 (m, 1H);  $^{13}\text{C}$  NMR (150 MHz,  $\text{CDCl}_3$ )  $\delta$  149.0, 144.6, 138.8(9), 138.8(7), 137.3, 136.3, 136.1, 132.1, 131.6, 129.7, 129.0, 128.5, 126.7, 126.6, 126.4, 124.0, 121.6, 111.9, 55.7, 53.9, 40.7, 38.9, 36.8, 35.1, 26.0, 23.3, 21.6, 20.4, 20.2; IR (neat): 2926, 2854, 1611, 1518, 1447, 1369, 1303, 1173, 1101, 1006, 811; HRESIMS Calcd for  $[\text{C}_{35}\text{H}_{39}\text{ClN}_2\text{NaO}_2\text{S}]^+$  ( $\text{M} + \text{Na}^+$ ) 609.2313, found 609.2292.

**(R)-N-((4-bromo-2,6-dimethylphenyl)ethynyl)-N-(1-cyclohexyl-4-(4-(dimethylamino)phenyl)but-3-yn-2-yl)-4-methylbenzenesulfonamide ((+)-1n)**

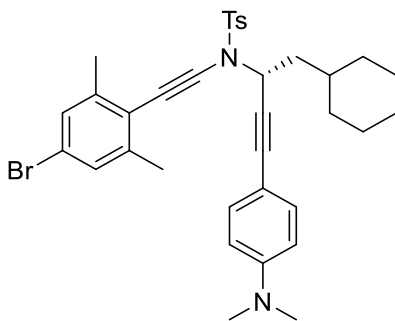

**(+)-1n**

Compound (+)-**1n** was prepared in 40% yield (50.6 mg) according to the general procedure. Pale yellow oil, (eluent: PE/DCM = 2/1).  $[\alpha]_D^{25} = +43.2^\circ$  (c = 1.0, CHCl<sub>3</sub>). 98% ee (determined by HPLC: Chiralpak IE Column, 10/90 *i*-PrOH/hexane, 1.0 mL/min, 254 nm; TR = 10.16 min (minor), 11.15 min (major)).

**(R)-4-(3'-(4-bromo-2,6-dimethylphenyl)-1'-tosyl-4',6'-dihydro-1'H-spiro[cyclohexane-1,5'-cyclopenta[*b*]pyrrol]-4'-yl)-*N,N*-dimethylaniline ((-)-2n)**

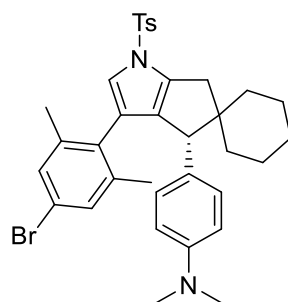

**(-)-2n**

Compound (-)-**2n** was prepared in 39% yield (49.3 mg) according to the general procedure. Pale yellow solid (mp 195–196 °C), (eluent: PE/DCM = 2/1).  $[\alpha]_D^{25} = -32.3^\circ$  (c = 1.0, CHCl<sub>3</sub>). 95% ee (determined by HPLC: Chiralpak IC Column, 5/95 *i*-PrOH/hexane, 1.0 mL/min, 254 nm; TR = 8.78 min (minor), 10.08 min (major)). <sup>1</sup>H NMR (400 MHz, CDCl<sub>3</sub>) δ 7.75 (d, *J* = 8.4 Hz, 2H), 7.32 (d, *J* = 8.0 Hz, 2H), 7.05 (s, 1H), 6.93 (s, 1H), 6.85 (s, 1H), 6.45 (d, *J* = 8.4 Hz, 2H), 6.39 (d, *J* = 8.8 Hz, 2H), 3.20 (s, 1H), 2.90 (d, *J* = 16.0 Hz, 1H), 2.83 (s, 6H), 2.71 (d, *J* = 16.0 Hz, 1H), 2.45 (s, 3H), 1.92 (s, 3H), 1.61 (s, 3H), 1.59 – 1.34 (m, 6H), 1.21 – 0.86 (m, 4H); <sup>13</sup>C NMR (100 MHz, CDCl<sub>3</sub>) δ 149.1, 144.6, 139.2, 137.3, 136.4, 136.0, 132.1, 129.7, 129.6, 129.3, 129.0, 128.4, 126.6, 124.0, 121.5, 120.5, 111.9, 55.7, 53.9, 40.7, 39.0, 36.9, 35.1, 26.0, 23.3, 21.6, 20.3, 20.2; IR (neat): 2925, 2853, 1615, 1516, 1488, 1450, 1369, 1269, 1174, 1102, 673; HRESIMS Calcd for [C<sub>35</sub>H<sub>39</sub>BrN<sub>2</sub>NaO<sub>2</sub>S]<sup>+</sup> (M + Na<sup>+</sup>) 653.1808, found 653.1800.

**(R)-*N*-(1-cyclohexyl-4-(4-(dimethylamino)phenyl)but-3-yn-2-yl)-*N*-((3,5-dimethyl-[1,1'-biphenyl]-4-yl)ethynyl)-4-methylbenzenesulfonamide ((+)-1o)**

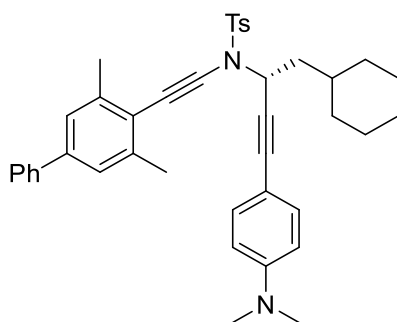

(+)-**1o**

Compound (+)-**1o** was prepared in 40% yield (50.3 mg) according to the general procedure. Pale yellow oil, (eluent: PE/DCM = 2/1).  $[\alpha]_D^{25} = +100.8^\circ$  ( $c = 1.0$ ,  $\text{CHCl}_3$ ). 97% ee (determined by HPLC: Chiralpak ADH Column, 10/90 *i*-PrOH/hexane, 1.0 mL/min, 254 nm; TR = 7.49 min (minor), 10.38 min (major)).

**(R)-4-(3'-(3,5-dimethyl-[1,1'-biphenyl]-4-yl)-1'-tosyl-4',6'-dihydro-1'H-spiro[cyclohexane-1,5'-cyclopenta[*b*]pyrrol]-4'-yl)-*N,N*-dimethylaniline ((-)-2o)**

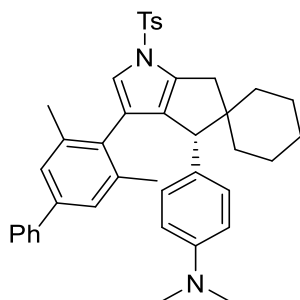

(-)-**2o**

Compound (-)-**2o** was prepared in 42% yield (52.8 mg) according to the general procedure. Pale yellow oil, (eluent: PE/DCM = 2/1).  $[\alpha]_D^{25} = -100.6^\circ$  ( $c = 1.0$ ,  $\text{CHCl}_3$ ). 95% ee (determined by HPLC: Chiralpak IC Column, 5/95 *i*-PrOH/hexane, 1.0 mL/min, 254 nm; TR = 4.05 min (major), 8.67 min (minor)).  $^1\text{H NMR}$  (850 MHz,  $\text{CDCl}_3$ )  $\delta$  7.76 (d,  $J = 7.7$  Hz, 2H), 7.51 (d,  $J = 7.7$  Hz, 2H), 7.38 – 7.35 (m, 2H), 7.33 (d,  $J = 7.7$  Hz, 2H), 7.30 – 7.29 (m, 1H), 7.15 (s, 1H), 7.03 (s, 1H), 6.91 (s, 1H), 6.48 (d,  $J = 6.8$  Hz, 2H), 6.40 (d,  $J = 8.5$  Hz, 2H), 3.27 (s, 1H), 2.92 (d,  $J = 16.2$  Hz, 1H), 2.82 (s, 6H), 2.72 (d,  $J = 16.2$  Hz, 1H), 2.47 (s, 3H), 2.02 (s, 3H), 1.72 (s, 3H), 1.66 – 1.47 (m, 5H), 1.45 – 1.37 (m, 2H), 1.19 – 1.16 (m, 1H), 1.10 – 1.02 (m, 1H), 0.95 – 0.90 (m, 1H);  $^{13}\text{C NMR}$  (213 MHz,  $\text{CDCl}_3$ )  $\delta$  149.0, 144.6, 141.1, 139.5, 137.4, 137.3, 136.3(9), 136.3(5),



132.2, 129.7, 129.1, 128.6, 128.5, 126.9(3), 126.9(1), 126.6, 125.7, 125.3, 125.0, 121.7, 111.9, 55.8, 54.0, 40.7, 38.9, 36.7, 35.1, 26.0, 23.3, 21.6, 20.7, 20.6; IR (neat): 2930, 2852, 1610, 1506, 1464, 1371, 1265, 1128, 1102, 672, 588; HRESIMS Calcd for  $[C_{41}H_{44}N_2NaO_2S]^+$  ( $M + Na^+$ ) 651.3016, found 651.3020.

**(R)-N-(1-cyclohexyl-4-(4-(dimethylamino)phenyl)but-3-yn-2-yl)-N-((2,6-dimethyl-4-((trimethylsilyl)ethynyl)phenyl)ethynyl)-4-methylbenzenesulfonamide ((+)-1p)**

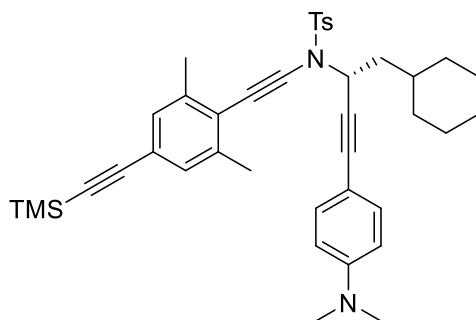

**(+)-1p**

Compound (+)-**1p** was prepared in 42% yield (54.5 mg) according to the general procedure. Pale yellow oil, (eluent: PE/DCM = 2/1).  $[\alpha]_D^{25} = +27.5^\circ$  ( $c = 1.0$ ,  $CHCl_3$ ). 97% ee (determined by HPLC: Chiralpak ADH Column, 5/95 *i*-PrOH/hexane, 1.0 mL/min, 254 nm; TR = 5.21 min (major), 6.66 min (minor)).

**(R)-4-(3'-(2,6-dimethyl-4-((trimethylsilyl)ethynyl)phenyl)-1'-tosyl-4',6'-dihydro-1'H-spiro[cyclohexane-1,5'-cyclopenta[*b*]pyrrol]-4'-yl)-*N,N*-dimethylaniline ((-)-2p)**

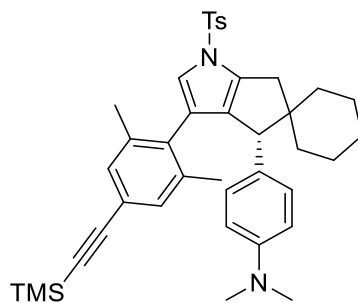

**(-)-2p**

Compound (-)-**2p** was prepared in 42% yield (54.5 mg) according to the general procedure. Pale yellow oil, (eluent: PE/DCM = 2/1).  $[\alpha]_D^{25} = -16.5^\circ$  ( $c = 1.0$ ,  $\text{CHCl}_3$ ). 95% ee (determined by HPLC: Chiralpak ADH Column, 5/95 *i*-PrOH/hexane, 1.0 mL/min, 254 nm; TR = 4.02 min (major), 9.18 min (minor)).  $^1\text{H}$  NMR (500 MHz,  $\text{CDCl}_3$ )  $\delta$  7.75 (d,  $J = 8.5$  Hz, 2H), 7.33 (d,  $J = 8.0$  Hz, 2H), 7.04 (s, 1H), 6.92 (s, 1H), 6.86 (s, 1H), 6.42 (d,  $J = 8.0$  Hz, 2H), 6.37 (d,  $J = 8.5$  Hz, 2H), 3.19 (s, 1H), 2.89 (d,  $J = 16.5$  Hz, 1H), 2.83 (s, 6H), 2.71 (d,  $J = 16.5$  Hz, 1H), 2.46 (s, 3H), 1.92 (s, 3H), 1.61 (s, 3H), 1.60 – 1.38 (m, 6H), 1.21 – 1.01 (m, 3H), 0.92 – 0.81 (m, 1H), 0.21 (s, 9H);  $^{13}\text{C}$  NMR (125 MHz,  $\text{CDCl}_3$ )  $\delta$  149.0, 144.6, 137.2, 137.1, 137.1, 136.4, 136.1, 133.9, 130.4, 130.0, 129.7, 129.0, 128.5, 126.6, 124.5, 121.5, 121.1, 111.9, 105.5, 93.2, 55.8, 53.9, 40.7, 39.0, 36.9, 35.1, 26.0, 23.3, 21.6, 20.3, 20.2, 0.0; IR (neat): 2927, 2851, 2150(s), 1614, 1519, 1372, 1174, 843, 813; HRESIMS Calcd for  $[\text{C}_{40}\text{H}_{48}\text{KN}_2\text{O}_2\text{SSi}]^+$  ( $\text{M} + \text{K}^+$ ) 687.2837, found 687.2820.

**(*R*)-*N*-(1-cyclohexyl-4-(4-(dimethylamino)phenyl)but-3-yn-2-yl)-*N*-((2,6-dimethoxyphenyl)ethynyl)-4-methylbenzenesulfonamide ((+)-**1q**)**

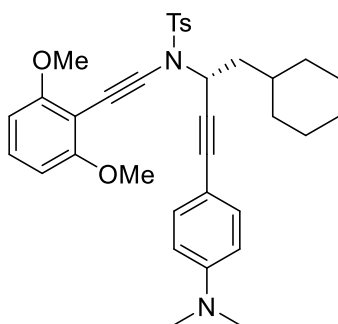

**(+)-**1q****

Compound (+)-**1q** was prepared in 46% yield (53.8 mg) according to the general procedure except at 30 °C. Pale yellow oil, (eluent: PE/EtOAc = 10/1).  $[\alpha]_D^{25} = +27.2^\circ$  ( $c = 1.0$ ,  $\text{CHCl}_3$ ). 54% ee (determined by HPLC: Chiralpak IE Column, 20/80 *i*-PrOH/hexane, 1.0 mL/min, 254 nm; TR = 22.91 min (major), 28.79 min (minor)).

**(*R*)-4-(3'-(2,6-dimethoxyphenyl)-1'-tosyl-4',6'-dihydro-1'*H*-spiro[cyclohexane-1,5'-cyclopenta[*b*]pyrrol]-4'-yl)-*N,N*-dimethylaniline ((-)-**2q**)**

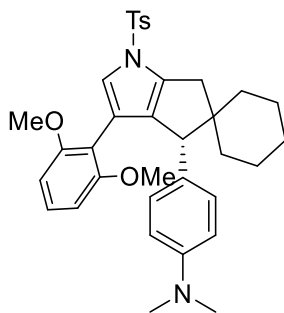

**(-)-2q**

Compound **(-)-2q** was prepared in 42% yield (49.0 mg) according to the general procedure except at 30 °C. Pale yellow oil, (eluent: PE/EtOAc = 10/1).  $[\alpha]_D^{25} = -6.8^\circ$  ( $c = 1.0$ ,  $\text{CHCl}_3$ ). 60% ee (determined by HPLC: Chiralpak IE Column, 30/70 *i*-PrOH/hexane, 1.0 mL/min, 254 nm; TR = 12.29 min (major), 17.84 min (minor)).  $^1\text{H}$  NMR (850 MHz,  $\text{CDCl}_3$ )  $\delta$  7.79 (d,  $J = 8.5$  Hz, 2H), 7.33 – 7.28 (m, 3H), 6.97 (t,  $J = 7.7$  Hz, 1H), 6.67 – 6.44 (m, 2H), 6.42 – 6.33 (m, 2H), 6.32 (d,  $J = 8.5$  Hz, 2H), 3.67 (s, 1H), 3.57 (s, 6H), 2.84 (d,  $J = 15.3$  Hz, 1H), 2.79 (s, 6H), 2.75 (d,  $J = 15.3$  Hz, 1H), 2.43 (s, 3H), 1.79 – 1.74 (m, 1H), 1.60 – 1.38 (m, 6H), 1.06 – 0.91 (m, 2H), 0.63 – 0.51 (m, 1H);  $^{13}\text{C}$  NMR (214 MHz,  $\text{CDCl}_3$ )  $\delta$  157.5, 148.8, 144.2, 136.8, 135.8, 134.7, 129.7, 129.1, 128.6, 127.9, 126.7, 124.2, 117.0, 111.8, 111.6, 103.7, 57.6, 55.6, 53.9, 40.9, 38.4, 36.3, 33.8, 26.0, 23.7, 23.0, 21.6; IR (neat): 2926, 2851, 1597, 1519, 1473, 1366, 1246, 1173, 1112, 813; HRESIMS Calcd for  $[\text{C}_{35}\text{H}_{40}\text{N}_2\text{NaO}_4\text{S}]^+$  ( $\text{M} + \text{Na}^+$ ) 607.2601, found 607.2620.

**(R)-N-(1-cyclohexyl-4-(4-(dimethylamino)phenyl)but-3-yn-2-yl)-4-methyl-N-(*o*-tolylethynyl)benzenesulfonamide ((+)-1r)**

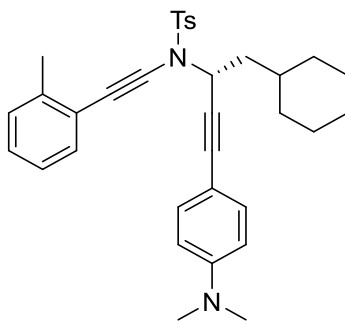

**(+)-1r**

Compound (+)-**1r** was prepared in 36% yield (38.7 mg) according to the general procedure. Pale yellow oil, (eluent: PE/DCM = 2/1).  $[\alpha]_D^{25} = +105.6^\circ$  ( $c = 1.0$ ,  $\text{CHCl}_3$ ). 97% ee (determined by HPLC: Chiralpak ODH Column, 3/97 *i*-PrOH/hexane, 1.0 mL/min, 254 nm; TR = 7.72 min (major), 8.74 min (minor)).

**(R)-N,N-dimethyl-4-(3'-(*o*-tolyl)-1'-tosyl-4',6'-dihydro-1'H-spiro[cyclohexane-1,5'-cyclopenta[*b*]pyrrol]-4'-yl)aniline ((-)-2r)**

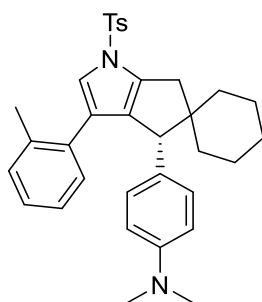

**(-)-2r**

Compound (-)-**2r** was prepared in 35% yield (37.7 mg) according to the general procedure. Pale yellow oil, (eluent: PE/DCM = 2/1).  $[\alpha]_D^{25} = -78.3^\circ$  ( $c = 1.0$ ,  $\text{CHCl}_3$ ). 92% ee (determined by HPLC: Chiralpak IE Column, 10/90 *i*-PrOH/hexane, 1.0 mL/min, 254 nm; TR = 10.04 min (minor), 12.59 min (major)).  $^1\text{H}$  NMR (500 MHz,  $\text{CDCl}_3$ )  $\delta$  7.77 (d,  $J = 8.0$  Hz, 2H), 7.32 (d,  $J = 8.0$  Hz, 2H), 7.09 (s, 1H), 7.05 (d,  $J = 7.5$  Hz, 1H), 7.03 – 6.96 (m, 1H), 6.93 – 6.86 (m, 1H), 6.86 – 6.80 (m, 1H), 6.56 (d,  $J = 7.0$  Hz, 2H), 6.45 (d,  $J = 9.0$  Hz, 2H), 3.53 (s, 1H), 2.88 (d,  $J = 16.0$  Hz, 1H), 2.84 (s, 6H), 2.71 (d,  $J = 16.0$  Hz, 1H), 2.44 (s, 3H), 2.21 (s, 3H), 1.69 – 1.39 (m, 7H), 1.20 – 1.15 (m, 1H), 1.06 – 0.97 (m, 1H), 0.90 – 0.85 (m, 1H);  $^{13}\text{C}$  NMR (150 MHz,  $\text{CDCl}_3$ )  $\delta$  148.9, 144.6, 136.9, 136.3, 135.4, 134.6, 133.1, 130.1, 129.8, 129.5, 129.1, 128.9, 126.6(2), 126.5(7), 125.9, 125.3, 121.9, 112.1, 56.4, 53.9, 40.7, 38.9, 36.3, 35.3, 26.0, 23.4, 23.3, 21.6, 21.1; IR (neat): 2925, 2852, 1679, 1612, 1519, 1449, 1370, 1186, 1174, 1133; HRESIMS Calcd for  $[\text{C}_{34}\text{H}_{38}\text{N}_2\text{NaO}_2\text{S}]^+$  ( $\text{M} + \text{Na}^+$ ) 561.2546, found 561.2556.

**(R)-N-(1-cyclohexyl-4-(4-(dimethylamino)phenyl)but-3-yn-2-yl)-N-((2-fluorophenyl)ethynyl)-4-methylbenzenesulfonamide ((+)-1s)**

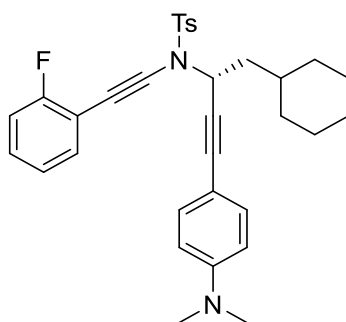

(+)-**1s**

Compound (+)-**1s** was prepared in 39% yield (42.4 mg) according to the general procedure employing **L8**. Pale yellow oil, (eluent: PE/DCM = 2/1).  $[\alpha]_{\text{D}}^{25} = +44.1^{\circ}$  ( $c = 1.0$ ,  $\text{CHCl}_3$ ). 86% ee (determined by HPLC: Chiralpak ADH Column, 5/95 *i*-PrOH/hexane, 1.0 mL/min, 254 nm; TR = 11.54 min (major), 17.18 min (minor)).

**(R)-4-(3'-(2-fluorophenyl)-1'-tosyl-4',6'-dihydro-1'H-spiro[cyclohexane-1,5'-cyclopenta[*b*]pyrrol]-4'-yl)-*N,N*-dimethylaniline ((-)-2s)**

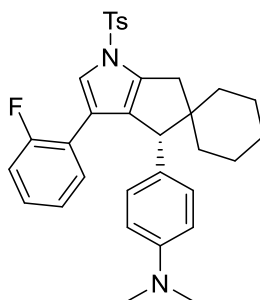

(-)-**2s**

Compound (-)-**2s** was prepared in 40% yield (43.4 mg) according to the general procedure employing **L8**. Pale yellow oil, (eluent: PE/DCM = 2/1).  $[\alpha]_{\text{D}}^{25} = -66.5^{\circ}$  ( $c = 1.0$ ,  $\text{CHCl}_3$ ). 84% ee (determined by HPLC: Chiralpak IE Column, 10/90 *i*-PrOH/hexane, 1.0 mL/min, 254 nm; TR = 11.99 min (major), 14.84 min (minor)).  $^1\text{H}$  NMR (500 MHz,  $\text{CDCl}_3$ )  $\delta$  7.78 (d,  $J = 8.5$  Hz, 2H), 7.60 (d,  $J = 3.0$  Hz, 1H), 7.32 (d,  $J = 8.0$  Hz, 2H), 7.16 – 7.14 (m, 1H), 7.05 – 6.98 (m, 1H), 6.98 – 6.93 (m, 1H), 7.86 – 7.80 (m, 1H), 6.79 – 6.60 (m, 2H), 6.57 – 6.49 (m, 2H), 3.71 (s, 1H), 2.90 (d,  $J = 16.0$  Hz, 1H), 2.85 (s, 6H), 2.67 (d,  $J = 16.0$  Hz, 1H), 2.42 (s, 3H), 1.65 – 1.43 (m, 6H), 1.22 – 1.14 (m, 2H), 0.99 – 0.81 (m, 2H);  $^{13}\text{C}$  NMR (100 MHz,  $\text{CDCl}_3$ )  $\delta$  159.7 (d,  $J = 249.2$  Hz), 149.1, 144.7, 137.3, 136.2, 132.7, 129.9, 129.1 (d,  $J = 3.9$  Hz), 128.5, 127.4 (d,  $J$

= 8.5 Hz), 126.7, 123.8 (d,  $J = 3.2$  Hz), 123.2 (d,  $J = 15.4$  Hz), 121.3 (d,  $J = 12.7$  Hz), 119.4 (d,  $J = 1.5$  Hz), 115.5 (d,  $J = 22.7$  Hz), 112.2, 57.2, 53.7, 40.6, 39.1, 36.0, 35.8, 26.0, 23.4, 23.3, 21.6;  $^{19}\text{F}$  NMR (376 MHz,  $\text{CDCl}_3$ )  $\delta$  -111.9 – -112.2 (m); IR (neat): 2925, 2853, 1615, 1519, 1488, 1369, 1174, 1102, 1005, 673; HRESIMS Calcd for  $[\text{C}_{33}\text{H}_{35}\text{FN}_2\text{NaO}_2\text{S}]^+$  ( $\text{M} + \text{Na}^+$ ) 565.2295, found 565.2289.

**(*R*)-*N*-((2-chlorophenyl)ethynyl)-*N*-(1-cyclohexyl-4-(4-(dimethylamino)phenyl)but-3-yn-2-yl)-4-methylbenzenesulfonamide ((+)-1t)**

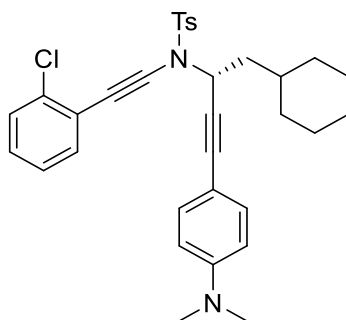

**(+)-1t**

Compound (+)-**1t** was prepared in 37% yield (41.4 mg) according to the general procedure employing **L8**. Pale yellow oil, (eluent: PE/DCM = 2/1).  $[\alpha]_{\text{D}}^{25} = +24.1^\circ$  ( $c = 1.0$ ,  $\text{CHCl}_3$ ). 95% ee (determined by HPLC: Chiralpak IE Column, 10/90 *i*-PrOH/hexane, 1.0 mL/min, 254 nm; TR = 15.44 min (major), 15.99 min (minor)).

**(*R*)-4-(3'-(2-chlorophenyl)-1'-tosyl-4',6'-dihydro-1'*H*-spiro[cyclohexane-1,5'-cyclopenta[*b*]pyrrol]-4'-yl)-*N,N*-dimethylaniline ((-)-2t)**

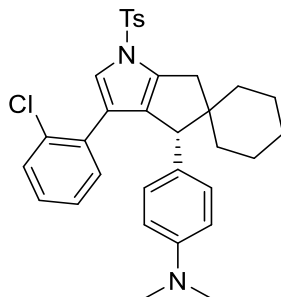

**(-)-2t**

Compound (-)-**2t** was prepared in 44% yield (49.2 mg) according to the general procedure employing **L8**. Pale yellow oil, (eluent: PE/DCM = 2/1).  $[\alpha]_{\text{D}}^{25} = -19.5^\circ$  ( $c =$

1.0, CHCl<sub>3</sub>). 86% ee (determined by HPLC: Chiralpak IE Column, 10/90 *i*-PrOH/hexane, 1.0 mL/min, 254 nm; TR = 10.27 min (minor), 11.77 min (major)). <sup>1</sup>H NMR (600 MHz, CDCl<sub>3</sub>) δ 7.78 (d, *J* = 8.4 Hz, 2H), 7.45 (dd, *J* = 7.8, 0.6 Hz, 1H), 7.40 (s, 1H), 7.33 (d, *J* = 8.4 Hz, 2H), 6.99 – 6.96 (m, 1H), 6.96 – 6.90 (m, 1H), 6.88 (dd, *J* = 7.8, 1.8 Hz, 1H), 6.68 – 6.50 (m, 2H), 6.45 (d, *J* = 8.4 Hz, 2H), 3.63 (s, 1H), 2.86 – 2.81 (m, 7H), 2.73 (d, *J* = 15.6 Hz, 1H), 2.44 (s, 3H), 1.66 – 1.49 (m, 4H), 1.48 – 1.40 (m, 2H), 1.23 – 1.09 (m, 2H), 1.03 – 0.97 (m, 1H), 0.89 – 0.83 (m, 1H); <sup>13</sup>C NMR (150 MHz, CDCl<sub>3</sub>) δ 149.0, 144.7, 136.8, 136.3, 134.5, 134.1, 133.0, 131.1, 129.9, 129.2, 128.7, 127.9, 126.8, 126.7, 124.9, 122.9, 122.5, 112.0, 56.4, 54.0, 40.6, 38.8, 36.4, 35.1, 26.0, 23.4, 23.3, 21.6; IR (neat): 2925, 2853, 1611, 1514, 1450, 1370, 1303, 1174, 1122, 931; HRESIMS Calcd for [C<sub>33</sub>H<sub>35</sub>ClN<sub>2</sub>KO<sub>2</sub>S]<sup>+</sup> (M + K<sup>+</sup>) 597.1739, found 597.1733.

**(*R*)-*N*-((2-bromophenyl)ethynyl)-*N*-(1-cyclohexyl-4-(4-(dimethylamino)phenyl)but-3-yn-2-yl)-4-methylbenzenesulfonamide ((+)-**1u**)**

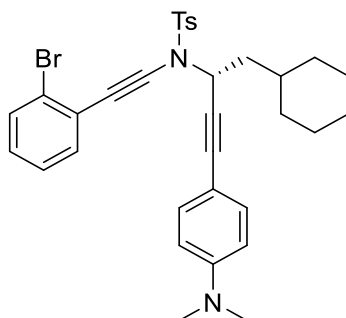

**(+)-**1u****

Compound (+)-**1u** was prepared in 37% yield (44.7 mg) according to the general procedure employing **L8**. Pale yellow oil, (eluent: PE/DCM = 2/1). [α]<sub>D</sub><sup>25</sup> = +152.3° (c = 1.0, CHCl<sub>3</sub>). 98% ee (determined by HPLC: Chiralpak ADH Column, 5/95 *i*-PrOH/hexane, 1.0 mL/min, 254 nm; TR = 11.54 min (minor), 20.50 min (major)).

**(*R*)-4-(3'-(2-bromophenyl)-1'-tosyl-4',6'-dihydro-1'*H*-spiro[cyclohexane-1,5'-cyclopenta[*b*]pyrrol]-4'-yl)-*N,N*-dimethylaniline ((-)-**2u**)**

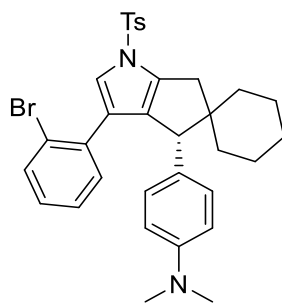

**(-)-2u**

Compound **(-)-2u** was prepared in 40% yield (48.3 mg) according to the general procedure employing **L8**. Pale yellow oil, (eluent: PE/DCM = 2/1).  $[\alpha]_D^{25} = -55.3^\circ$  ( $c = 1.0$ ,  $\text{CHCl}_3$ ). 90% ee (determined by HPLC: Chiralpak IE Column, 10/90 *i*-PrOH/hexane, 1.0 mL/min, 254 nm; TR = 10.35 min (minor), 12.24 min (major)).  $^1\text{H}$  NMR (500 MHz,  $\text{CDCl}_3$ )  $\delta$  7.78 (d,  $J = 8.5$  Hz, 2H), 7.44 (dd,  $J = 8.0, 1.0$  Hz, 1H), 7.40 (s, 1H), 7.32 (d,  $J = 8.0$  Hz, 2H), 6.97 (t,  $J = 9.0$  Hz, 1H), 6.94 – 6.85 (m, 2H), 6.67 – 6.51 (m, 2H), 6.45 (d,  $J = 9.0$  Hz, 2H), 3.63 (s, 1H), 2.91 – 2.85 (m, 1H), 2.84 (s, 6H), 2.73 (d,  $J = 16.0$  Hz, 1H), 2.43 (s, 3H), 1.67 – 1.39 (m, 6H), 1.23 – 1.11 (m, 2H), 1.04 – 0.96 (m, 1H), 0.92 – 0.84 (m, 1H);  $^{13}\text{C}$  NMR (125 MHz,  $\text{CDCl}_3$ )  $\delta$  149.0, 144.7, 136.8, 136.3, 134.5, 134.1, 133.0, 131.1, 129.9, 129.2, 128.7, 127.9, 126.8, 126.7, 124.9, 122.9, 122.5, 112.0, 56.4, 54.0, 40.6, 38.8, 36.4, 35.1, 26.0, 23.4, 23.3, 21.6; IR (neat): 2930, 2852, 1610, 1558, 1512, 1372, 1265, 1109, 1051, 811; HRESIMS Calcd for  $[\text{C}_{33}\text{H}_{35}\text{BrN}_2\text{NaO}_2\text{S}]^+$  ( $\text{M} + \text{Na}^+$ ) 625.1495, found 625.1488.

**(R)-N-(1-cyclohexyl-4-(4-(dimethylamino)phenyl)but-3-yn-2-yl)-4-methyl-N-(*m*-tolylethynyl)benzenesulfonamide ((+)-1v)**

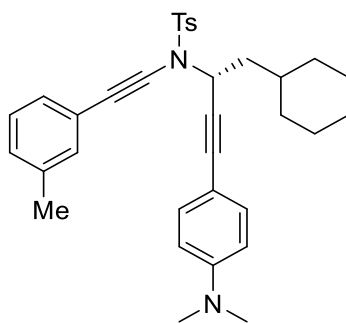

**(+)-1v**



Compound (+)-**1v** was prepared in 33% yield (35.6 mg) according to the general procedure. Pale yellow oil, (eluent: PE/DCM = 2/1).  $[\alpha]_D^{25} = +76.6^\circ$  (c = 1.0, CHCl<sub>3</sub>). 91% ee (determined by HPLC: Chiralpak ADH Column, 10/90 *i*-PrOH/hexane, 1.0 mL/min, 254 nm; TR = 5.06 min (minor), 9.31 min (major)).

**(*R*)-*N,N*-dimethyl-4-(3'-(*m*-tolyl)-1'-tosyl-4',6'-dihydro-1'*H*-spiro[cyclohexane-1,5'-cyclopenta[*b*]pyrrol]-4'-yl)aniline ((-)-2v)**

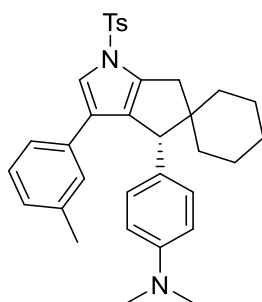

**(-)-2v**

Compound (-)-**2v** was prepared in 31% yield (33.4 mg) according to the general procedure. Pale yellow oil, (eluent: PE/DCM = 2/1).  $[\alpha]_D^{25} = -11.2^\circ$  (c = 1.0, CHCl<sub>3</sub>). 91% ee (determined by HPLC: Chiralpak IE Column, 10/90 *i*-PrOH/hexane, 1.0 mL/min, 254 nm; TR = 17.34 min (major), 21.14 min (minor)). <sup>1</sup>H NMR (500 MHz, CDCl<sub>3</sub>)  $\delta$  7.76 (d, *J* = 8.5 Hz, 2H), 7.37 (s, 1H), 7.31 (d, *J* = 8.0 Hz, 2H), 7.04 – 6.98 (m, 3H), 6.91 – 6.86 (m, 1H), 6.84 – 6.39 (m, 4H), 3.68 (s, 1H), 2.89 (d, *J* = 16.5 Hz, 1H), 2.86 (s, 6H), 2.65 (d, *J* = 16.0 Hz, 1H), 2.43 (s, 3H), 2.16 (s, 3H), 1.63 – 1.43 (m, 6H), 1.22 – 1.15 (m, 2H), 1.08 – 0.94 (m, 2H); <sup>13</sup>C NMR (150 MHz, CDCl<sub>3</sub>)  $\delta$  149.1, 144.7, 137.8, 137.8, 136.3, 133.3(1), 132.9(7), 129.9, 128.3, 127.1, 127.0, 126.7, 126.1, 123.0, 119.6, 112.3, 56.7, 53.7, 40.7, 39.2, 36.3, 35.9, 26.0, 23.5, 23.3, 21.6, 21.3; IR (neat): 2929, 2852, 1610, 1558, 1512, 1371, 1265, 1051, 1026, 768; HRESIMS Calcd for [C<sub>34</sub>H<sub>38</sub>N<sub>2</sub>NaO<sub>2</sub>S]<sup>+</sup> (M + Na<sup>+</sup>) 561.2546, found 561.2546.

**(*R*)-*N*-(1-cyclohexyl-4-(4-(dimethylamino)phenyl)but-3-yn-2-yl)-*N*-((3-fluorophenyl)ethynyl)-4-methylbenzenesulfonamide ((+)-1w)**

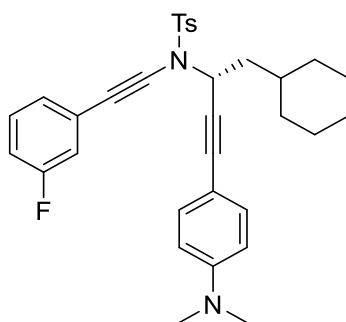

(+)-**1w**

Compound (+)-**1w** was prepared in 39% yield (42.4 mg) according to the general procedure. Pale yellow oil, (eluent: PE/DCM = 2/1).  $[\alpha]_{\text{D}}^{25} = +17.5^{\circ}$  ( $c = 1.0$ ,  $\text{CHCl}_3$ ). 82% ee (determined by HPLC: Chiralpak ADH Column, 10/90 *i*-PrOH/hexane, 1.0 mL/min, 254 nm; TR = 5.97 min (minor), 8.86 min (major)).

**(R)-4-(3'-(3-fluorophenyl)-1'-tosyl-4',6'-dihydro-1'H-spiro[cyclohexane-1,5'-cyclopenta[*b*]pyrrol]-4'-yl)-*N,N*-dimethylaniline ((-)-2w)**

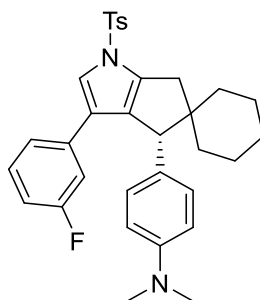

(-)-**2w**

Compound (-)-**2w** was prepared in 41% yield (44.5 mg) according to the general procedure. Pale yellow oil, (eluent: PE/DCM = 2/1).  $[\alpha]_{\text{D}}^{25} = -11.7^{\circ}$  ( $c = 1.0$ ,  $\text{CHCl}_3$ ). 82% ee (determined by HPLC: Chiralpak ADH Column, 10/90 *i*-PrOH/hexane, 1.0 mL/min, 254 nm; TR = 6.10 min (major), 10.73 min (minor)).  $^1\text{H}$  NMR (500 MHz,  $\text{CDCl}_3$ )  $\delta$  7.78 (d,  $J = 8.5$  Hz, 2H), 7.39 (s, 1H), 7.33 (d,  $J = 8.0$  Hz, 2H), 7.11 – 7.05 (m, 1H), 7.00 (d,  $J = 8.0$  Hz, 1H), 6.93 – 6.87 (m, 1H), 6.87 – 6.25 (m, 5H), 3.67 (s, 1H), 2.94 – 2.84 (m, 7H), 2.65 (d,  $J = 16.0$  Hz, 1H), 2.43 (s, 3H), 1.69 – 1.40 (m, 7H), 1.19 – 0.96 (m, 3H);  $^{13}\text{C}$  NMR (100 MHz,  $\text{CDCl}_3$ )  $\delta$  162.9 (d,  $J = 244.6$  Hz), 149.2, 144.9, 138.1, 136.2, 135.8 (d,  $J = 8.3$  Hz), 132.5, 130.0, 129.7 (d,  $J = 8.5$  Hz), 129.2, 128.5, 126.7, 124.9 (d,  $J = 2.5$  Hz), 121.6 (d,  $J = 2.7$  Hz), 120.0, 113.1 (d,  $J = 19.9$  Hz),

112.9 (d,  $J = 21.1$  Hz), 112.3, 56.6, 53.8, 40.6, 39.2, 36.3, 35.8, 26.0, 23.5, 23.3, 21.6;  $^{19}\text{F}$  NMR (376 MHz,  $\text{CDCl}_3$ )  $\delta$  -113.3 – -113.5 (m); IR (neat): 2925, 2853, 1611, 1513, 1370, 1303, 1174, 1122, 1051, 672; HRESIMS Calcd for  $[\text{C}_{33}\text{H}_{35}\text{FN}_2\text{NaO}_2\text{S}]^+$  ( $\text{M} + \text{Na}^+$ ) 565.2295, found 565.2287.

**(*R*)-*N*-((3-chlorophenyl)ethynyl)-*N*-(1-cyclohexyl-4-(4-(dimethylamino)phenyl)but-3-yn-2-yl)-4-methylbenzenesulfonamide ((+)-**1x**)**

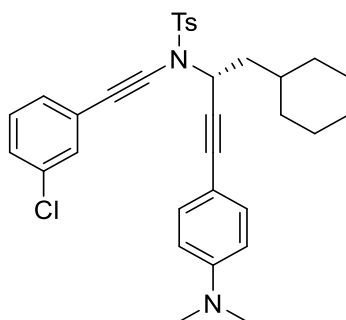

**(+)-**1x****

Compound (+)-**1x** was prepared in 40% yield (44.7 mg) according to the general procedure. Pale yellow oil, (eluent: PE/DCM = 2/1).  $[\alpha]_{\text{D}}^{25} = +8.3^\circ$  ( $c = 1.0$ ,  $\text{CHCl}_3$ ). 95% ee (determined by HPLC: Chiralpak ADH Column, 10/90 *i*-PrOH/hexane, 1.0 mL/min, 254 nm; TR = 6.15 min (minor), 8.97 min (major)).

**(*R*)-4-(3'-(3-chlorophenyl)-1'-tosyl-4',6'-dihydro-1'*H*-spiro[cyclohexane-1,5'-cyclopenta[*b*]pyrrol]-4'-yl)-*N,N*-dimethylaniline ((-)-**2x**)**

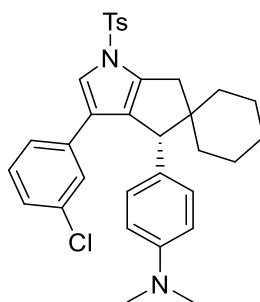

**(-)-**2x****

Compound (-)-**2x** was prepared in 42% yield (47.0 mg) according to the general procedure. Pale yellow oil, (eluent: PE/DCM = 2/1).  $[\alpha]_{\text{D}}^{25} = -19.3^\circ$  ( $c = 1.0$ ,  $\text{CHCl}_3$ ). 90% ee (determined by HPLC: Chiralpak ADH Column, 10/90 *i*-PrOH/hexane, 1.0

mL/min, 254 nm; TR = 5.75 min (major), 9.71 min (minor)). <sup>1</sup>H NMR (400 MHz, CDCl<sub>3</sub>) δ 7.77 (d, *J* = 8.4 Hz, 2H), 7.37 (s, 1H), 7.33 (d, *J* = 8.0 Hz, 2H), 7.21 – 7.15 (m, 1H), 7.12 – 6.95 (m, 3H), 6.94 – 6.35 (m, 4H), 3.67 (s, 1H), 2.90 (d, *J* = 16.4 Hz, 1H), 2.87 (s, 6H), 2.67 (d, *J* = 16.4 Hz, 1H), 2.44 (s, 3H), 1.64 – 1.44 (m, 6H), 1.24 – 1.15 (m, 2H), 1.06 – 0.90 (m, 2H); <sup>13</sup>C NMR (100 MHz, CDCl<sub>3</sub>) δ 149.3, 144.9, 138.1, 136.2, 135.4, 134.2, 132.6, 130.0, 129.5, 129.3, 128.6, 126.8, 126.3, 126.2, 124.6, 124.1, 120.0, 112.3, 56.6, 53.8, 40.6, 39.2, 36.4, 35.8, 26.0, 23.5, 23.3, 21.6; IR (neat): 2925, 2854, 1615, 1519, 1488, 1369, 1174, 1124, 1005; HRESIMS Calcd for [C<sub>33</sub>H<sub>35</sub>ClN<sub>2</sub>KO<sub>2</sub>S]<sup>+</sup> (M + K<sup>+</sup>) 597.1739, found 597.1742.

**(*R*)-*N*-((3-bromophenyl)ethynyl)-*N*-(1-cyclohexyl-4-(4-(dimethylamino)phenyl)but-3-yn-2-yl)-4-methylbenzenesulfonamide ((+)-**1y**)**

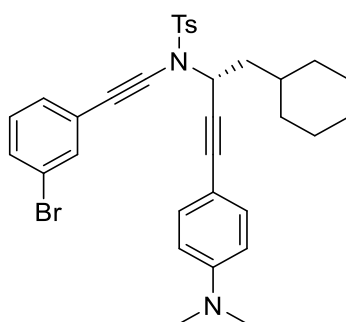

**(+)-**1y****

Compound (+)-**1y** was prepared in 39% yield (47.1 mg) according to the general procedure. Pale yellow oil, (eluent: PE/DCM = 2/1). [ $\alpha$ ]<sub>D</sub><sup>25</sup> = +19.6° (c = 1.0, CHCl<sub>3</sub>). 96% ee (determined by HPLC: Chiralpak ADH Column, 10/90 *i*-PrOH/hexane, 1.0 mL/min, 254 nm; TR = 6.41 min (minor), 9.27 min (major)).

**(*R*)-4-(3'-(3-bromophenyl)-1'-tosyl-4',6'-dihydro-1'*H*-spiro[cyclohexane-1,5'-cyclopenta[*b*]pyrrol]-4'-yl)-*N,N*-dimethylaniline ((-)-**2y**)**

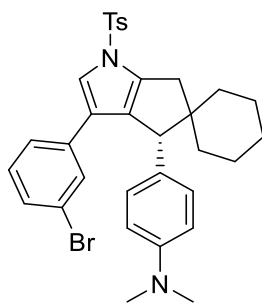

**(-)-2y**

Compound **(-)-2y** was prepared in 42% yield (50.7 mg) according to the general procedure. Pale yellow oil, (eluent: PE/DCM = 2/1).  $[\alpha]_{\text{D}}^{25} = -24.7^\circ$  ( $c = 1.0$ ,  $\text{CHCl}_3$ ). 88% ee (determined by HPLC: Chiralpak ADH Column, 10/90 *i*-PrOH/hexane, 1.0 mL/min, 254 nm; TR = 5.92 min (major), 9.60 min (minor)).  $^1\text{H}$  NMR (600 MHz,  $\text{CDCl}_3$ )  $\delta$  7.77 (d,  $J = 8.4$  Hz, 2H), 7.42 – 7.29 (m, 4H), 7.17 (dd,  $J = 7.8, 0.6$  Hz, 1H), 7.12 (d,  $J = 7.8$  Hz, 1H), 7.00 – 6.95 (m, 1H), 6.95 – 6.15 (m, 4H), 3.67 (s, 1H), 2.90 (d,  $J = 16.2$  Hz, 1H), 2.87 (s, 6H), 2.67 (d,  $J = 16.2$  Hz, 1H), 2.44 (s, 3H), 1.66 – 1.42 (m, 7H), 1.10 – 1.02 (m, 1H), 1.02 – 0.92 (m, 1H), 0.91 – 0.81 (m, 1H).  $^{13}\text{C}$  NMR (150 MHz,  $\text{CDCl}_3$ )  $\delta$  149.2, 144.9, 138.0, 136.1, 135.6, 132.5, 130.0, 129.8, 129.2, 129.0, 128.5, 126.7, 124.5, 124.4, 122.5, 120.0, 112.3, 56.6, 53.7, 40.6, 39.2, 36.4, 35.8, 26.0, 23.4, 23.3, 21.6; IR (neat): 2924, 2852, 1614, 1519, 1369, 1187, 1125, 1100, 673; HRESIMS Calcd for  $[\text{C}_{33}\text{H}_{35}\text{BrN}_2\text{NaO}_2\text{S}]^+$  ( $\text{M} + \text{Na}^+$ ) 625.1495, found 625.1499.

**(R)-N-((4-chlorophenyl)ethynyl)-N-(1-cyclohexyl-4-(4-(dimethylamino)phenyl)but-3-yn-2-yl)-4-methylbenzenesulfonamide ((+)-1z)**

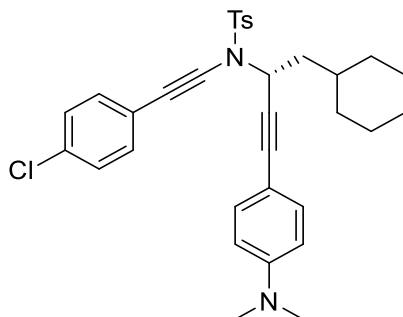

**(+)-1z**

Compound **(+)-1z** was prepared in 42% yield (47.0 mg) according to the general procedure. Pale yellow oil, (eluent: PE/DCM = 2/1).  $[\alpha]_{\text{D}}^{25} = +16.4^\circ$  ( $c = 1.0$ ,  $\text{CHCl}_3$ ).

82% ee (determined by HPLC: Chiralpak ADH Column, 10/90 *i*-PrOH/hexane, 1.0 mL/min, 254 nm; TR = 7.80 min (minor), 10.27 min (major)).

**(*R*)-4-(3'-(4-chlorophenyl)-1'-tosyl-4',6'-dihydro-1'*H*-spiro[cyclohexane-1,5'-cyclopenta[*b*]pyrrol]-4'-yl)-*N,N*-dimethylaniline ((-)-2z)**

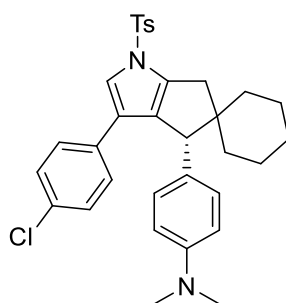

**(-)-2z**

Compound (-)-**2z** was prepared in 48% yield (53.4 mg) according to the general procedure. Pale yellow oil, (eluent: PE/DCM = 2/1).  $[\alpha]_D^{25} = -11.3^\circ$  ( $c = 1.0$ ,  $\text{CHCl}_3$ ). 75% ee (determined by HPLC: Chiralpak IG Column, 50/50 *i*-PrOH/hexane, 1.0 mL/min, 254 nm; TR = 6.69 min (major), 15.05 min (minor)).  $^1\text{H}$  NMR (500 MHz,  $\text{CDCl}_3$ )  $\delta$  7.77 (d,  $J = 8.5$  Hz, 2H), 7.36 (s, 1H), 7.33 (d,  $J = 8.0$  Hz, 2H), 7.15 – 7.07 (m, 4H), 6.99 – 6.83 (m, 1H), 6.82 – 6.32 (m, 4H), 3.65 (d,  $J = 1.0$  Hz, 1H), 2.90 (d,  $J = 16.0$  Hz, 1H), 2.87 (s, 6H), 2.65 (d,  $J = 16.0$  Hz, 1H), 2.43 (s, 3H), 1.69 – 1.44 (m, 6H), 1.23 – 1.16 (m, 2H), 1.07 – 0.92 (m, 2H);  $^{13}\text{C}$  NMR (125 MHz,  $\text{CDCl}_3$ )  $\delta$  149.2, 144.8, 138.1, 136.2, 132.4, 132.0(3), 132.0(1), 130.0, 128.5(3), 128.4(7), 127.2, 126.7, 124.8, 119.6, 112.2, 56.7, 53.8, 40.5, 39.2, 36.3, 35.8, 26.0, 23.4, 23.3, 21.6; IR (neat): 2926, 2851, 1610, 1558, 1397, 1371, 1175, 1103, 1003, 813; HRESIMS Calcd for  $[\text{C}_{33}\text{H}_{35}\text{ClKN}_2\text{O}_2\text{S}]^+$  ( $\text{M} + \text{K}^+$ ) 597.1739, found 597.1731.

**(*R*)-*N*-((4-bromophenyl)ethynyl)-*N*-(1-cyclohexyl-4-(4-(dimethylamino)phenyl)but-3-yn-2-yl)-4-methylbenzenesulfonamide ((+)-1aa)**

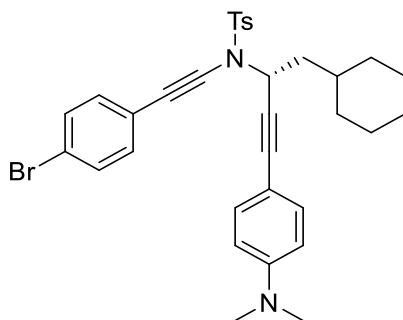

(+)-**1aa**

Compound (+)-**1aa** was prepared in 39% yield (47.1 mg) according to the general procedure. Pale yellow oil, (eluent: PE/DCM = 2/1).  $[\alpha]_D^{25} = +5.9^\circ$  ( $c = 1.0$ ,  $\text{CHCl}_3$ ). 78% ee (determined by HPLC: Chiralpak ADH Column, 10/90 *i*-PrOH/hexane, 1.0 mL/min, 254 nm; TR = 8.12 min (minor), 11.29 min (major)).

**(R)-4-(3'-(4-bromophenyl)-1'-tosyl-4',6'-dihydro-1'H-spiro[cyclohexane-1,5'-cyclopenta[*b*]pyrrol]-4'-yl)-*N,N*-dimethylaniline ((-)-2aa)**

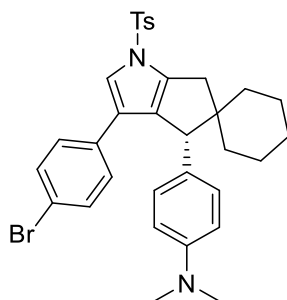

(-)-**2aa**

Compound (-)-**2aa** was prepared in 41% yield (49.5 mg) according to the general procedure. Pale yellow oil, (eluent: PE/DCM = 2/1).  $[\alpha]_D^{25} = -41.2^\circ$  ( $c = 1.0$ ,  $\text{CHCl}_3$ ). 80% ee (determined by HPLC: Chiralpak ADH Column, 40/60 *i*-PrOH/hexane, 1.0 mL/min, 254 nm; TR = 6.01 min (major), 19.19 min (minor)).  $^1\text{H}$  NMR (500 MHz,  $\text{CDCl}_3$ )  $\delta$  7.77 (d,  $J = 8.5$  Hz, 2H), 7.37 (s, 1H), 7.33 (d,  $J = 8.0$  Hz, 2H), 7.24 (d,  $J = 9.0$  Hz, 2H), 7.06 (d,  $J = 8.5$  Hz, 2H), 6.98 – 6.16 (m, 4H), 3.65 (s, 1H), 2.90 (d,  $J = 16.0$  Hz, 1H), 2.87 (s, 6H), 2.65 (d,  $J = 16.0$  Hz, 1H), 2.43 (s, 3H), 1.65 – 1.41 (m, 6H), 1.23 – 1.15 (m, 2H), 1.03 – 0.86 (m, 2H);  $^{13}\text{C}$  NMR (150 MHz,  $\text{CDCl}_3$ )  $\delta$  149.1, 144.9, 138.1, 136.1, 132.5, 132.3, 131.4, 130.0, 128.5, 127.6, 126.7, 124.8, 120.1, 119.6, 112.2, 56.7, 53.8, 40.5, 39.2, 36.2, 35.8, 26.0, 23.4, 23.3, 21.6; IR (neat): 2924, 2854, 1620,

1519, 1369, 1174, 1124, 1102, 1005, 816; HRESIMS Calcd for  $[C_{33}H_{35}BrN_2NaO_2S]^+$   
(M + Na<sup>+</sup>) 625.1495, found 625.1489.

**(R)-N-(1-cyclohexyl-4-(4-(dimethylamino)phenyl)but-3-yn-2-yl)-4-methyl-N-((4-(trifluoromethyl)phenyl)ethynyl)benzenesulfonamide ((+)-1ab)**

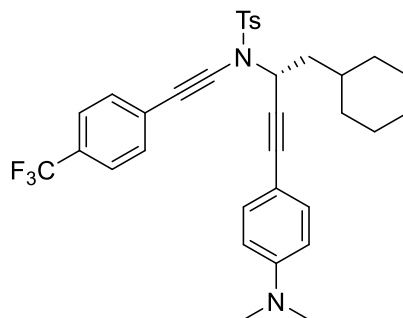

**(+)-1ab**

Compound (+)-**1ab** was prepared in 41% yield (48.6 mg) according to the general procedure. Pale yellow oil, (eluent: PE/DCM = 2/1).  $[\alpha]_D^{25} = +21.7^\circ$  (c = 1.0, CHCl<sub>3</sub>). 74% ee (determined by HPLC: Chiralpak ADH Column, 10/90 *i*-PrOH/hexane, 1.0 mL/min, 254 nm; TR = 6.39 min (minor), 9.16 min (major)).

**(R)-N,N-dimethyl-4-(1'-tosyl-3'-(4-(trifluoromethyl)phenyl)-4',6'-dihydro-1'H-spiro[cyclohexane-1,5'-cyclopenta[*b*]pyrrol]-4'-yl)aniline ((-)-2ab)**

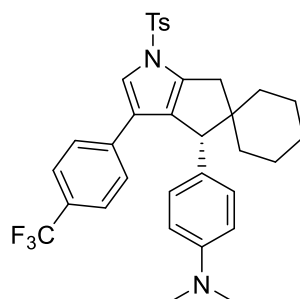

**(-)-2ab**

Compound (-)-**2ab** was prepared in 42% yield (49.7 mg) according to the general procedure. Pale yellow oil, (eluent: PE/DCM = 2/1).  $[\alpha]_D^{25} = -16.4^\circ$  (c = 1.0, CHCl<sub>3</sub>). 74% ee (determined by HPLC: Chiralpak ADH Column, 40/60 *i*-PrOH/hexane, 1.0 mL/min, 254 nm; TR = 4.52 min (major), 19.14 min (minor)). <sup>1</sup>H NMR (500 MHz, CDCl<sub>3</sub>) δ 7.79 (d, *J* = 8.5 Hz, 2H), 7.45 (s, 1H), 7.41 – 7.32 (m, 4H), 7.30 (d, *J* = 8.0



Hz, 2H), 7.11 – 6.17 (m, 4H), 3.68 (s, 1H), 2.91 (d,  $J = 16.0$  Hz, 1H), 2.88 (s, 6H), 2.66 (d,  $J = 16.0$  Hz, 1H), 2.44 (s, 3H), 1.65 – 1.43 (m, 6H), 1.24 – 1.16 (m, 2H), 1.05 – 0.91 (m, 2H);  $^{13}\text{C}$  NMR (150 MHz,  $\text{CDCl}_3$ )  $\delta$  149.2, 145.0, 138.3, 137.1, 136.1, 132.4, 130.0, 128.1 (q,  $J = 32.2$  Hz), 126.8, 126.0, 125.3 (q,  $J = 3.8$  Hz), 125.1, 124.5, 123.3, 120.4, 112.2, 56.7, 53.9, 40.5, 39.2, 36.2, 35.8, 26.0, 23.4, 23.3, 21.7;  $^{19}\text{F}$  NMR (376 MHz,  $\text{CDCl}_3$ )  $\delta$  -62.5 (s); IR (neat): 2923, 2850, 1614, 1518, 1447, 1325, 1174, 1125, 1068, 814; HRESIMS Calcd for  $[\text{C}_{34}\text{H}_{35}\text{F}_3\text{N}_2\text{NaO}_2\text{S}]^+$  ( $\text{M} + \text{Na}^+$ ) 615.2264, found 615.2254.

**(*R*)-*N*-(1-cyclohexyl-4-(4-(dimethylamino)phenyl)but-3-yn-2-yl)-*N*-(hex-1-yn-1-yl)-4-methylbenzenesulfonamide ((+)-1ac)**

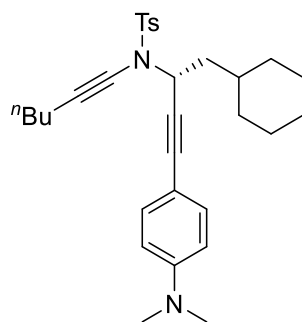

**(+)-1ac**

Compound (+)-**1ac** was prepared in 46% yield (46.5 mg) according to the general procedure at 15 °C. Pale yellow oil, (eluent: PE/DCM = 2/1).  $[\alpha]_{\text{D}}^{25} = +28.8^\circ$  ( $c = 1.0$ ,  $\text{CHCl}_3$ ). 97% ee (determined by HPLC: Chiralpak IE Column, 10/90 *i*-PrOH/hexane, 1.0 mL/min, 254 nm; TR = 5.25 min (minor), 8.12 min (major)).

**(*R*)-4-(3'-butyl-1'-tosyl-4',6'-dihydro-1'*H*-spiro[cyclohexane-1,5'-cyclopenta[*b*]pyrrol]-4'-yl)-*N,N*-dimethylaniline ((-)-2ac)**

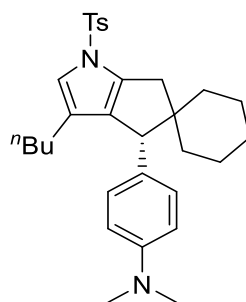

**(-)-2ac**

Compound (-)-**2ac** was prepared in 49% yield (49.5 mg) according to the general procedure at 15 °C. Pale yellow oil, (eluent: PE/DCM = 2/1).  $[\alpha]_D^{25} = -90.6^\circ$  ( $c = 1.0$ ,  $\text{CHCl}_3$ ). 90% ee (determined by HPLC: Chiralpak IE Column, 2/98 *i*-PrOH/hexane, 1.0 mL/min, 254 nm; TR = 7.18 min (minor), 9.15 min (major)).  $^1\text{H}$  NMR (500 MHz,  $\text{CDCl}_3$ )  $\delta$  7.70 (d,  $J = 8.5$  Hz, 2H), 7.30 (d,  $J = 8.0$  Hz, 2H), 6.79 (s, 1H), 6.78 – 6.24 (m, 4H), 3.47 (s, 1H), 2.89 (s, 6H), 2.79 (d,  $J = 16.0$  Hz, 1H), 2.69 (d,  $J = 16.5$  Hz, 1H), 2.43 (s, 3H), 2.06 – 1.92 (m, 2H), 1.65 – 1.38 (m, 7H), 1.22 – 1.05 (m, 6H), 0.85 – 0.76 (m, 1H), 0.70 (t,  $J = 7.5$  Hz, 3H);  $^{13}\text{C}$  NMR (125 MHz,  $\text{CDCl}_3$ )  $\delta$  149.1, 144.2, 136.6(3), 136.6(2), 134.2, 129.7, 129.3, 128.9, 126.8, 126.5, 120.4, 112.1, 55.8, 53.5, 40.7, 39.2, 37.0, 35.1, 30.9, 25.9, 25.3, 23.5, 23.3, 22.0, 21.6, 13.7; IR (neat): 2927, 2853, 1615, 1519, 1447, 1368, 1187, 1173, 1126, 814; HRESIMS Calcd for  $[\text{C}_{31}\text{H}_{40}\text{N}_2\text{NaO}_2\text{S}]^+$  ( $\text{M} + \text{Na}^+$ ) 527.2703, found 527.2712.

**(*R*)-*N*-(1-cyclopentyl-4-(4-(dimethylamino)phenyl)but-3-yn-2-yl)-*N*-((2,6-dimethylphenyl)ethynyl)-4-methylbenzenesulfonamide ((+)-**1af**)**

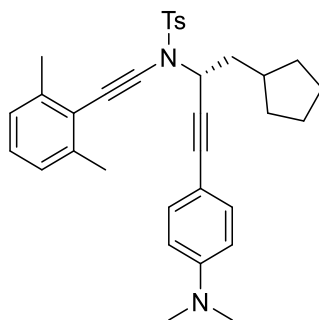

**(+)-**1af****

Compound (+)-**1af** was prepared in 41% yield (44.1 mg) according to the general procedure. Pale yellow oil, (eluent: PE/DCM = 2/1).  $[\alpha]_D^{25} = +129.9^\circ$  ( $c = 1.0$ ,  $\text{CHCl}_3$ ). 95% ee (determined by HPLC: Chiralpak IE Column, 3/97 *i*-PrOH/hexane, 1.0 mL/min, 254 nm; TR = 22.62 min (minor), 24.46 min (major)).

**(*R*)-4-(3'-(2,6-dimethylphenyl)-1'-tosyl-4',6'-dihydro-1'*H*-spiro[cyclopentane-1,5'-cyclopenta[*b*]pyrrol]-4'-yl)-*N,N*-dimethylaniline ((-)-**2af**)**

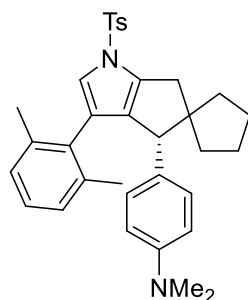

**(-)-2af**

Compound **(-)-2af** was prepared in 42% yield (45.2 mg) according to the general procedure. Pale yellow oil, (eluent: PE/DCM = 2/1).  $[\alpha]_D^{25} = -144.0^\circ$  ( $c = 1.0$ ,  $\text{CHCl}_3$ ). 93% ee (determined by HPLC: Chiralpak IE Column, 3/97 *i*-PrOH/hexane, 1.0 mL/min, 254 nm; TR = 13.88 min (minor), 15.98 min (major)).  $^1\text{H}$  NMR (400 MHz,  $\text{CDCl}_3$ )  $\delta$  7.74 (d,  $J = 8.4$  Hz, 2H), 7.33 (d,  $J = 8.0$  Hz, 2H), 6.99 – 6.91 (m, 2H), 6.87 (s, 1H), 6.79 (d,  $J = 6.8$  Hz, 1H), 6.45 (d,  $J = 8.8$  Hz, 2H), 6.40 (d,  $J = 8.8$  Hz, 2H), 3.27 (s, 1H), 2.91 (d,  $J = 16.0$  Hz, 1H), 2.83 (s, 6H), 2.77 (d,  $J = 15.6$  Hz, 1H), 2.46 (s, 3H), 1.96 (s, 3H), 1.72 – 1.62 (m, 4H), 1.61 (s, 3H), 1.55 – 1.46 (m, 2H), 1.20 – 1.11 (m, 2H);  $^{13}\text{C}$  NMR (100 MHz,  $\text{CDCl}_3$ )  $\delta$  149.0, 144.5, 137.2, 137.1, 137.0(4), 136.9(8), 136.4, 133.0, 130.1, 129.7, 128.5, 126.9, 126.5(3), 126.4(7), 125.0, 121.6, 112.1, 62.4, 53.8, 42.0, 40.8, 39.3, 35.0, 23.6, 23.2, 21.6, 20.5, 20.3; IR (neat): 2950, 2857, 1614, 1519, 1445, 1406, 1369, 1186, 1174, 1098; HRESIMS Calcd for  $[\text{C}_{34}\text{H}_{38}\text{N}_2\text{NaO}_2\text{S}]^+$  ( $\text{M} + \text{Na}^+$ ) 561.2546, found 561.2555.

**(*R*)-*N*-(1-cycloheptyl-4-(4-(dimethylamino)phenyl)but-3-yn-2-yl)-*N*-((2,6-dimethylphenyl)ethynyl)-4-methylbenzenesulfonamide ((+)-1ag)**

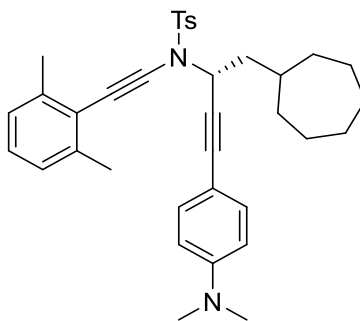

**(+)-1ag**

Compound (+)-**1ag** was prepared in 42% yield (47.5 mg) according to the general procedure. Pale yellow oil, (eluent: PE/DCM = 2/1).  $[\alpha]_D^{25} = +59.4^\circ$  (c = 1.0, CHCl<sub>3</sub>). 96% ee (determined by HPLC: Chiralpak IE Column, 10/90 *i*-PrOH/hexane, 1.0 mL/min, 254 nm; TR = 11.44 min (minor), 12.43 min (major)).

**(R)-4-(3'-(2,6-dimethylphenyl)-1'-tosyl-4',6'-dihydro-1'H-spiro[cycloheptane-1,5'-cyclopenta[*b*]pyrrol]-4'-yl)-*N,N*-dimethylaniline ((-)-2ag)**

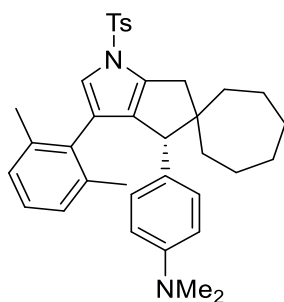

**(-)-2ag**

Compound (-)-**2ag** was prepared in 44% yield (49.8 mg) according to the general procedure. Pale yellow oil, (eluent: PE/DCM = 2/1).  $[\alpha]_D^{25} = -53.5^\circ$  (c = 1.0, CHCl<sub>3</sub>). 91% ee (determined by HPLC: Chiralpak IE Column, 2/98 *i*-PrOH/hexane, 1.0 mL/min, 254 nm; TR = 7.96 min (minor), 9.34 min (major)). <sup>1</sup>H NMR (500 MHz, CDCl<sub>3</sub>)  $\delta$  7.75 (d, *J* = 8.5 Hz, 2H), 7.32 (d, *J* = 8.0 Hz, 2H), 6.99 – 6.89 (m, 2H), 6.87 (s, 1H), 6.78 (d, *J* = 7.0 Hz, 1H), 6.51 – 6.34 (m, 4H), 3.25 (s, 1H), 2.83 (s, 6H), 2.81 – 2.77 (m, 1H), 2.72 (d, *J* = 16.0 Hz, 1H), 2.46 (s, 3H), 1.96 (s, 3H), 1.77 – 1.70 (m, 1H), 1.64 (s, 3H), 1.63 – 1.53 (m, 2H), 1.51 – 1.40 (m, 5H), 1.27 – 1.13 (m, 4H); <sup>13</sup>C NMR (125 MHz, CDCl<sub>3</sub>)  $\delta$  148.9, 144.5, 137.1(2), 137.0(5), 137.0, 136.9, 136.4, 133.0, 129.7, 129.3, 129.0, 126.9, 126.8, 126.6, 126.5, 125.3, 121.5, 112.0, 57.6, 56.2, 42.9, 40.7, 39.9, 36.9, 30.2, 29.9, 23.5, 23.4, 21.6, 20.6, 20.4; IR (neat): 2921, 2852, 1614, 1519, 1462, 1370, 1265, 1186, 1175, 1101; HRESIMS Calcd for [C<sub>36</sub>H<sub>42</sub>N<sub>2</sub>NaO<sub>2</sub>S]<sup>+</sup> (M + Na<sup>+</sup>) 589.2859, found 589.2848.

**(R)-*N*-(1-cyclooctyl-4-(4-(dimethylamino)phenyl)but-3-yn-2-yl)-*N*-((2,6-dimethylphenyl)ethynyl)-4-methylbenzenesulfonamide ((+)-1ah)**

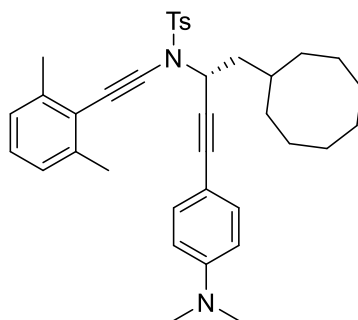

(+)-**1ah**

Compound (+)-**1ah** was prepared in 41% yield (47.6 mg) according to the general procedure. Pale yellow oil, (eluent: PE/DCM = 2/1).  $[\alpha]_{\text{D}}^{25} = +24.8^{\circ}$  ( $c = 1.0$ ,  $\text{CHCl}_3$ ). 94% ee (determined by HPLC: Chiralpak IE Column, 10/90 *i*-PrOH/hexane, 1.0 mL/min, 254 nm; TR = 11.28 min (minor), 12.41 min (major)).

**(R)-4-(3'-(2,6-dimethylphenyl)-1'-tosyl-4',6'-dihydro-1'H-spiro[cyclooctane-1,5'-cyclopenta[*b*]pyrrol]-4'-yl)-*N,N*-dimethylaniline ((-)-2ah)**

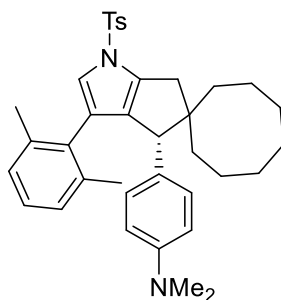

(-)-**2ah**

Compound (-)-**2ah** was prepared in 42% yield (48.8 mg) according to the general procedure. Pale yellow oil, (eluent: PE/DCM = 2/1).  $[\alpha]_{\text{D}}^{25} = -87.2^{\circ}$  ( $c = 1.0$ ,  $\text{CHCl}_3$ ). 90% ee (determined by HPLC: Chiralpak IE Column, 10/90 *i*-PrOH/hexane, 1.0 mL/min, 254 nm; TR = 7.84 min (minor), 9.21 min (major)).  $^1\text{H}$  NMR (400 MHz,  $\text{CDCl}_3$ )  $\delta$  7.74 (d,  $J = 8.4$  Hz, 2H), 7.32 (d,  $J = 8.0$  Hz, 2H), 6.97 – 6.90 (m, 2H), 6.86 (s, 1H), 6.76 (d,  $J = 6.4$  Hz, 1H), 6.46 – 6.36 (m, 4H), 3.28 (s, 1H), 2.83 (s, 6H), 2.79 (d,  $J = 16.0$  Hz, 1H), 2.71 (d,  $J = 16.0$  Hz, 1H), 2.46 (s, 3H), 1.96 (s, 3H), 1.79 – 1.62 (m, 3H), 1.61 (s, 3H), 1.60 – 1.39 (m, 9H), 1.36 – 1.26 (m, 2H);  $^{13}\text{C}$  NMR (100 MHz,  $\text{CDCl}_3$ )  $\delta$  148.9, 144.5, 137.2, 137.1, 136.9, 136.7, 136.5, 133.0, 129.7, 129.4, 129.2, 126.9, 126.8, 126.5, 126.4, 125.4, 121.5, 112.0, 57.5, 54.3, 40.7, 39.3, 36.5, 32.3, 28.6,

28.5, 25.1, 23.6, 23.4, 21.6, 20.5, 20.3; IR (neat): 2919, 2851, 1614, 1519, 1464, 1445, 1370, 1266, 1186, 1174; HRESIMS Calcd for  $[C_{37}H_{44}N_2NaO_2S]^+$  ( $M + Na^+$ ) 603.3016, found 603.3021.

**(*R*)-*N*-(1-cyclododecyl-4-(4-(dimethylamino)phenyl)but-3-yn-2-yl)-*N*-((2,6-dimethylphenyl)ethynyl)-4-methylbenzenesulfonamide ((+)-**1ai**)**

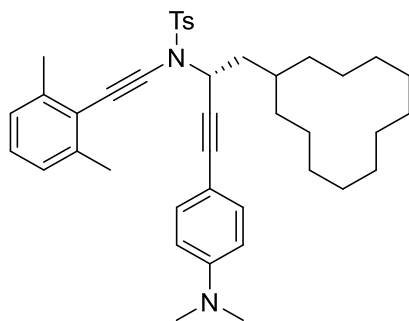

**(+)-**1ai****

Compound (+)-**1ai** was prepared in 48% yield (61.0 mg) according to the general procedure. Pale yellow oil, (eluent: PE/DCM = 2/1).  $[\alpha]_D^{25} = +30.4^\circ$  ( $c = 1.0$ ,  $CHCl_3$ ). 92% ee (determined by HPLC: Chiralpak IE Column, 10/90 *i*-PrOH/hexane, 1.0 mL/min, 254 nm; TR = 9.39 min (minor), 10.11 min (major)).

**(*R*)-4-(3'-(2,6-dimethylphenyl)-1'-tosyl-4',6'-dihydro-1'*H*-spiro[cyclododecane-1,5'-cyclopenta[*b*]pyrrol]-4'-yl)-*N,N*-dimethylaniline ((-)-**2ai**)**

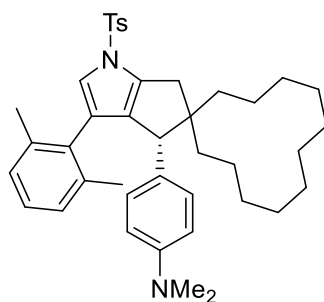

**(-)-**2ai****

Compound (-)-**2ai** was prepared in 46% yield (58.5 mg) according to the general procedure. Pale yellow oil, (eluent: PE/DCM = 2/1).  $[\alpha]_D^{25} = -66.5^\circ$  ( $c = 1.0$ ,  $CHCl_3$ ). 96% ee (determined by HPLC: Chiralpak IE Column, 10/90 *i*-PrOH/hexane, 1.0 mL/min, 254 nm; TR = 7.94 min (minor), 9.18 min (major)).  $^1H$  NMR (400 MHz,

CDCl<sub>3</sub>)  $\delta$  7.74 (d,  $J$  = 8.0 Hz, 2H), 7.32 (d,  $J$  = 8.0 Hz, 2H), 7.01 – 6.90 (m, 2H), 6.86 (s, 1H), 6.77 (d,  $J$  = 6.8 Hz, 1H), 6.40 (s, 4H), 3.35 (s, 1H), 2.83 (s, 6H), 2.78 (d,  $J$  = 16.0 Hz, 1H), 2.60 (d,  $J$  = 16.0 Hz, 1H), 2.46 (s, 3H), 1.99 (s, 3H), 1.57 (s, 3H), 1.46 – 0.97 (m, 22H); <sup>13</sup>C NMR (100 MHz, CDCl<sub>3</sub>)  $\delta$  148.9, 144.5, 137.3, 137.2, 137.1, 136.9, 136.4, 133.0, 129.7, 129.5, 129.1, 126.8(4), 126.8(1), 126.6, 126.5, 125.3, 121.5, 112.2, 56.8, 51.9, 40.8, 38.7, 34.7, 31.4, 26.9(1), 26.8(6), 26.1, 22.8(0), 22.7(8), 22.5, 22.4, 21.6, 20.5, 20.2, 20.1, 19.9; IR (neat): 2934, 2859, 1614, 1519, 1470, 1444, 1370, 1265, 1122, 1101; HRESIMS Calcd for [C<sub>41</sub>H<sub>52</sub>N<sub>2</sub>NaO<sub>2</sub>S]]<sup>+</sup> (M + Na<sup>+</sup>) 659.3642, found 659.3644.

**(*R*)-*N*-(1-cyclopentadecyl-4-(4-(dimethylamino)phenyl)but-3-yn-2-yl)-*N*-((2,6-dimethylphenyl)ethynyl)-4-methylbenzenesulfonamide ((+)-**1aj**)**

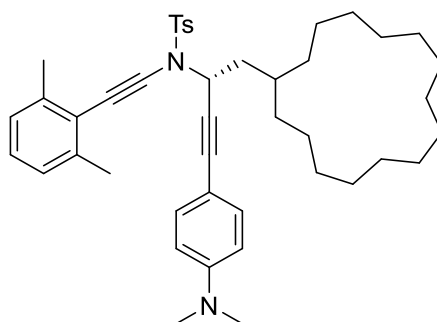

**(+)-**1aj****

Compound (+)-**1aj** was prepared in 44% yield (59.8 mg) according to the general procedure. Pale yellow oil, (eluent: PE/DCM = 2/1).  $[\alpha]_D^{25} = +52.4^\circ$  ( $c = 1.0$ , CHCl<sub>3</sub>). 94% ee (determined by HPLC: Chiralpak IE Column, 2/98 *i*-PrOH/hexane, 1.0 mL/min, 254 nm; TR = 18.59 min (minor), 20.16 min (major)).

**(*R*)-4-(3'-(2,6-dimethylphenyl)-1'-tosyl-4',6'-dihydro-1'*H*-spiro[cyclopentadecane-1,5'-cyclopenta[*b*]pyrrol]-4'-yl)-*N,N*-dimethylaniline ((-)-**2aj**)**

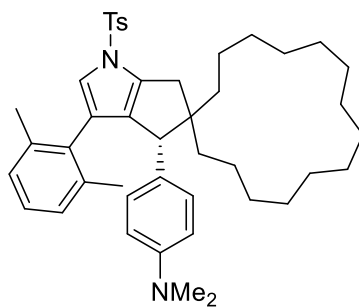

**(-)-2aj**

Compound **(-)-2aj** was prepared in 44% yield (59.8 mg) according to the general procedure. Pale yellow oil, (eluent: PE/DCM = 2/1).  $[\alpha]_{\text{D}}^{25} = -79.2^\circ$  ( $c = 1.0$ ,  $\text{CHCl}_3$ ). 93% ee (determined by HPLC: Chiralpak IE Column, 5/95 *i*-PrOH/hexane, 1.0 mL/min, 254 nm; TR = 8.47 min (minor), 9.82 min (major)).  $^1\text{H NMR}$  (400 MHz,  $\text{CDCl}_3$ )  $\delta$  7.74 (d,  $J = 8.4$  Hz, 2H), 7.32 (d,  $J = 8.0$  Hz, 2H), 7.02 – 6.90 (m, 2H), 6.86 (s, 1H), 6.77 (d,  $J = 6.4$  Hz, 1H), 6.53 – 6.30 (m, 4H), 3.29 (s, 1H), 2.83 (s, 6H), 2.78 – 2.64 (m, 2H), 2.46 (s, 3H), 1.97 (s, 3H), 1.58 (s, 3H), 1.38 – 1.02 (m, 28H);  $^{13}\text{C NMR}$  (100 MHz,  $\text{CDCl}_3$ )  $\delta$  149.0, 144.5, 137.3, 137.2, 137.1, 136.9, 136.5, 133.0, 129.7, 129.3, 129.1, 126.9, 126.8, 126.6, 126.5, 125.4, 121.5, 112.2, 56.5, 53.0, 40.8, 39.2, 38.8, 34.8, 28.0, 27.9, 26.9(3), 26.8(5), 26.7(7), 26.6, 25.9, 22.6, 22.5, 21.6, 20.5, 20.3; IR (neat): 2931, 2860, 1614, 1515, 1471, 1445, 1370, 1266, 1122, 1103, 815; HRESIMS Calcd for  $[\text{C}_{44}\text{H}_{58}\text{N}_2\text{NaO}_2\text{S}]^+$  ( $\text{M} + \text{Na}^+$ ) 701.4111, found 701.4119.

**(R)-N-(4-(4-(dimethylamino)phenyl)-1-(1,4-dioxaspiro[4.5]decan-8-yl)but-3-yn-2-yl)-N-((2,6-dimethylphenyl)ethynyl)-4-methylbenzenesulfonamide ((+)-1ak)**

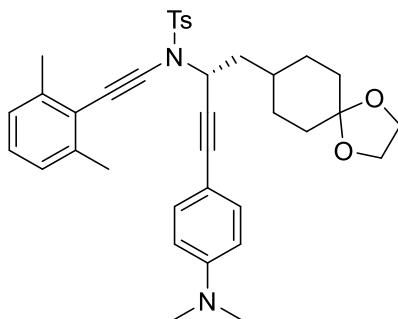

**(+)-1ak**

Compound **(+)-1ak** was prepared in 44% yield (53.7 mg) according to the general procedure. Pale yellow oil, (eluent: PE/DCM = 2/1).  $[\alpha]_{\text{D}}^{25} = +66.4^\circ$  ( $c = 1.0$ ,  $\text{CHCl}_3$ ).



94% ee (determined by HPLC: Chiralpak IE Column, 30/70 *i*-PrOH/hexane, 1.0 mL/min, 254 nm; TR = 15.71 min (minor), 18.91 min (major)).

**(*R*)-4-(3-(2,6-dimethylphenyl)-1-tosyl-4,6-dihydro-1*H*-dispiro[cyclopenta[*b*]pyrrole-5,1'-cyclohexane-4',2''-[1,3]dioxolan]-4-yl)-*N,N*-dimethylaniline ((-)-2ak)**

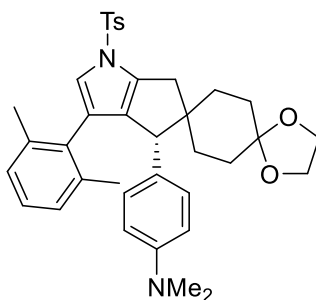

**(-)-2ak**

Compound (-)-**2ak** was prepared in 44% yield (53.7 mg) according to the general procedure. Pale yellow solid (mp 121–122 °C), (eluent: PE/DCM = 2/1).  $[\alpha]_D^{25} = -53.8^\circ$  ( $c = 1.0$ ,  $\text{CHCl}_3$ ). 94% ee (determined by HPLC: Chiralpak IE Column, 30/70 *i*-PrOH/hexane, 1.0 mL/min, 254 nm; TR = 8.41 min (minor), 9.11 min (major)).  $^1\text{H}$  NMR (500 MHz,  $\text{CDCl}_3$ )  $\delta$  7.75 (d,  $J = 8.5$  Hz, 2H), 7.32 (d,  $J = 8.0$  Hz, 2H), 6.99 – 6.90 (m, 2H), 6.89 (s, 1H), 6.78 (d,  $J = 7.0$  Hz, 1H), 6.47 (d,  $J = 8.0$  Hz, 2H), 6.39 (d,  $J = 9.0$  Hz, 2H), 3.96 – 3.84 (m, 4H), 3.26 (s, 1H), 2.92 (d,  $J = 16.0$  Hz, 1H), 2.83 (s, 6H), 2.76 (d,  $J = 16.0$  Hz, 1H), 2.46 (s, 3H), 1.95 (s, 3H), 1.78 – 1.65 (m, 4H), 1.63 (s, 3H), 1.62 – 1.56 (m, 1H), 1.53 – 1.40 (m, 2H), 1.27 – 1.19 (m, 2H), 1.16 – 1.09 (m, 1H);  $^{13}\text{C}$  NMR (125 MHz,  $\text{CDCl}_3$ )  $\delta$  149.1, 144.6, 137.1, 136.9, 136.7, 136.4, 132.8, 129.7, 128.9, 128.6, 126.9(0), 126.8(8), 126.6, 126.5, 125.1, 121.8, 112.0, 108.7, 64.2, 64.1, 54.4, 52.9, 40.7, 36.3, 36.0, 32.2, 32.0, 31.9, 21.6, 20.5, 20.3; IR (neat): 2923, 1612, 1519, 1444, 1369, 1269, 1174, 1098, 814; HRESIMS Calcd for  $[\text{C}_{37}\text{H}_{42}\text{N}_2\text{NaO}_4\text{S}]^+$  ( $\text{M} + \text{Na}^+$ ) 633.2757, found 633.2766.

**(*R*)-*N*-(4-(4-(dimethylamino)phenyl)-1-(4,4-dimethylcyclohexyl)but-3-yn-2-yl)-*N*-((2,6-dimethylphenyl)ethynyl)-4-methylbenzenesulfonamide ((+)-1al)**

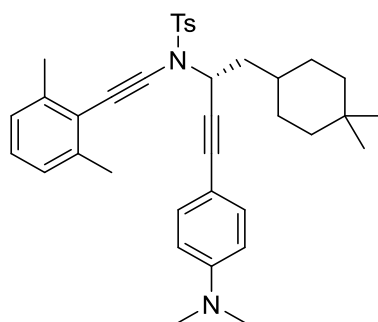

**(+)-1al**

Compound (+)-**1al** was prepared in 45% yield (52.5 mg) according to the general procedure. Pale yellow oil, (eluent: PE/DCM = 2/1).  $[\alpha]_{\text{D}}^{25} = +40.9^{\circ}$  ( $c = 1.0$ ,  $\text{CHCl}_3$ ). 96% ee (determined by HPLC: Chiralpak IE Column, 5/95 *i*-PrOH/hexane, 1.0 mL/min, 254 nm; TR = 14.95 min (minor), 16.39 min (major)).

**(R)-4-(3'-(2,6-dimethylphenyl)-4,4-dimethyl-1'-tosyl-4',6'-dihydro-1'H-spiro[cyclohexane-1,5'-cyclopenta[*b*]pyrrol]-4'-yl)-*N,N*-dimethylaniline ((-)-2al)**

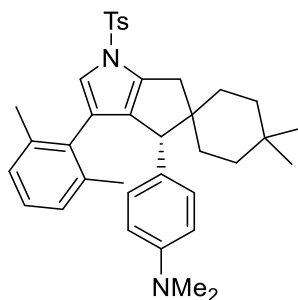

**(-)-2al**

Compound (-)-**2al** was prepared in 45% yield (52.2 mg) according to the general procedure. Pale yellow oil, (eluent: PE/DCM = 2/1).  $[\alpha]_{\text{D}}^{25} = -84.2^{\circ}$  ( $c = 1.0$ ,  $\text{CHCl}_3$ ). 96% ee (determined by HPLC: Chiralpak IE Column, 5/95 *i*-PrOH/hexane, 1.0 mL/min, 254 nm; TR = 8.63 min (minor), 9.63 min (major)).  $^1\text{H NMR}$  (500 MHz,  $\text{CDCl}_3$ )  $\delta$  7.75 (d,  $J = 8.5$  Hz, 2H), 7.32 (d,  $J = 8.0$  Hz, 2H), 6.98 – 6.88 (m, 2H), 6.86 (s, 1H), 6.78 (d,  $J = 7.5$  Hz, 1H), 6.45 (d,  $J = 8.0$  Hz, 2H), 6.39 (d,  $J = 8.5$  Hz, 2H), 3.23 (s, 1H), 2.92 (d,  $J = 16.0$  Hz, 1H), 2.82 (s, 6H), 2.68 (d,  $J = 16.0$  Hz, 1H), 2.46 (s, 3H), 1.95 (s, 3H), 1.63 (s, 3H), 1.57 – 1.52 (m, 2H), 1.43 – 1.37 (m, 1H), 1.31 – 1.23 (m, 2H), 1.14 – 0.99 (m, 3H), 0.89 (s, 3H), 0.81 (s, 3H);  $^{13}\text{C NMR}$  (125 MHz,  $\text{CDCl}_3$ )  $\delta$  149.0, 144.5, 137.1, 137.0, 136.9, 136.4, 132.9, 129.7, 129.0, 126.8(5), 126.8(2), 126.5(3), 126.4(7), 125.3,

121.6, 112.0, 53.7, 40.7, 36.2, 36.1, 34.9, 31.0, 29.6, 21.6, 20.5, 20.3; IR (neat): 2920, 2851, 1614, 1519, 1463, 1370, 1187, 1175, 1128, 1101; HRESIMS Calcd for  $[C_{37}H_{45}N_2O_2S]^+$  ( $M + H^+$ ) 581.3196, found 581.3201.

**(R)-N-(1-((1R,3S,5r,7r)-adamantan-2-yl)-4-(4-(dimethylamino)phenyl)but-3-yn-2-yl)-N-((2,6-dimethylphenyl)ethynyl)-4-methylbenzenesulfonamide ((+)-1am)**

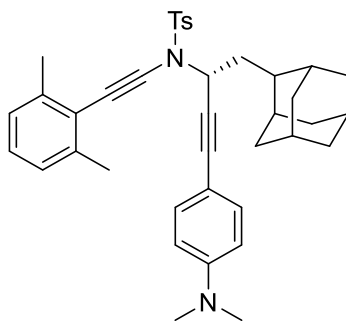

**(+)-1am**

Compound (+)-**1am** was prepared in 45% yield (54.4 mg) according to the general procedure. Pale yellow oil, (eluent: PE/DCM = 2/1).  $[\alpha]_D^{25} = +72.3^\circ$  ( $c = 1.0$ ,  $CHCl_3$ ). 99.9% ee (determined by HPLC: Chiralpak IE Column, 3/97 *i*-PrOH/hexane, 1.0 mL/min, 254 nm; TR = 20.93 min (minor), 21.67 min (major)).

**4-((1R,2S,4'S,5S)-3'-(2,6-dimethylphenyl)-1'-tosyl-4',6'-dihydro-1'H-spiro[adamantane-2,5'-cyclopenta[*b*]pyrrol]-4'-yl)-N,N-dimethylaniline ((-)-2am)**

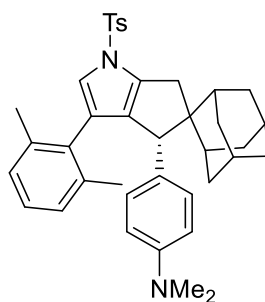

**(-)-2am**

Compound (-)-**2am** was prepared in 45% yield (54.4 mg) according to the general procedure. Pale yellow oil, (eluent: PE/DCM = 2/1).  $[\alpha]_D^{25} = -144.3^\circ$  ( $c = 1.0$ ,  $CHCl_3$ ). 98% ee (determined by HPLC: Chiralpak IE Column, 10/90 *i*-PrOH/hexane, 1.0 mL/min, 254 nm; TR = 8.24 min (minor), 10.37 min (major)).  $^1H$  NMR (500 MHz,

CDCl<sub>3</sub>) δ 7.73 (d, *J* = 8.0 Hz, 2H), 7.30 (d, *J* = 8.0 Hz, 2H), 7.02 – 6.93 (m, 2H), 6.78 (s, 1H), 6.75 (d, *J* = 7.0 Hz, 1H), 6.51 (d, *J* = 8.5 Hz, 2H), 6.37 (d, *J* = 8.5 Hz, 2H), 3.67 (s, 1H), 3.39 (d, *J* = 16.5 Hz, 1H), 2.87 – 2.79 (m, 7H), 2.45 (s, 3H), 2.20 – 2.08 (m, 2H), 1.93 (s, 3H), 1.86 – 1.81 (m, 2H), 1.74 – 1.66 (m, 3H), 1.63 – 1.48 (m, 6H), 1.28 (s, 3H), 1.16 – 1.08 (m, 1H); <sup>13</sup>C NMR (125 MHz, CDCl<sub>3</sub>) δ 148.8, 144.4, 138.6, 137.6, 136.8, 136.4, 136.1, 132.9, 129.6, 129.5, 126.8, 126.6, 126.5, 126.3, 125.1, 121.1, 112.0, 59.9, 51.0, 40.8, 38.7, 37.4, 35.0, 34.8, 34.7, 34.5, 33.9, 33.0, 27.3(2), 27.2(7), 21.6, 20.5, 19.6; IR (neat): 2911, 2856, 1614, 1519, 1457, 1369, 1266, 1187, 1174, 1093; HRESIMS Calcd for [C<sub>39</sub>H<sub>44</sub>N<sub>2</sub>NaO<sub>2</sub>S]<sup>+</sup> (*M* + Na<sup>+</sup>) 627.3016, found 627.3020.

**(*R*)-*N*-(1-(4-(dimethylamino)phenyl)-5-methylhex-1-yn-3-yl)-*N*-((2,6-dimethylphenyl)ethynyl)-4-methylbenzenesulfonamide ((+)-**1an**)**

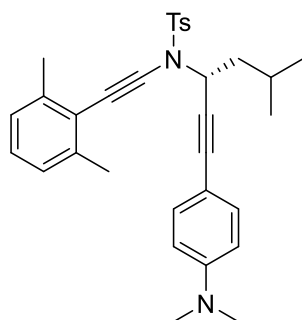

**(+)-**1an****

Compound (+)-**1an** was prepared in 38% yield (38.9 mg) according to the general procedure. Pale yellow oil, (eluent: PE/DCM = 2/1). [ $\alpha$ ]<sub>D</sub><sup>25</sup> = +40.4° (*c* = 1.0, CHCl<sub>3</sub>). 90% ee (determined by HPLC: Chiralpak ODH Column, 1/99 *i*-PrOH/hexane, 1.0 mL/min, 254 nm; TR = 12.54 min (major), 15.36 min (minor)).

**(*R*)-4-(3-(2,6-dimethylphenyl)-5,5-dimethyl-1-tosyl-1,4,5,6-tetrahydrocyclopenta[*b*]pyrrol-4-yl)-*N,N*-dimethylaniline ((-)-**2an**)**

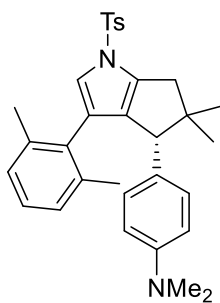

**(-)-2an**

Compound **(-)-2an** was prepared in 37% yield (37.9 mg) according to the general procedure. Pale yellow oil, (eluent: PE/DCM = 2/1).  $[\alpha]_D^{25} = -13.2^\circ$  ( $c = 1.0$ ,  $\text{CHCl}_3$ ). 90% ee (determined by HPLC: Chiralpak IC Column, 10/90 *i*-PrOH/hexane, 1.0 mL/min, 254 nm; TR = 6.39 min (minor), 7.50 min (major)).  $^1\text{H}$  NMR (500 MHz,  $\text{CDCl}_3$ )  $\delta$  7.75 (d,  $J = 8.5$  Hz, 2H), 7.32 (d,  $J = 8.0$  Hz, 2H), 6.98 – 6.87 (m, 3H), 6.80 (d,  $J = 7.5$  Hz, 1H), 6.46 (d,  $J = 8.5$  Hz, 2H), 6.40 (d,  $J = 9.0$  Hz, 2H), 3.24 (s, 1H), 2.82 (s, 6H), 2.80 (d,  $J = 16.0$  Hz, 1H), 2.68 (d,  $J = 16.0$  Hz, 1H), 2.46 (s, 3H), 1.96 (s, 3H), 1.74 (s, 3H), 1.20 (s, 3H), 0.66 (s, 3H);  $^{13}\text{C}$  NMR (125 MHz,  $\text{CDCl}_3$ )  $\delta$  144.5, 137.0(4), 137.0(2), 136.85, 136.5, 136.0, 133.0, 129.7, 128.7, 126.9, 126.8, 126.6, 126.5, 125.2, 121.7, 112.1, 55.7, 50.1, 41.2, 40.8, 31.2, 25.9, 21.6, 20.5; IR (neat): 2961, 2919, 1613, 1519, 1458, 1369, 1265, 1186, 1174, 1097; HRESIMS Calcd for  $[\text{C}_{32}\text{H}_{36}\text{N}_2\text{NaO}_2\text{S}]^+$  ( $\text{M} + \text{Na}^+$ ) 535.2390, found 535.2388.

**(R)-N-(1-(4-(dimethylamino)phenyl)-5-ethylhept-1-yn-3-yl)-N-((2,6-dimethylphenyl)ethynyl)-4-methylbenzenesulfonamide ((+)-1ao)**

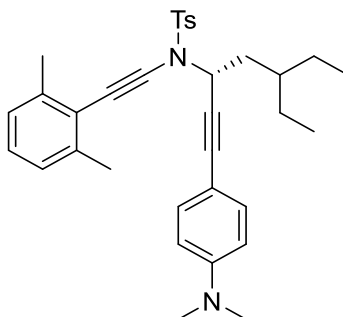

**(+)-1ao**

Compound **(+)-1ao** was prepared in 39% yield (42.1 mg) according to the general procedure. Pale yellow oil, (eluent: PE/DCM = 2/1).  $[\alpha]_D^{25} = +33.5^\circ$  ( $c = 1.0$ ,  $\text{CHCl}_3$ ).

91% ee (determined by HPLC: Chiralpak ODH Column, 1/99 *i*-PrOH/hexane, 1.0 mL/min, 254 nm; TR = 9.95 min (major), 12.65 min (minor)).

**(*R*)-4-(3-(2,6-dimethylphenyl)-5,5-diethyl-1-tosyl-1,4,5,6-tetrahydrocyclopenta[*b*]pyrrol-4-yl)-*N,N*-dimethylaniline ((-)-2ao)**

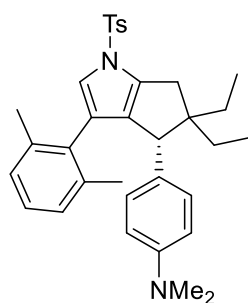

**(-)-2ao**

Compound (-)-2ao was prepared in 40% yield (43.2 mg) according to the general procedure. Pale yellow oil, (eluent: PE/DCM = 2/1).  $[\alpha]_D^{25} = -11.3^\circ$  ( $c = 1.0$ ,  $\text{CHCl}_3$ ). 93% ee (determined by HPLC: Chiralpak IC Column, 2/98 *i*-PrOH/hexane, 1.0 mL/min, 254 nm; TR = 13.56 min (minor), 17.01 min (major)).  $^1\text{H}$  NMR (400 MHz,  $\text{CDCl}_3$ )  $\delta$  7.74 (d,  $J = 7.2$  Hz, 2H), 7.32 (d,  $J = 7.6$  Hz, 2H), 6.98 – 6.89 (m, 2H), 6.86 (s, 1H), 6.76 (d,  $J = 6.8$  Hz, 1H), 6.45 (d,  $J = 7.6$  Hz, 2H), 6.39 (d,  $J = 8.0$  Hz, 2H), 3.35 (s, 1H), 2.83 (s, 6H), 2.72 (q,  $J = 16.0$  Hz, 2H), 2.45 (s, 3H), 1.97 (s, 3H), 1.61 (s, 3H), 1.55 – 1.46 (m, 2H), 1.11 – 0.89 (m, 2H), 0.82 (t,  $J = 7.2$  Hz, 3H), 0.64 (t,  $J = 7.2$  Hz, 3H);  $^{13}\text{C}$  NMR (100 MHz,  $\text{CDCl}_3$ )  $\delta$  148.9, 144.5, 137.2, 137.0, 136.9, 136.7, 136.4, 133.0, 129.7, 129.3, 129.2, 126.9, 126.8, 126.6, 126.5, 125.1, 121.6, 112.0, 56.6, 52.1, 40.7, 38.4, 30.6, 27.7, 21.6, 20.6, 20.3, 8.9, 8.7; IR (neat): 2961, 2920, 1610, 1519, 1460, 1366, 1188, 1175, 1005; HRESIMS Calcd for  $[\text{C}_{34}\text{H}_{40}\text{N}_2\text{NaO}_2\text{S}]^+$  ( $\text{M} + \text{Na}^+$ ) 563.2703, found 563.2708.

**(*R*)-*N*-(1-(4-(dimethylamino)phenyl)-5-propyloct-1-yn-3-yl)-*N*-((2,6-dimethylphenyl)ethynyl)-4-methylbenzenesulfonamide ((+)-1ap)**

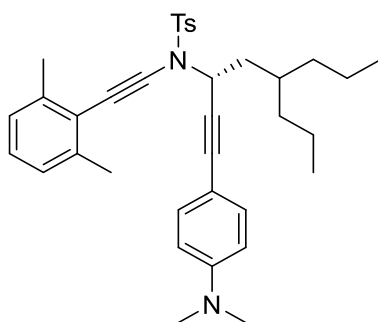

(+)-**1ap**

Compound (+)-**1ap** was prepared in 43% yield (48.9 mg) according to the general procedure. Pale yellow oil, (eluent: PE/DCM = 2/1).  $[\alpha]_D^{25} = +54.9^\circ$  ( $c = 1.0$ ,  $\text{CHCl}_3$ ). 91% ee (determined by HPLC: Chiralpak ADH Column, 10/90 *i*-PrOH/hexane, 1.0 mL/min, 254 nm; TR = 8.21 min (minor), 9.37 min (major)).

**(R)-4-(3-(2,6-dimethylphenyl)-5,5-dipropyl-1-tosyl-1,4,5,6-tetrahydrocyclopenta[*b*]pyrrol-4-yl)-*N,N*-dimethylaniline ((-)-2ap)**

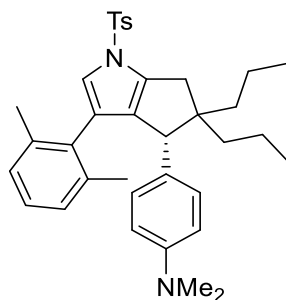

(-)-**2ap**

Compound (-)-**2ap** was prepared in 41% yield (46.6 mg) according to the general procedure. Pale yellow oil, (eluent: PE/DCM = 2/1).  $[\alpha]_D^{25} = -9.6^\circ$  ( $c = 1.0$ ,  $\text{CHCl}_3$ ). 91% ee (determined by HPLC: Chiralpak IE Column, 2/98 *i*-PrOH/hexane, 1.0 mL/min, 254 nm; TR = 8.13 min (minor), 9.73 min (major)).  $^1\text{H NMR}$  (500 MHz,  $\text{CDCl}_3$ )  $\delta$  7.74 (d,  $J = 8.5$  Hz, 2H), 7.32 (d,  $J = 8.0$  Hz, 2H), 6.98 – 6.90 (m, 2H), 6.87 (s, 1H), 6.77 (d,  $J = 7.0$  Hz, 1H), 6.44 (d,  $J = 9.0$  Hz, 2H), 6.40 (d,  $J = 9.0$  Hz, 2H), 3.31 (d,  $J = 1.0$  Hz, 1H), 2.83 (s, 6H), 2.75 (d,  $J = 16.5$  Hz, 1H), 2.67 (d,  $J = 16.5$  Hz, 1H), 2.46 (s, 3H), 1.98 (s, 3H), 1.59 (s, 3H), 1.42 – 1.36 (m, 2H), 1.22 – 1.01 (m, 4H), 0.98 – 0.87 (m, 2H), 0.81 (t,  $J = 7.0$  Hz, 3H), 0.62 (t,  $J = 7.5$  Hz, 3H);  $^{13}\text{C NMR}$  (125 MHz,  $\text{CDCl}_3$ )  $\delta$  149.0, 144.5, 137.2, 137.1, 136.9, 136.4, 133.0, 129.7, 129.3, 129.1, 126.9, 126.8, 126.6,

126.5, 125.1, 121.6, 112.2, 56.4, 52.9, 41.8, 40.8, 38.9, 38.1, 21.6, 20.5, 20.3, 17.8, 17.7, 14.9, 14.8; IR (neat): 2925, 2853, 1610, 1522, 1369, 1277, 1185, 1105, 1097, 815; HRESIMS Calcd for  $[C_{36}H_{44}N_2NaO_2S]^+$  ( $M + Na^+$ ) 591.3016, found 591.3028.

**(*R*)-*N*-(1-(4-(dimethylamino)phenyl)-5,5-diphenylpent-1-yn-3-yl)-*N*-((2,6-dimethylphenyl)ethynyl)-4-methylbenzenesulfonamide ((+)-**1aq**)**

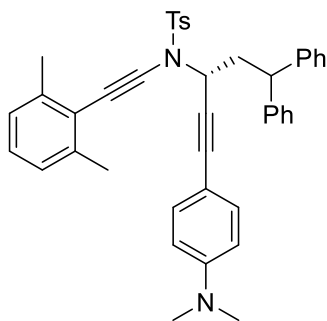

**(+)-**1aq****

Compound (+)-**1aq** was prepared in 40% yield (50.9 mg) according to the general procedure at -20 °C. Pale yellow oil, (eluent: PE/DCM = 2/1).  $[\alpha]_D^{25} = +21.3^\circ$  ( $c = 1.0$ ,  $CHCl_3$ ). 66% ee (determined by HPLC: Chiralpak ADH Column, 20/80 *i*-PrOH/hexane, 1.0 mL/min, 254 nm; TR = 4.95 min (major), 11.43 min (minor)).

**(*S*)-4-(3-(2,6-dimethylphenyl)-5,5-diphenyl-1-tosyl-1,4,5,6-tetrahydrocyclopenta[*b*]pyrrol-4-yl)-*N,N*-dimethylaniline ((-)-**2aq**)**

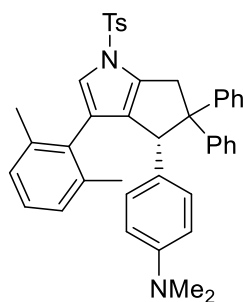

**(-)-**2aq****

Compound (-)-**2aq** was prepared in 38% yield (48.2 mg) according to the general procedure at -20 °C. Pale yellow solid (mp 174–175 °C), (eluent: PE/DCM = 2/1).  $[\alpha]_D^{25} = -45.7^\circ$  ( $c = 1.0$ ,  $CHCl_3$ ). 71% ee (determined by HPLC: Chiralpak IE Column, 20/80 *i*-PrOH/hexane, 1.0 mL/min, 254 nm; TR = 7.37 min (major), 14.40 min (minor)).



$^1\text{H}$  NMR (500 MHz,  $\text{CDCl}_3$ )  $\delta$  7.46 (d,  $J = 8.5$  Hz, 2H), 7.19 – 7.15 (m, 2H), 7.13 – 7.06 (m, 5H), 7.01 – 6.92 (m, 5H), 6.91 – 6.87 (m, 2H), 6.85 (s, 1H), 6.77 (d,  $J = 7.0$  Hz, 1H), 6.34 (d,  $J = 9.0$  Hz, 2H), 6.20 (d,  $J = 9.0$  Hz, 2H), 4.44 (s, 1H), 4.24 (d,  $J = 16.0$  Hz, 1H), 3.45 (d,  $J = 16.0$  Hz, 1H), 2.72 (s, 6H), 2.39 (s, 3H), 1.97 (s, 3H), 1.38 (s, 3H);  $^{13}\text{C}$  NMR (125 MHz,  $\text{CDCl}_3$ )  $\delta$  150.9, 149.0, 145.0, 144.3, 138.1, 137.7, 136.9, 136.2, 135.2, 132.6, 129.7, 129.4, 128.9, 127.6, 127.5, 127.3, 127.1, 126.8, 126.5, 126.3, 125.5, 125.4, 124.7, 122.1, 112.2, 66.6, 54.0, 40.8, 40.5, 21.6, 20.6, 20.0; IR (neat): 2925, 2851, 1610, 1593, 1527, 1371, 1175, 1115, 818; HRESIMS Calcd for  $[\text{C}_{42}\text{H}_{40}\text{N}_2\text{NaO}_2\text{S}]^+$  ( $\text{M} + \text{Na}^+$ ) 659.2703, found 659.2713.

**(*R*)-*N*-(1-(4-(dimethylamino)phenyl)-5,7-dimethyloct-1-yn-3-yl)-*N*-((2,6-dimethylphenyl)ethynyl)-4-methylbenzenesulfonamide ((+)-**1ar**)**

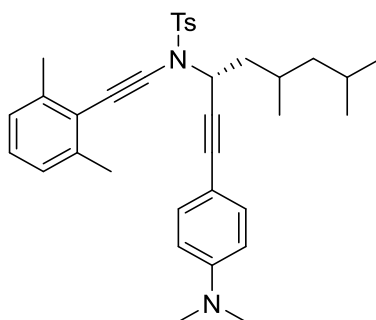

**(+)-**1ar****

Compound (+)-**1ar** was prepared in 41% yield (45.5 mg, 1:1 dr) according to the general procedure. Pale yellow oil, (eluent: PE/DCM = 2/1).  $[\alpha]_{\text{D}}^{25} = +106.3^\circ$  ( $c = 1.0$ ,  $\text{CHCl}_3$ ). 99% ee (determined by HPLC: Chiralpak IE Column, 10/90 *i*-PrOH/hexane, 1.0 mL/min, 254 nm; TR = 15.27 min (major), 16.85 min (minor)). 99% ee (determined by HPLC: Chiralpak IE Column, 10/90 *i*-PrOH/hexane, 1.0 mL/min, 254 nm; TR = 18.00 min (minor), 19.46 min (major)).

**4-((4*R*)-3-(2,6-dimethylphenyl)-5-isobutyl-5-methyl-1-tosyl-1,4,5,6-tetrahydrocyclopenta[*b*]pyrrol-4-yl)-*N,N*-dimethylaniline ((-)-**2ar**)**

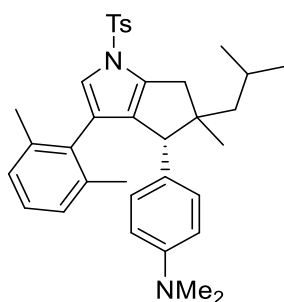

**(-)-2ar**

Compound (-)-**2ar** was prepared in 45% yield (50.0 mg) according to the general procedure. Pale yellow oil, (eluent: PE/DCM = 2/1). dr = 1:1.2 (determined by  $^1\text{H}$  NMR analysis of the reaction mixture).  $[\alpha]_{\text{D}}^{25} = -74.9^\circ$  ( $c = 1.0$ ,  $\text{CHCl}_3$ ). 90%, 92% ee (determined by HPLC: Chiralpak IE Column, 5/95 *i*-PrOH/hexane, 1.0 mL/min, 254 nm;  $\text{TR}_1 = 7.97$  min (minor), 9.06 min (major);  $\text{TR}_2 = 8.39$  min (minor), 9.07 min (major)).  $^1\text{H}$  NMR (600 MHz,  $\text{CDCl}_3$ )  $\delta$  7.79 – 7.70 (m, 2H), 7.34 – 7.29 (m, 2H), 6.98 – 6.84 (m, 3H), 6.83 – 6.74 (m, 1H), 6.51 (d,  $J = 8.4$  Hz, 1H), 6.45 – 6.34 (m, 3H), 3.37 (s, 0.5H), 3.17 (s, 0.5H), 2.82 (s, 6H), 2.81 – 2.78 (m, 0.5H), 2.73 (s, 1H), 2.62 (d,  $J = 15.6$  Hz, 0.5H), 2.45 (d,  $J = 7.8$  Hz, 3H), 1.96 (d,  $J = 4.2$  Hz, 3H), 1.77 (s, 1.5H), 1.57 (s, 1.5H), 1.46 – 1.40 (m, 1H), 1.14 (s, 1.5H), 1.04 – 0.96 (m, 2H), 0.84 – 0.79 (m, 3H), 0.69 (d,  $J = 6.6$  Hz, 1.5H), 0.62 (d,  $J = 6.6$  Hz, 1.5H), 0.60 (s, 1.5H);  $^{13}\text{C}$  NMR (150 MHz,  $\text{CDCl}_3$ )  $\delta$  149.1, 149.0, 144.6, 144.5, 137.2, 136.9(9), 136.9(5), 136.9(3), 136.9(1), 136.8(5), 136.4, 135.7, 132.9(8), 132.9(6), 129.7(4), 129.7(0), 128.9, 126.9, 126.8(3), 126.8(0), 126.6, 126.5(3), 126.5(0), 126.4, 125.3, 124.9, 121.7, 121.5, 112.3, 112.0, 55.6, 53.7, 53.2, 53.1, 41.2, 40.9, 40.7, 39.9, 39.5, 36.2, 34.0, 33.9, 28.7, 28.5, 28.1, 24.1, 22.7(1), 22.6(7), 22.5, 22.3, 21.6, 21.6, 20.6(0), 20.5(7), 20.2; IR (neat): 2926, 2850, 1611, 1556, 1527, 1377, 1175, 1111, 815; HRESIMS Calcd for  $[\text{C}_{35}\text{H}_{42}\text{N}_2\text{NaO}_2\text{S}]^+$  ( $\text{M} + \text{Na}^+$ ) 577.2859, found 577.2851.

**(R)-N-(1-(4-(dimethylamino)phenyl)-5-phenylpent-1-yn-3-yl)-N-((2,6-dimethylphenyl)ethynyl)-4-methylbenzenesulfonamide ((+)-1as)**

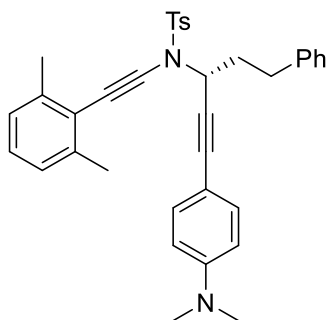

(+)-**1as**

Compound (+)-**1as** was prepared in 35% yield (39.3 mg) according to the general procedure. Pale yellow oil, (eluent: PE/DCM = 2/1).  $[\alpha]_D^{25} = +88.1^\circ$  ( $c = 1.0$ ,  $\text{CHCl}_3$ ). 94% ee (determined by HPLC: Chiralpak IE Column, 10/90 *i*-PrOH/hexane, 1.0 mL/min, 254 nm; TR = 10.66 min (minor), 12.42 min (major)).

**4-((4*R*)-3-(2,6-dimethylphenyl)-5-phenyl-1-tosyl-1,4,5,6-tetrahydrocyclopenta[*b*]pyrrol-4-yl)-*N,N*-dimethylaniline ((-)-2as)**

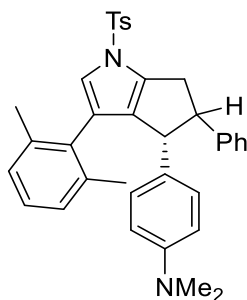

(-)-**2as**

Compound (-)-**2as** was prepared in 41% yield (45.9 mg) according to the general procedure. Pale yellow oil, (eluent: PE/DCM = 2/1). dr = 1:1.3 (determined by  $^1\text{H}$  NMR analysis of the reaction mixture).  $[\alpha]_D^{25} = -65.3^\circ$  ( $c = 1.0$ ,  $\text{CHCl}_3$ ). 88% ee, 81% ee (determined by HPLC: Chiralpak IG Column, 3/97 *i*-PrOH/hexane, 1.0 mL/min, 254 nm; TR = 16.84 min, 18.96 min, 21.01 min, 23.09 min).  $^1\text{H}$  NMR (600 MHz,  $\text{CDCl}_3$ )  $\delta$  7.86 – 7.70 (m, 2H), 7.41 – 7.29 (m, 2H), 7.19 – 6.76 (m, 9H), 6.65 – 6.37 (m, 2H), 6.27 – 6.08 (m, 2H), 4.31 – 4.22 (m, 0.5H), 3.93 (d,  $J = 7.2$  Hz, 0.5H), 3.79 – 3.68 (m, 1H), 3.63 – 3.54 (m, 0.5H), 3.33 – 3.15 (m, 1H), 3.07 – 2.95 (m, 0.5H), 2.86 – 2.68 (m, 6H), 2.48 (s, 3H), 2.07 – 1.93 (m, 3H), 1.78 – 1.69 (m, 3H);  $^{13}\text{C}$  NMR (150 MHz,  $\text{CDCl}_3$ )  $\delta$  149.3, 149.0, 146.5, 144.7, 140.4, 137.1(2), 137.0(5), 136.9, 136.3(3),

136.2(5), 135.9, 135.8, 132.9, 132.6, 132.1, 129.9, 128.8, 128.5, 128.4, 128.0, 127.5, 127.4, 127.1, 126.9, 126.8, 126.7(1), 126.7(0), 126.6, 126.5, 126.4, 126.3, 125.9, 124.5, 124.3, 122.4, 121.8, 112.6, 112.1, 58.9, 56.0, 53.7, 49.6, 40.8, 40.8, 35.0, 31.3, 21.7, 20.6, 20.4; IR (neat): 2930, 2853, 1615, 1590, 1375, 1160, 1015, 815; HRESIMS Calcd for  $[\text{C}_{36}\text{H}_{36}\text{N}_2\text{NaO}_2\text{S}]^+$  ( $\text{M} + \text{Na}^+$ ) 583.2390, found 583.2382.

## 5. Synthetic Transformations

### (*S*)-4-(3'-(2,6-dimethylphenyl)-1'-tosyl-4',6'-dihydro-1'*H*-spiro[cyclohexane-1,5'-cyclopenta[*b*]pyrrol]-4'-yl)-*N,N*-dimethylaniline ((+)-**2a**)

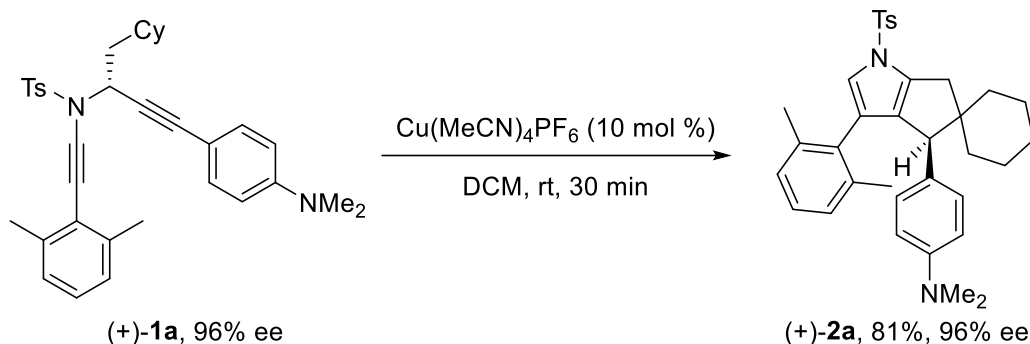

The powered  $\text{Cu}(\text{MeCN})_4\text{PF}_6$  (0.01 mmol, 3.8 mg) was introduced into an oven-dried Schlenk tube under  $\text{N}_2$  atmosphere. After DCM (1 mL) was injected into the Schlenk tube, *N*-propargyl ynamide (+)-**1a** (0.1 mmol, 55.3 mg, 96% ee) in DCM (1 mL) was added into the system. The resulting mixture was stirred at room temperature and the progress of the reaction was monitored by TLC. After concentration in vacuo, the residue was purified by column chromatography on silica gel (eluent: hexanes/EtOAc) to give the final product (+)-**2a** in 81% yield (44.7 mg). Pale yellow oil, (eluent: PE/DCM = 2/1).  $[\alpha]_{\text{D}}^{25} = +47.3^\circ$  ( $c = 1.0$ ,  $\text{CHCl}_3$ ). 96% ee (determined by HPLC: Chiralpak IE Column, 2/98 *i*-PrOH/hexane, 1.0 mL/min, 254 nm; TR = 9.93 min (major), 11.36 min (minor)).

### (*R*)-4-(3'-(2,6-dimethylphenyl)-4',6'-dihydro-1'*H*-spiro[cyclohexane-1,5'-cyclopenta[*b*]pyrrol]-4'-yl)-*N,N*-dimethylaniline (**3aa**)

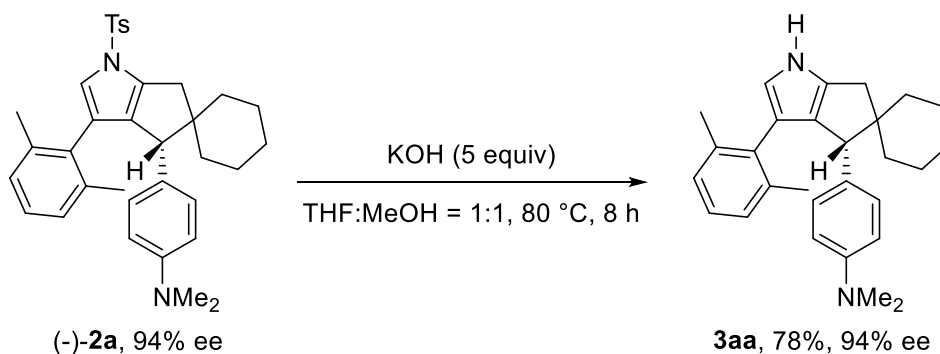

Compound **3aa** was prepared in 78% yield (0.1 mmol scale, 31.1 mg) according to the known procedure<sup>2</sup>. To a solution of the compound (-)-**2a** (0.1 mmol, 55.3 mg) in THF

(1 mL) and MeOH (1 mL) was added KOH (0.5 mmol, 28.1 mg), and the reaction was stirred at 80 °C for 8 hours. The progress of the reaction was monitored by TLC. Upon completion, the reaction was quenched with water and extracted with DCM (3 x 5 mL). The combined organic layers were dried over anhydrous MgSO<sub>4</sub> and concentrated under vacuum. The crude product was purified by column chromatography on silica gel (eluent: PE/EtOAc = 5/1) to afford the desired product **3aa**. Colourless oil.  $[\alpha]_D^{25} = -33.6^\circ$  (*c* = 1.0, CHCl<sub>3</sub>). 94% ee (determined by HPLC: Chiralpak IE Column, 5/95 *i*-PrOH/hexane, 1.0 mL/min, 254 nm; TR = 10.11 min (minor), 11.64 min (major)). <sup>1</sup>H NMR (400 MHz, CDCl<sub>3</sub>) δ 7.85 (s, 1H), 6.92 (d, *J* = 4.0 Hz, 2H), 6.85 – 6.80 (m, 1H), 6.71 (d, *J* = 8.4 Hz, 2H), 6.48 (d, *J* = 8.8 Hz, 2H), 6.42 (d, *J* = 2.4 Hz, 1H), 3.41 (s, 1H), 2.82 (s, 6H), 2.67 (s, 2H), 2.11 (s, 3H), 1.84 (s, 3H), 1.63 – 1.39 (m, 6H), 1.21 – 1.11 (m, 3H), 0.99 – 0.90 (m, 1H); <sup>13</sup>C NMR (100 MHz, CDCl<sub>3</sub>) δ 148.8, 137.8, 137.5, 136.0, 134.3, 131.3, 129.2, 129.1, 126.6, 126.3, 125.8, 118.9, 117.4, 112.0, 56.3, 54.5, 40.9, 39.2, 35.7, 35.5, 26.2, 23.7, 23.6, 20.9; IR (neat): 2920, 2850, 1616, 1595, 1515, 1255, 1149, 1118, 815, 617; HRESIMS Calcd for [C<sub>28</sub>H<sub>35</sub>N<sub>2</sub>]<sup>+</sup> (*M* + *H*<sup>+</sup>) 399.2795, found 399.2795.

**4-((4*R*,6*a*'*R*)-3'-(2,6-dimethylphenyl)-1'-tosyl-2',4',6',6*a*'-tetrahydro-1'*H*-spiro[cyclohexane-1,5'-cyclopenta[*b*]pyrrol]-4'-yl)-*N,N*-dimethylaniline (**3ab**)**

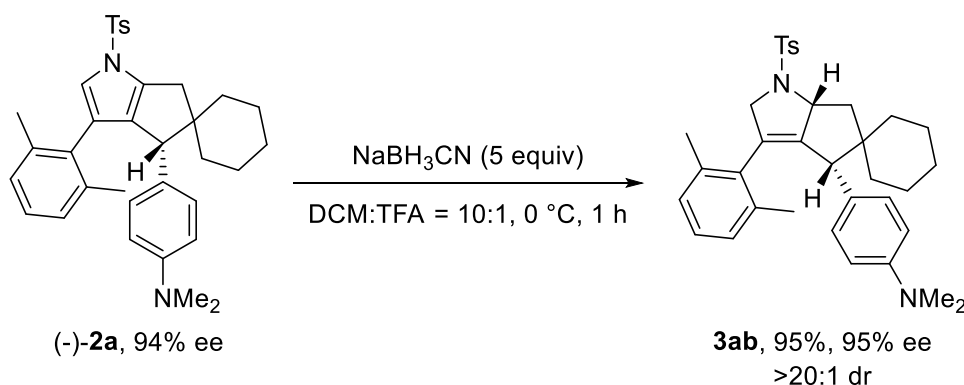

Compound **3ab** was prepared in 95% yield (0.1 mmol scale, 52.7 mg) with >20:1 dr according to the known procedure<sup>3</sup>. To a solution of the compound (-)-**2a** (0.1 mmol, 55.3 mg) in DCM (1 mL) and TFA (0.1 mL) was added NaBH<sub>3</sub>CN (0.5 mmol, 31.4 mg), and the reaction was stirred at 0 °C for 1 hours. The progress of the reaction was

monitored by TLC. Upon completion, the reaction was quenched with aqueous NaHCO<sub>3</sub> and extracted with DCM (3 x 5 mL). The combined organic layers were dried over anhydrous MgSO<sub>4</sub> and concentrated under vacuum. The crude product was purified by column chromatography on silica gel (eluent: PE/EtOAc = 5/1) to afford the desired product **3ab**. Colourless oil.  $[\alpha]_D^{25} = -86.4^\circ$  (c = 1.0, CHCl<sub>3</sub>). 95% ee (determined by HPLC: Chiralpak ADH Column, 5/95 *i*-PrOH/hexane, 1.0 mL/min, 254 nm; TR = 5.82 min (minor), 7.36 min (major)). <sup>1</sup>H NMR (500 MHz, CDCl<sub>3</sub>) δ 7.76 (d, *J* = 8.0 Hz, 2H), 7.36 (d, *J* = 8.0 Hz, 2H), 6.82 – 6.73 (m, 2H), 6.64 – 6.52 (m, 3H), 6.21 (d, *J* = 8.5 Hz, 2H), 4.55 – 4.37 (m, 2H), 3.98 (dt, *J* = 12.0, 3.5 Hz, 1H), 2.99 (d, *J* = 3.5 Hz, 1H), 2.73 (s, 6H), 2.45 (s, 3H), 2.43 – 2.37 (m, 1H), 2.32 (s, 3H), 1.92 – 1.82 (m, 1H), 1.74 (s, 3H), 1.57 – 1.26 (m, 8H), 1.06 – 0.83 (m, 2H); <sup>13</sup>C NMR (125 MHz, CDCl<sub>3</sub>) δ 148.9, 145.6, 143.5, 136.4, 135.6, 132.9, 131.8, 130.3, 129.7, 128.1, 127.2, 127.1, 126.6, 125.1, 124.7, 111.4, 68.6, 61.8, 55.1, 50.1, 42.0, 40.8, 39.3, 36.5, 25.6, 23.4, 22.3, 21.5, 20.4, 20.3; IR (neat): 2926, 2851, 1617, 1521, 1446, 1348, 1164, 1069, 812, 763; HRESIMS Calcd for [C<sub>35</sub>H<sub>42</sub>N<sub>2</sub>NaO<sub>2</sub>S]<sup>+</sup> (M + Na<sup>+</sup>) 577.2859, found 577.2868.

**dimethyl (1*R*,6*S*)-1'-(4-(dimethylamino)phenyl)-7'-(2,6-dimethylphenyl)-8'-tosyl-1',6'-dihydro-3'*H*-spiro[cyclohexane-1,2'-[3a,6]epiminoindene]-4',5'-dicarboxylate (**3ac**)**

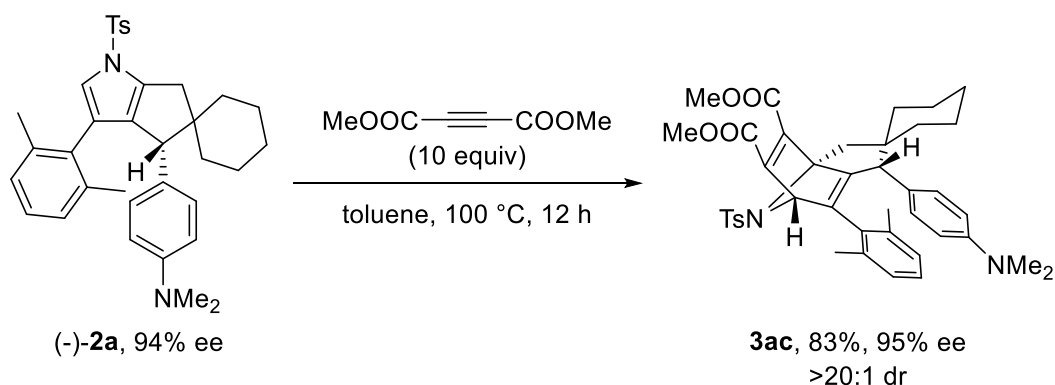

Compound **3ac** was prepared in 83% yield (0.1 mmol scale, 57.7 mg) with >20:1 dr according to the known procedure<sup>5</sup>. To a solution of the compound (-)-**2a** (0.1 mmol, 55.3 mg) in toluene (1 mL) was added dimethyl acetylenedicarboxylate (1 mmol, 123

$\mu\text{L}$ ), and the reaction was stirred at 100 °C for 12 hours. The progress of the reaction was monitored by TLC. Upon completion, the reaction was concentrated under vacuum. The crude product was purified by column chromatography on silica gel (eluent: PE/EtOAc = 3/1) to afford the desired product **3ac**. Colourless solid (mp 188–189 °C).  $[\alpha]_{\text{D}}^{25} = -44.9^\circ$  ( $c = 1.0$ ,  $\text{CHCl}_3$ ). 95% ee (determined by HPLC: Chiralpak IE Column, 30/70 *i*-PrOH/hexane, 1.0 mL/min, 254 nm; TR = 8.29 min (minor), 9.71 min (major)).  $^1\text{H}$  NMR (500 MHz,  $\text{CDCl}_3$ )  $\delta$  7.63 (d,  $J = 8.0$  Hz, 2H), 7.29 – 7.26 (m, 2H), 7.00 (d,  $J = 7.5$  Hz, 1H), 6.90 – 6.86 (m, 1H), 6.61 – 6.43 (m, 3H), 6.22 (d,  $J = 8.5$  Hz, 2H), 5.52 (s, 1H), 3.72 (s, 3H), 3.56 (s, 3H), 3.39 (s, 1H), 3.23 (d,  $J = 15.5$  Hz, 1H), 2.76 (s, 6H), 2.50 (s, 3H), 2.42 (s, 3H), 2.04 (dd,  $J = 15.5, 1.5$  Hz, 1H), 1.73 – 1.66 (m, 1H), 1.59 – 1.47 (m, 6H), 1.45 (s, 3H), 0.92 – 0.79 (m, 3H);  $^{13}\text{C}$  NMR (100 MHz,  $\text{CDCl}_3$ )  $\delta$  164.9, 162.0, 161.5, 154.1, 149.2, 146.7, 143.6, 141.8, 136.4, 135.8, 135.5, 132.2, 130.6, 129.8, 128.5, 127.4, 127.2, 126.9, 121.7, 111.0, 86.8, 76.2, 57.9, 52.9, 51.9(3), 51.8(8), 40.6, 37.3, 30.8, 30.1, 25.6, 23.5, 21.9, 21.5, 20.6, 19.7; IR (neat): 2925, 2850, 1636, 1517, 1453, 1349, 1159, 1106, 650; HRESIMS Calcd for  $[\text{C}_{41}\text{H}_{46}\text{N}_2\text{NaO}_6\text{S}]^+$  ( $\text{M} + \text{Na}^+$ ) 717.2969, found 717.2960.

**(*R*)-4'-([1,1'-biphenyl]-4-yl)-3'-(2,6-dimethylphenyl)-1'-tosyl-4',6'-dihydro-1'*H*-spiro[cyclohexane-1,5'-cyclopenta[*b*]pyrrole] (3ad)**

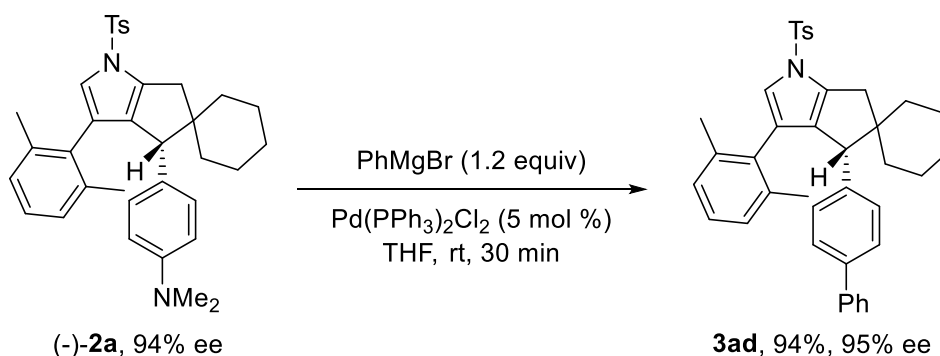

Compound **3ad** was prepared in 94% yield (0.1 mmol scale, 55.1 mg) according to the known procedure<sup>3</sup>. To a dry Schlenk tube were added the compound (-)-**2a** (0.1 mmol, 55.3 mg),  $\text{Pd}(\text{PPh}_3)_2\text{Cl}_2$  (0.005 mmol, 3.5 mg) and freshly distilled THF (1 mL) under nitrogen atmosphere. Next, phenyl magnesium bromide (1 M, 0.12 mmol, 120  $\mu\text{L}$ ) was added slowly at room temperature and stirred at this temperature for 30 min. The



progress of the reaction was monitored by TLC. Upon completion, the reaction was quenched with aqueous  $\text{NH}_4\text{Cl}$ . The resulting mixture was extracted with DCM (3 x 5 mL). The combined organic layers were dried over anhydrous  $\text{MgSO}_4$  and concentrated under vacuum. The crude product was purified by column chromatography on silica gel (eluent: PE/EtOAc = 8/1) to afford the desired product **3ad**. Colourless oil.  $[\alpha]_D^{25} = -54.6^\circ$  ( $c = 1.0$ ,  $\text{CHCl}_3$ ). 95% ee (determined by HPLC: Chiralpak IE Column, 5/95 *i*-PrOH/hexane, 1.0 mL/min, 254 nm; TR = 8.50 min (major), 9.58 min (minor)).  $^1\text{H}$  NMR (400 MHz,  $\text{CDCl}_3$ )  $\delta$  7.77 (d,  $J = 8.4$  Hz, 2H), 7.53 – 7.45 (m, 2H), 7.39 – 7.23 (m, 7H), 6.99 – 6.86 (m, 3H), 6.76 (d,  $J = 6.8$  Hz, 1H), 6.67 (d,  $J = 8.0$  Hz, 2H), 3.36 (s, 1H), 2.97 (d,  $J = 16.4$  Hz, 1H), 2.79 (d,  $J = 16.4$  Hz, 1H), 2.46 (s, 3H), 1.97 (s, 3H), 1.74 – 1.64 (m, 1H), 1.61 (s, 3H), 1.59 – 1.42 (m, 4H), 1.30 – 1.08 (m, 4H), 1.02 – 0.90 (m, 1H);  $^{13}\text{C}$  NMR (100 MHz,  $\text{CDCl}_3$ )  $\delta$  144.7, 140.9, 139.7, 138.7, 137.3, 136.9, 136.8, 136.4, 135.9, 132.7, 129.7, 128.9, 128.6, 126.9(3), 126.8(8), 126.8, 126.7, 126.0, 125.0, 121.7, 56.2, 54.0, 39.1, 37.1, 35.1, 25.9, 23.3, 21.6, 20.6, 20.2; IR (neat): 2925, 2852, 1646, 1597, 1487, 1415, 1304, 1269, 1051, 812; HRESIMS Calcd for  $[\text{C}_{39}\text{H}_{39}\text{NNaO}_2\text{S}]^+$  ( $\text{M} + \text{Na}^+$ ) 608.2594, found 608.2598.

**(*R*)-4-(3'-(2,6-dimethylphenyl)-1'-tosyl-4',6'-dihydro-1'*H*-spiro[cyclohexane-1,5'-cyclopenta[*b*]pyrrol]-4'-yl)aniline (3fa)**

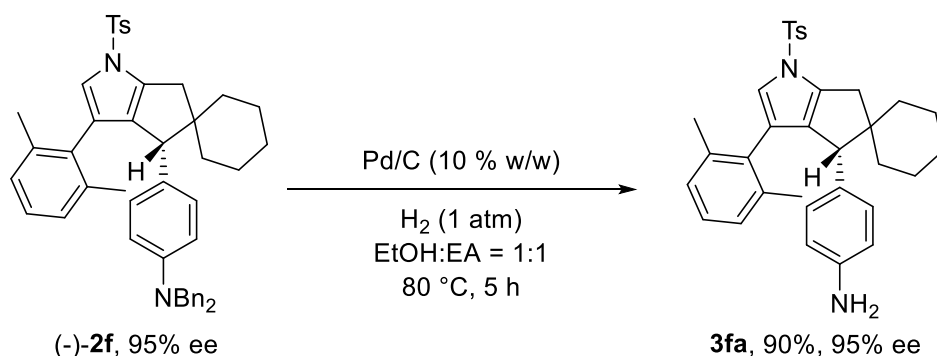

Compound **3fa** was prepared in 90% yield (0.1 mmol scale, 47.3 mg) according to the known procedure<sup>3</sup>. To a solution of the compound (-)-**2f** (0.1 mmol, 70.5 mg) in MeOH (1 mL) and EtOAc (1 mL) was added Pd/C (10% w/w, 7.1 mg), and the reaction was stirred at 80 °C under  $\text{H}_2$  (1 atm) for 5 hours. The progress of the reaction was monitored by TLC. Upon completion, the reaction was concentrated under vacuum. The crude

product was purified by column chromatography on silica gel (eluent: PE/EtOAc = 4/1) to afford the desired product **3fa**. Colourless oil.  $[\alpha]_D^{25} = -88.1^\circ$  ( $c = 1.0$ ,  $\text{CHCl}_3$ ). 95% ee (determined by HPLC: Chiralpak ADH Column, 10/90 *i*-PrOH/hexane, 1.0 mL/min, 254 nm; TR = 14.33 min (major), 16.44 min (minor)).  $^1\text{H}$  NMR (600 MHz,  $\text{CDCl}_3$ )  $\delta$  7.74 (d,  $J = 8.4$  Hz, 2H), 7.31 (d,  $J = 8.4$  Hz, 2H), 6.95 (t,  $J = 7.2$  Hz, 1H), 6.90 (d,  $J = 7.2$  Hz, 1H), 6.87 (s, 1H), 6.79 (d,  $J = 7.2$  Hz, 1H), 6.39 (d,  $J = 7.8$  Hz, 2H), 6.34 (d,  $J = 9.0$  Hz, 2H), 3.43 (s, 2H), 3.21 (s, 1H), 2.90 (d,  $J = 16.2$  Hz, 1H), 2.71 (d,  $J = 16.2$  Hz, 1H), 2.45 (s, 3H), 1.94 (s, 3H), 1.65 (s, 3H), 1.63 – 1.36 (m, 6H), 1.22 – 1.11 (m, 2H), 1.09 – 1.02 (m, 1H), 0.95 – 0.86 (m, 1H);  $^{13}\text{C}$  NMR (150 MHz,  $\text{CDCl}_3$ )  $\delta$  144.5, 144.2, 137.1, 136.9, 136.9, 136.4, 136.2, 132.9, 130.7, 129.7, 129.2, 126.8(4), 126.8(3), 126.5(0), 126.4(7), 125.1, 121.6, 114.4, 55.8, 53.8, 38.9, 36.9, 35.1, 26.0, 23.3, 21.6, 20.5, 20.3; IR (neat): 3440, 2925, 2851, 1620, 1610, 1596, 1530, 1343, 1267, 1101, 815; HRESIMS Calcd for  $[\text{C}_{33}\text{H}_{37}\text{N}_2\text{O}_2\text{S}]^+$  ( $\text{M} + \text{H}^+$ ) 525.2570, found 525.2577.

**(R)-4-bromo-N-(4-(3'-(2,6-dimethylphenyl)-1'-tosyl-4',6'-dihydro-1'H-spiro[cyclohexane-1,5'-cyclopenta[b]pyrrol]-4'-yl)phenyl)benzamide (3fb)**

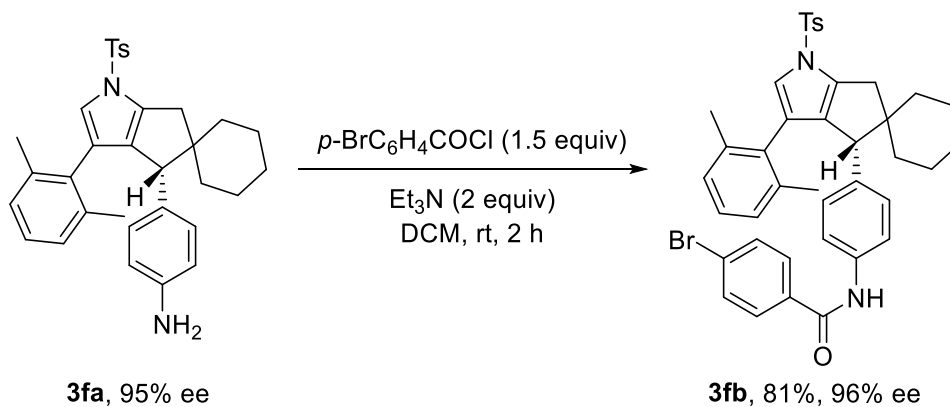

To the solution of the **3fa** (0.1 mmol, 52.5 mg) and  $\text{Et}_3\text{N}$  (0.2 mmol, 28  $\mu\text{L}$ ) in DCM (3 mL) was added  $p\text{-BrC}_6\text{H}_4\text{COCl}$  (0.15 mmol, 38.3 mg) at room temperature and stirred for additional 2 h. The progress of the reaction was monitored by TLC. Upon completion, the reaction was quenched with water. The resulting mixture was extracted with DCM (3 x 5 mL). The combined organic layers was dried over anhydrous  $\text{MgSO}_4$  and concentrated under vacuum. The residue was purified by column chromatography on silica gel (eluent: PE/EtOAc = 8/1) to give the desired product **3fb** in 81% yield

(57.3 mg). Colourless solid (mp 144–145 °C).  $[\alpha]_D^{25} = -62.2^\circ$  ( $c = 1.0$ ,  $\text{CHCl}_3$ ). 96% ee (determined by HPLC: Chiralpak ODH Column, 5/95 *i*-PrOH/hexane, 1.0 mL/min, 254 nm; TR = 14.35 min (major), 15.05 min (minor)).  $^1\text{H}$  NMR (600 MHz,  $\text{CDCl}_3$ )  $\delta$  7.86 (s, 1H), 7.74 (d,  $J = 8.4$  Hz, 2H), 7.65 (d,  $J = 8.4$  Hz, 2H), 7.53 (d,  $J = 8.4$  Hz, 2H), 7.33 (d,  $J = 8.4$  Hz, 2H), 7.30 (d,  $J = 8.4$  Hz, 2H), 6.97 – 6.86 (m, 3H), 6.77 (d,  $J = 7.2$  Hz, 1H), 6.61 (d,  $J = 7.8$  Hz, 2H), 3.33 (s, 1H), 2.93 (d,  $J = 16.2$  Hz, 1H), 2.74 (d,  $J = 16.2$  Hz, 1H), 2.47 (s, 3H), 1.96 (s, 3H), 1.73 – 1.61 (m, 5H), 1.60 – 1.31 (m, 6H), 1.06 – 1.01 (m, 1H), 0.90 – 0.86 (m, 1H);  $^{13}\text{C}$  NMR (150 MHz,  $\text{CDCl}_3$ )  $\delta$  164.6, 144.9, 137.3, 137.0, 136.9, 136.6, 136.2, 135.8, 135.4, 133.8, 132.7, 131.8, 129.8, 129.0, 128.6, 126.9(4), 126.9(1), 126.6, 126.5, 126.3, 124.9, 121.7, 119.2, 56.1, 54.1, 38.9, 36.8, 35.1, 25.9, 23.2(1), 23.1(9), 21.6, 20.5, 20.4; IR (neat): 2924, 2853, 1615, 1519, 1488, 1370, 1124, 1102, 816; HRESIMS Calcd for  $[\text{C}_{40}\text{H}_{40}\text{BrN}_2\text{O}_3\text{S}]^+$  ( $\text{M} + \text{H}^+$ ) 707.1938, found 707.1946.

**dimethyl (1'*R*,6'*S*)-1'-(4-(dibenzylamino)phenyl)-7'-(2,6-dimethylphenyl)-8'-tosyl-1',6'-dihydro-3'*H*-spiro[cyclohexane-1,2'-[3a,6]epiminoindene]-4',5'-dicarboxylate (3fc)**

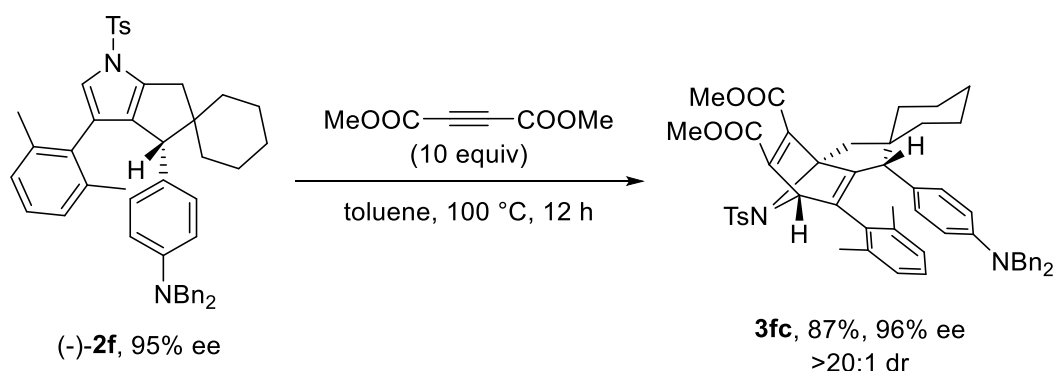

Compound **3fc** was prepared in 87% yield (0.1 mmol scale, 73.6 mg) with >20/1 dr according to the known procedure<sup>5</sup>. To a solution of the compound (-)-**2f** (0.1 mmol, 70.5 mg) in toluene (1 mL) was added dimethyl acetylenedicarboxylate (1 mmol, 123  $\mu\text{L}$ ), and the reaction was stirred at 100 °C for 12 hours. The progress of the reaction was monitored by TLC. Upon completion, the reaction was concentrated under vacuum. The crude product was purified by column chromatography on silica gel (eluent:

PE/EtOAc = 3/1) to afford the desired product **3ac**. Colourless solid (mp 177–178 °C).  $[\alpha]_D^{25} = -120.5^\circ$  ( $c = 1.0$ ,  $\text{CHCl}_3$ ). 96% ee (determined by HPLC: Chiralpak IE Column, 20/80 *i*-PrOH/hexane, 1.0 mL/min, 254 nm; TR = 12.37 min (minor), 15.20 min (major)).  $^1\text{H NMR}$  (400 MHz,  $\text{CDCl}_3$ )  $\delta$  7.63 (d,  $J = 8.4$  Hz, 2H), 7.32 – 7.22 (m, 8H), 7.09 (d,  $J = 7.2$  Hz, 4H), 6.94 – 6.77 (m, 2H), 6.58 (d,  $J = 7.2$  Hz, 1H), 6.49 (d,  $J = 8.0$  Hz, 2H), 6.21 (d,  $J = 8.4$  Hz, 2H), 5.52 (s, 1H), 4.41 (q,  $J = 16.8$  Hz, 4H), 3.71 (s, 3H), 3.56 (s, 3H), 3.34 (s, 1H), 3.22 (d,  $J = 14.8$  Hz, 1H), 2.43 (s, 3H), 2.42 (s, 3H), 2.04 (d,  $J = 15.2$  Hz, 1H), 1.72 – 1.49 (m, 6H), 1.45 (s, 3H), 1.39 – 1.31 (m, 2H), 1.01 – 0.86 (m, 2H);  $^{13}\text{C NMR}$  (150 MHz,  $\text{CDCl}_3$ )  $\delta$  171.1, 164.9, 162.0, 161.9, 154.1, 147.7, 146.7, 143.6, 141.7, 138.7, 136.5, 135.9, 135.4, 132.1, 130.9, 129.8, 128.5, 128.4, 127.4, 127.2, 126.8, 126.7, 126.5, 121.7, 110.7, 86.7, 76.1, 60.4, 57.9, 53.7, 52.8, 52.0, 51.9, 37.3, 30.8, 30.2, 25.6, 23.5, 21.9, 21.5, 21.0, 20.5, 19.8, 14.2; IR (neat): 2924, 2851, 1626, 1518, 1453, 1350, 1243, 1157, 1106, 815; HRESIMS Calcd for  $[\text{C}_{53}\text{H}_{55}\text{N}_2\text{O}_6\text{S}]^+$  ( $\text{M} + \text{Na}^+$ ) 847.3775, found 847.3784.

## 6. Crystal Data

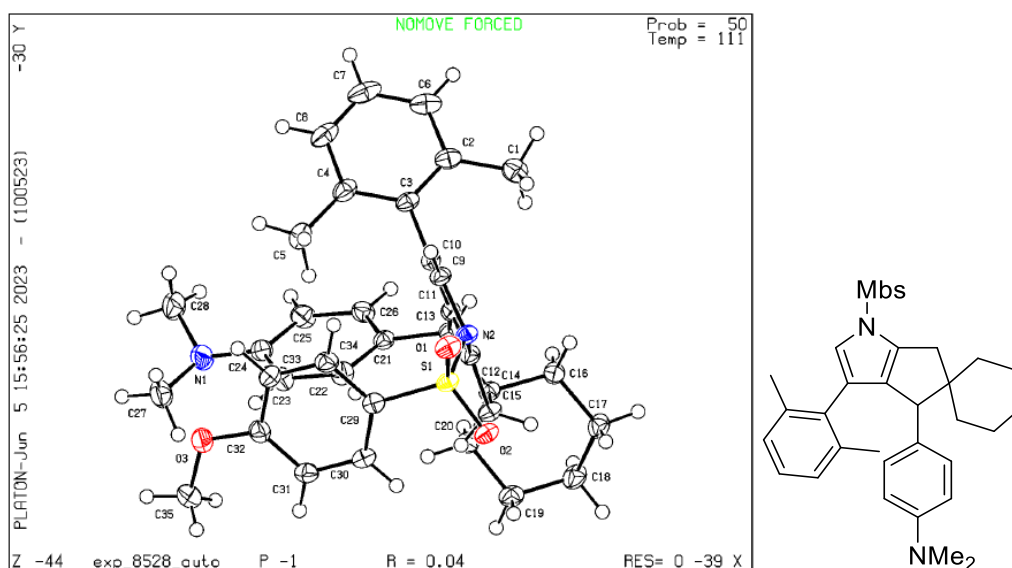

Bond precision: C-C = 0.0018 Å

Wavelength=1.54184

Cell: a=10.9798 (2)

b=11.0505 (2)

c=12.7508 (1)

alpha=86.375 (1)

beta=83.639 (1)

gamma=82.282 (2)

Temperature:

111 K

|                        | Calculated                                                      | Reported                                                        |
|------------------------|-----------------------------------------------------------------|-----------------------------------------------------------------|
| Volume                 | 1521.79 (4)                                                     | 1521.79 (4)                                                     |
| Space group            | P -1                                                            | P -1                                                            |
| Hall group             | -P 1                                                            | -P 1                                                            |
| Moiety formula         | C <sub>35</sub> H <sub>40</sub> N <sub>2</sub> O <sub>3</sub> S | C <sub>35</sub> H <sub>40</sub> N <sub>2</sub> O <sub>3</sub> S |
| Sum formula            | C <sub>35</sub> H <sub>40</sub> N <sub>2</sub> O <sub>3</sub> S | C <sub>35</sub> H <sub>40</sub> N <sub>2</sub> O <sub>3</sub> S |
| Mr                     | 568.75                                                          | 568.75                                                          |
| Dx, g cm <sup>-3</sup> | 1.241                                                           | 1.241                                                           |
| Z                      | 2                                                               | 2                                                               |
| Mu (mm <sup>-1</sup> ) | 1.235                                                           | 1.235                                                           |
| F <sub>000</sub>       | 608.0                                                           | 608.0                                                           |
| F <sub>000</sub> '     | 610.27                                                          |                                                                 |
| h, k, lmax             | 13, 13, 15                                                      | 13, 13, 15                                                      |
| Nref                   | 6275                                                            | 5965                                                            |
| Tmin, Tmax             | 0.976, 0.976                                                    | 0.886, 1.000                                                    |
| Tmin'                  | 0.976                                                           |                                                                 |

Correction method= # Reported T Limits: Tmin=0.886 Tmax=1.000  
 AbsCorr = MULTI-SCAN

Data completeness= 0.951

Theta (max)= 75.148

R(reflections)= 0.0352 ( 5575)

WR2 (reflections)=  
 0.0951 ( 5965)

S = 1.066

Npar= 375

**Supplementary Figure 9.** Crystal data and structure refinement for (±)-2b.

CCDC Number = 2270341.

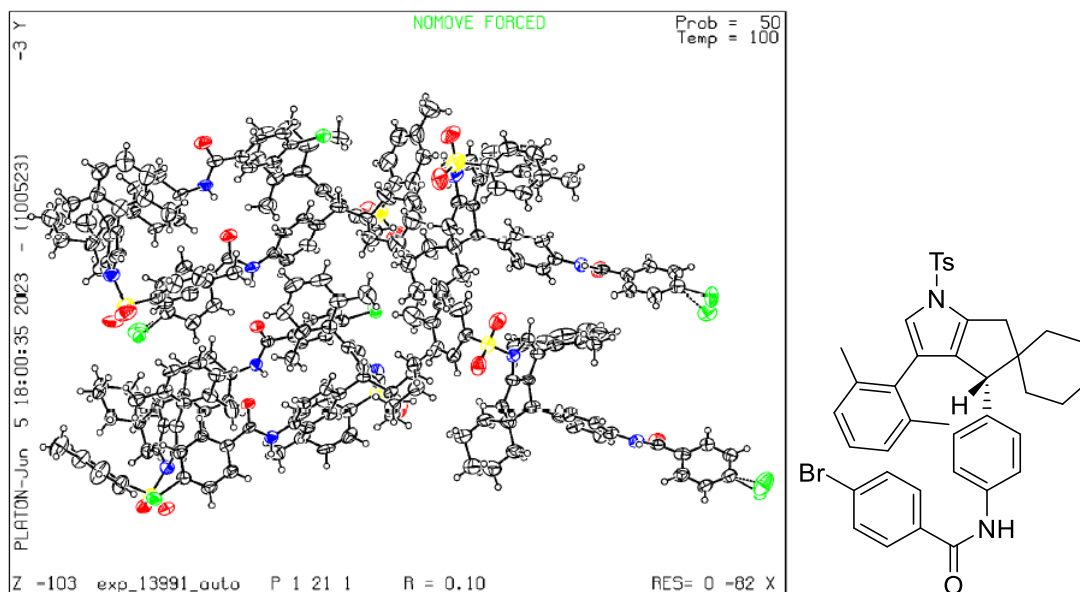

Bond precision: C-C = 0.0136 Å Wavelength=1.54184  
 Cell: a=18.2120 (2) b=10.4169 (1) c=54.5817 (5)  
 alpha=90 beta=91.514 (1) gamma=90  
 Temperature: 100 K

|                        | Calculated         | Reported           |
|------------------------|--------------------|--------------------|
| Volume                 | 10351.22 (18)      | 10351.22 (18)      |
| Space group            | P 21               | P 1 21 1           |
| Hall group             | P 2yb              | P 2yb              |
| Moiety formula         | C40 H39 Br N2 O3 S | C40 H39 Br N2 O3 S |
| Sum formula            | C40 H39 Br N2 O3 S | C40 H39 Br N2 O3 S |
| Mr                     | 707.69             | 707.70             |
| Dx, g cm <sup>-3</sup> | 1.362              | 1.362              |
| Z                      | 12                 | 12                 |
| Mu (mm <sup>-1</sup> ) | 2.510              | 2.510              |
| F000                   | 4416.0             | 4416.0             |
| F000'                  | 4422.53            |                    |
| h, k, lmax             | 21, 12, 65         | 21, 12, 65         |
| Nref                   | 36976 [ 19604 ]    | 36953              |
| Tmin, Tmax             | 0.817, 0.778       | 0.725, 1.000       |
| Tmin'                  | 0.741              |                    |

Correction method= # Reported T Limits: Tmin=0.725 Tmax=1.000  
 AbsCorr = MULTI-SCAN

Data completeness= 1.88/1.00 Theta (max)= 67.079

R(reflections)= 0.0955 ( 33929) wR2(reflections)=  
 0.2990 ( 36953)  
 S = 1.123 Npar= 2309

**Supplementary Figure 10.** Crystal data and structure refinement for (-)-**3fb**.

CCDC Number =2270342.

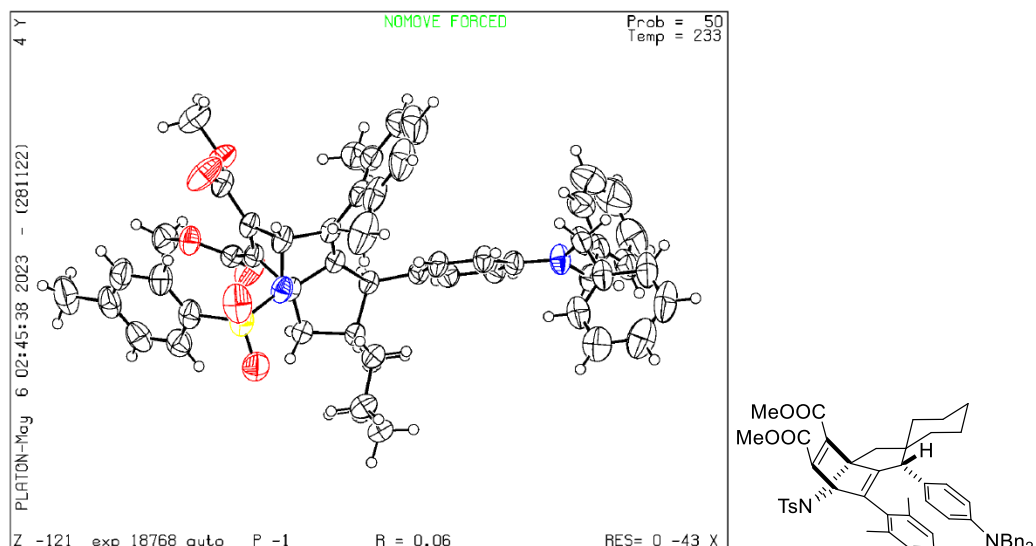

Bond precision: C-C = 0.0050 Å

Wavelength=1.54184

Cell: a=14.0153 (3) b=14.7720 (3) c=14.8716 (3)  
alpha=104.309 (2) beta=104.247 (2) gamma=112.795 (2)  
Temperature: 233 K

|                        | Calculated                  | Reported        |
|------------------------|-----------------------------|-----------------|
| Volume                 | 2541.03 (12)                | 2541.02 (10)    |
| Space group            | P -1                        | P -1            |
| Hall group             | -P 1                        | -P 1            |
| Moiety formula         | C53 H54 N2 O6 S [+ solvent] | C53 H54 N2 O6 S |
| Sum formula            | C53 H54 N2 O6 S [+ solvent] | C53 H54 N2 O6 S |
| Mr                     | 847.04                      | 847.04          |
| Dx, g cm <sup>-3</sup> | 1.107                       | 1.107           |
| Z                      | 2                           | 2               |
| Mu (mm <sup>-1</sup> ) | 0.940                       | 0.940           |
| F000                   | 900.0                       | 900.0           |
| F000'                  | 903.18                      |                 |
| h, k, lmax             | 17, 18, 18                  | 17, 18, 18      |
| Nref                   | 10667                       | 10427           |
| Tmin, Tmax             |                             | 0.819, 1.000    |
| Tmin'                  |                             |                 |

Correction method= # Reported T Limits: Tmin=0.819 Tmax=1.000  
AbsCorr = MULTI-SCAN

Data completeness= 0.978

Theta(max)= 76.394

R(reflections)= 0.0627 ( 8056)

wR2(reflections)=  
0.1844 ( 10427)

s = 1.067

Npar= 564

**Supplementary Figure 11.** Crystal data and structure refinement for (±)-**3fc**.

CCDC Number = 2270343.

## 7. Computational Studies

All calculations were performed using **Gaussian16** package<sup>6</sup>. Geometry optimizations and vibration frequencies were calculated by using **B3LYP-D3** level of theory<sup>7,8</sup> with the **LANL2DZ** basis set<sup>9,10</sup> and pseudopotential for the Cu atom, and the **6-31G(d,p)** basis set<sup>11</sup> for C, H, O, N and S atom. All the electronic energies were recomputed at **PBE0-D3**<sup>12</sup>/**Def2-TZVP**<sup>13</sup> level of theory. All local minimums were confirmed with no imaginary frequency and all transition states had only one imaginary frequency. And every transition state was checked by intrinsic reaction coordinate (IRC). The SMD solvation mode<sup>14</sup> with *m*-xylene was used for all calculations. The ball stick models of molecules were drawn by VMD<sup>15</sup>.

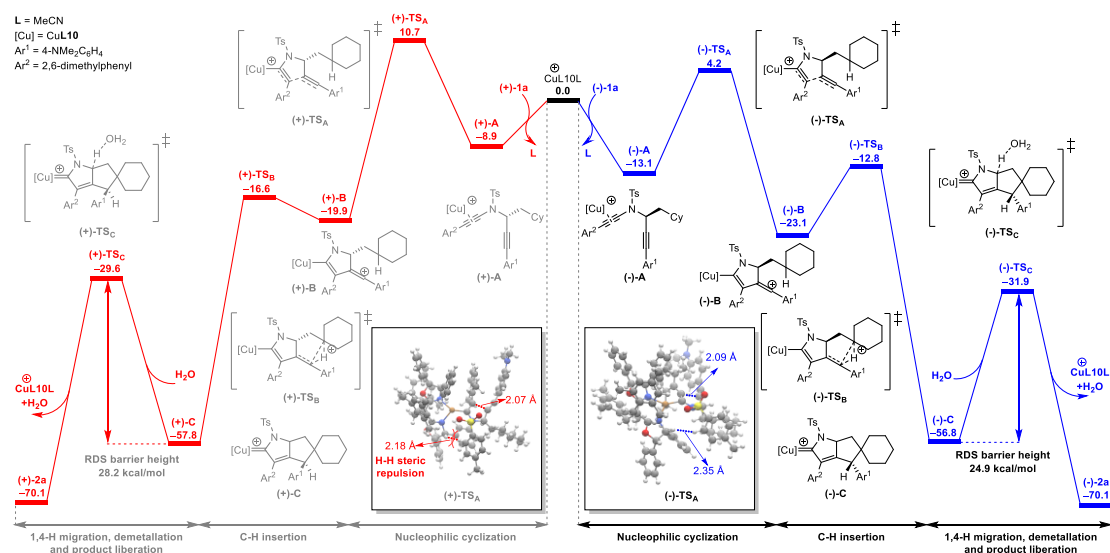

**Supplementary Figure 12.** Plausible reaction mechanism. Relative free energies ( $\Delta G$ , in kcal/mol) of all the transition states and intermediates were computed at the SMD(solvent = *m*-xylene)-PBE0-D3/Def2-TZVP//SMD(solvent = *m*-xylene)-B3LYP-D3/6-31G(d,p) level of theory



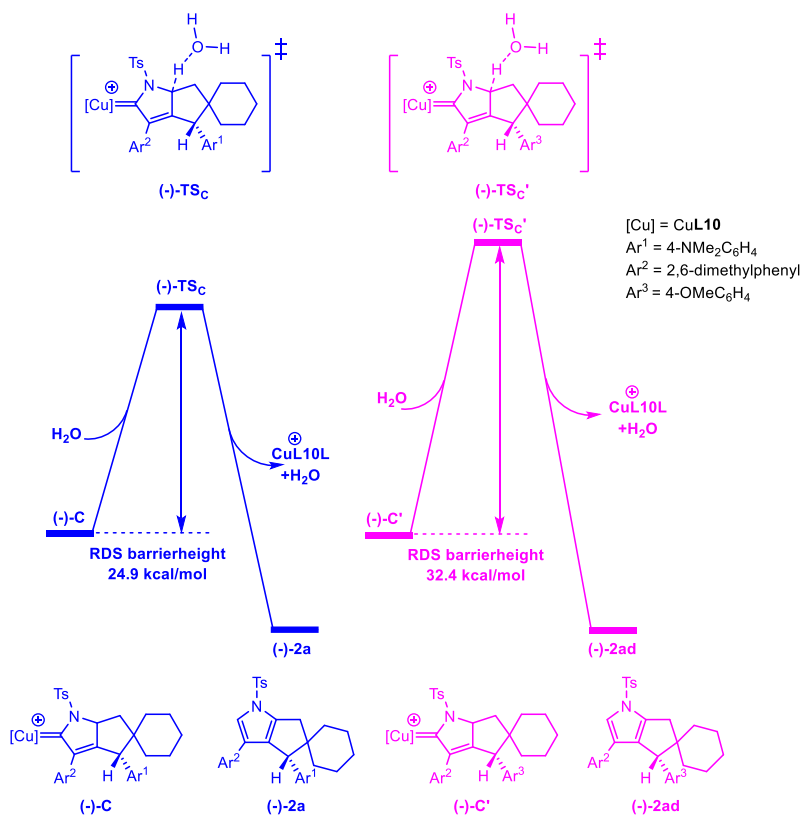

**Supplementary Figure 13.** Barrier-heights of the rate-determining step affording (-)-**2a** and (-)-**2ad**. Relative free energies ( $\Delta G$ , in kcal/mol) of all the transition states and intermediates were computed at the SMD(solvent = *m*xylene)-PBE0-D3/Def2-TZVP//SMD(solvent = *m*xylene)-B3LYP-D3/6-31G(d,p) level of theory.

## 8. HPLC Chromatograms

(+)-**1a**: IE, *i*-PrOH/hexane = 5/95,  $v = 1.0$  mL/min,  $\lambda = 254$  nm

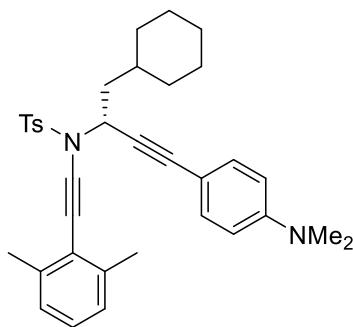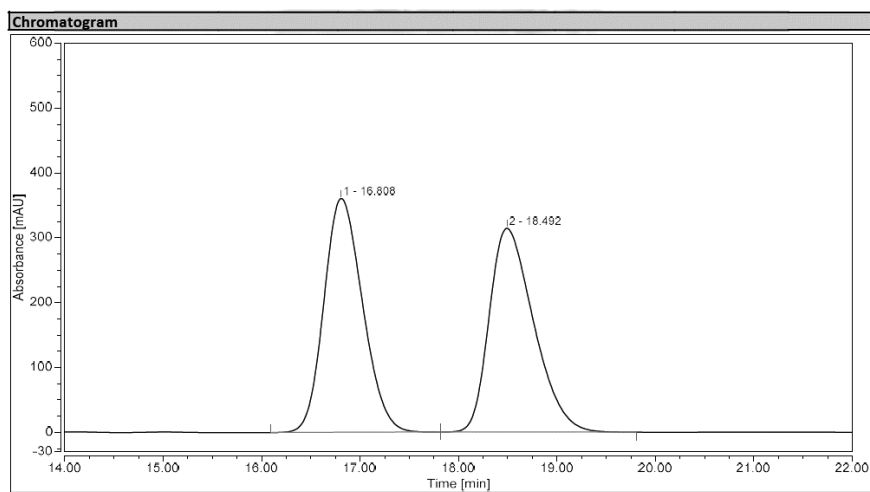

| No.           | Peak Name | Retention Time<br>min | Area<br>mAU*min | Height<br>mAU  | Relative Area<br>% | Relative Height<br>% | Amount<br>n.a. |
|---------------|-----------|-----------------------|-----------------|----------------|--------------------|----------------------|----------------|
| 1             |           | 16.808                | 164.035         | 360.612        | 49.97              | 53.45                | n.a.           |
| 2             |           | 18.492                | 164.247         | 314.045        | 50.03              | 46.55                | n.a.           |
| <b>Total:</b> |           |                       | <b>328.282</b>  | <b>674.657</b> | <b>100.00</b>      | <b>100.00</b>        |                |

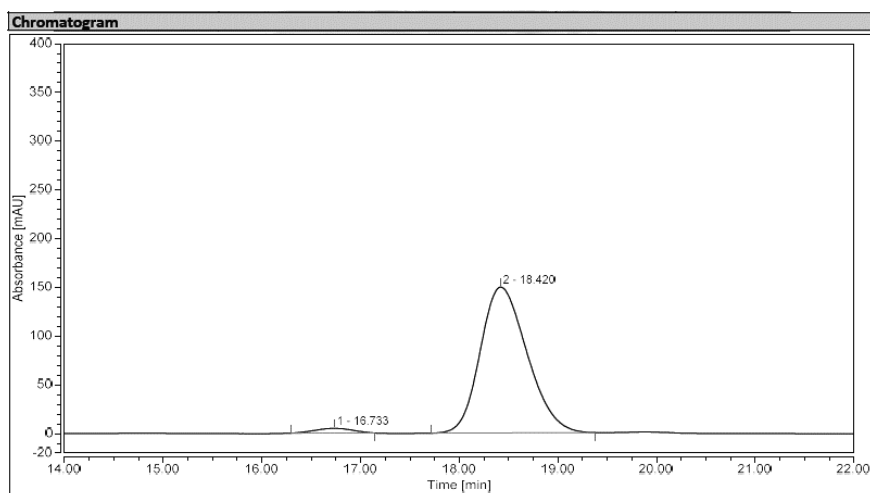

| No.           | Peak Name | Retention Time<br>min | Area<br>mAU*min | Height<br>mAU  | Relative Area<br>% | Relative Height<br>% | Amount<br>n.a. |
|---------------|-----------|-----------------------|-----------------|----------------|--------------------|----------------------|----------------|
| 1             |           | 16.733                | 2.092           | 4.783          | 2.48               | 3.10                 | n.a.           |
| 2             |           | 18.420                | 82.248          | 149.589        | 97.52              | 96.90                | n.a.           |
| <b>Total:</b> |           |                       | <b>84.339</b>   | <b>154.372</b> | <b>100.00</b>      | <b>100.00</b>        |                |

**Supplementary Figure 14.** HPLC spectrum for compound (+)-**1a**

(-)-2a: IE, *i*-PrOH/hexane = 5/95,  $v = 1.0$  mL/min,  $\lambda = 254$  nm

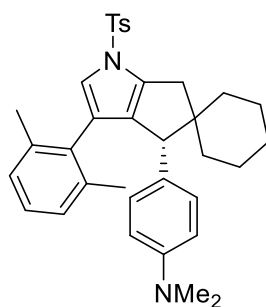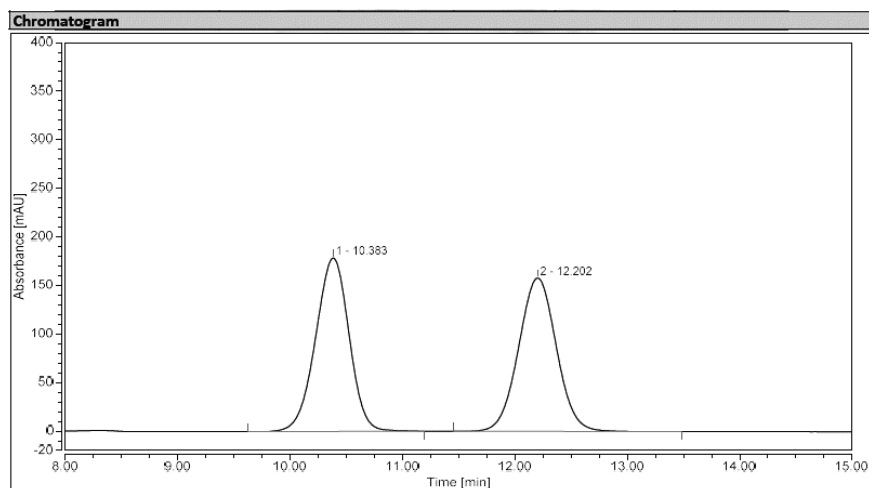

**Integration Results**

| No.           | Peak Name | Retention Time<br>min | Area<br>mAU*min | Height<br>mAU  | Relative Area<br>% | Relative Height<br>% | Amount<br>n.a. |
|---------------|-----------|-----------------------|-----------------|----------------|--------------------|----------------------|----------------|
| 1             |           | 10.383                | 61.722          | 178.498        | 50.13              | 53.07                | n.a.           |
| 2             |           | 12.202                | 61.410          | 157.843        | 49.87              | 46.93                | n.a.           |
| <b>Total:</b> |           |                       | <b>123.133</b>  | <b>336.341</b> | <b>100.00</b>      | <b>100.00</b>        |                |

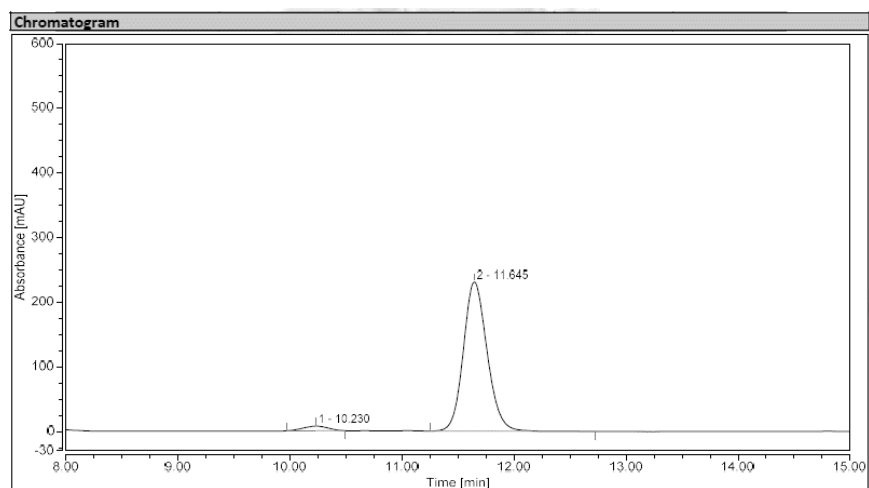

**Integration Results**

| No.           | Peak Name | Retention Time<br>min | Area<br>mAU*min | Height<br>mAU  | Relative Area<br>% | Relative Height<br>% | Amount<br>n.a. |
|---------------|-----------|-----------------------|-----------------|----------------|--------------------|----------------------|----------------|
| 1             |           | 10.230                | 1.832           | 7.160          | 3.13               | 3.01                 | n.a.           |
| 2             |           | 11.645                | 56.797          | 230.858        | 96.87              | 96.99                | n.a.           |
| <b>Total:</b> |           |                       | <b>58.629</b>   | <b>238.018</b> | <b>100.00</b>      | <b>100.00</b>        |                |

**Supplementary Figure 15.** HPLC spectrum for compound (-)-2a

(+)-**1b**: **IE**, *i*-PrOH/hexane = 20/80,  $v = 1.0 \text{ mL/min}$ ,  $\lambda = 254 \text{ nm}$

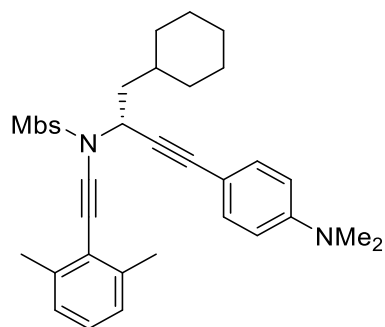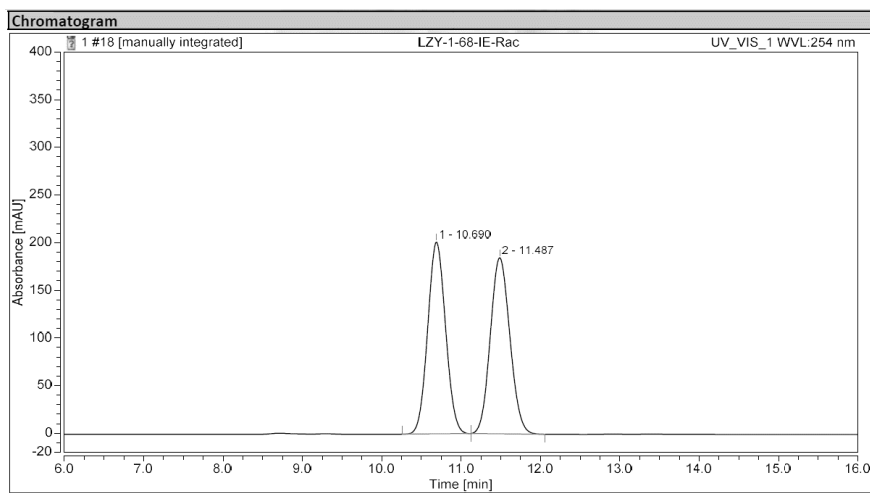

**Integration Results**

| No.           | Peak Name | Retention Time<br>min | Area<br>mAU*min | Height<br>mAU  | Relative Area<br>% | Relative Height<br>% | Amount<br>n.a. |
|---------------|-----------|-----------------------|-----------------|----------------|--------------------|----------------------|----------------|
| 1             |           | 10.690                | 52.776          | 201.365        | 50.02              | 52.14                | n.a.           |
| 2             |           | 11.487                | 52.731          | 184.812        | 49.98              | 47.86                | n.a.           |
| <b>Total:</b> |           |                       | <b>105.507</b>  | <b>386.177</b> | <b>100.00</b>      | <b>100.00</b>        |                |

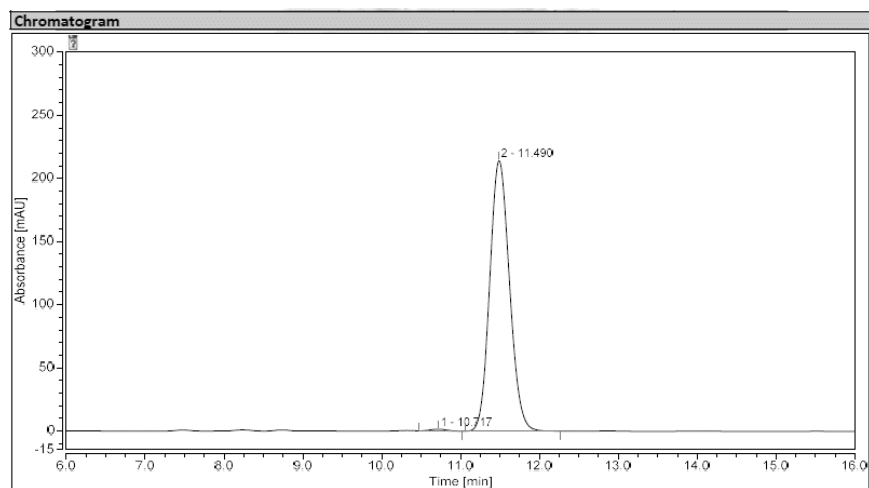

**Integration Results**

| No.           | Peak Name | Retention Time<br>min | Area<br>mAU*min | Height<br>mAU  | Relative Area<br>% | Relative Height<br>% | Amount<br>n.a. |
|---------------|-----------|-----------------------|-----------------|----------------|--------------------|----------------------|----------------|
| 1             |           | 10.717                | 0.337           | 1.423          | 0.54               | 0.66                 | n.a.           |
| 2             |           | 11.490                | 62.206          | 214.446        | 99.46              | 99.34                | n.a.           |
| <b>Total:</b> |           |                       | <b>62.543</b>   | <b>215.870</b> | <b>100.00</b>      | <b>100.00</b>        |                |

**Supplementary Figure 16.** HPLC spectrum for compound (+)-**1b**

(-)-2b: IE, *i*-PrOH/hexane = 20/80,  $v = 1.0$  mL/min,  $\lambda = 254$  nm

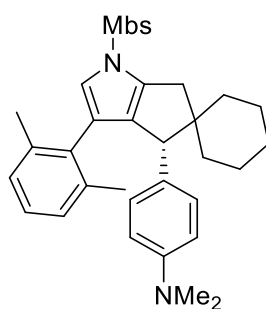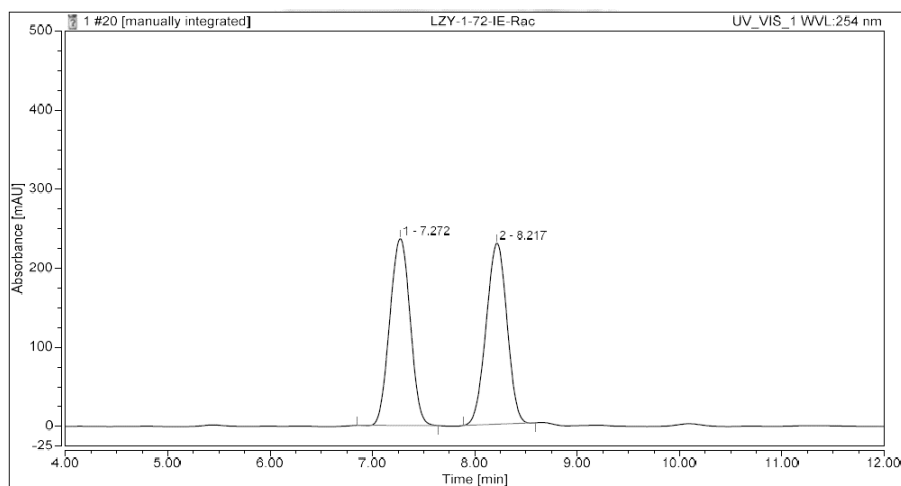

| Integration Results |           |                       |                 |               |                    |                      |                |
|---------------------|-----------|-----------------------|-----------------|---------------|--------------------|----------------------|----------------|
| No.                 | Peak Name | Retention Time<br>min | Area<br>mAU*min | Height<br>mAU | Relative Area<br>% | Relative Height<br>% | Amount<br>n.a. |
| 1                   |           | 7.272                 | 54.539          | 236.289       | 50.27              | 50.77                | n.a.           |
| 2                   |           | 8.217                 | 53.963          | 229.118       | 49.73              | 49.23                | n.a.           |
| Total:              |           |                       | 108.502         | 465.407       | 100.00             | 100.00               |                |

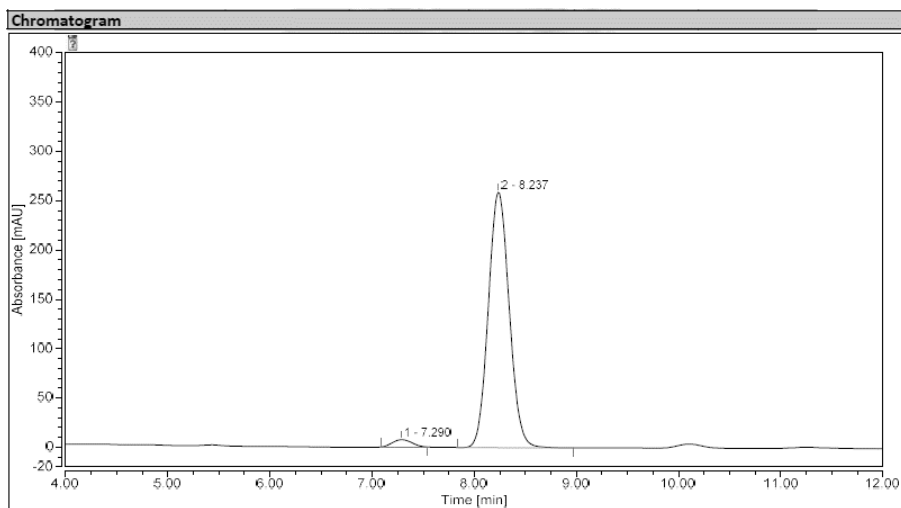

| Integration Results |           |                       |                 |               |                    |                      |                |
|---------------------|-----------|-----------------------|-----------------|---------------|--------------------|----------------------|----------------|
| No.                 | Peak Name | Retention Time<br>min | Area<br>mAU*min | Height<br>mAU | Relative Area<br>% | Relative Height<br>% | Amount<br>n.a. |
| 1                   |           | 7.290                 | 1.600           | 7.365         | 2.54               | 2.76                 | n.a.           |
| 2                   |           | 8.237                 | 61.383          | 259.033       | 97.46              | 97.24                | n.a.           |
| Total:              |           |                       | 62.984          | 266.398       | 100.00             | 100.00               |                |

Supplementary Figure 17. HPLC spectrum for compound (-)-2b

(+)-**1c**: **IE**, *i*-PrOH/hexane = 3/97,  $v = 1.0$  mL/min,  $\lambda = 254$  nm

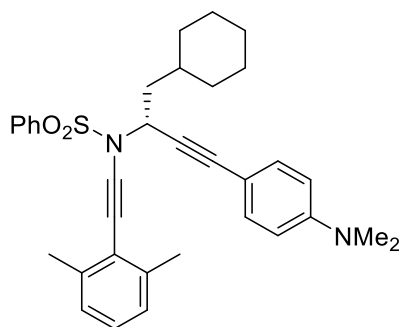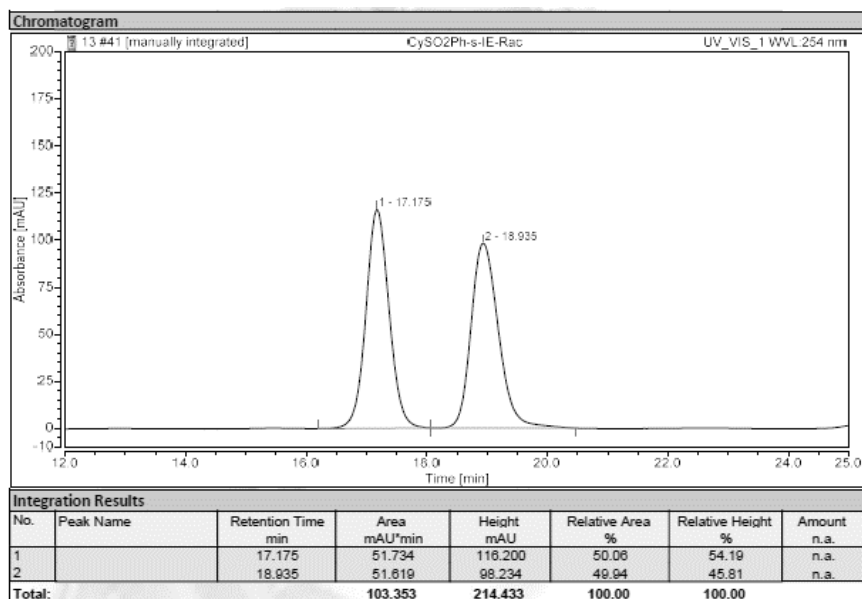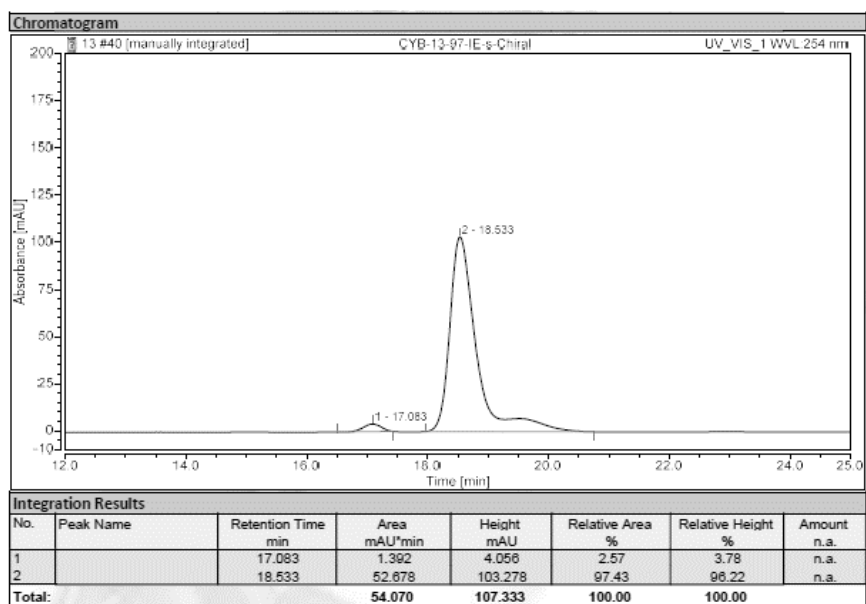

**Supplementary Figure 18.** HPLC spectrum for compound (+)-**1c**

(-)-2c: IE, *i*-PrOH/hexane = 5/95,  $v = 1.0$  mL/min,  $\lambda = 254$  nm

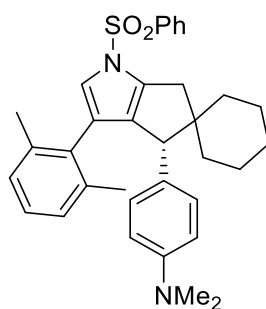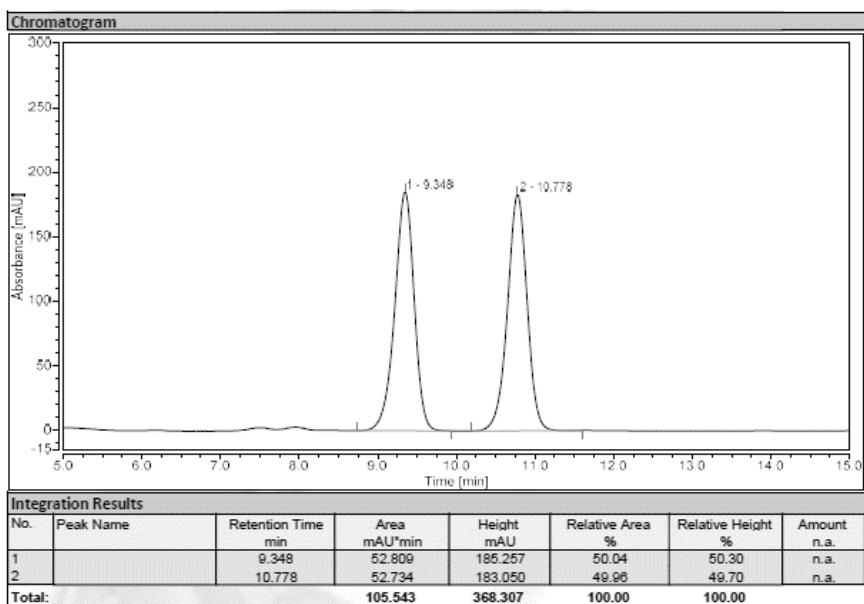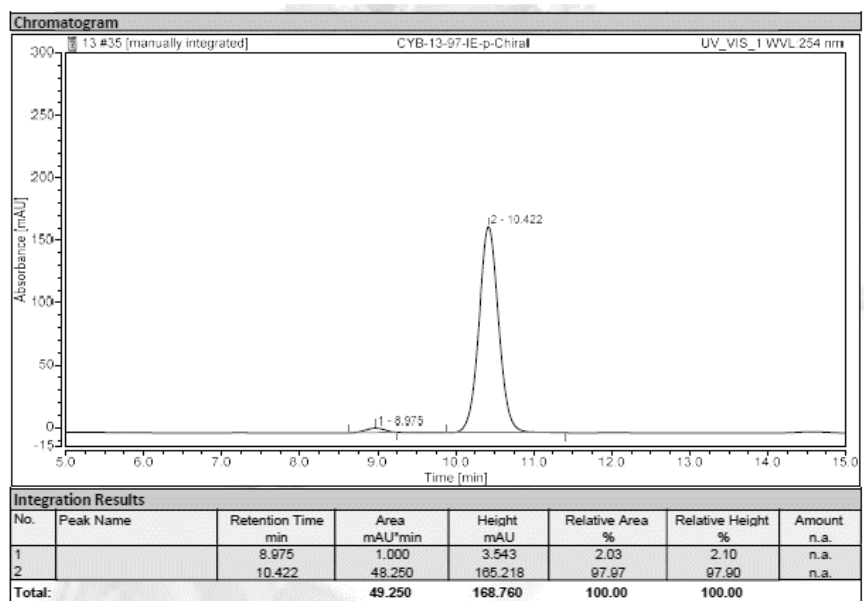

**Supplementary Figure 19.** HPLC spectrum for compound (-)-2c

(+)-**1d**: **IE**, *i*-PrOH/hexane = 5/95,  $v = 1.0$  mL/min,  $\lambda = 254$  nm

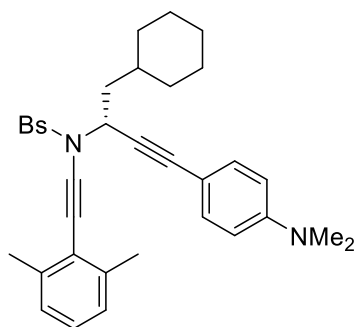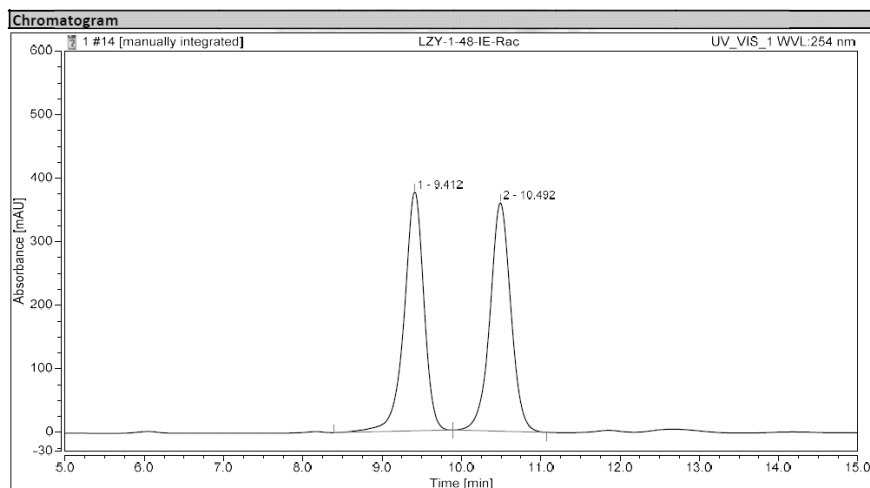

**Integration Results**

| No.           | Peak Name | Retention Time min | Area mAU*min   | Height mAU     | Relative Area % | Relative Height % | Amount n.a. |
|---------------|-----------|--------------------|----------------|----------------|-----------------|-------------------|-------------|
| 1             |           | 9.412              | 108.548        | 375.989        | 49.78           | 51.10             | n.a.        |
| 2             |           | 10.492             | 109.495        | 359.772        | 50.22           | 48.90             | n.a.        |
| <b>Total:</b> |           |                    | <b>218.043</b> | <b>735.762</b> | <b>100.00</b>   | <b>100.00</b>     |             |

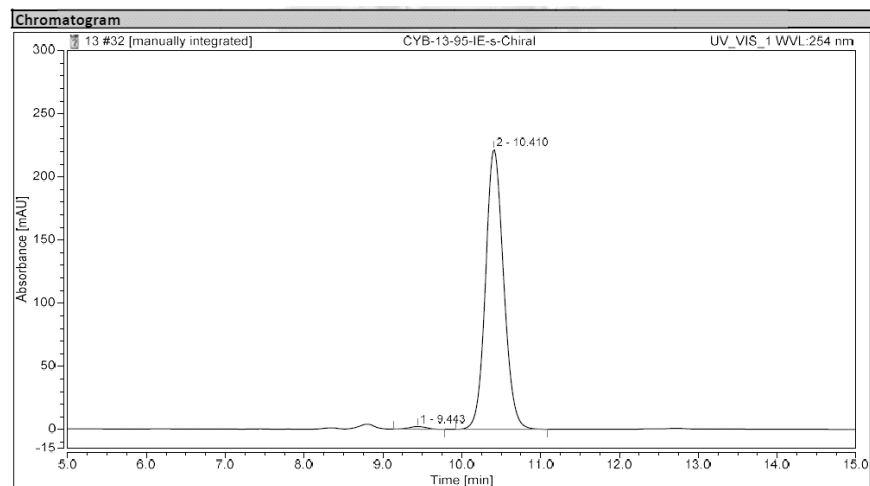

**Integration Results**

| No.           | Peak Name | Retention Time min | Area mAU*min  | Height mAU     | Relative Area % | Relative Height % | Amount n.a. |
|---------------|-----------|--------------------|---------------|----------------|-----------------|-------------------|-------------|
| 1             |           | 9.443              | 0.535         | 2.129          | 0.90            | 0.95              | n.a.        |
| 2             |           | 10.410             | 59.000        | 221.542        | 99.10           | 99.05             | n.a.        |
| <b>Total:</b> |           |                    | <b>59.535</b> | <b>223.671</b> | <b>100.00</b>   | <b>100.00</b>     |             |

**Supplementary Figure 20.** HPLC spectrum for compound (+)-**1d**



(-)-2d: IE, *i*-PrOH/hexane = 5/95,  $v = 1.0$  mL/min,  $\lambda = 254$  nm

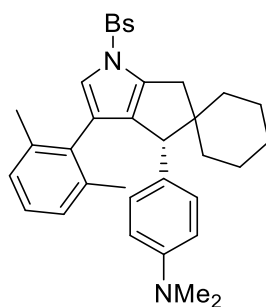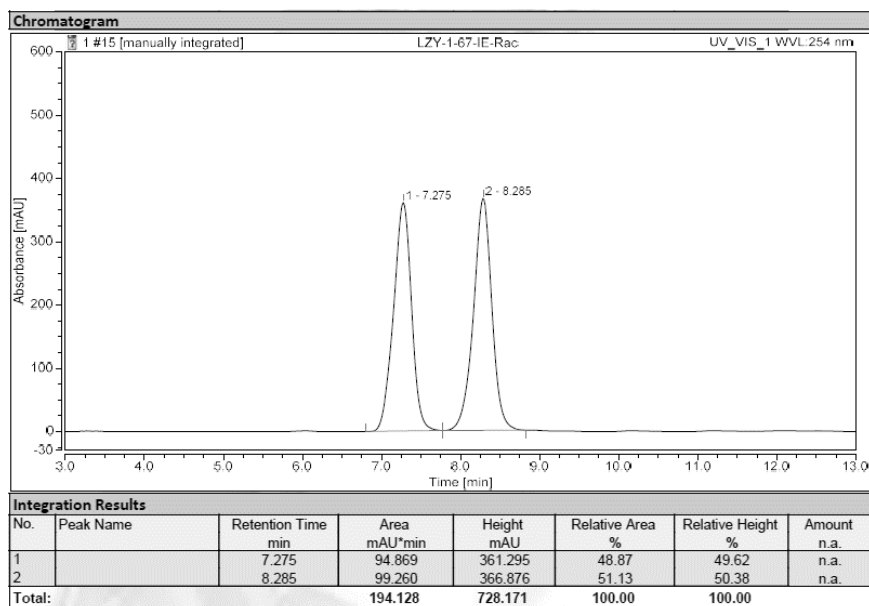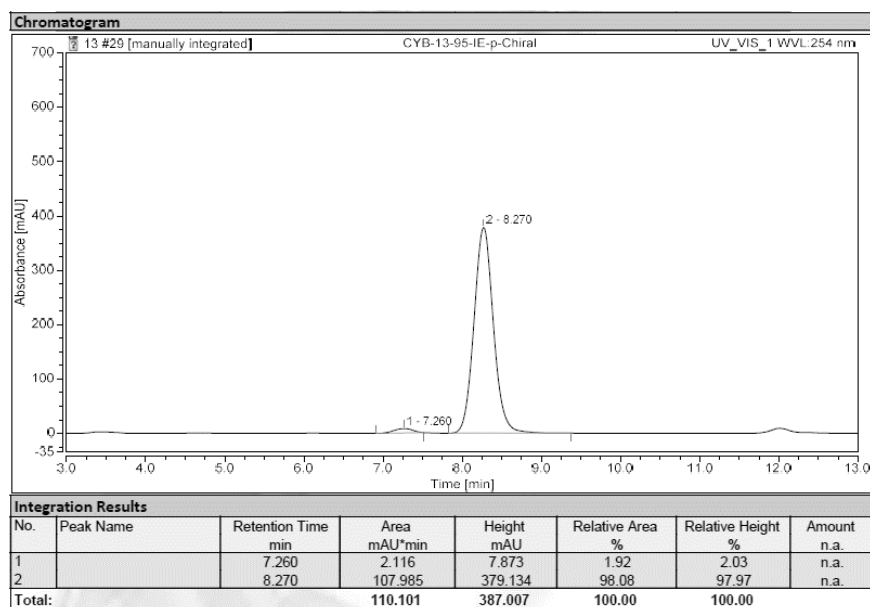

**Supplementary Figure 21.** HPLC spectrum for compound (-)-2d

(+)-**1e**: **IE**, *i*-PrOH/hexane = 5/95,  $v = 1.0$  mL/min,  $\lambda = 254$  nm

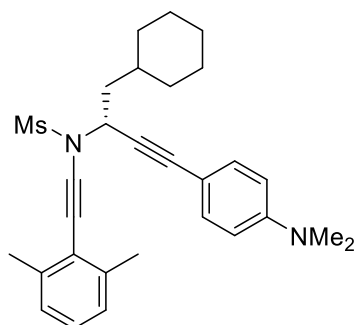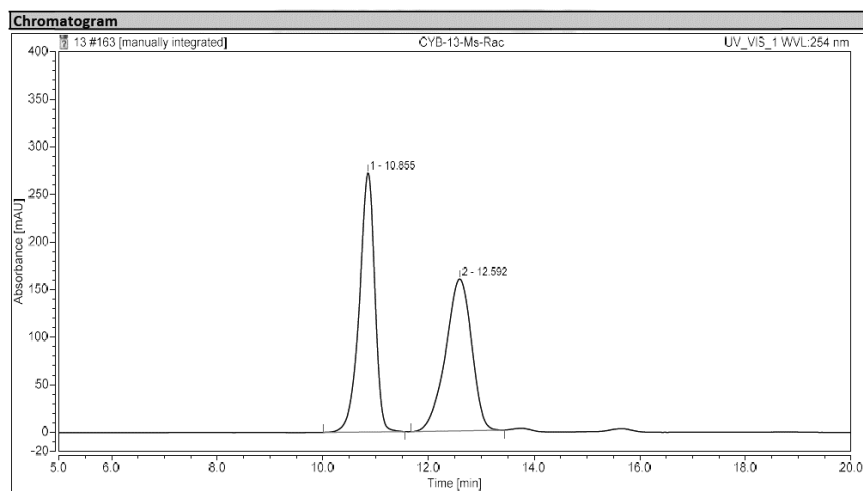

**Integration Results**

| No.           | Peak Name | Retention Time<br>min | Area<br>mAU*min | Height<br>mAU  | Relative Area<br>% | Relative Height<br>% | Amount |
|---------------|-----------|-----------------------|-----------------|----------------|--------------------|----------------------|--------|
| 1             |           | 10.855                | 92.395          | 272.624        | 50.39              | 63.07                | n.a.   |
| 2             |           | 12.592                | 90.971          | 159.632        | 49.61              | 36.93                | n.a.   |
| <b>Total:</b> |           |                       | <b>183.365</b>  | <b>432.256</b> | <b>100.00</b>      | <b>100.00</b>        |        |

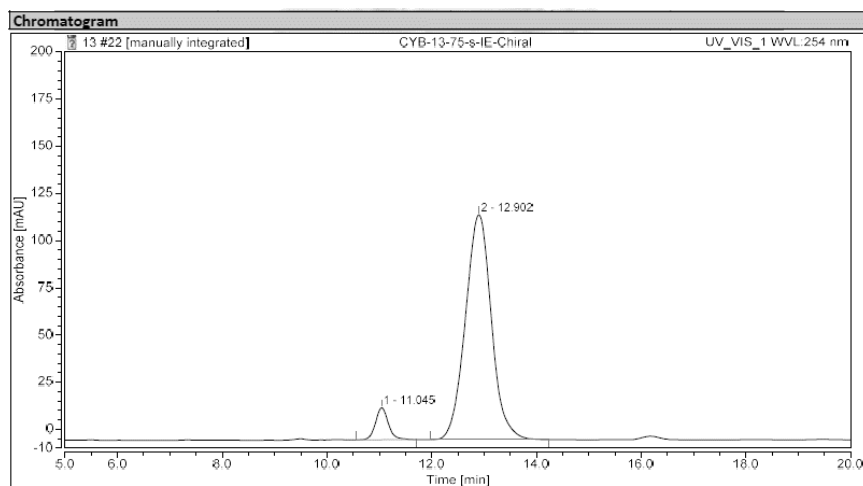

**Integration Results**

| No.           | Peak Name | Retention Time<br>min | Area<br>mAU*min | Height<br>mAU  | Relative Area<br>% | Relative Height<br>% | Amount |
|---------------|-----------|-----------------------|-----------------|----------------|--------------------|----------------------|--------|
| 1             |           | 11.045                | 4.804           | 16.985         | 6.56               | 12.47                | n.a.   |
| 2             |           | 12.902                | 68.415          | 119.168        | 93.44              | 87.53                | n.a.   |
| <b>Total:</b> |           |                       | <b>73.219</b>   | <b>136.153</b> | <b>100.00</b>      | <b>100.00</b>        |        |

**Supplementary Figure 22.** HPLC spectrum for compound (+)-**1e**

(-)-2e: ODH, *i*-PrOH/hexane = 5/95,  $v = 1.0$  mL/min,  $\lambda = 254$  nm

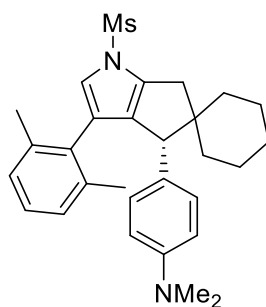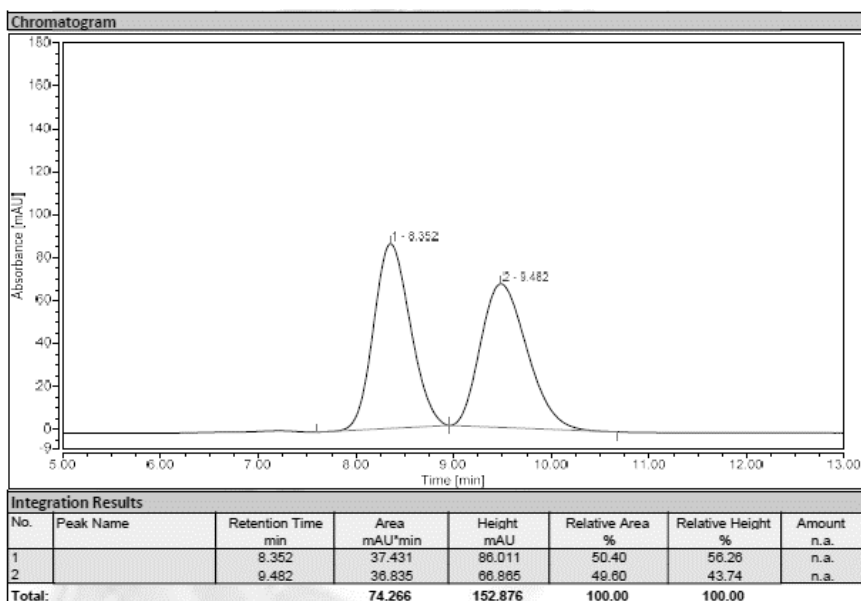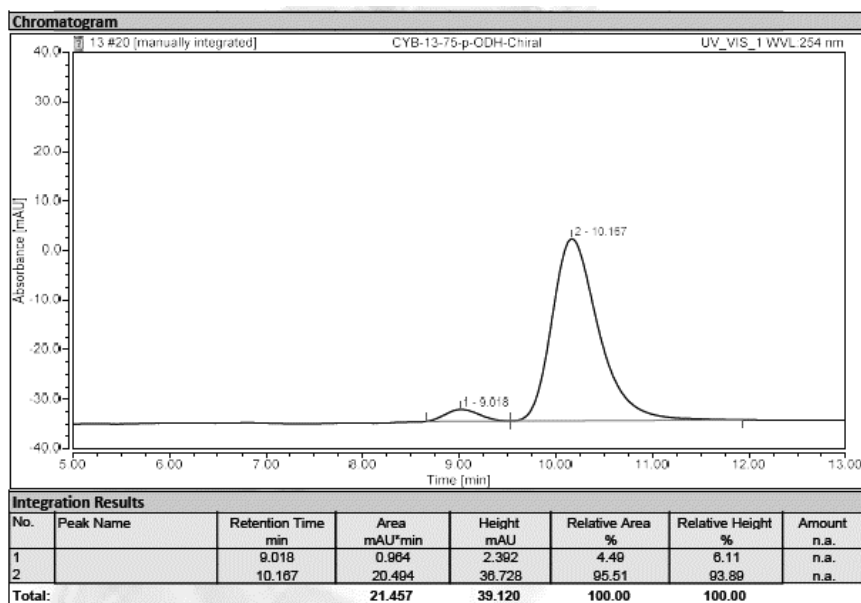

**Supplementary Figure 23.** HPLC spectrum for compound (-)-2e

(+)-**1f**: IE, *i*-PrOH/hexane = 30/70,  $v = 1.0$  mL/min,  $\lambda = 254$  nm

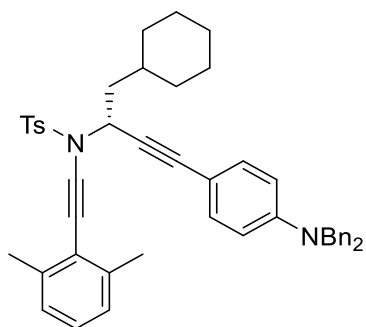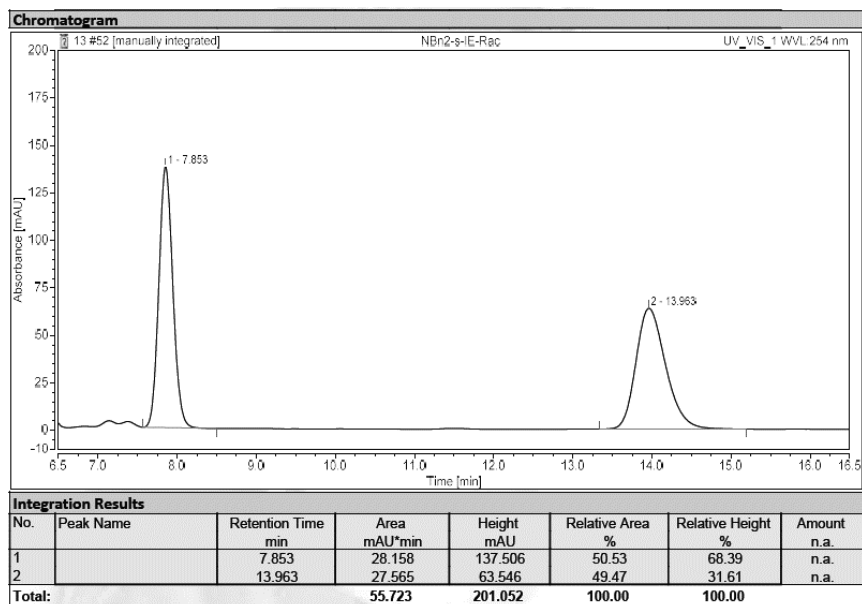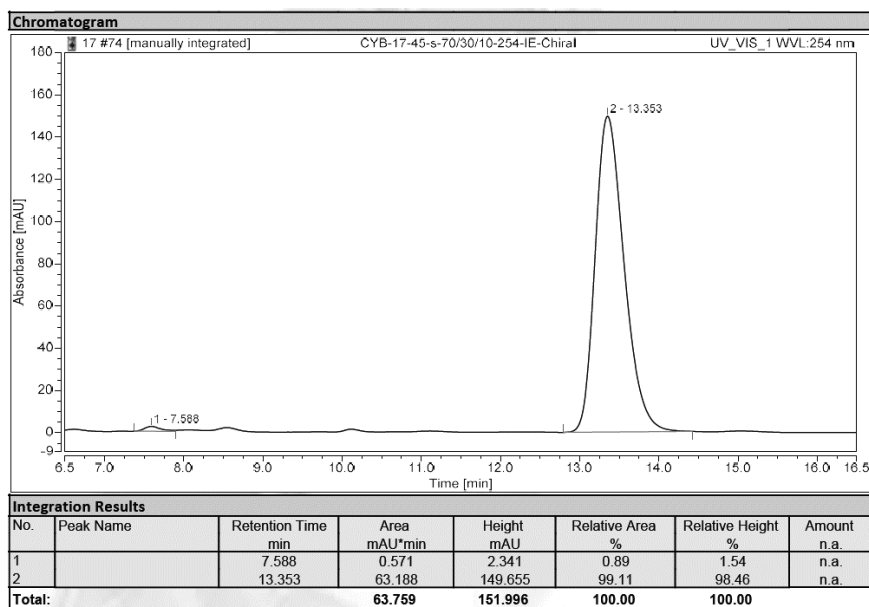

**Supplementary Figure 24.** HPLC spectrum for compound (+)-**1f**

(-)-2f: ODH, *i*-PrOH/hexane = 3/97,  $\nu$  = 1.0 mL/min,  $\lambda$  = 254 nm

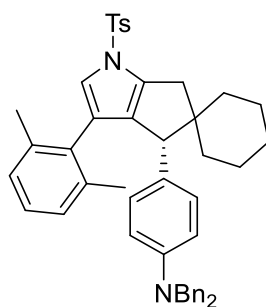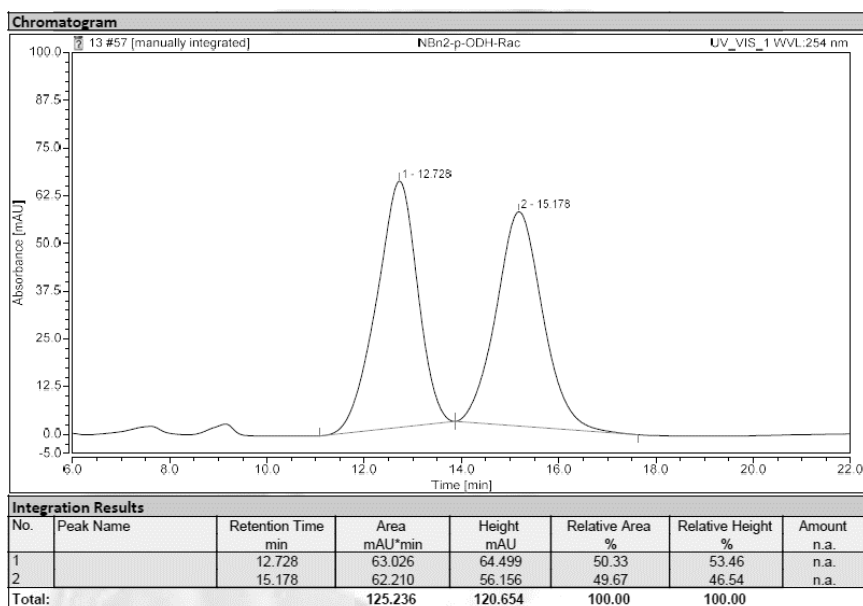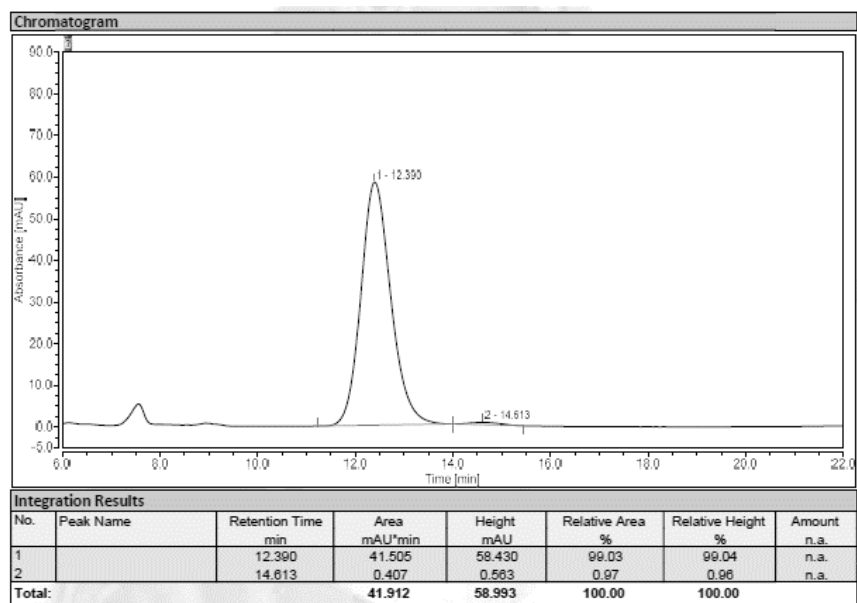

Supplementary Figure 25. HPLC spectrum for compound (-)-2f

(+)-**1g**: ADH, *i*-PrOH/hexane = 5/95,  $v = 1.0$  mL/min,  $\lambda = 254$  nm

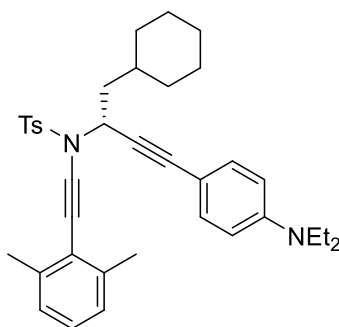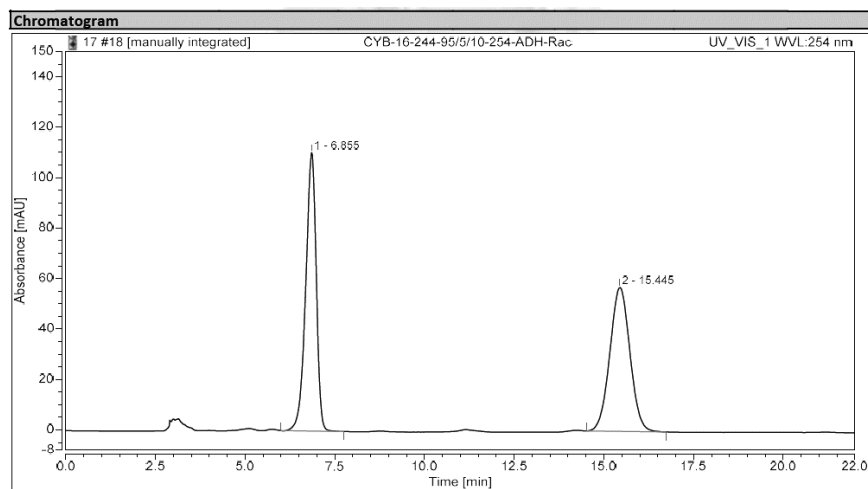

**Integration Results**

| No.           | Peak Name | Retention Time<br>min | Area<br>mAU*min | Height<br>mAU  | Relative Area<br>% | Relative Height<br>% | Amount<br>n.a. |
|---------------|-----------|-----------------------|-----------------|----------------|--------------------|----------------------|----------------|
| 1             |           | 6.855                 | 37.578          | 110.403        | 50.41              | 65.93                | n.a.           |
| 2             |           | 15.445                | 36.970          | 57.042         | 49.59              | 34.07                | n.a.           |
| <b>Total:</b> |           |                       | <b>74.547</b>   | <b>167.445</b> | <b>100.00</b>      | <b>100.00</b>        |                |

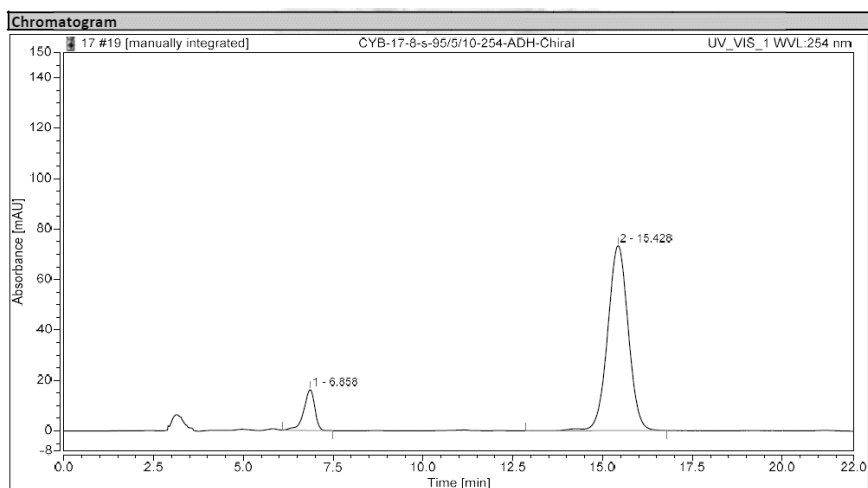

**Integration Results**

| No.           | Peak Name | Retention Time<br>min | Area<br>mAU*min | Height<br>mAU | Relative Area<br>% | Relative Height<br>% | Amount<br>n.a. |
|---------------|-----------|-----------------------|-----------------|---------------|--------------------|----------------------|----------------|
| 1             |           | 6.858                 | 5.766           | 16.236        | 10.58              | 18.12                | n.a.           |
| 2             |           | 15.428                | 48.717          | 73.350        | 89.42              | 81.88                | n.a.           |
| <b>Total:</b> |           |                       | <b>54.483</b>   | <b>89.586</b> | <b>100.00</b>      | <b>100.00</b>        |                |

**Supplementary Figure 26.** HPLC spectrum for compound (+)-**1g**

(-)-2g: IE, *i*-PrOH/hexane = 2/98,  $v = 1.0$  mL/min,  $\lambda = 254$  nm

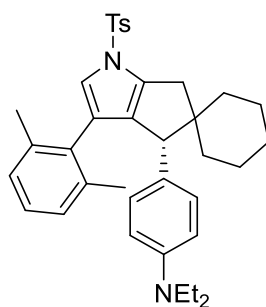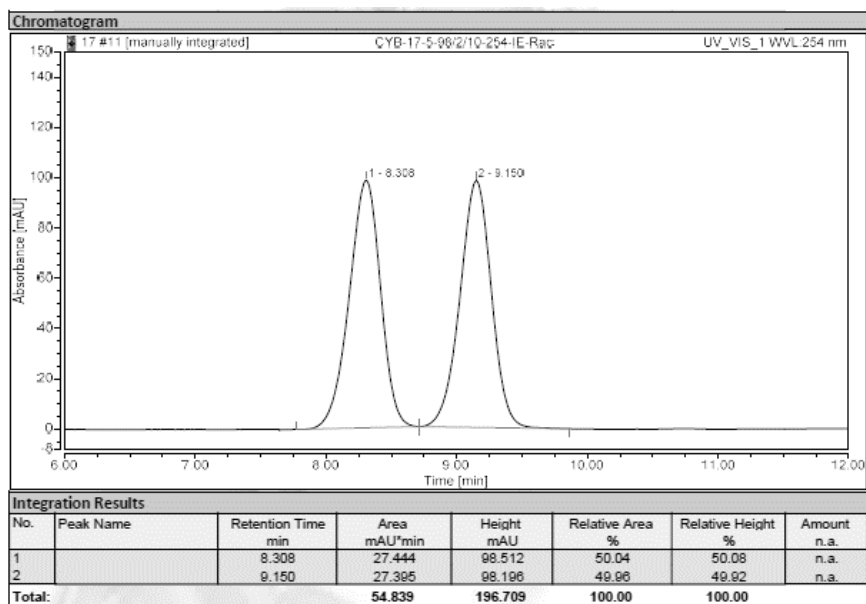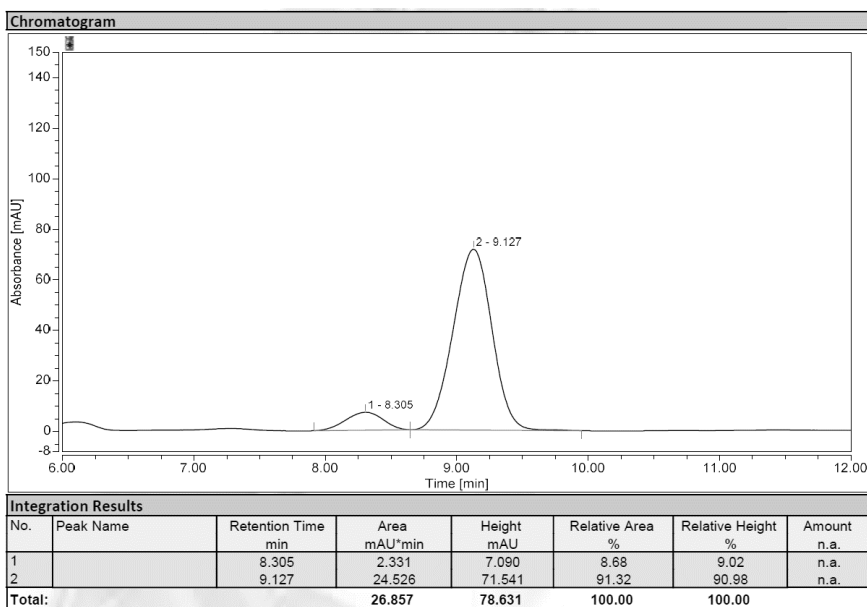

**Supplementary Figure 27.** HPLC spectrum for compound (-)-2g

(+)-**1h**: ADH, *i*-PrOH/hexane = 5/95,  $v = 1.0$  mL/min,  $\lambda = 254$  nm

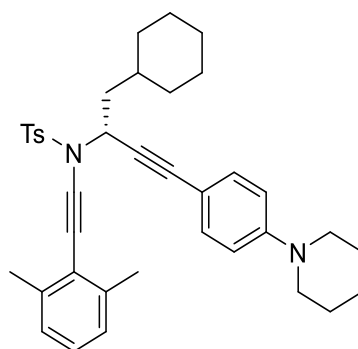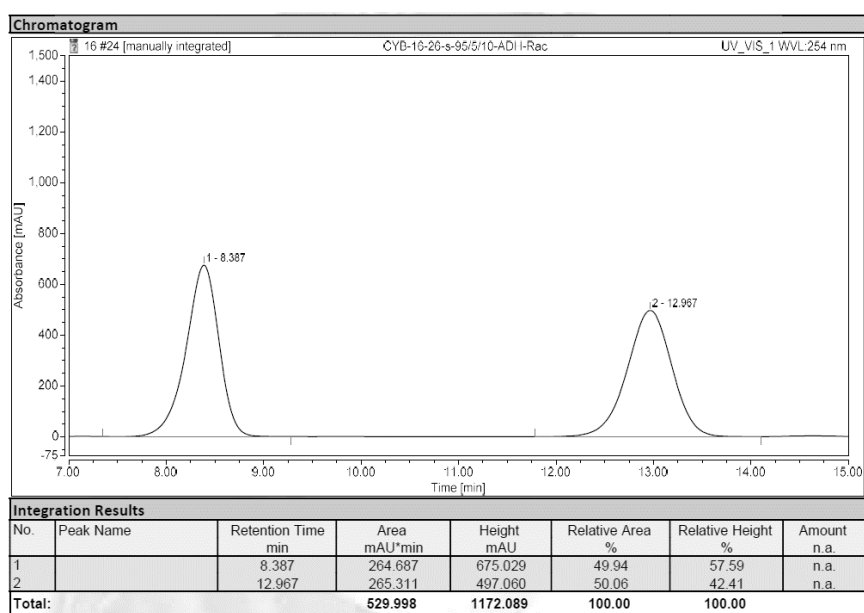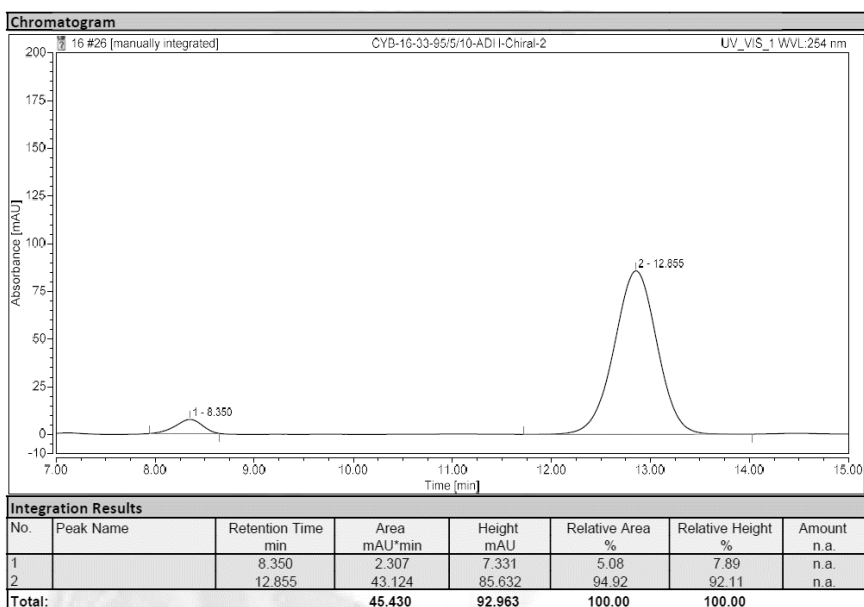

**Supplementary Figure 28.** HPLC spectrum for compound (+)-**1h**



(-)-2h: ADH, *i*-PrOH/hexane = 5/95,  $v = 1.0$  mL/min,  $\lambda = 254$  nm

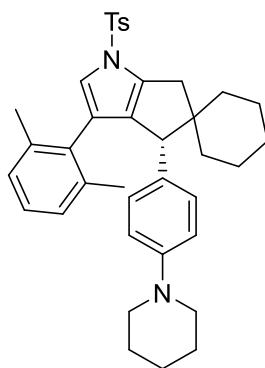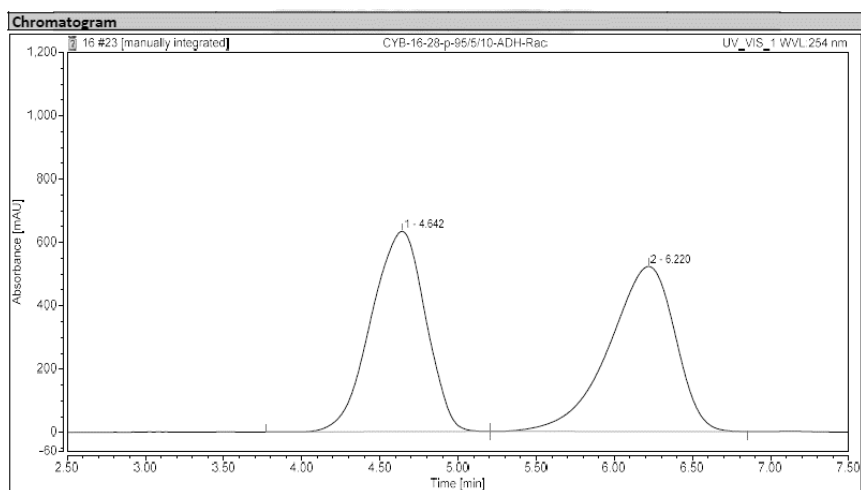

**Integration Results**

| No.           | Peak Name | Retention Time min | Area mAU*min   | Height mAU      | Relative Area % | Relative Height % | Amount |
|---------------|-----------|--------------------|----------------|-----------------|-----------------|-------------------|--------|
| 1             |           | 4.642              | 256.623        | 632.699         | 49.91           | 54.83             | n.a.   |
| 2             |           | 6.220              | 256.545        | 521.308         | 50.09           | 45.17             | n.a.   |
| <b>Total:</b> |           |                    | <b>512.168</b> | <b>1154.007</b> | <b>100.00</b>   | <b>100.00</b>     |        |

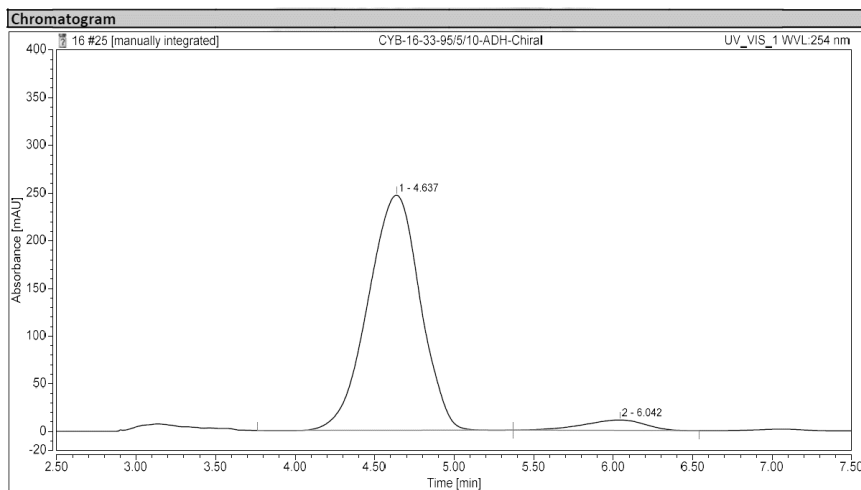

**Integration Results**

| No.           | Peak Name | Retention Time min | Area mAU*min  | Height mAU     | Relative Area % | Relative Height % | Amount |
|---------------|-----------|--------------------|---------------|----------------|-----------------|-------------------|--------|
| 1             |           | 4.637              | 93.570        | 248.495        | 95.04           | 95.75             | n.a.   |
| 2             |           | 6.042              | 4.879         | 10.954         | 4.96            | 4.25              | n.a.   |
| <b>Total:</b> |           |                    | <b>98.449</b> | <b>257.449</b> | <b>100.00</b>   | <b>100.00</b>     |        |

**Supplementary Figure 29.** HPLC spectrum for compound (-)-2h

(+)-**1i**: ADH, *i*-PrOH/hexane = 20/80,  $v = 1.0$  mL/min,  $\lambda = 254$  nm

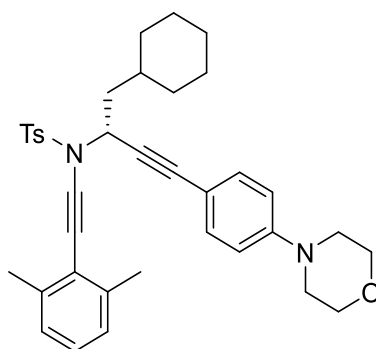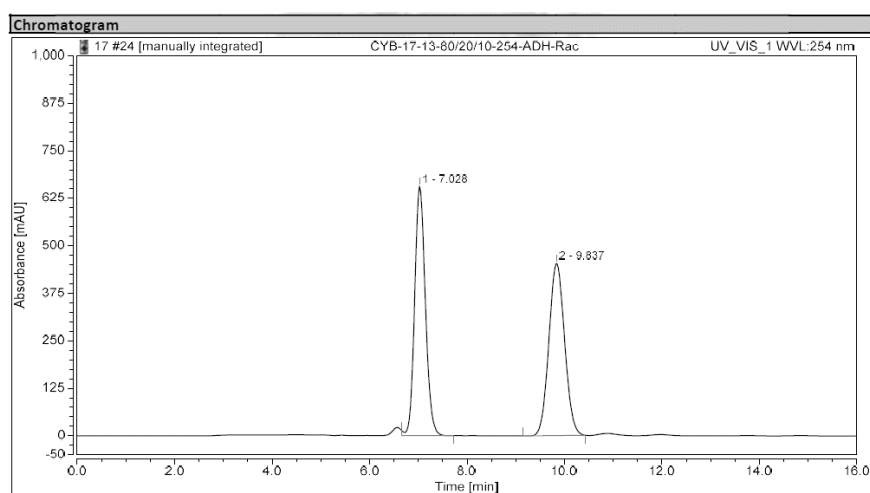

**Integration Results**

| No.           | Peak Name | Retention Time<br>min | Area<br>mAU*min | Height<br>mAU   | Relative Area<br>% | Relative Height<br>% | Amount<br>n.a. |
|---------------|-----------|-----------------------|-----------------|-----------------|--------------------|----------------------|----------------|
| 1             |           | 7.028                 | 167.051         | 656.326         | 49.64              | 59.14                | n.a.           |
| 2             |           | 9.837                 | 169.450         | 453.514         | 50.36              | 40.86                | n.a.           |
| <b>Total:</b> |           |                       | <b>336.501</b>  | <b>1109.841</b> | <b>100.00</b>      | <b>100.00</b>        |                |

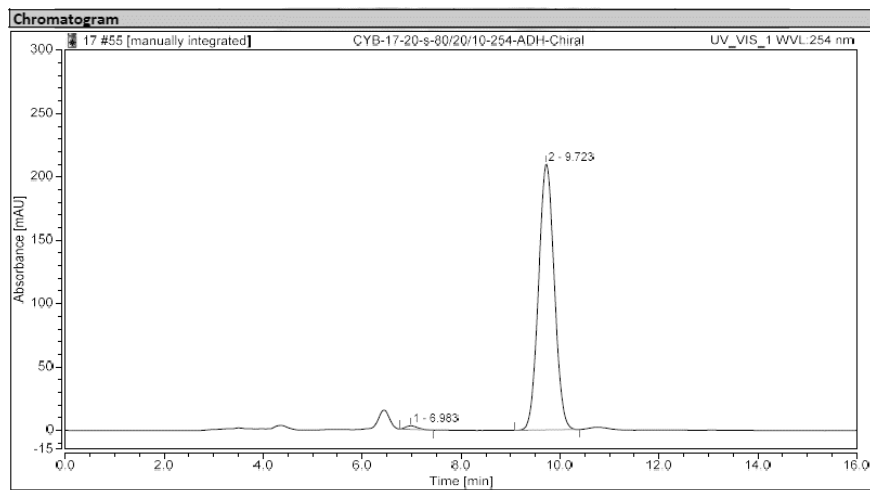

**Integration Results**

| No.           | Peak Name | Retention Time<br>min | Area<br>mAU*min | Height<br>mAU  | Relative Area<br>% | Relative Height<br>% | Amount<br>n.a. |
|---------------|-----------|-----------------------|-----------------|----------------|--------------------|----------------------|----------------|
| 1             |           | 6.983                 | 0.744           | 2.745          | 0.95               | 1.29                 | n.a.           |
| 2             |           | 9.723                 | 77.508          | 209.891        | 99.05              | 98.71                | n.a.           |
| <b>Total:</b> |           |                       | <b>78.252</b>   | <b>212.636</b> | <b>100.00</b>      | <b>100.00</b>        |                |

**Supplementary Figure 30.** HPLC spectrum for compound (+)-**1i**

(-)-2i: ADH, *i*-PrOH/hexane = 5/95,  $v = 1.0$  mL/min,  $\lambda = 254$  nm

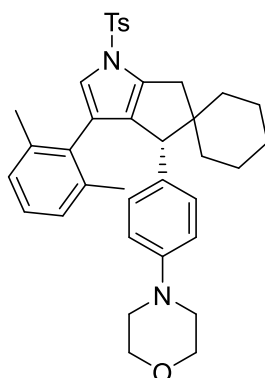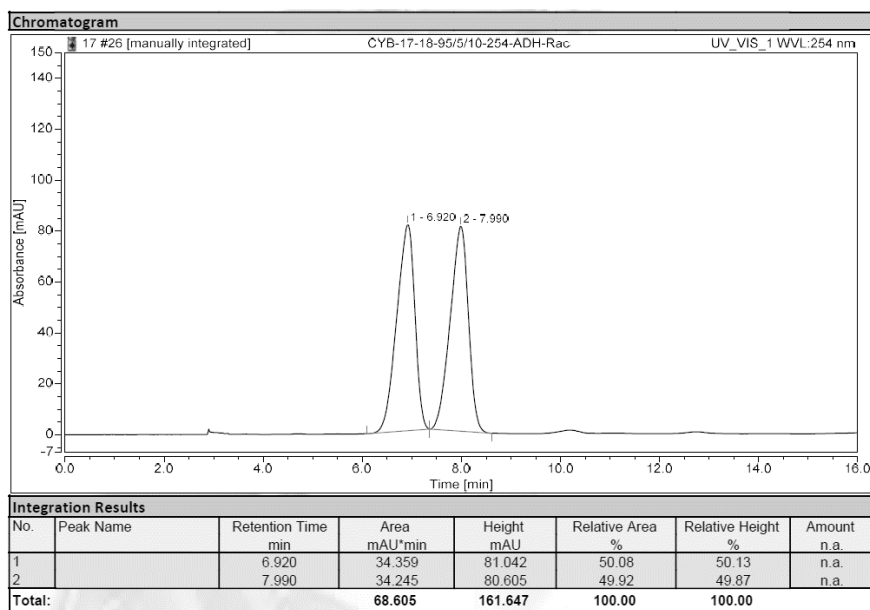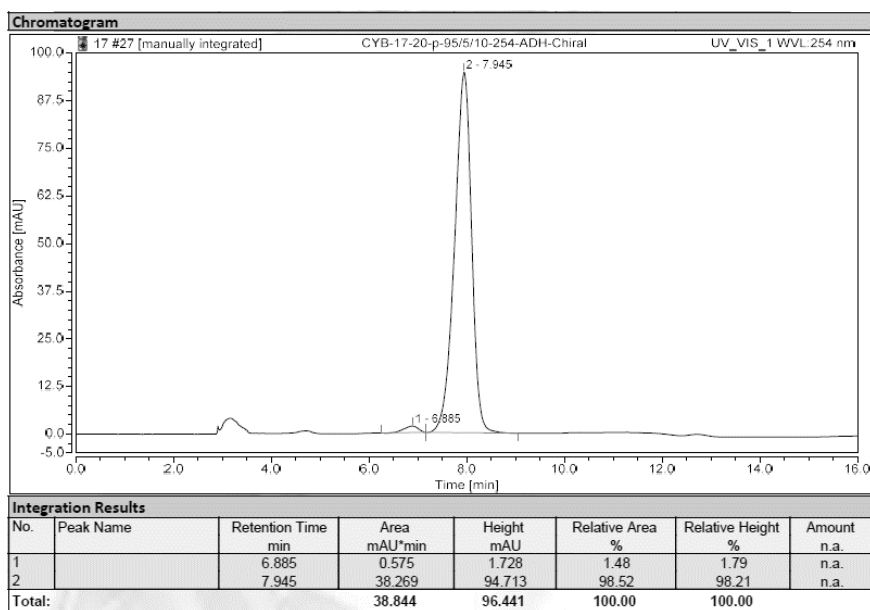

Supplementary Figure 31. HPLC spectrum for compound (-)-2i

(+)-**1j**: IE, *i*-PrOH/hexane = 10/90,  $\nu$  = 1.0 mL/min,  $\lambda$  = 254 nm

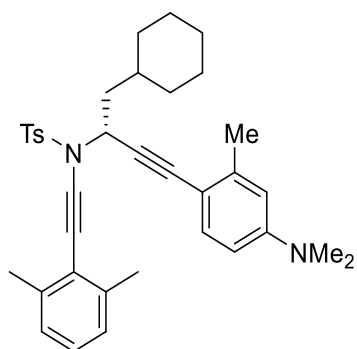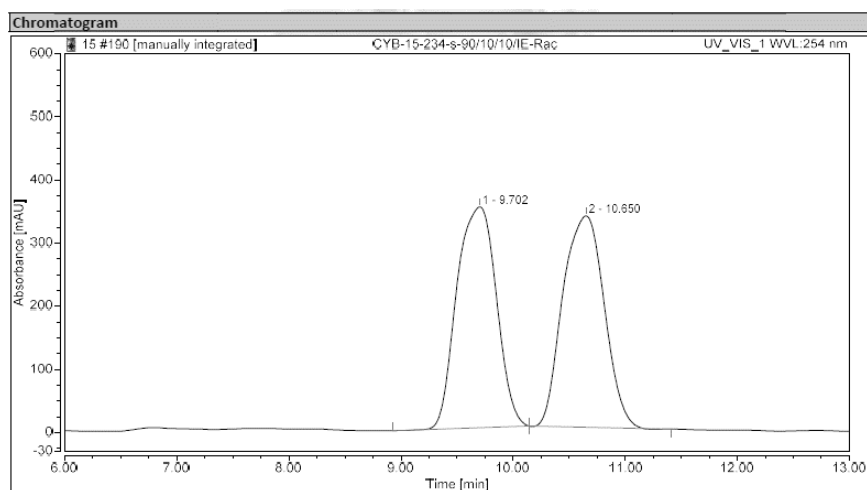

**Integration Results**

| No.           | Peak Name | Retention Time<br>min | Area<br>mAU*min | Height<br>mAU  | Relative Area<br>% | Relative Height<br>% | Amount<br>n.a. |
|---------------|-----------|-----------------------|-----------------|----------------|--------------------|----------------------|----------------|
| 1             |           | 9.702                 | 143.148         | 349.601        | 49.97              | 51.08                | n.a.           |
| 2             |           | 10.650                | 143.339         | 334.797        | 50.03              | 48.92                | n.a.           |
| <b>Total:</b> |           |                       | <b>286.487</b>  | <b>684.398</b> | <b>100.00</b>      | <b>100.00</b>        |                |

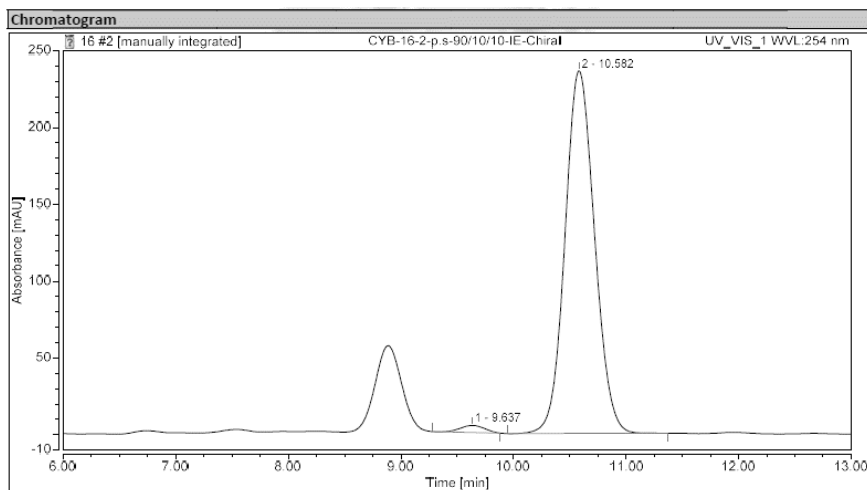

**Integration Results**

| No.           | Peak Name | Retention Time<br>min | Area<br>mAU*min | Height<br>mAU  | Relative Area<br>% | Relative Height<br>% | Amount<br>n.a. |
|---------------|-----------|-----------------------|-----------------|----------------|--------------------|----------------------|----------------|
| 1             |           | 9.637                 | 1.150           | 4.617          | 1.57               | 1.92                 | n.a.           |
| 2             |           | 10.582                | 72.036          | 236.232        | 98.43              | 98.08                | n.a.           |
| <b>Total:</b> |           |                       | <b>73.186</b>   | <b>240.850</b> | <b>100.00</b>      | <b>100.00</b>        |                |

**Supplementary Figure 32.** HPLC spectrum for compound (+)-**1j**

(-)-2j: **IE**, *i*-PrOH/hexane = 10/90,  $v = 1.0$  mL/min,  $\lambda = 254$  nm

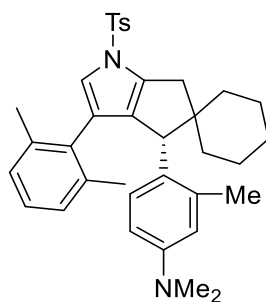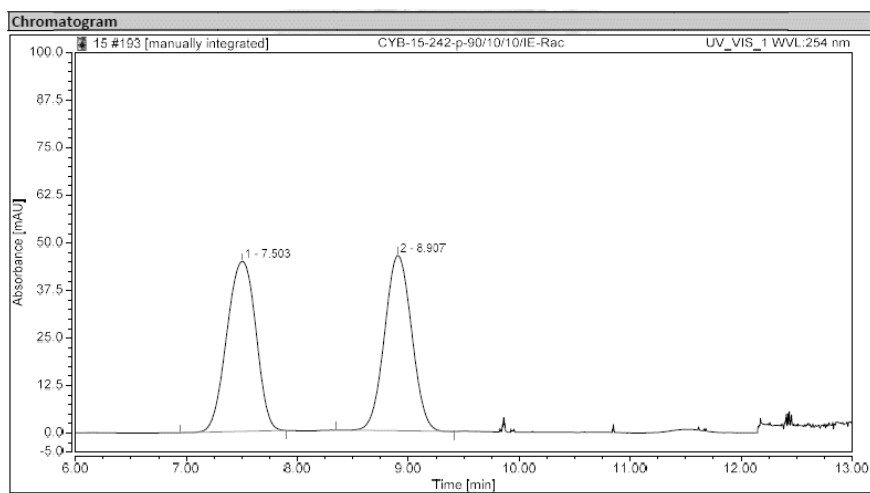

**Integration Results**

| No.           | Peak Name | Retention Time min | Area mAU*min  | Height mAU    | Relative Area % | Relative Height % | Amount |
|---------------|-----------|--------------------|---------------|---------------|-----------------|-------------------|--------|
| 1             |           | 7.503              | 13.590        | 44.721        | 51.05           | 49.25             | n.a.   |
| 2             |           | 8.907              | 13.031        | 46.087        | 48.95           | 50.75             | n.a.   |
| <b>Total:</b> |           |                    | <b>26.621</b> | <b>90.808</b> | <b>100.00</b>   | <b>100.00</b>     |        |

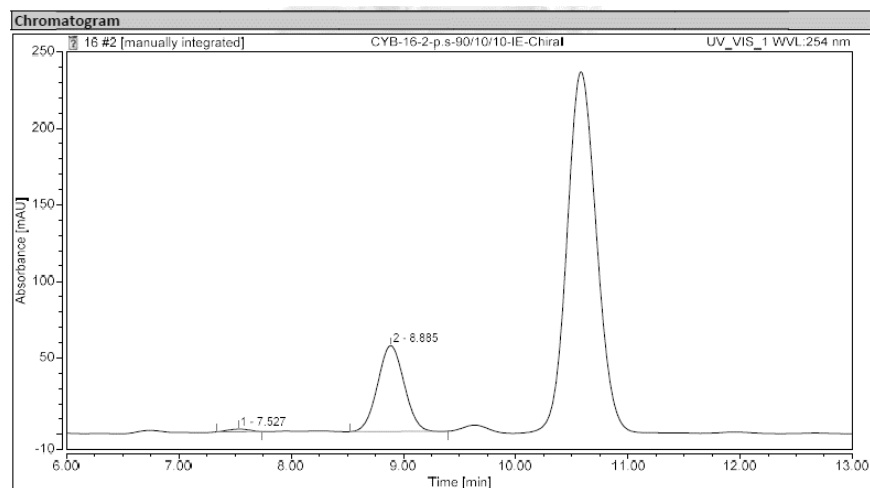

**Integration Results**

| No.           | Peak Name | Retention Time min | Area mAU*min  | Height mAU    | Relative Area % | Relative Height % | Amount |
|---------------|-----------|--------------------|---------------|---------------|-----------------|-------------------|--------|
| 1             |           | 7.527              | 0.386         | 1.752         | 2.45            | 3.03              | n.a.   |
| 2             |           | 8.885              | 15.342        | 56.079        | 97.55           | 96.97             | n.a.   |
| <b>Total:</b> |           |                    | <b>15.728</b> | <b>57.831</b> | <b>100.00</b>   | <b>100.00</b>     |        |

**Supplementary Figure 33.** HPLC spectrum for compound (-)-2j

(+)-**1k**: **IE**, *i*-PrOH/hexane = 5/95,  $v = 1.0$  mL/min,  $\lambda = 254$  nm

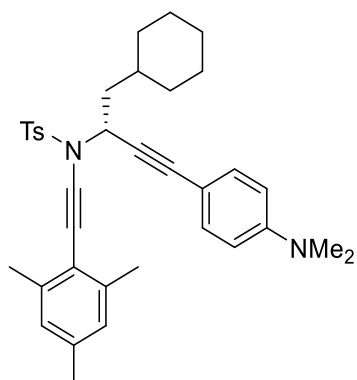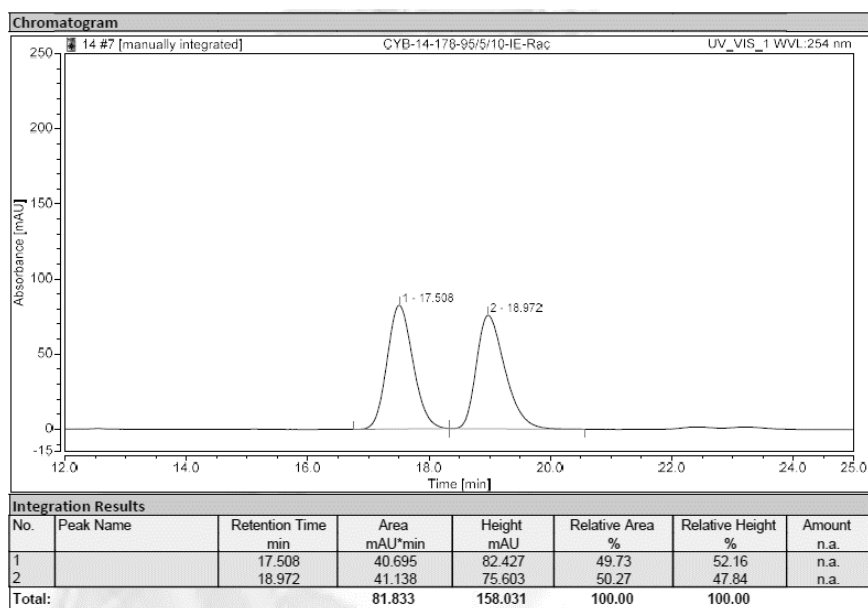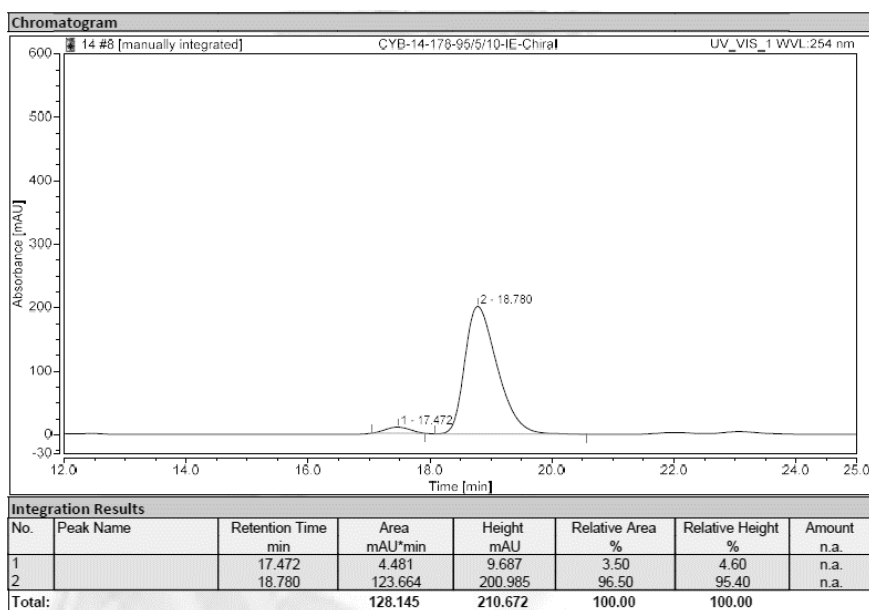

**Supplementary Figure 34.** HPLC spectrum for compound (+)-**1k**

(-)-2k: IE, *i*-PrOH/hexane = 5/95,  $v = 1.0$  mL/min,  $\lambda = 254$  nm

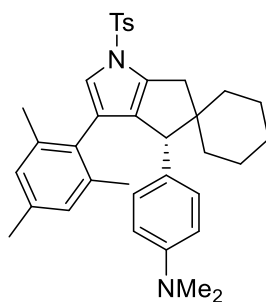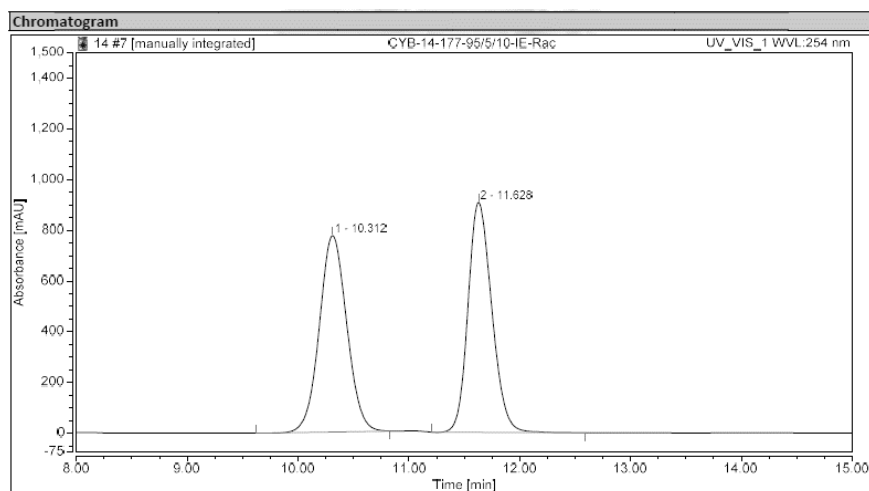

**Integration Results**

| No.           | Peak Name | Retention Time min | Area mAU*min   | Height mAU      | Relative Area % | Relative Height % | Amount |
|---------------|-----------|--------------------|----------------|-----------------|-----------------|-------------------|--------|
| 1             |           | 10.312             | 222.077        | 774.858         | 49.64           | 46.06             | n.a.   |
| 2             |           | 11.628             | 225.261        | 907.470         | 50.36           | 53.94             | n.a.   |
| <b>Total:</b> |           |                    | <b>447.338</b> | <b>1682.328</b> | <b>100.00</b>   | <b>100.00</b>     |        |

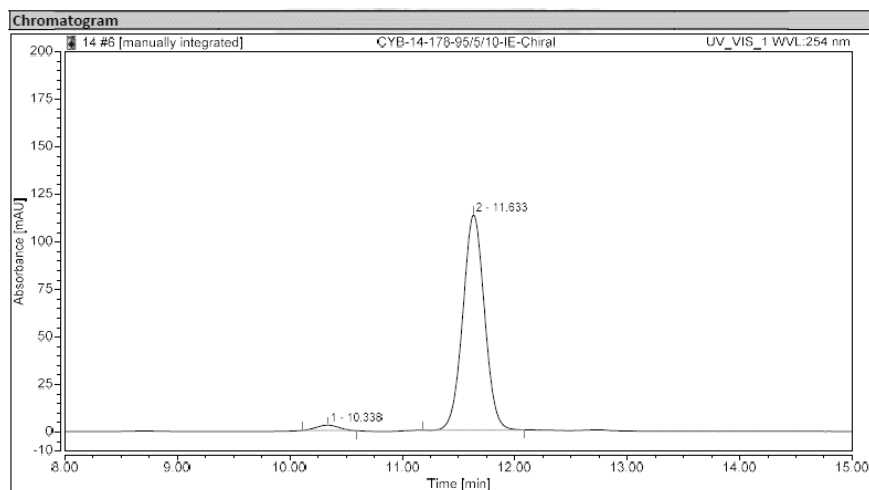

**Integration Results**

| No.           | Peak Name | Retention Time min | Area mAU*min  | Height mAU     | Relative Area % | Relative Height % | Amount |
|---------------|-----------|--------------------|---------------|----------------|-----------------|-------------------|--------|
| 1             |           | 10.338             | 0.660         | 2.839          | 2.54            | 2.45              | n.a.   |
| 2             |           | 11.633             | 25.307        | 113.200        | 97.46           | 97.55             | n.a.   |
| <b>Total:</b> |           |                    | <b>25.967</b> | <b>116.040</b> | <b>100.00</b>   | <b>100.00</b>     |        |

**Supplementary Figure 35.** HPLC spectrum for compound (-)-2k

(+)-**11**: **IE**, *i*-PrOH/hexane = 10/90,  $v = 1.0$  mL/min,  $\lambda = 254$  nm

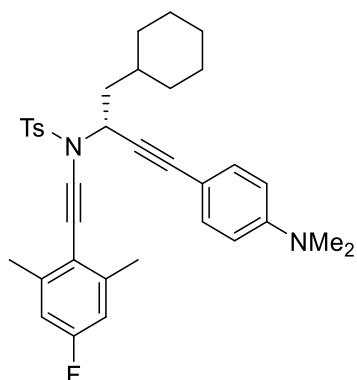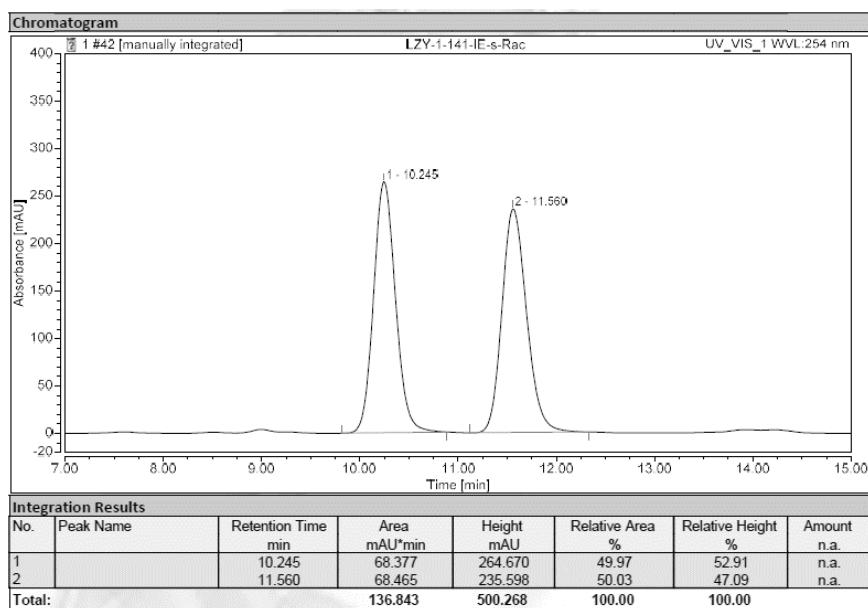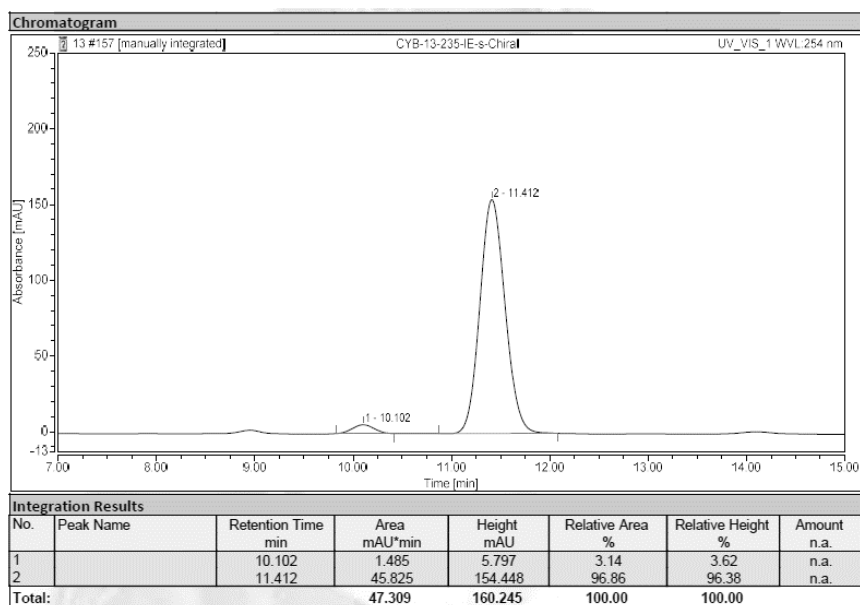

Supplementary Figure 36. HPLC spectrum for compound (+)-**11**



(-)-21: IE, *i*-PrOH/hexane = 5/95,  $v = 1.0$  mL/min,  $\lambda = 254$  nm

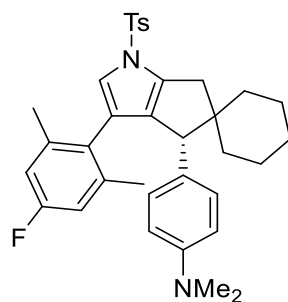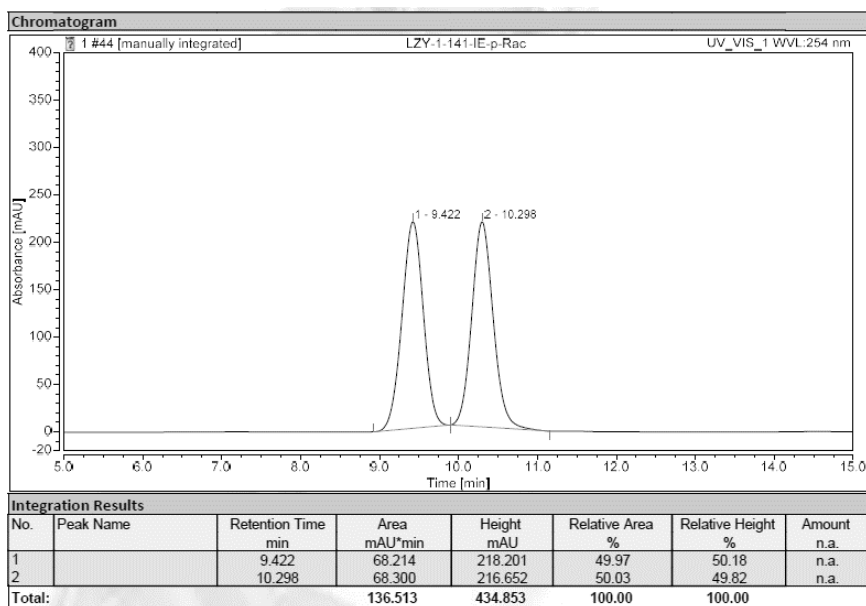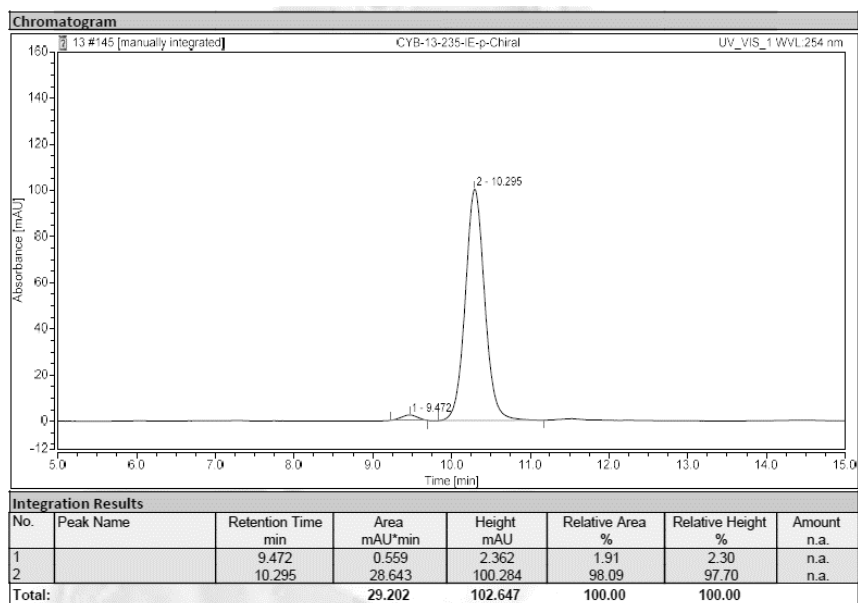

Supplementary Figure 37. HPLC spectrum for compound (-)-21

(+)-**1m**: ADH, *i*-PrOH/hexane = 5/95,  $v = 1.0$  mL/min,  $\lambda = 254$  nm

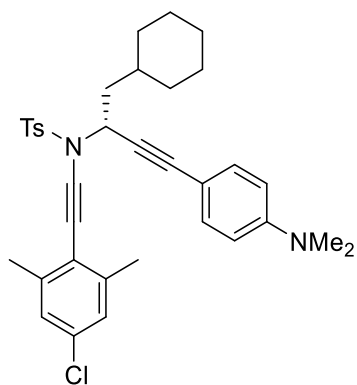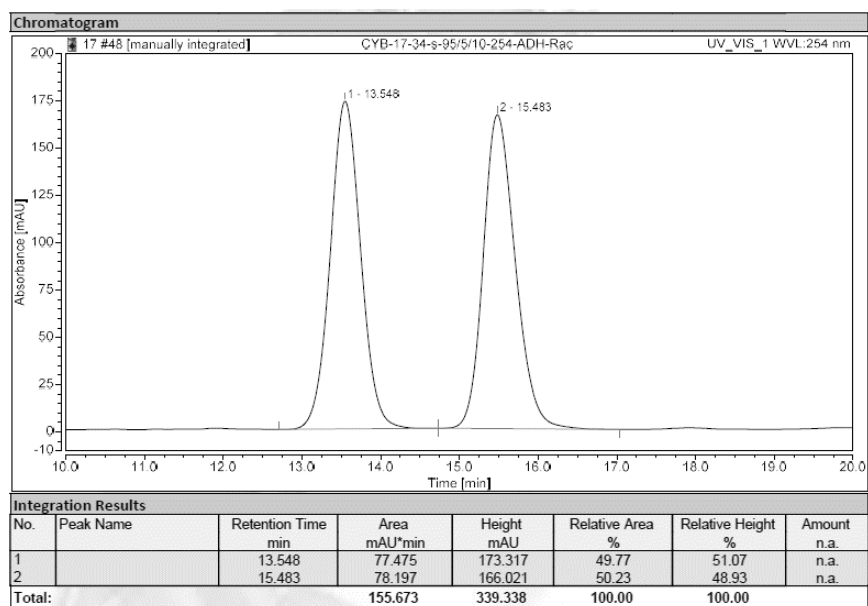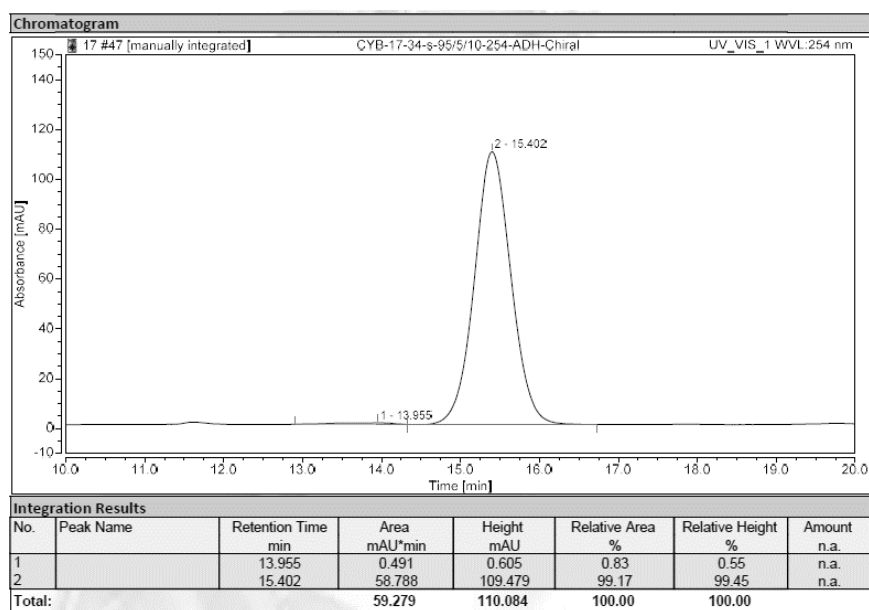

**Supplementary Figure 38.** HPLC spectrum for compound (+)-**1m**

(-)-2m: IE, *i*-PrOH/hexane = 5/95,  $v = 1.0$  mL/min,  $\lambda = 254$  nm

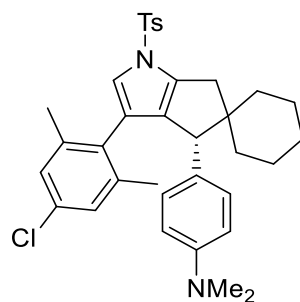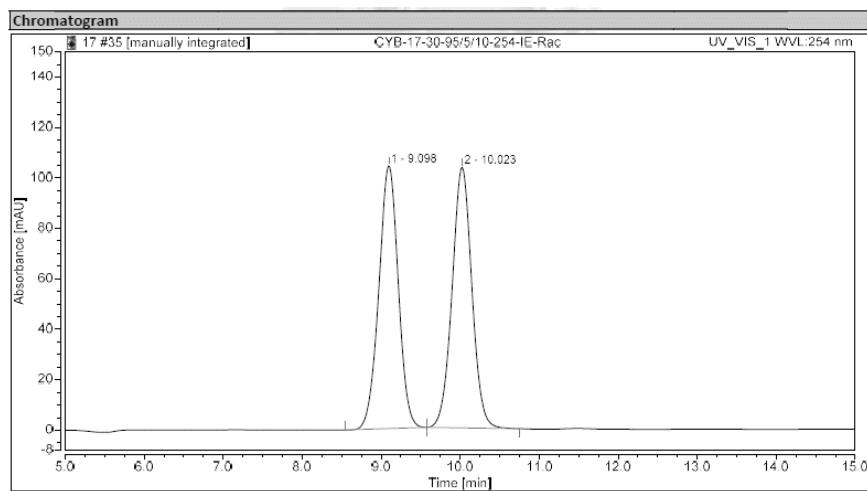

**Integration Results**

| No.           | Peak Name | Retention Time min | Area mAU*min  | Height mAU     | Relative Area % | Relative Height % | Amount |
|---------------|-----------|--------------------|---------------|----------------|-----------------|-------------------|--------|
| 1             |           | 9.098              | 29.743        | 104.225        | 49.97           | 50.21             | n.a.   |
| 2             |           | 10.023             | 29.781        | 103.343        | 50.03           | 49.79             | n.a.   |
| <b>Total:</b> |           |                    | <b>59.524</b> | <b>207.568</b> | <b>100.00</b>   | <b>100.00</b>     |        |

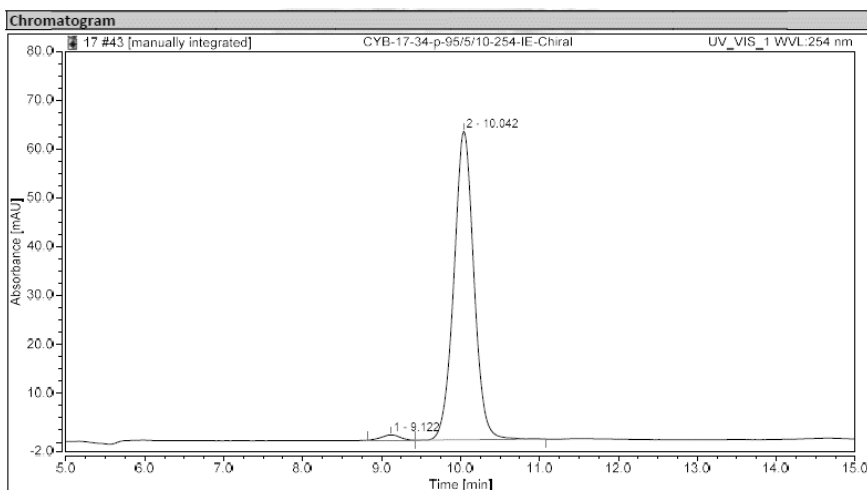

**Integration Results**

| No.           | Peak Name | Retention Time min | Area mAU*min  | Height mAU    | Relative Area % | Relative Height % | Amount |
|---------------|-----------|--------------------|---------------|---------------|-----------------|-------------------|--------|
| 1             |           | 9.122              | 0.292         | 1.102         | 1.55            | 1.71              | n.a.   |
| 2             |           | 10.042             | 18.579        | 63.264        | 98.45           | 98.29             | n.a.   |
| <b>Total:</b> |           |                    | <b>18.871</b> | <b>64.365</b> | <b>100.00</b>   | <b>100.00</b>     |        |

**Supplementary Figure 39.** HPLC spectrum for compound (-)-2m

(+)-**1n**: **IE**, *i*-PrOH/hexane = 10/90,  $v = 1.0$  mL/min,  $\lambda = 254$  nm

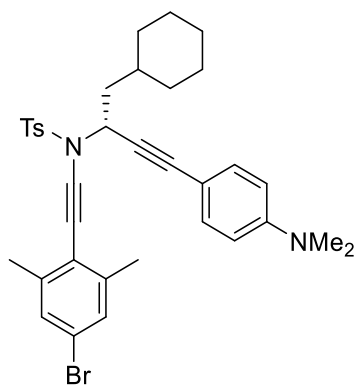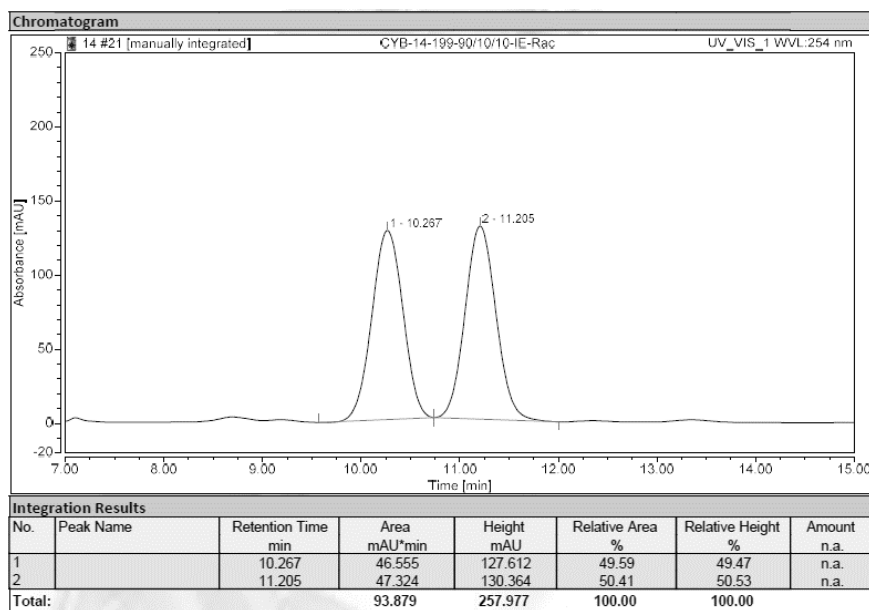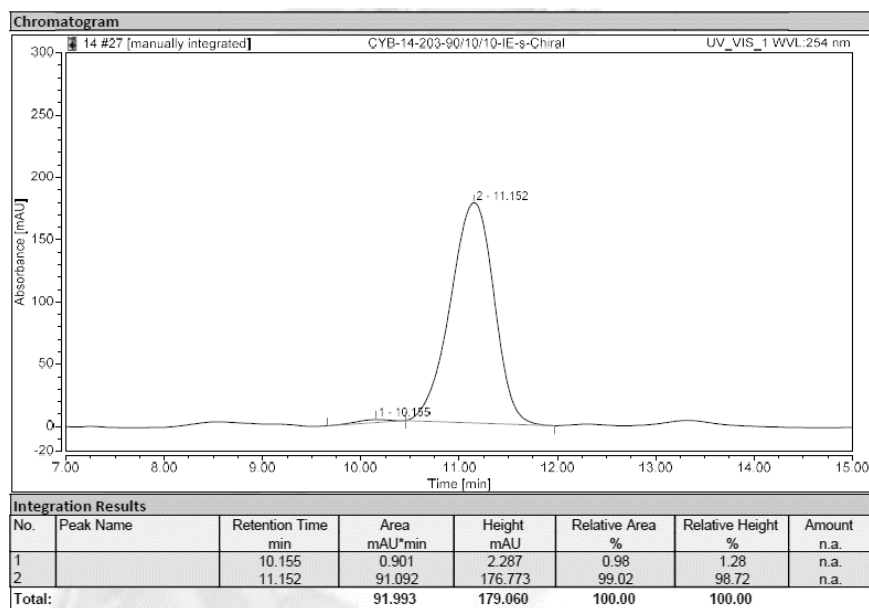

**Supplementary Figure 40.** HPLC spectrum for compound (+)-**1n**

(-)-2n: IC, *i*-PrOH/hexane = 5/95,  $v = 1.0$  mL/min,  $\lambda = 254$  nm

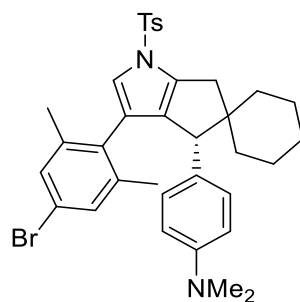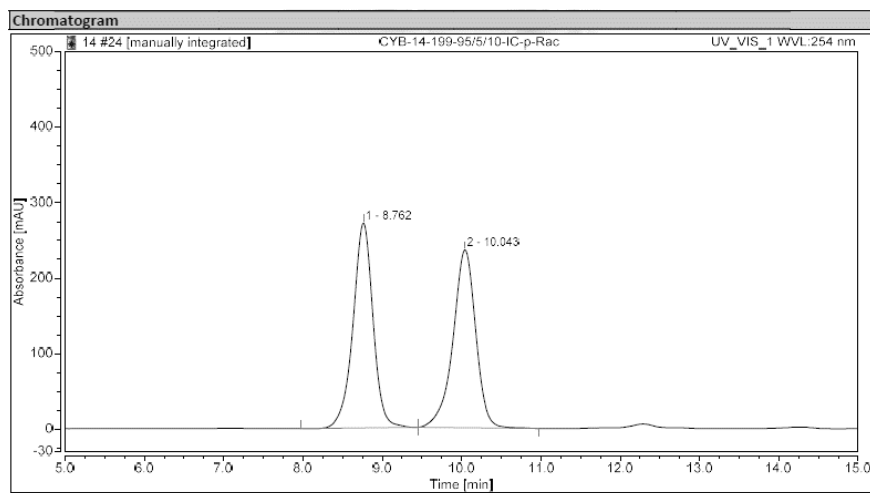

**Integration Results**

| No.    | Peak Name | Retention Time min | Area mAU*min | Height mAU | Relative Area % | Relative Height % | Amount n.a. |
|--------|-----------|--------------------|--------------|------------|-----------------|-------------------|-------------|
| 1      |           | 8.762              | 79.406       | 271.731    | 50.37           | 53.53             | n.a.        |
| 2      |           | 10.043             | 78.252       | 235.920    | 49.63           | 46.47             | n.a.        |
| Total: |           |                    | 157.658      | 507.651    | 100.00          | 100.00            |             |

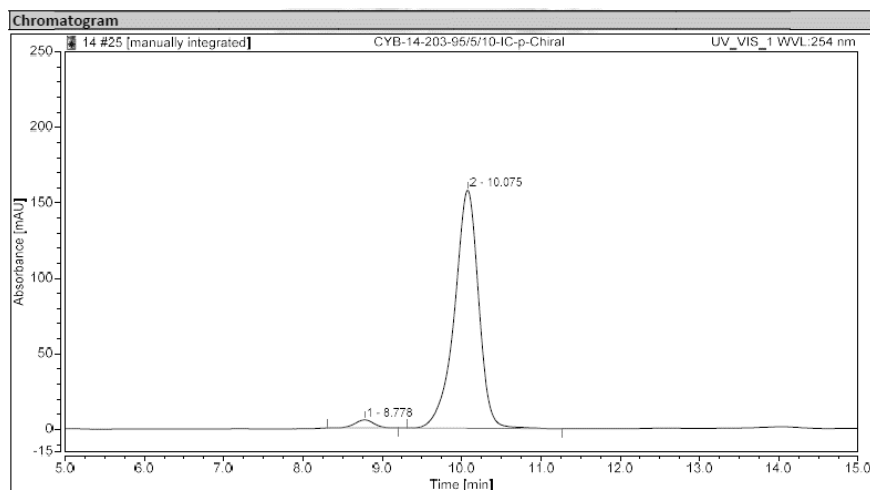

**Integration Results**

| No.    | Peak Name | Retention Time min | Area mAU*min | Height mAU | Relative Area % | Relative Height % | Amount n.a. |
|--------|-----------|--------------------|--------------|------------|-----------------|-------------------|-------------|
| 1      |           | 8.778              | 1.459        | 5.345      | 2.56            | 3.28              | n.a.        |
| 2      |           | 10.075             | 55.521       | 157.805    | 97.44           | 96.72             | n.a.        |
| Total: |           |                    | 56.980       | 163.150    | 100.00          | 100.00            |             |

**Supplementary Figure 41.** HPLC spectrum for compound (-)-2n

(+)-**1o**: ADH, *i*-PrOH/hexane = 10/90,  $v = 1.0$  mL/min,  $\lambda = 254$  nm

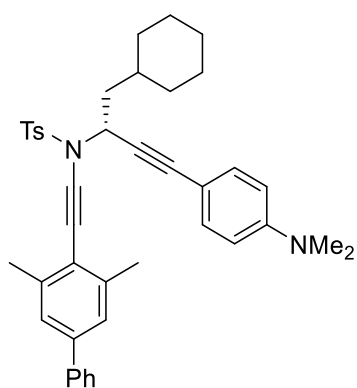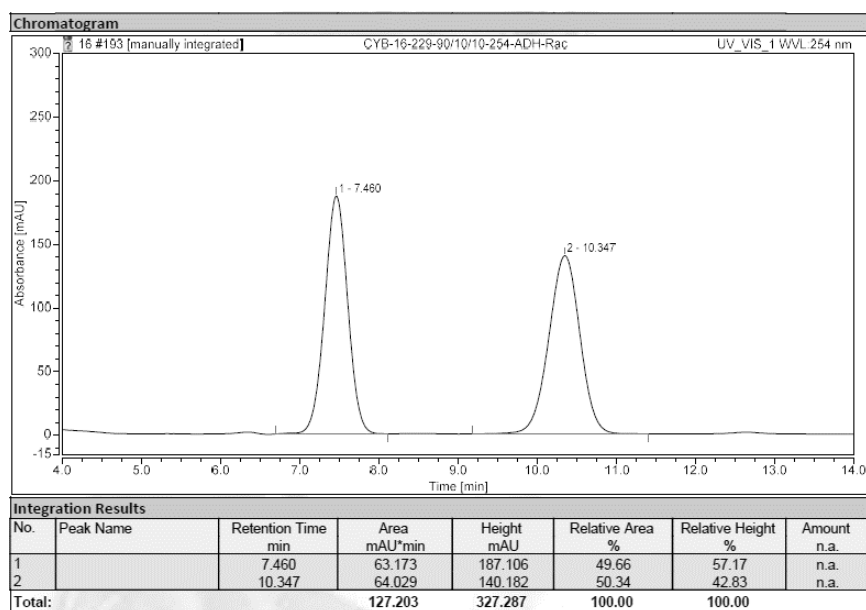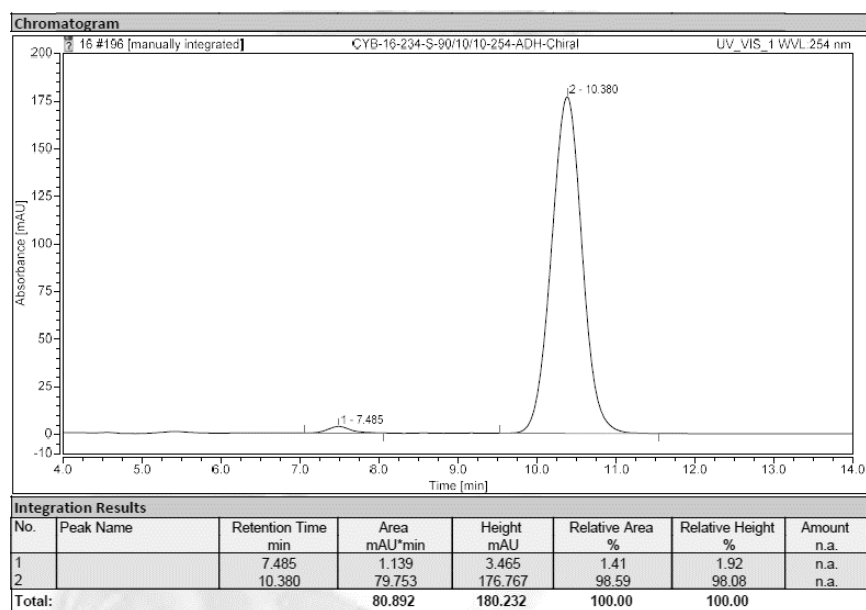

Supplementary Figure 42. HPLC spectrum for compound (+)-**1o**

(-)-2o: IC, *i*-PrOH/hexane = 5/95,  $v = 1.0$  mL/min,  $\lambda = 254$  nm

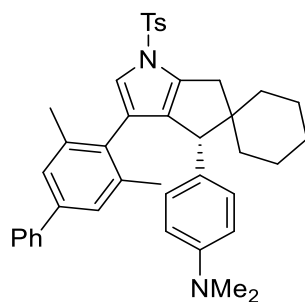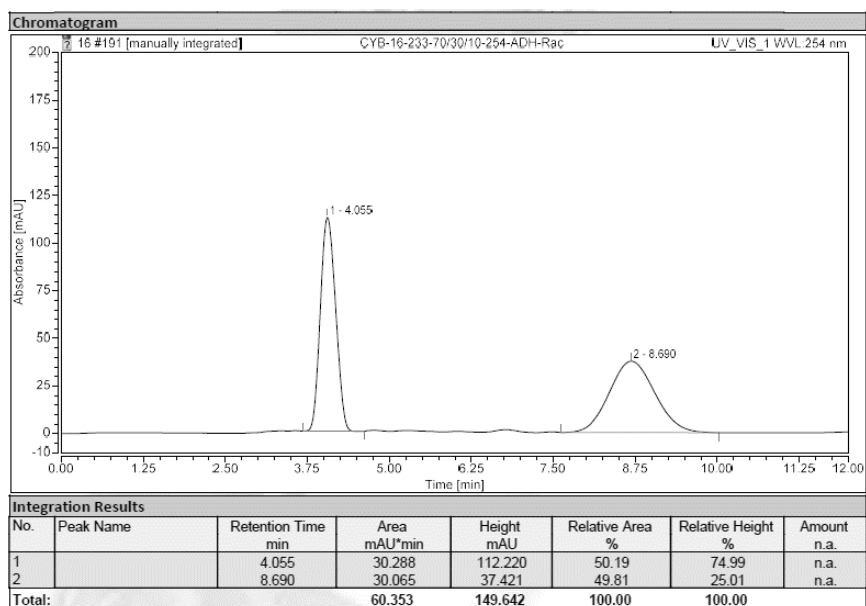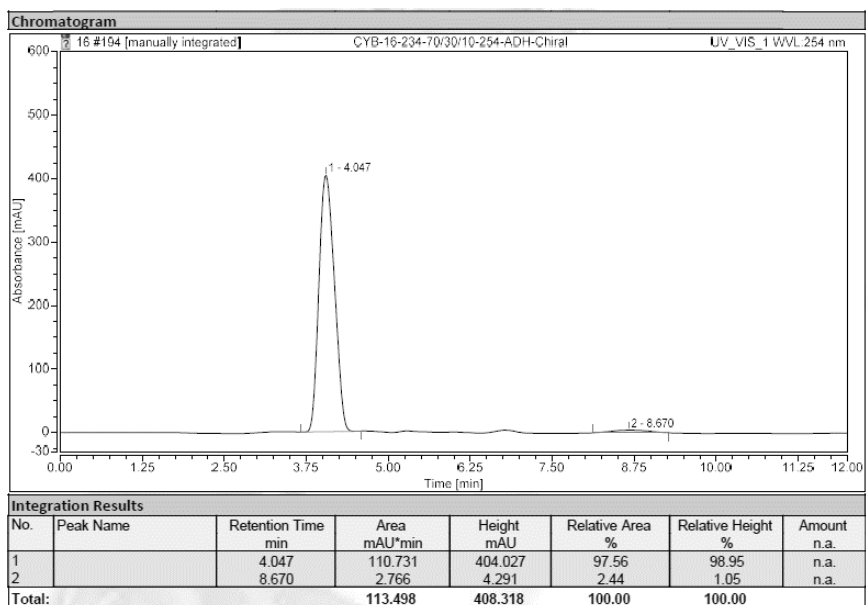

**Supplementary Figure 43.** HPLC spectrum for compound (-)-2o

(+)-**1p**: ADH, *i*-PrOH/hexane = 5/95,  $v = 1.0$  mL/min,  $\lambda = 254$  nm

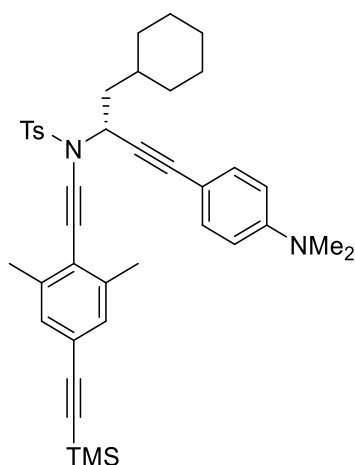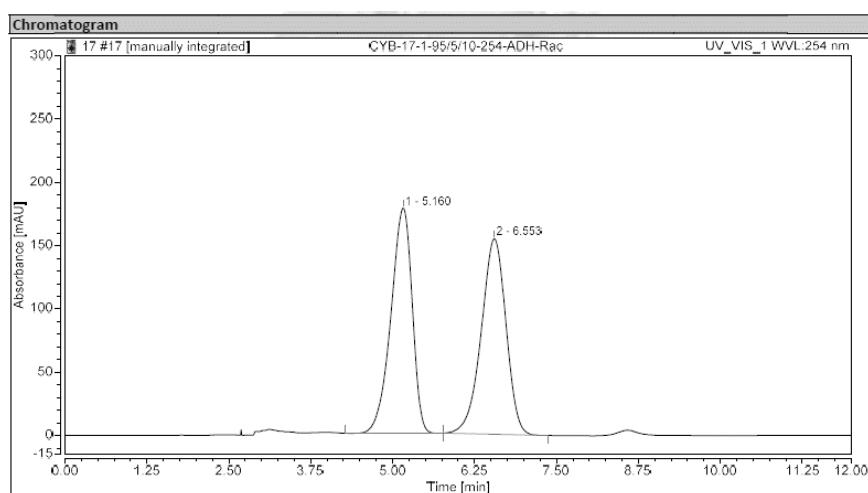

**Integration Results**

| No.           | Peak Name | Retention Time min | Area mAU*min   | Height mAU     | Relative Area % | Relative Height % | Amount |
|---------------|-----------|--------------------|----------------|----------------|-----------------|-------------------|--------|
| 1             |           | 5.160              | 66.899         | 178.065        | 49.69           | 53.52             | n.a.   |
| 2             |           | 6.553              | 67.726         | 154.626        | 50.31           | 46.48             | n.a.   |
| <b>Total:</b> |           |                    | <b>134.624</b> | <b>332.690</b> | <b>100.00</b>   | <b>100.00</b>     |        |

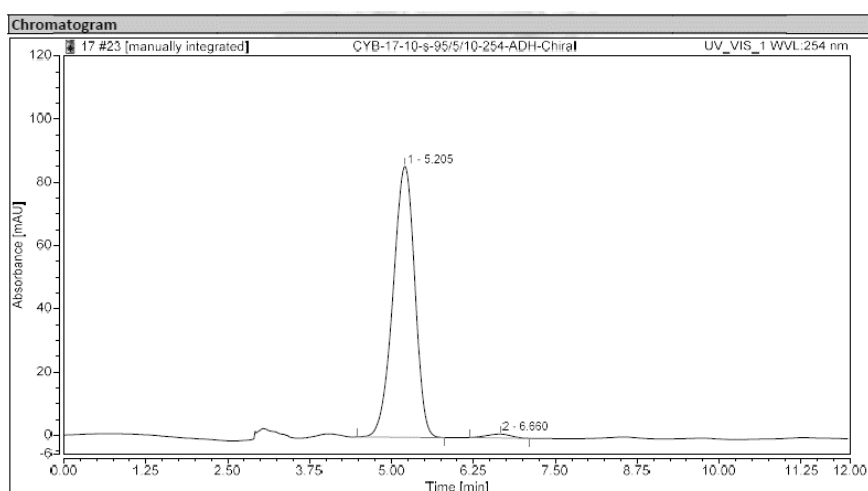

**Integration Results**

| No.           | Peak Name | Retention Time min | Area mAU*min  | Height mAU    | Relative Area % | Relative Height % | Amount |
|---------------|-----------|--------------------|---------------|---------------|-----------------|-------------------|--------|
| 1             |           | 5.205              | 32.964        | 85.705        | 98.47           | 98.60             | n.a.   |
| 2             |           | 6.660              | 0.511         | 1.221         | 1.53            | 1.40              | n.a.   |
| <b>Total:</b> |           |                    | <b>33.475</b> | <b>86.926</b> | <b>100.00</b>   | <b>100.00</b>     |        |

**Supplementary Figure 44.** HPLC spectrum for compound (+)-**1p**



(-)-2p: ADH, *i*-PrOH/hexane = 5/95,  $v = 1.0$  mL/min,  $\lambda = 254$  nm

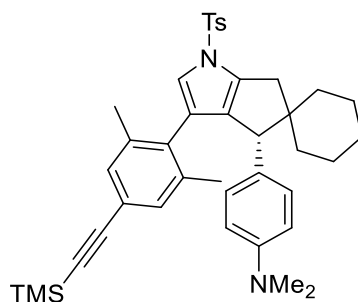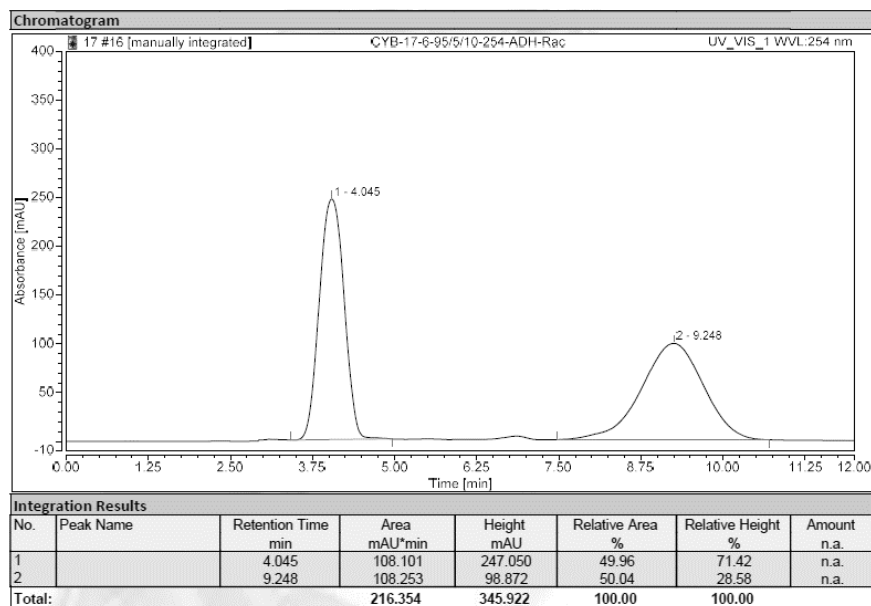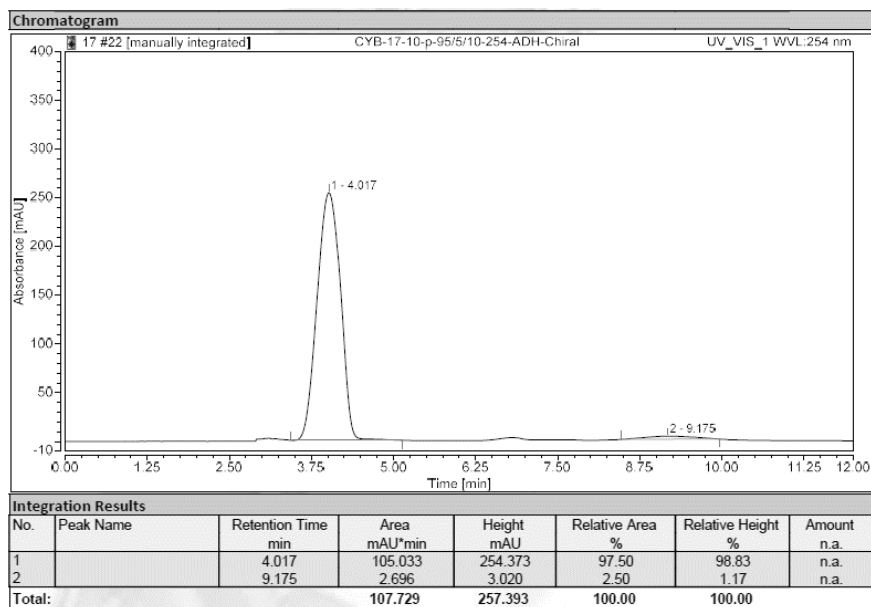

**Supplementary Figure 45.** HPLC spectrum for compound (-)-2p

(+)-**1q**: IE, *i*-PrOH/hexane = 20/80,  $v = 1.0$  mL/min,  $\lambda = 254$  nm

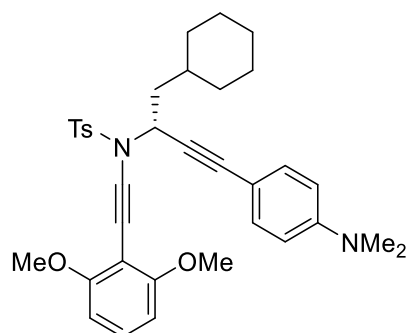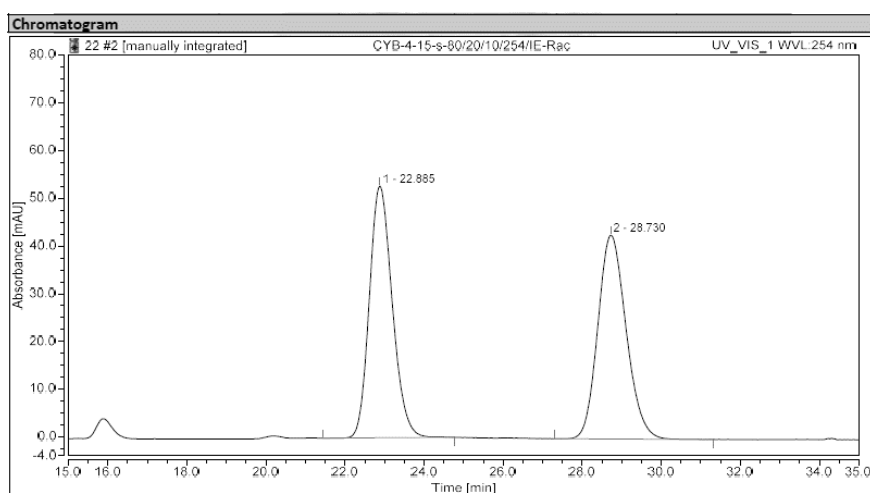

**Integration Results**

| No.           | Peak Name | Retention Time<br>min | Area<br>mAU*min | Height<br>mAU | Relative Area<br>% | Relative Height<br>% | Amount<br>n.a. |
|---------------|-----------|-----------------------|-----------------|---------------|--------------------|----------------------|----------------|
| 1             |           | 22.885                | 35.376          | 52.786        | 49.97              | 55.24                | n.a.           |
| 2             |           | 28.730                | 35.417          | 42.776        | 50.03              | 44.76                | n.a.           |
| <b>Total:</b> |           |                       | <b>70.792</b>   | <b>95.562</b> | <b>100.00</b>      | <b>100.00</b>        |                |

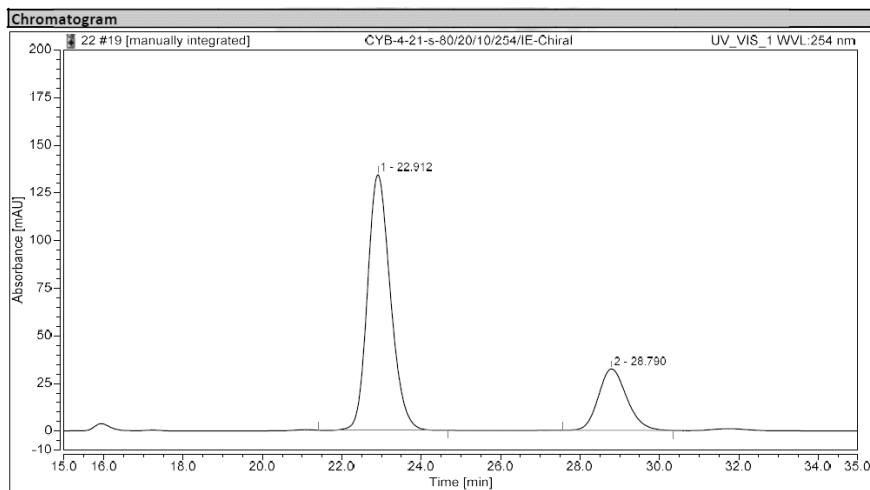

**Integration Results**

| No.           | Peak Name | Retention Time<br>min | Area<br>mAU*min | Height<br>mAU  | Relative Area<br>% | Relative Height<br>% | Amount<br>n.a. |
|---------------|-----------|-----------------------|-----------------|----------------|--------------------|----------------------|----------------|
| 1             |           | 22.912                | 89.759          | 134.176        | 77.14              | 80.64                | n.a.           |
| 2             |           | 28.790                | 26.593          | 32.210         | 22.86              | 19.36                | n.a.           |
| <b>Total:</b> |           |                       | <b>116.352</b>  | <b>166.386</b> | <b>100.00</b>      | <b>100.00</b>        |                |

**Supplementary Figure 46.** HPLC spectrum for compound (+)-**1q**

(-)-2q: IE, *i*-PrOH/hexane = 30/70,  $v = 1.0$  mL/min,  $\lambda = 254$  nm

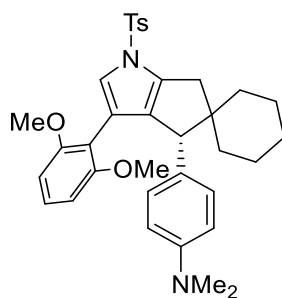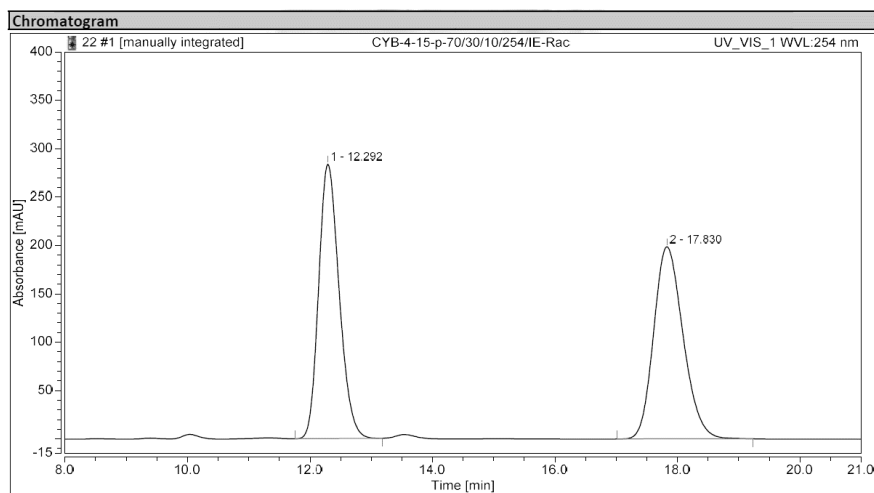

**Integration Results**

| No.           | Peak Name | Retention Time<br>min | Area<br>mAU*min | Height<br>mAU  | Relative Area<br>% | Relative Height<br>% | Amount<br>n.a. |
|---------------|-----------|-----------------------|-----------------|----------------|--------------------|----------------------|----------------|
| 1             |           | 12.292                | 109.978         | 283.782        | 49.88              | 58.81                | n.a.           |
| 2             |           | 17.830                | 110.505         | 198.726        | 50.12              | 41.19                | n.a.           |
| <b>Total:</b> |           |                       | <b>220.483</b>  | <b>482.507</b> | <b>100.00</b>      | <b>100.00</b>        |                |

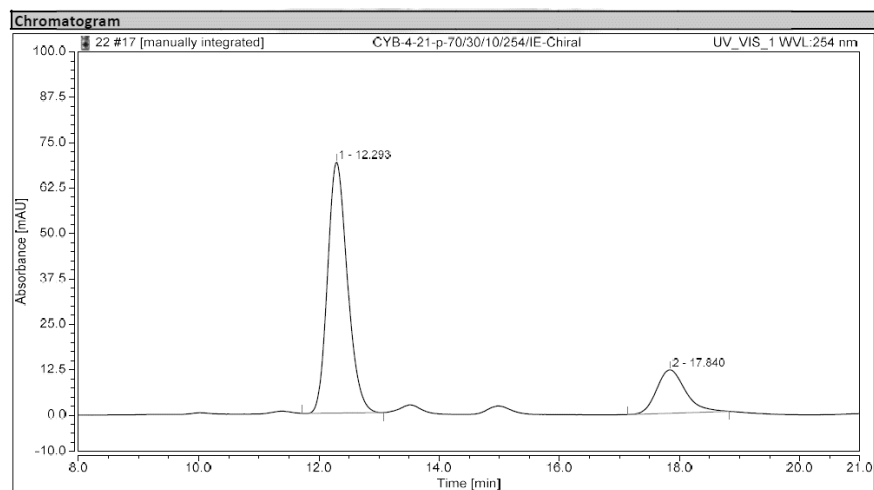

**Integration Results**

| No.           | Peak Name | Retention Time<br>min | Area<br>mAU*min | Height<br>mAU | Relative Area<br>% | Relative Height<br>% | Amount<br>n.a. |
|---------------|-----------|-----------------------|-----------------|---------------|--------------------|----------------------|----------------|
| 1             |           | 12.293                | 26.520          | 69.098        | 80.01              | 85.27                | n.a.           |
| 2             |           | 17.840                | 6.627           | 11.941        | 19.99              | 14.73                | n.a.           |
| <b>Total:</b> |           |                       | <b>33.147</b>   | <b>81.039</b> | <b>100.00</b>      | <b>100.00</b>        |                |

**Supplementary Figure 47.** HPLC spectrum for compound (-)-2q

(+)-1r: ODH, *i*-PrOH/hexane = 3/97,  $v = 1.0$  mL/min,  $\lambda = 254$  nm

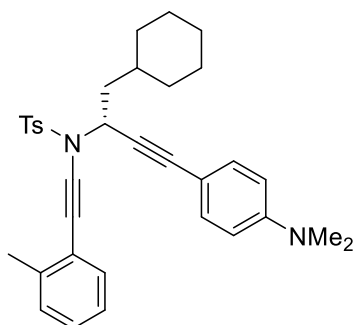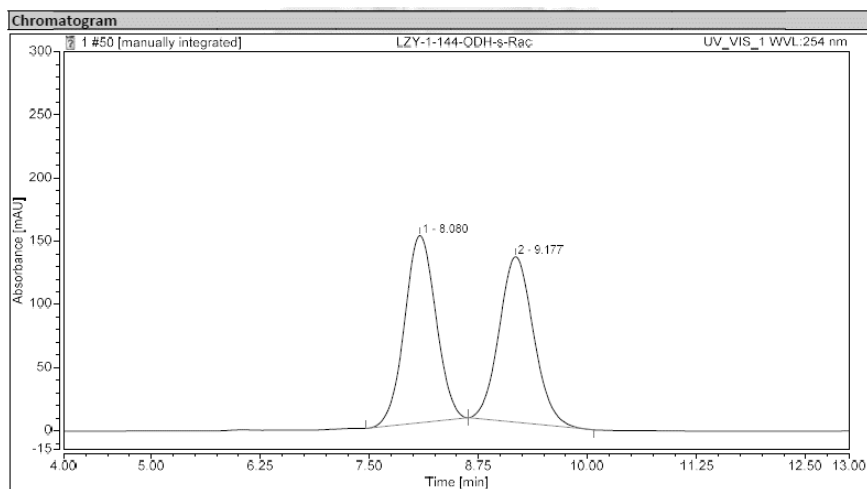

**Integration Results**

| No.           | Peak Name | Retention Time<br>min | Area<br>mAU*min | Height<br>mAU  | Relative Area<br>% | Relative Height<br>% | Amount<br>n.a. |
|---------------|-----------|-----------------------|-----------------|----------------|--------------------|----------------------|----------------|
| 1             |           | 8.080                 | 61.856          | 148.198        | 50.72              | 53.07                | n.a.           |
| 2             |           | 9.177                 | 60.104          | 131.043        | 49.28              | 46.93                | n.a.           |
| <b>Total:</b> |           |                       | <b>121.960</b>  | <b>279.241</b> | <b>100.00</b>      | <b>100.00</b>        |                |

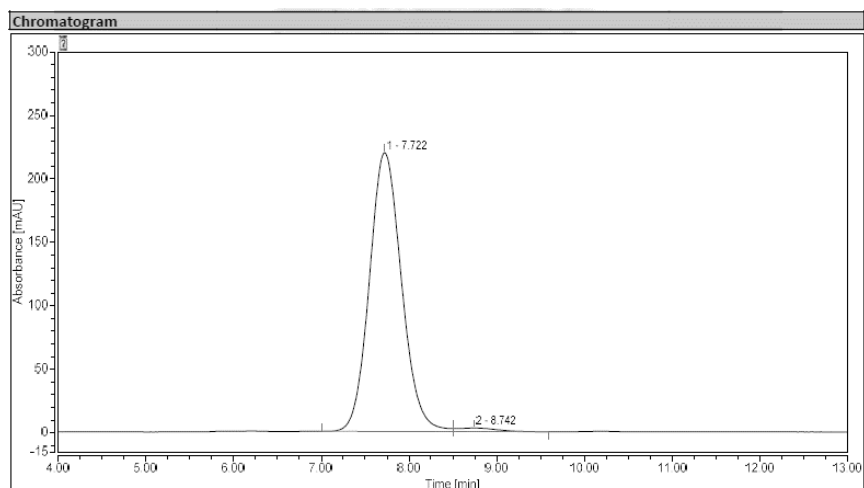

**Integration Results**

| No.           | Peak Name | Retention Time<br>min | Area<br>mAU*min | Height<br>mAU  | Relative Area<br>% | Relative Height<br>% | Amount<br>n.a. |
|---------------|-----------|-----------------------|-----------------|----------------|--------------------|----------------------|----------------|
| 1             |           | 7.722                 | 93.416          | 219.773        | 98.46              | 98.73                | n.a.           |
| 2             |           | 8.742                 | 1.460           | 2.834          | 1.54               | 1.27                 | n.a.           |
| <b>Total:</b> |           |                       | <b>94.875</b>   | <b>222.607</b> | <b>100.00</b>      | <b>100.00</b>        |                |

**Supplementary Figure 48.** HPLC spectrum for compound (+)-1r

(-)-2r: IE, *i*-PrOH/hexane = 10/90,  $v = 1.0$  mL/min,  $\lambda = 254$  nm

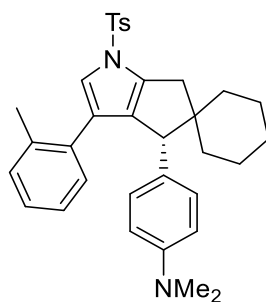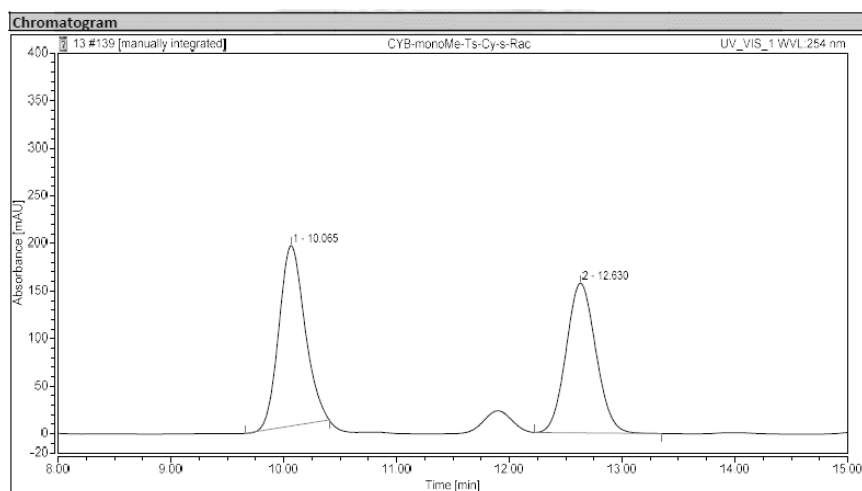

**Integration Results**

| No.           | Peak Name | Retention Time min | Area mAU*min  | Height mAU     | Relative Area % | Relative Height % | Amount |
|---------------|-----------|--------------------|---------------|----------------|-----------------|-------------------|--------|
| 1             |           | 10.065             | 50.459        | 189.539        | 51.22           | 54.67             | n.a.   |
| 2             |           | 12.630             | 48.048        | 157.131        | 48.78           | 45.33             | n.a.   |
| <b>Total:</b> |           |                    | <b>98.506</b> | <b>346.669</b> | <b>100.00</b>   | <b>100.00</b>     |        |

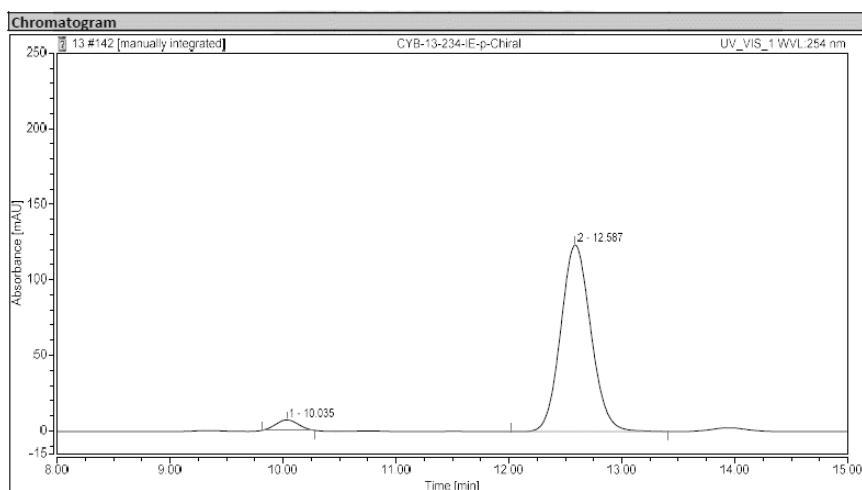

**Integration Results**

| No.           | Peak Name | Retention Time min | Area mAU*min  | Height mAU     | Relative Area % | Relative Height % | Amount |
|---------------|-----------|--------------------|---------------|----------------|-----------------|-------------------|--------|
| 1             |           | 10.035             | 1.602         | 6.944          | 4.03            | 5.32              | n.a.   |
| 2             |           | 12.587             | 38.140        | 123.489        | 95.97           | 94.68             | n.a.   |
| <b>Total:</b> |           |                    | <b>39.742</b> | <b>130.433</b> | <b>100.00</b>   | <b>100.00</b>     |        |

**Supplementary Figure 49.** HPLC spectrum for compound (-)-2r

(+)-1s: ADH, *i*-PrOH/hexane = 5/95,  $v = 1.0$  mL/min,  $\lambda = 254$  nm

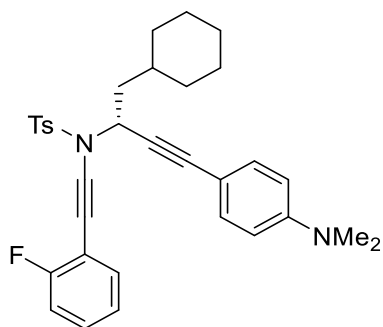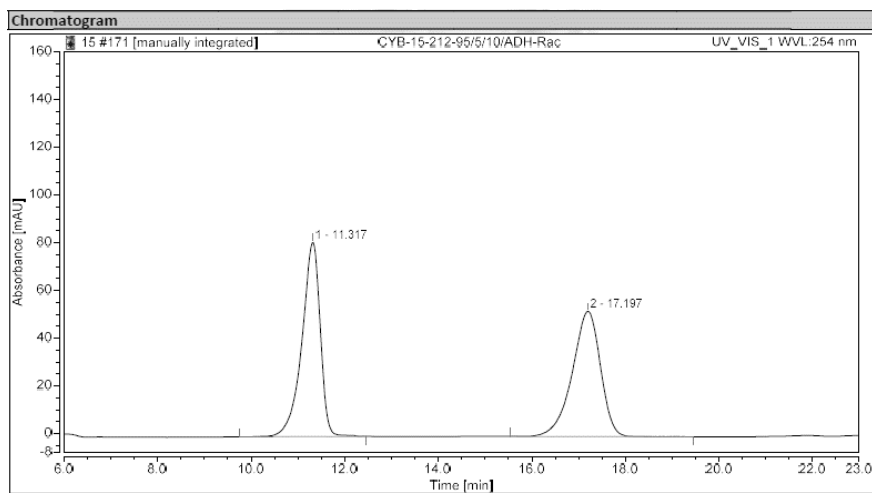

**Integration Results**

| No.    | Peak Name | Retention Time min | Area mAU*min | Height mAU | Relative Area % | Relative Height % | Amount |
|--------|-----------|--------------------|--------------|------------|-----------------|-------------------|--------|
| 1      |           | 11.317             | 37.083       | 81.472     | 50.32           | 60.80             | n.a.   |
| 2      |           | 17.197             | 36.615       | 52.526     | 49.68           | 39.20             | n.a.   |
| Total: |           |                    | 73.697       | 133.998    | 100.00          | 100.00            |        |

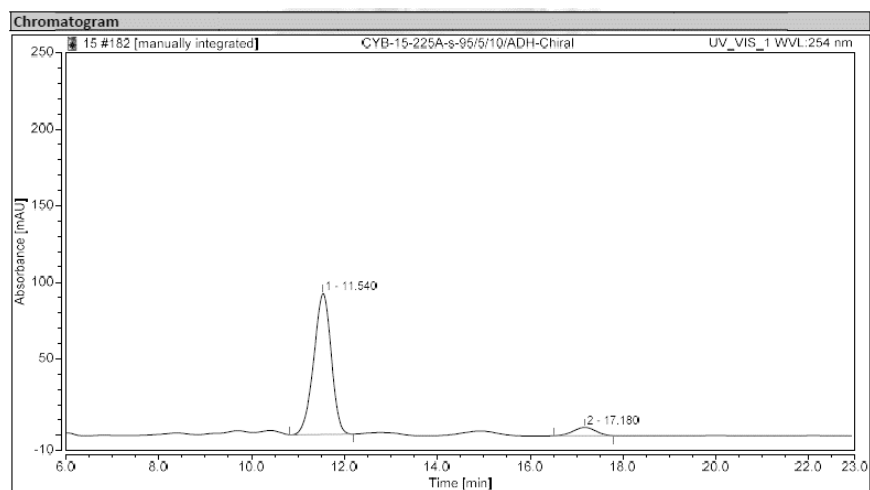

**Integration Results**

| No.    | Peak Name | Retention Time min | Area mAU*min | Height mAU | Relative Area % | Relative Height % | Amount |
|--------|-----------|--------------------|--------------|------------|-----------------|-------------------|--------|
| 1      |           | 11.540             | 40.245       | 92.091     | 92.91           | 94.39             | n.a.   |
| 2      |           | 17.180             | 3.072        | 5.475      | 7.09            | 5.61              | n.a.   |
| Total: |           |                    | 43.318       | 97.566     | 100.00          | 100.00            |        |

**Supplementary Figure 50.** HPLC spectrum for compound (+)-1s

(-)-2s: **IE**, *i*-PrOH/hexane = 10/90,  $v = 1.0$  mL/min,  $\lambda = 254$  nm

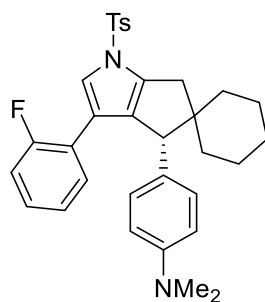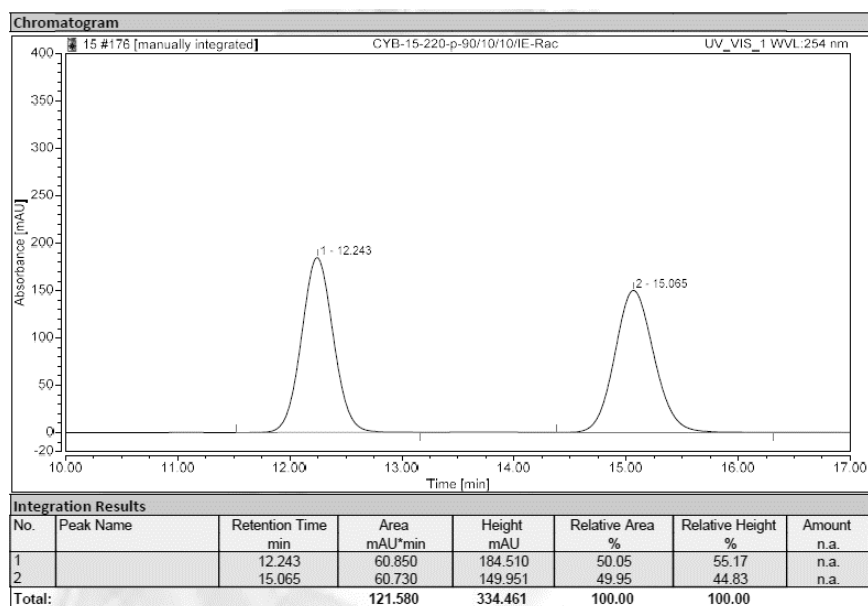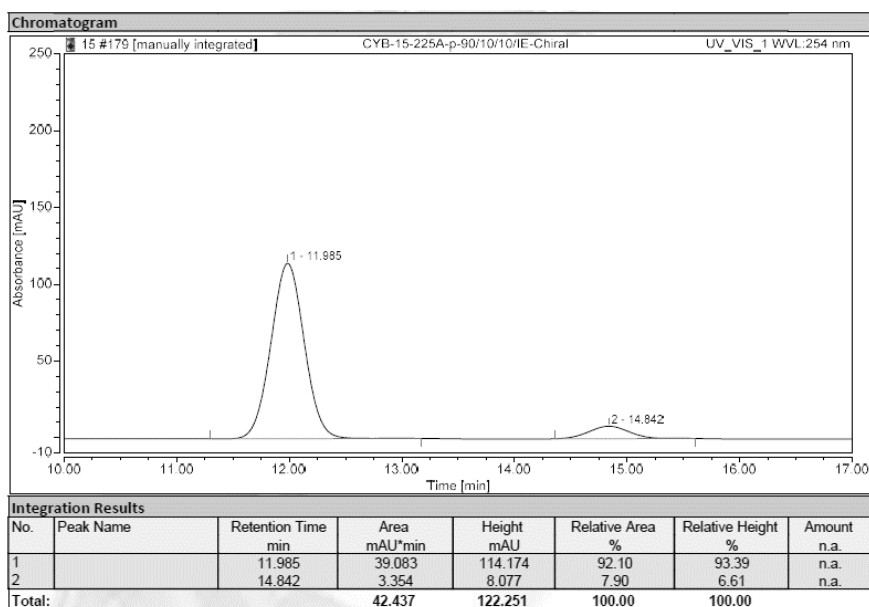

**Supplementary Figure 51.** HPLC spectrum for compound (-)-2s

(+)-1t: IE, *i*-PrOH/hexane = 10/90,  $v = 1.0$  mL/min,  $\lambda = 254$  nm

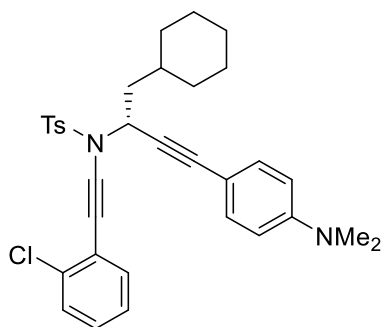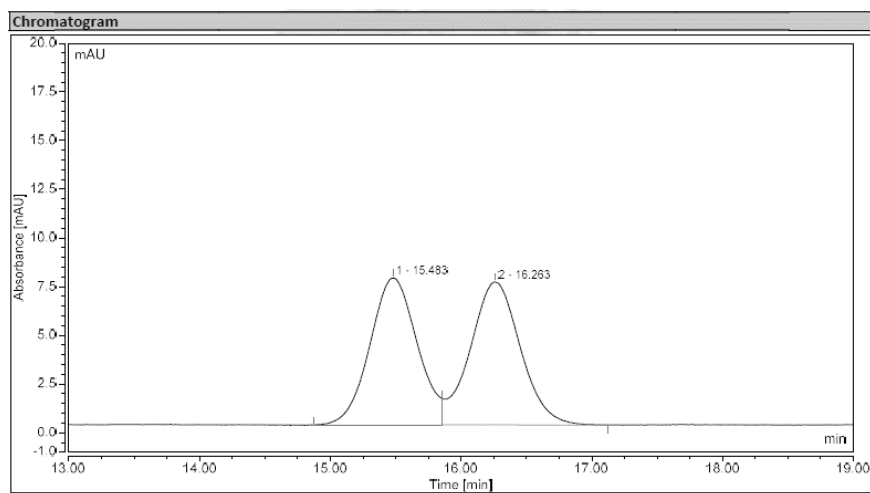

**Integration Results**

| No.           | Peak Name | Retention Time<br>min | Area<br>mAU*min | Height<br>mAU | Relative Area<br>% | Relative Height<br>% | Amount<br>n.a. |
|---------------|-----------|-----------------------|-----------------|---------------|--------------------|----------------------|----------------|
| 1             |           | 15.483                | 3.151           | 7.542         | 49.14              | 50.68                | n.a.           |
| 2             |           | 16.263                | 3.261           | 7.339         | 50.86              | 49.32                | n.a.           |
| <b>Total:</b> |           |                       | <b>6.412</b>    | <b>14.881</b> | <b>100.00</b>      | <b>100.00</b>        |                |

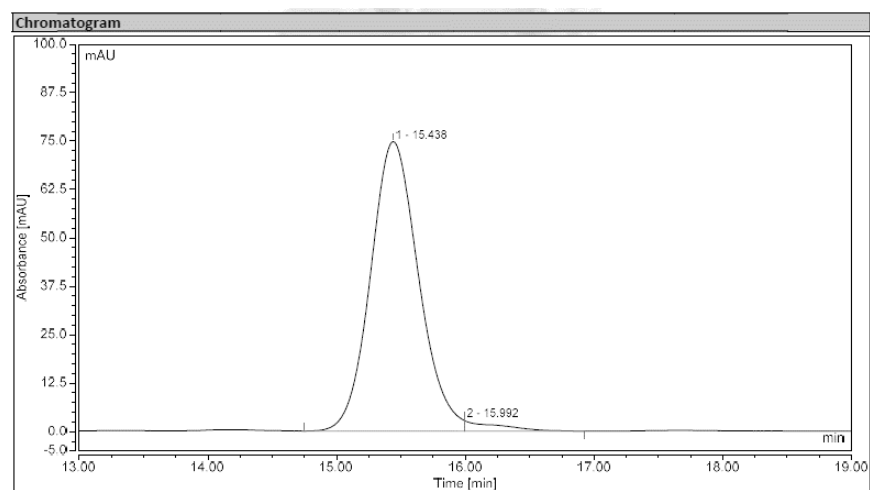

**Integration Results**

| No.           | Peak Name | Retention Time<br>min | Area<br>mAU*min | Height<br>mAU | Relative Area<br>% | Relative Height<br>% | Amount<br>n.a. |
|---------------|-----------|-----------------------|-----------------|---------------|--------------------|----------------------|----------------|
| 1             |           | 15.438                | 32.258          | 74.744        | 97.56              | 96.44                | n.a.           |
| 2             |           | 15.992                | 0.806           | 2.762         | 2.44               | 3.56                 | n.a.           |
| <b>Total:</b> |           |                       | <b>33.063</b>   | <b>77.507</b> | <b>100.00</b>      | <b>100.00</b>        |                |

**Supplementary Figure 52.** HPLC spectrum for compound (+)-1t



(-)-2t: **IE**, *i*-PrOH/hexane = 10/90,  $v = 1.0$  mL/min,  $\lambda = 254$  nm

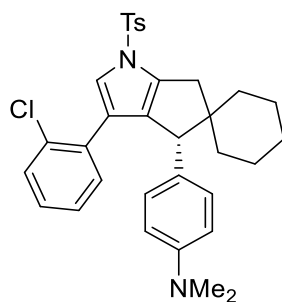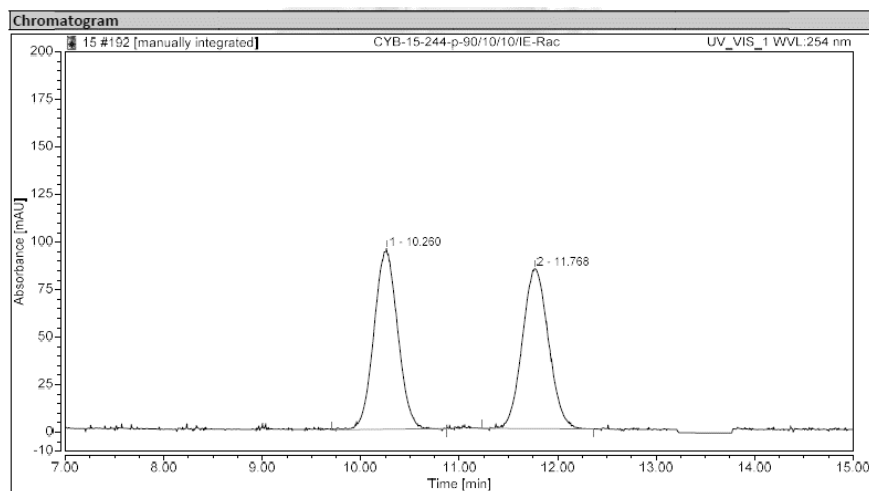

**Integration Results**

| No.           | Peak Name | Retention Time min | Area mAU*min  | Height mAU     | Relative Area % | Relative Height % | Amount |
|---------------|-----------|--------------------|---------------|----------------|-----------------|-------------------|--------|
| 1             |           | 10.260             | 26.316        | 95.062         | 50.42           | 53.04             | n.a.   |
| 2             |           | 11.768             | 25.873        | 84.149         | 49.58           | 46.96             | n.a.   |
| <b>Total:</b> |           |                    | <b>52.189</b> | <b>179.210</b> | <b>100.00</b>   | <b>100.00</b>     |        |

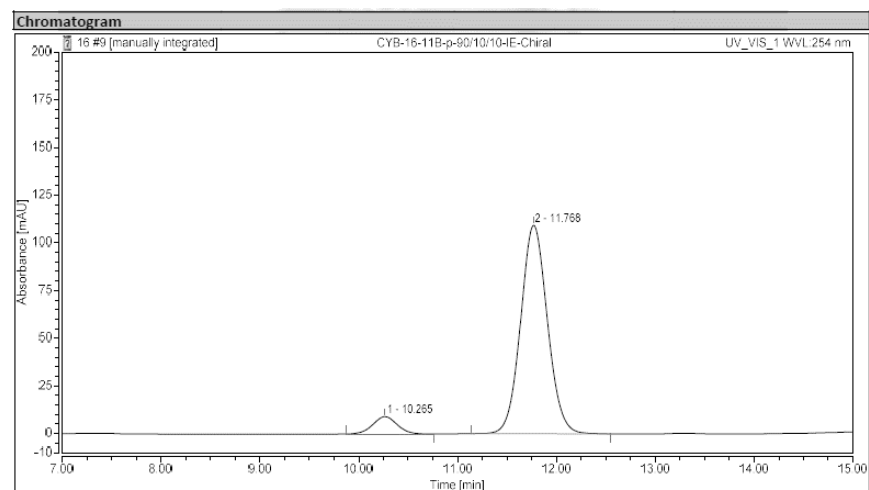

**Integration Results**

| No.           | Peak Name | Retention Time min | Area mAU*min  | Height mAU     | Relative Area % | Relative Height % | Amount |
|---------------|-----------|--------------------|---------------|----------------|-----------------|-------------------|--------|
| 1             |           | 10.265             | 2.599         | 9.099          | 7.04            | 7.68              | n.a.   |
| 2             |           | 11.768             | 34.336        | 109.385        | 92.96           | 92.32             | n.a.   |
| <b>Total:</b> |           |                    | <b>36.934</b> | <b>118.484</b> | <b>100.00</b>   | <b>100.00</b>     |        |

**Supplementary Figure 53.** HPLC spectrum for compound (-)-2t

(+)-**1u**: ADH, *i*-PrOH/hexane = 5/95,  $v = 1.0$  mL/min,  $\lambda = 254$  nm

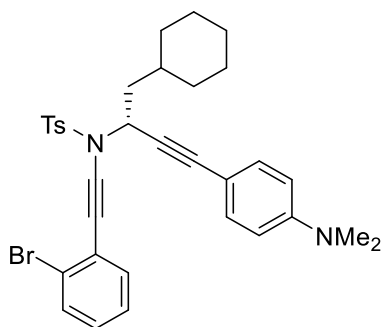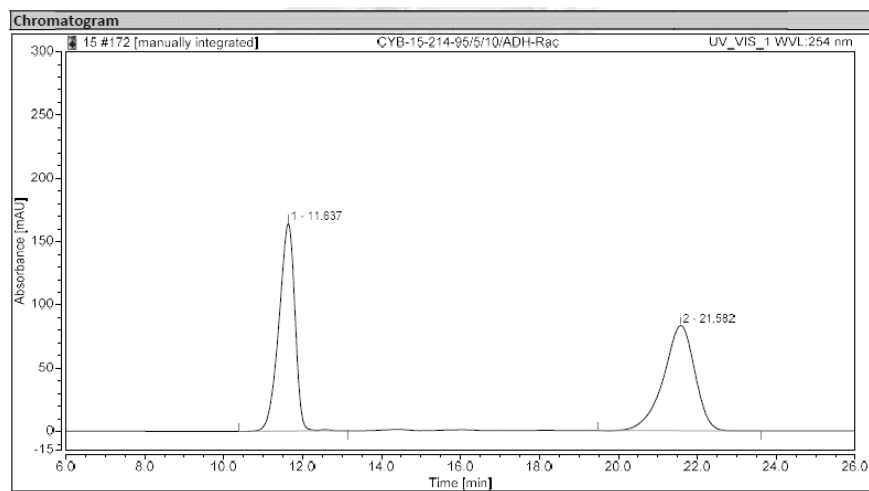

**Integration Results**

| No.           | Peak Name | Retention Time min | Area mAU*min   | Height mAU     | Relative Area % | Relative Height % | Amount |
|---------------|-----------|--------------------|----------------|----------------|-----------------|-------------------|--------|
| 1             |           | 11.637             | 77.045         | 164.203        | 50.17           | 66.41             | n.a.   |
| 2             |           | 21.582             | 76.526         | 83.056         | 49.83           | 33.59             | n.a.   |
| <b>Total:</b> |           |                    | <b>153.571</b> | <b>247.259</b> | <b>100.00</b>   | <b>100.00</b>     |        |

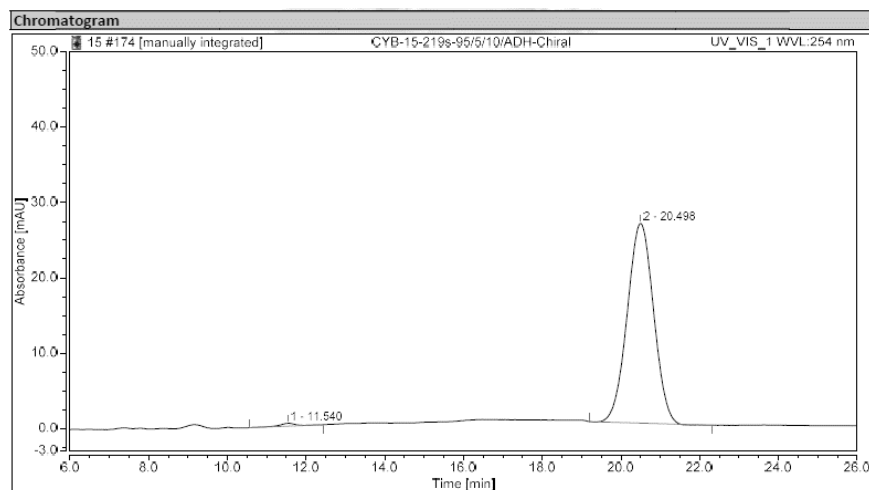

**Integration Results**

| No.           | Peak Name | Retention Time min | Area mAU*min  | Height mAU    | Relative Area % | Relative Height % | Amount |
|---------------|-----------|--------------------|---------------|---------------|-----------------|-------------------|--------|
| 1             |           | 11.540             | 0.165         | 0.382         | 0.80            | 1.42              | n.a.   |
| 2             |           | 20.498             | 20.539        | 26.523        | 99.20           | 98.58             | n.a.   |
| <b>Total:</b> |           |                    | <b>20.704</b> | <b>26.905</b> | <b>100.00</b>   | <b>100.00</b>     |        |

**Supplementary Figure 54.** HPLC spectrum for compound (+)-**1u**

(-)-**2u**: IE, *i*-PrOH/hexane = 10/90,  $v = 1.0$  mL/min,  $\lambda = 254$  nm

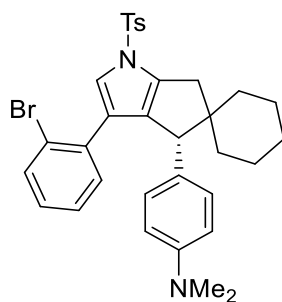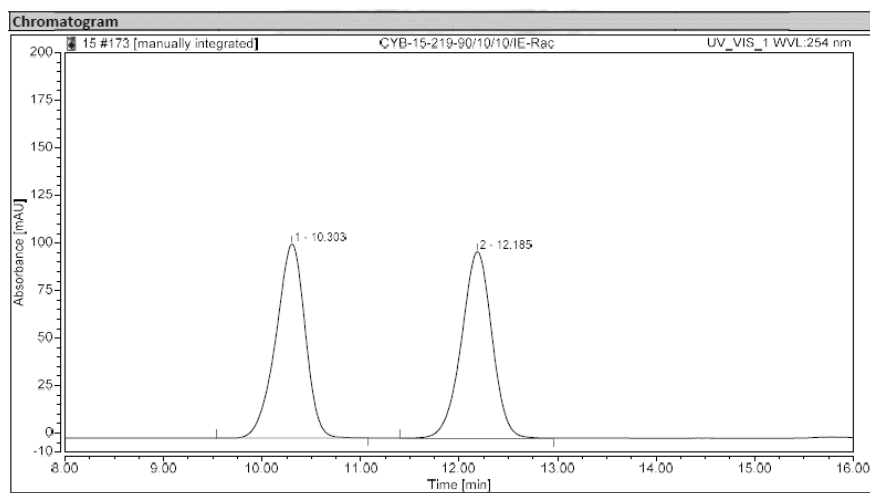

**Integration Results**

| No.           | Peak Name | Retention Time min | Area mAU*min  | Height mAU     | Relative Area % | Relative Height % | Amount |
|---------------|-----------|--------------------|---------------|----------------|-----------------|-------------------|--------|
| 1             |           | 10.303             | 35.151        | 101.960        | 50.00           | 51.00             | n.a.   |
| 2             |           | 12.185             | 35.152        | 97.980         | 50.00           | 49.00             | n.a.   |
| <b>Total:</b> |           |                    | <b>70.303</b> | <b>199.940</b> | <b>100.00</b>   | <b>100.00</b>     |        |

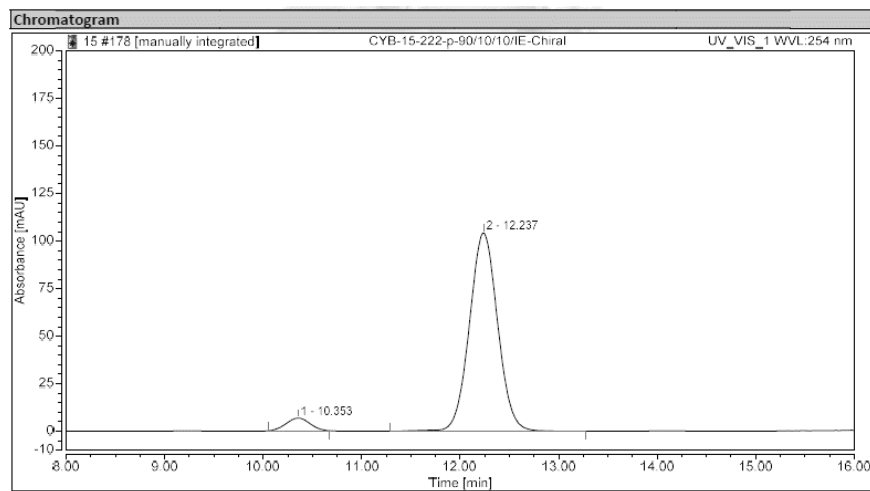

**Integration Results**

| No.           | Peak Name | Retention Time min | Area mAU*min  | Height mAU     | Relative Area % | Relative Height % | Amount |
|---------------|-----------|--------------------|---------------|----------------|-----------------|-------------------|--------|
| 1             |           | 10.353             | 1.837         | 6.627          | 5.03            | 5.98              | n.a.   |
| 2             |           | 12.237             | 34.649        | 104.280        | 94.97           | 94.02             | n.a.   |
| <b>Total:</b> |           |                    | <b>36.485</b> | <b>110.906</b> | <b>100.00</b>   | <b>100.00</b>     |        |

**Supplementary Figure 55.** HPLC spectrum for compound (-)-**2u**

(+)-**1v**: ADH, *i*-PrOH/hexane = 10/90,  $v = 1.0$  mL/min,  $\lambda = 254$  nm

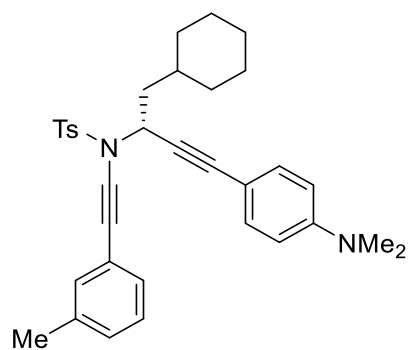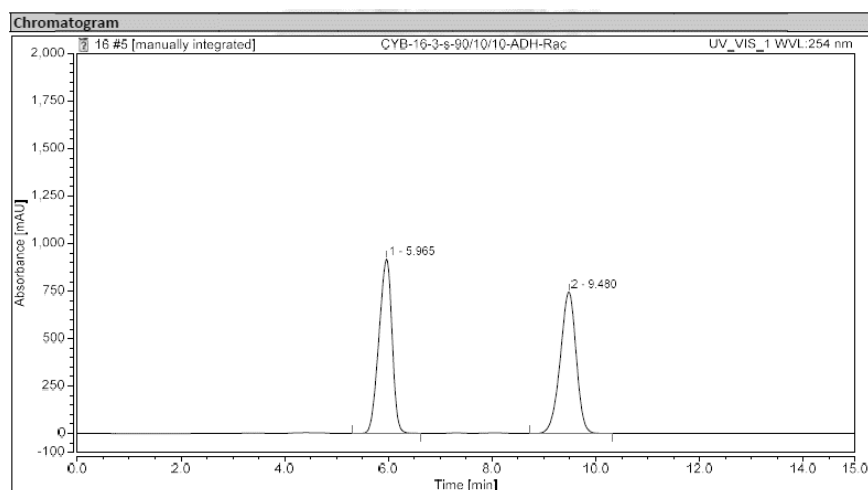

**Integration Results**

| No.           | Peak Name | Retention Time<br>min | Area<br>mAU*min | Height<br>mAU   | Relative Area<br>% | Relative Height<br>% | Amount<br>n.a. |
|---------------|-----------|-----------------------|-----------------|-----------------|--------------------|----------------------|----------------|
| 1             |           | 5.965                 | 267.845         | 919.168         | 50.17              | 55.21                | n.a.           |
| 2             |           | 9.480                 | 266.077         | 745.779         | 49.83              | 44.79                | n.a.           |
| <b>Total:</b> |           |                       | <b>533.921</b>  | <b>1664.946</b> | <b>100.00</b>      | <b>100.00</b>        |                |

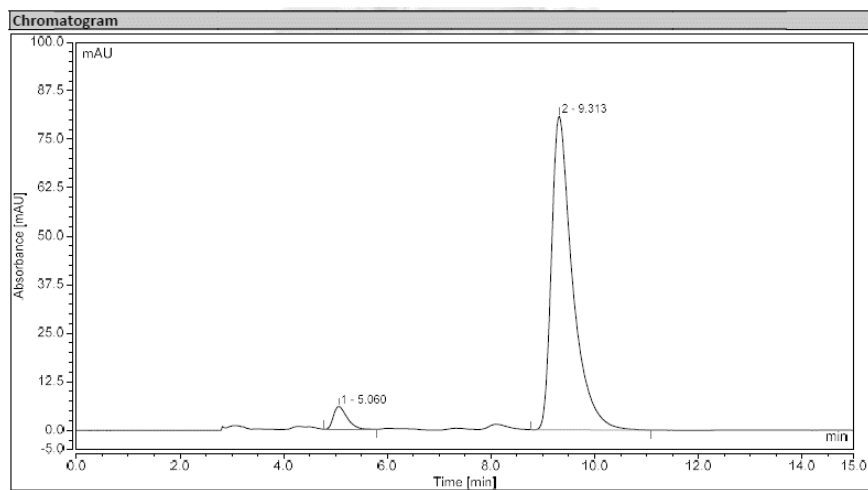

**Integration Results**

| No.           | Peak Name | Retention Time<br>min | Area<br>mAU*min | Height<br>mAU | Relative Area<br>% | Relative Height<br>% | Amount<br>n.a. |
|---------------|-----------|-----------------------|-----------------|---------------|--------------------|----------------------|----------------|
| 1             |           | 5.060                 | 1.774           | 5.845         | 4.45               | 6.74                 | n.a.           |
| 2             |           | 9.313                 | 38.056          | 80.860        | 95.55              | 93.26                | n.a.           |
| <b>Total:</b> |           |                       | <b>39.830</b>   | <b>86.705</b> | <b>100.00</b>      | <b>100.00</b>        |                |

**Supplementary Figure 56.** HPLC spectrum for compound (+)-**1v**

(-)-2v: IE, *i*-PrOH/hexane = 10/90,  $v = 1.0$  mL/min,  $\lambda = 254$  nm

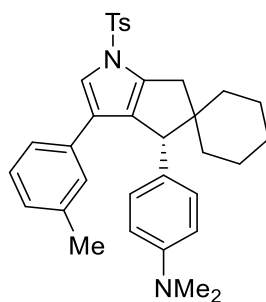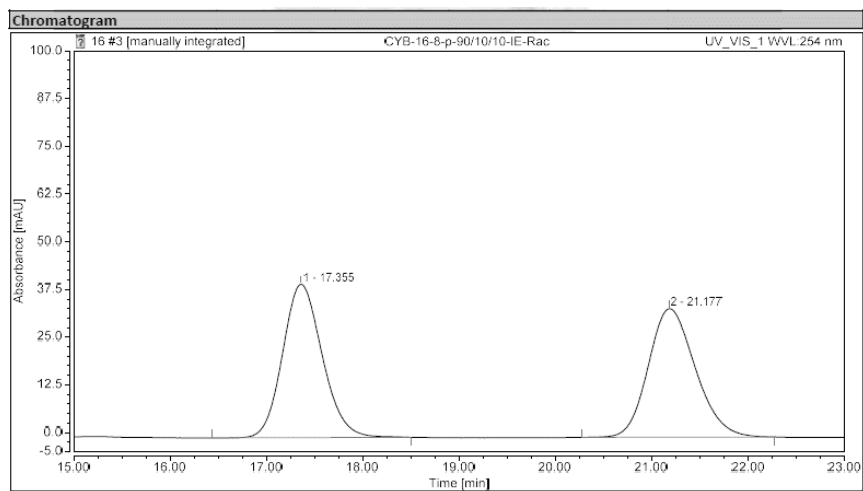

**Integration Results**

| No.           | Peak Name | Retention Time min | Area mAU*min  | Height mAU    | Relative Area % | Relative Height % | Amount |
|---------------|-----------|--------------------|---------------|---------------|-----------------|-------------------|--------|
| 1             |           | 17.355             | 19.139        | 40.174        | 50.13           | 54.41             | n.a.   |
| 2             |           | 21.177             | 19.039        | 33.661        | 49.87           | 45.59             | n.a.   |
| <b>Total:</b> |           |                    | <b>38.179</b> | <b>73.835</b> | <b>100.00</b>   | <b>100.00</b>     |        |

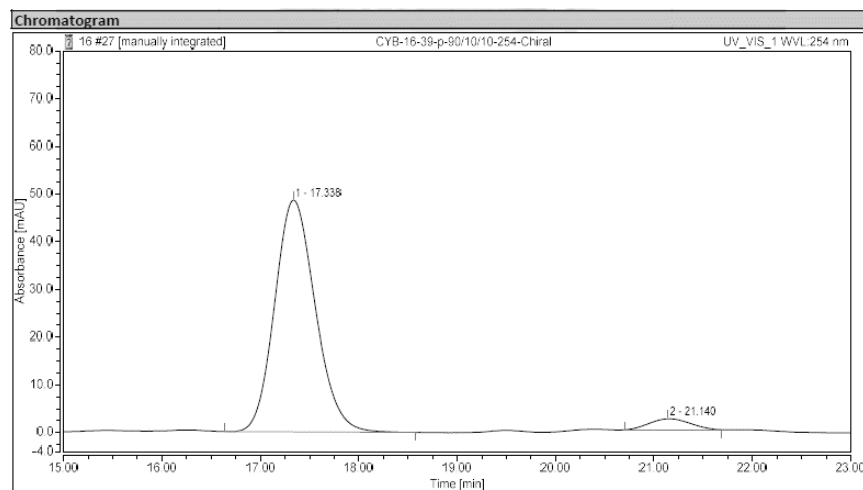

**Integration Results**

| No.           | Peak Name | Retention Time min | Area mAU*min  | Height mAU    | Relative Area % | Relative Height % | Amount |
|---------------|-----------|--------------------|---------------|---------------|-----------------|-------------------|--------|
| 1             |           | 17.338             | 23.268        | 48.618        | 95.49           | 95.48             | n.a.   |
| 2             |           | 21.140             | 1.100         | 2.300         | 4.51            | 4.52              | n.a.   |
| <b>Total:</b> |           |                    | <b>24.368</b> | <b>50.918</b> | <b>100.00</b>   | <b>100.00</b>     |        |

**Supplementary Figure 57.** HPLC spectrum for compound (-)-2v

(+)-**1w**: ADH, *i*-PrOH/hexane = 10/90,  $v = 1.0$  mL/min,  $\lambda = 254$  nm

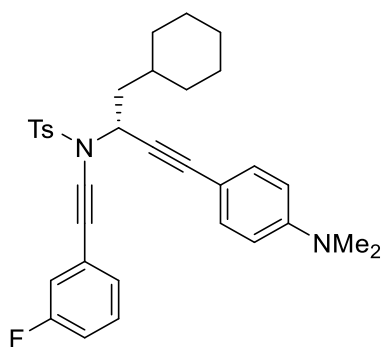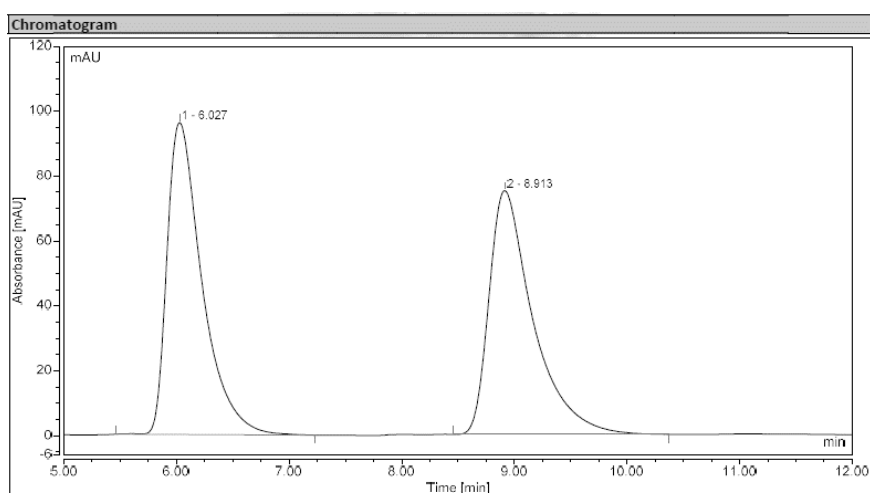

| Integration Results |           |                       |                 |               |                    |                      |                |
|---------------------|-----------|-----------------------|-----------------|---------------|--------------------|----------------------|----------------|
| No.                 | Peak Name | Retention Time<br>min | Area<br>mAU*min | Height<br>mAU | Relative Area<br>% | Relative Height<br>% | Amount<br>n.a. |
| 1                   |           | 6.027                 | 34.520          | 96.119        | 50.49              | 56.13                | n.a.           |
| 2                   |           | 8.913                 | 33.843          | 75.129        | 49.51              | 43.87                | n.a.           |
| Total:              |           |                       | 68.363          | 171.247       | 100.00             | 100.00               |                |

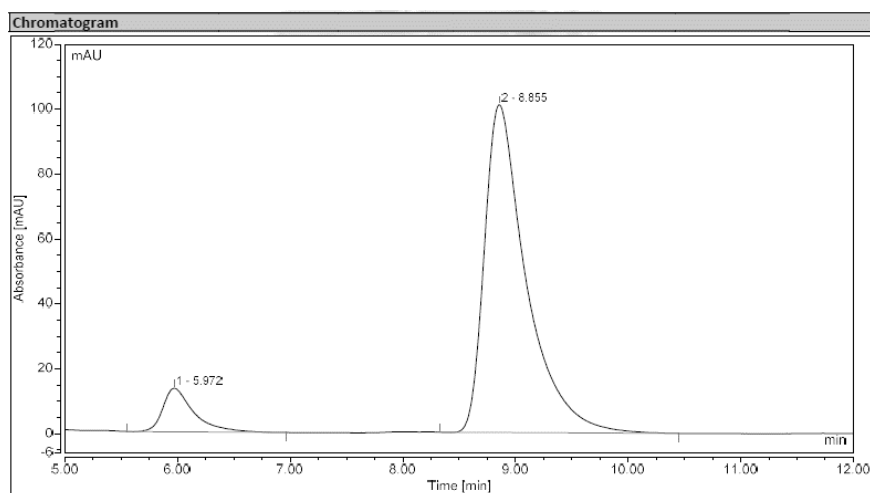

| Integration Results |           |                       |                 |               |                    |                      |                |
|---------------------|-----------|-----------------------|-----------------|---------------|--------------------|----------------------|----------------|
| No.                 | Peak Name | Retention Time<br>min | Area<br>mAU*min | Height<br>mAU | Relative Area<br>% | Relative Height<br>% | Amount<br>n.a. |
| 1                   |           | 5.972                 | 4.249           | 13.424        | 8.93               | 11.74                | n.a.           |
| 2                   |           | 8.855                 | 43.357          | 100.962       | 91.07              | 88.26                | n.a.           |
| Total:              |           |                       | 47.607          | 114.386       | 100.00             | 100.00               |                |

**Supplementary Figure 58.** HPLC spectrum for compound (+)-**1w**

(-)-2w: ADH, *i*-PrOH/hexane = 10/90,  $v = 1.0$  mL/min,  $\lambda = 254$  nm

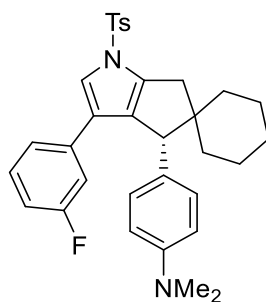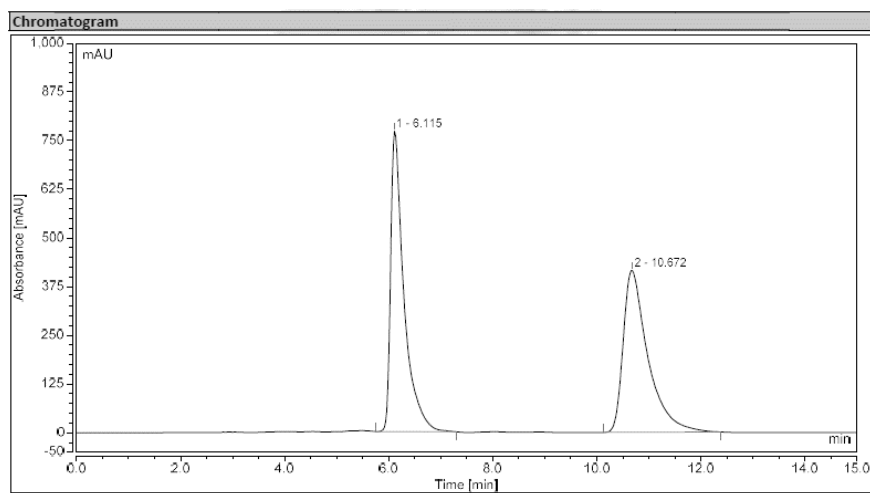

**Integration Results**

| No.           | Peak Name | Retention Time min | Area mAU*min   | Height mAU      | Relative Area % | Relative Height % | Amount n.a. |
|---------------|-----------|--------------------|----------------|-----------------|-----------------|-------------------|-------------|
| 1             |           | 6.115              | 228.628        | 772.023         | 50.01           | 64.99             | n.a.        |
| 2             |           | 10.672             | 228.564        | 415.953         | 49.99           | 35.01             | n.a.        |
| <b>Total:</b> |           |                    | <b>457.192</b> | <b>1187.976</b> | <b>100.00</b>   | <b>100.00</b>     |             |

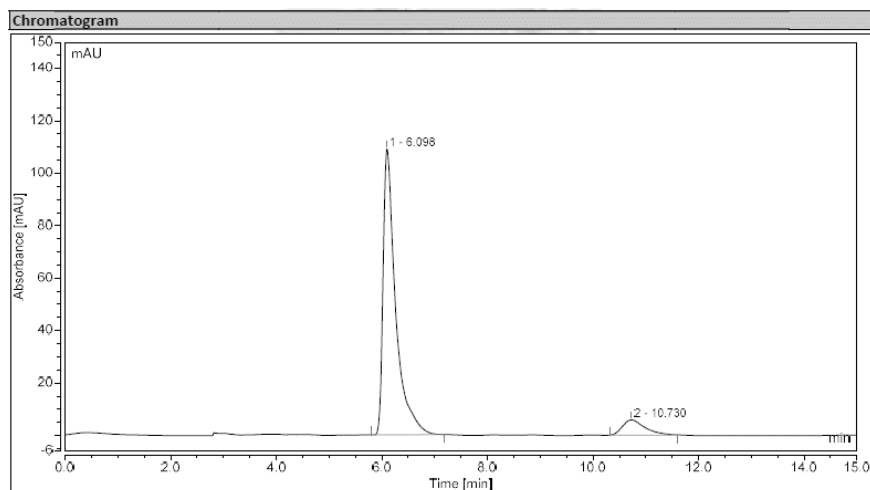

**Integration Results**

| No.           | Peak Name | Retention Time min | Area mAU*min  | Height mAU     | Relative Area % | Relative Height % | Amount n.a. |
|---------------|-----------|--------------------|---------------|----------------|-----------------|-------------------|-------------|
| 1             |           | 6.098              | 29.978        | 109.099        | 91.39           | 94.97             | n.a.        |
| 2             |           | 10.730             | 2.823         | 5.779          | 8.61            | 5.03              | n.a.        |
| <b>Total:</b> |           |                    | <b>32.801</b> | <b>114.879</b> | <b>100.00</b>   | <b>100.00</b>     |             |

**Supplementary Figure 59.** HPLC spectrum for compound (-)-2w

(+)-**1x**: ADH, *i*-PrOH/hexane = 10/90,  $v = 1.0$  mL/min,  $\lambda = 254$  nm

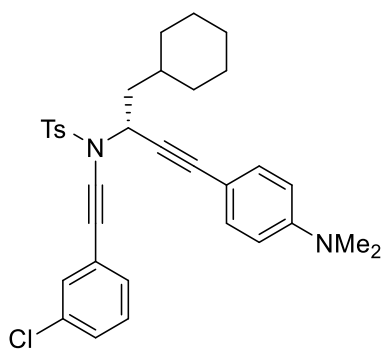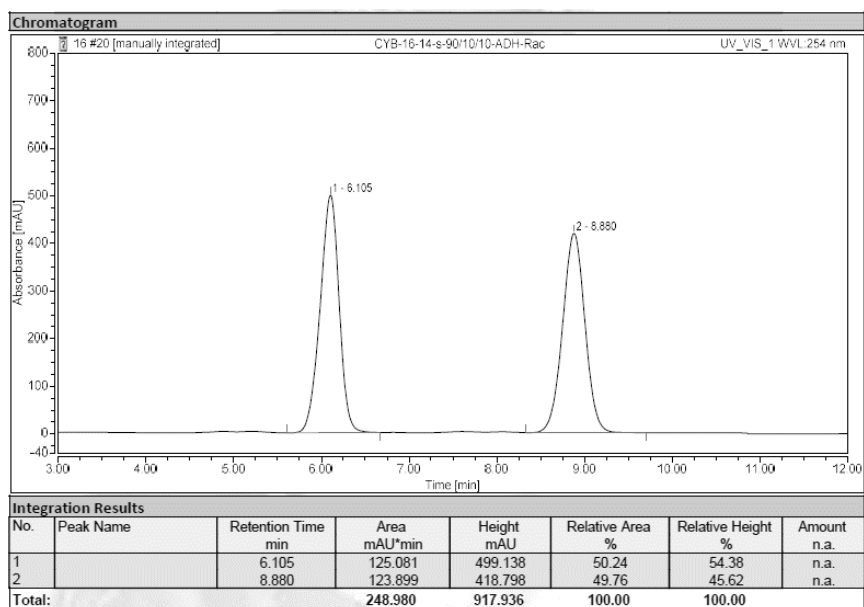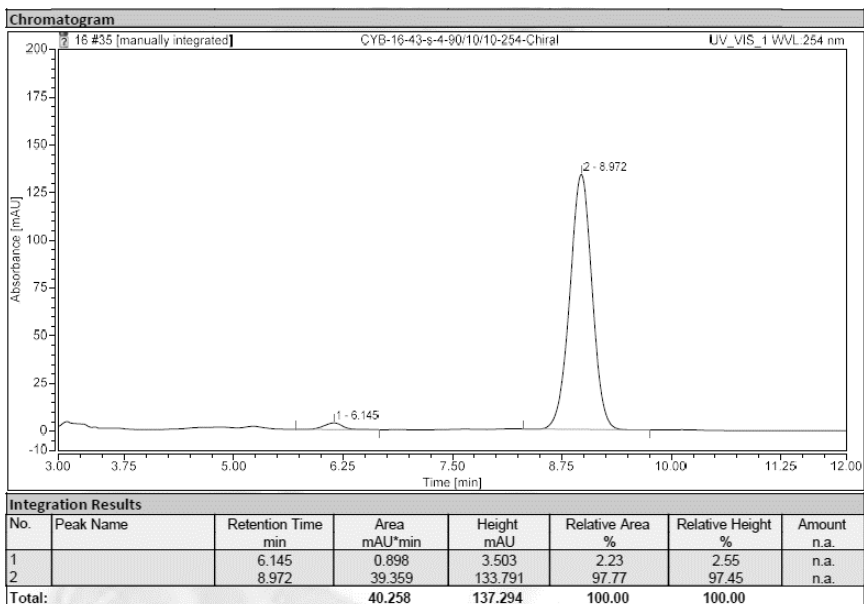

**Supplementary Figure 60.** HPLC spectrum for compound (+)-**1x**



(-)-2x: ADH, *i*-PrOH/hexane = 10/90,  $v = 1.0$  mL/min,  $\lambda = 254$  nm

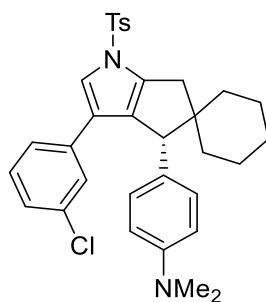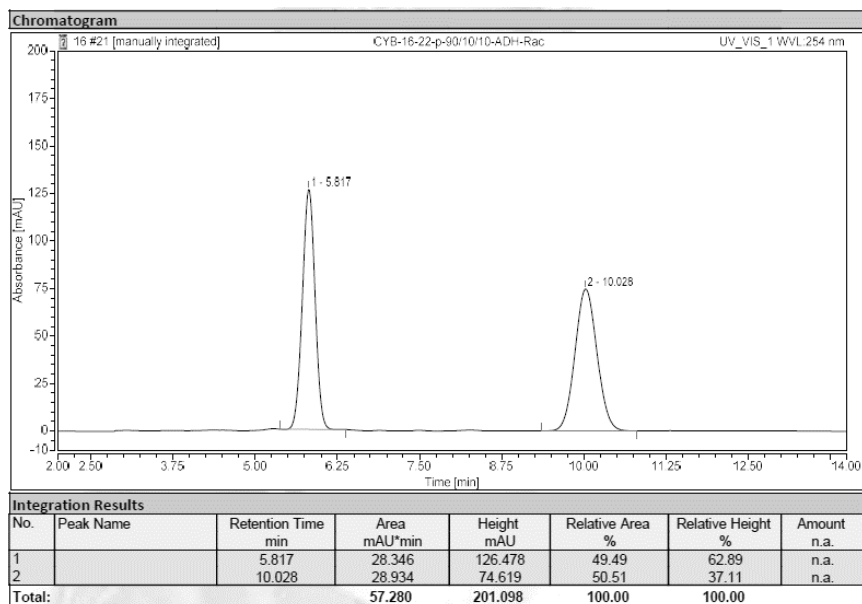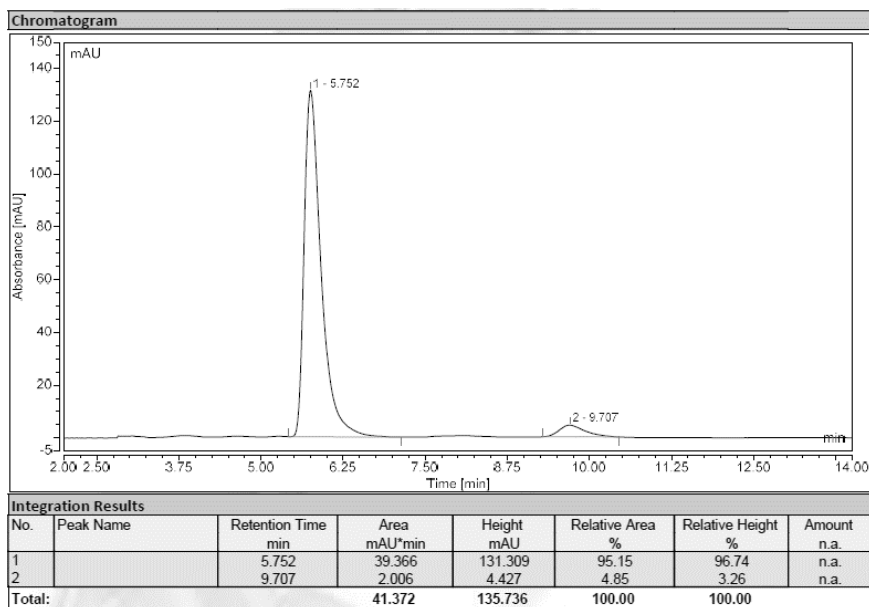

**Supplementary Figure 61.** HPLC spectrum for compound (-)-2x

(+)-**1y**: ADH, *i*-PrOH/hexane = 10/90,  $v = 1.0$  mL/min,  $\lambda = 254$  nm

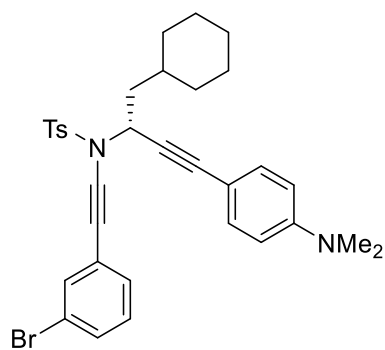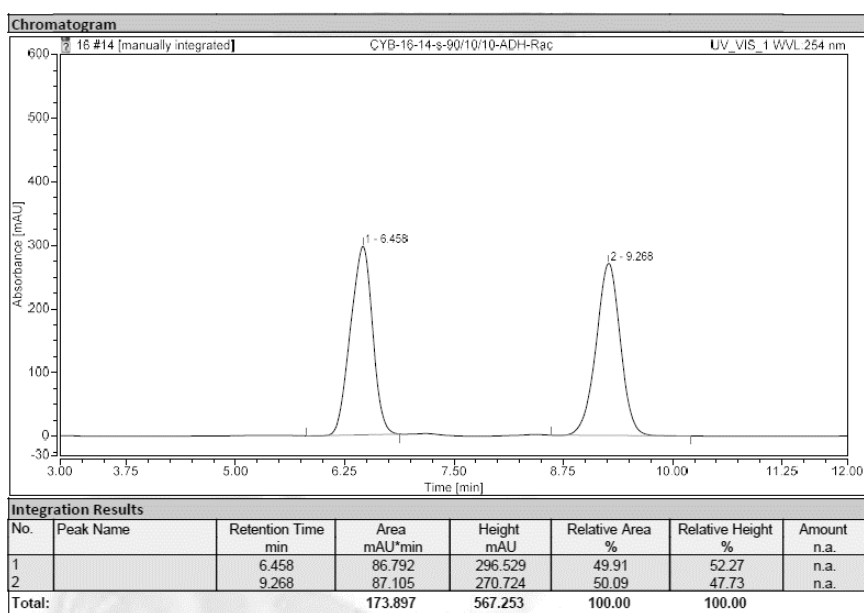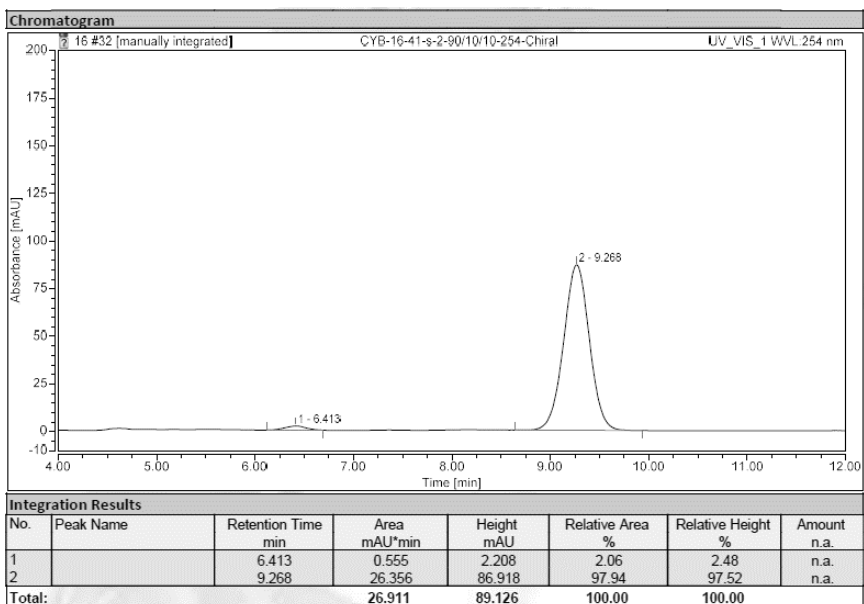

**Supplementary Figure 62.** HPLC spectrum for compound (+)-**1y**

(-)-2y: ADH, *i*-PrOH/hexane = 10/90,  $v = 1.0$  mL/min,  $\lambda = 254$  nm

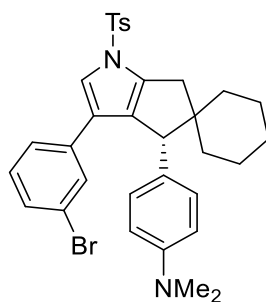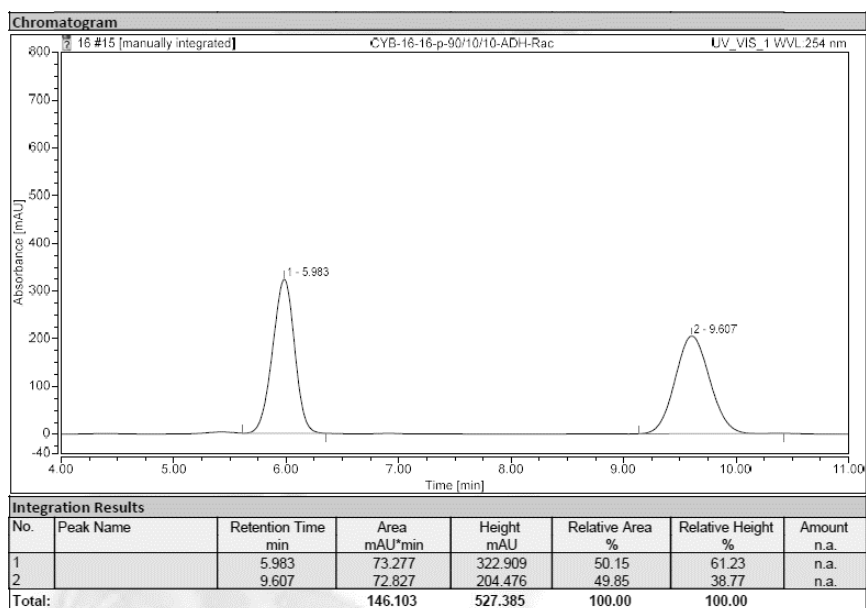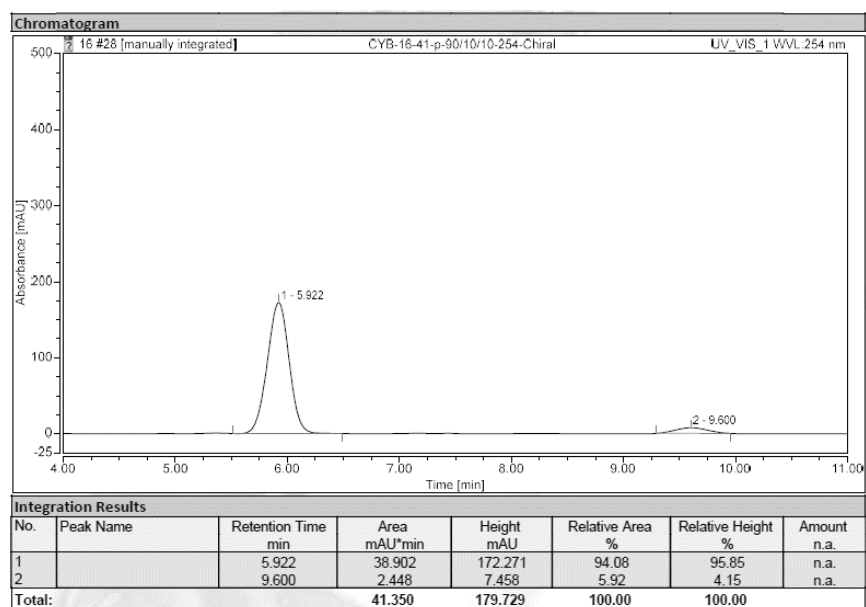

**Supplementary Figure 63.** HPLC spectrum for compound (-)-2y

(+)-**1z**: ADH, *i*-PrOH/hexane = 10/90,  $v = 1.0$  mL/min,  $\lambda = 254$  nm

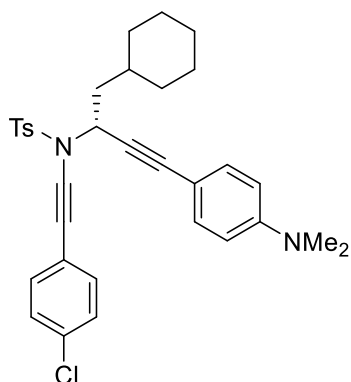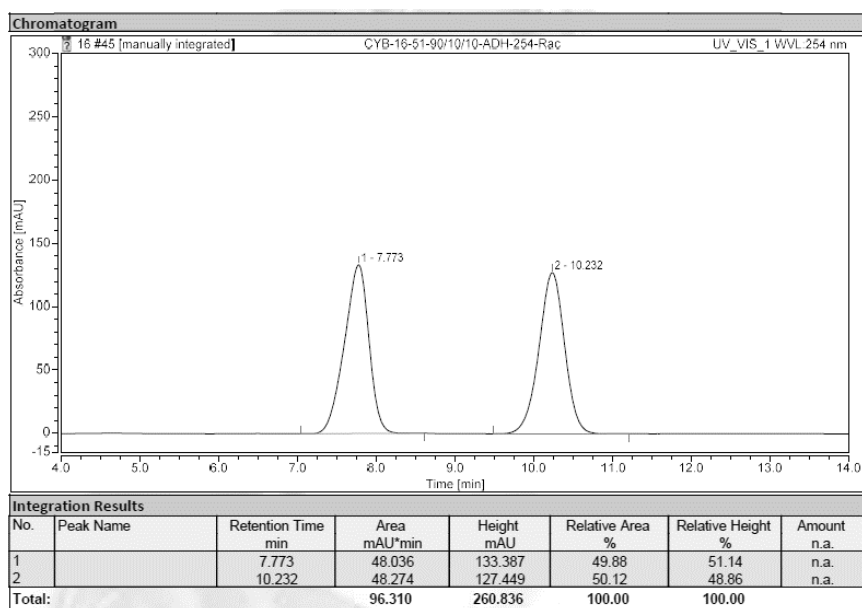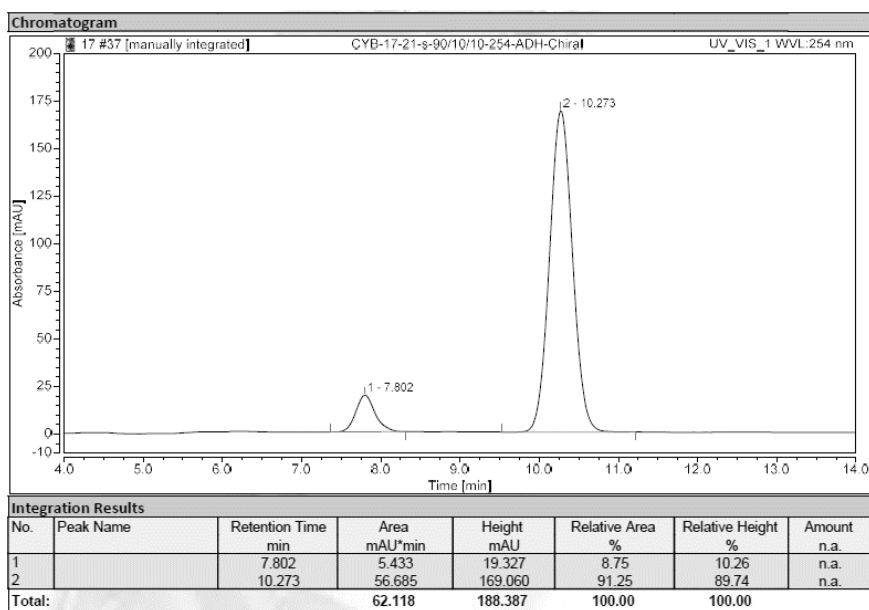

Supplementary Figure 64. HPLC spectrum for compound (+)-**1z**

(-)-2z: IG, *i*-PrOH/hexane = 50/50,  $v = 1.0$  mL/min,  $\lambda = 254$  nm

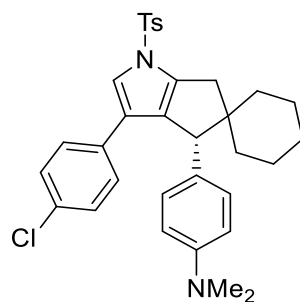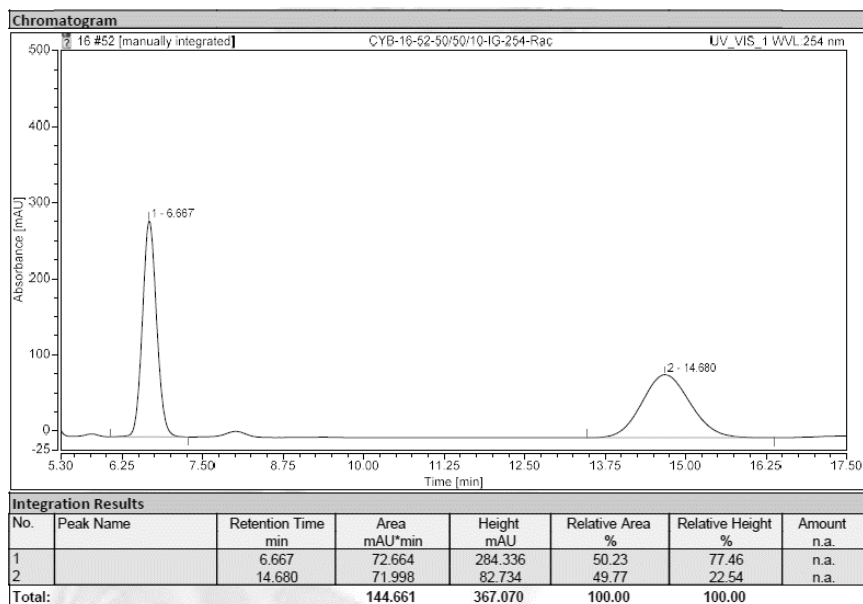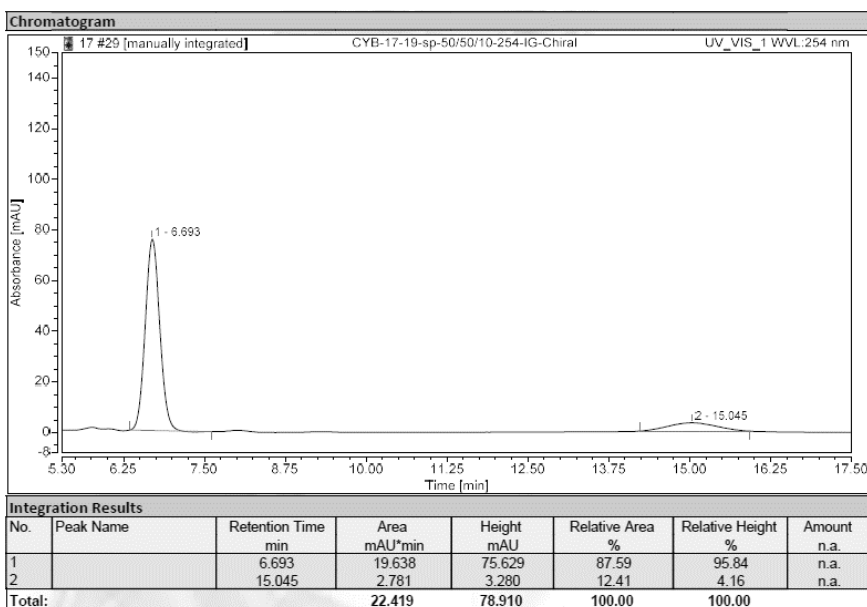

**Supplementary Figure 65.** HPLC spectrum for compound (-)-2z

(+)-1aa: ADH, *i*-PrOH/hexane = 10/90,  $v = 1.0$  mL/min,  $\lambda = 254$  nm

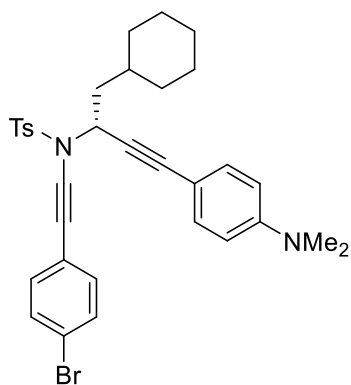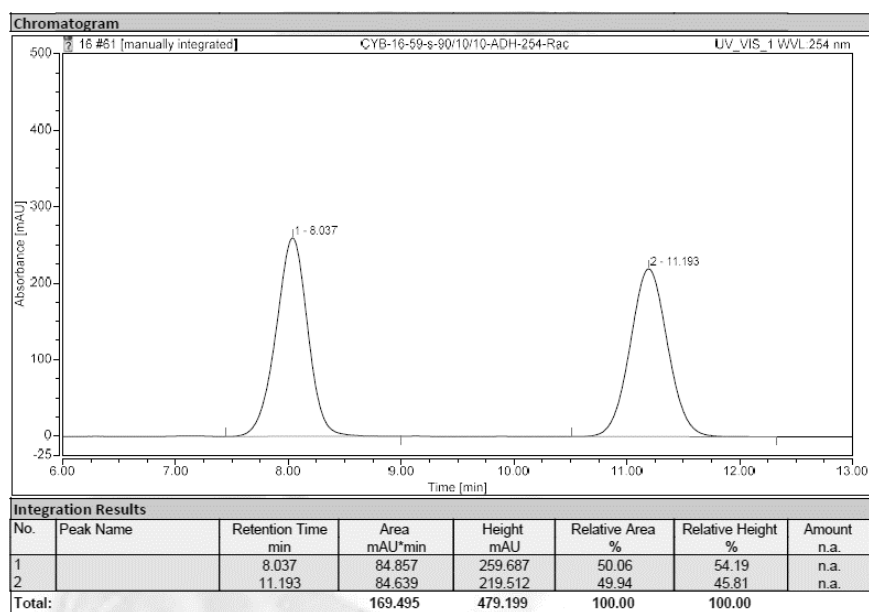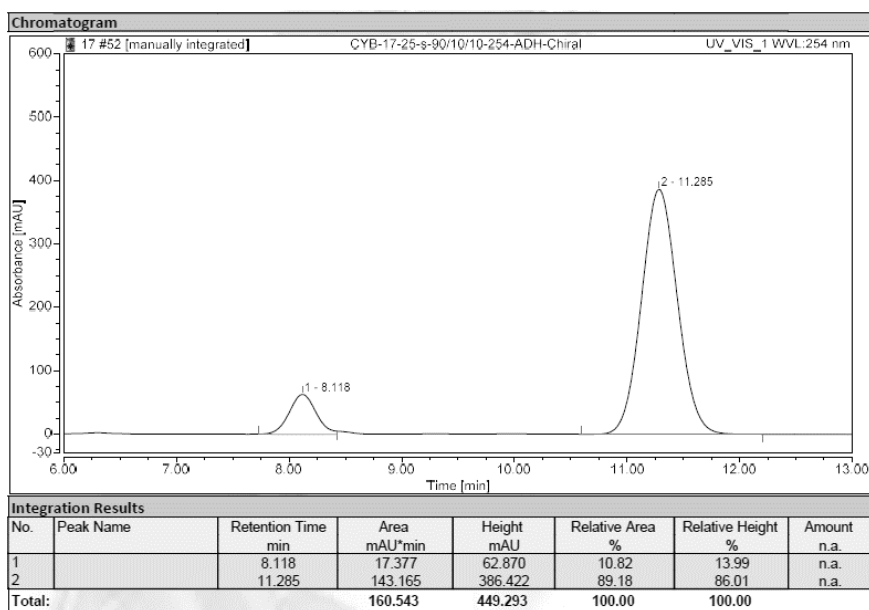

**Supplementary Figure 66.** HPLC spectrum for compound (+)-1aa

(-)-2aa: ADH, *i*-PrOH/hexane = 40/60,  $v = 1.0$  mL/min,  $\lambda = 254$  nm

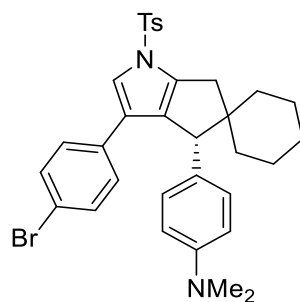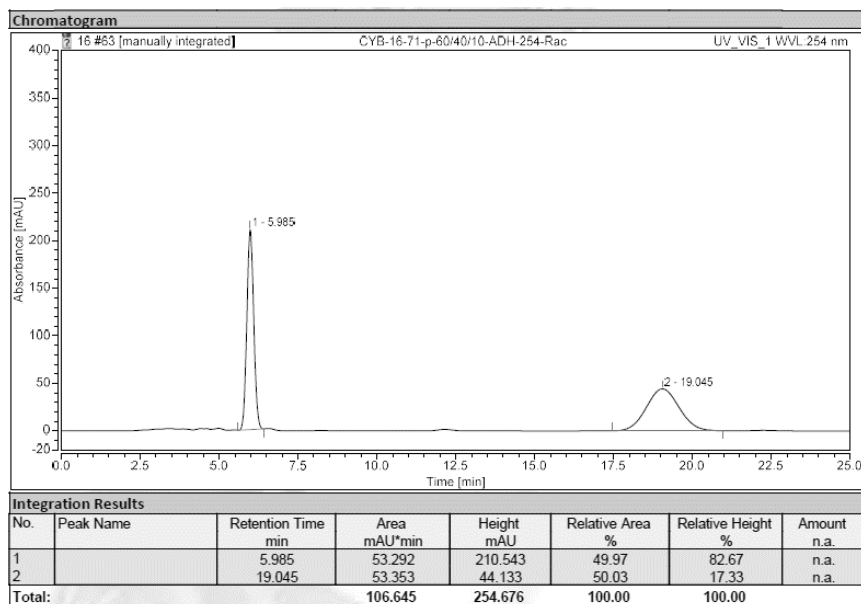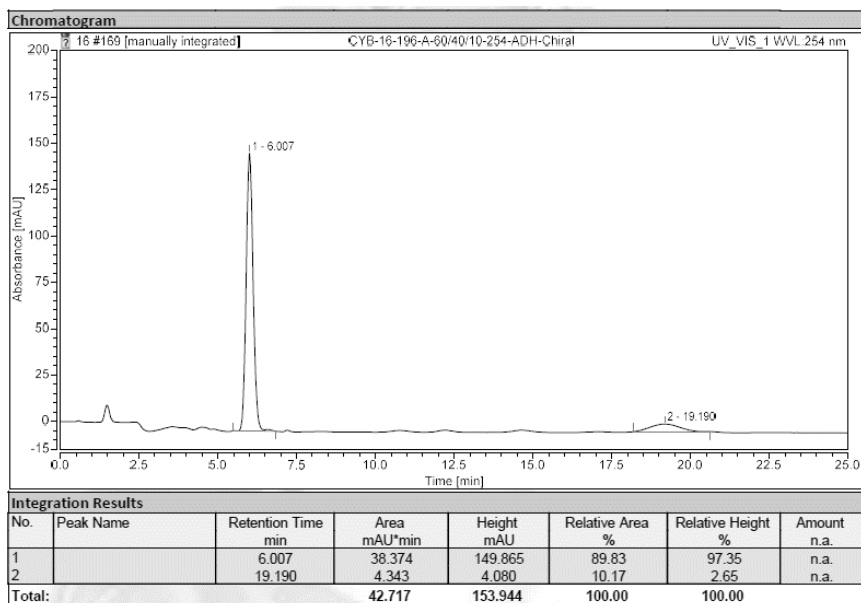

**Supplementary Figure 67.** HPLC spectrum for compound (-)-2aa

(+)-**1ab**: ADH, *i*-PrOH/hexane = 10/90,  $v = 1.0$  mL/min,  $\lambda = 254$  nm

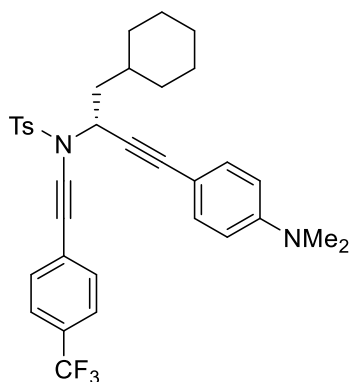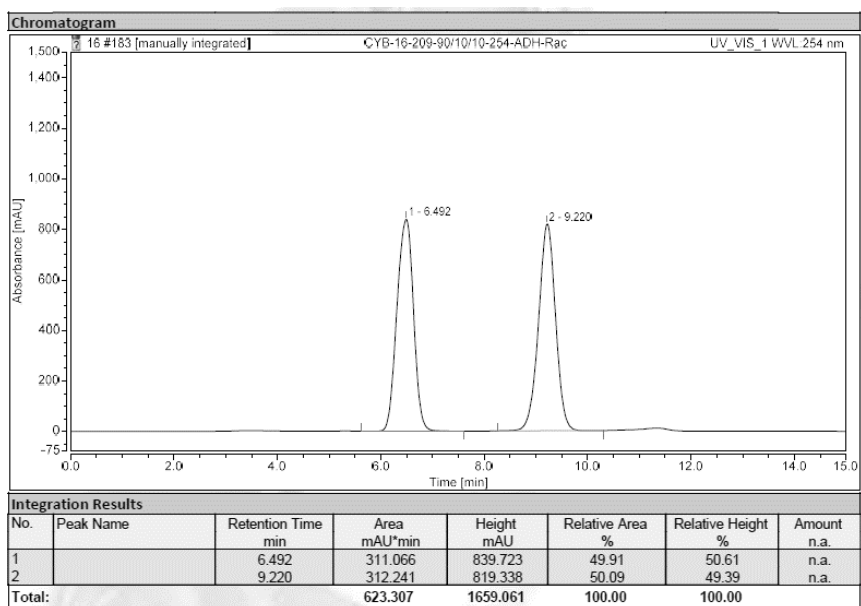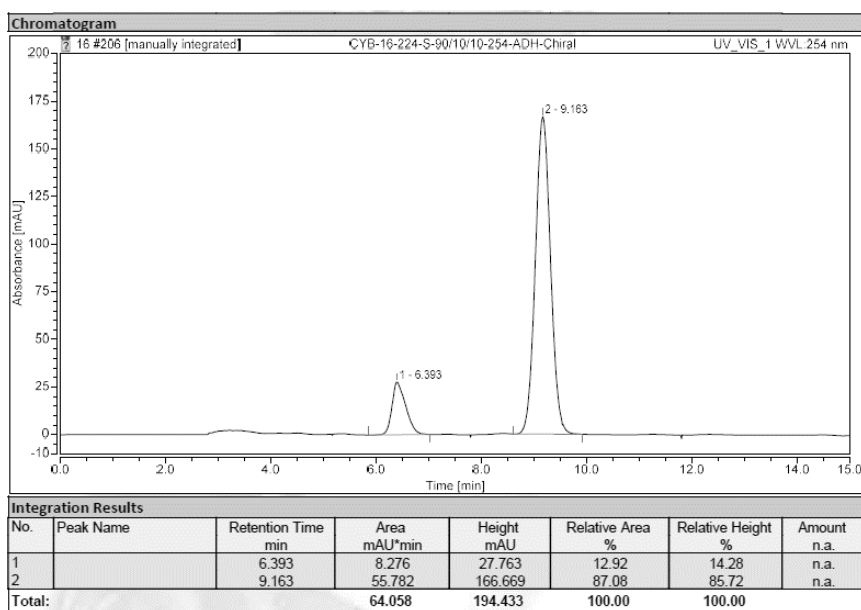

**Supplementary Figure 68.** HPLC spectrum for compound (+)-**1ab**



(-)-2ab: ADH, *i*-PrOH/hexane = 40/60,  $v = 1.0$  mL/min,  $\lambda = 254$  nm

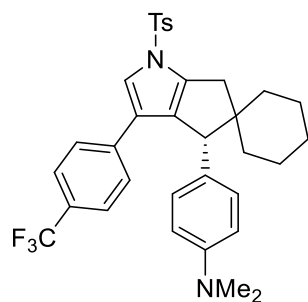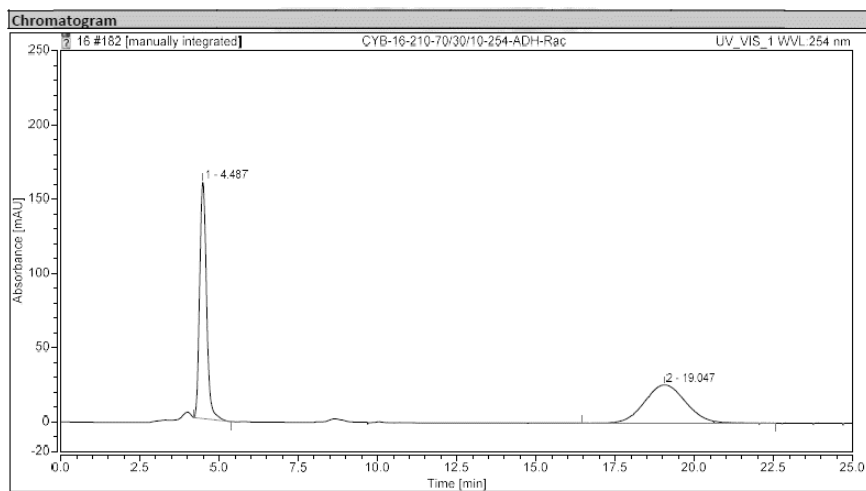

**Integration Results**

| No.           | Peak Name | Retention Time<br>min | Area<br>mAU*min | Height<br>mAU  | Relative Area<br>% | Relative Height<br>% | Amount |
|---------------|-----------|-----------------------|-----------------|----------------|--------------------|----------------------|--------|
| 1             |           | 4.487                 | 39.766          | 159.393        | 50.46              | 86.06                | n.a.   |
| 2             |           | 19.047                | 39.044          | 25.810         | 49.54              | 13.94                | n.a.   |
| <b>Total:</b> |           |                       | <b>78.810</b>   | <b>185.203</b> | <b>100.00</b>      | <b>100.00</b>        |        |

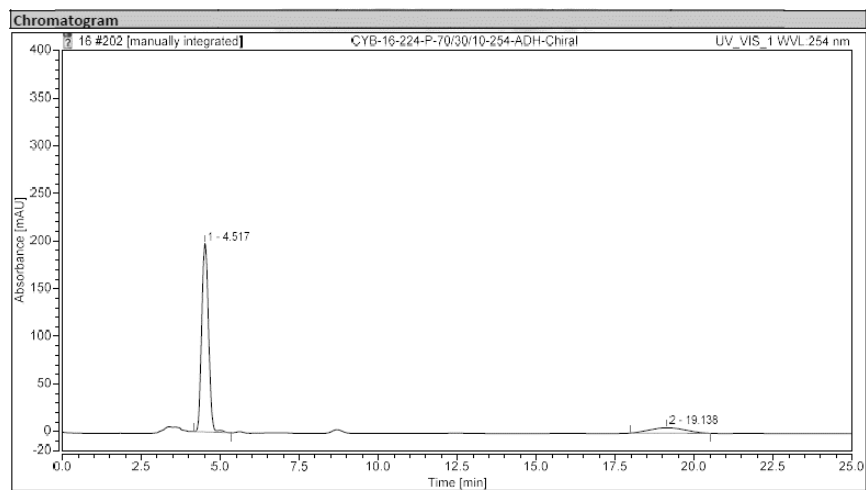

**Integration Results**

| No.           | Peak Name | Retention Time<br>min | Area<br>mAU*min | Height<br>mAU  | Relative Area<br>% | Relative Height<br>% | Amount |
|---------------|-----------|-----------------------|-----------------|----------------|--------------------|----------------------|--------|
| 1             |           | 4.517                 | 49.330          | 197.880        | 87.02              | 97.21                | n.a.   |
| 2             |           | 19.138                | 7.357           | 5.674          | 12.98              | 2.79                 | n.a.   |
| <b>Total:</b> |           |                       | <b>56.687</b>   | <b>203.554</b> | <b>100.00</b>      | <b>100.00</b>        |        |

**Supplementary Figure 69.** HPLC spectrum for compound (-)-2ab

(+)-**1ac**: **IE**, *i*-PrOH/hexane = 10/90,  $v = 1.0$  mL/min,  $\lambda = 254$  nm

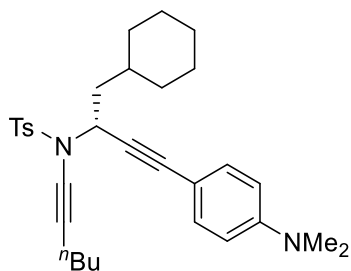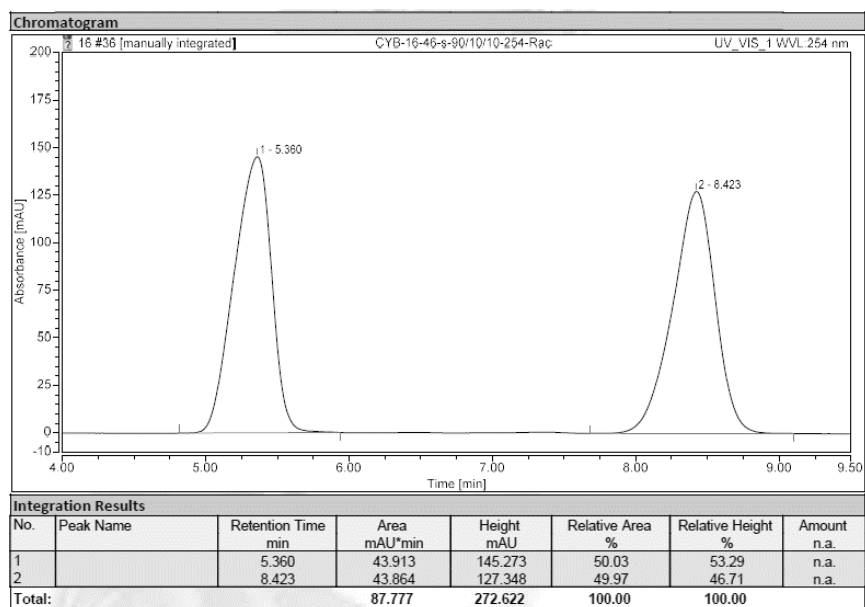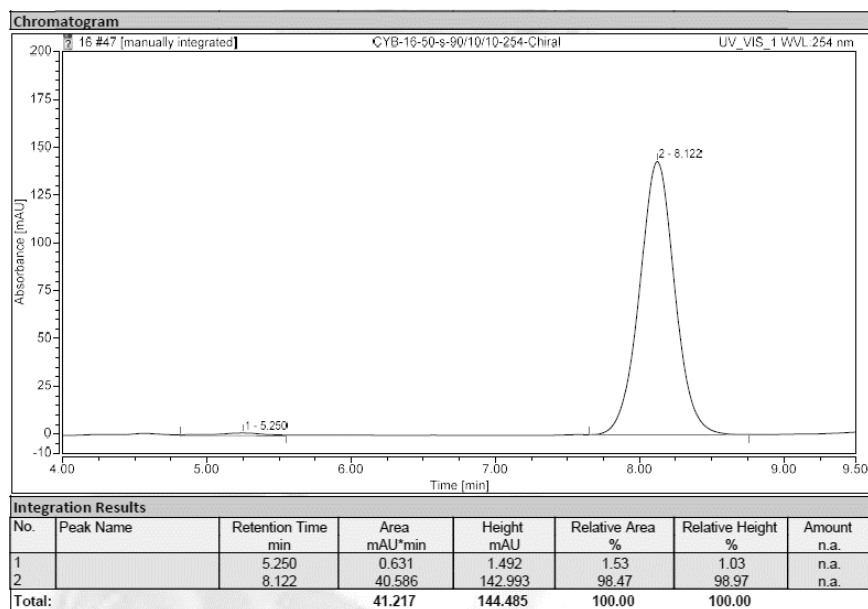

**Supplementary Figure 70.** HPLC spectrum for compound (+)-**1ac**

(-)-2ac: IE, *i*-PrOH/hexane = 2/98,  $v = 1.0$  mL/min,  $\lambda = 254$  nm

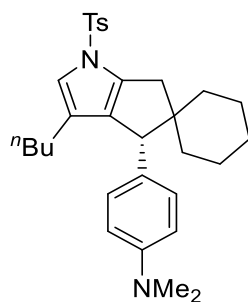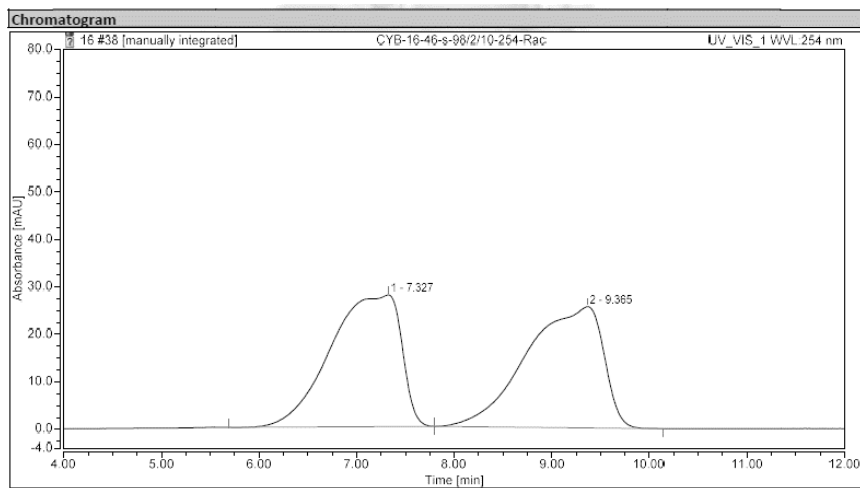

**Integration Results**

| No.           | Peak Name | Retention Time min | Area mAU*min  | Height mAU    | Relative Area % | Relative Height % | Amount |
|---------------|-----------|--------------------|---------------|---------------|-----------------|-------------------|--------|
| 1             |           | 7.327              | 23.331        | 27.752        | 50.05           | 52.06             | n.a.   |
| 2             |           | 9.365              | 23.283        | 25.554        | 49.95           | 47.94             | n.a.   |
| <b>Total:</b> |           |                    | <b>46.614</b> | <b>53.307</b> | <b>100.00</b>   | <b>100.00</b>     |        |

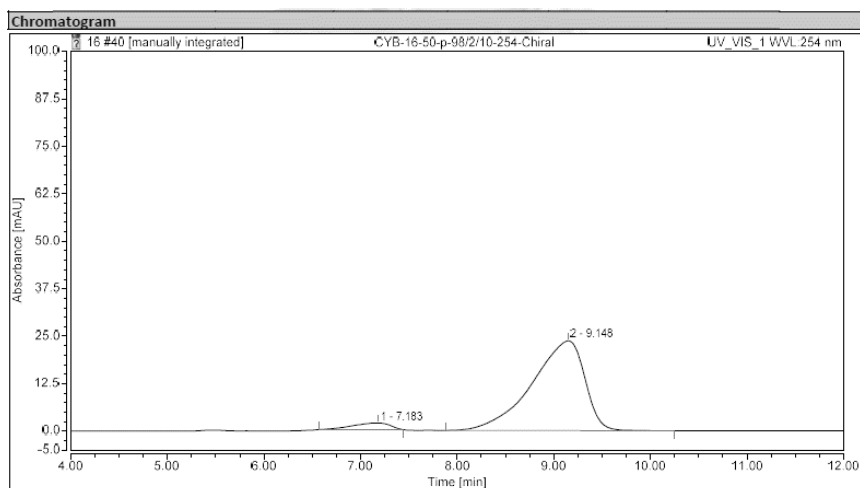

**Integration Results**

| No.           | Peak Name | Retention Time min | Area mAU*min  | Height mAU    | Relative Area % | Relative Height % | Amount |
|---------------|-----------|--------------------|---------------|---------------|-----------------|-------------------|--------|
| 1             |           | 7.183              | 0.794         | 1.756         | 5.02            | 6.91              | n.a.   |
| 2             |           | 9.148              | 15.023        | 23.654        | 94.98           | 93.09             | n.a.   |
| <b>Total:</b> |           |                    | <b>15.817</b> | <b>25.410</b> | <b>100.00</b>   | <b>100.00</b>     |        |

Supplementary Figure 71. HPLC spectrum for compound (-)-2ac

(+)-**1af**: IE, *i*-PrOH/hexane = 3/97,  $\nu$  = 1.0 mL/min,  $\lambda$  = 254 nm

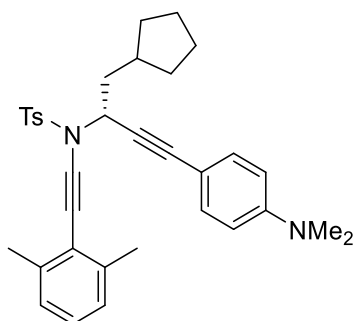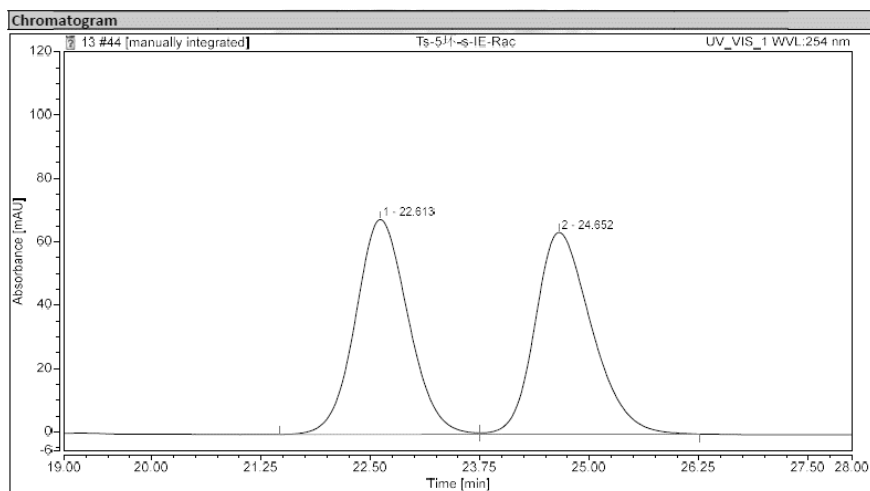

**Integration Results**

| No.           | Peak Name | Retention Time<br>min | Area<br>mAU*min | Height<br>mAU  | Relative Area<br>% | Relative Height<br>% | Amount<br>n.a. |
|---------------|-----------|-----------------------|-----------------|----------------|--------------------|----------------------|----------------|
| 1             |           | 22.613                | 47.268          | 67.782         | 49.90              | 51.57                | n.a.           |
| 2             |           | 24.652                | 47.467          | 63.650         | 50.10              | 48.43                | n.a.           |
| <b>Total:</b> |           |                       | <b>94.736</b>   | <b>131.432</b> | <b>100.00</b>      | <b>100.00</b>        |                |

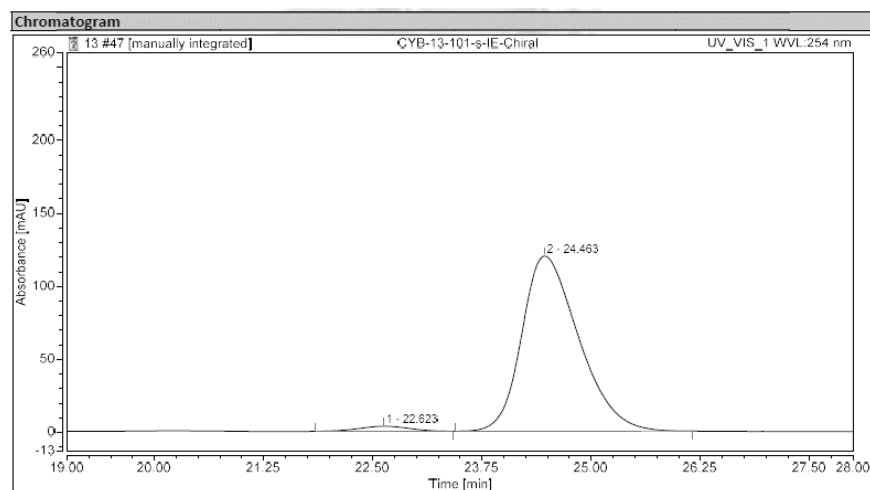

**Integration Results**

| No.           | Peak Name | Retention Time<br>min | Area<br>mAU*min | Height<br>mAU  | Relative Area<br>% | Relative Height<br>% | Amount<br>n.a. |
|---------------|-----------|-----------------------|-----------------|----------------|--------------------|----------------------|----------------|
| 1             |           | 22.623                | 2.302           | 3.476          | 2.47               | 2.81                 | n.a.           |
| 2             |           | 24.463                | 90.876          | 120.025        | 97.53              | 97.19                | n.a.           |
| <b>Total:</b> |           |                       | <b>93.178</b>   | <b>123.500</b> | <b>100.00</b>      | <b>100.00</b>        |                |

**Supplementary Figure 72.** HPLC spectrum for compound (+)-**1af**

(-)-2af: **IE**, *i*-PrOH/hexane = 3/97,  $v = 1.0$  mL/min,  $\lambda = 254$  nm

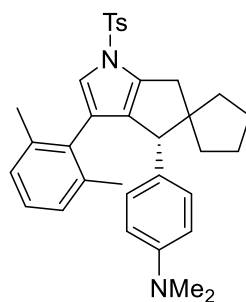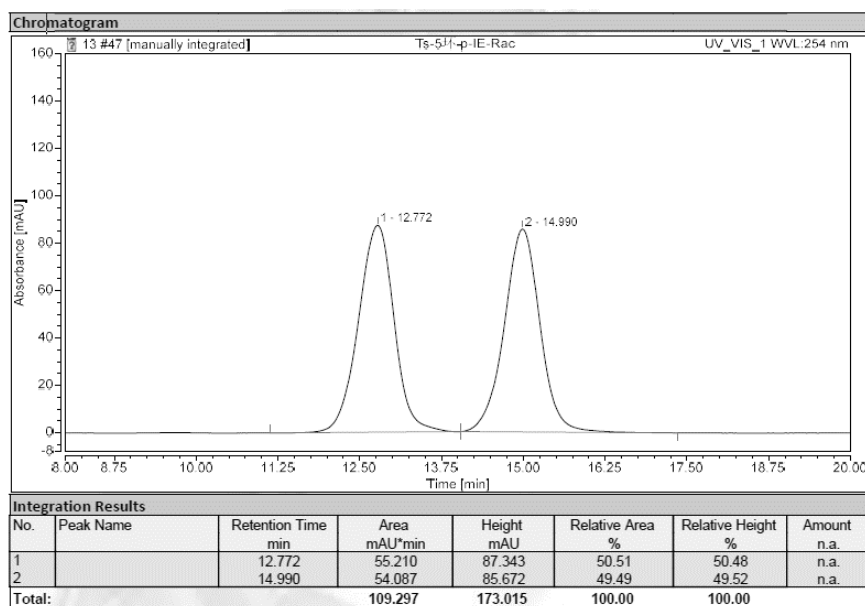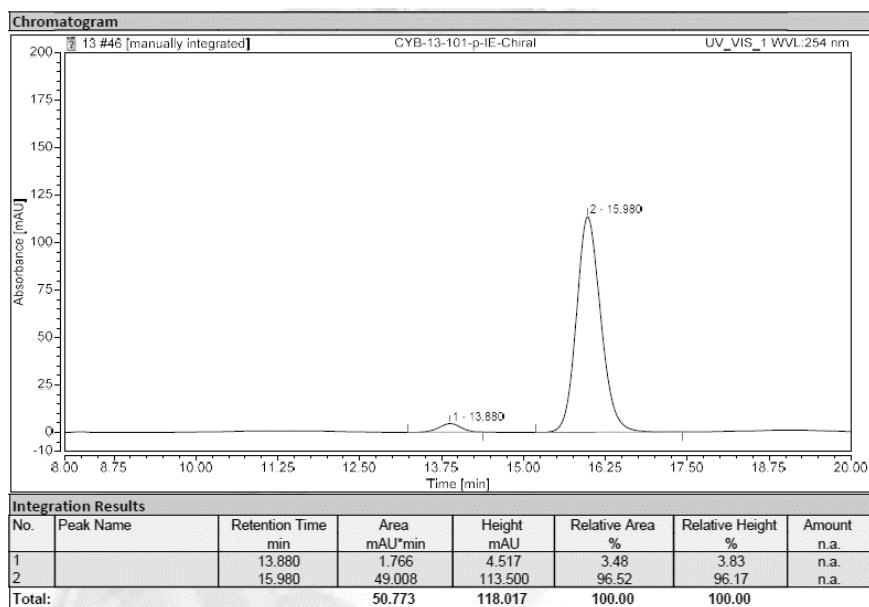

**Supplementary Figure 73.** HPLC spectrum for compound (-)-2af

(+)-**1ag**: **IE**, *i*-PrOH/hexane = 10/90,  $v = 1.0$  mL/min,  $\lambda = 254$  nm

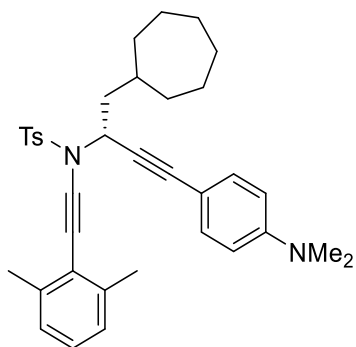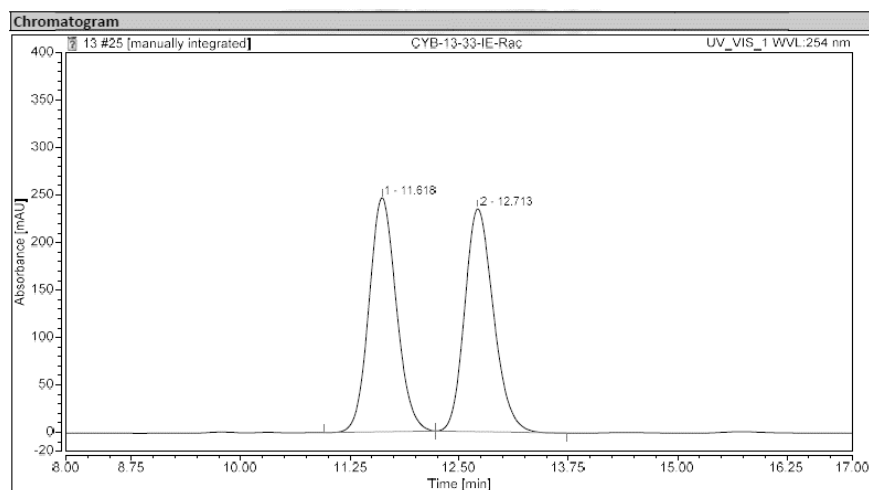

**Integration Results**

| No.           | Peak Name | Retention Time<br>min | Area<br>mAU*min | Height<br>mAU  | Relative Area<br>% | Relative Height<br>% | Amount<br>n.a. |
|---------------|-----------|-----------------------|-----------------|----------------|--------------------|----------------------|----------------|
| 1             |           | 11.618                | 89.441          | 246.480        | 49.93              | 51.19                | n.a.           |
| 2             |           | 12.713                | 89.680          | 235.021        | 50.07              | 48.81                | n.a.           |
| <b>Total:</b> |           |                       | <b>179.121</b>  | <b>481.501</b> | <b>100.00</b>      | <b>100.00</b>        |                |

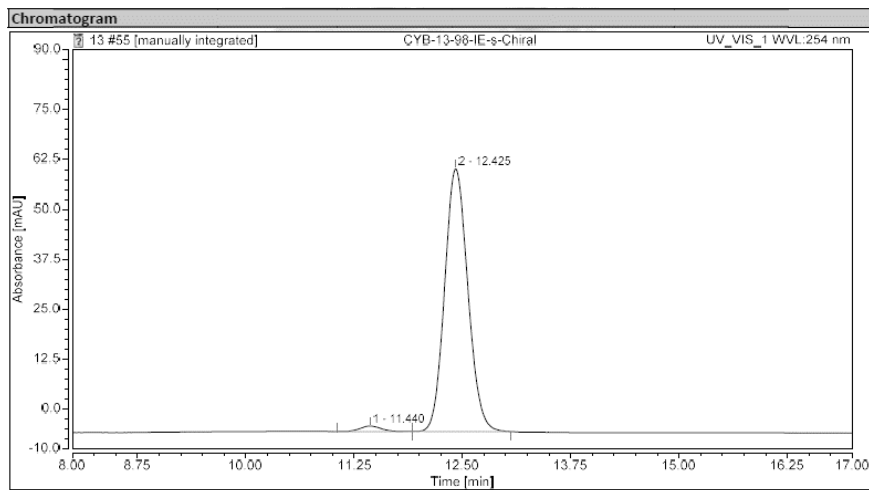

**Integration Results**

| No.           | Peak Name | Retention Time<br>min | Area<br>mAU*min | Height<br>mAU | Relative Area<br>% | Relative Height<br>% | Amount<br>n.a. |
|---------------|-----------|-----------------------|-----------------|---------------|--------------------|----------------------|----------------|
| 1             |           | 11.440                | 0.396           | 1.387         | 1.90               | 2.06                 | n.a.           |
| 2             |           | 12.425                | 20.448          | 65.847        | 98.10              | 97.94                | n.a.           |
| <b>Total:</b> |           |                       | <b>20.844</b>   | <b>67.234</b> | <b>100.00</b>      | <b>100.00</b>        |                |

**Supplementary Figure 74.** HPLC spectrum for compound (+)-**1ag**

(-)-2ag: IE, *i*-PrOH/hexane = 2/98,  $v = 1.0$  mL/min,  $\lambda = 254$  nm

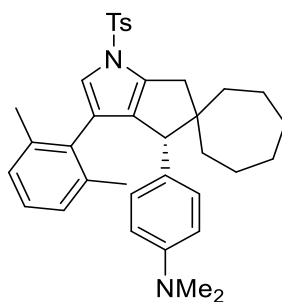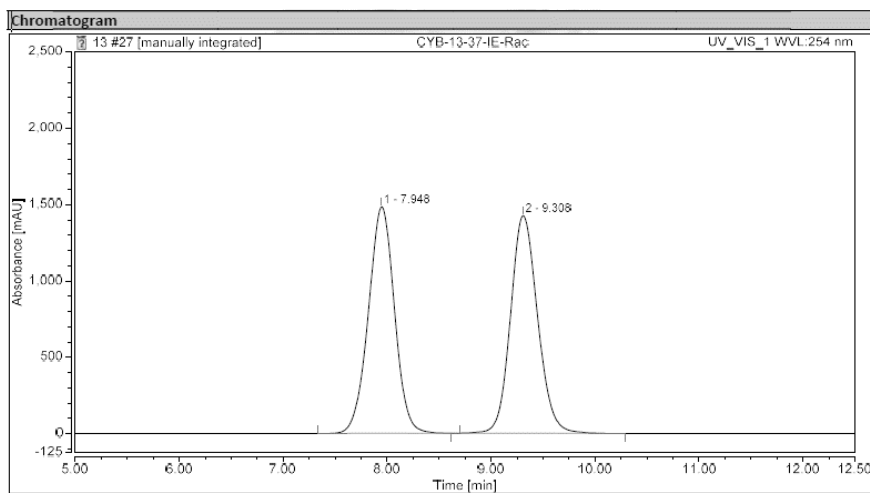

**Integration Results**

| No.           | Peak Name | Retention Time<br>min | Area<br>mAU*min | Height<br>mAU   | Relative Area<br>% | Relative Height<br>% | Amount |
|---------------|-----------|-----------------------|-----------------|-----------------|--------------------|----------------------|--------|
| 1             |           | 7.948                 | 431.316         | 1484.606        | 50.06              | 51.01                | n.a.   |
| 2             |           | 9.308                 | 430.362         | 1425.697        | 49.94              | 48.99                | n.a.   |
| <b>Total:</b> |           |                       | <b>861.678</b>  | <b>2910.303</b> | <b>100.00</b>      | <b>100.00</b>        |        |

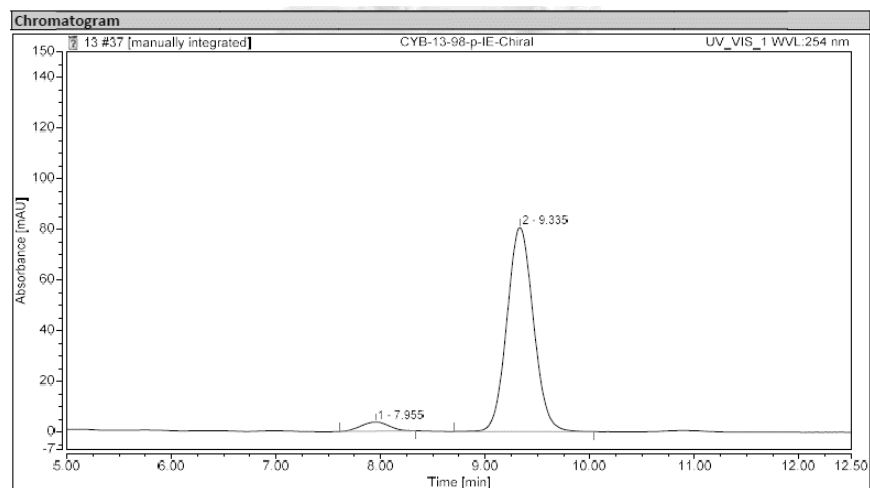

**Integration Results**

| No.           | Peak Name | Retention Time<br>min | Area<br>mAU*min | Height<br>mAU | Relative Area<br>% | Relative Height<br>% | Amount |
|---------------|-----------|-----------------------|-----------------|---------------|--------------------|----------------------|--------|
| 1             |           | 7.955                 | 1.116           | 3.603         | 4.51               | 4.29                 | n.a.   |
| 2             |           | 9.335                 | 23.611          | 80.430        | 95.49              | 95.71                | n.a.   |
| <b>Total:</b> |           |                       | <b>24.727</b>   | <b>84.033</b> | <b>100.00</b>      | <b>100.00</b>        |        |

**Supplementary Figure 75.** HPLC spectrum for compound (-)-2ag

(+)-**1ah**: IE, *i*-PrOH/hexane = 10/90,  $v = 1.0$  mL/min,  $\lambda = 254$  nm

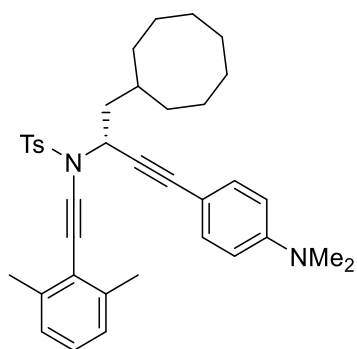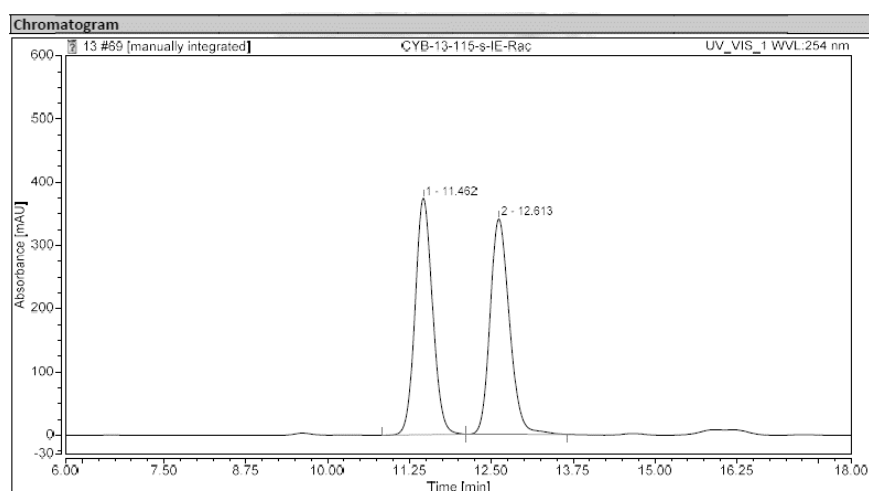

**Integration Results**

| No.           | Peak Name | Retention Time min | Area mAU*min   | Height mAU     | Relative Area % | Relative Height % | Amount n.a. |
|---------------|-----------|--------------------|----------------|----------------|-----------------|-------------------|-------------|
| 1             |           | 11.462             | 115.638        | 374.184        | 49.74           | 52.34             | n.a.        |
| 2             |           | 12.613             | 116.849        | 340.746        | 50.26           | 47.66             | n.a.        |
| <b>Total:</b> |           |                    | <b>232.488</b> | <b>714.929</b> | <b>100.00</b>   | <b>100.00</b>     |             |

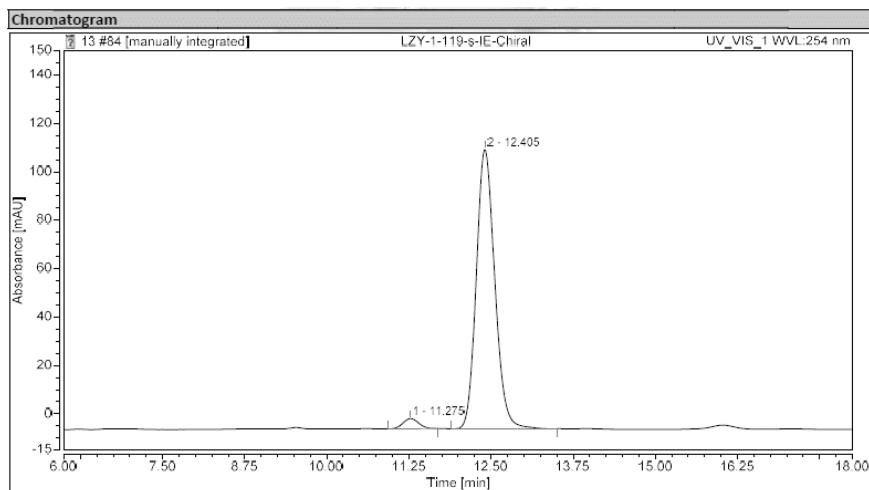

**Integration Results**

| No.           | Peak Name | Retention Time min | Area mAU*min  | Height mAU     | Relative Area % | Relative Height % | Amount n.a. |
|---------------|-----------|--------------------|---------------|----------------|-----------------|-------------------|-------------|
| 1             |           | 11.275             | 1.163         | 4.201          | 3.00            | 3.51              | n.a.        |
| 2             |           | 12.405             | 37.588        | 115.530        | 97.00           | 96.49             | n.a.        |
| <b>Total:</b> |           |                    | <b>38.750</b> | <b>119.732</b> | <b>100.00</b>   | <b>100.00</b>     |             |

**Supplementary Figure 76.** HPLC spectrum for compound (+)-**1ah**



(-)-2ah: IE, *i*-PrOH/hexane = 10/90,  $v = 1.0$  mL/min,  $\lambda = 254$  nm

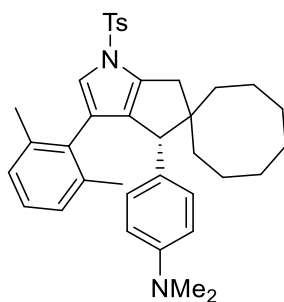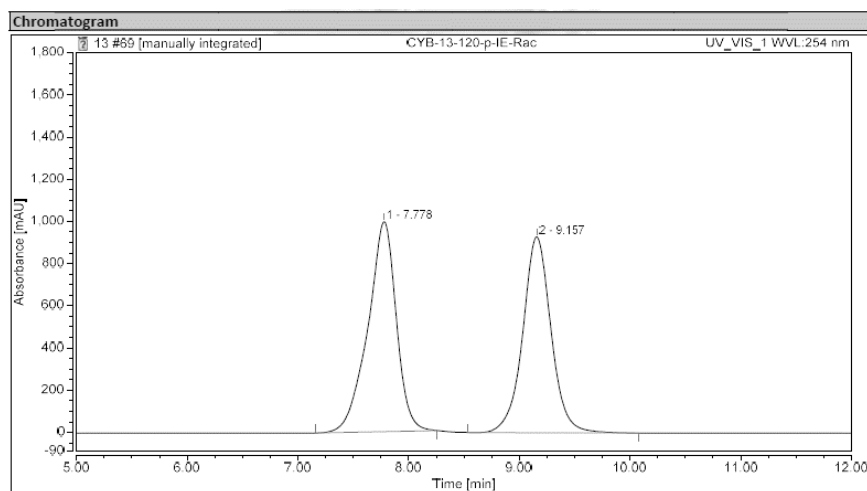

**Integration Results**

| No.           | Peak Name | Retention Time<br>min | Area<br>mAU*min | Height<br>mAU   | Relative Area<br>% | Relative Height<br>% | Amount<br>n.a. |
|---------------|-----------|-----------------------|-----------------|-----------------|--------------------|----------------------|----------------|
| 1             |           | 7.778                 | 296.000         | 995.940         | 51.83              | 51.75                | n.a.           |
| 2             |           | 9.157                 | 275.108         | 928.572         | 48.17              | 48.25                | n.a.           |
| <b>Total:</b> |           |                       | <b>571.108</b>  | <b>1924.512</b> | <b>100.00</b>      | <b>100.00</b>        |                |

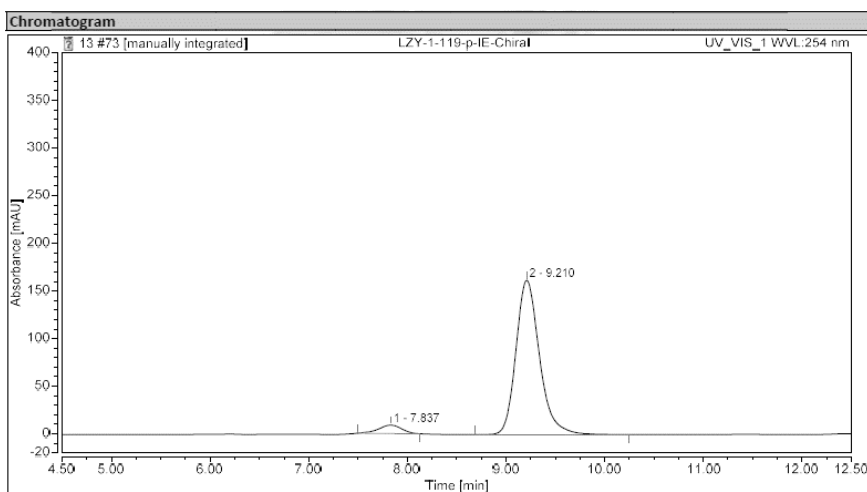

**Integration Results**

| No.           | Peak Name | Retention Time<br>min | Area<br>mAU*min | Height<br>mAU  | Relative Area<br>% | Relative Height<br>% | Amount<br>n.a. |
|---------------|-----------|-----------------------|-----------------|----------------|--------------------|----------------------|----------------|
| 1             |           | 7.837                 | 2.386           | 8.837          | 5.08               | 5.18                 | n.a.           |
| 2             |           | 9.210                 | 44.576          | 161.918        | 94.92              | 94.82                | n.a.           |
| <b>Total:</b> |           |                       | <b>46.962</b>   | <b>170.754</b> | <b>100.00</b>      | <b>100.00</b>        |                |

**Supplementary Figure 77.** HPLC spectrum for compound (-)-2ah

(+)-**1ai**: IE, *i*-PrOH/hexane = 10/90,  $v = 1.0$  mL/min,  $\lambda = 254$  nm

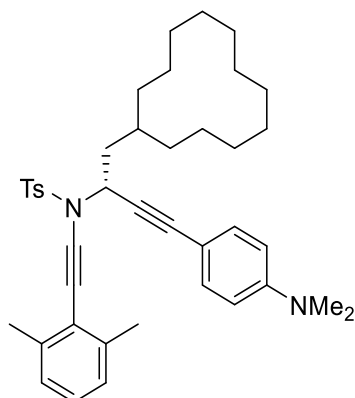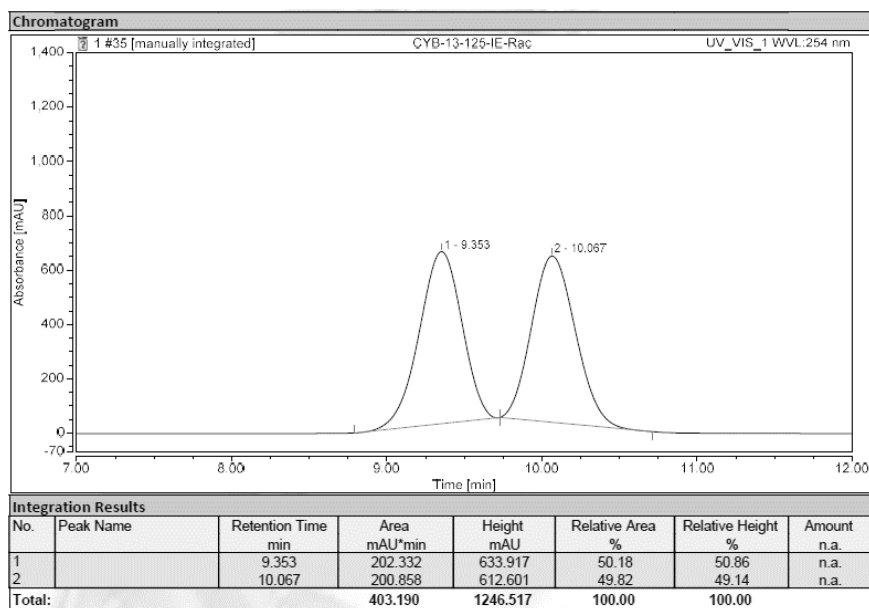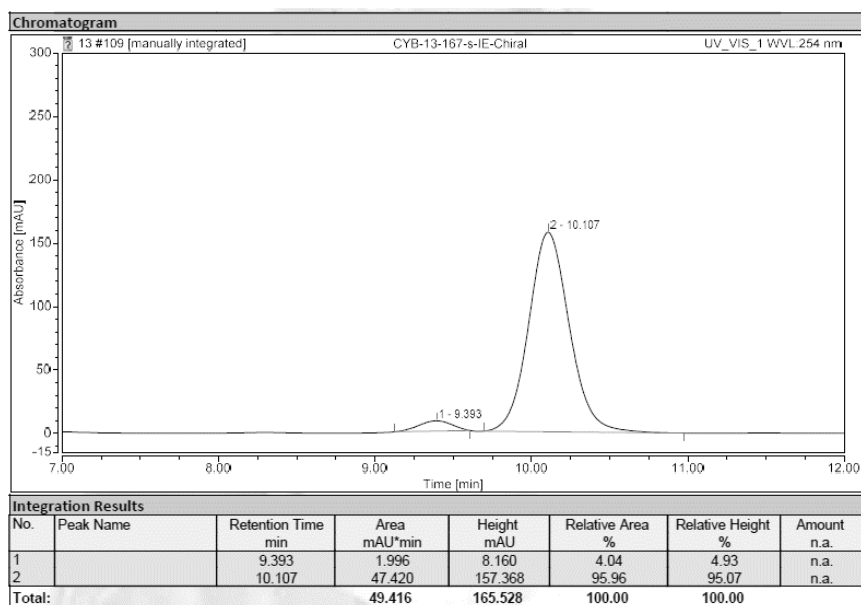

**Supplementary Figure 78.** HPLC spectrum for compound (+)-**1ai**

(-)-2ai: IE, *i*-PrOH/hexane = 10/90,  $v = 1.0$  mL/min,  $\lambda = 254$  nm

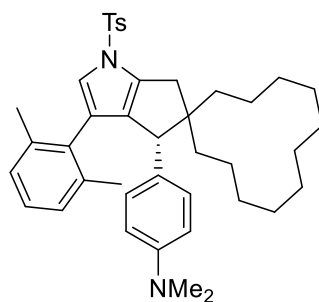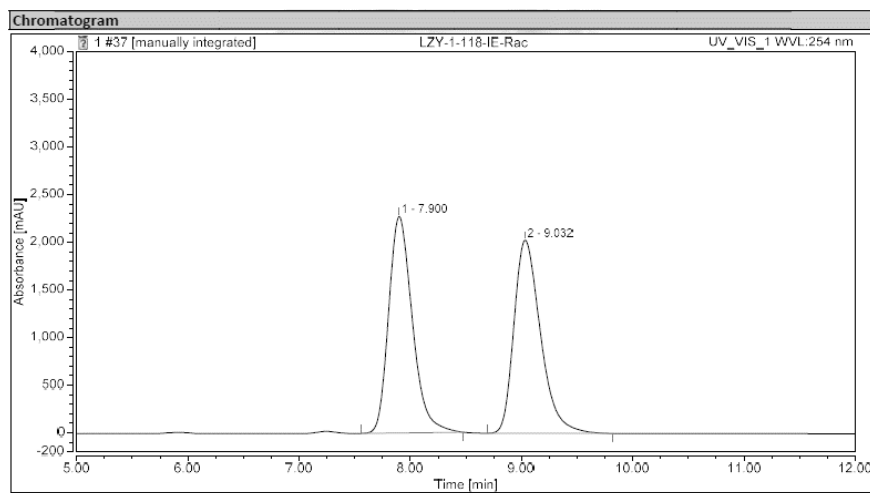

**Integration Results**

| No.           | Peak Name | Retention Time<br>min | Area<br>mAU*min | Height<br>mAU   | Relative Area<br>% | Relative Height<br>% | Amount<br>n.a. |
|---------------|-----------|-----------------------|-----------------|-----------------|--------------------|----------------------|----------------|
| 1             |           | 7.900                 | 561.545         | 2273.685        | 50.03              | 52.87                | n.a.           |
| 2             |           | 9.032                 | 560.923         | 2026.530        | 49.97              | 47.13                | n.a.           |
| <b>Total:</b> |           |                       | <b>1122.469</b> | <b>4300.215</b> | <b>100.00</b>      | <b>100.00</b>        |                |

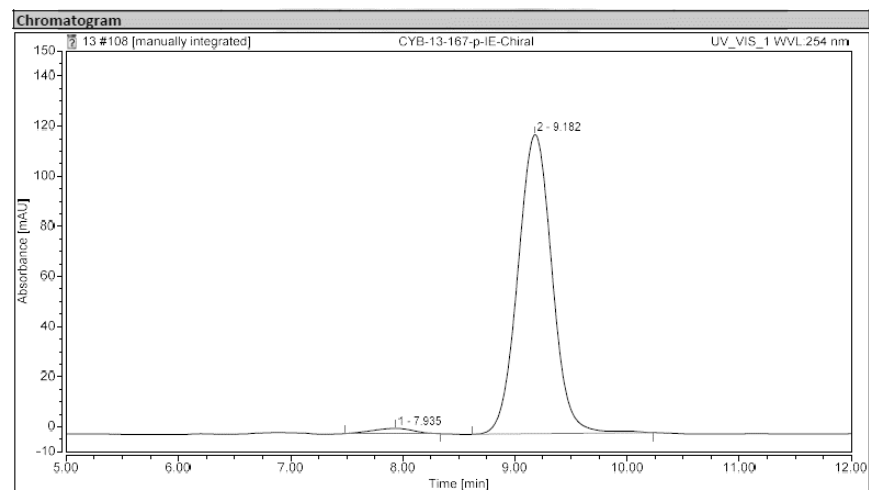

**Integration Results**

| No.           | Peak Name | Retention Time<br>min | Area<br>mAU*min | Height<br>mAU  | Relative Area<br>% | Relative Height<br>% | Amount<br>n.a. |
|---------------|-----------|-----------------------|-----------------|----------------|--------------------|----------------------|----------------|
| 1             |           | 7.935                 | 0.870           | 2.086          | 2.03               | 1.72                 | n.a.           |
| 2             |           | 9.182                 | 42.070          | 119.416        | 97.97              | 98.28                | n.a.           |
| <b>Total:</b> |           |                       | <b>42.940</b>   | <b>121.502</b> | <b>100.00</b>      | <b>100.00</b>        |                |

**Supplementary Figure 79.** HPLC spectrum for compound (-)-2ai

(+)-**1aj**: IE, *i*-PrOH/hexane = 2/98,  $\nu$  = 1.0 mL/min,  $\lambda$  = 254 nm

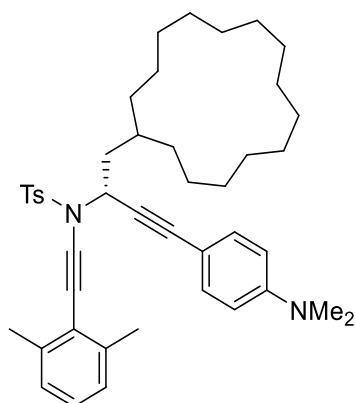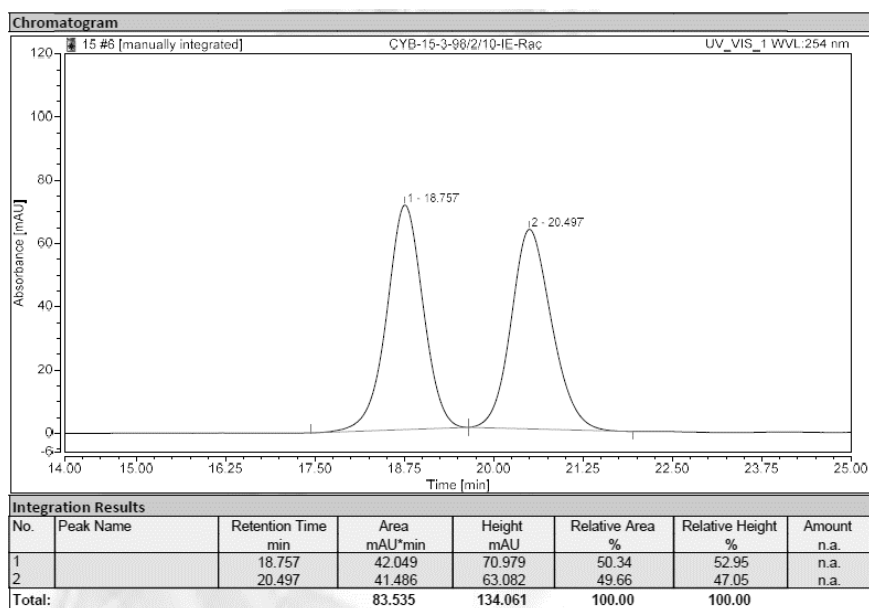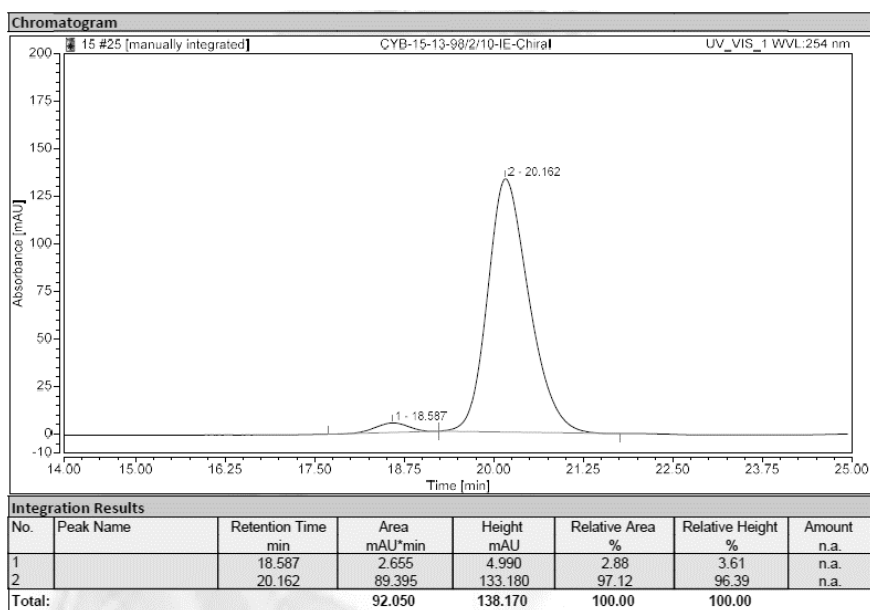

Supplementary Figure 80. HPLC spectrum for compound (+)-**1aj**

(-)-2aj: IE, *i*-PrOH/hexane = 5/95,  $v = 1.0$  mL/min,  $\lambda = 254$  nm

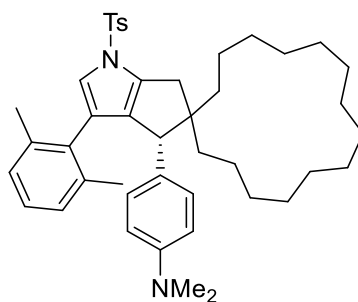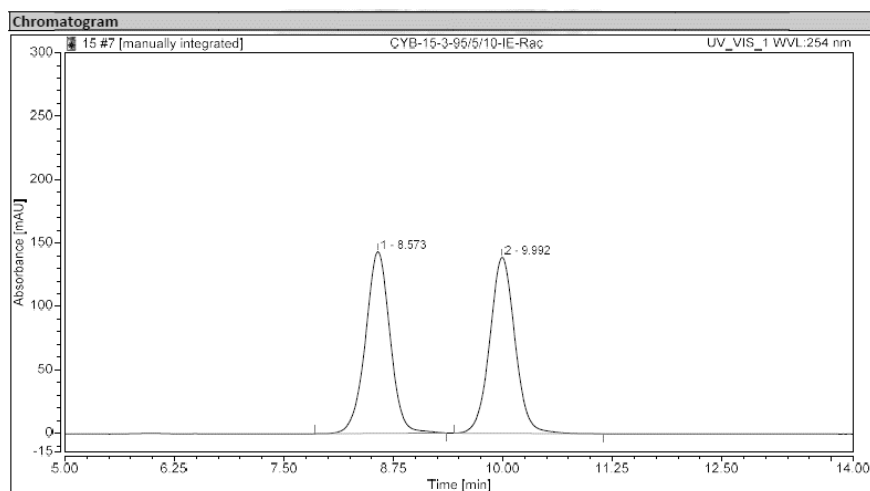

**Integration Results**

| No.           | Peak Name | Retention Time min | Area mAU*min  | Height mAU     | Relative Area % | Relative Height % | Amount |
|---------------|-----------|--------------------|---------------|----------------|-----------------|-------------------|--------|
| 1             |           | 8.573              | 46.727        | 143.412        | 50.24           | 50.80             | n.a.   |
| 2             |           | 9.992              | 46.285        | 138.892        | 49.76           | 49.20             | n.a.   |
| <b>Total:</b> |           |                    | <b>93.012</b> | <b>282.305</b> | <b>100.00</b>   | <b>100.00</b>     |        |

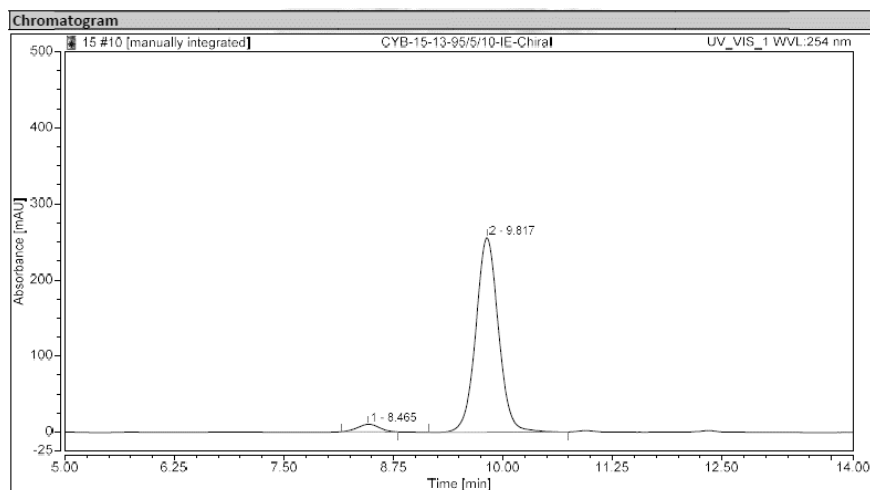

**Integration Results**

| No.           | Peak Name | Retention Time min | Area mAU*min  | Height mAU     | Relative Area % | Relative Height % | Amount |
|---------------|-----------|--------------------|---------------|----------------|-----------------|-------------------|--------|
| 1             |           | 8.465              | 2.808         | 9.866          | 3.53            | 3.71              | n.a.   |
| 2             |           | 9.817              | 76.619        | 255.728        | 96.47           | 96.29             | n.a.   |
| <b>Total:</b> |           |                    | <b>79.427</b> | <b>265.595</b> | <b>100.00</b>   | <b>100.00</b>     |        |

**Supplementary Figure 81.** HPLC spectrum for compound (-)-2aj

(+)-**1ak**: IE, *i*-PrOH/hexane = 30/70,  $v = 1.0$  mL/min,  $\lambda = 254$  nm

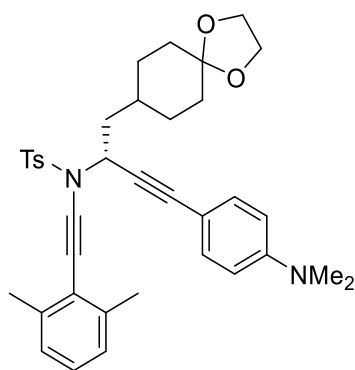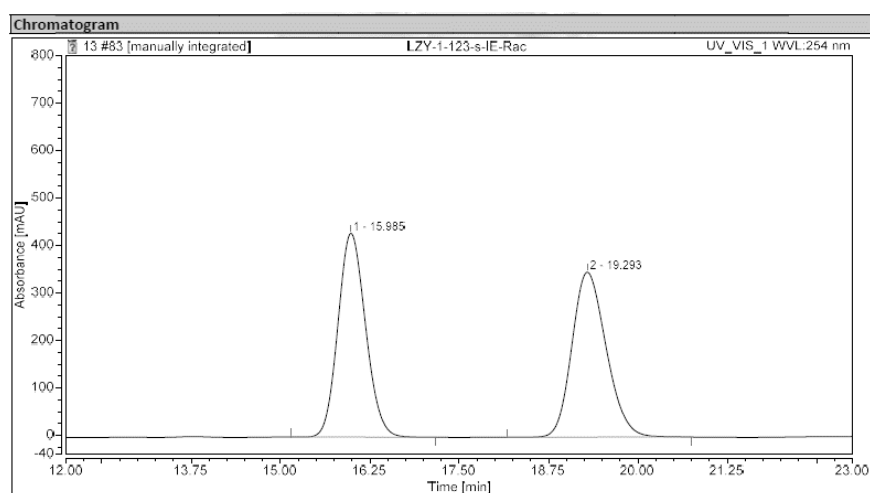

| No.           | Peak Name | Retention Time<br>min | Area<br>mAU*min | Height<br>mAU  | Relative Area<br>% | Relative Height<br>% | Amount<br>n.a. |
|---------------|-----------|-----------------------|-----------------|----------------|--------------------|----------------------|----------------|
| 1             |           | 15.985                | 192.194         | 429.545        | 49.88              | 55.28                | n.a.           |
| 2             |           | 19.293                | 193.083         | 347.535        | 50.12              | 44.72                | n.a.           |
| <b>Total:</b> |           |                       | <b>385.277</b>  | <b>777.080</b> | <b>100.00</b>      | <b>100.00</b>        |                |

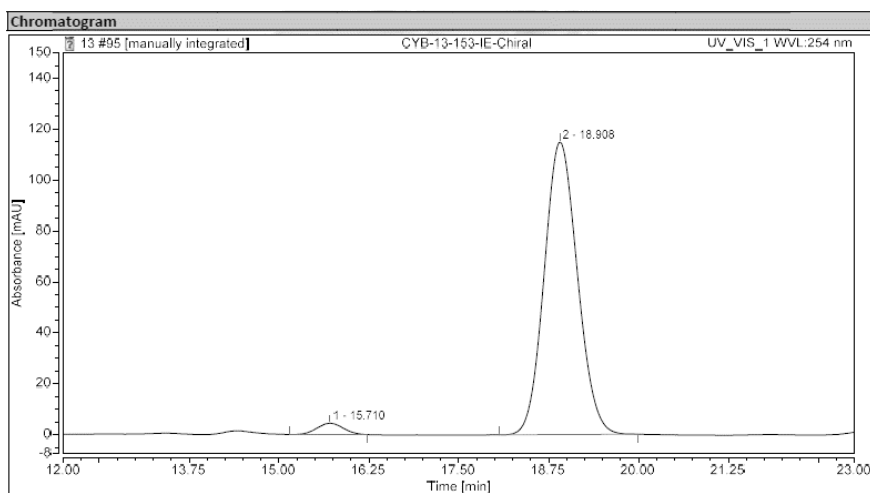

| No.           | Peak Name | Retention Time<br>min | Area<br>mAU*min | Height<br>mAU  | Relative Area<br>% | Relative Height<br>% | Amount<br>n.a. |
|---------------|-----------|-----------------------|-----------------|----------------|--------------------|----------------------|----------------|
| 1             |           | 15.710                | 1.865           | 4.431          | 2.94               | 3.71                 | n.a.           |
| 2             |           | 18.908                | 61.599          | 114.960        | 97.06              | 96.29                | n.a.           |
| <b>Total:</b> |           |                       | <b>63.464</b>   | <b>119.391</b> | <b>100.00</b>      | <b>100.00</b>        |                |

**Supplementary Figure 82.** HPLC spectrum for compound (+)-**1ak**

(-)-2ak: IE, *i*-PrOH/hexane = 30/70,  $v = 1.0$  mL/min,  $\lambda = 254$  nm

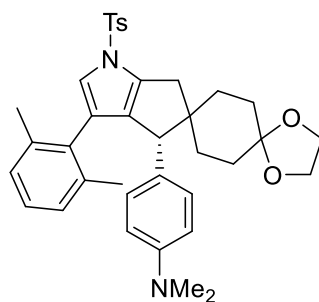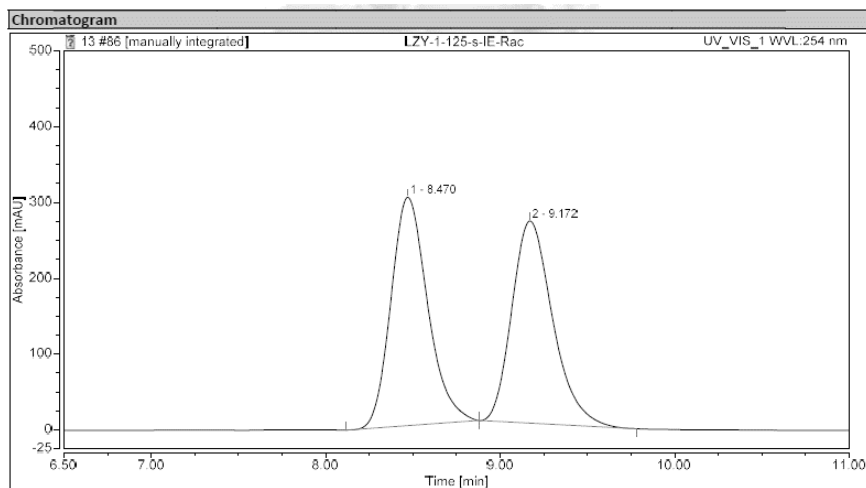

**Integration Results**

| No.           | Peak Name | Retention Time<br>min | Area<br>mAU*min | Height<br>mAU  | Relative Area<br>% | Relative Height<br>% | Amount<br>n.a. |
|---------------|-----------|-----------------------|-----------------|----------------|--------------------|----------------------|----------------|
| 1             |           | 8.470                 | 73.394          | 301.368        | 50.37              | 53.02                | n.a.           |
| 2             |           | 9.172                 | 72.324          | 266.998        | 49.63              | 46.98                | n.a.           |
| <b>Total:</b> |           |                       | <b>145.718</b>  | <b>568.366</b> | <b>100.00</b>      | <b>100.00</b>        |                |

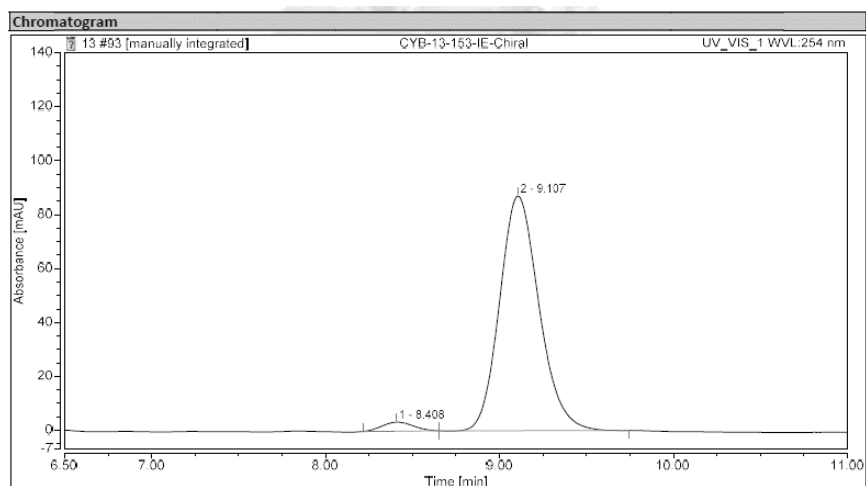

**Integration Results**

| No.           | Peak Name | Retention Time<br>min | Area<br>mAU*min | Height<br>mAU | Relative Area<br>% | Relative Height<br>% | Amount<br>n.a. |
|---------------|-----------|-----------------------|-----------------|---------------|--------------------|----------------------|----------------|
| 1             |           | 8.408                 | 0.699           | 3.367         | 2.96               | 3.73                 | n.a.           |
| 2             |           | 9.107                 | 22.886          | 87.011        | 97.04              | 96.27                | n.a.           |
| <b>Total:</b> |           |                       | <b>23.586</b>   | <b>90.378</b> | <b>100.00</b>      | <b>100.00</b>        |                |

**Supplementary Figure 83.** HPLC spectrum for compound (-)-2ak

(+)-**1al**: IE, *i*-PrOH/hexane = 5/95,  $v = 1.0$  mL/min,  $\lambda = 254$  nm

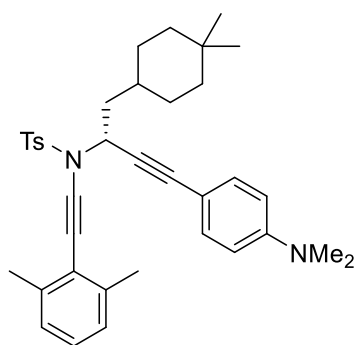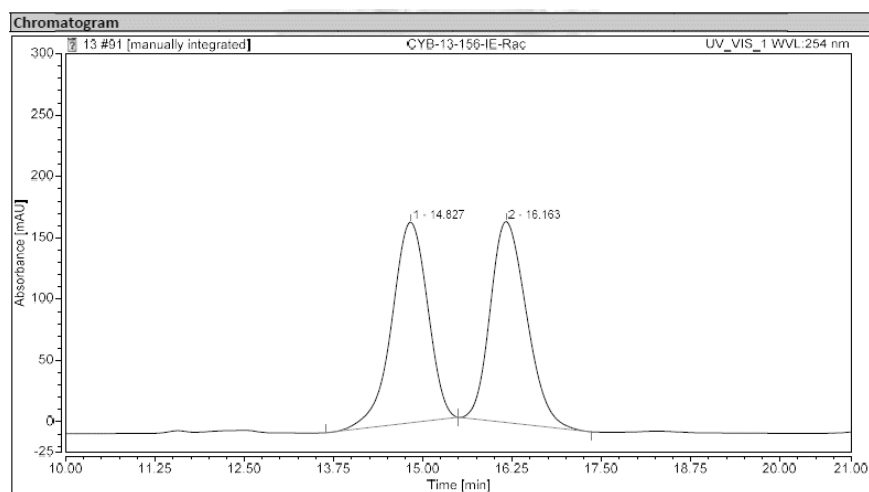

**Integration Results**

| No.           | Peak Name | Retention Time<br>min | Area<br>mAU*min | Height<br>mAU  | Relative Area<br>% | Relative Height<br>% | Amount<br>n.a. |
|---------------|-----------|-----------------------|-----------------|----------------|--------------------|----------------------|----------------|
| 1             |           | 14.827                | 95.322          | 163.538        | 49.64              | 49.96                | n.a.           |
| 2             |           | 16.163                | 96.721          | 163.816        | 50.36              | 50.04                | n.a.           |
| <b>Total:</b> |           |                       | <b>192.044</b>  | <b>327.354</b> | <b>100.00</b>      | <b>100.00</b>        |                |

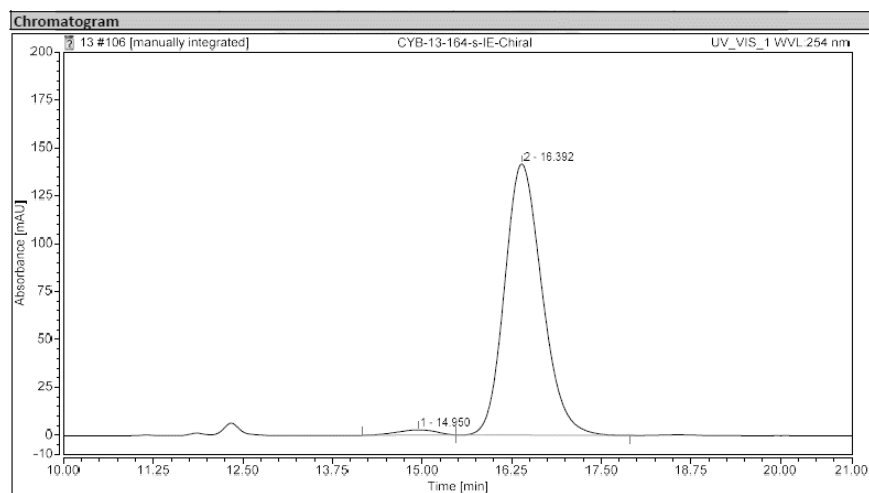

**Integration Results**

| No.           | Peak Name | Retention Time<br>min | Area<br>mAU*min | Height<br>mAU  | Relative Area<br>% | Relative Height<br>% | Amount<br>n.a. |
|---------------|-----------|-----------------------|-----------------|----------------|--------------------|----------------------|----------------|
| 1             |           | 14.950                | 1.743           | 2.725          | 1.99               | 1.89                 | n.a.           |
| 2             |           | 16.392                | 85.745          | 141.536        | 98.01              | 98.11                | n.a.           |
| <b>Total:</b> |           |                       | <b>87.488</b>   | <b>144.261</b> | <b>100.00</b>      | <b>100.00</b>        |                |

**Supplementary Figure 84.** HPLC spectrum for compound (+)-**1al**



(-)-2al: IE, *i*-PrOH/hexane = 5/95,  $v = 1.0$  mL/min,  $\lambda = 254$  nm

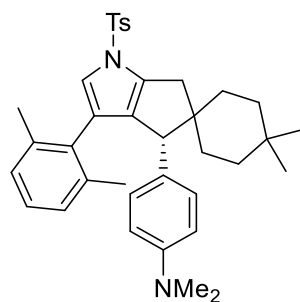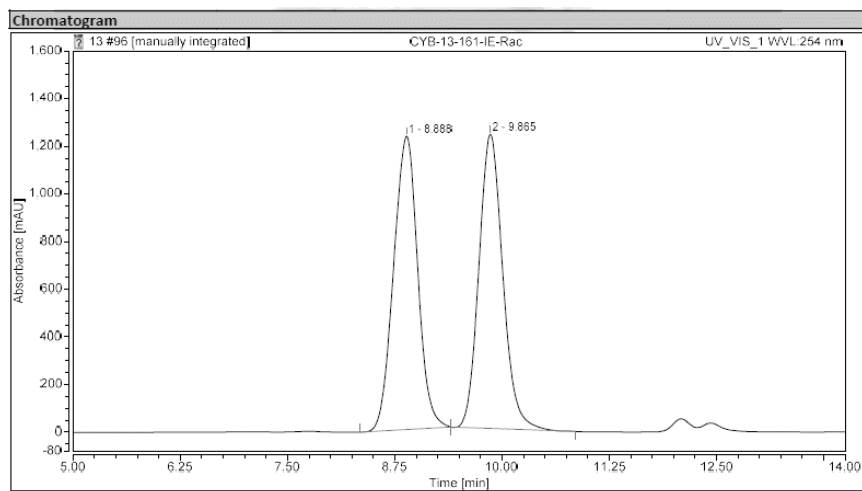

**Integration Results**

| No.           | Peak Name | Retention Time min | Area mAU*min   | Height mAU      | Relative Area % | Relative Height % | Amount |
|---------------|-----------|--------------------|----------------|-----------------|-----------------|-------------------|--------|
| 1             |           | 8.888              | 399.996        | 1232.310        | 50.14           | 49.94             | n.a.   |
| 2             |           | 9.865              | 397.784        | 1235.250        | 49.86           | 50.06             | n.a.   |
| <b>Total:</b> |           |                    | <b>797.780</b> | <b>2467.560</b> | <b>100.00</b>   | <b>100.00</b>     |        |

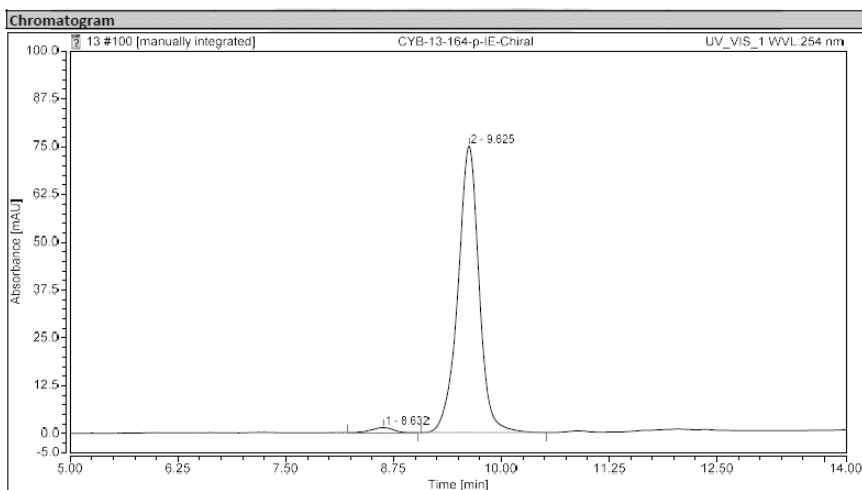

**Integration Results**

| No.           | Peak Name | Retention Time min | Area mAU*min  | Height mAU    | Relative Area % | Relative Height % | Amount |
|---------------|-----------|--------------------|---------------|---------------|-----------------|-------------------|--------|
| 1             |           | 8.632              | 0.397         | 1.356         | 1.83            | 1.78              | n.a.   |
| 2             |           | 9.625              | 21.302        | 74.954        | 98.17           | 98.22             | n.a.   |
| <b>Total:</b> |           |                    | <b>21.699</b> | <b>76.310</b> | <b>100.00</b>   | <b>100.00</b>     |        |

**Supplementary Figure 85.** HPLC spectrum for compound (-)-2al

(+)-**1am**: IE, *i*-PrOH/hexane = 3/97,  $v = 1.0$  mL/min,  $\lambda = 254$  nm

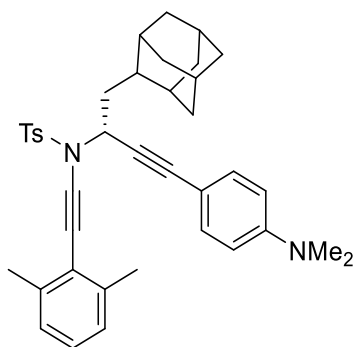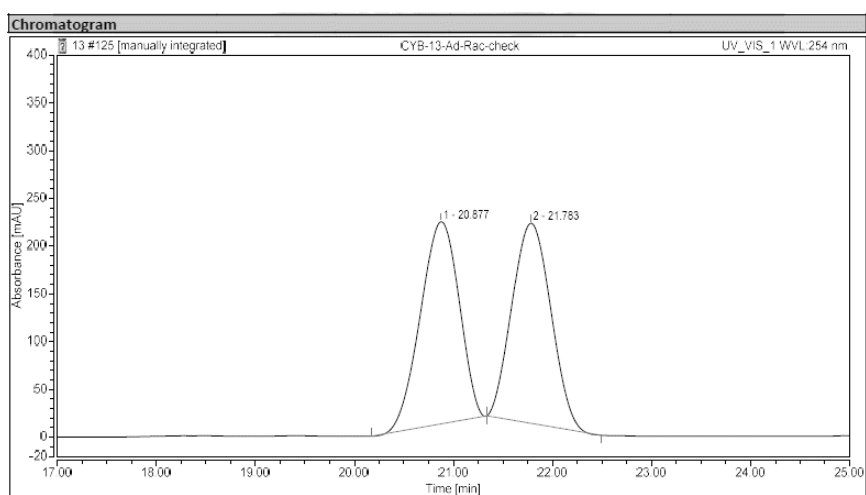

**Integration Results**

| No.           | Peak Name | Retention Time min | Area mAU*min   | Height mAU     | Relative Area % | Relative Height % | Amount |
|---------------|-----------|--------------------|----------------|----------------|-----------------|-------------------|--------|
| 1             |           | 20.877             | 95.488         | 211.672        | 50.08           | 50.26             | n.a.   |
| 2             |           | 21.783             | 95.185         | 209.461        | 49.92           | 49.74             | n.a.   |
| <b>Total:</b> |           |                    | <b>190.673</b> | <b>421.153</b> | <b>100.00</b>   | <b>100.00</b>     |        |

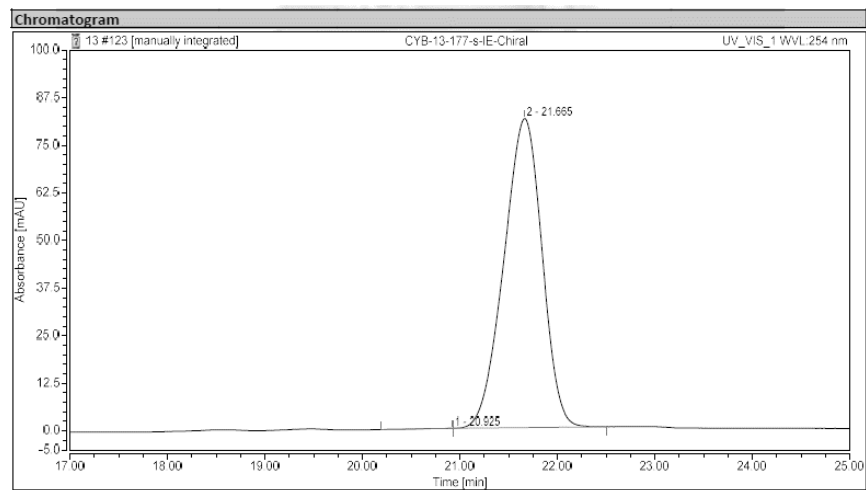

**Integration Results**

| No.           | Peak Name | Retention Time min | Area mAU*min  | Height mAU    | Relative Area % | Relative Height % | Amount |
|---------------|-----------|--------------------|---------------|---------------|-----------------|-------------------|--------|
| 1             |           | 20.925             | 0.010         | 0.008         | 0.03            | 0.01              | n.a.   |
| 2             |           | 21.665             | 36.849        | 81.166        | 99.97           | 99.99             | n.a.   |
| <b>Total:</b> |           |                    | <b>36.859</b> | <b>81.173</b> | <b>100.00</b>   | <b>100.00</b>     |        |

Supplementary Figure 86. HPLC spectrum for compound (+)-**1am**

(-)-2am: IE, *i*-PrOH/hexane = 10/90,  $v = 1.0$  mL/min,  $\lambda = 254$  nm

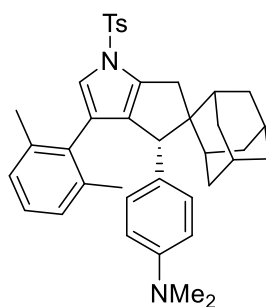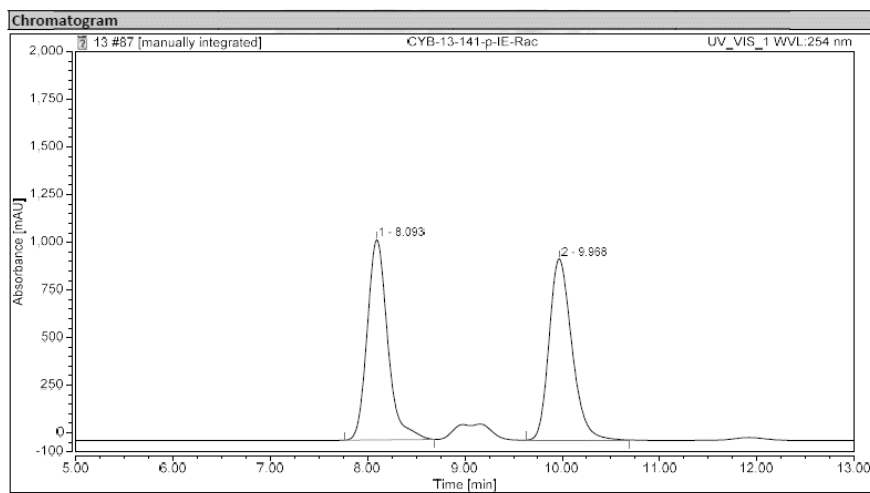

**Integration Results**

| No.           | Peak Name | Retention Time min | Area mAU*min   | Height mAU      | Relative Area % | Relative Height % | Amount |
|---------------|-----------|--------------------|----------------|-----------------|-----------------|-------------------|--------|
| 1             |           | 8.093              | 256.835        | 1050.530        | 49.88           | 52.47             | n.a.   |
| 2             |           | 9.968              | 258.071        | 951.576         | 50.12           | 47.53             | n.a.   |
| <b>Total:</b> |           |                    | <b>514.905</b> | <b>2002.106</b> | <b>100.00</b>   | <b>100.00</b>     |        |

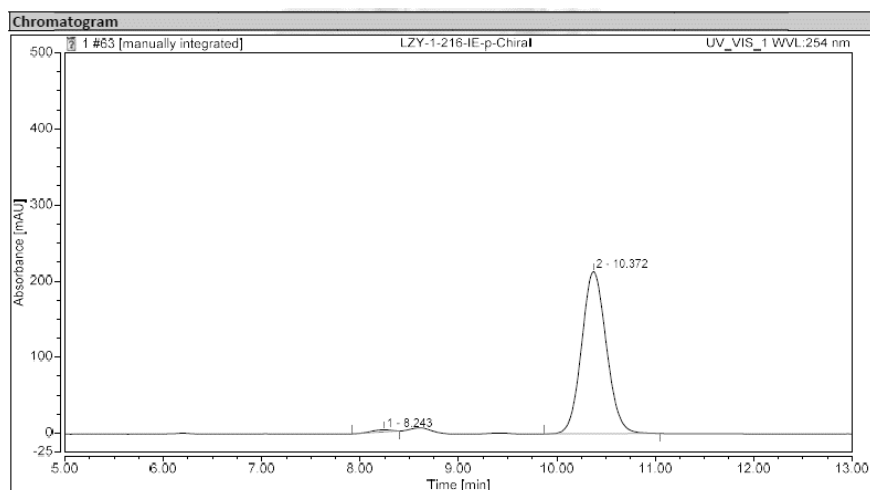

**Integration Results**

| No.           | Peak Name | Retention Time min | Area mAU*min  | Height mAU     | Relative Area % | Relative Height % | Amount |
|---------------|-----------|--------------------|---------------|----------------|-----------------|-------------------|--------|
| 1             |           | 8.243              | 0.653         | 2.779          | 1.04            | 1.29              | n.a.   |
| 2             |           | 10.372             | 62.302        | 213.087        | 98.96           | 98.71             | n.a.   |
| <b>Total:</b> |           |                    | <b>62.955</b> | <b>215.866</b> | <b>100.00</b>   | <b>100.00</b>     |        |

**Supplementary Figure 87.** HPLC spectrum for compound (-)-2am

(+)-**1an**: ODH, *i*-PrOH/hexane = 1/99,  $v = 1.0$  mL/min,  $\lambda = 254$  nm

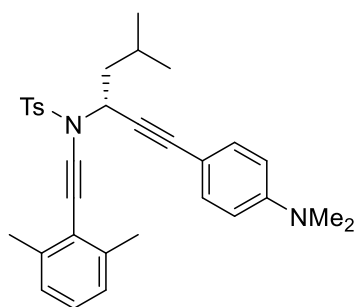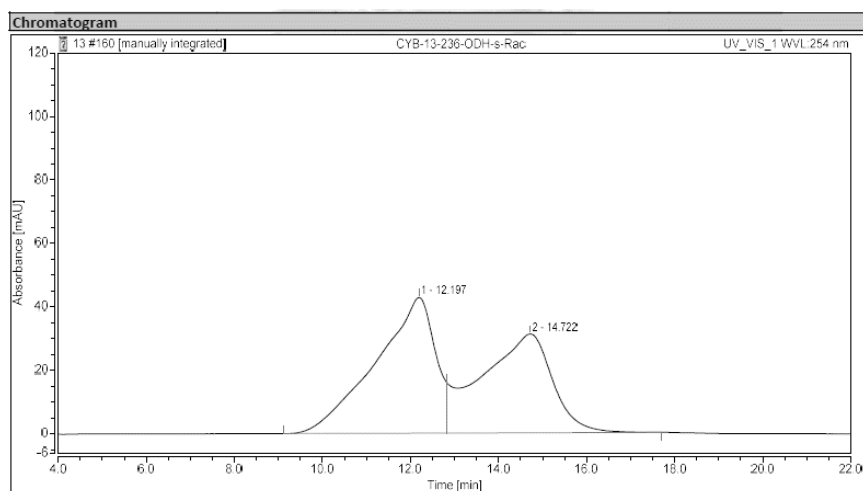

**Integration Results**

| No.           | Peak Name | Retention Time<br>min | Area<br>mAU*min | Height<br>mAU | Relative Area<br>% | Relative Height<br>% | Amount |
|---------------|-----------|-----------------------|-----------------|---------------|--------------------|----------------------|--------|
| 1             |           | 12.197                | 66.631          | 42.766        | 53.38              | 57.85                | n.a.   |
| 2             |           | 14.722                | 58.194          | 31.156        | 46.62              | 42.15                | n.a.   |
| <b>Total:</b> |           |                       | <b>124.825</b>  | <b>73.922</b> | <b>100.00</b>      | <b>100.00</b>        |        |

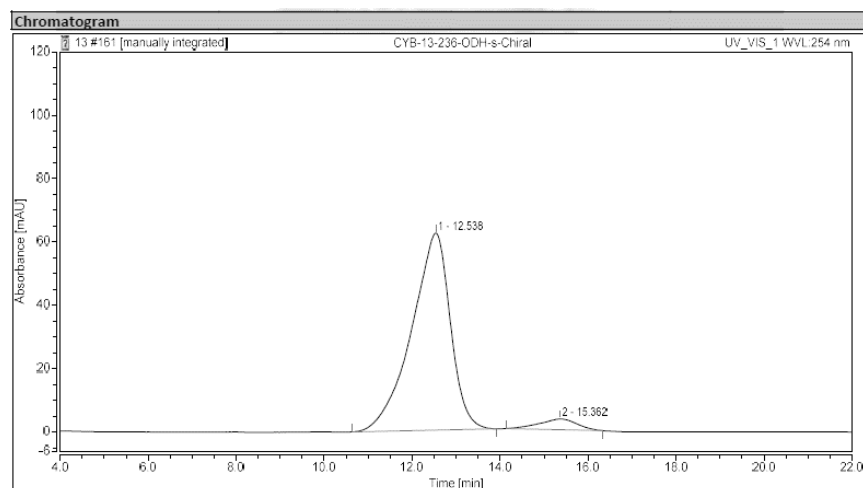

**Integration Results**

| No.           | Peak Name | Retention Time<br>min | Area<br>mAU*min | Height<br>mAU | Relative Area<br>% | Relative Height<br>% | Amount |
|---------------|-----------|-----------------------|-----------------|---------------|--------------------|----------------------|--------|
| 1             |           | 12.538                | 63.691          | 62.223        | 95.01              | 94.83                | n.a.   |
| 2             |           | 15.362                | 3.342           | 3.389         | 4.99               | 5.17                 | n.a.   |
| <b>Total:</b> |           |                       | <b>67.033</b>   | <b>65.612</b> | <b>100.00</b>      | <b>100.00</b>        |        |

**Supplementary Figure 88.** HPLC spectrum for compound (+)-**1an**

(-)-2an: IC, *i*-PrOH/hexane = 10/90,  $v = 1.0$  mL/min,  $\lambda = 254$  nm

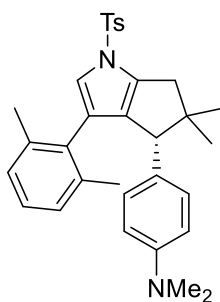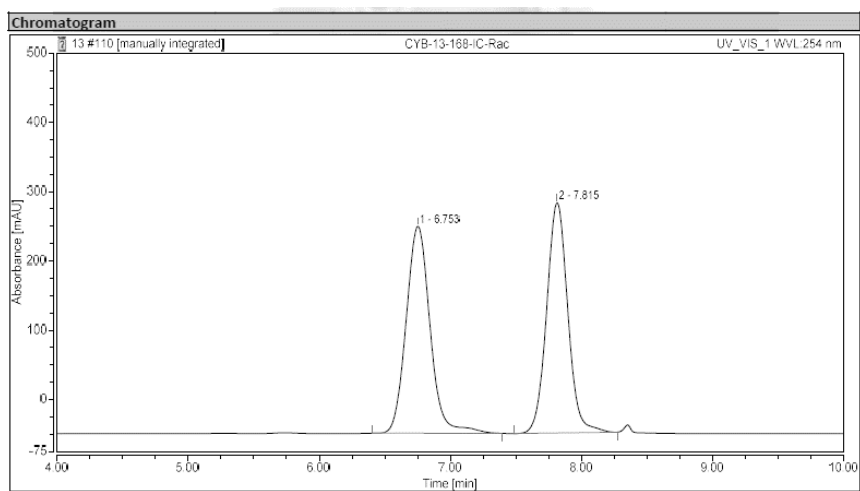

**Integration Results**

| No.           | Peak Name | Retention Time min | Area mAU*min   | Height mAU     | Relative Area % | Relative Height % | Amount |
|---------------|-----------|--------------------|----------------|----------------|-----------------|-------------------|--------|
| 1             |           | 6.753              | 63.266         | 298.969        | 50.45           | 47.34             | n.a.   |
| 2             |           | 7.815              | 62.149         | 332.606        | 49.55           | 52.66             | n.a.   |
| <b>Total:</b> |           |                    | <b>125.415</b> | <b>631.574</b> | <b>100.00</b>   | <b>100.00</b>     |        |

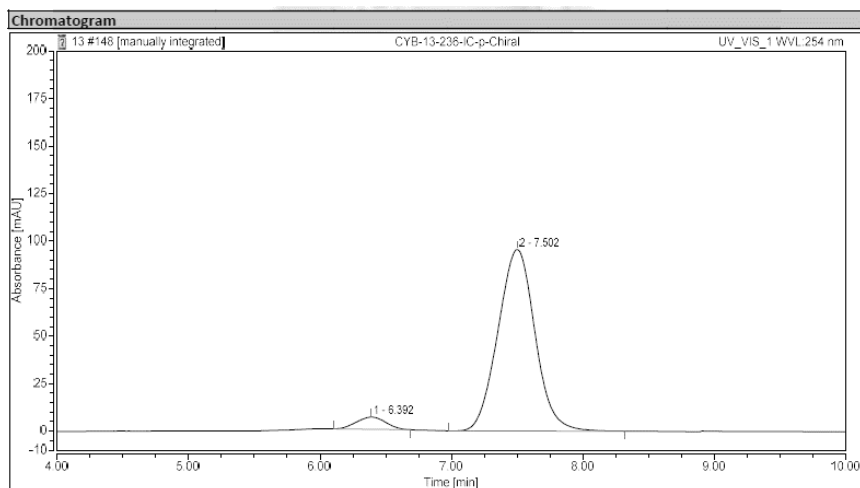

**Integration Results**

| No.           | Peak Name | Retention Time min | Area mAU*min  | Height mAU     | Relative Area % | Relative Height % | Amount |
|---------------|-----------|--------------------|---------------|----------------|-----------------|-------------------|--------|
| 1             |           | 6.392              | 1.655         | 6.409          | 5.04            | 6.29              | n.a.   |
| 2             |           | 7.502              | 31.205        | 95.483         | 94.96           | 93.71             | n.a.   |
| <b>Total:</b> |           |                    | <b>32.860</b> | <b>101.892</b> | <b>100.00</b>   | <b>100.00</b>     |        |

**Supplementary Figure 89.** HPLC spectrum for compound (-)-2an

(+)-1ao: ODH, *i*-PrOH/hexane = 1/99,  $v = 1.0$  mL/min,  $\lambda = 254$  nm

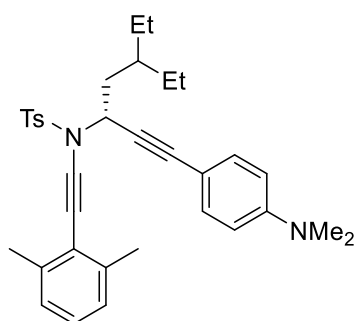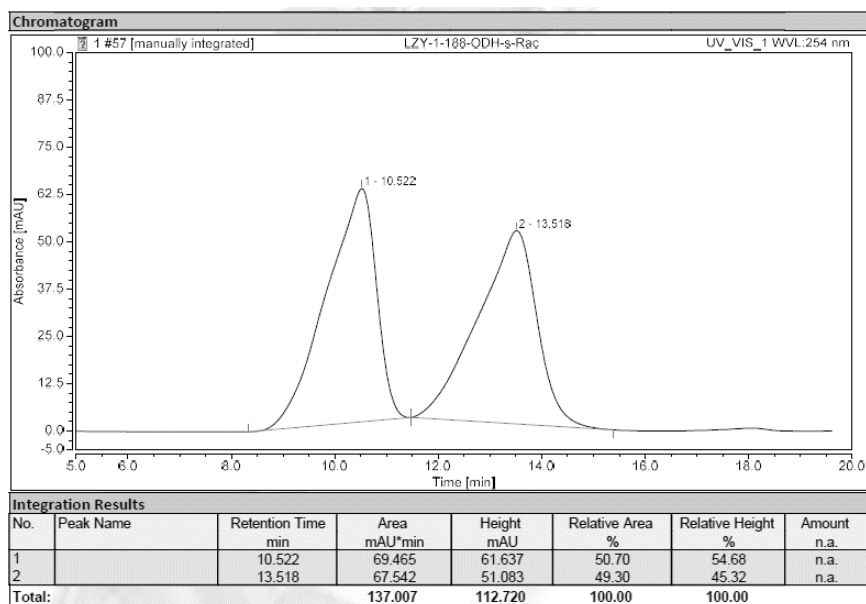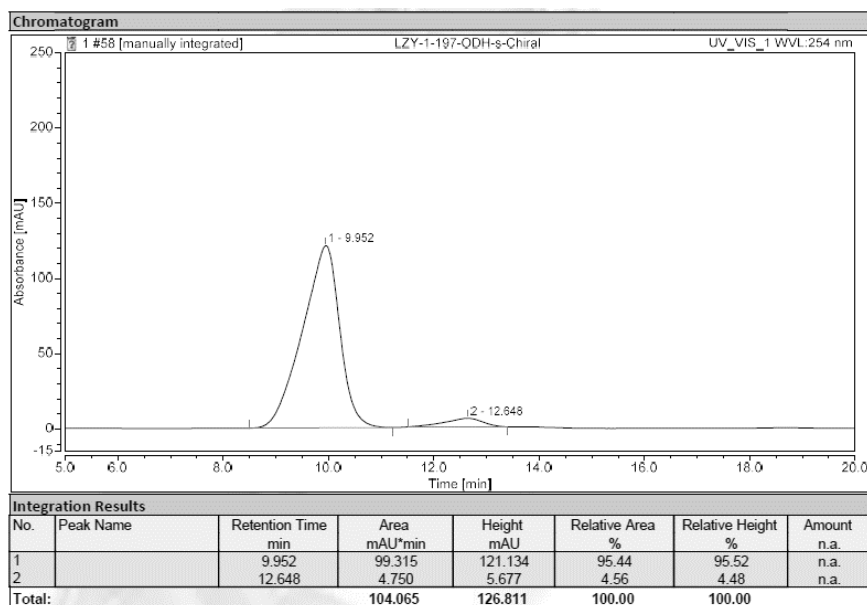

**Supplementary Figure 90.** HPLC spectrum for compound (+)-1ao

(-)-2ao: IC, *i*-PrOH/hexane = 2/98,  $v = 1.0$  mL/min,  $\lambda = 254$  nm

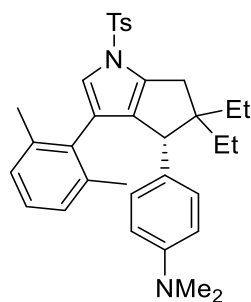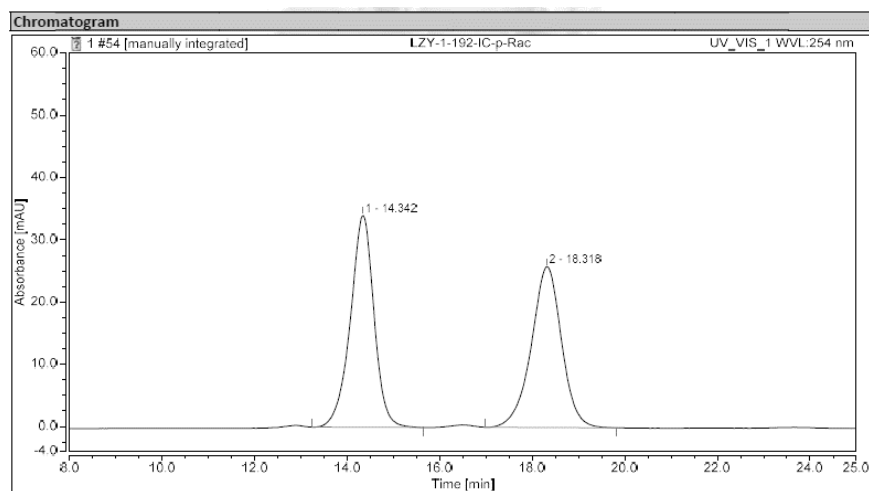

**Integration Results**

| No.           | Peak Name | Retention Time<br>min | Area<br>mAU*min | Height<br>mAU | Relative Area<br>% | Relative Height<br>% | Amount |
|---------------|-----------|-----------------------|-----------------|---------------|--------------------|----------------------|--------|
| 1             |           | 14.342                | 20.135          | 34.031        | 50.74              | 56.85                | n.a.   |
| 2             |           | 18.318                | 19.551          | 25.830        | 49.26              | 43.15                | n.a.   |
| <b>Total:</b> |           |                       | <b>39.686</b>   | <b>59.861</b> | <b>100.00</b>      | <b>100.00</b>        |        |

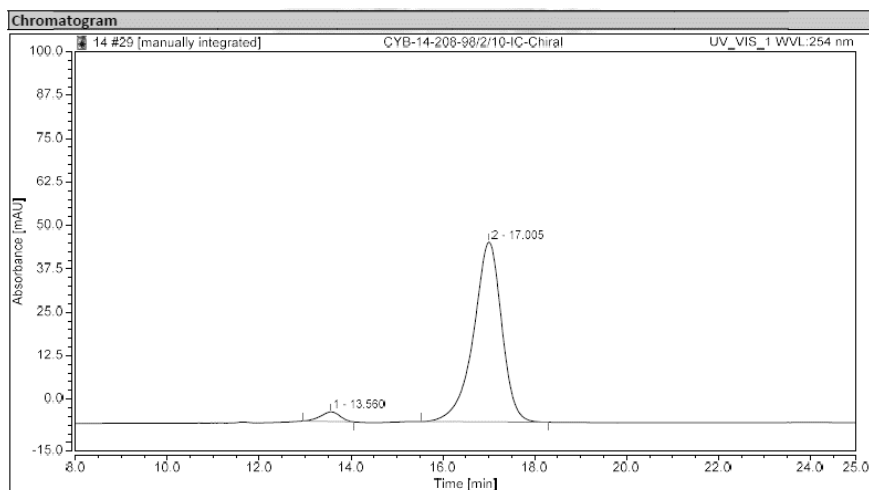

**Integration Results**

| No.           | Peak Name | Retention Time<br>min | Area<br>mAU*min | Height<br>mAU | Relative Area<br>% | Relative Height<br>% | Amount |
|---------------|-----------|-----------------------|-----------------|---------------|--------------------|----------------------|--------|
| 1             |           | 13.560                | 1.355           | 2.764         | 3.55               | 5.07                 | n.a.   |
| 2             |           | 17.005                | 36.810          | 51.779        | 96.45              | 94.93                | n.a.   |
| <b>Total:</b> |           |                       | <b>38.165</b>   | <b>54.543</b> | <b>100.00</b>      | <b>100.00</b>        |        |

**Supplementary Figure 91.** HPLC spectrum for compound (-)-2ao

(+)-**1ap**: ADH, *i*-PrOH/hexane = 10/90,  $v = 1.0$  mL/min,  $\lambda = 254$  nm

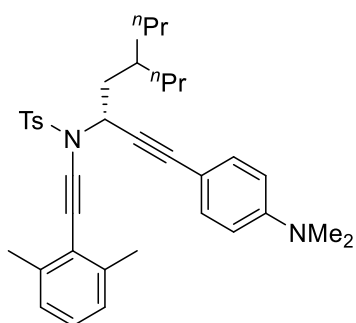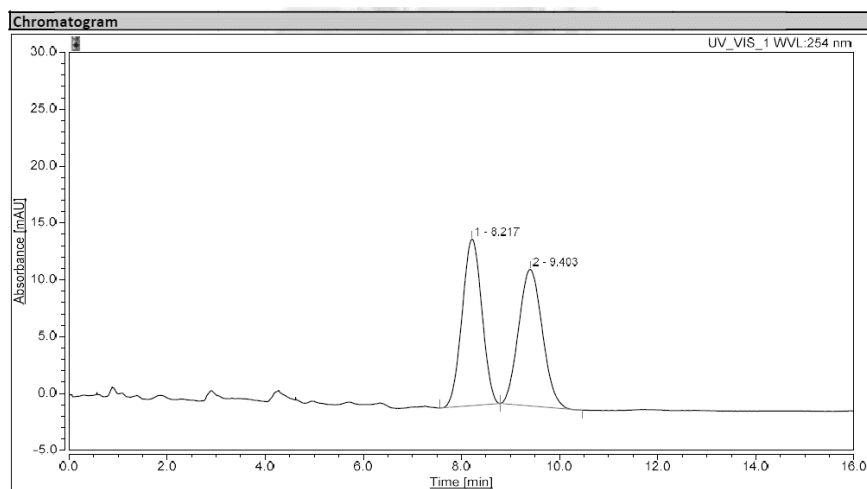

**Integration Results**

| No.           | Peak Name | Retention Time min | Area mAU*min  | Height mAU    | Relative Area % | Relative Height % | Amount n.a. |
|---------------|-----------|--------------------|---------------|---------------|-----------------|-------------------|-------------|
| 1             |           | 8.217              | 6.820         | 14.657        | 50.33           | 54.95             | n.a.        |
| 2             |           | 9.403              | 6.731         | 12.016        | 49.67           | 45.05             | n.a.        |
| <b>Total:</b> |           |                    | <b>13.552</b> | <b>26.673</b> | <b>100.00</b>   | <b>100.00</b>     |             |

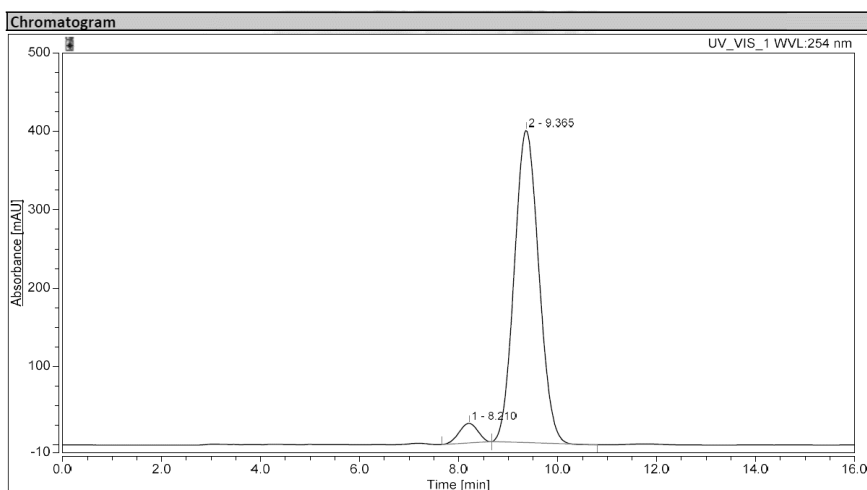

**Integration Results**

| No.           | Peak Name | Retention Time min | Area mAU*min   | Height mAU     | Relative Area % | Relative Height % | Amount n.a. |
|---------------|-----------|--------------------|----------------|----------------|-----------------|-------------------|-------------|
| 1             |           | 8.210              | 10.860         | 24.933         | 4.54            | 5.89              | n.a.        |
| 2             |           | 9.365              | 228.105        | 398.100        | 95.46           | 94.11             | n.a.        |
| <b>Total:</b> |           |                    | <b>238.965</b> | <b>423.033</b> | <b>100.00</b>   | <b>100.00</b>     |             |

**Supplementary Figure 92.** HPLC spectrum for compound (+)-**1ap**



(-)-2ap: IE, *i*-PrOH/hexane = 2/98,  $v = 1.0$  mL/min,  $\lambda = 254$  nm

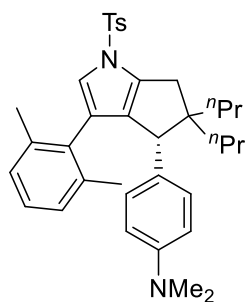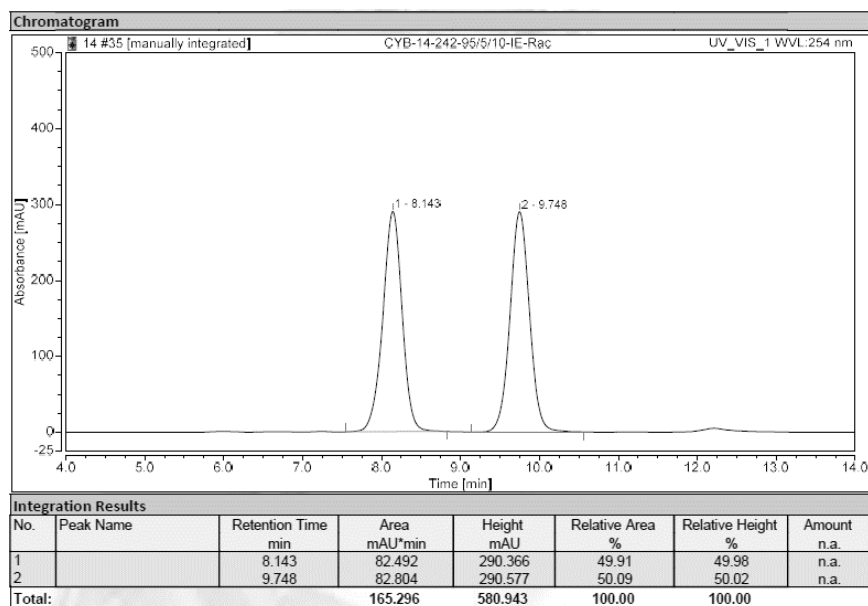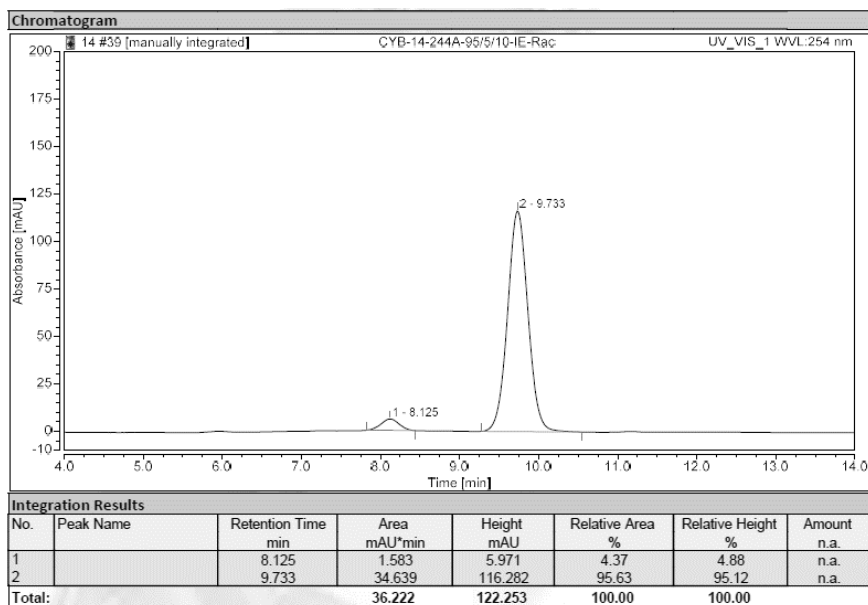

Supplementary Figure 93. HPLC spectrum for compound (-)-2ap

(+)-**1aq**: ADH, *i*-PrOH/hexane = 20/80,  $v = 1.0$  mL/min,  $\lambda = 254$  nm

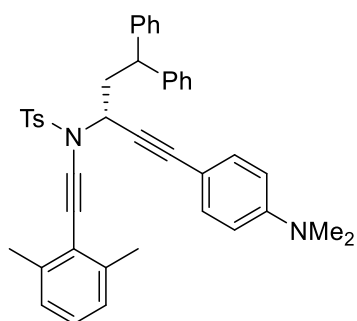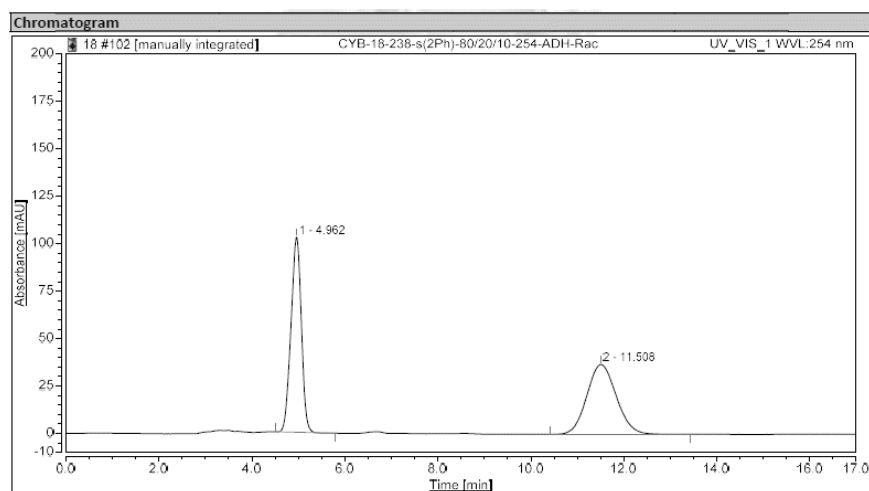

**Integration Results**

| No.           | Peak Name | Retention Time min | Area mAU*min  | Height mAU     | Relative Area % | Relative Height % | Amount |
|---------------|-----------|--------------------|---------------|----------------|-----------------|-------------------|--------|
| 1             |           | 4.962              | 26.485        | 102.801        | 49.62           | 73.66             | n.a.   |
| 2             |           | 11.508             | 26.891        | 36.755         | 50.38           | 26.34             | n.a.   |
| <b>Total:</b> |           |                    | <b>53.376</b> | <b>139.556</b> | <b>100.00</b>   | <b>100.00</b>     |        |

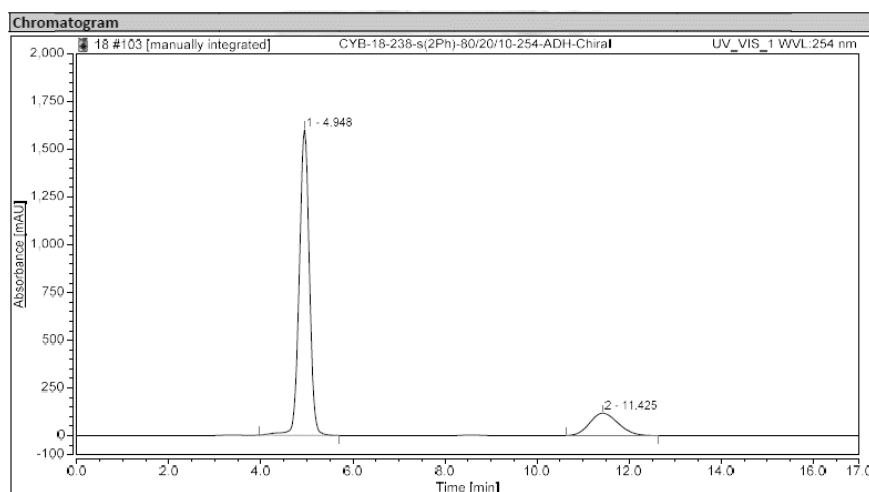

**Integration Results**

| No.           | Peak Name | Retention Time min | Area mAU*min   | Height mAU      | Relative Area % | Relative Height % | Amount |
|---------------|-----------|--------------------|----------------|-----------------|-----------------|-------------------|--------|
| 1             |           | 4.948              | 407.349        | 1600.188        | 82.92           | 93.17             | n.a.   |
| 2             |           | 11.425             | 83.882         | 117.250         | 17.08           | 6.83              | n.a.   |
| <b>Total:</b> |           |                    | <b>491.231</b> | <b>1717.438</b> | <b>100.00</b>   | <b>100.00</b>     |        |

**Supplementary Figure 94.** HPLC spectrum for compound (+)-**1aq**

(-)-2aq: IE, *i*-PrOH/hexane = 20/80,  $v = 1.0$  mL/min,  $\lambda = 254$  nm

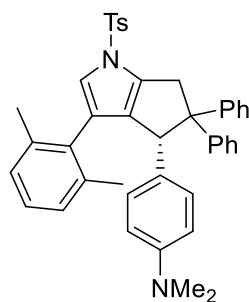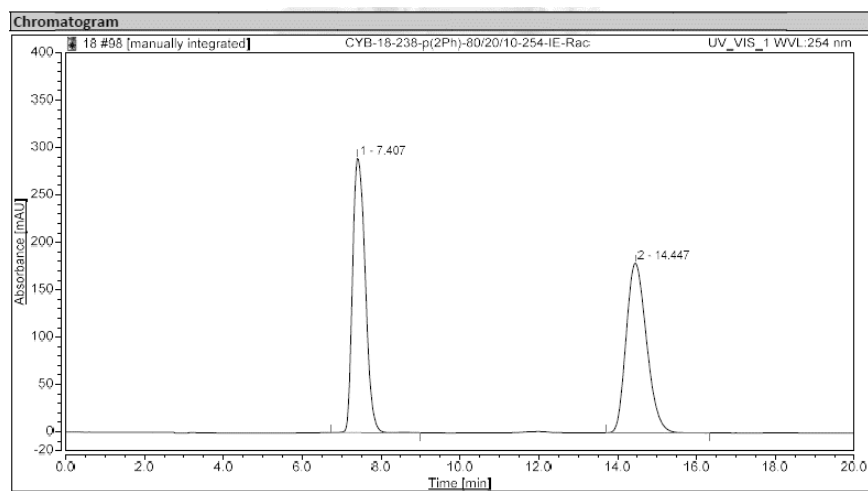

**Integration Results**

| No.           | Peak Name | Retention Time<br>min | Area<br>mAU*min | Height<br>mAU  | Relative Area<br>% | Relative Height<br>% | Amount |
|---------------|-----------|-----------------------|-----------------|----------------|--------------------|----------------------|--------|
| 1             |           | 7.407                 | 107.830         | 290.198        | 50.13              | 61.82                | n.a.   |
| 2             |           | 14.447                | 107.291         | 179.228        | 49.87              | 38.18                | n.a.   |
| <b>Total:</b> |           |                       | <b>215.121</b>  | <b>469.426</b> | <b>100.00</b>      | <b>100.00</b>        |        |

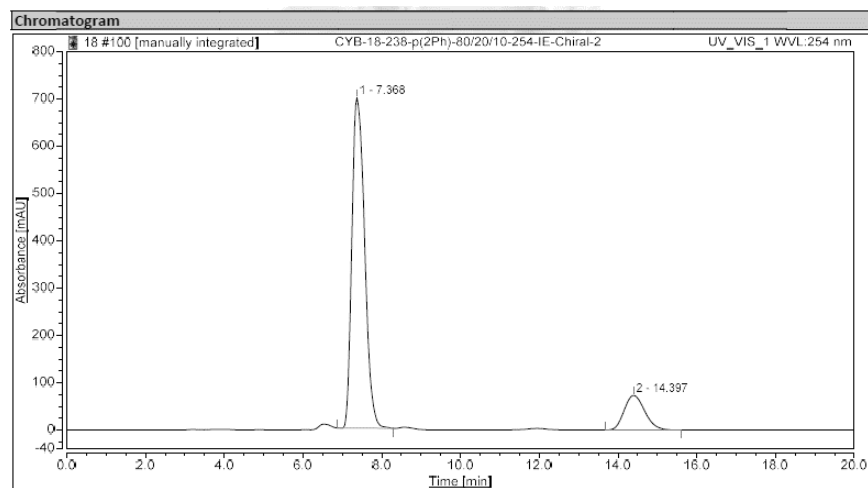

**Integration Results**

| No.           | Peak Name | Retention Time<br>min | Area<br>mAU*min | Height<br>mAU  | Relative Area<br>% | Relative Height<br>% | Amount |
|---------------|-----------|-----------------------|-----------------|----------------|--------------------|----------------------|--------|
| 1             |           | 7.368                 | 261.530         | 698.795        | 85.59              | 90.53                | n.a.   |
| 2             |           | 14.397                | 44.034          | 73.082         | 14.41              | 9.47                 | n.a.   |
| <b>Total:</b> |           |                       | <b>305.563</b>  | <b>771.877</b> | <b>100.00</b>      | <b>100.00</b>        |        |

**Supplementary Figure 95.** HPLC spectrum for compound (-)-2aq

(+)-**1ar** (1:1 dr): **IE**, *i*-PrOH/hexane = 10/90,  $v = 1.0$  mL/min,  $\lambda = 254$  nm

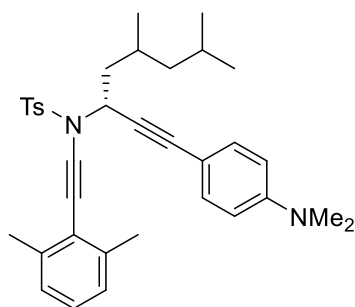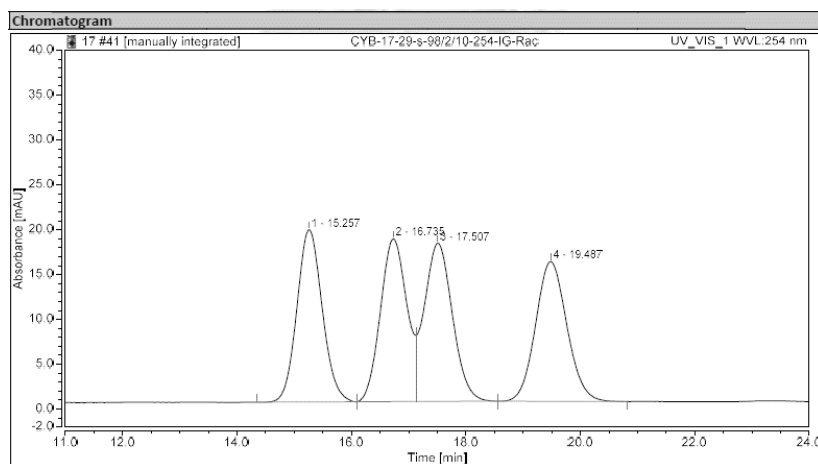

**Integration Results**

| No.           | Peak Name | Retention Time min | Area mAU*min  | Height mAU    | Relative Area % | Relative Height % | Amount |
|---------------|-----------|--------------------|---------------|---------------|-----------------|-------------------|--------|
| 1             |           | 15.257             | 9.841         | 19.215        | 24.93           | 27.21             | n.a.   |
| 2             |           | 16.735             | 9.717         | 18.151        | 24.61           | 25.70             | n.a.   |
| 3             |           | 17.507             | 10.032        | 17.652        | 25.41           | 25.00             | n.a.   |
| 4             |           | 19.487             | 9.888         | 15.599        | 25.05           | 22.09             | n.a.   |
| <b>Total:</b> |           |                    | <b>39.478</b> | <b>70.616</b> | <b>100.00</b>   | <b>100.00</b>     |        |

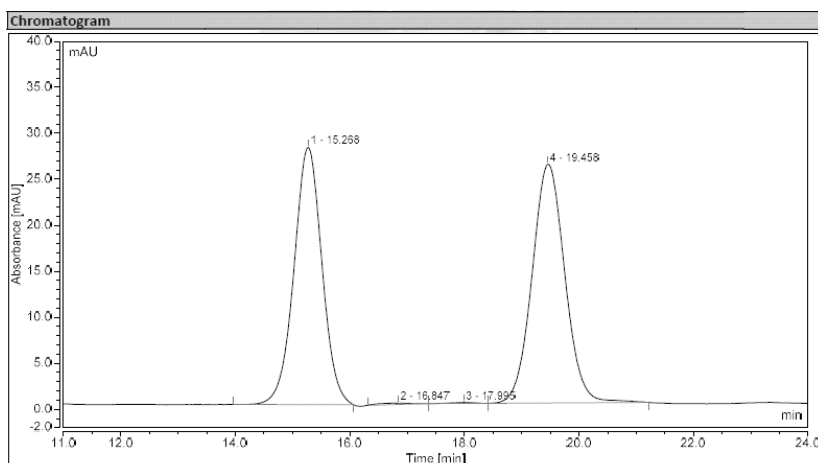

**Integration Results**

| No.           | Peak Name | Retention Time min | Area mAU*min  | Height mAU    | Relative Area % | Relative Height % | Amount |
|---------------|-----------|--------------------|---------------|---------------|-----------------|-------------------|--------|
| 1             |           | 15.268             | 15.836        | 27.981        | 47.73           | 51.61             | n.a.   |
| 2             |           | 16.847             | 0.097         | 0.147         | 0.29            | 0.27              | n.a.   |
| 3             |           | 17.995             | 0.053         | 0.118         | 0.16            | 0.22              | n.a.   |
| 4             |           | 19.458             | 17.192        | 25.968        | 51.82           | 47.90             | n.a.   |
| <b>Total:</b> |           |                    | <b>33.178</b> | <b>54.213</b> | <b>100.00</b>   | <b>100.00</b>     |        |

**Supplementary Figure 96.** HPLC spectrum for compound (+)-**1ar**

(-)-2ar: IE, *i*-PrOH/hexane = 5/95,  $v = 1.0$  mL/min,  $\lambda = 254$  nm

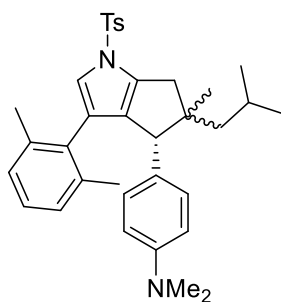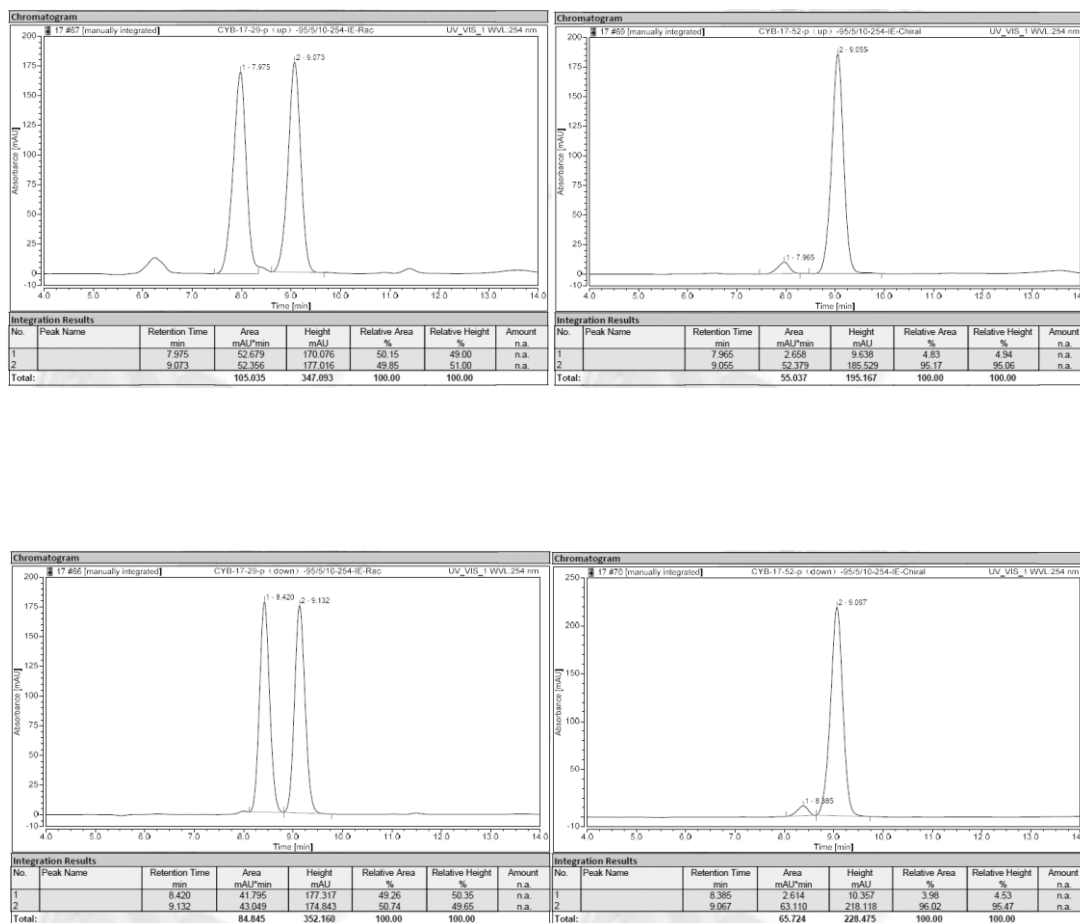

Supplementary Figure 97. HPLC spectrum for compound (-)-2ar

(+)-**1as**: **IE**, *i*-PrOH/hexane = 10/90,  $v = 1.0$  mL/min,  $\lambda = 254$  nm

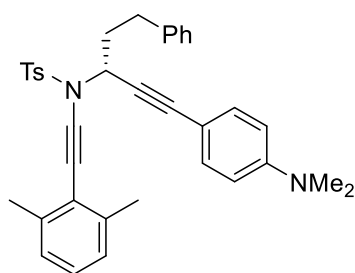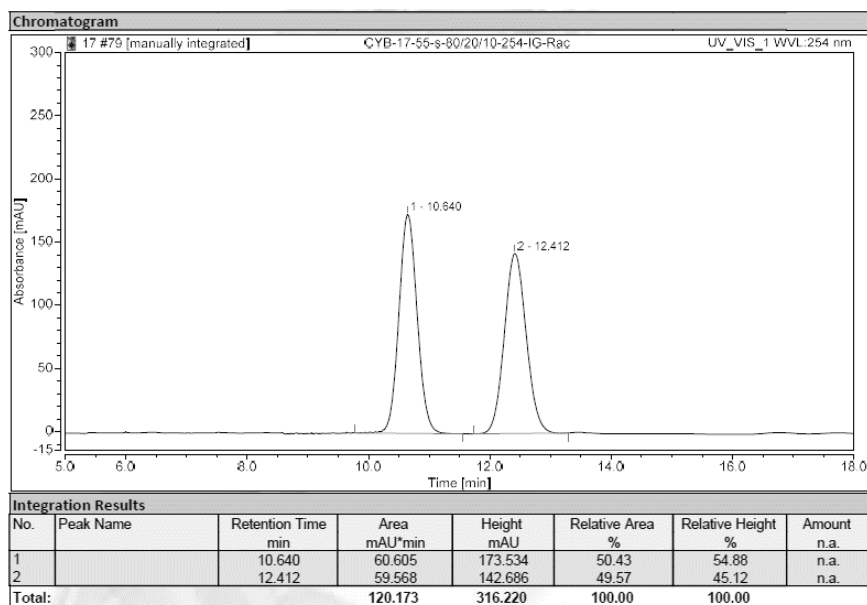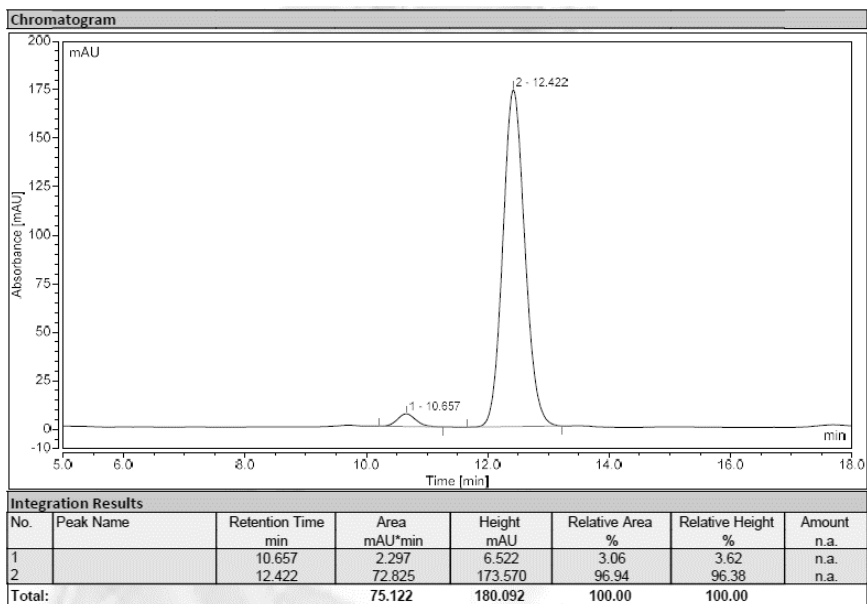

**Supplementary Figure 98.** HPLC spectrum for compound (+)-**1as**

(-)-2as: **IE**, *i*-PrOH/hexane = 2/98,  $\nu = 1.0$  mL/min,  $\lambda = 254$  nm

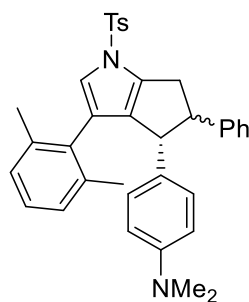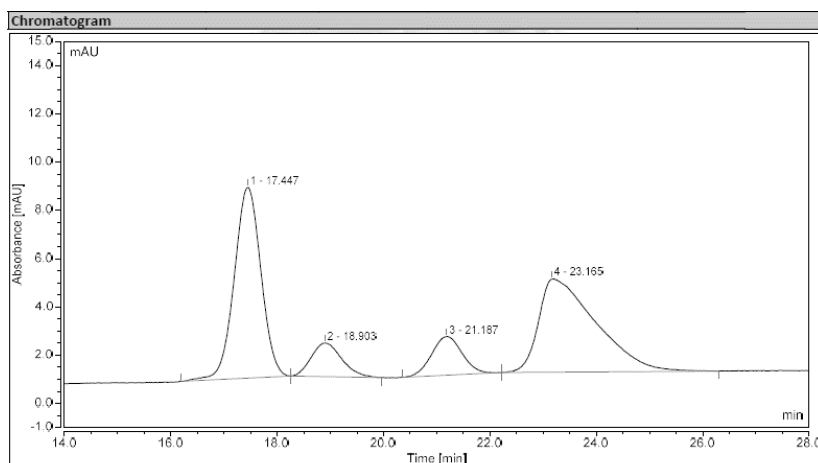

**Integration Results**

| No.           | Peak Name | Retention Time<br>min | Area<br>mAU*min | Height<br>mAU | Relative Area<br>% | Relative Height<br>% | Amount<br>n.a. |
|---------------|-----------|-----------------------|-----------------|---------------|--------------------|----------------------|----------------|
| 1             |           | 17.447                | 4.593           | 7.909         | 40.28              | 53.45                | n.a.           |
| 2             |           | 18.903                | 0.923           | 1.400         | 8.10               | 9.46                 | n.a.           |
| 3             |           | 21.187                | 1.066           | 1.613         | 9.35               | 10.90                | n.a.           |
| 4             |           | 23.165                | 4.819           | 3.874         | 42.27              | 26.18                | n.a.           |
| <b>Total:</b> |           |                       | <b>11.401</b>   | <b>14.796</b> | <b>100.00</b>      | <b>100.00</b>        |                |

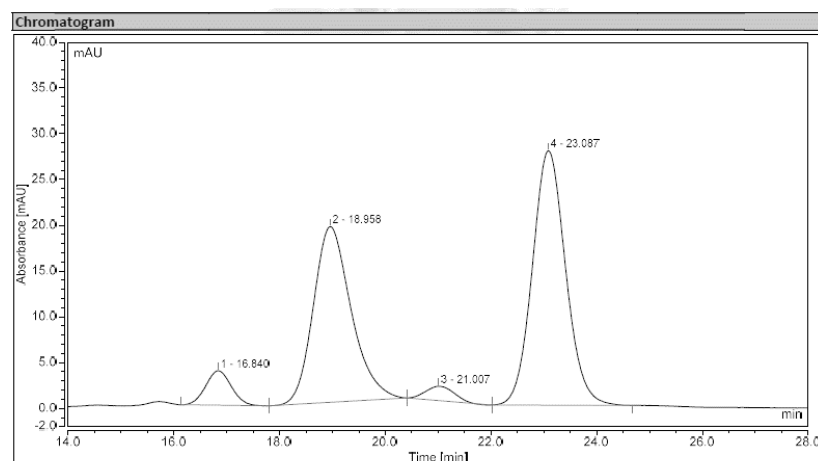

**Integration Results**

| No.           | Peak Name | Retention Time<br>min | Area<br>mAU*min | Height<br>mAU | Relative Area<br>% | Relative Height<br>% | Amount<br>n.a. |
|---------------|-----------|-----------------------|-----------------|---------------|--------------------|----------------------|----------------|
| 1             |           | 16.840                | 2.115           | 3.768         | 5.39               | 7.20                 | n.a.           |
| 2             |           | 18.958                | 15.907          | 19.210        | 40.54              | 36.70                | n.a.           |
| 3             |           | 21.007                | 0.956           | 1.569         | 2.44               | 3.00                 | n.a.           |
| 4             |           | 23.087                | 20.259          | 27.803        | 51.63              | 53.11                | n.a.           |
| <b>Total:</b> |           |                       | <b>39.236</b>   | <b>52.349</b> | <b>100.00</b>      | <b>100.00</b>        |                |

**Supplementary Figure 99.** HPLC spectrum for compound (-)-2as

(+)-**2a**: **IE**, *i*-PrOH/hexane = 2/98,  $v = 1.0$  mL/min,  $\lambda = 254$  nm

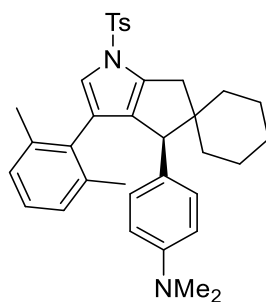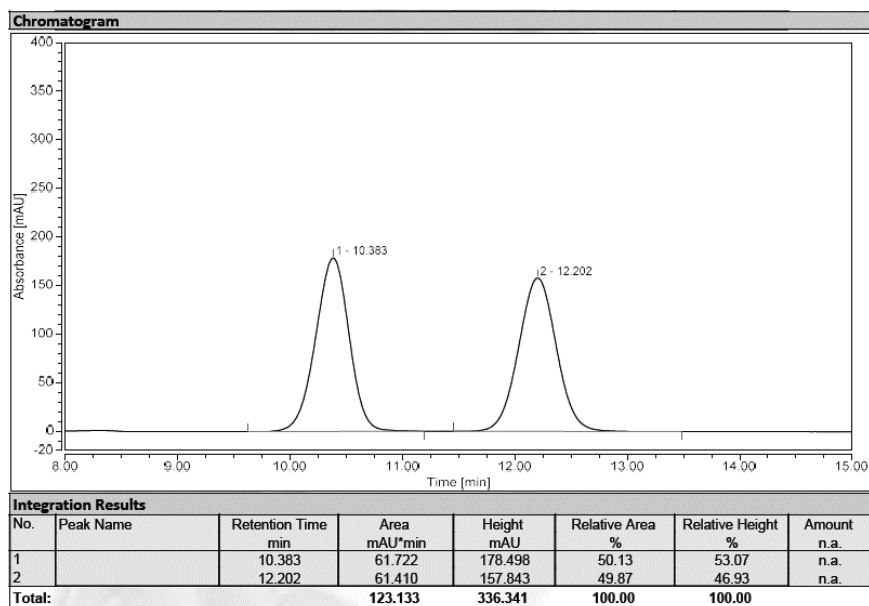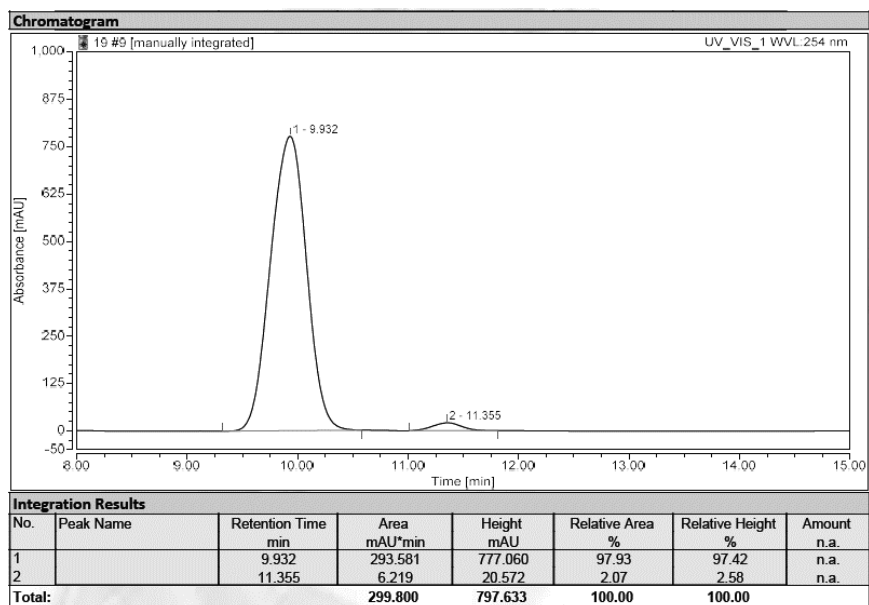

**Supplementary Figure 100.** HPLC spectrum for compound (+)-**2a**



**3aa: IE**, *i*-PrOH/hexane = 5/95,  $\nu = 1.0$  mL/min,  $\lambda = 254$  nm

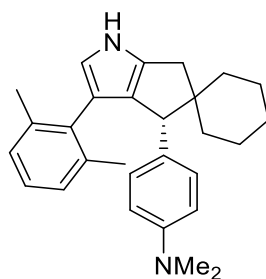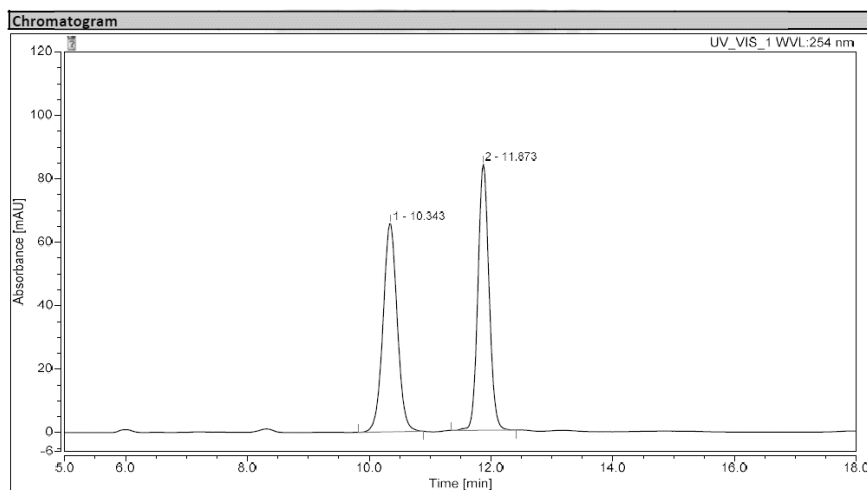

**Integration Results**

| No.           | Peak Name | Retention Time<br>min | Area<br>mAU*min | Height<br>mAU  | Relative Area<br>% | Relative Height<br>% | Amount<br>n.a. |
|---------------|-----------|-----------------------|-----------------|----------------|--------------------|----------------------|----------------|
| 1             |           | 10.343                | 17.713          | 65.784         | 49.99              | 43.95                | n.a.           |
| 2             |           | 11.873                | 17.718          | 83.885         | 50.01              | 56.05                | n.a.           |
| <b>Total:</b> |           |                       | <b>35.431</b>   | <b>149.669</b> | <b>100.00</b>      | <b>100.00</b>        |                |

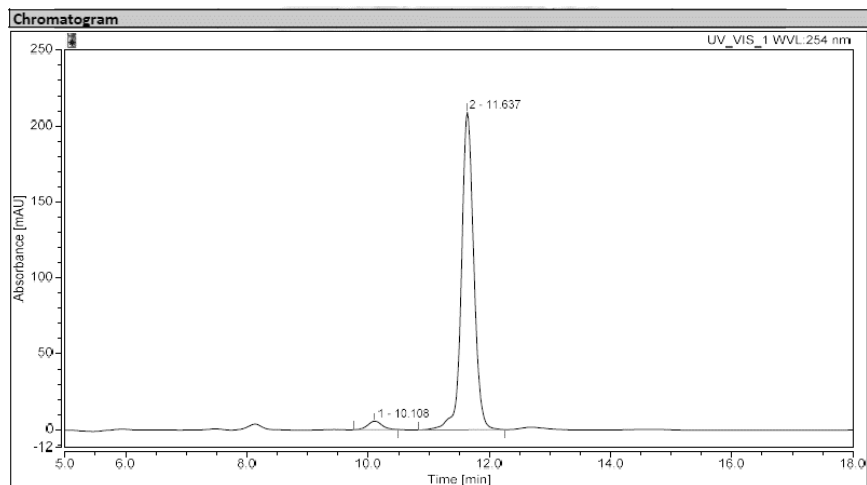

**Integration Results**

| No.           | Peak Name | Retention Time<br>min | Area<br>mAU*min | Height<br>mAU  | Relative Area<br>% | Relative Height<br>% | Amount<br>n.a. |
|---------------|-----------|-----------------------|-----------------|----------------|--------------------|----------------------|----------------|
| 1             |           | 10.108                | 1.532           | 5.615          | 3.01               | 2.61                 | n.a.           |
| 2             |           | 11.637                | 49.417          | 209.319        | 96.99              | 97.39                | n.a.           |
| <b>Total:</b> |           |                       | <b>50.948</b>   | <b>214.934</b> | <b>100.00</b>      | <b>100.00</b>        |                |

**Supplementary Figure 101.** HPLC spectrum for compound **3aa**

**3ab: ADH, *i*-PrOH/hexane = 5/95,  $\nu$  = 1.0 mL/min,  $\lambda$  = 254 nm**

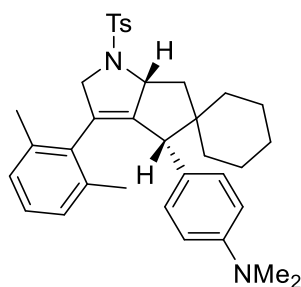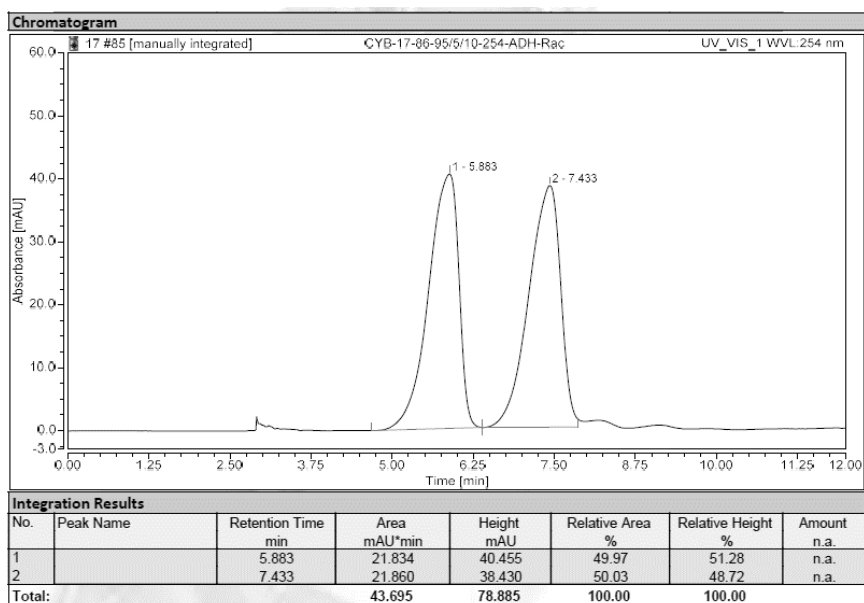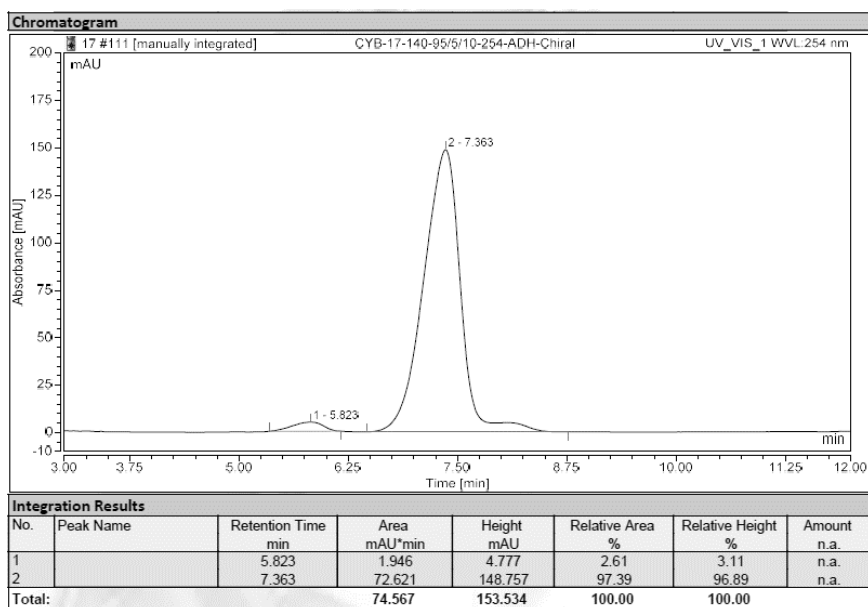

**Supplementary Figure 102. HPLC spectrum for compound 3ab**

**3ac: IE**, *i*-PrOH/hexane = 30/70,  $v = 1.0$  mL/min,  $\lambda = 254$  nm

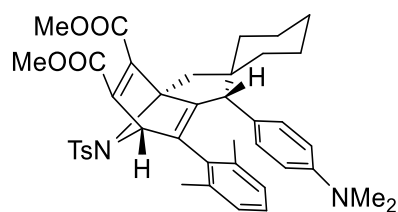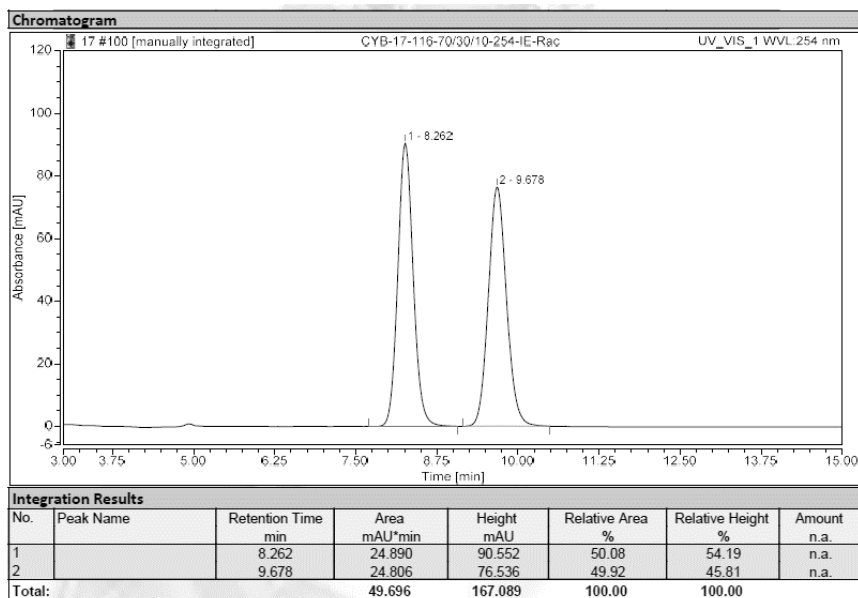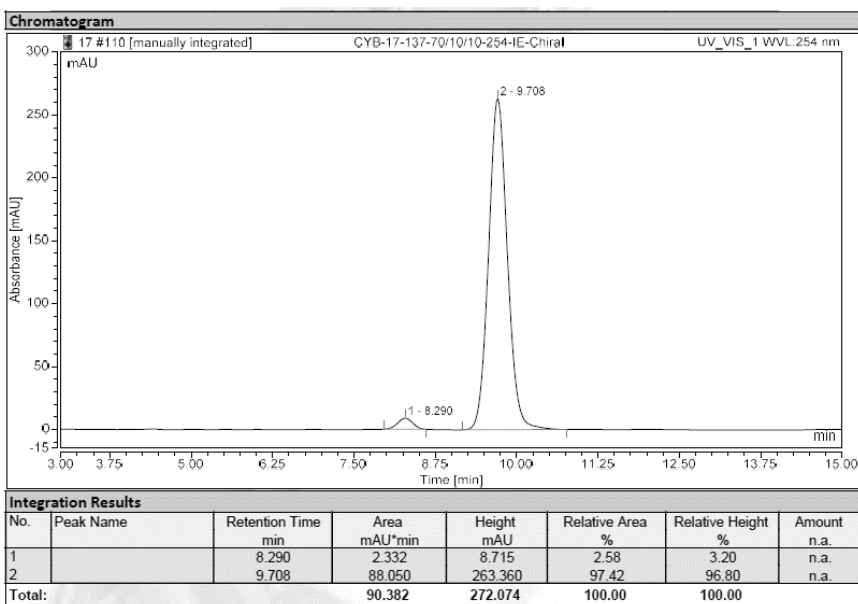

**Supplementary Figure 103.** HPLC spectrum for compound **3ac**

**3ad: IE, *i*-PrOH/hexane = 5/95,  $v = 1.0$  mL/min,  $\lambda = 254$  nm**

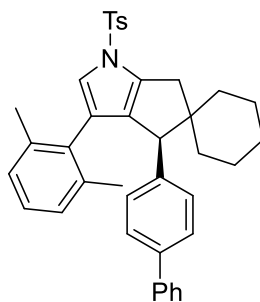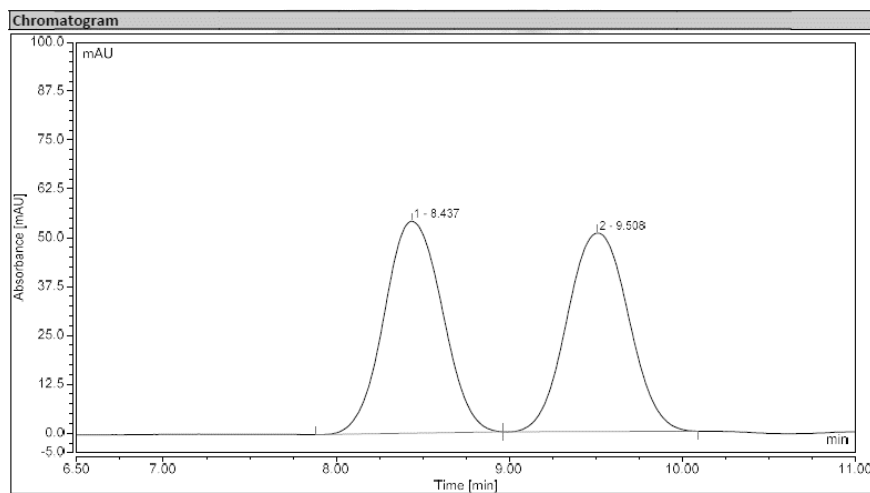

**Integration Results**

| No.           | Peak Name | Retention Time<br>min | Area<br>mAU*min | Height<br>mAU  | Relative Area<br>% | Relative Height<br>% | Amount<br>n.a. |
|---------------|-----------|-----------------------|-----------------|----------------|--------------------|----------------------|----------------|
| 1             |           | 8.437                 | 21.091          | 54.219         | 50.23              | 51.64                | n.a.           |
| 2             |           | 9.508                 | 20.900          | 50.773         | 49.77              | 48.36                | n.a.           |
| <b>Total:</b> |           |                       | <b>41.991</b>   | <b>104.992</b> | <b>100.00</b>      | <b>100.00</b>        |                |

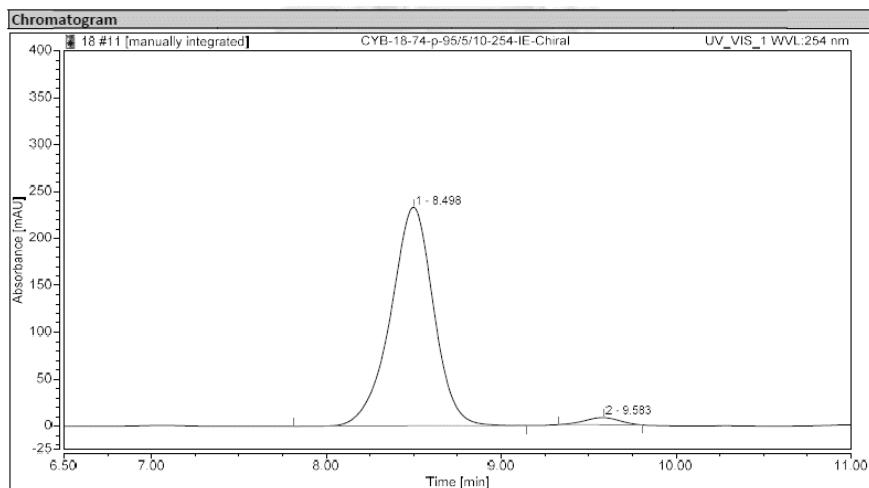

**Integration Results**

| No.           | Peak Name | Retention Time<br>min | Area<br>mAU*min | Height<br>mAU  | Relative Area<br>% | Relative Height<br>% | Amount<br>n.a. |
|---------------|-----------|-----------------------|-----------------|----------------|--------------------|----------------------|----------------|
| 1             |           | 8.498                 | 66.352          | 233.054        | 97.44              | 96.85                | n.a.           |
| 2             |           | 9.583                 | 1.746           | 7.573          | 2.56               | 3.15                 | n.a.           |
| <b>Total:</b> |           |                       | <b>68.098</b>   | <b>240.627</b> | <b>100.00</b>      | <b>100.00</b>        |                |

**Supplementary Figure 104. HPLC spectrum for compound 3ad**

3fa: ADH, *i*-PrOH/hexane = 10/90,  $v = 1.0$  mL/min,  $\lambda = 254$  nm

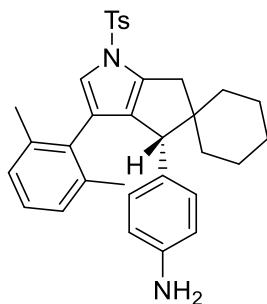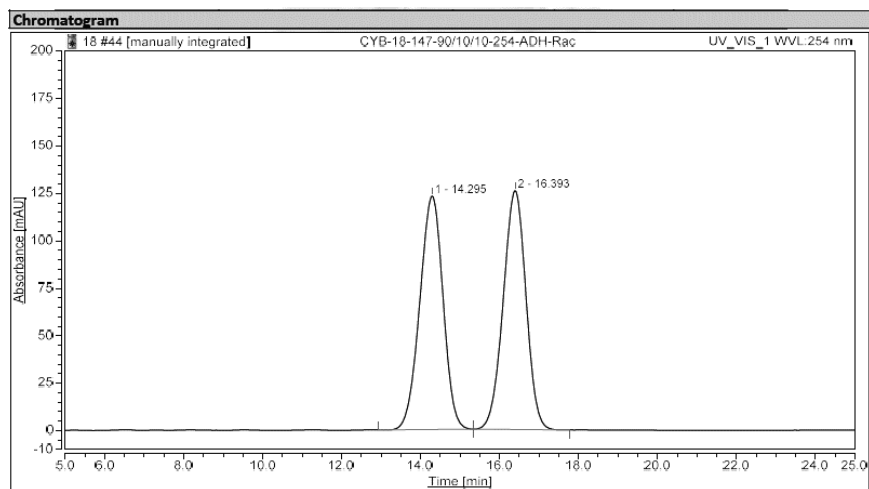

**Integration Results**

| No.           | Peak Name | Retention Time<br>min | Area<br>mAU*min | Height<br>mAU  | Relative Area<br>% | Relative Height<br>% | Amount |
|---------------|-----------|-----------------------|-----------------|----------------|--------------------|----------------------|--------|
| 1             |           | 14.295                | 83.927          | 123.070        | 49.98              | 49.44                | n.a.   |
| 2             |           | 16.393                | 83.978          | 125.861        | 50.02              | 50.56                | n.a.   |
| <b>Total:</b> |           |                       | <b>167.905</b>  | <b>248.931</b> | <b>100.00</b>      | <b>100.00</b>        |        |

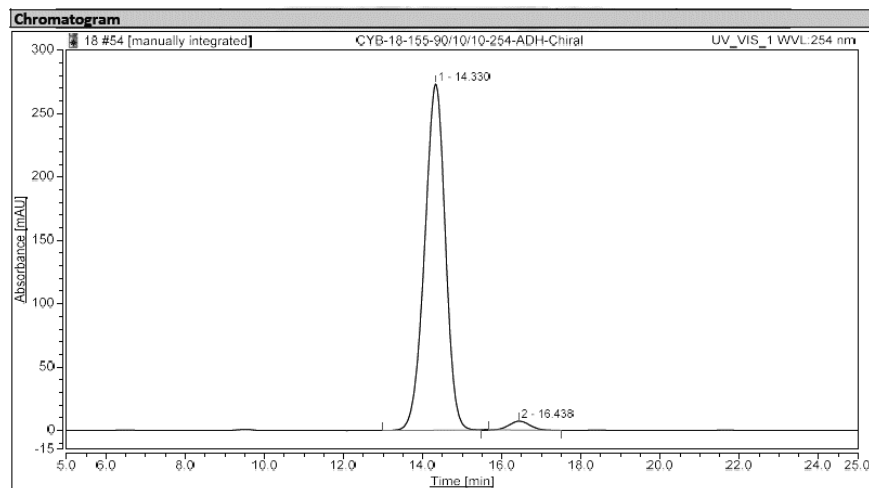

**Integration Results**

| No.           | Peak Name | Retention Time<br>min | Area<br>mAU*min | Height<br>mAU  | Relative Area<br>% | Relative Height<br>% | Amount |
|---------------|-----------|-----------------------|-----------------|----------------|--------------------|----------------------|--------|
| 1             |           | 14.330                | 165.591         | 273.320        | 97.47              | 97.48                | n.a.   |
| 2             |           | 16.438                | 4.297           | 7.064          | 2.53               | 2.52                 | n.a.   |
| <b>Total:</b> |           |                       | <b>169.888</b>  | <b>280.384</b> | <b>100.00</b>      | <b>100.00</b>        |        |

Supplementary Figure 105. HPLC spectrum for compound 3fa

**3fb**: ODH, *i*-PrOH/hexane = 5/95,  $v = 1.0$  mL/min,  $\lambda = 254$  nm

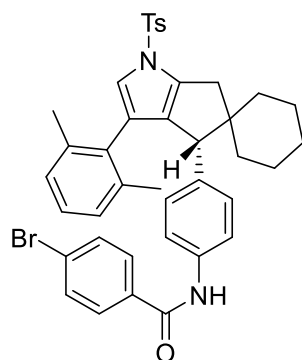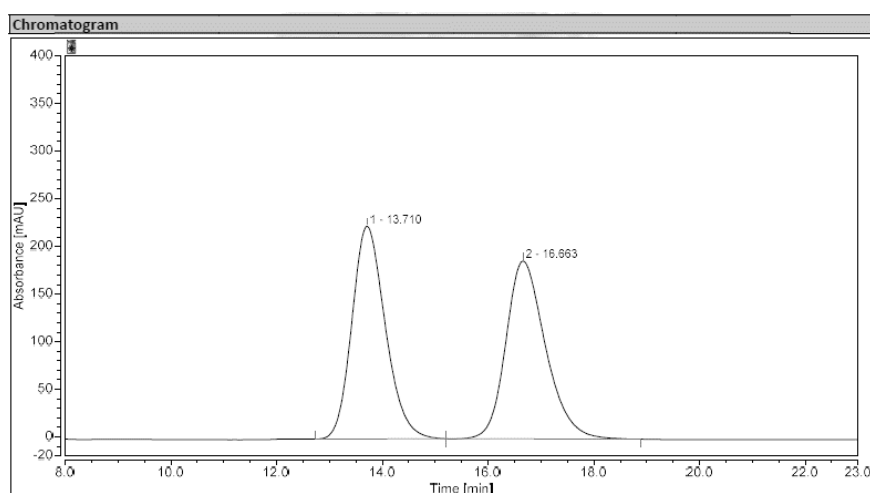

**Integration Results**

| No.           | Peak Name | Retention Time<br>min | Area<br>mAU*min | Height<br>mAU  | Relative Area<br>% | Relative Height<br>% | Amount<br>n.a. |
|---------------|-----------|-----------------------|-----------------|----------------|--------------------|----------------------|----------------|
| 1             |           | 13.710                | 163.721         | 223.291        | 50.19              | 54.45                | n.a.           |
| 2             |           | 16.663                | 162.502         | 186.798        | 49.81              | 45.55                | n.a.           |
| <b>Total:</b> |           |                       | <b>326.223</b>  | <b>410.089</b> | <b>100.00</b>      | <b>100.00</b>        |                |

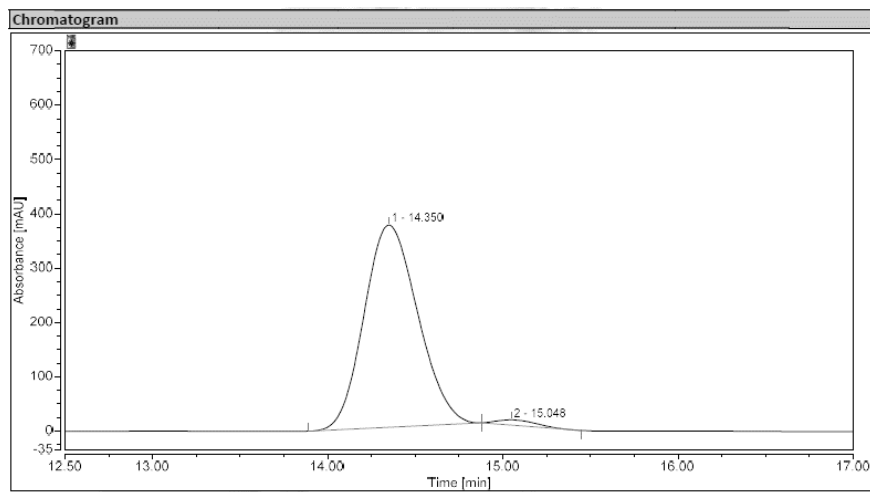

**Integration Results**

| No.           | Peak Name | Retention Time<br>min | Area<br>mAU*min | Height<br>mAU  | Relative Area<br>% | Relative Height<br>% | Amount<br>n.a. |
|---------------|-----------|-----------------------|-----------------|----------------|--------------------|----------------------|----------------|
| 1             |           | 14.350                | 132.238         | 372.220        | 98.08              | 97.45                | n.a.           |
| 2             |           | 15.048                | 2.592           | 9.729          | 1.92               | 2.55                 | n.a.           |
| <b>Total:</b> |           |                       | <b>134.830</b>  | <b>381.949</b> | <b>100.00</b>      | <b>100.00</b>        |                |

**Supplementary Figure 106.** HPLC spectrum for compound **3fb**

**3fc: IE**, *i*-PrOH/hexane = 20/80,  $v = 1.0$  mL/min,  $\lambda = 254$  nm

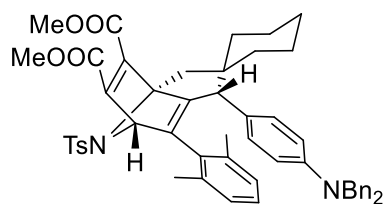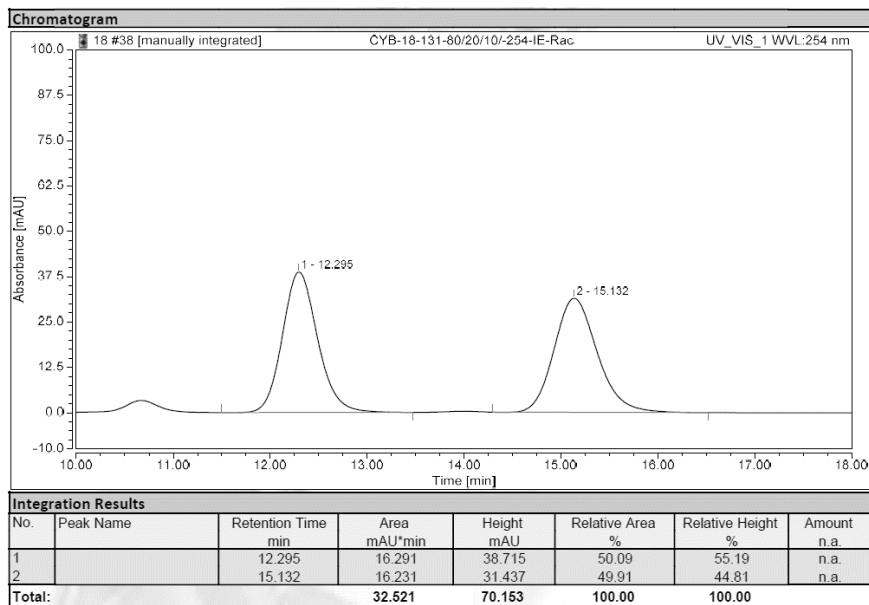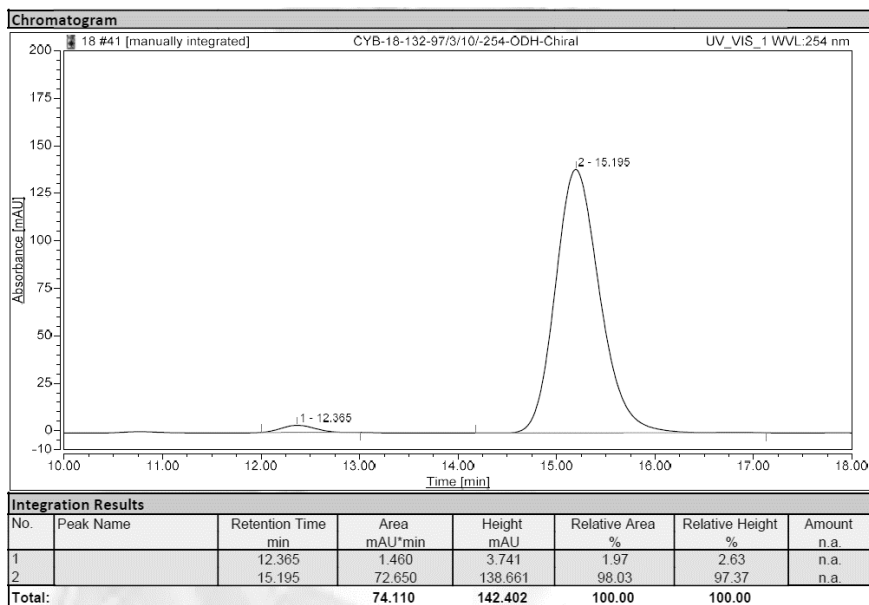

**Supplementary Figure 107.** HPLC spectrum for compound **3fc**

# 9. NMR Spectra

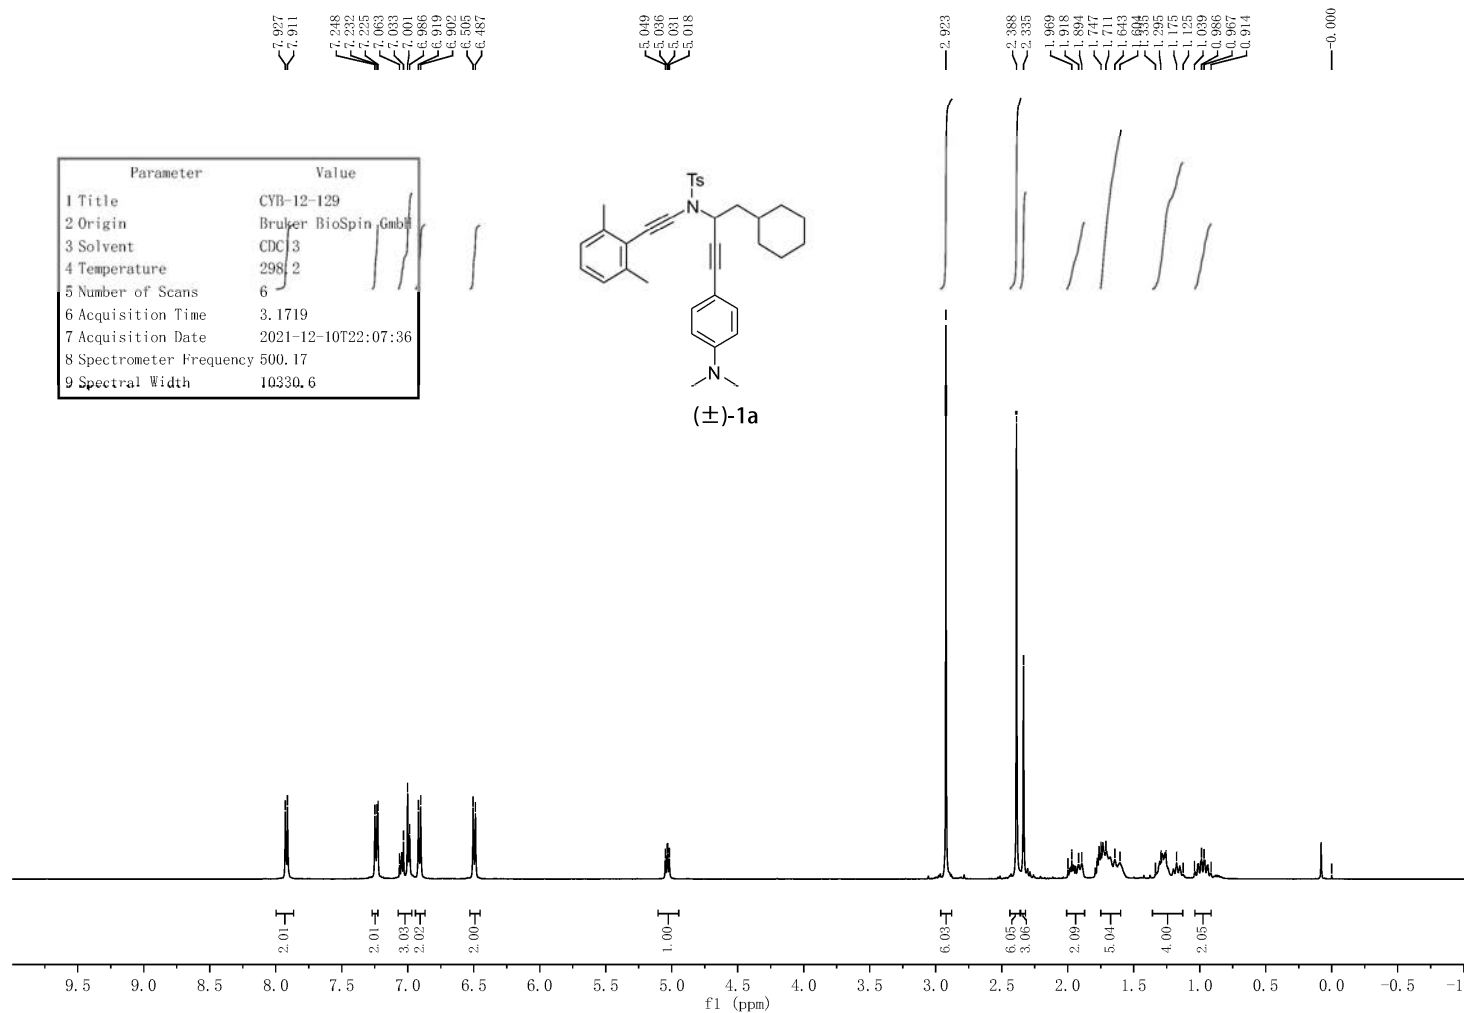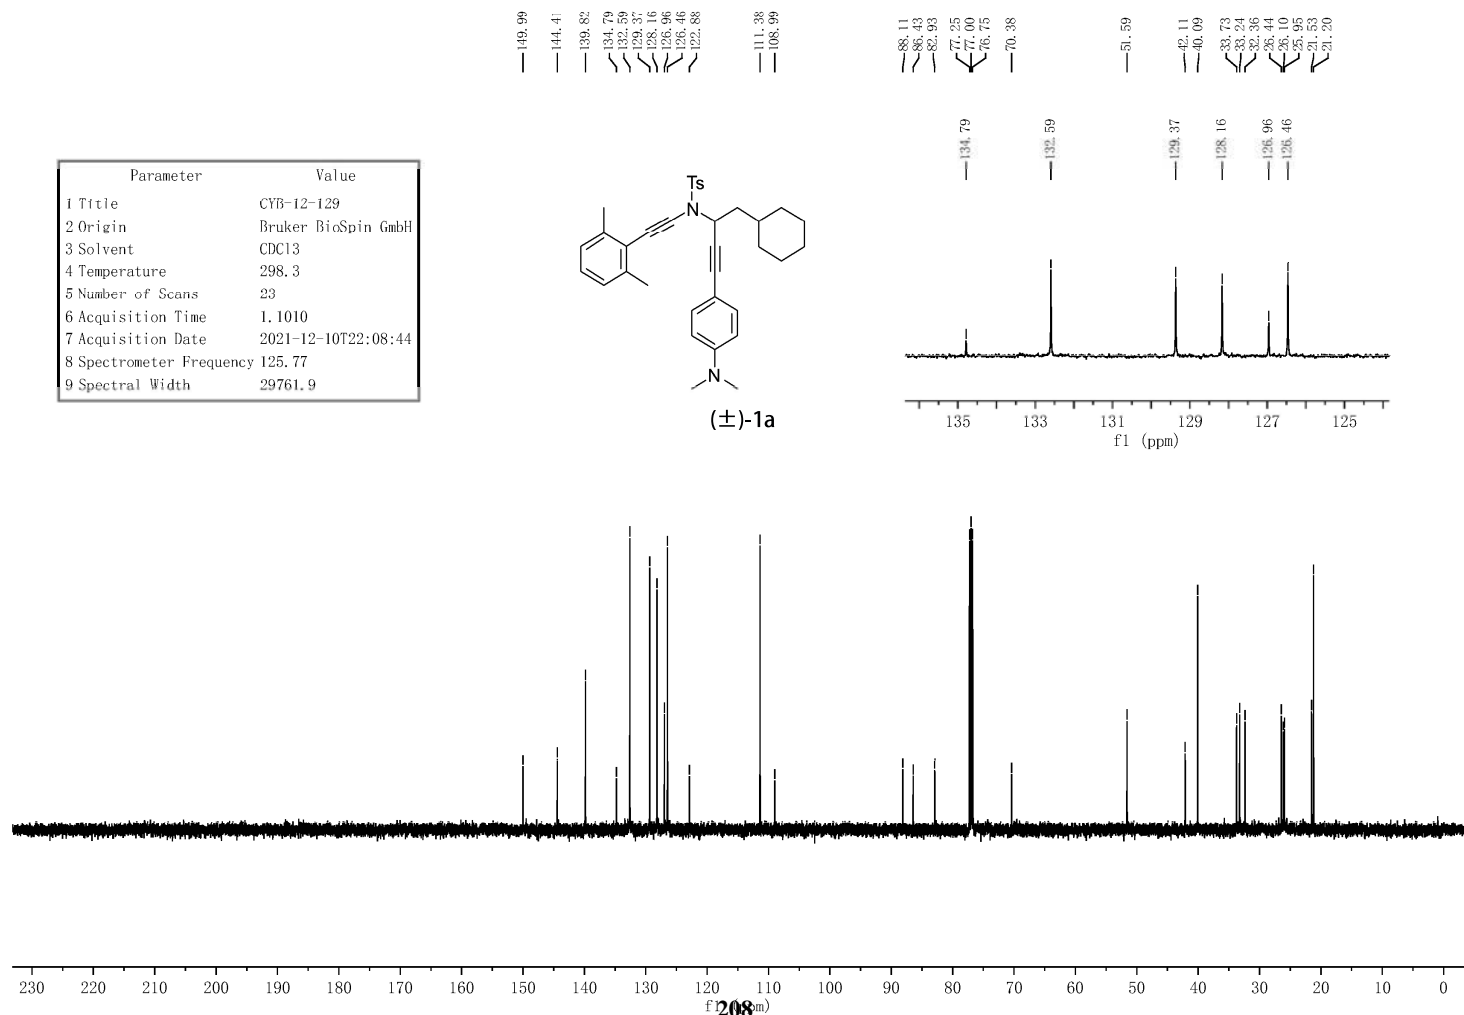

Supplementary Figure 108. <sup>1</sup>H and <sup>13</sup>C NMR spectra for (±)-1a



132.69  
129.47  
128.27  
127.06  
126.56

111.48

51.69

49.22  
46.19

38.83  
38.34  
32.46  
26.54  
26.20  
21.63  
21.30

| Parameter                | Value               |
|--------------------------|---------------------|
| 1 Title                  | CYB-12-129          |
| 2 Origin                 | Bruker BioSpin GmbH |
| 3 Solvent                | CDCl3               |
| 4 Temperature            | 298.6               |
| 5 Number of Scans        | 8                   |
| 6 Acquisition Time       | 1.1010              |
| 7 Acquisition Date       | 2021-12-10T22:10:56 |
| 8 Spectrometer Frequency | 125.77              |
| 9 Spectral Width         | 29761.9             |

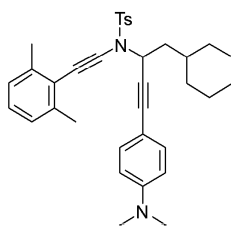

(±)-1a

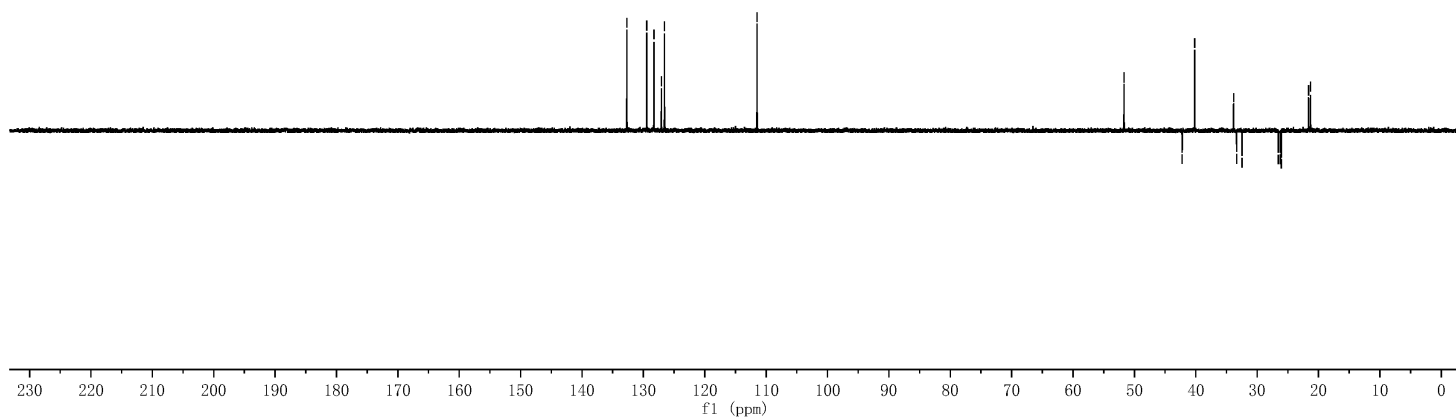

Supplementary Figure 109. DEPT-135 NMR spectra for (±)-1a

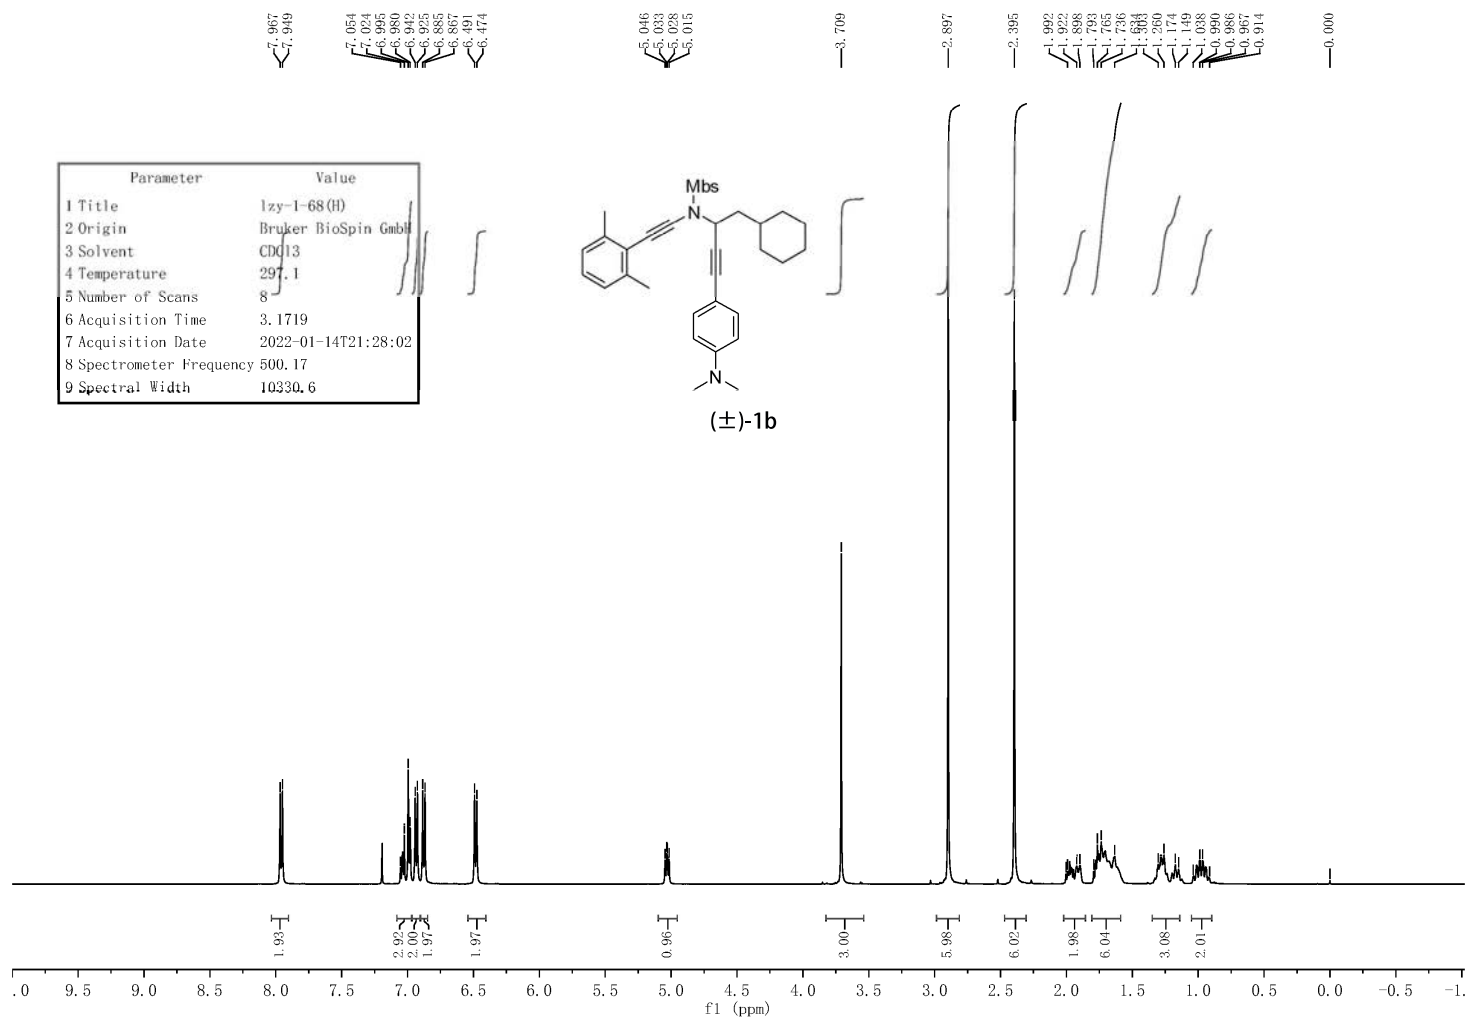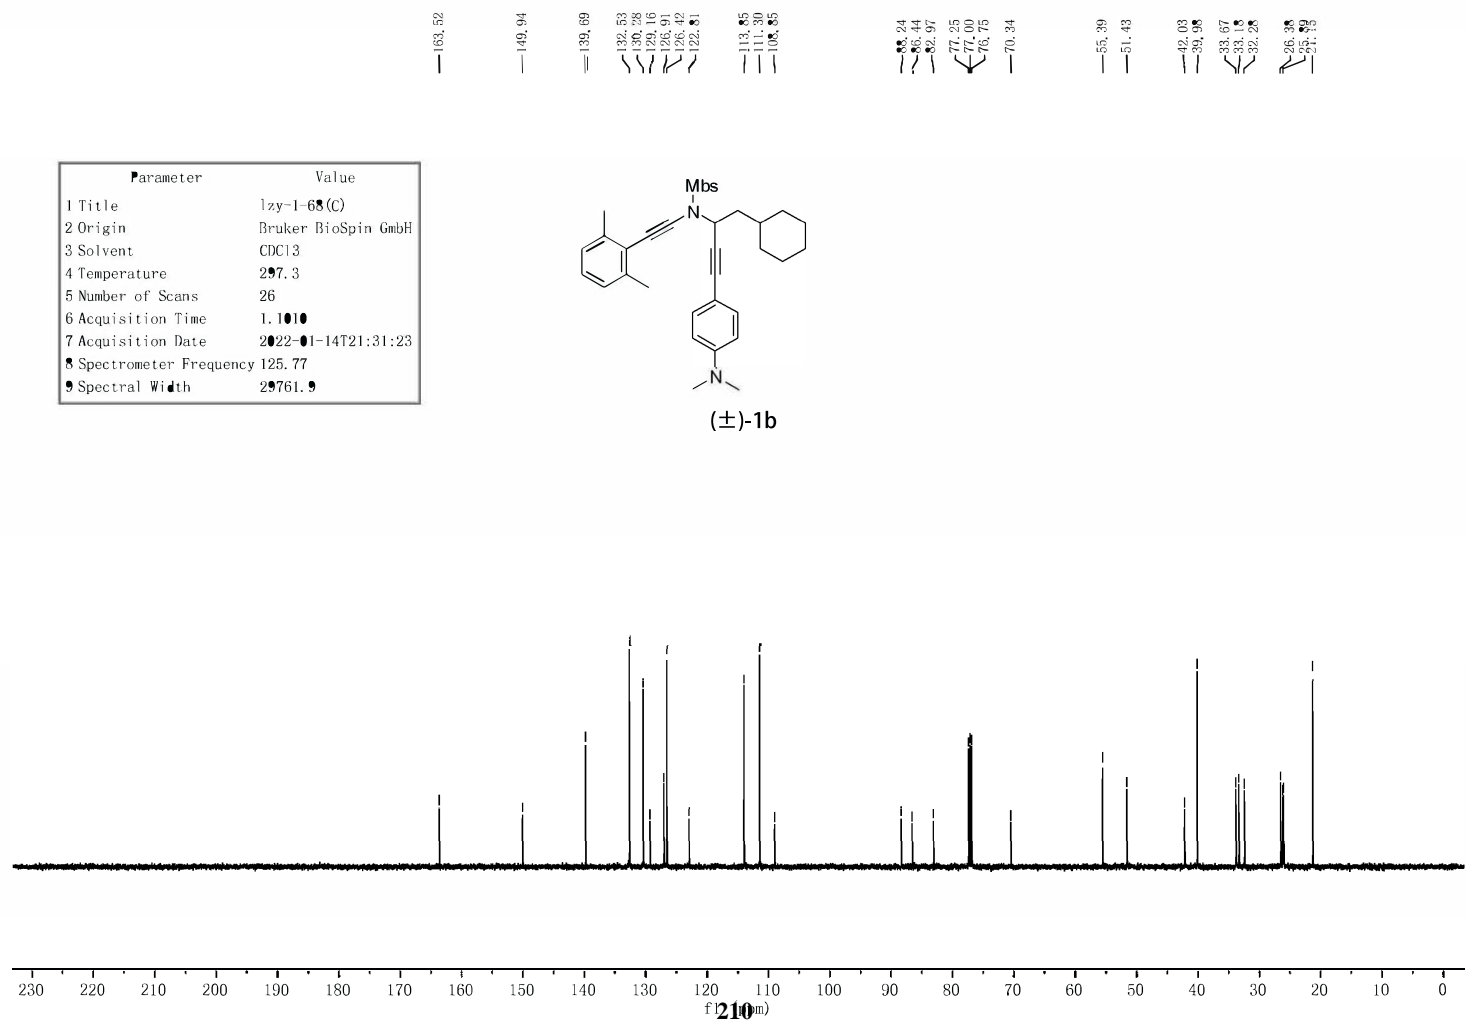

Supplementary Figure 110. <sup>1</sup>H and <sup>13</sup>C NMR spectra for (±)-1b

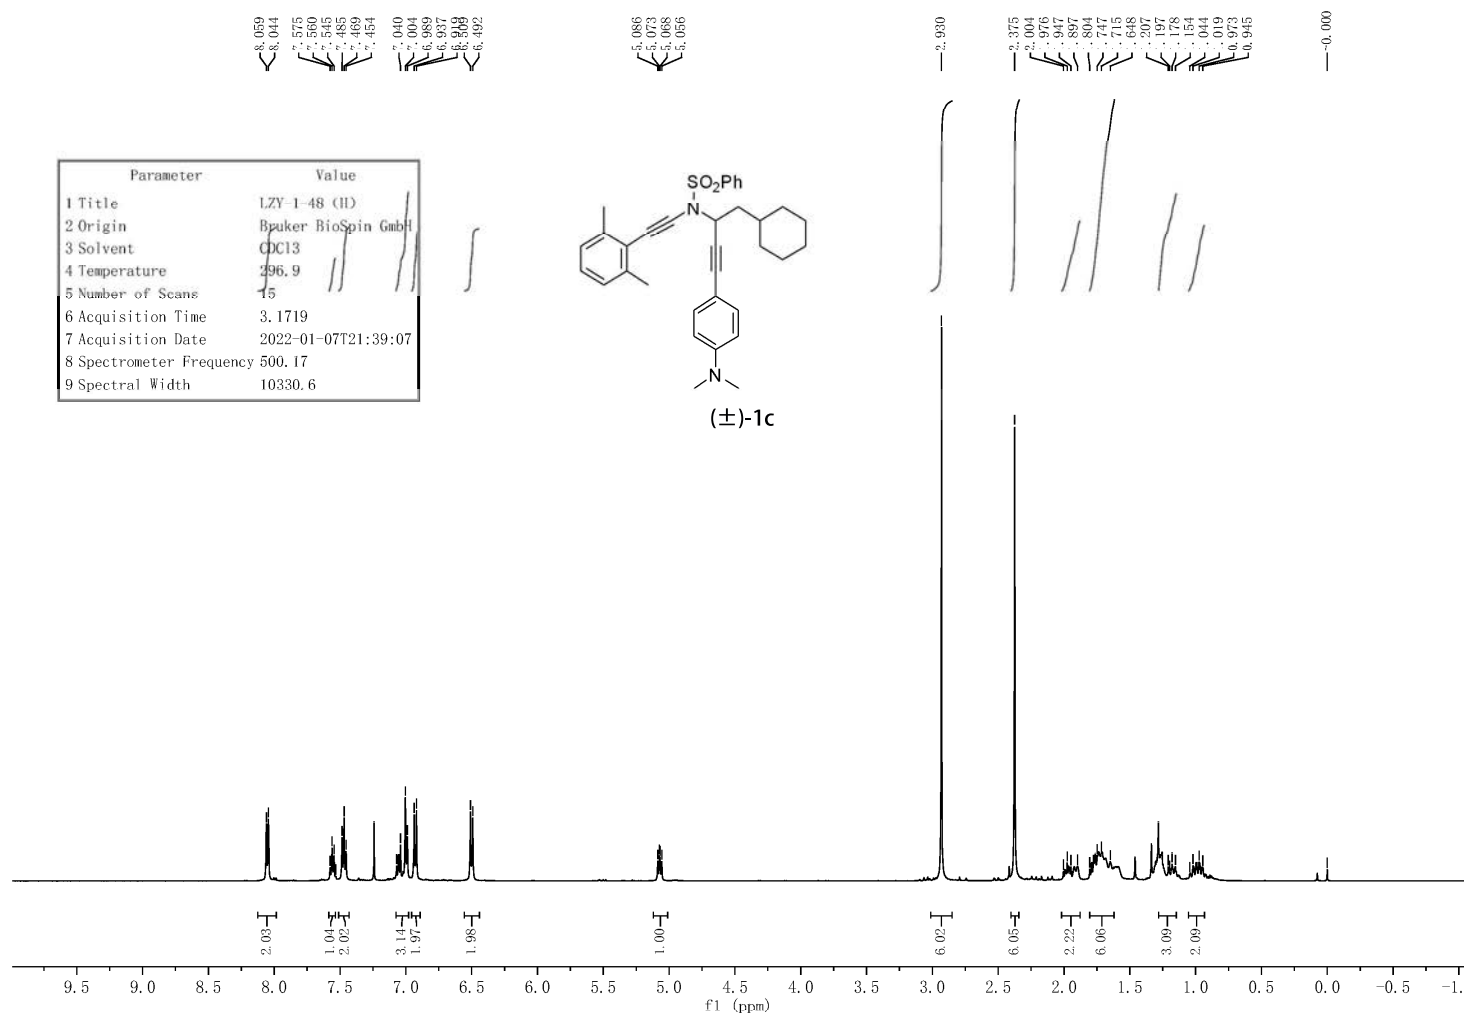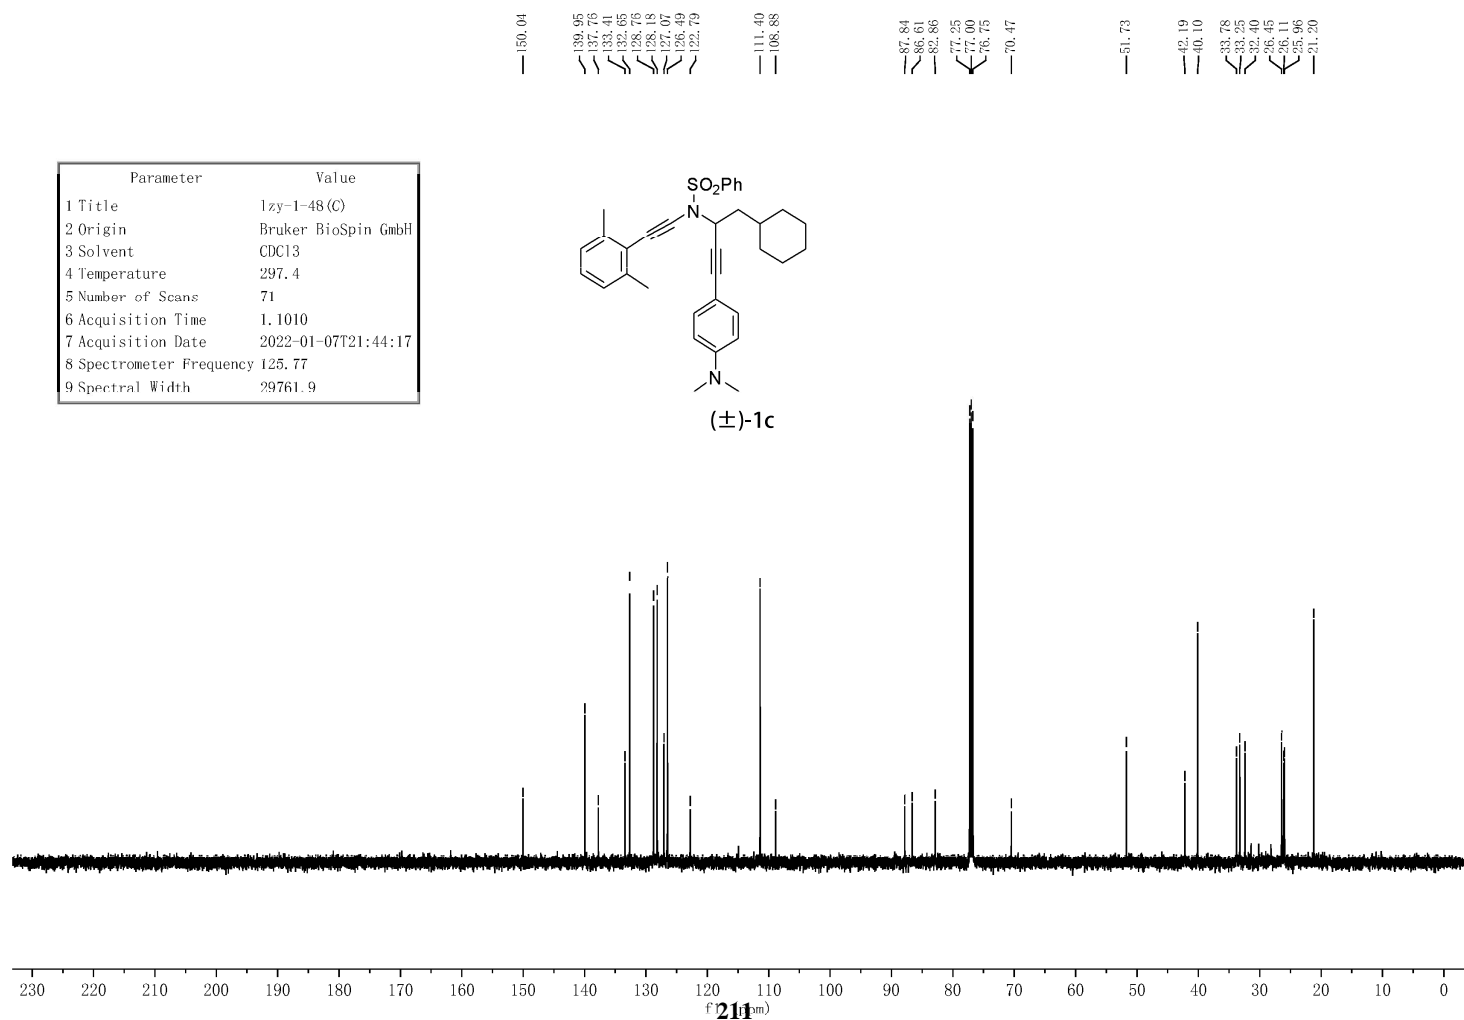

Supplementary Figure 11.  $^1\text{H}$  and  $^{13}\text{C}$  NMR spectra for **(±)-1c**

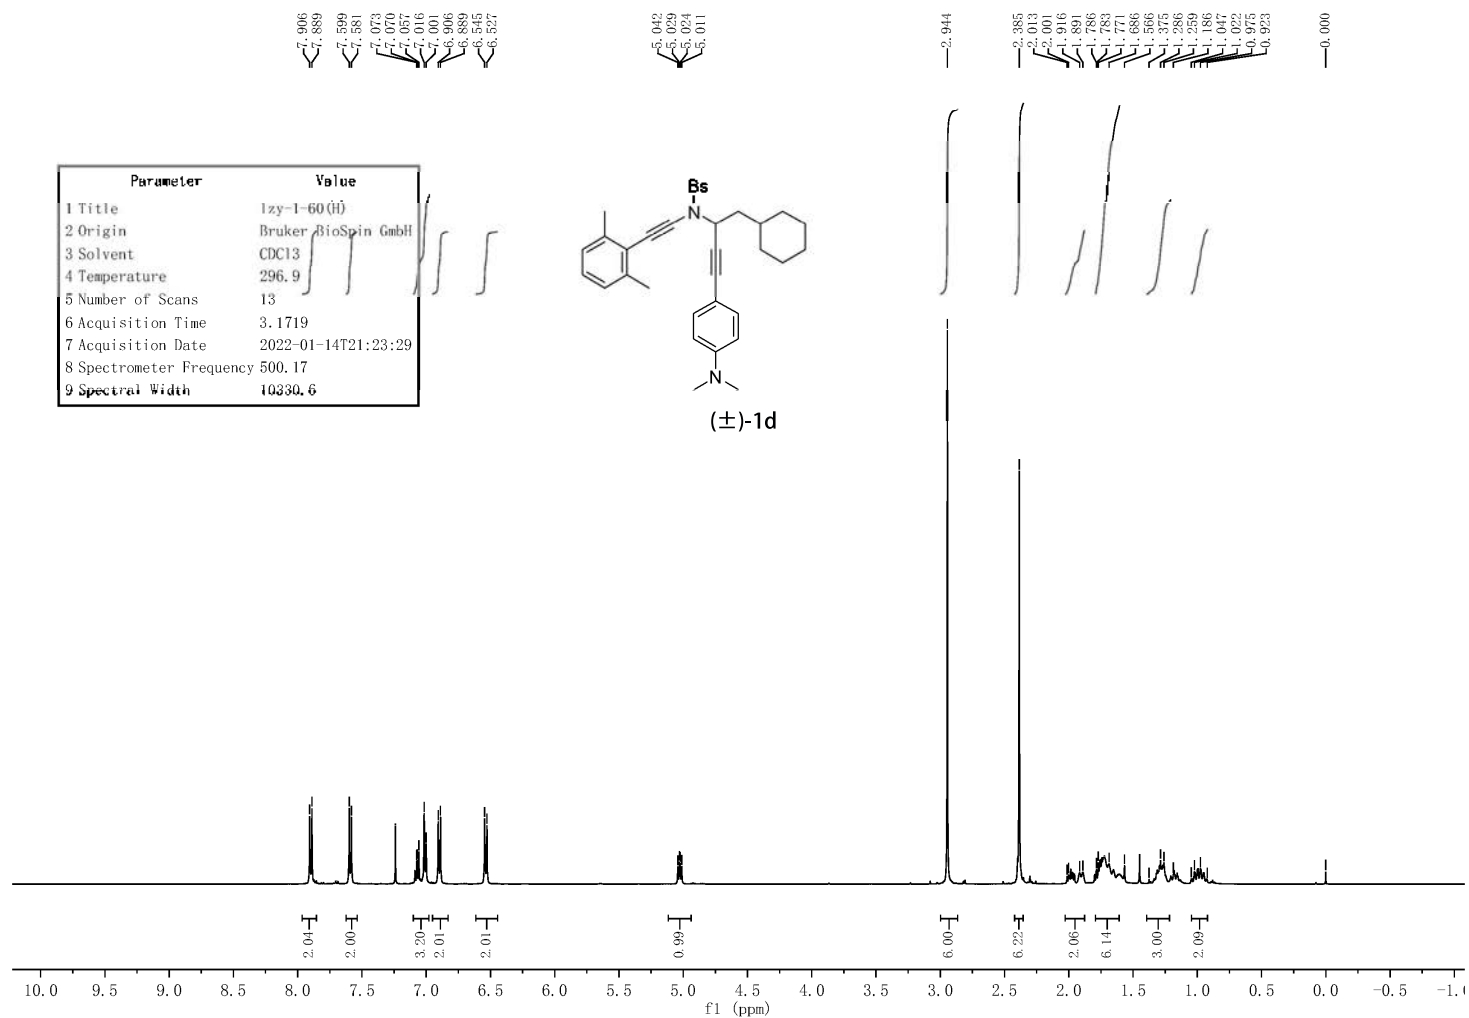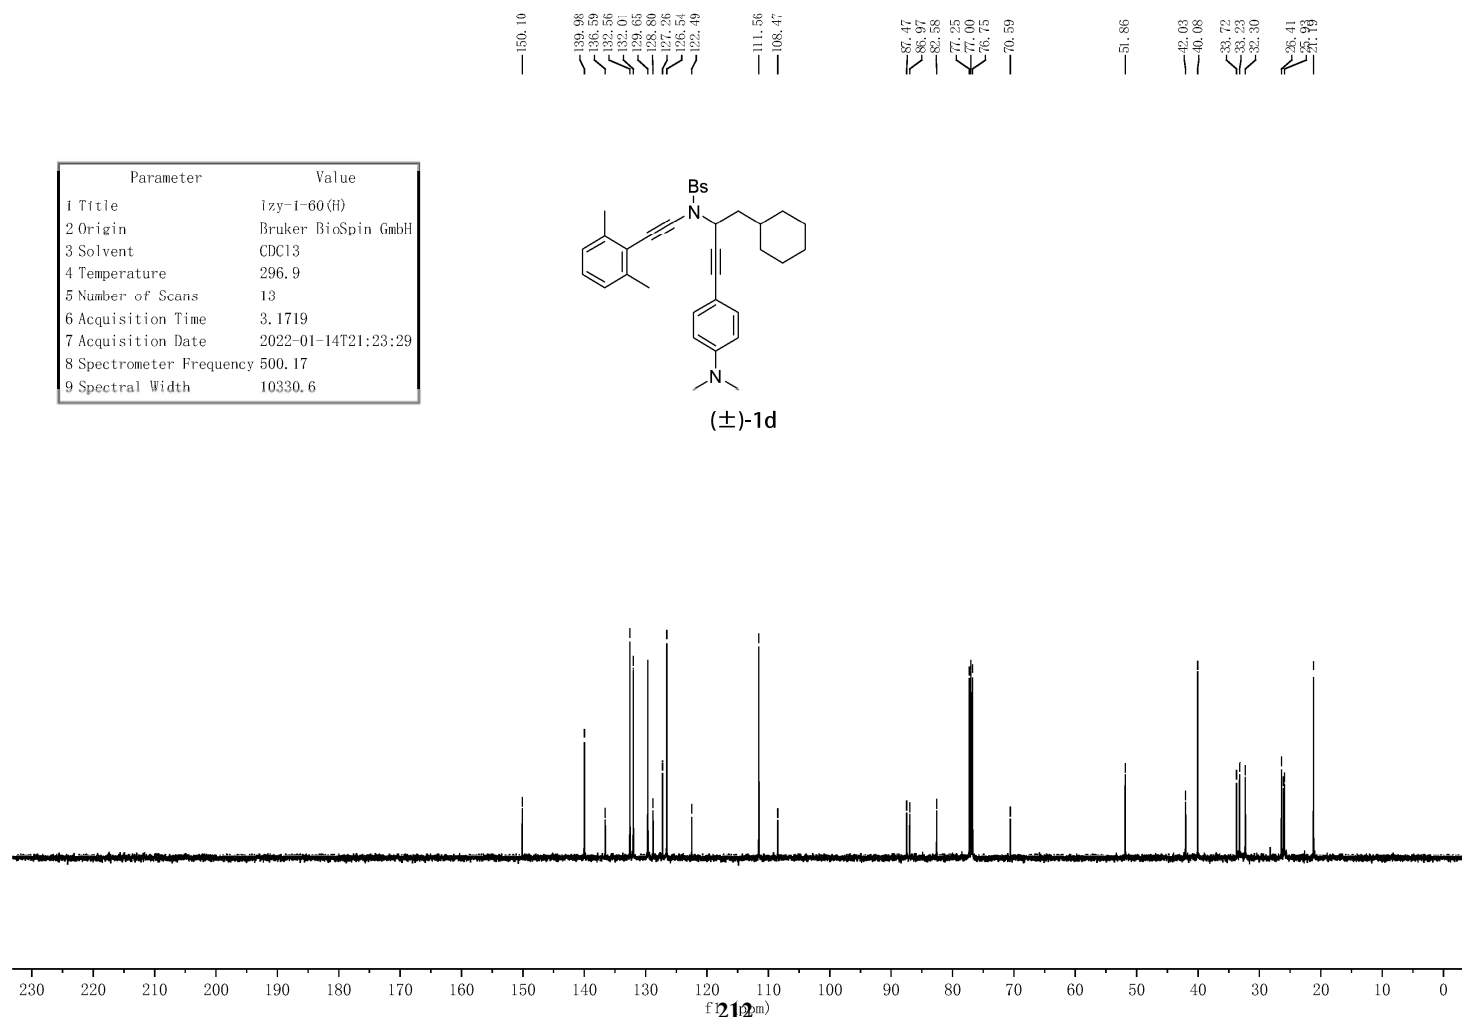

Supplementary Figure 112. <sup>1</sup>H and <sup>13</sup>C NMR spectra for (±)-1d

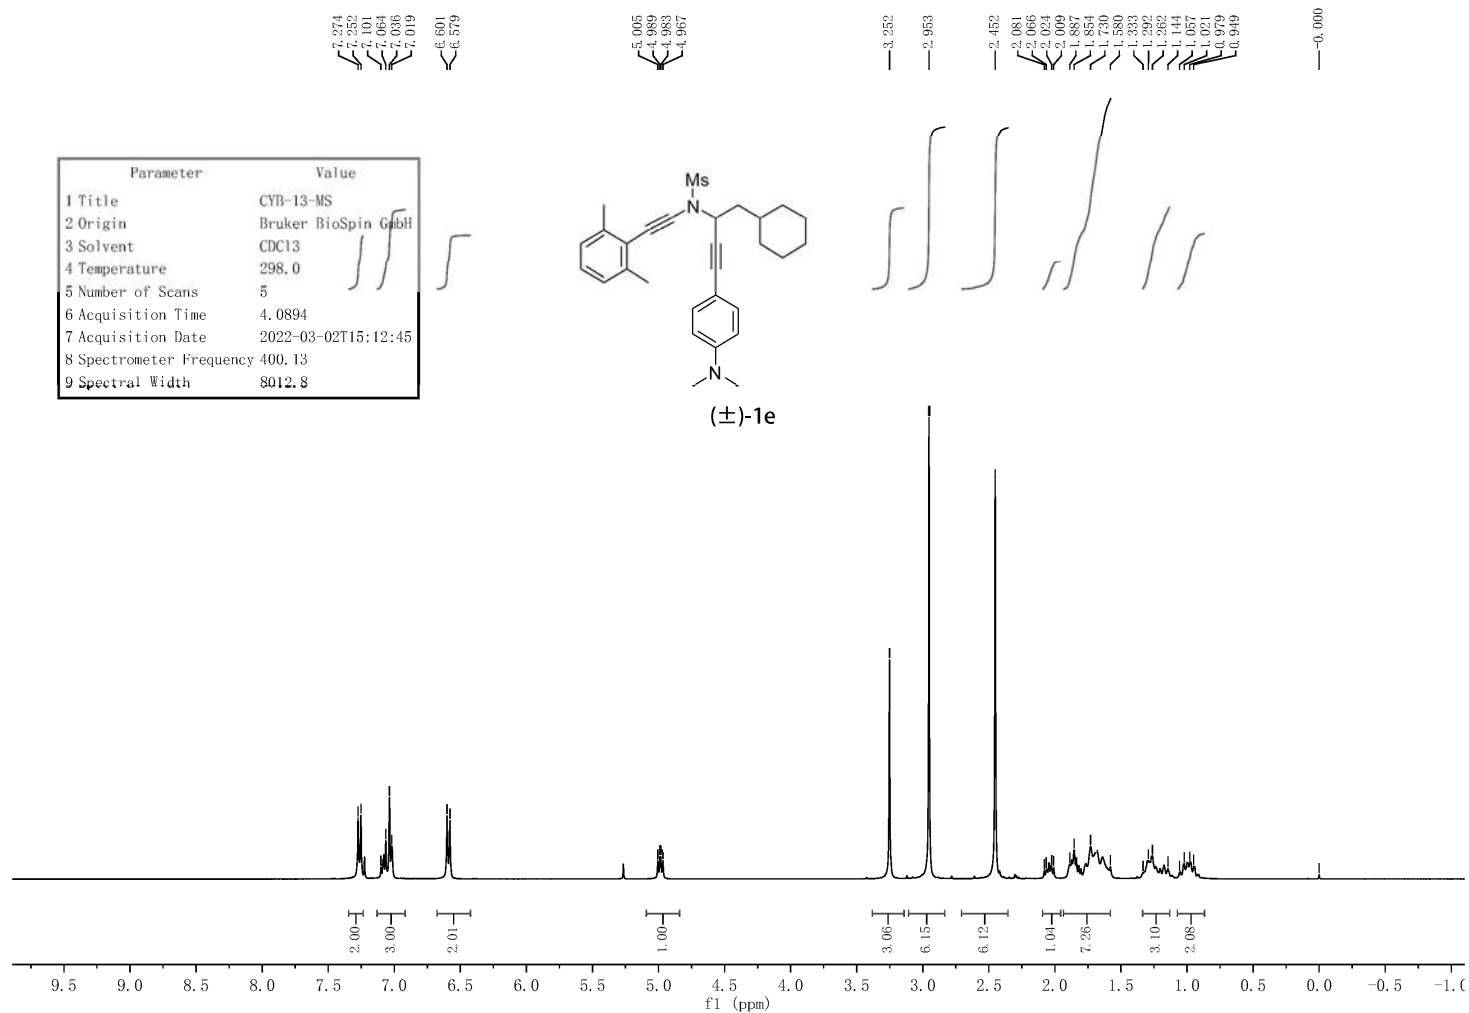

| Parameter                | Value               |
|--------------------------|---------------------|
| 1 Title                  | CYB-13-MS           |
| 2 Origin                 | Bruker BioSpin GmbH |
| 3 Solvent                | CDCl3               |
| 4 Temperature            | 298.0               |
| 5 Number of Scans        | 5                   |
| 6 Acquisition Time       | 4.0894              |
| 7 Acquisition Date       | 2022-03-02T15:12:45 |
| 8 Spectrometer Frequency | 400.13              |
| 9 Spectral Width         | 8012.8              |

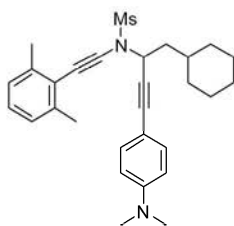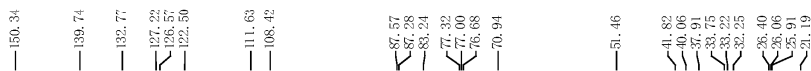

| Parameter                | Value               |
|--------------------------|---------------------|
| 1 Title                  | CYB-13-MS           |
| 2 Origin                 | Bruker BioSpin GmbH |
| 3 Solvent                | CDCl3               |
| 4 Temperature            | 298.0               |
| 5 Number of Scans        | 5                   |
| 6 Acquisition Time       | 4.0894              |
| 7 Acquisition Date       | 2022-03-02T15:12:45 |
| 8 Spectrometer Frequency | 400.13              |
| 9 Spectral Width         | 8012.8              |

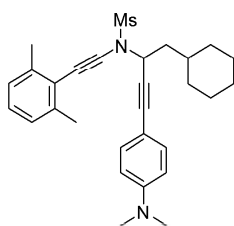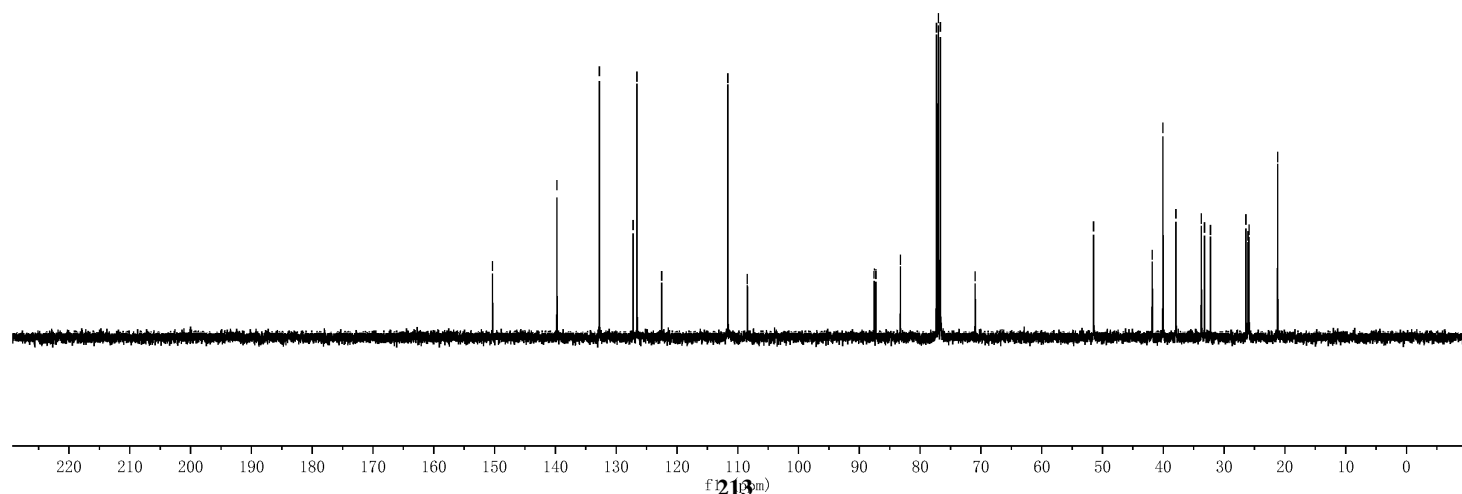

Supplementary Figure 113. <sup>1</sup>H and <sup>13</sup>C NMR spectra for (±)-1e

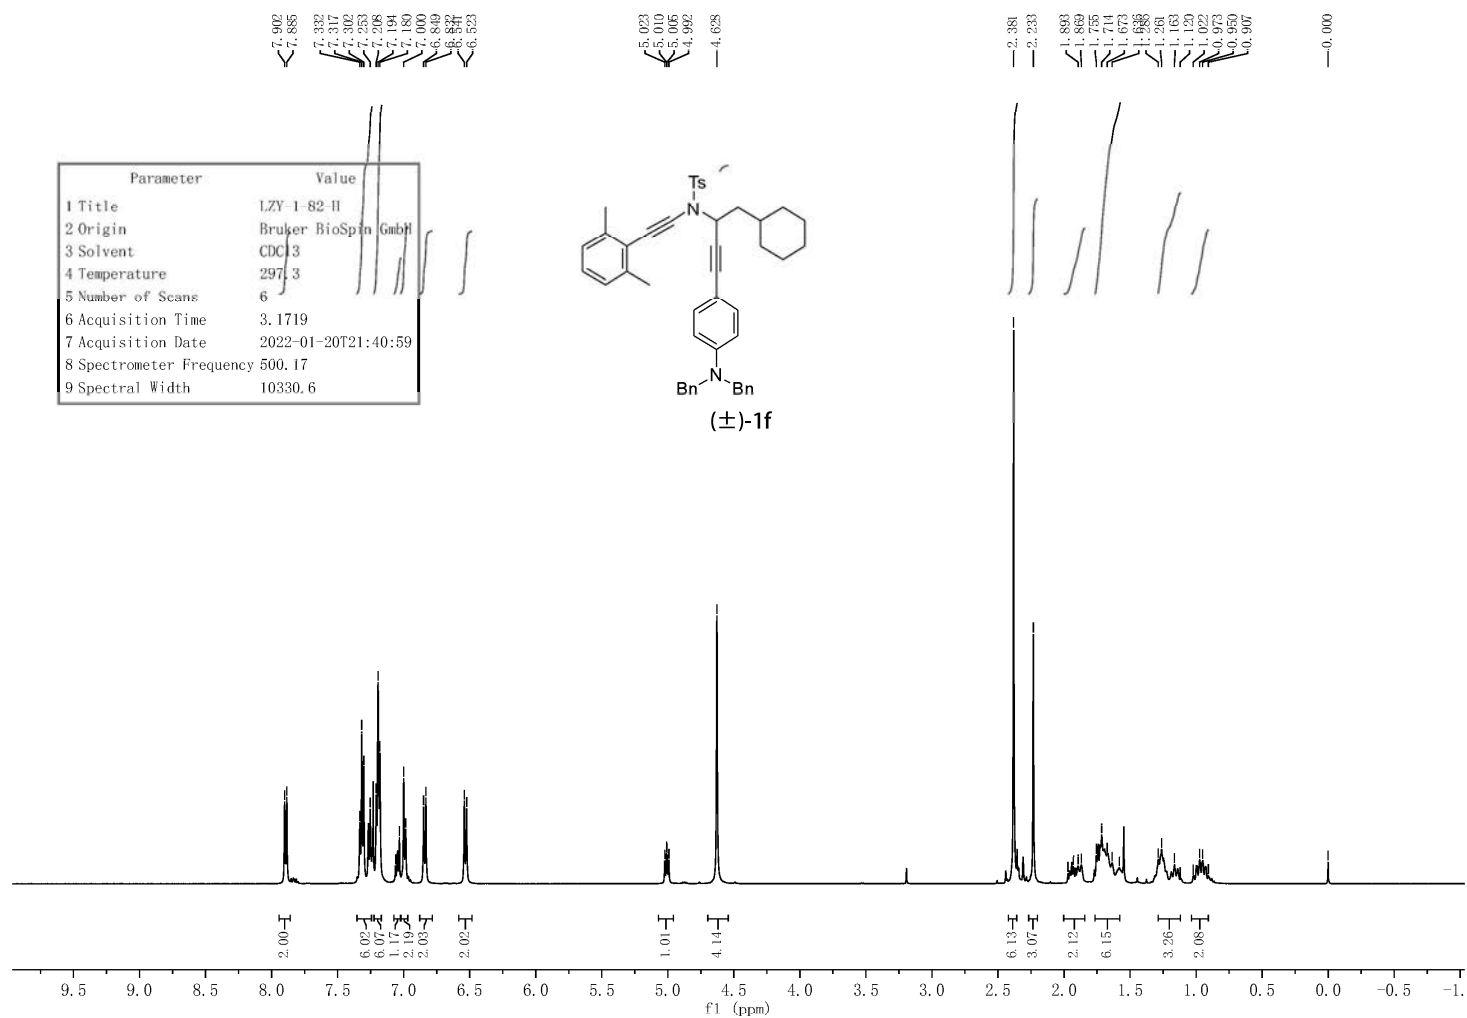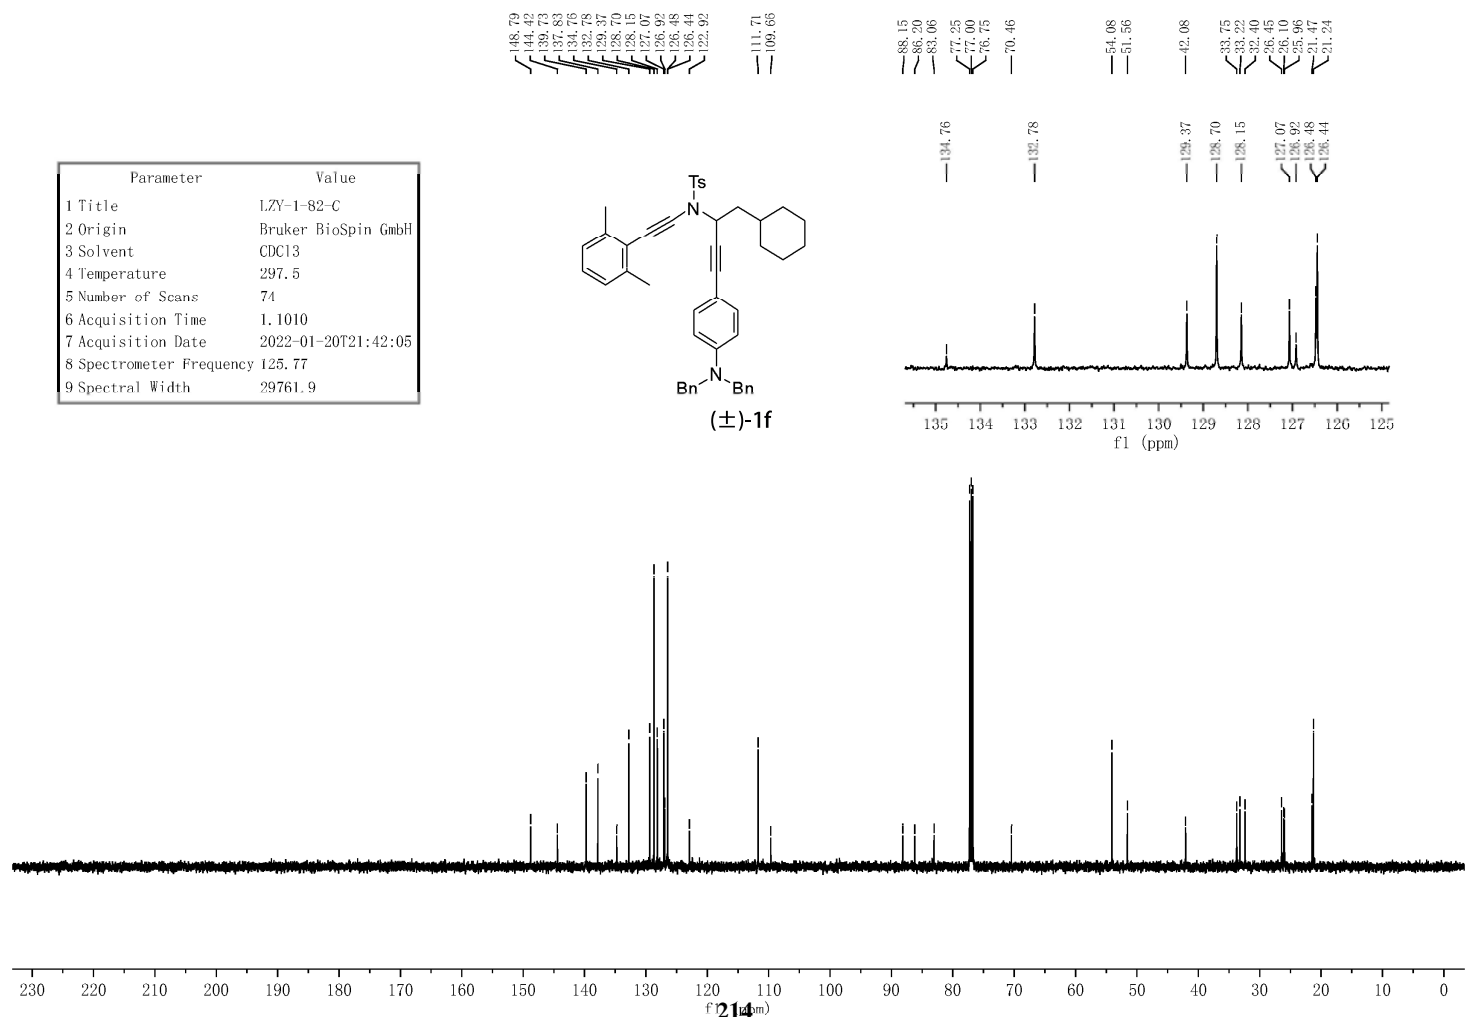

Supplementary Figure 114. <sup>1</sup>H and <sup>13</sup>C NMR spectra for (±)-1f

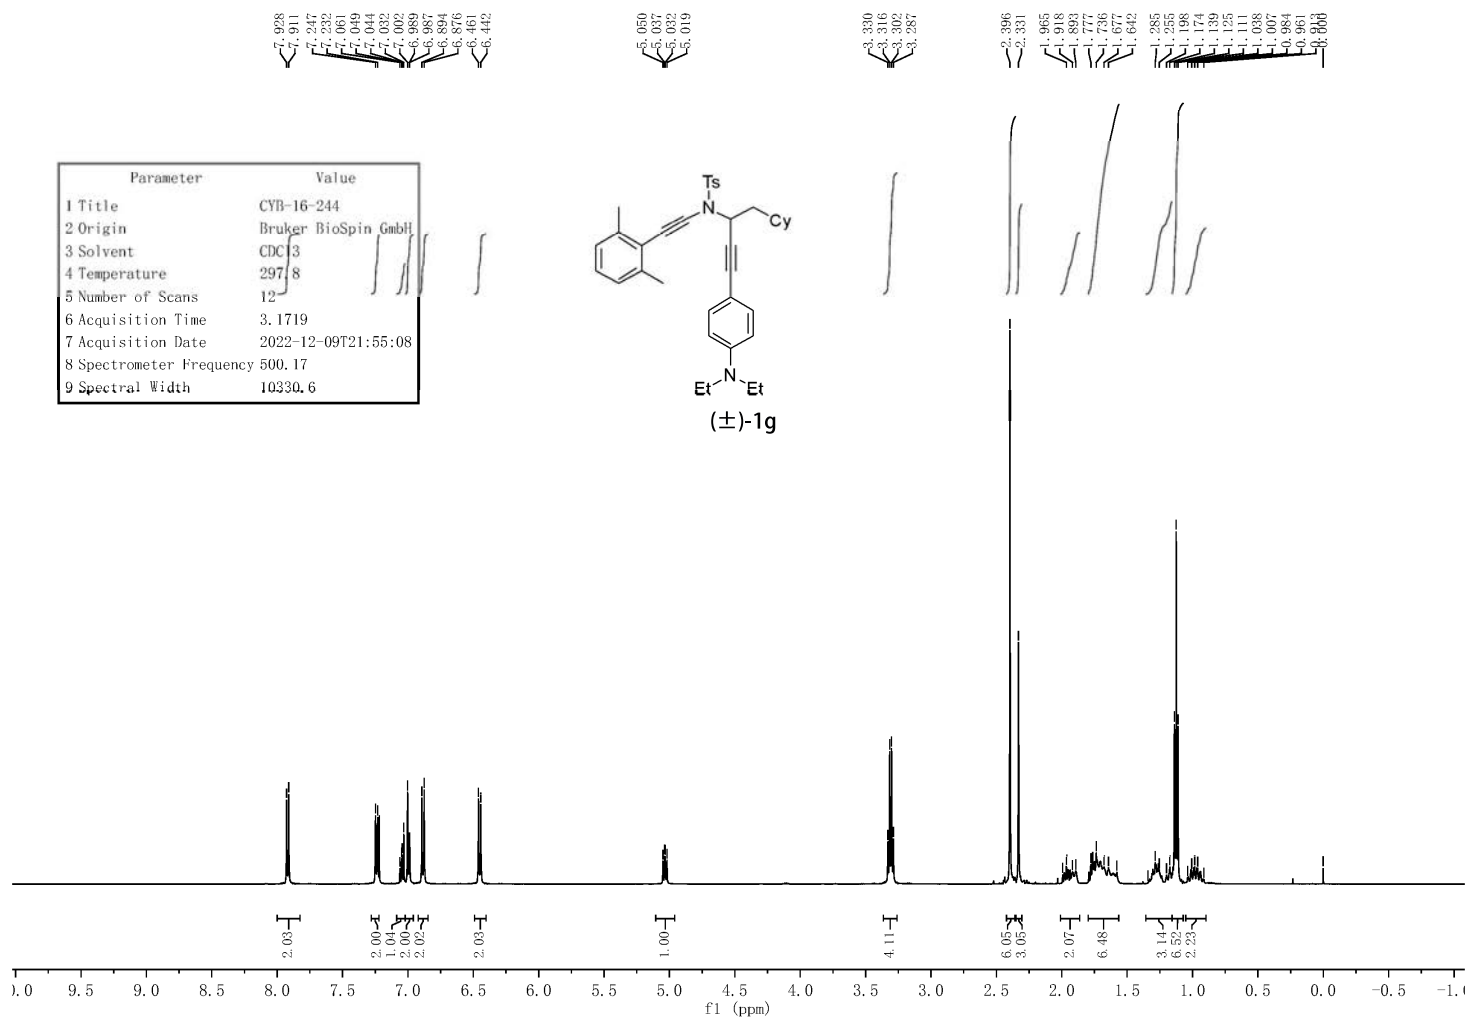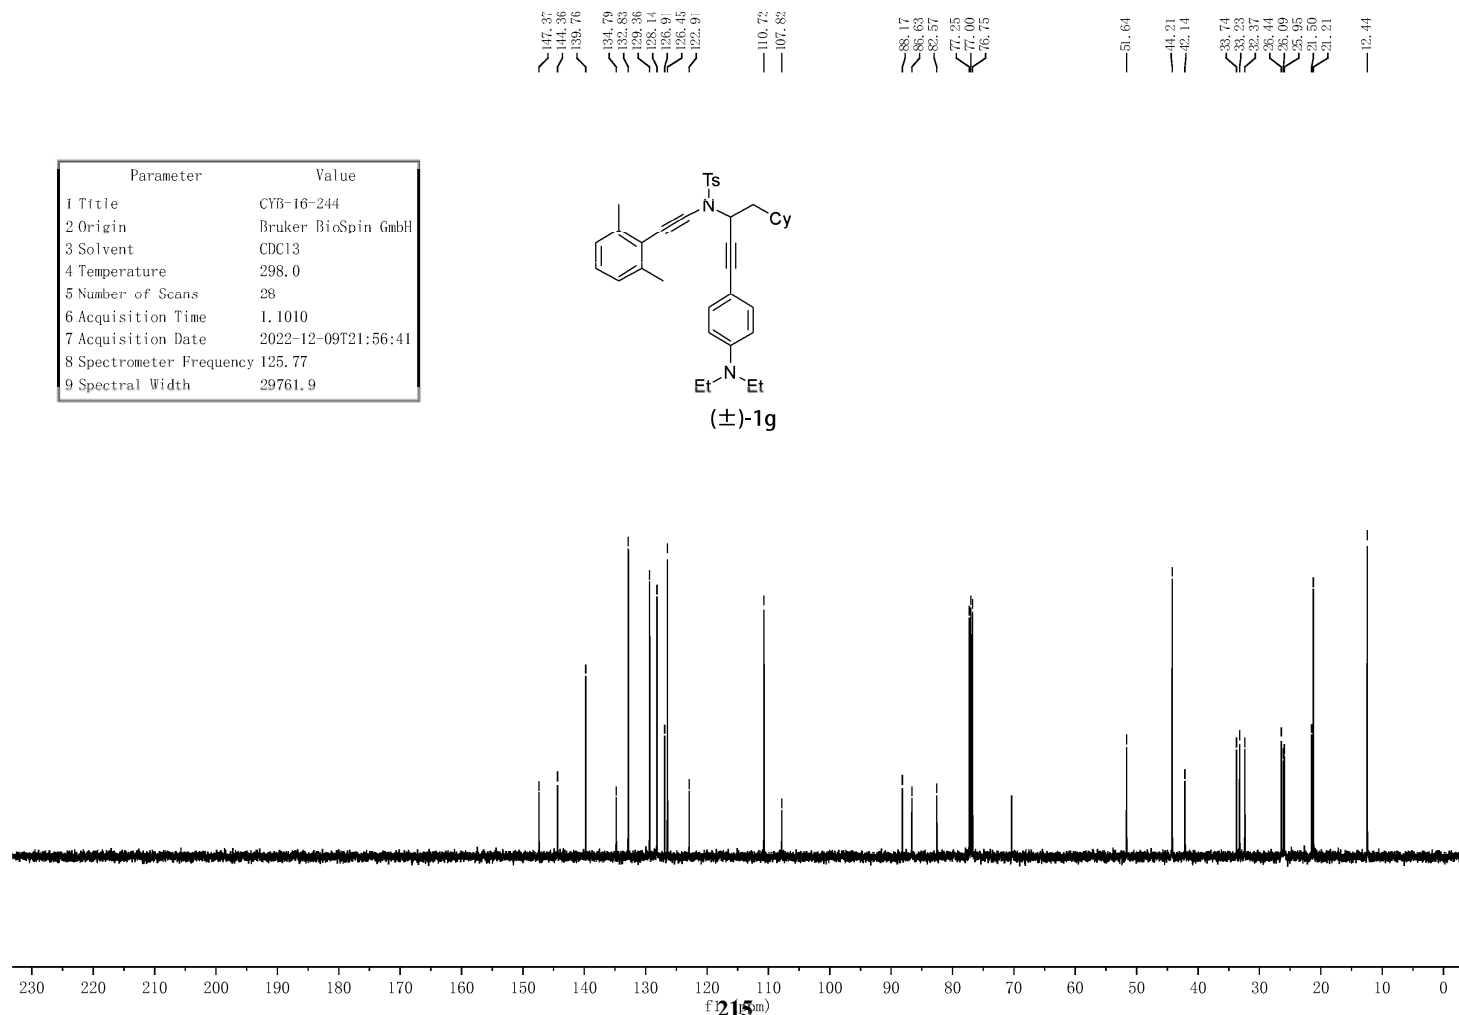

Supplementary Figure 115. <sup>1</sup>H and <sup>13</sup>C NMR spectra for (±)-1g

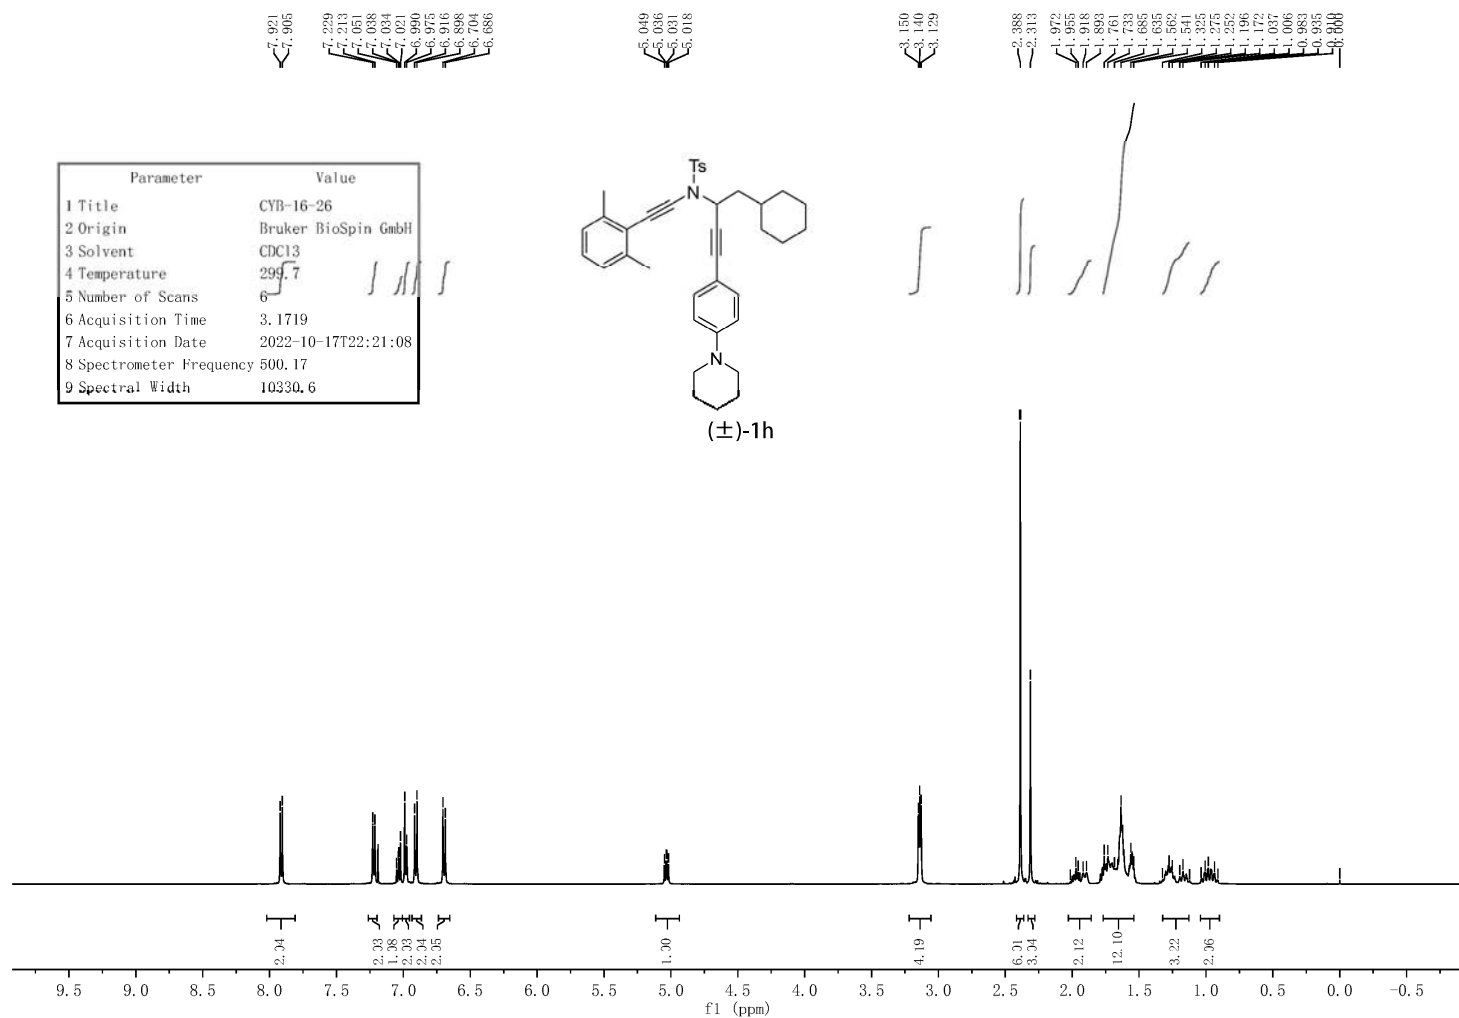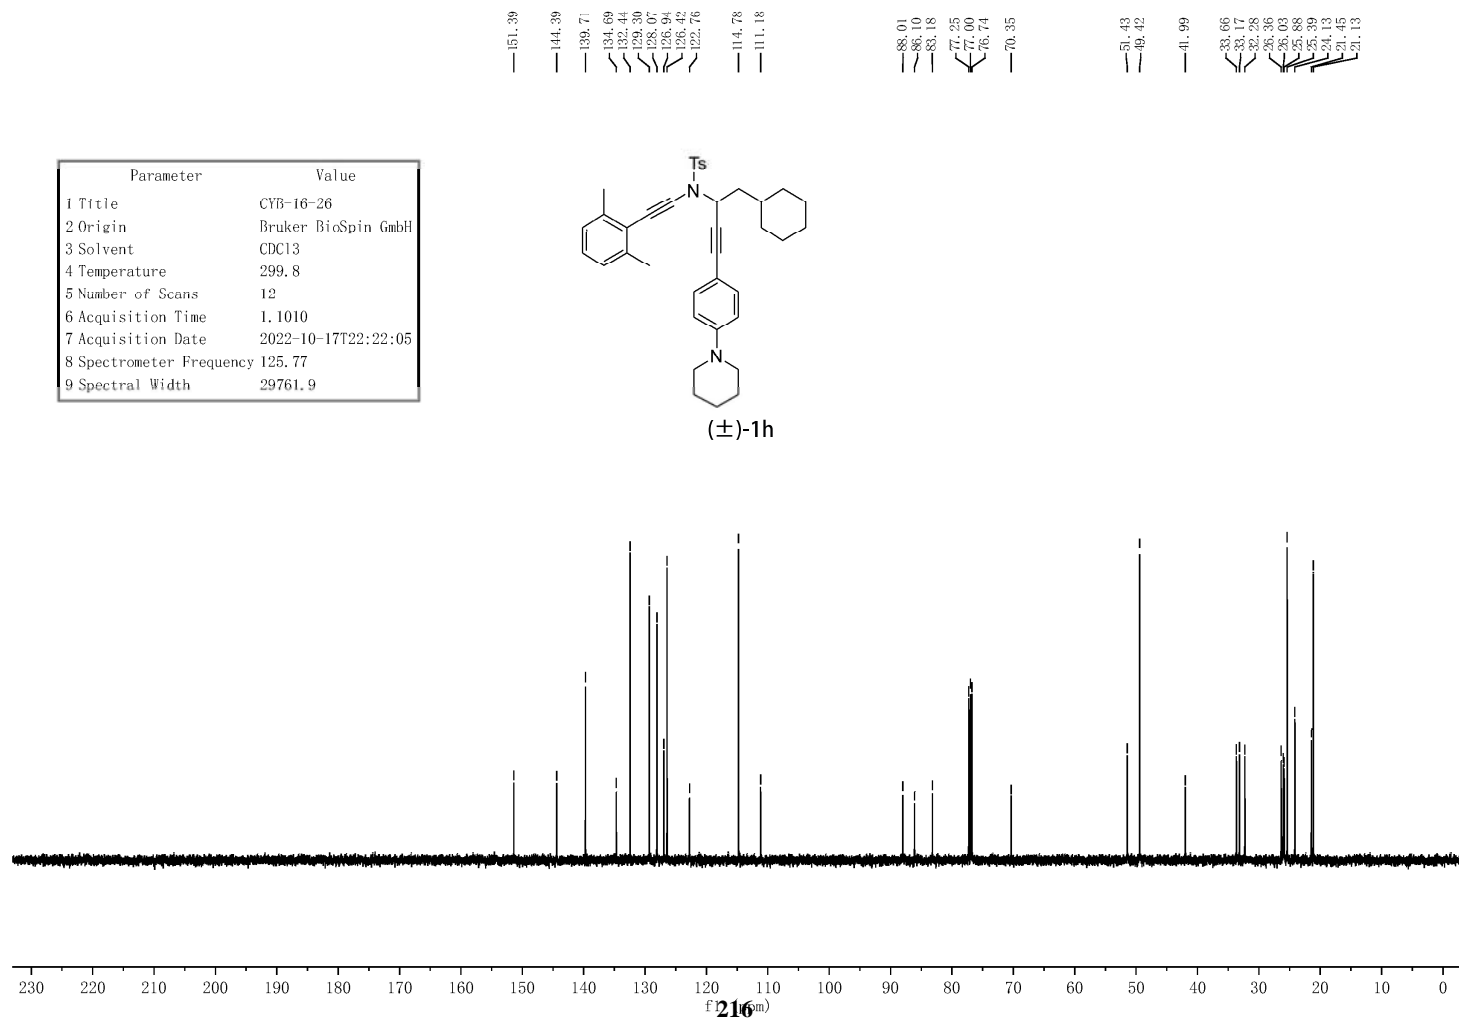

Supplementary Figure 116. <sup>1</sup>H and <sup>13</sup>C NMR spectra for (±)-1h



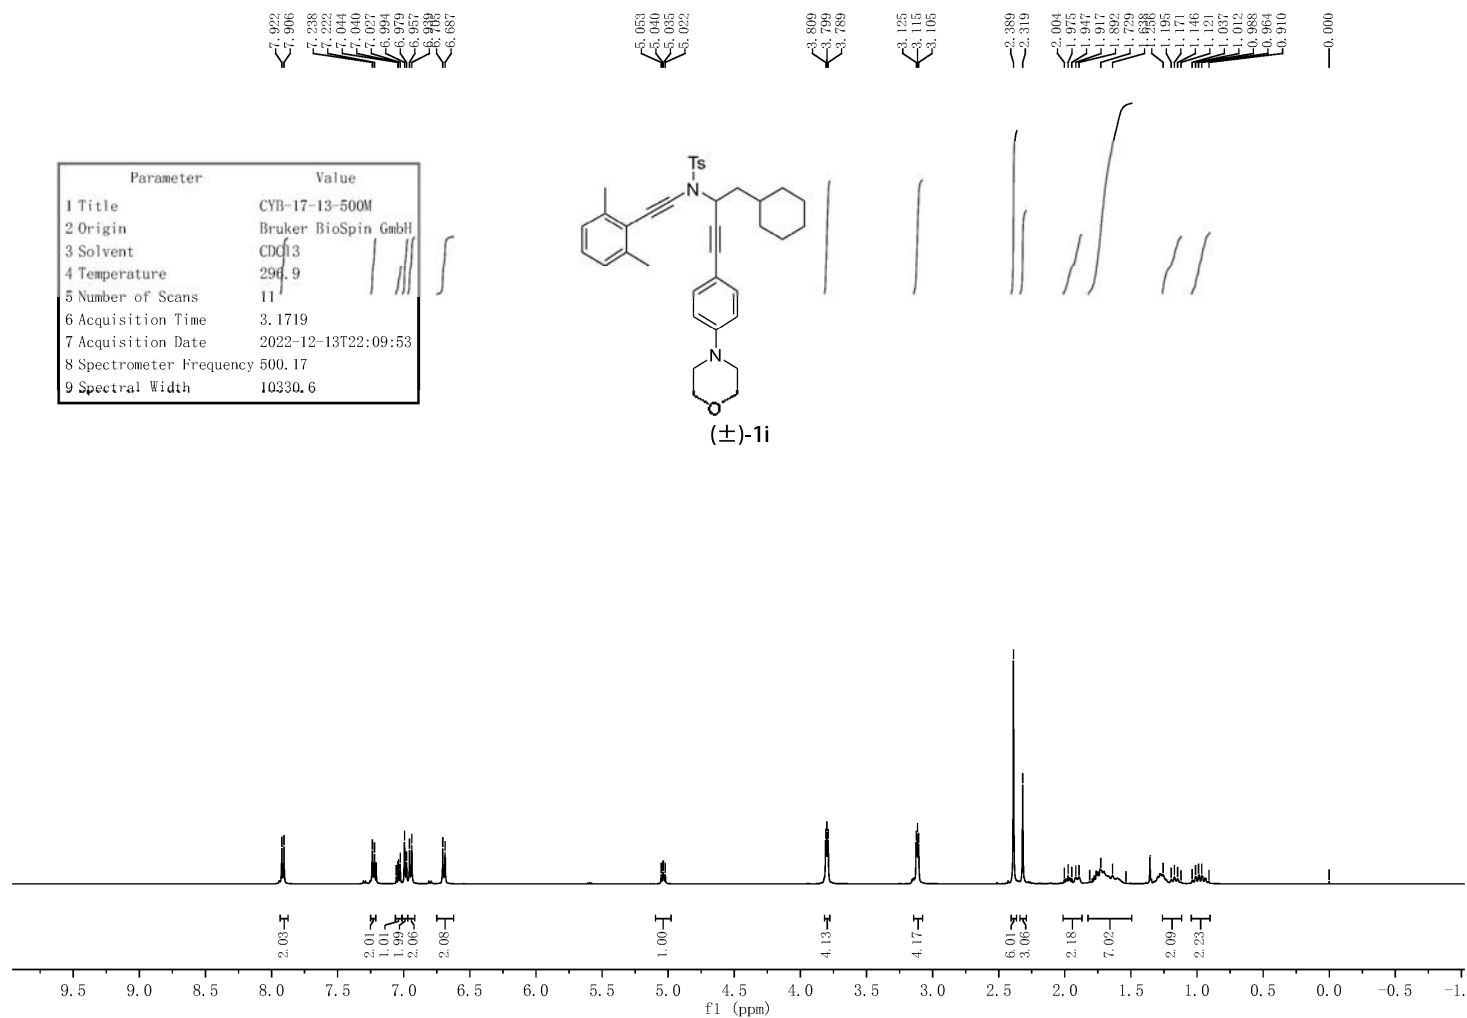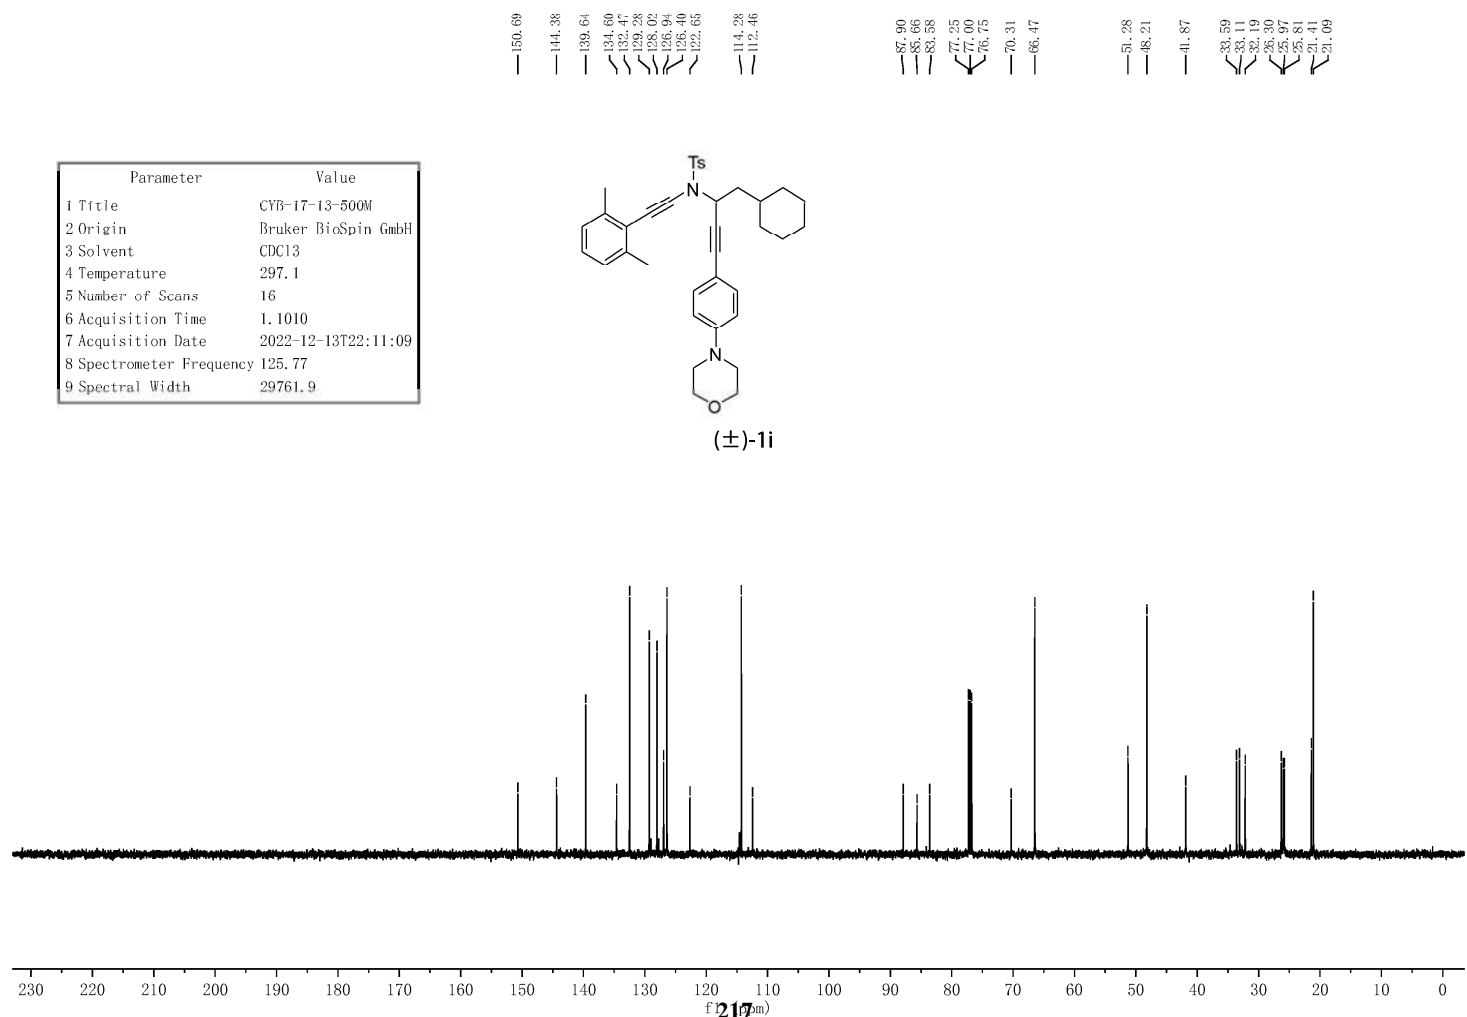

Supplementary Figure 117. <sup>1</sup>H and <sup>13</sup>C NMR spectra for (±)-1i

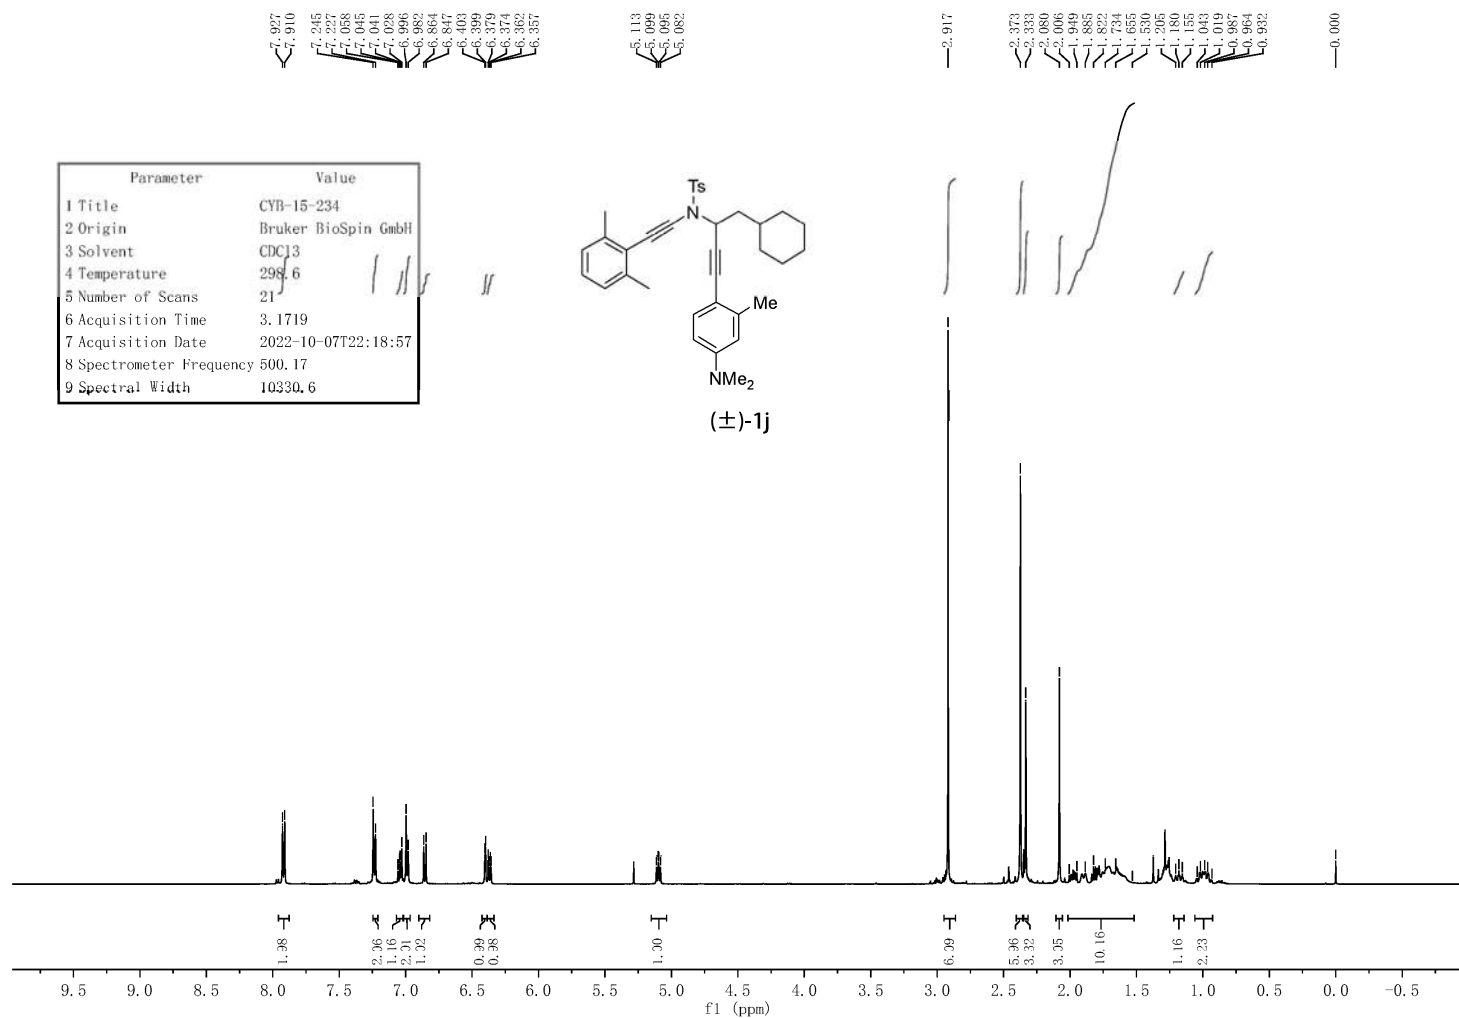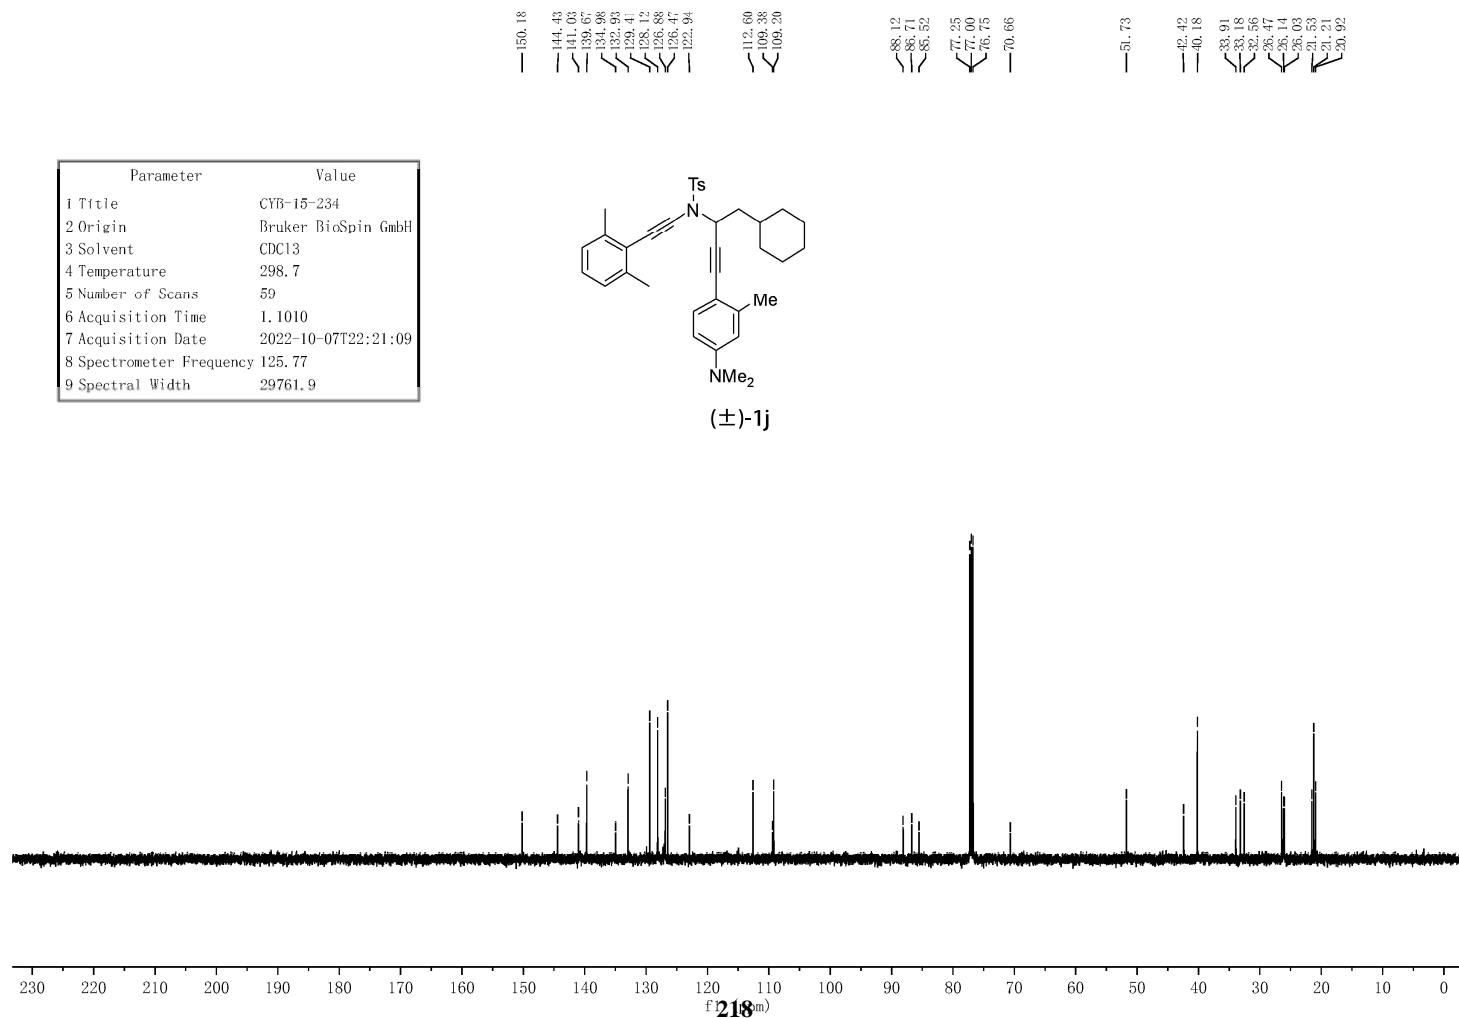

Supplementary Figure 118. <sup>1</sup>H and <sup>13</sup>C NMR spectra for (±)-1j

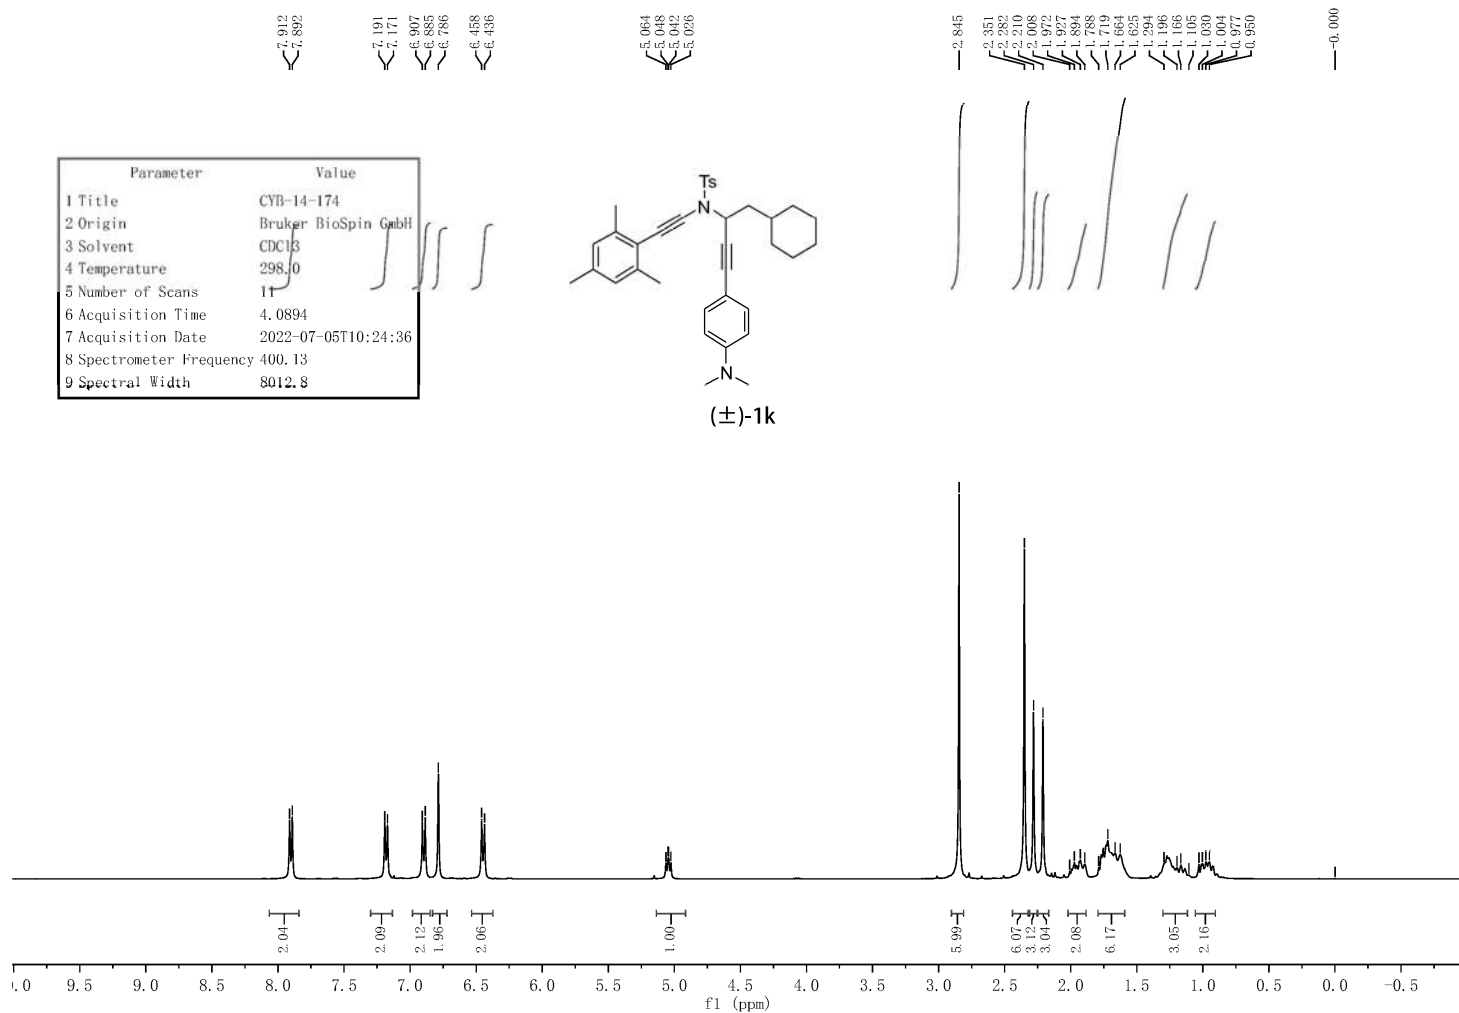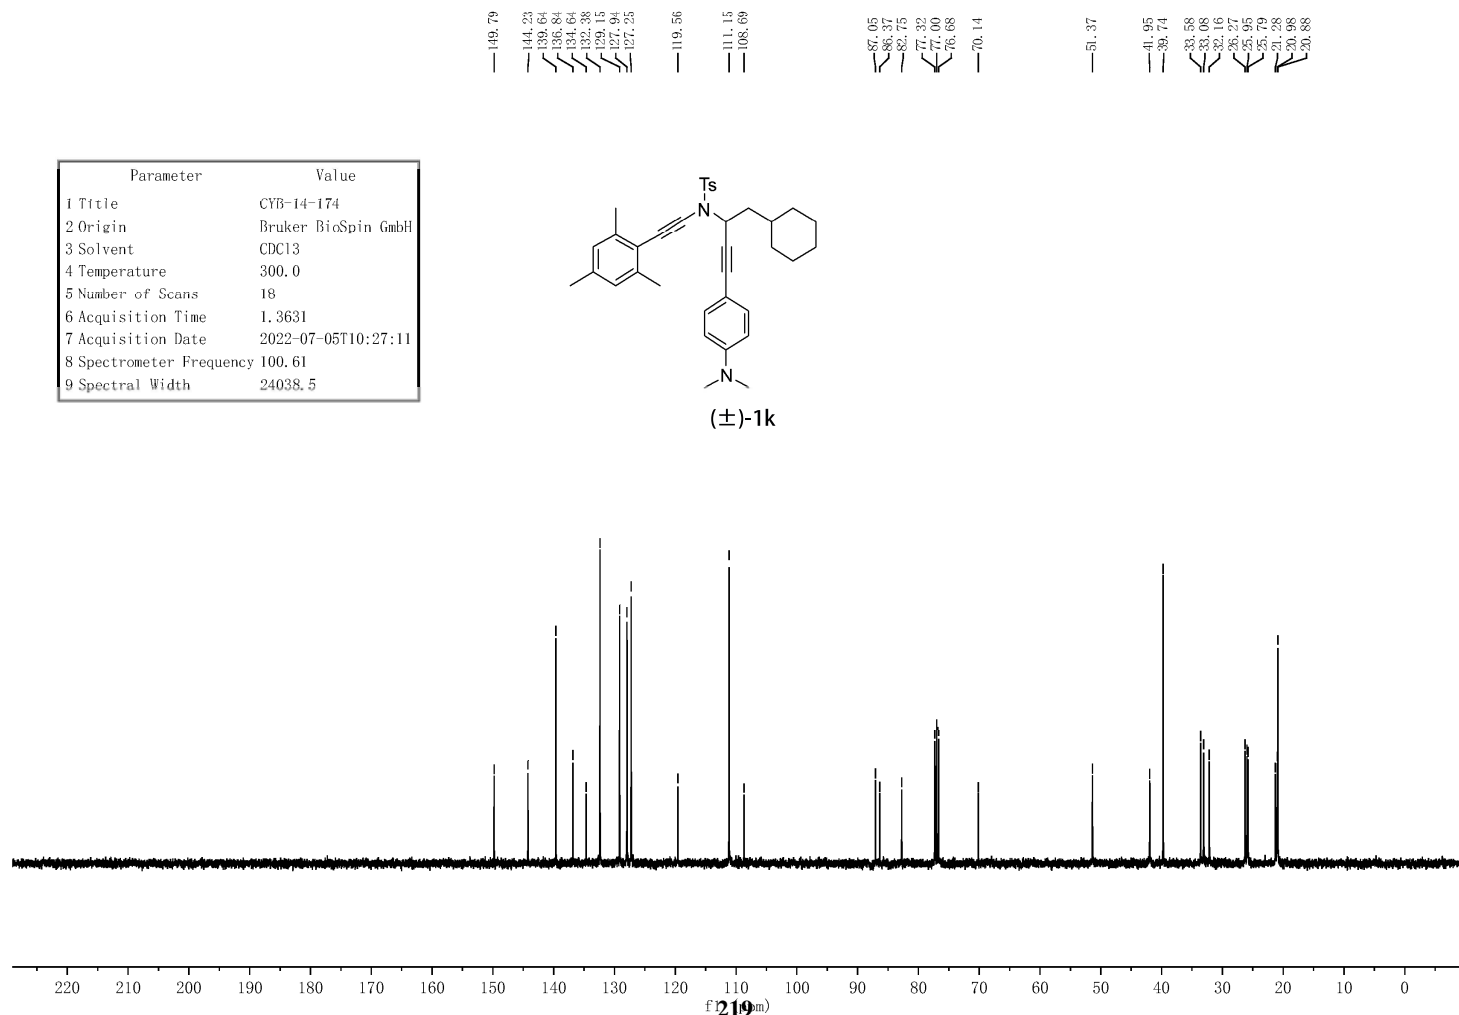

Supplementary Figure 119. <sup>1</sup>H and <sup>13</sup>C NMR spectra for (±)-1k

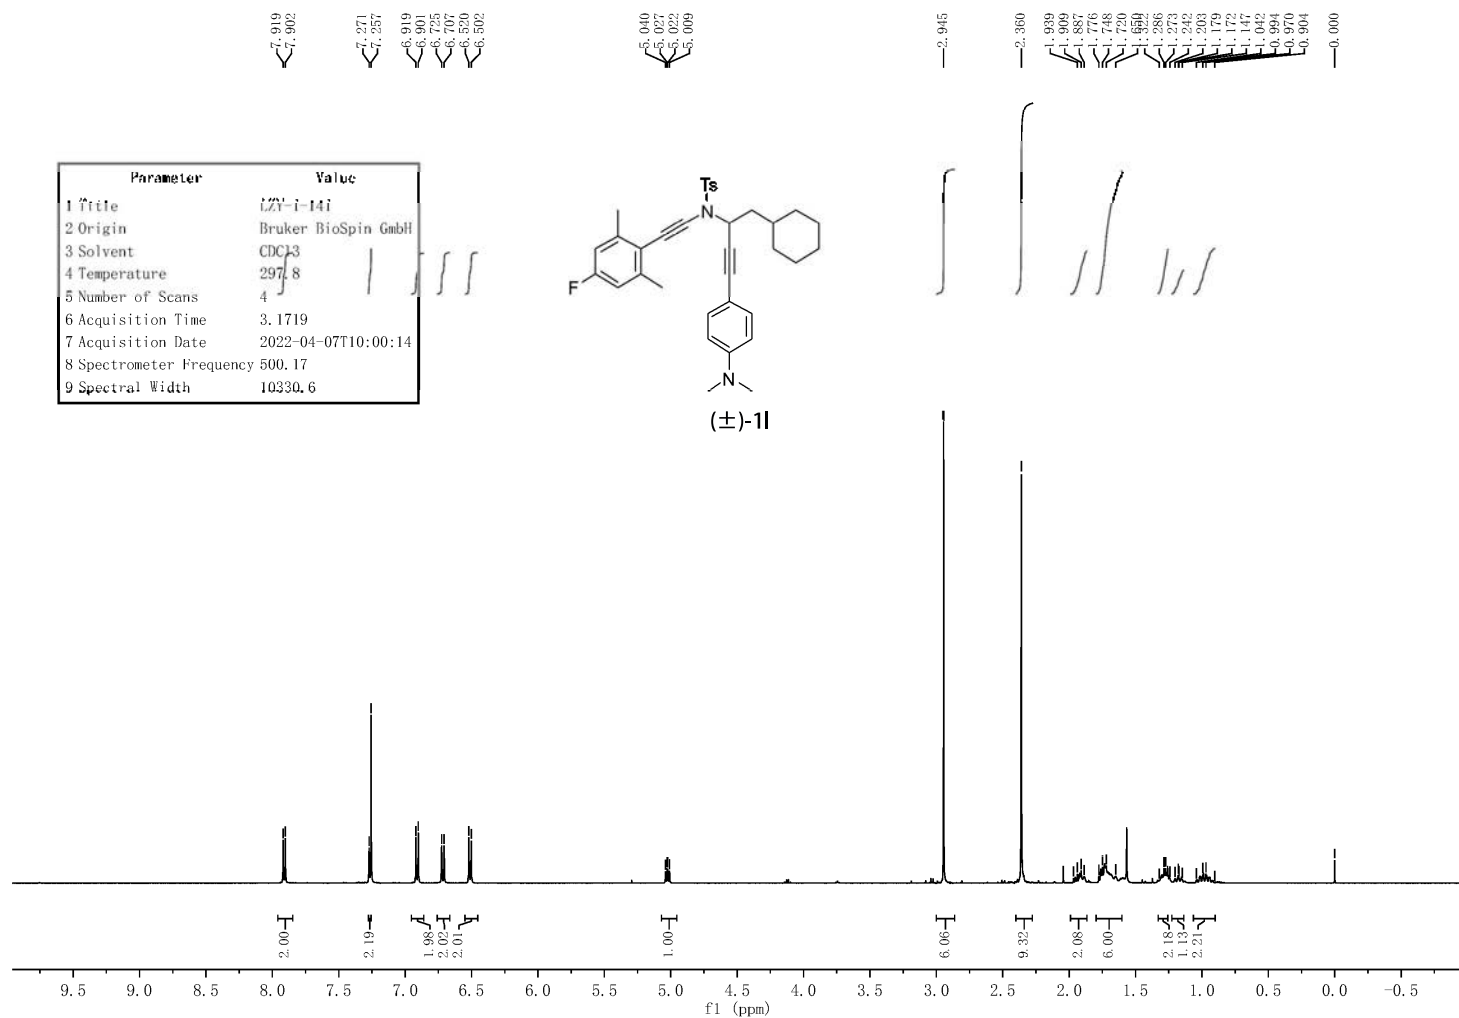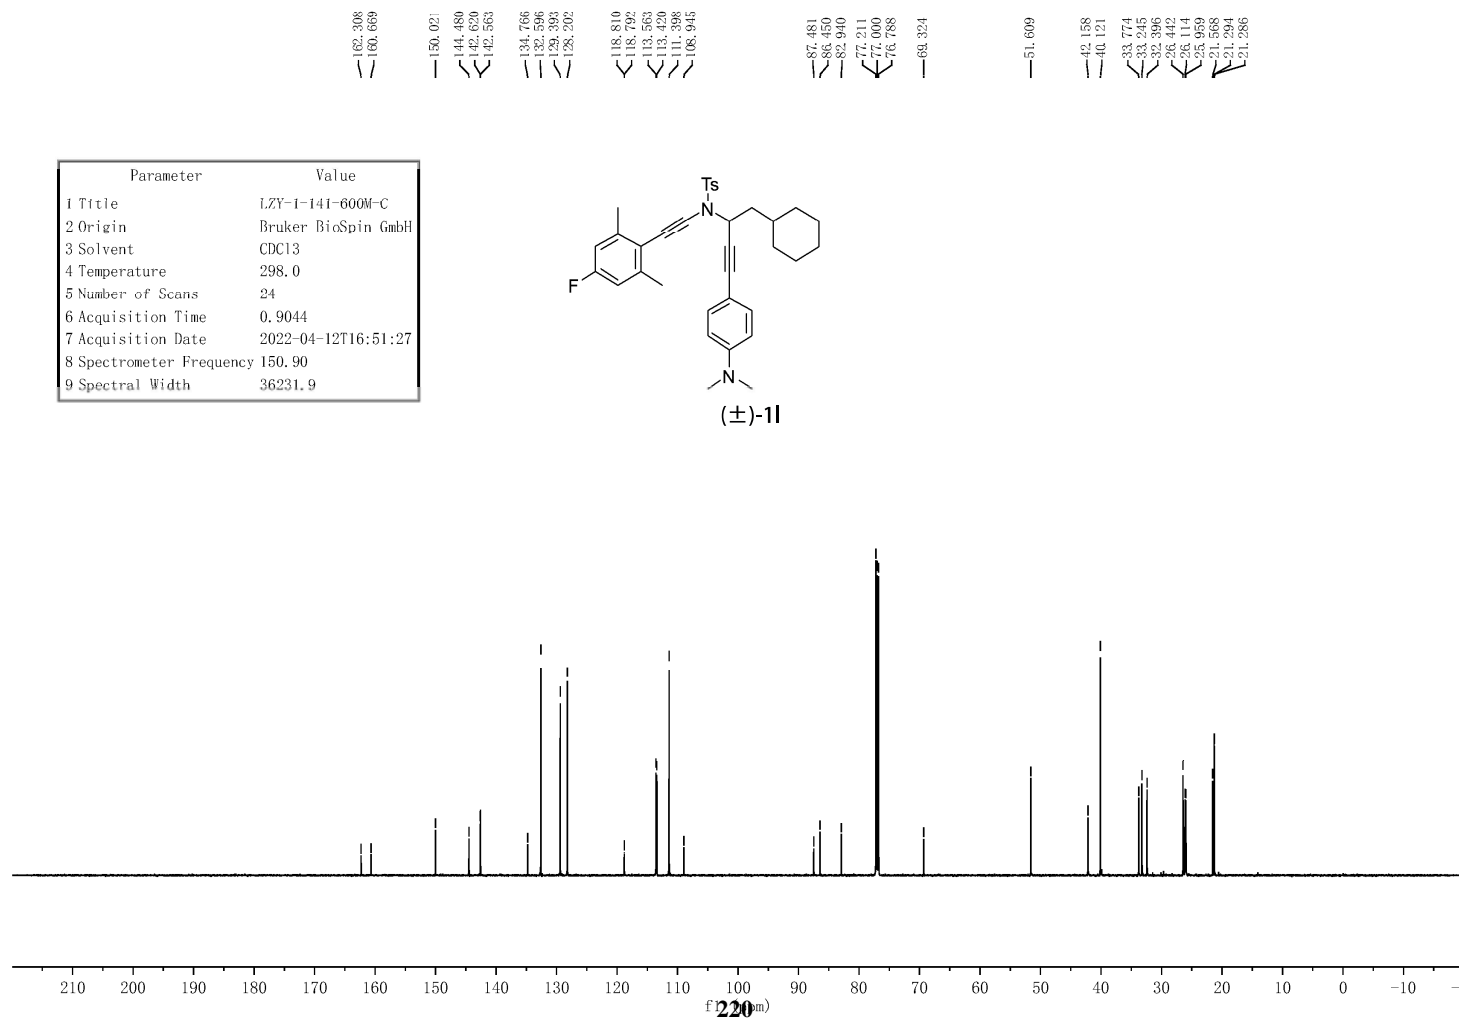

Supplementary Figure 120. <sup>1</sup>H and <sup>13</sup>C NMR spectra for (±)-11

| Parameter                | Value               |
|--------------------------|---------------------|
| 1 Title                  | LZY 1 141           |
| 2 Origin                 |                     |
| 3 Solvent                | CDC13               |
| 4 Temperature            | 297.5               |
| 5 Number of Scans        | 16                  |
| 6 Acquisition Time       | 1.0000              |
| 7 Acquisition Date       | 2022-04-07T01:47:30 |
| 8 Spectrometer Frequency | 376.31              |
| 9 Spectral Width         | 96153.0             |

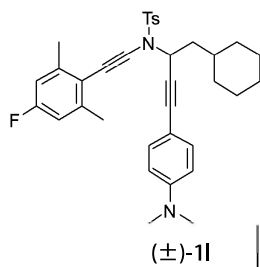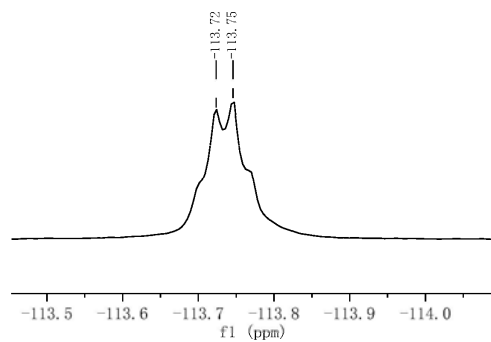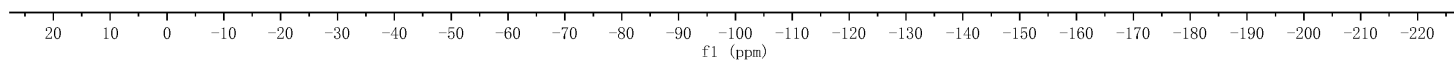

Supplementary Figure 121.  $^{19}\text{F}$  NMR spectra for (±)-11

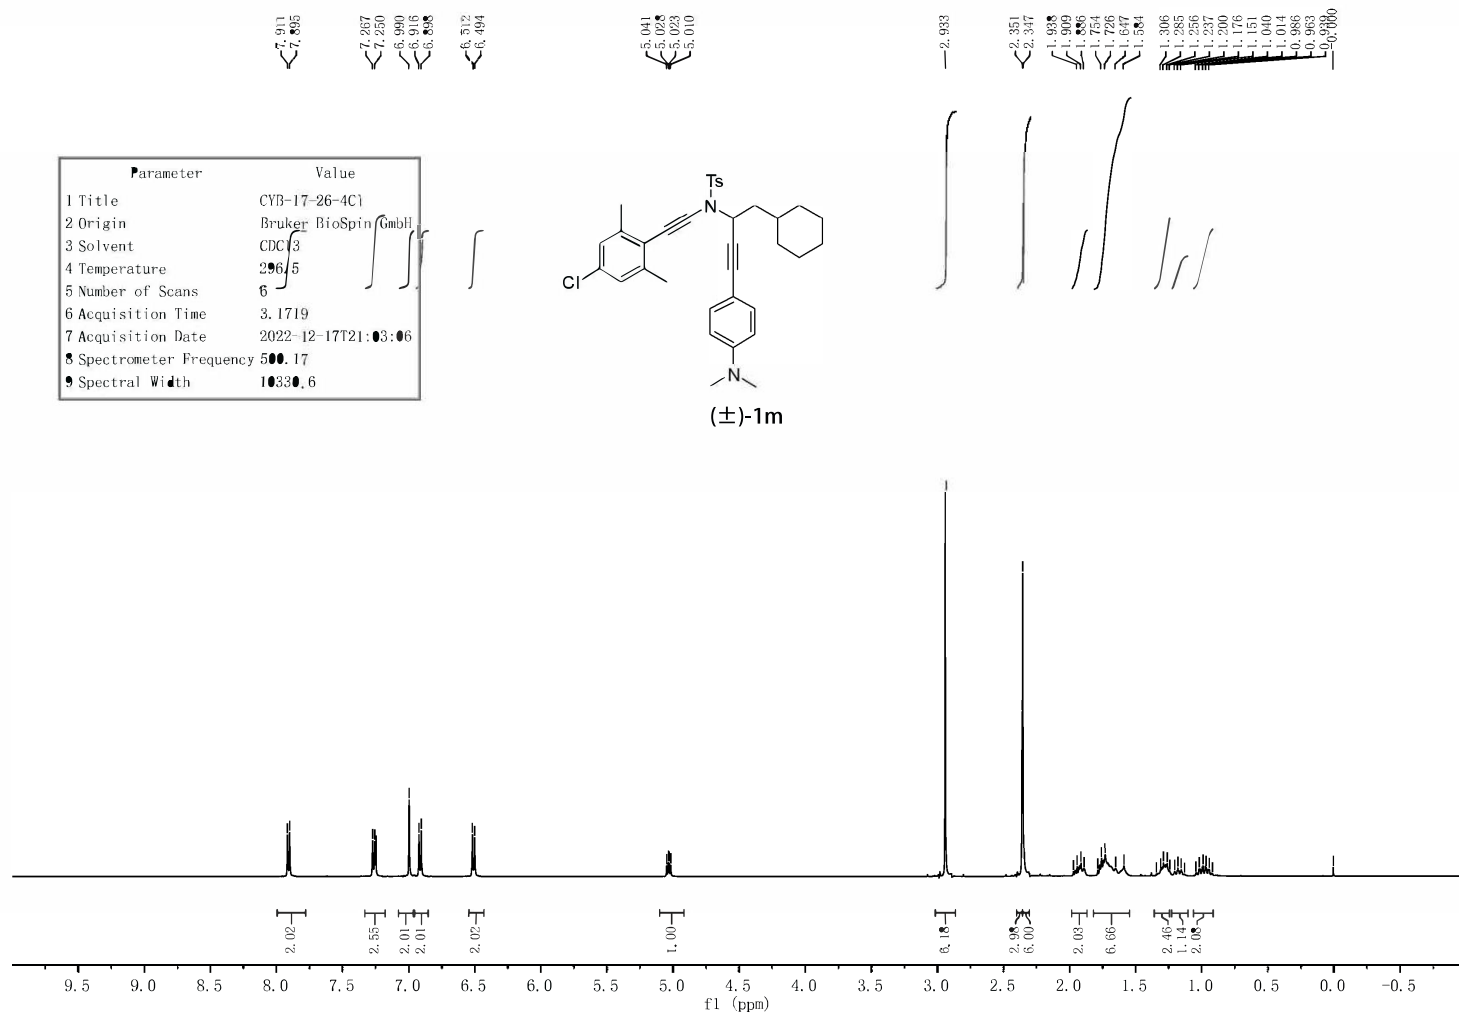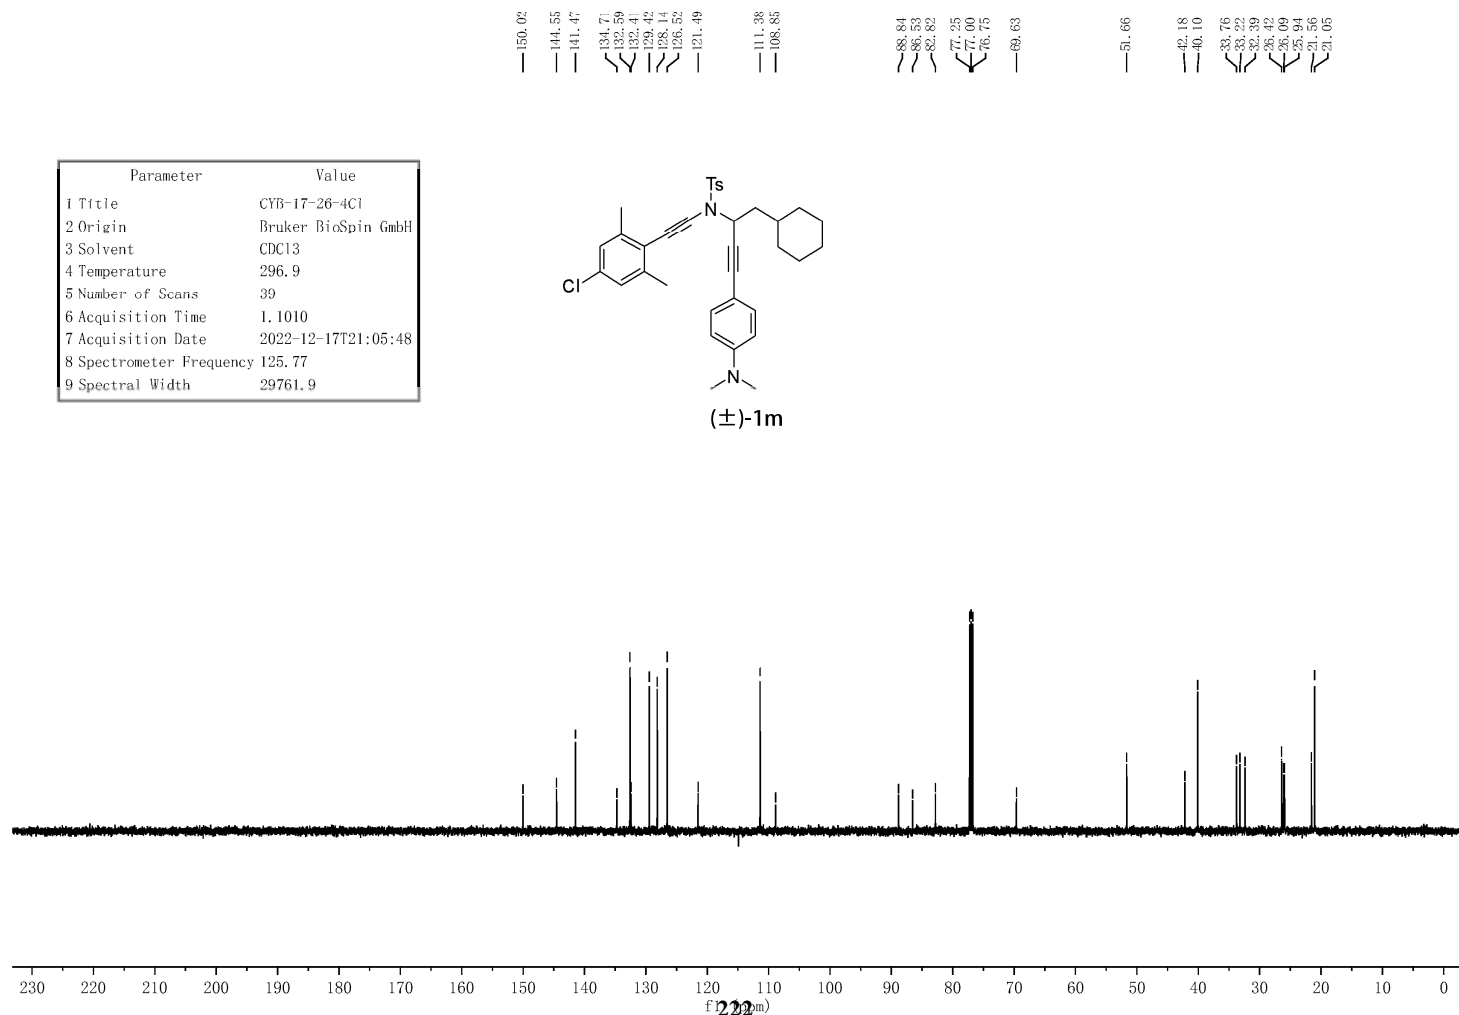

Supplementary Figure 122. <sup>1</sup>H and <sup>13</sup>C NMR spectra for (±)-1m

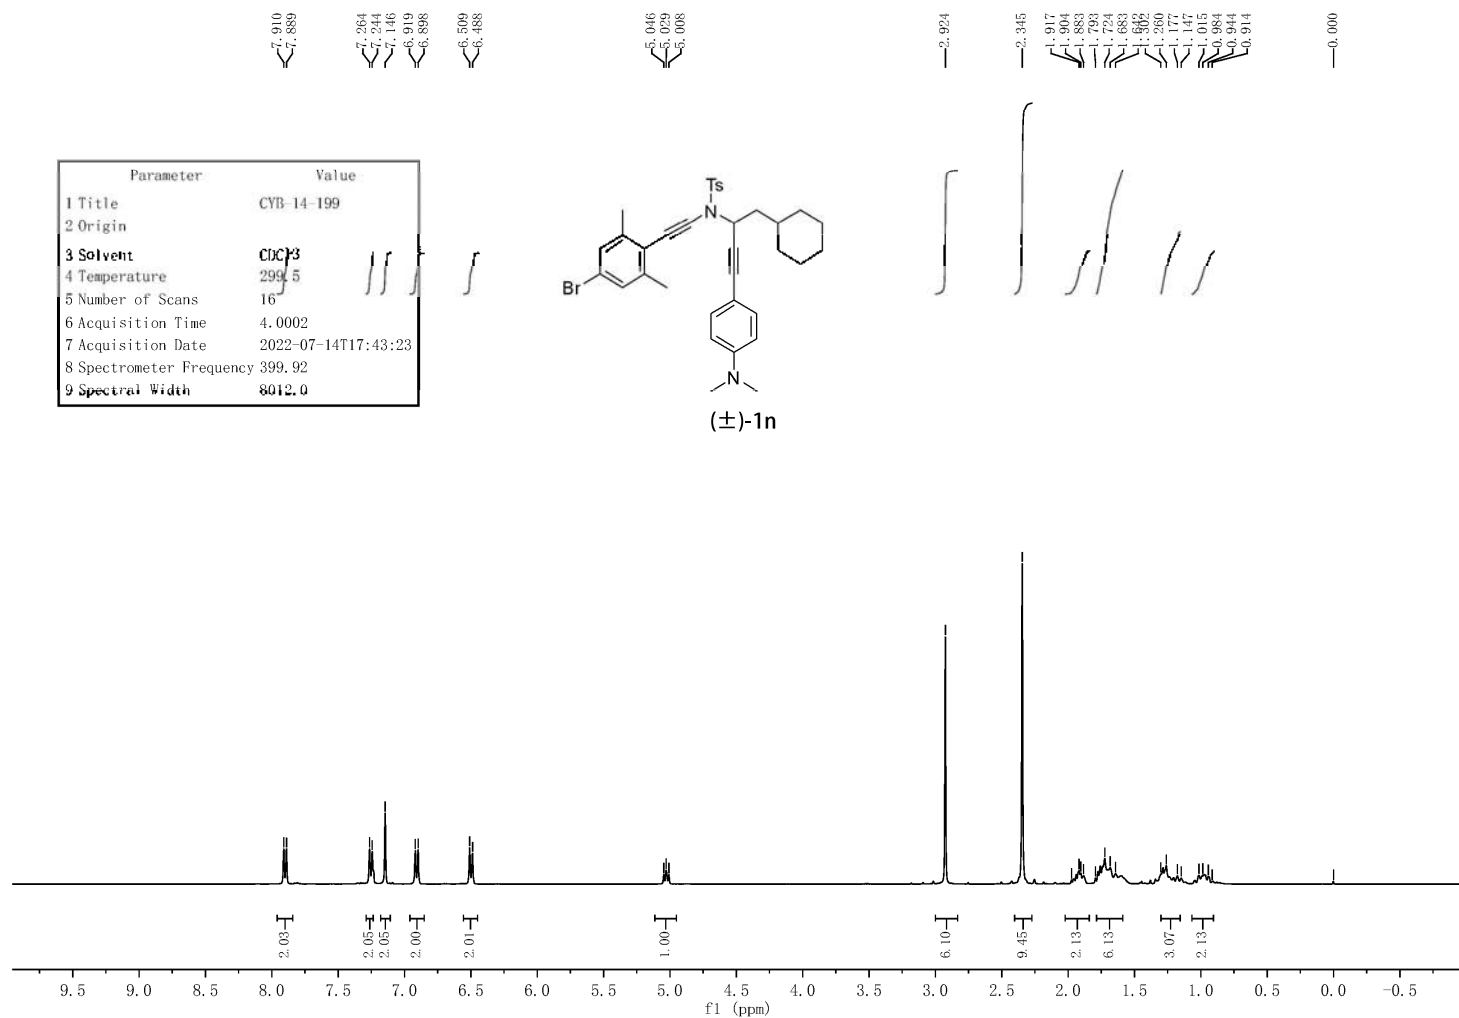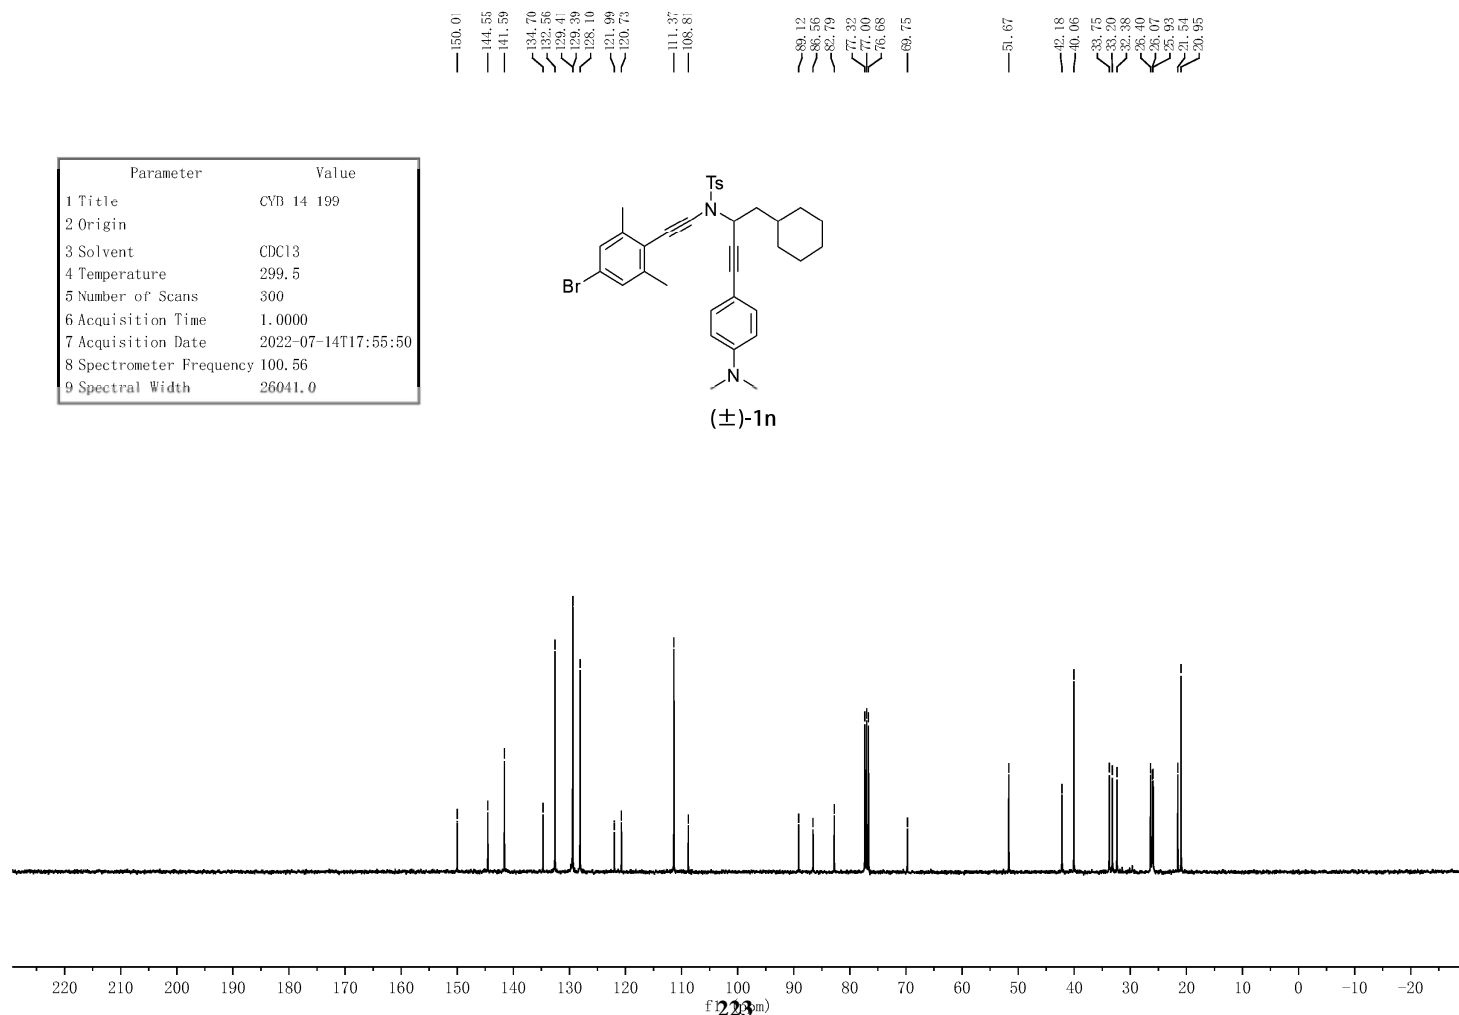

Supplementary Figure 123. <sup>1</sup>H and <sup>13</sup>C NMR spectra for (±)-1n

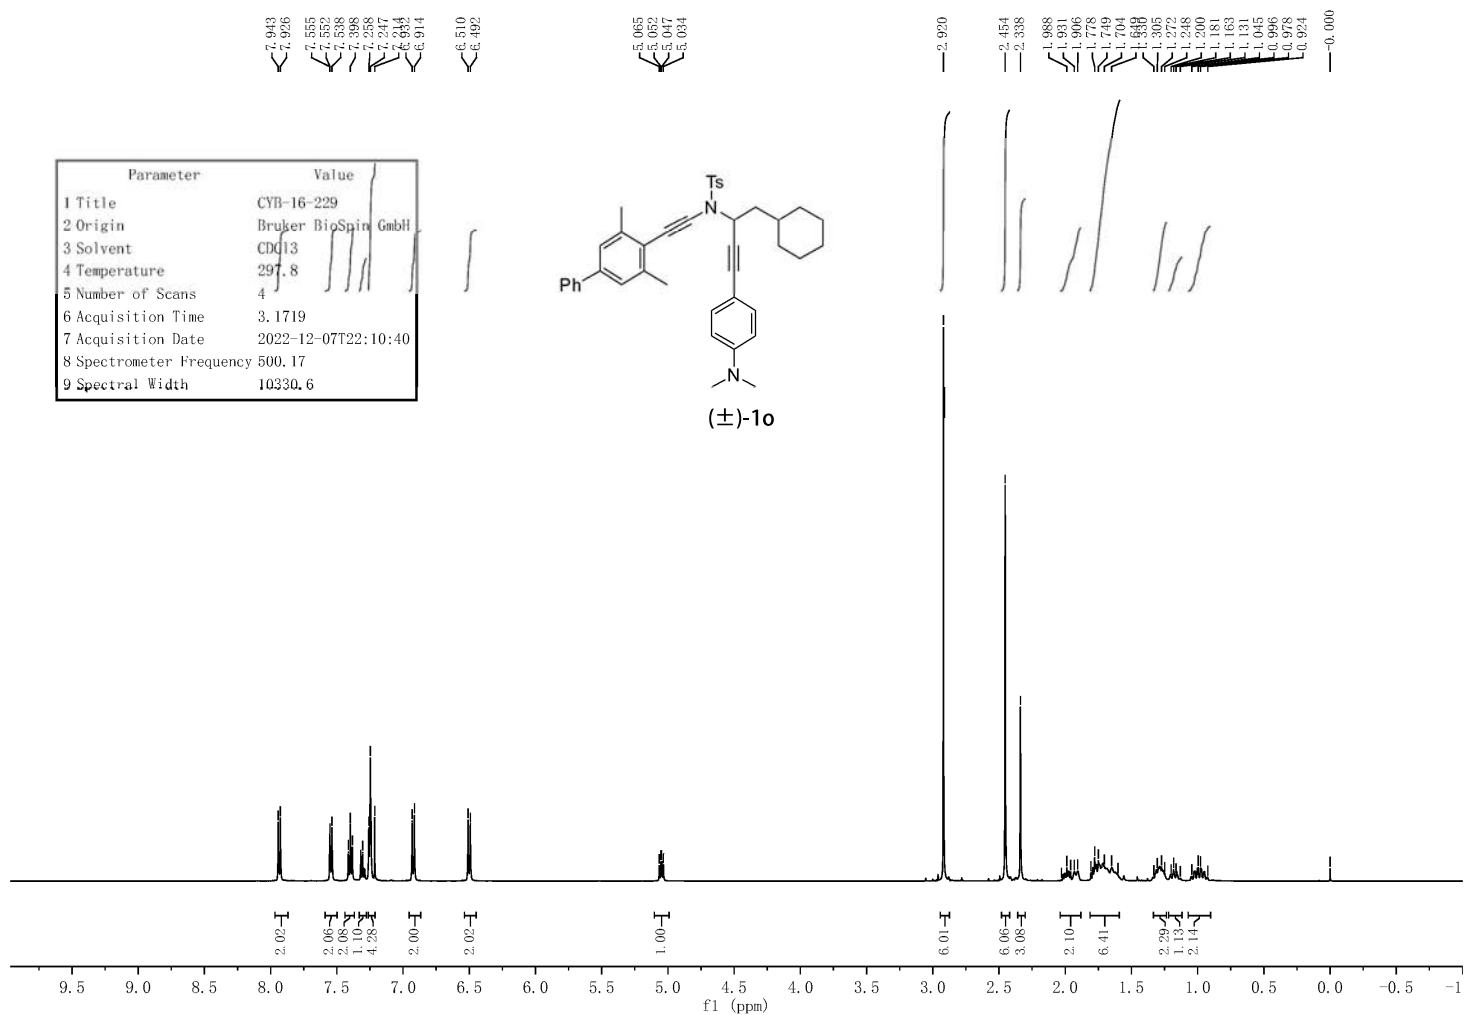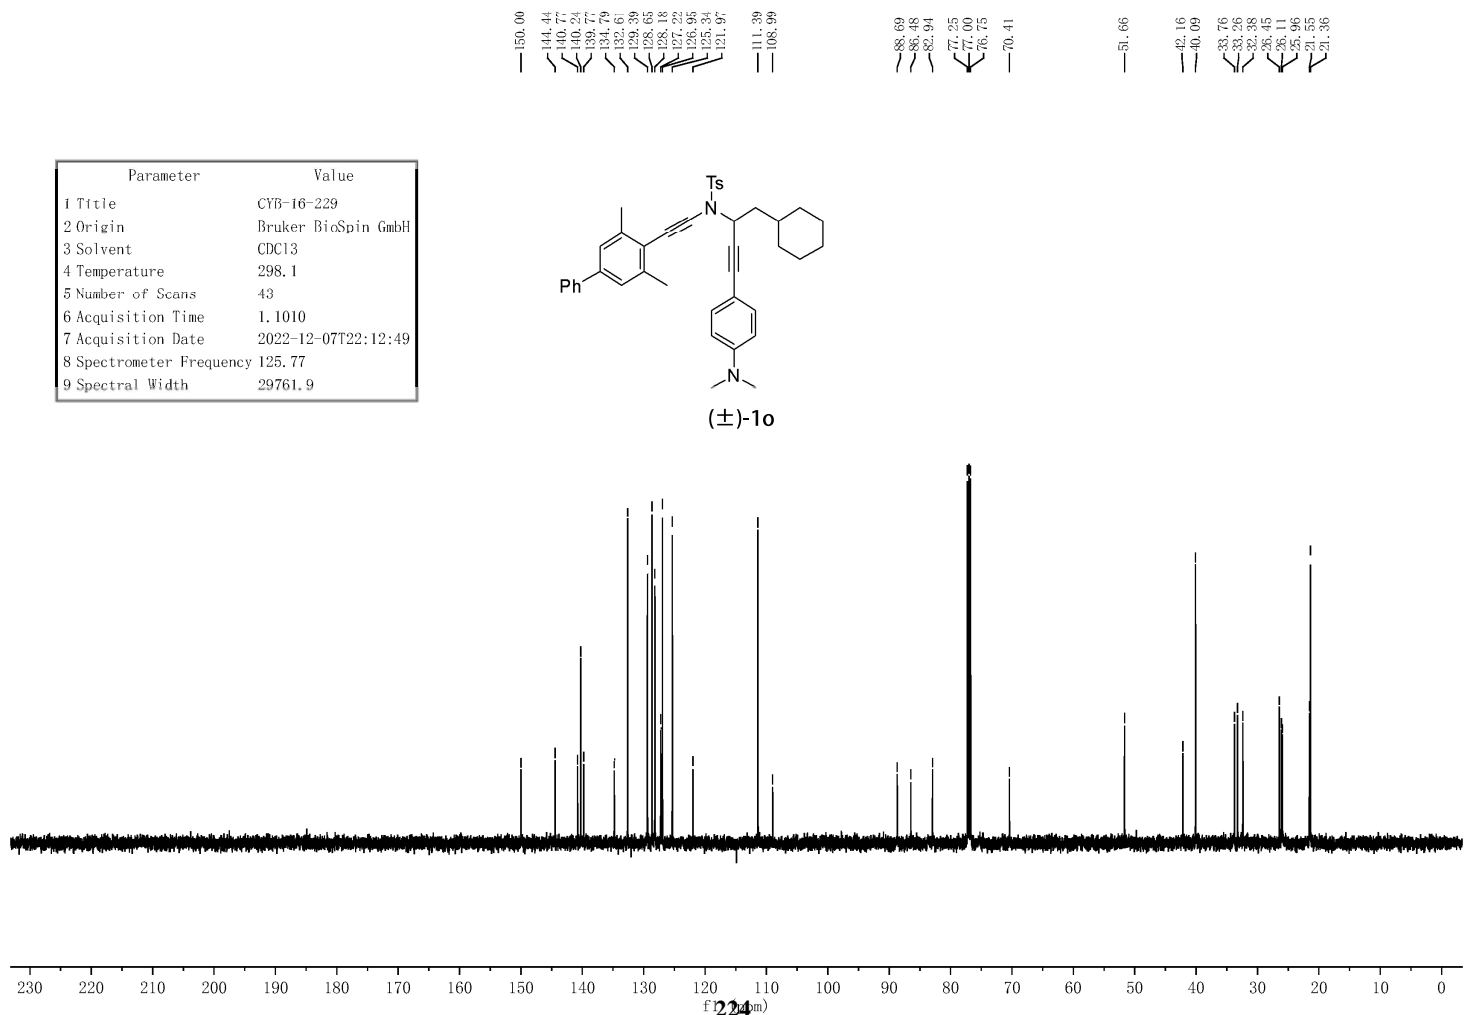

Supplementary Figure 124. <sup>1</sup>H and <sup>13</sup>C NMR spectra for (±)-10



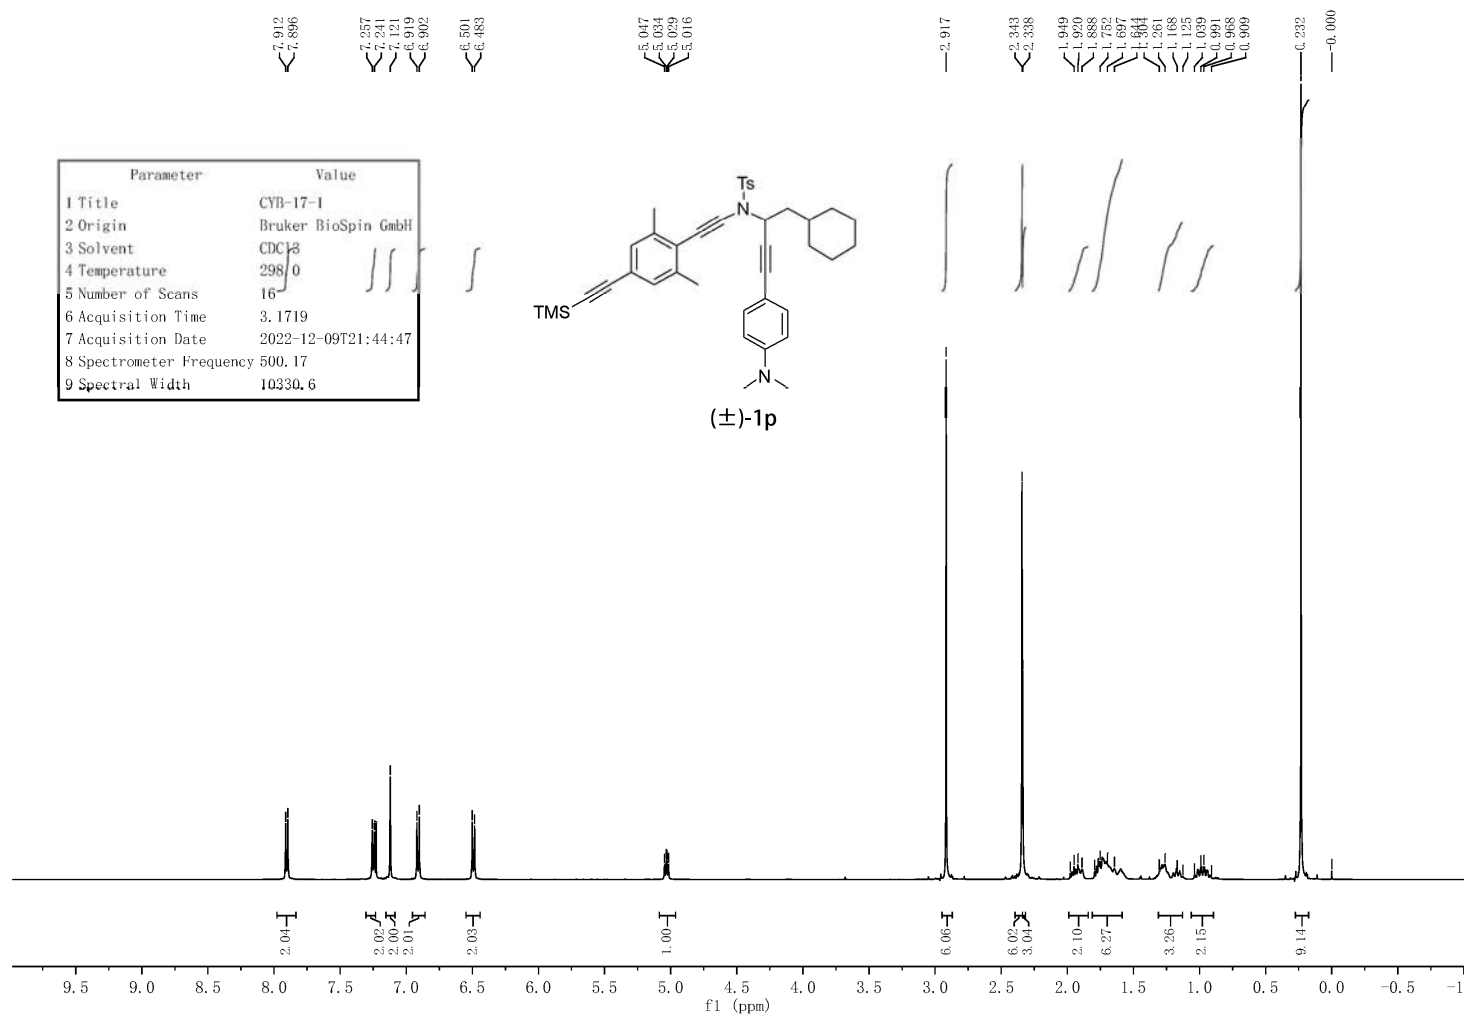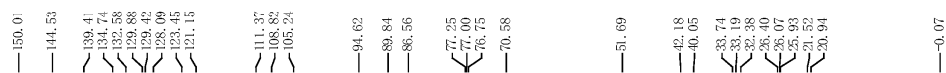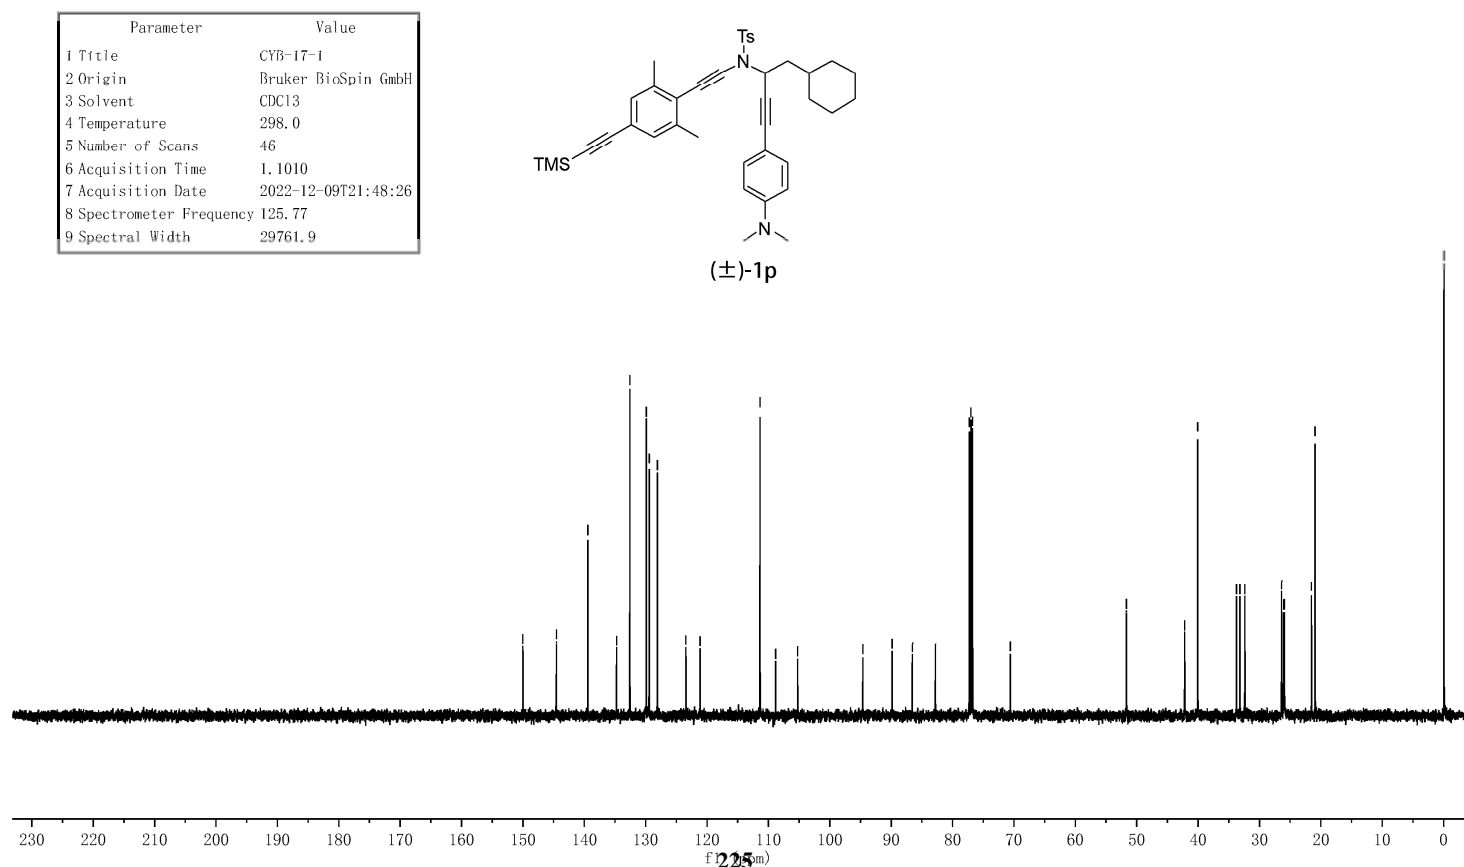

Supplementary Figure 125. <sup>1</sup>H and <sup>13</sup>C NMR spectra for (±)-1p

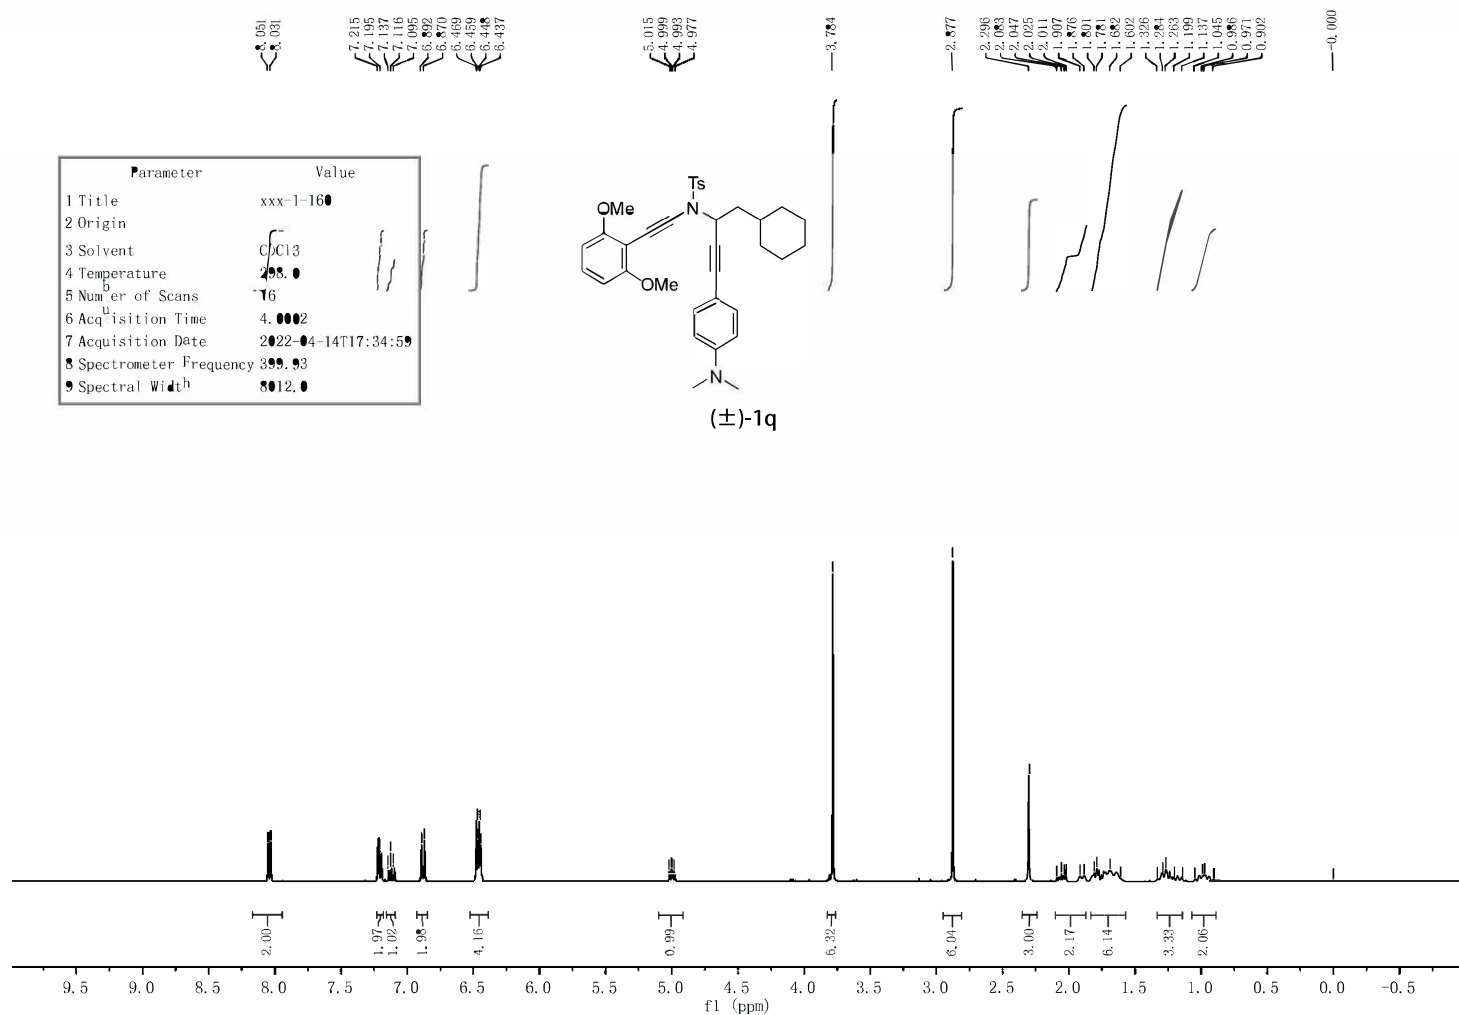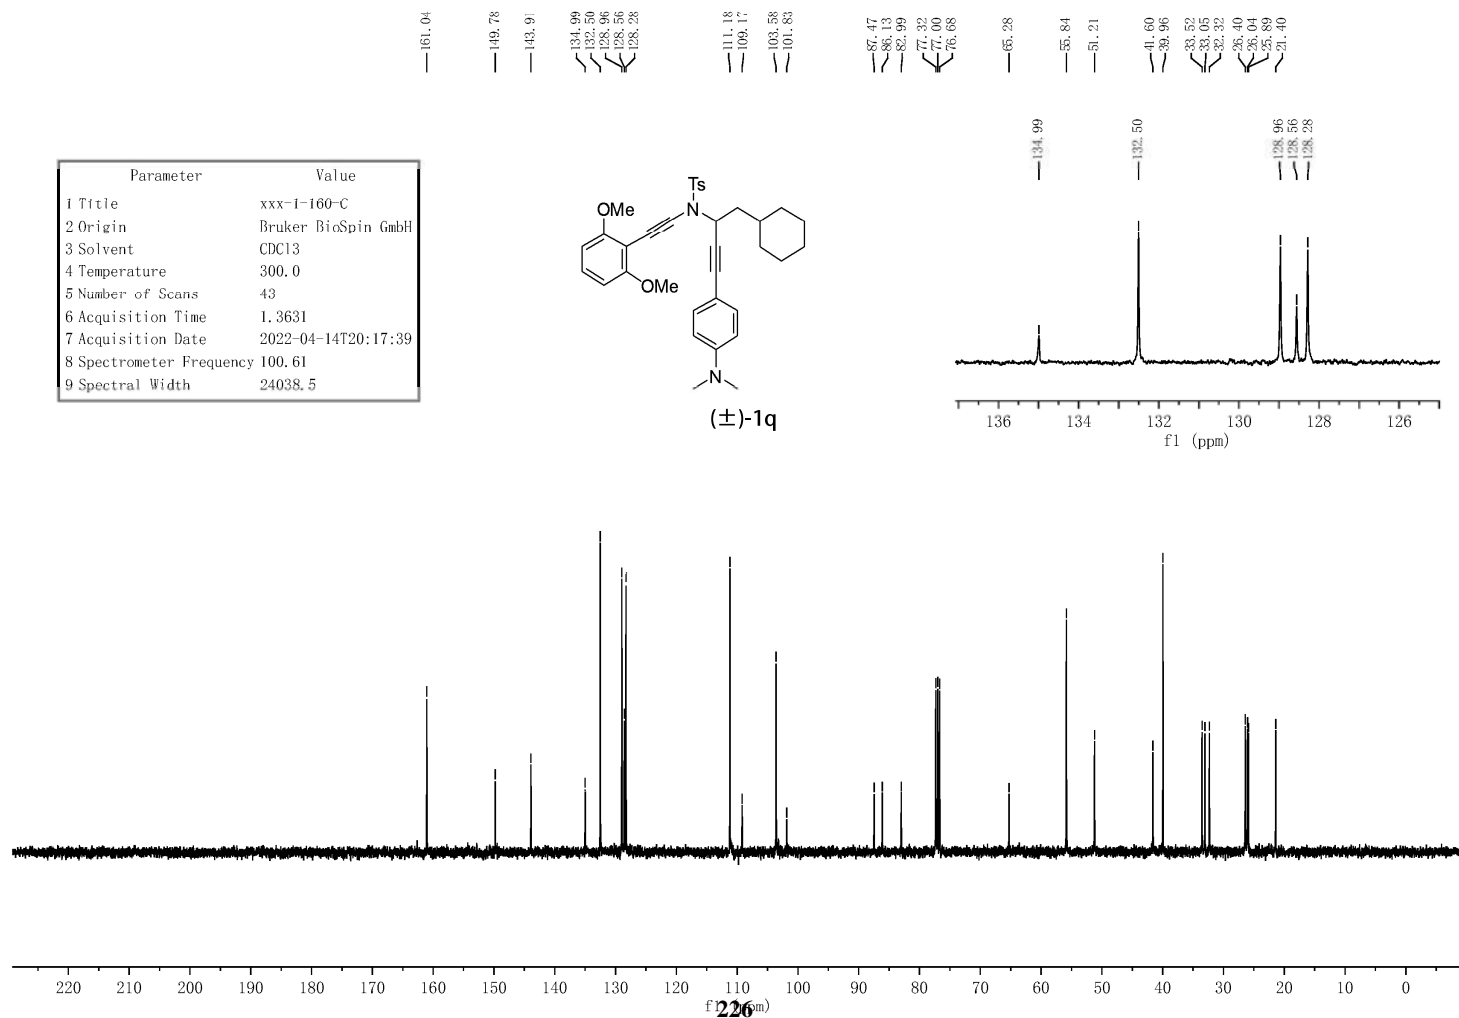

Supplementary Figure 126. <sup>1</sup>H and <sup>13</sup>C NMR spectra for (±)-1q

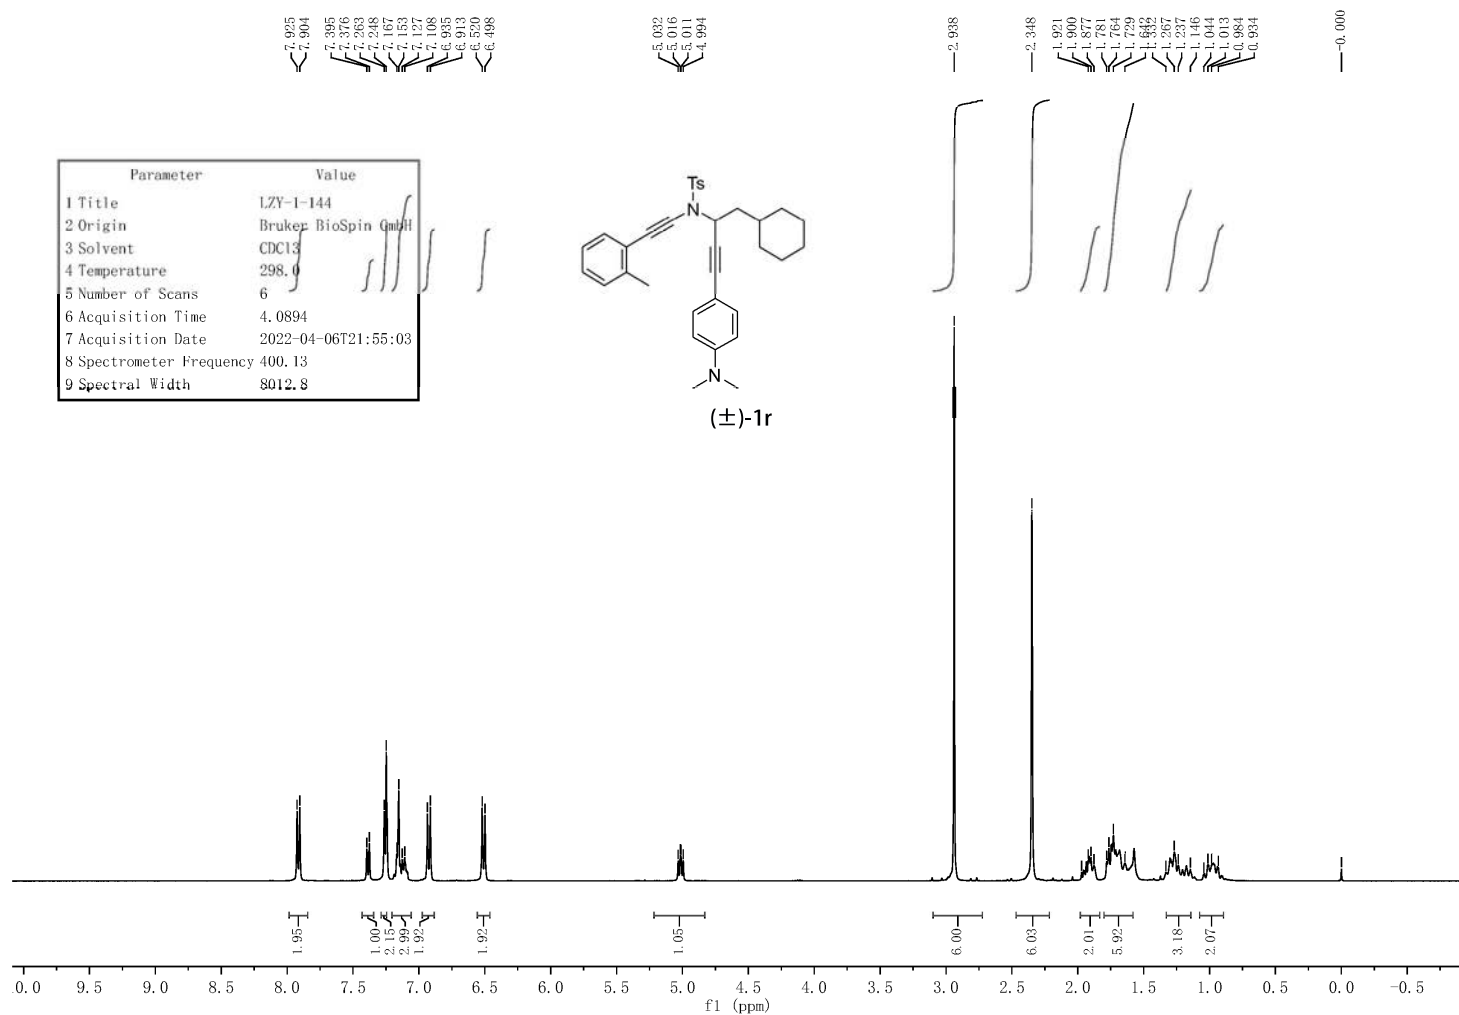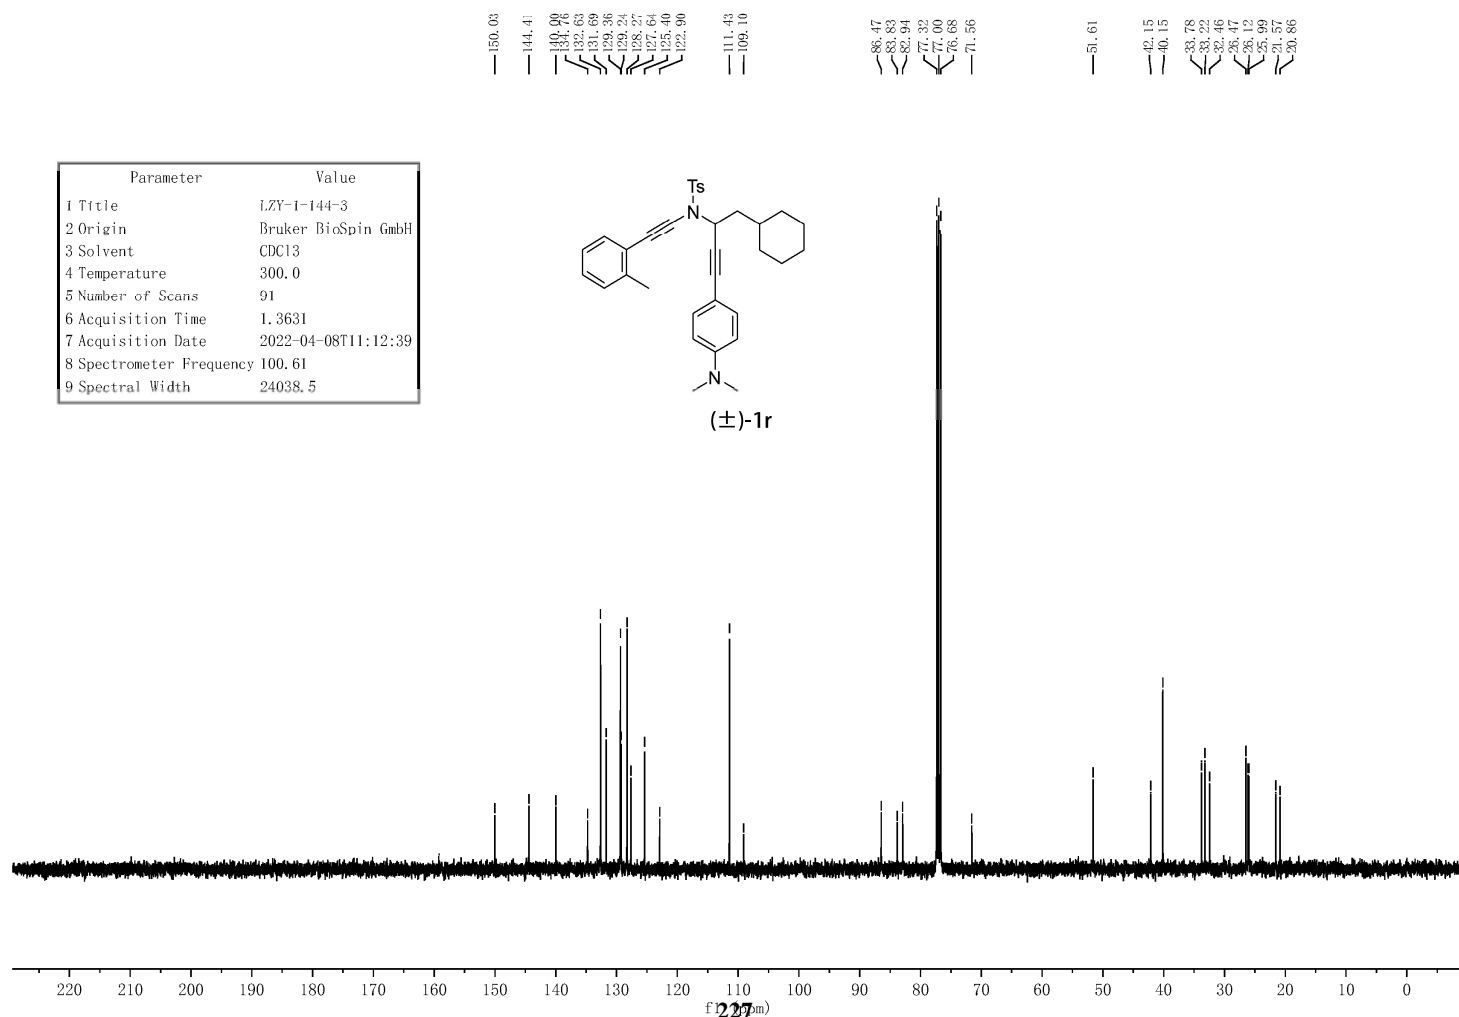

Supplementary Figure 127. <sup>1</sup>H and <sup>13</sup>C NMR spectra for (±)-1r

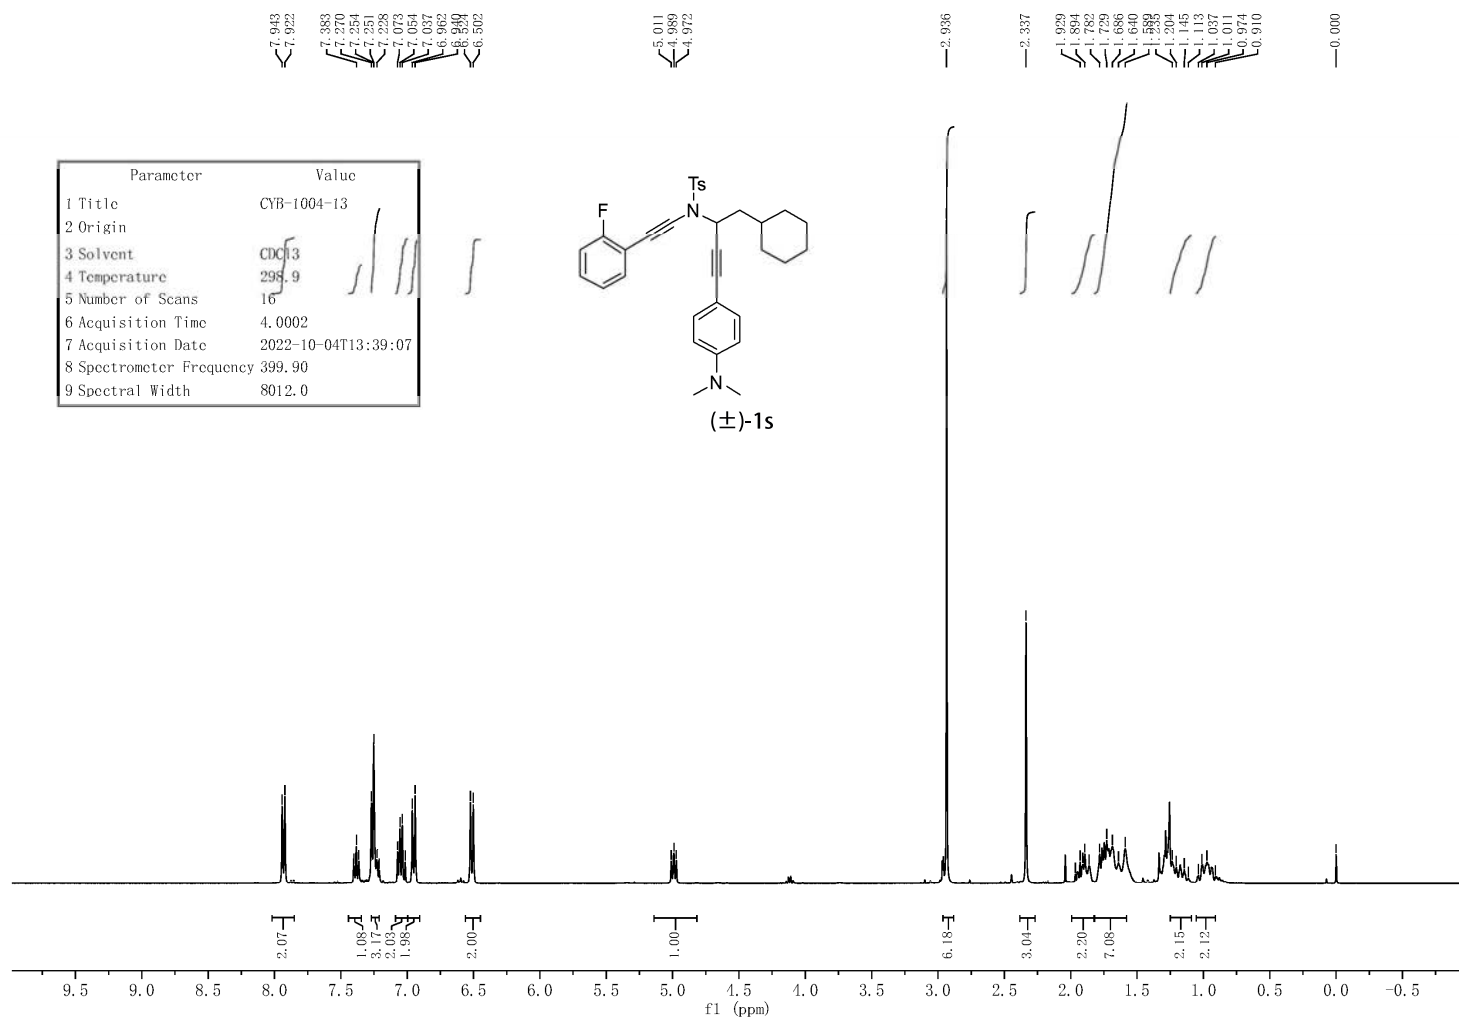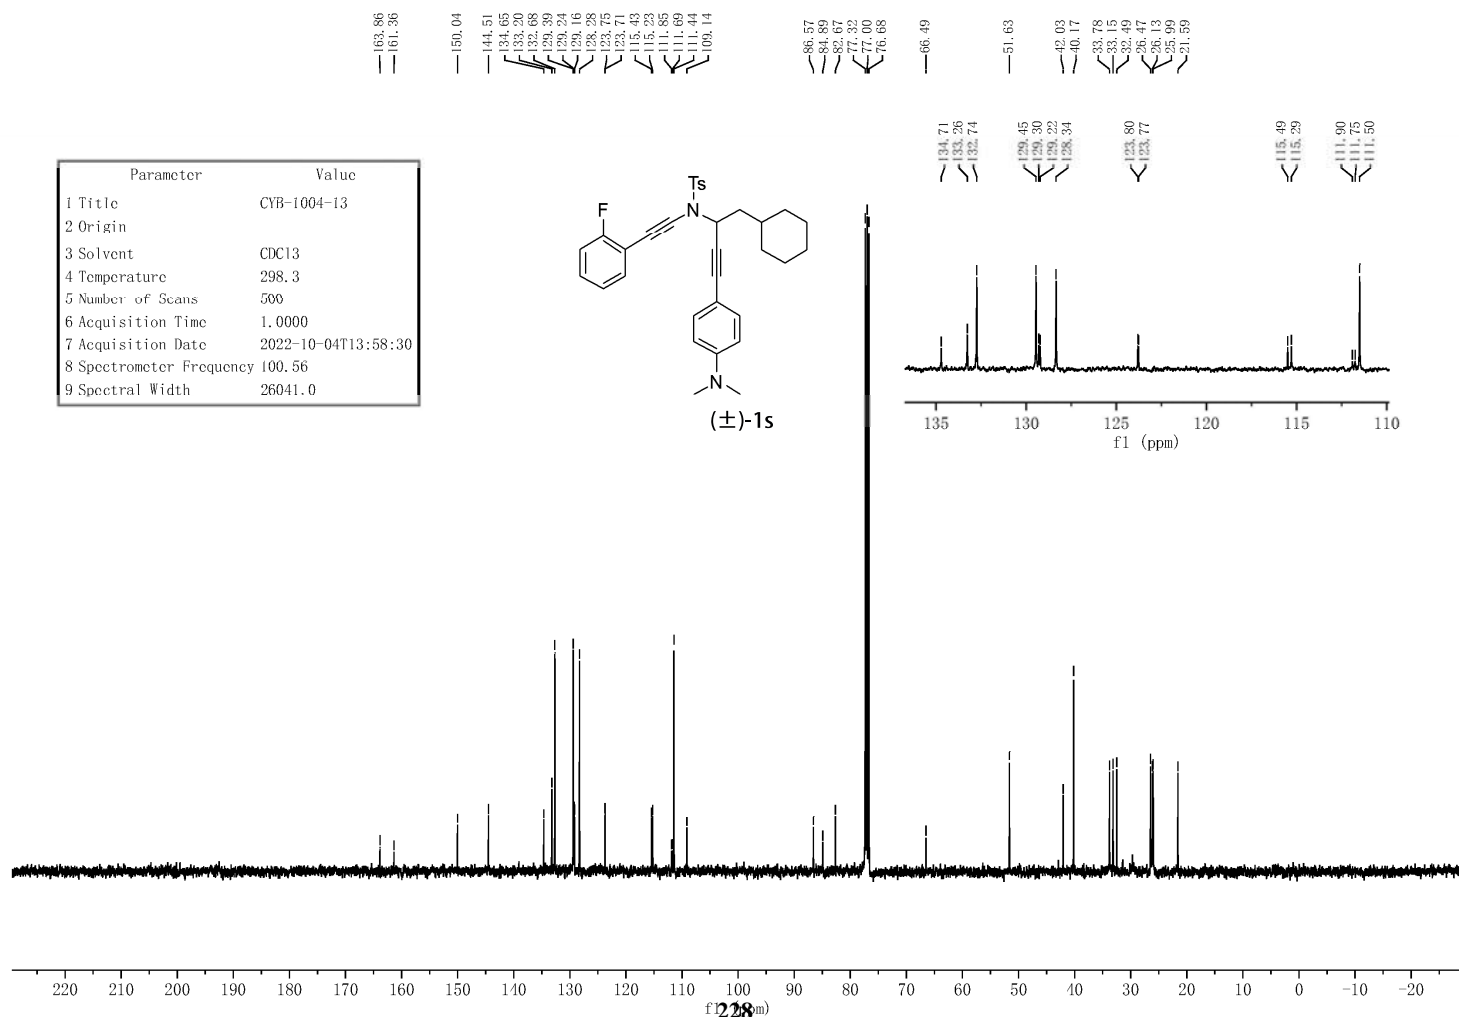

Supplementary Figure 128. <sup>1</sup>H and <sup>13</sup>C NMR spectra for (±)-1s

109.67  
109.69  
109.71  
109.72

| Parameter                | Value               |
|--------------------------|---------------------|
| 1 Title                  | CYB-1004-13         |
| 2 Origin                 |                     |
| 3 Solvent                | CDCl3               |
| 4 Temperature            | 298.3               |
| 5 Number of Scans        | 60                  |
| 6 Acquisition Time       | 1.0000              |
| 7 Acquisition Date       | 2022-10-04T14:03:18 |
| 8 Spectrometer Frequency | 376.28              |
| 9 Spectral Width         | 96153.0             |

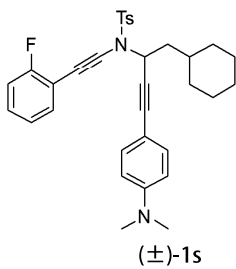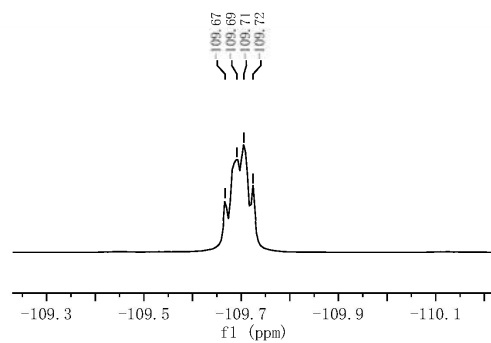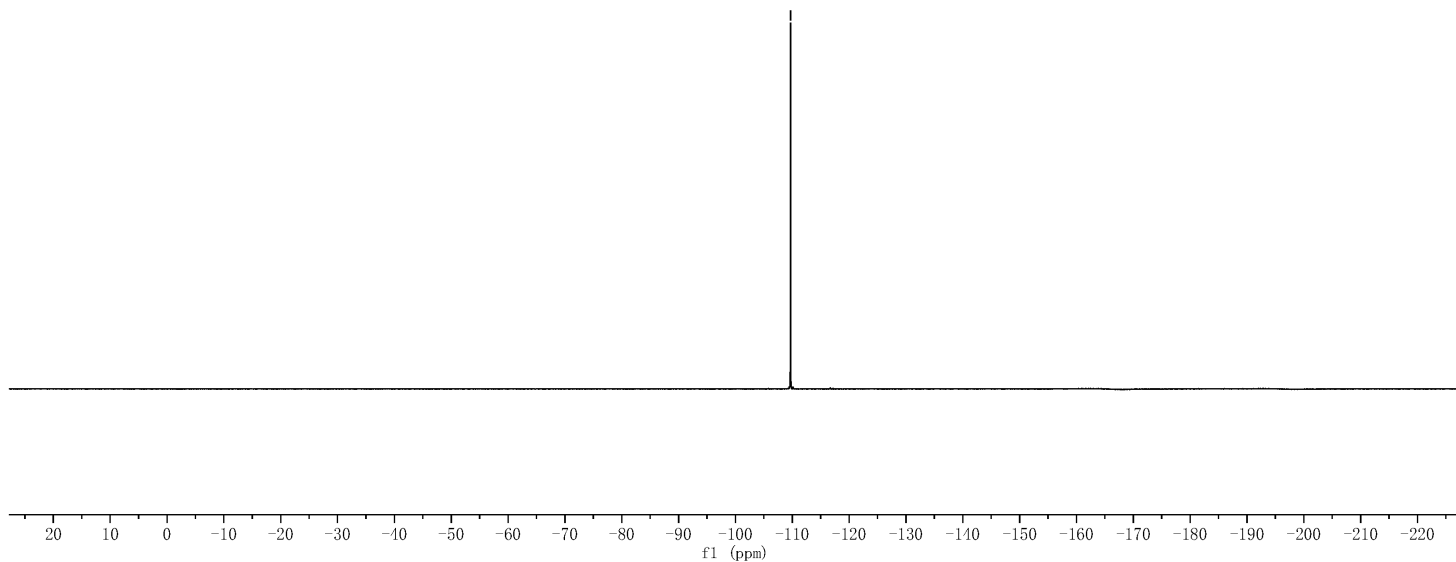

Supplementary Figure 129.  $^{19}\text{F}$  NMR spectra for (±)-1s

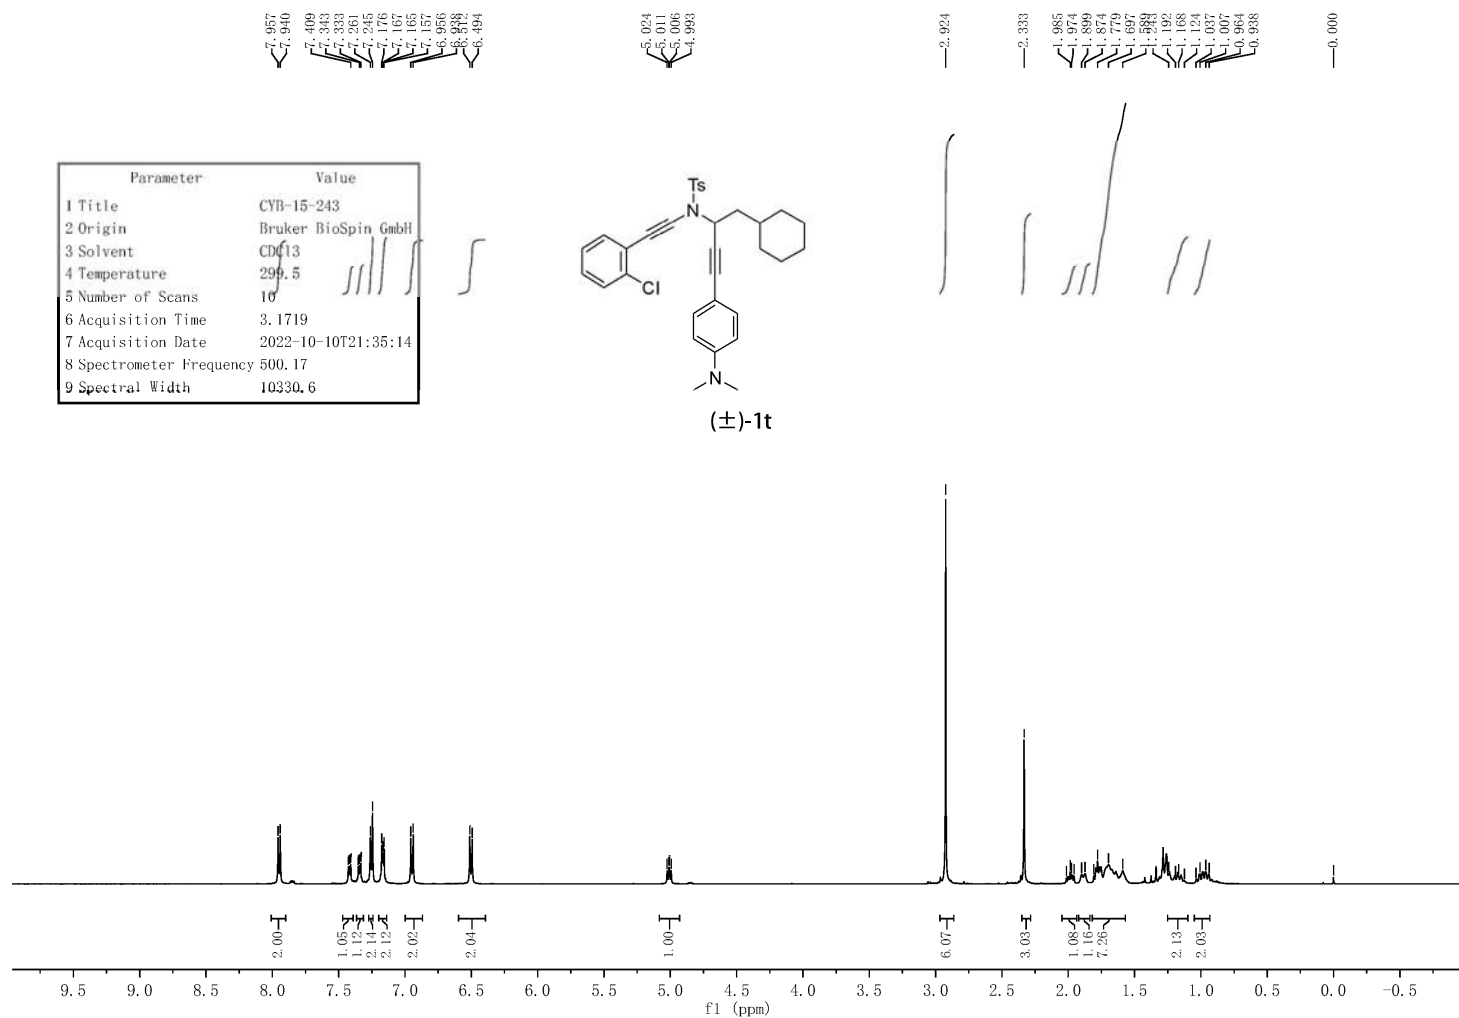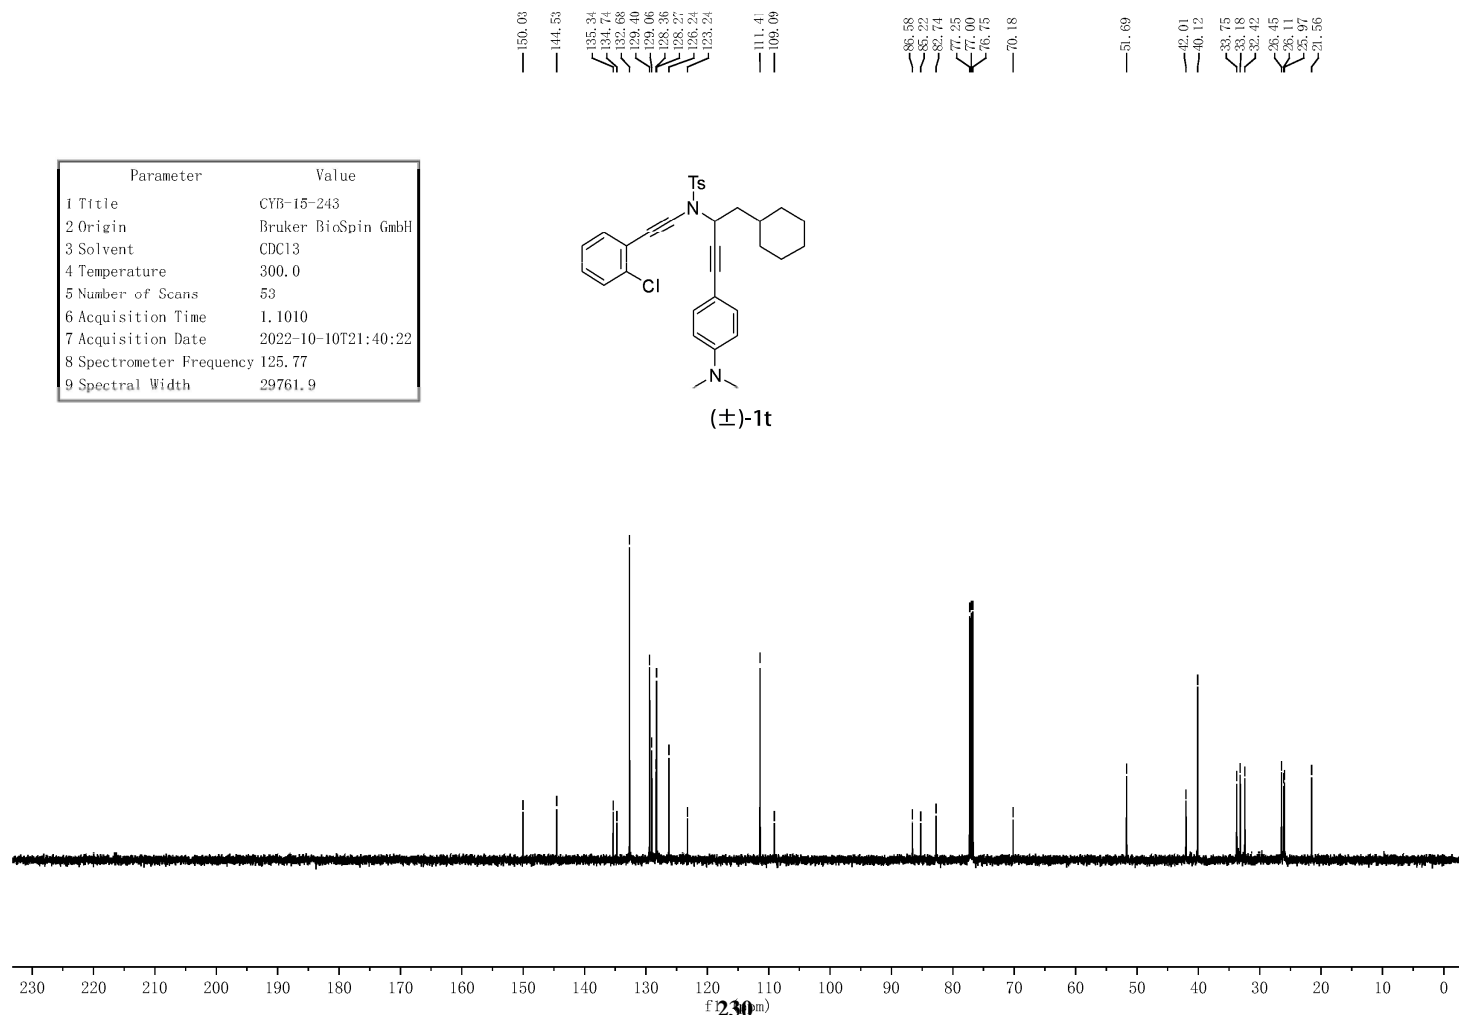

Supplementary Figure 130. <sup>1</sup>H and <sup>13</sup>C NMR spectra for (±)-1t

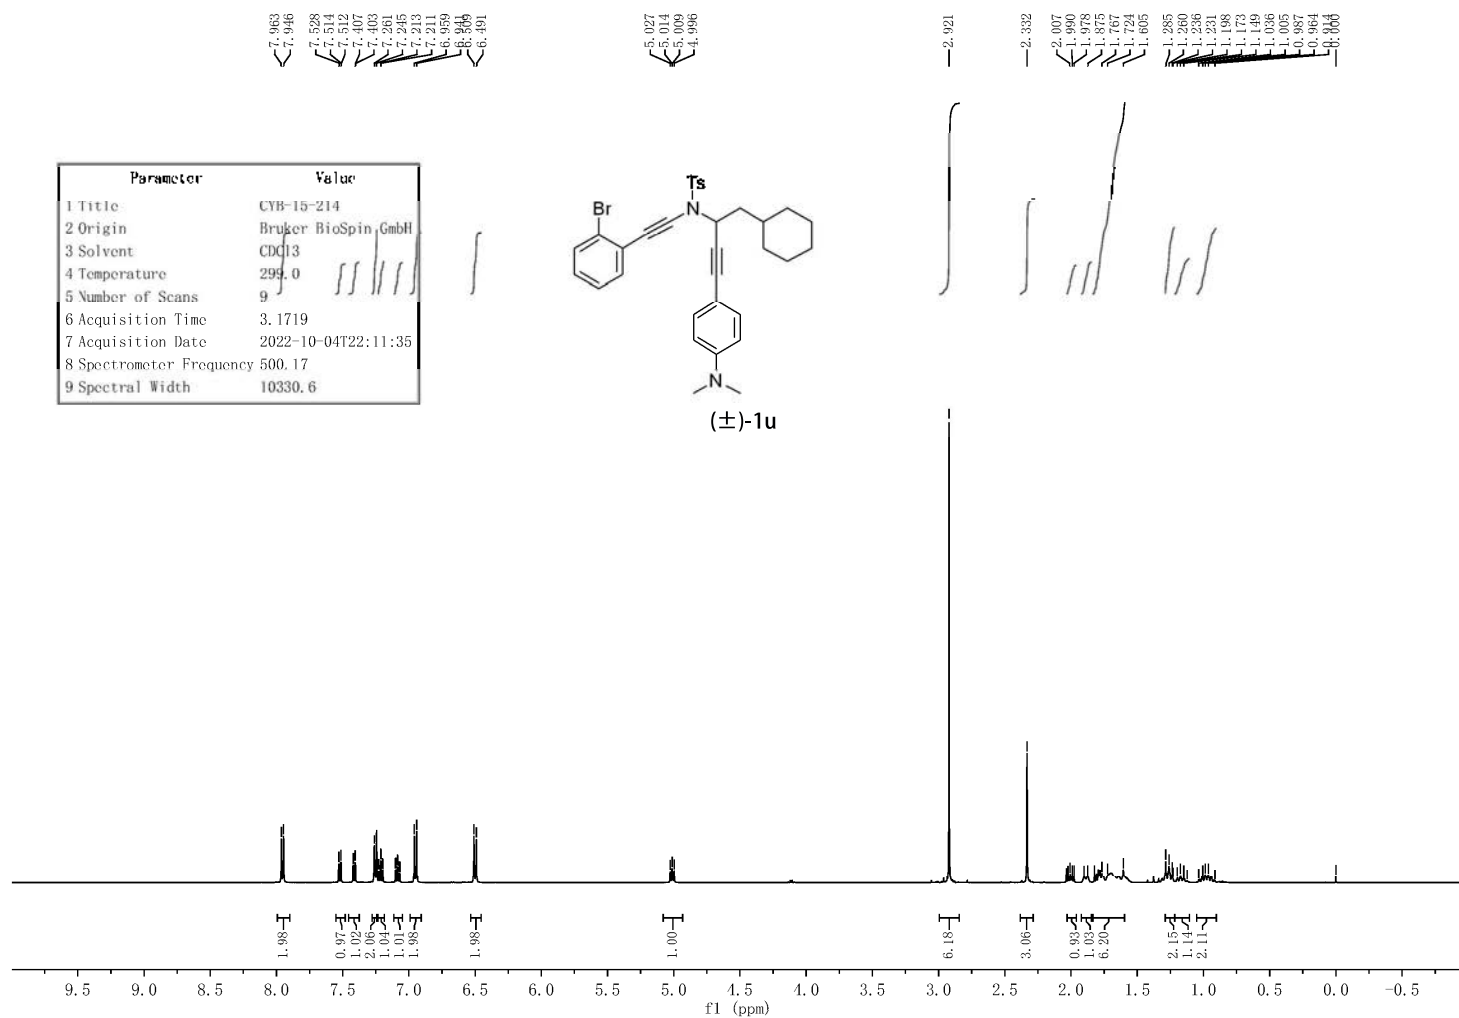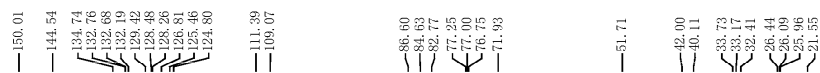

| Parameter                | Value               |
|--------------------------|---------------------|
| 1 Title                  | CYB-15-214          |
| 2 Origin                 | Brüker BioSpin GmbH |
| 3 Solvent                | CDCl <sub>3</sub>   |
| 4 Temperature            | 299.1               |
| 5 Number of Scans        | 48                  |
| 6 Acquisition Time       | 1.1010              |
| 7 Acquisition Date       | 2022-10-04T22:13:37 |
| 8 Spectrometer Frequency | 125.77              |
| 9 Spectral Width         | 29761.9             |

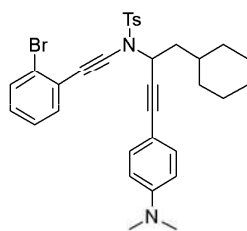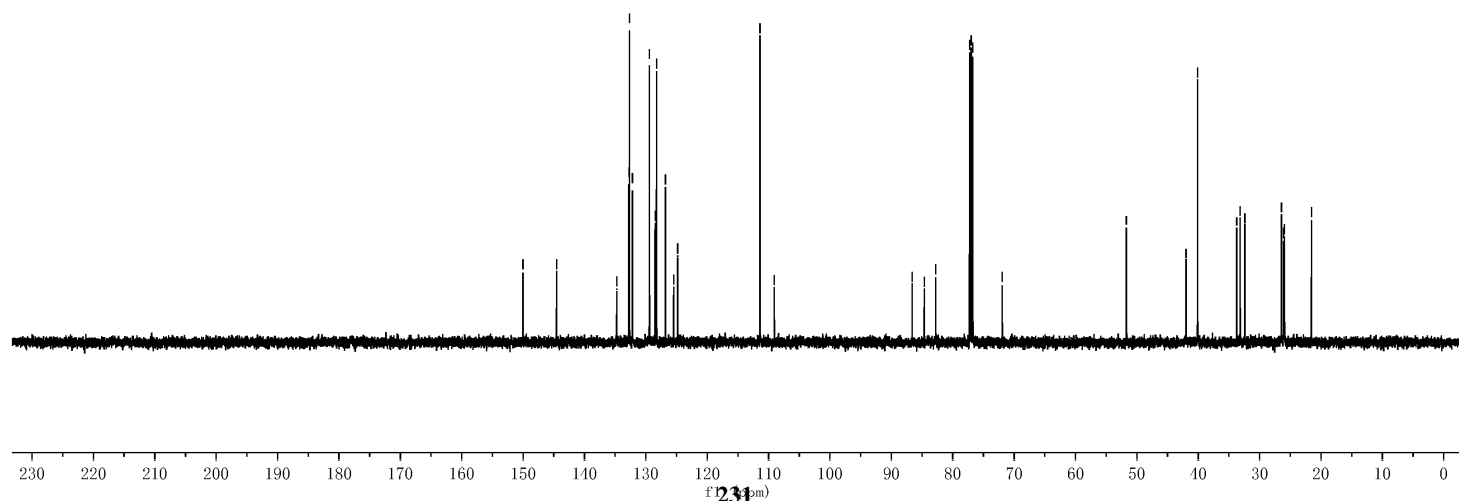

Supplementary Figure 131. <sup>1</sup>H and <sup>13</sup>C NMR spectra for (±)-1u

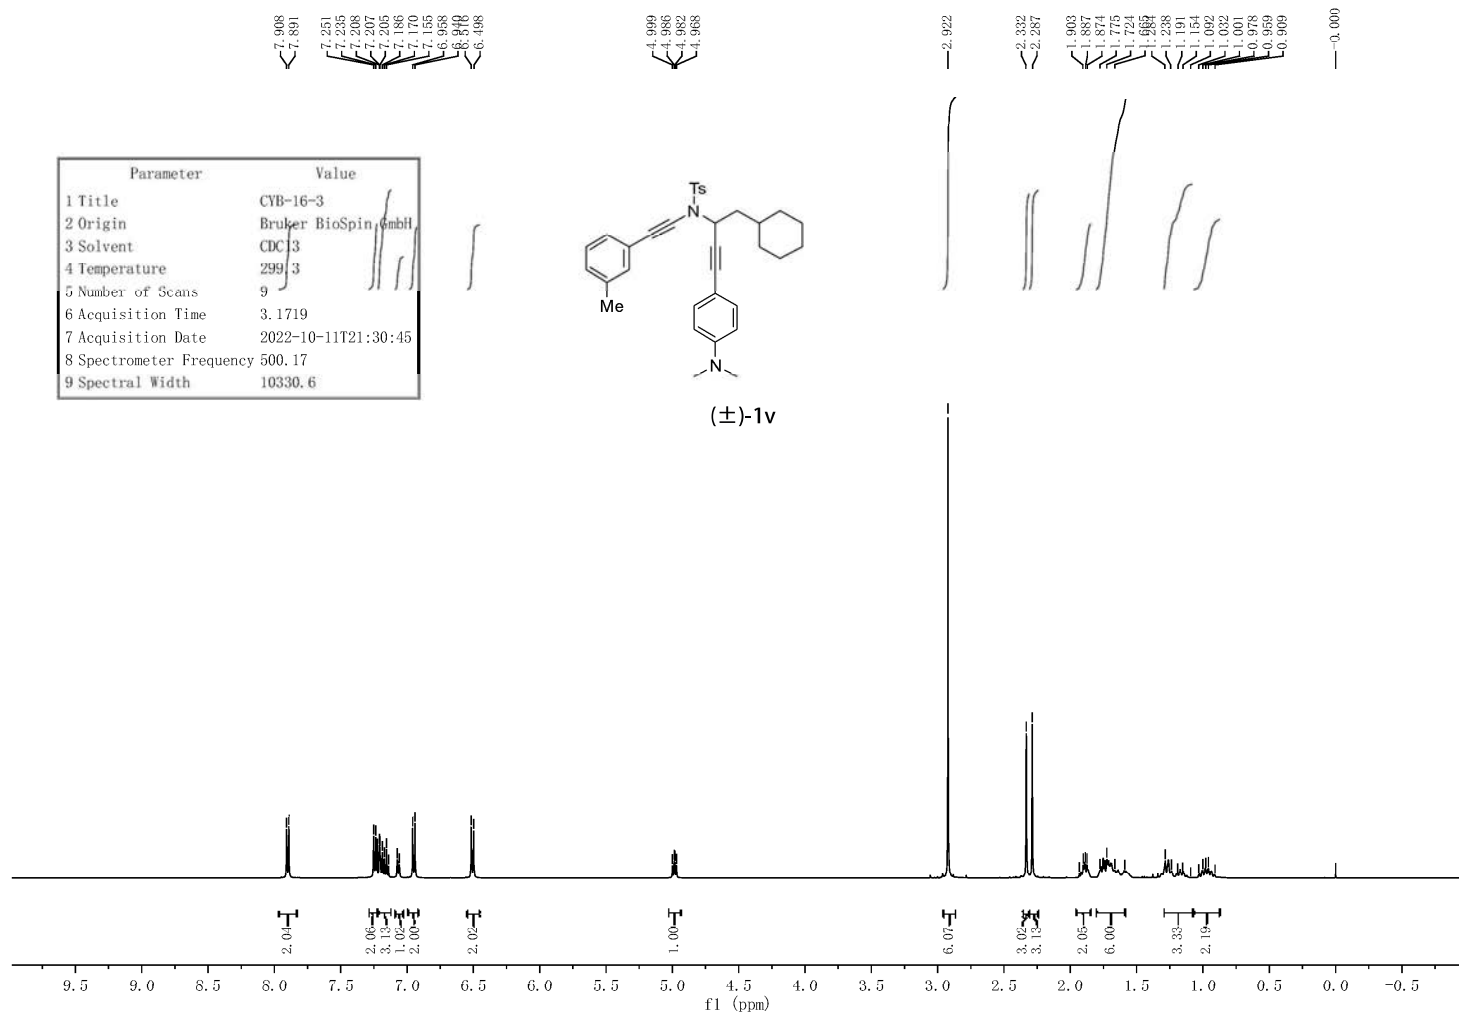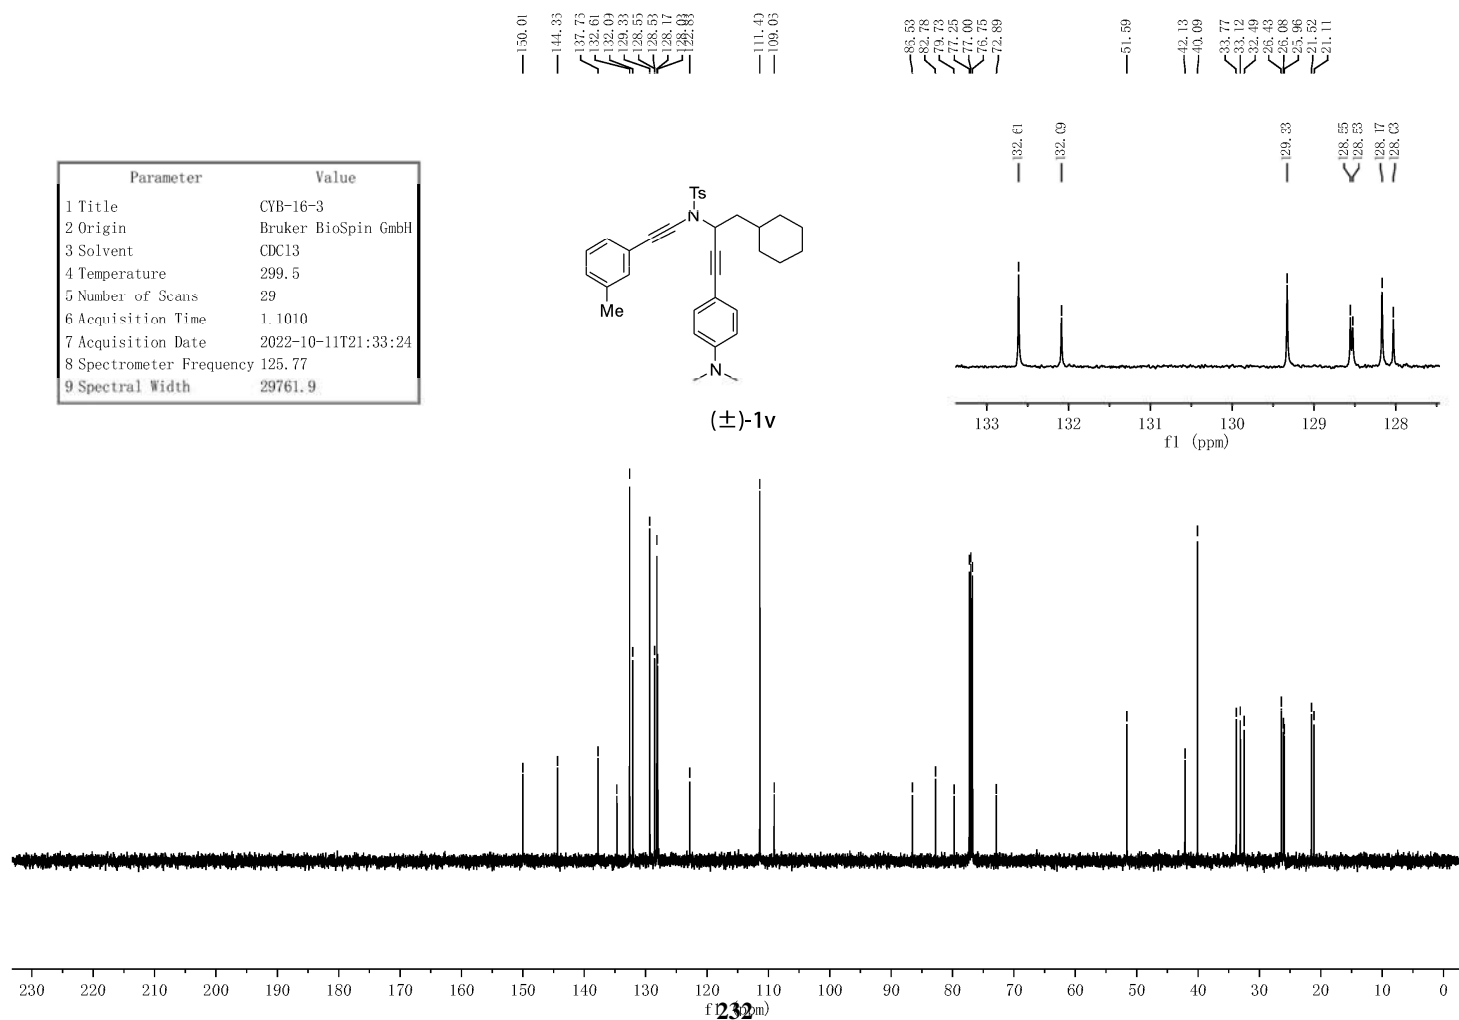

Supplementary Figure 132.  $^1\text{H}$  and  $^{13}\text{C}$  NMR spectra for (±)-1v



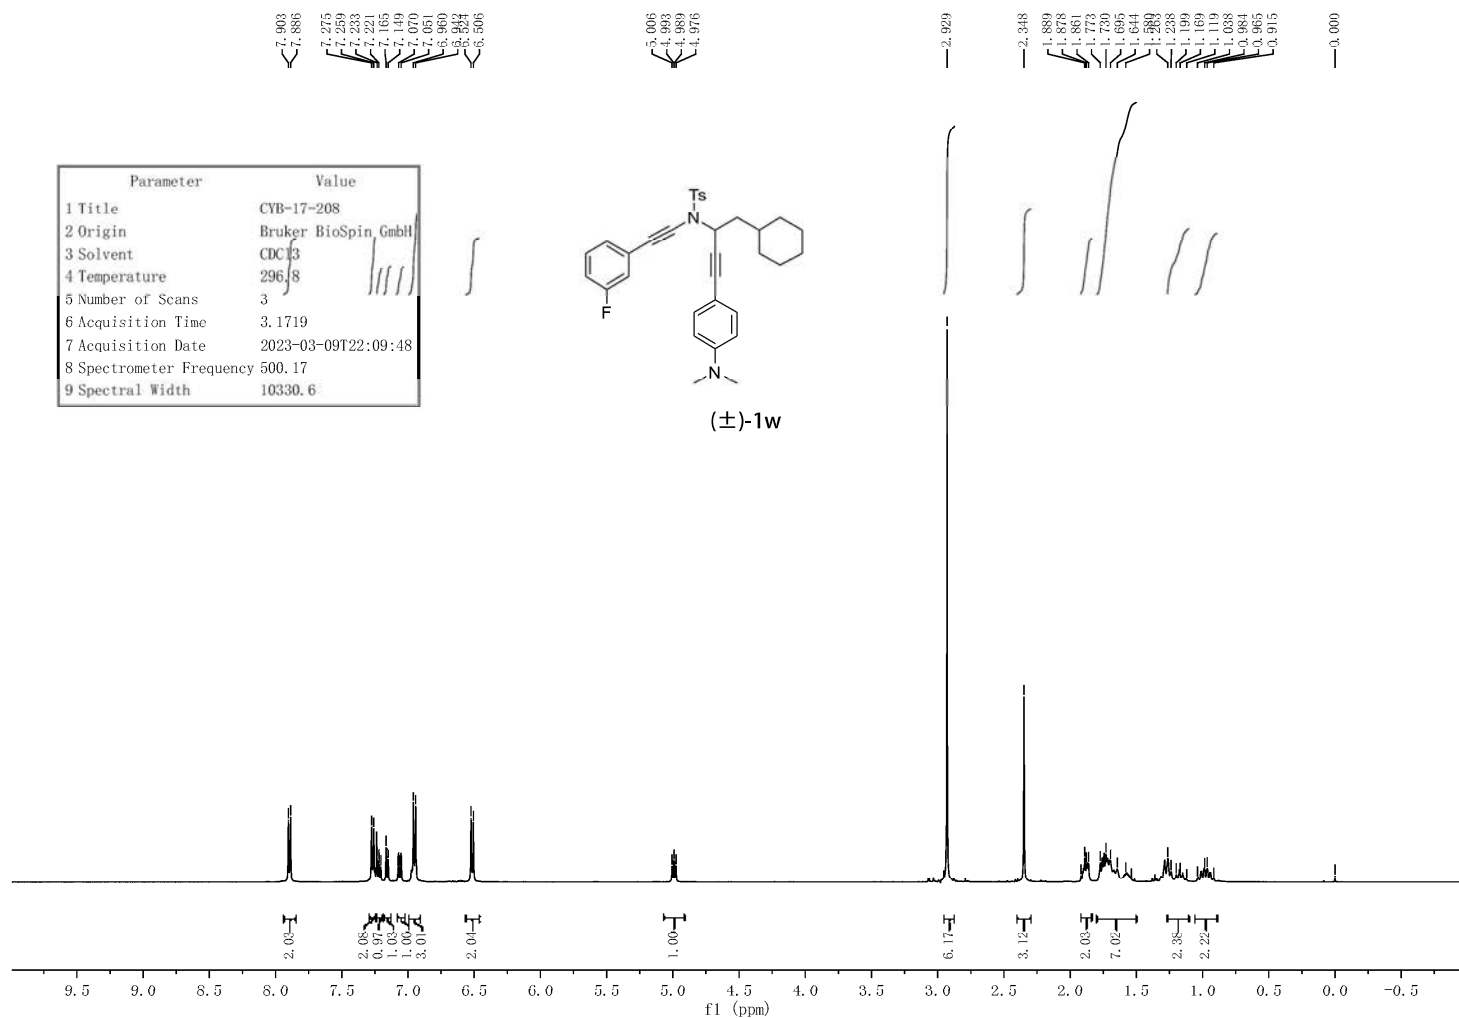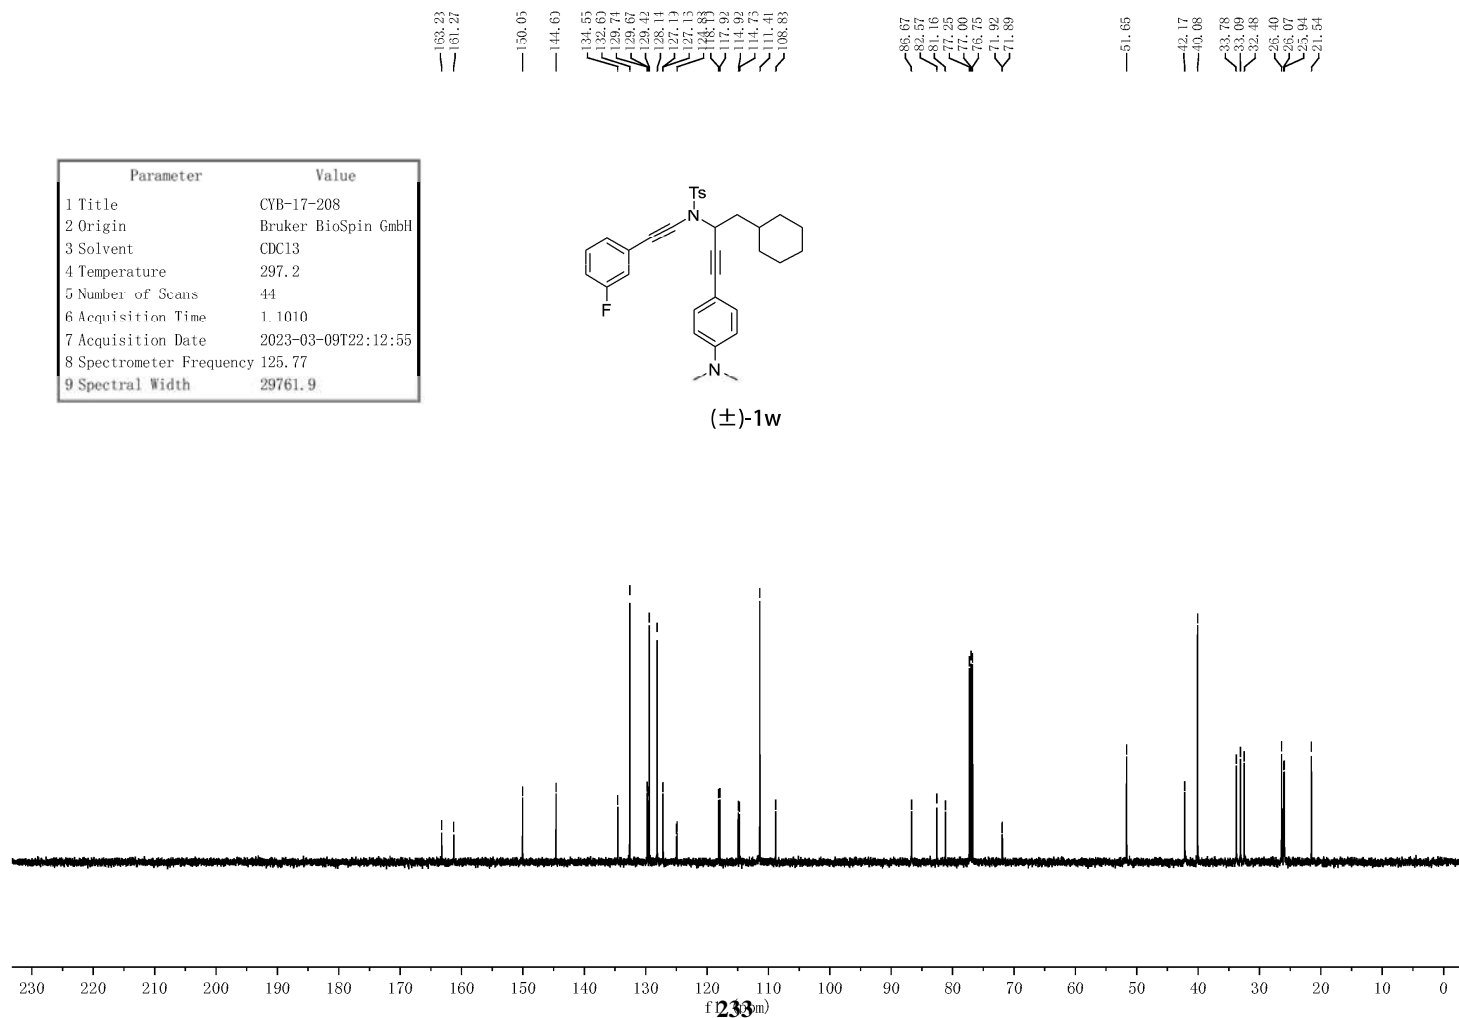

Supplementary Figure 133. <sup>1</sup>H and <sup>13</sup>C NMR spectra for (±)-1w

-113.25  
-113.28  
-113.29  
-113.31

| Parameter                | Value               |
|--------------------------|---------------------|
| 1 Title                  | CYB-17-XXX-F        |
| 2 Origin                 |                     |
| 3 Solvent                | CDC13               |
| 4 Temperature            | 298.1               |
| 5 Number of Scans        | 200                 |
| 6 Acquisition Time       | 1.0000              |
| 7 Acquisition Date       | 2023-03-11T09:49:47 |
| 8 Spectrometer Frequency | 376.28              |
| 9 Spectral Width         | 96153.0             |

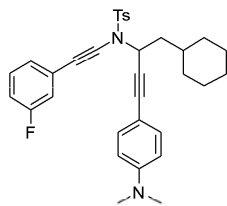

(±)-1w

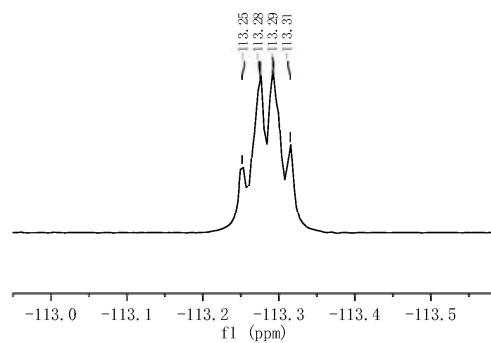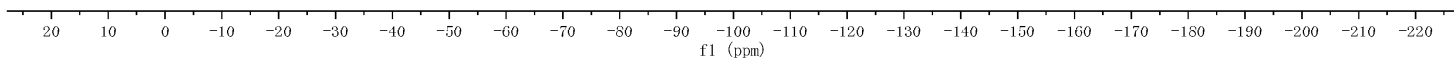

Supplementary Figure 134.  $^{19}\text{F}$  NMR spectra for (±)-1w

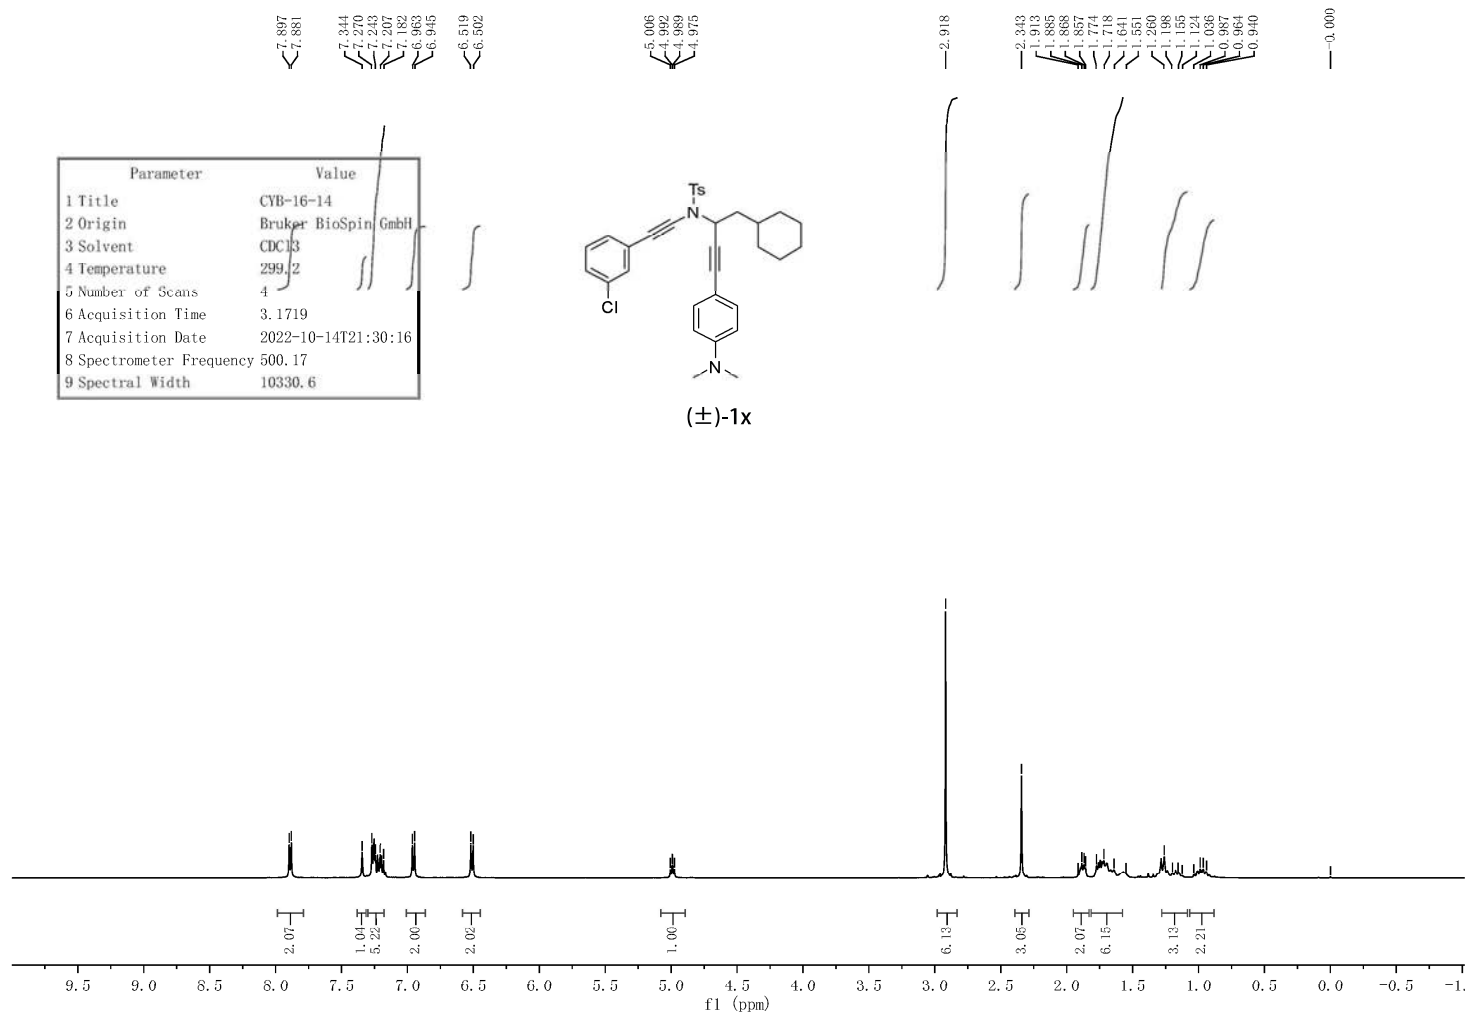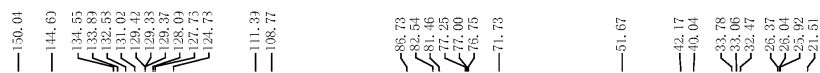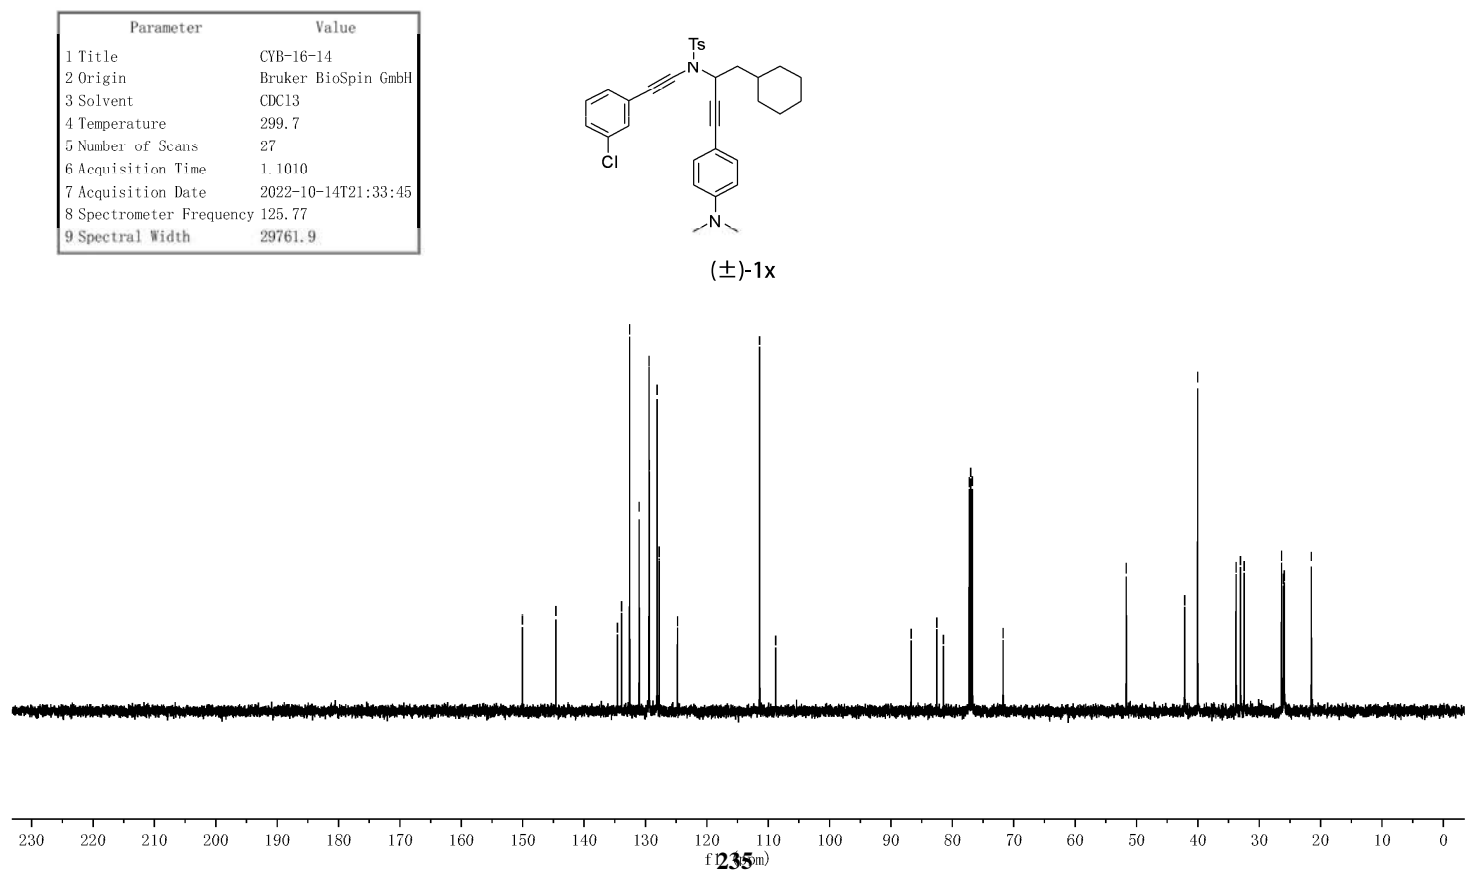

Supplementary Figure 135. <sup>1</sup>H and <sup>13</sup>C NMR spectra for (±)-1x

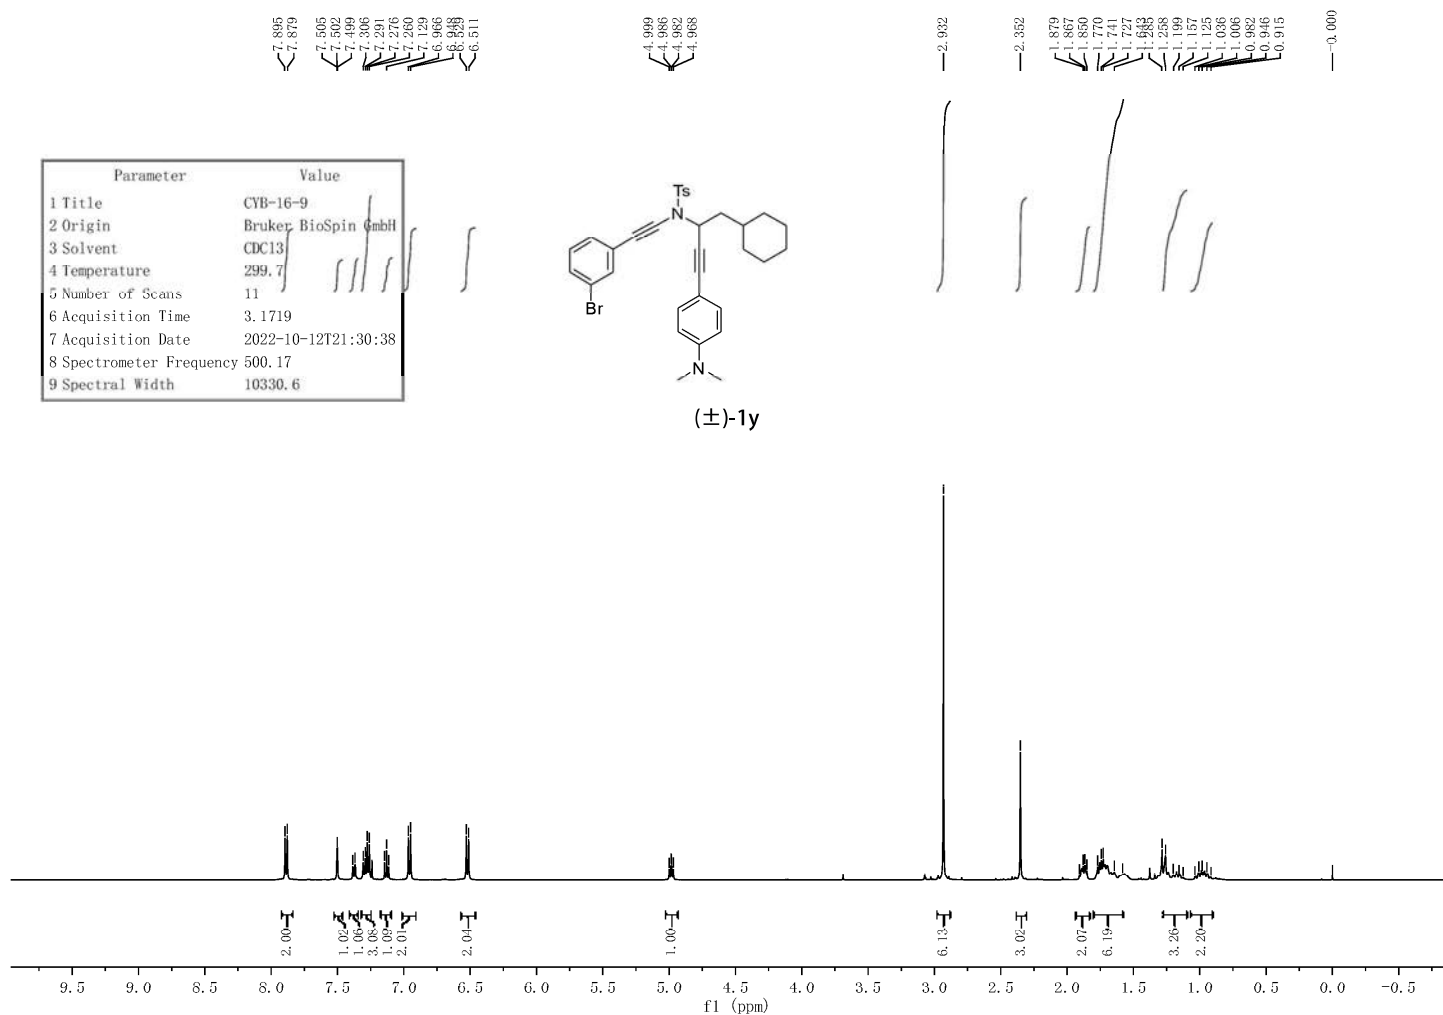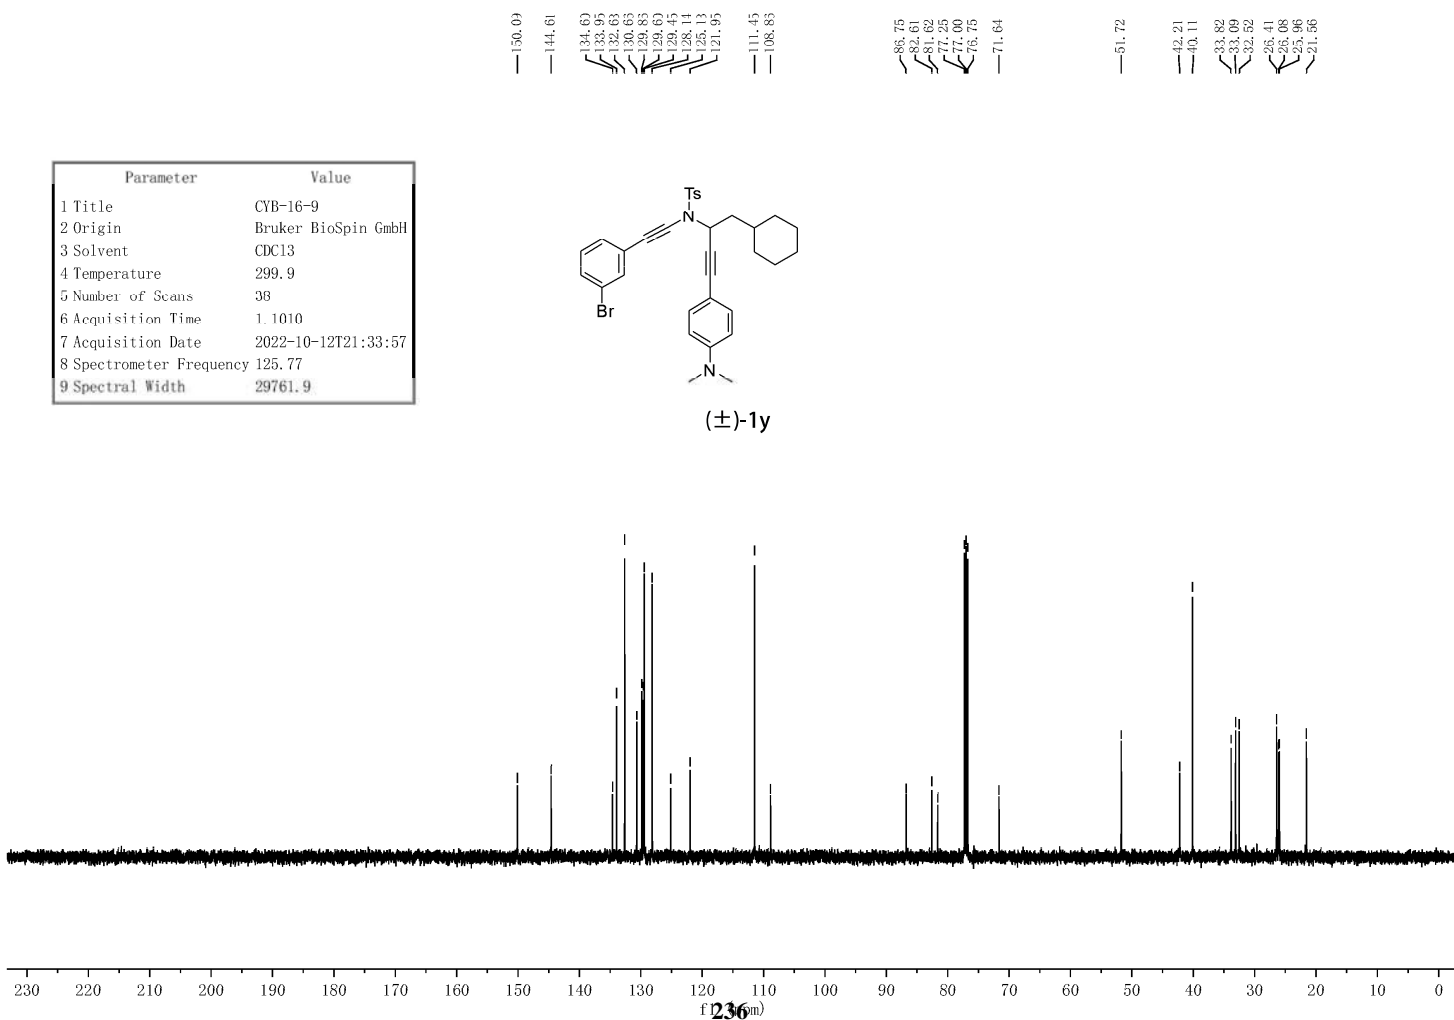

Supplementary Figure 136.  $^1\text{H}$  and  $^{13}\text{C}$  NMR spectra for (±)-1y

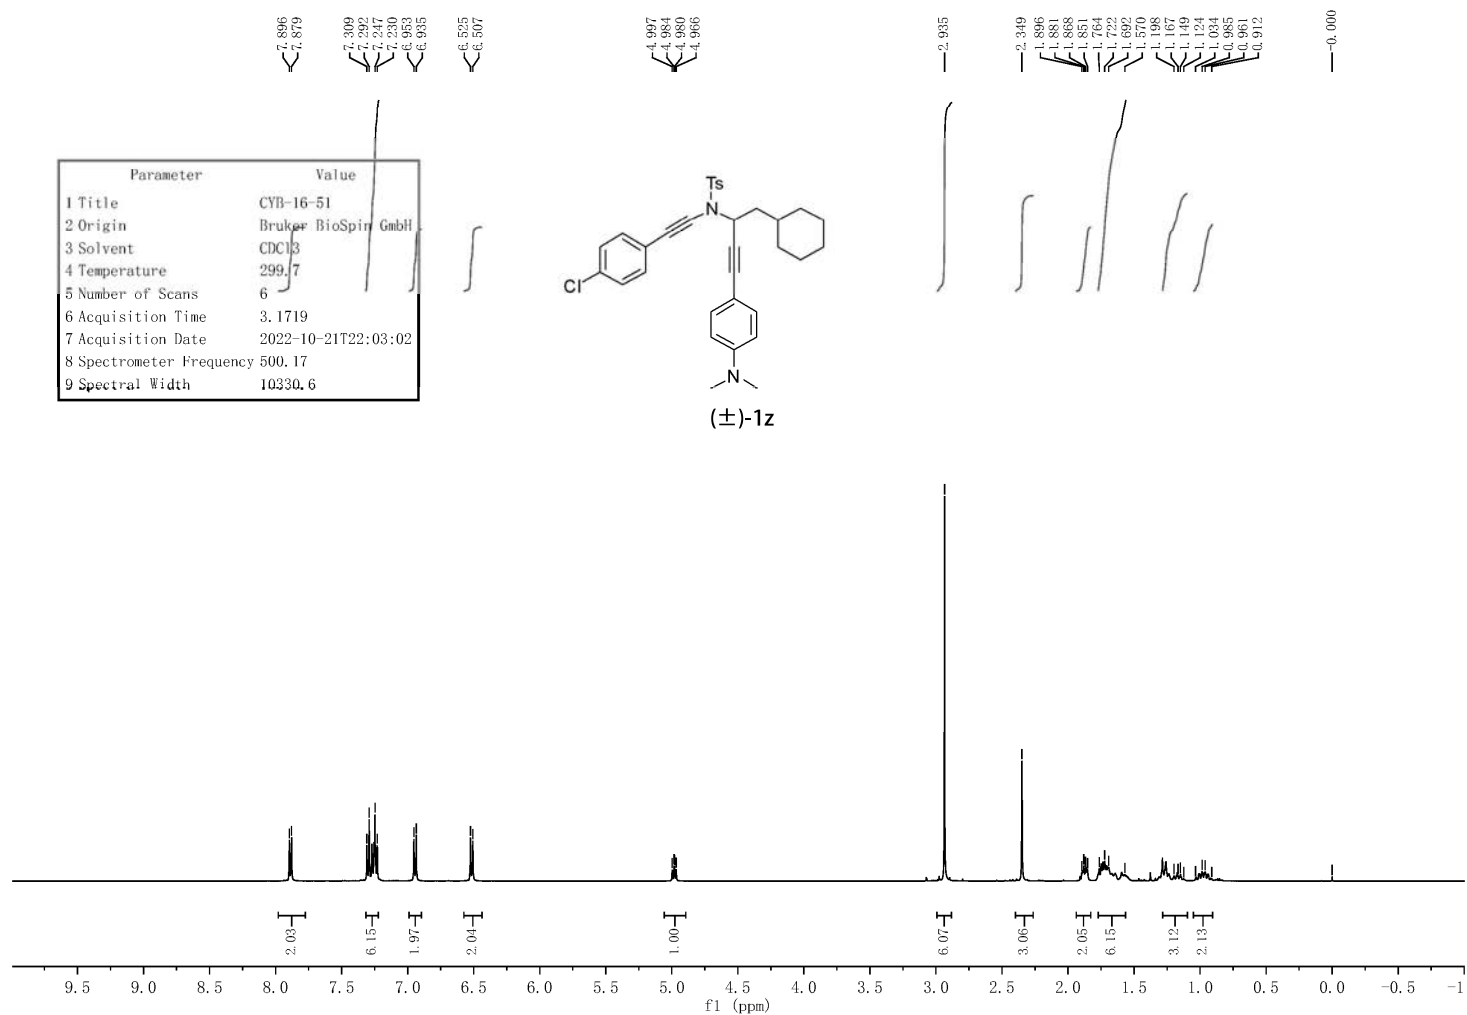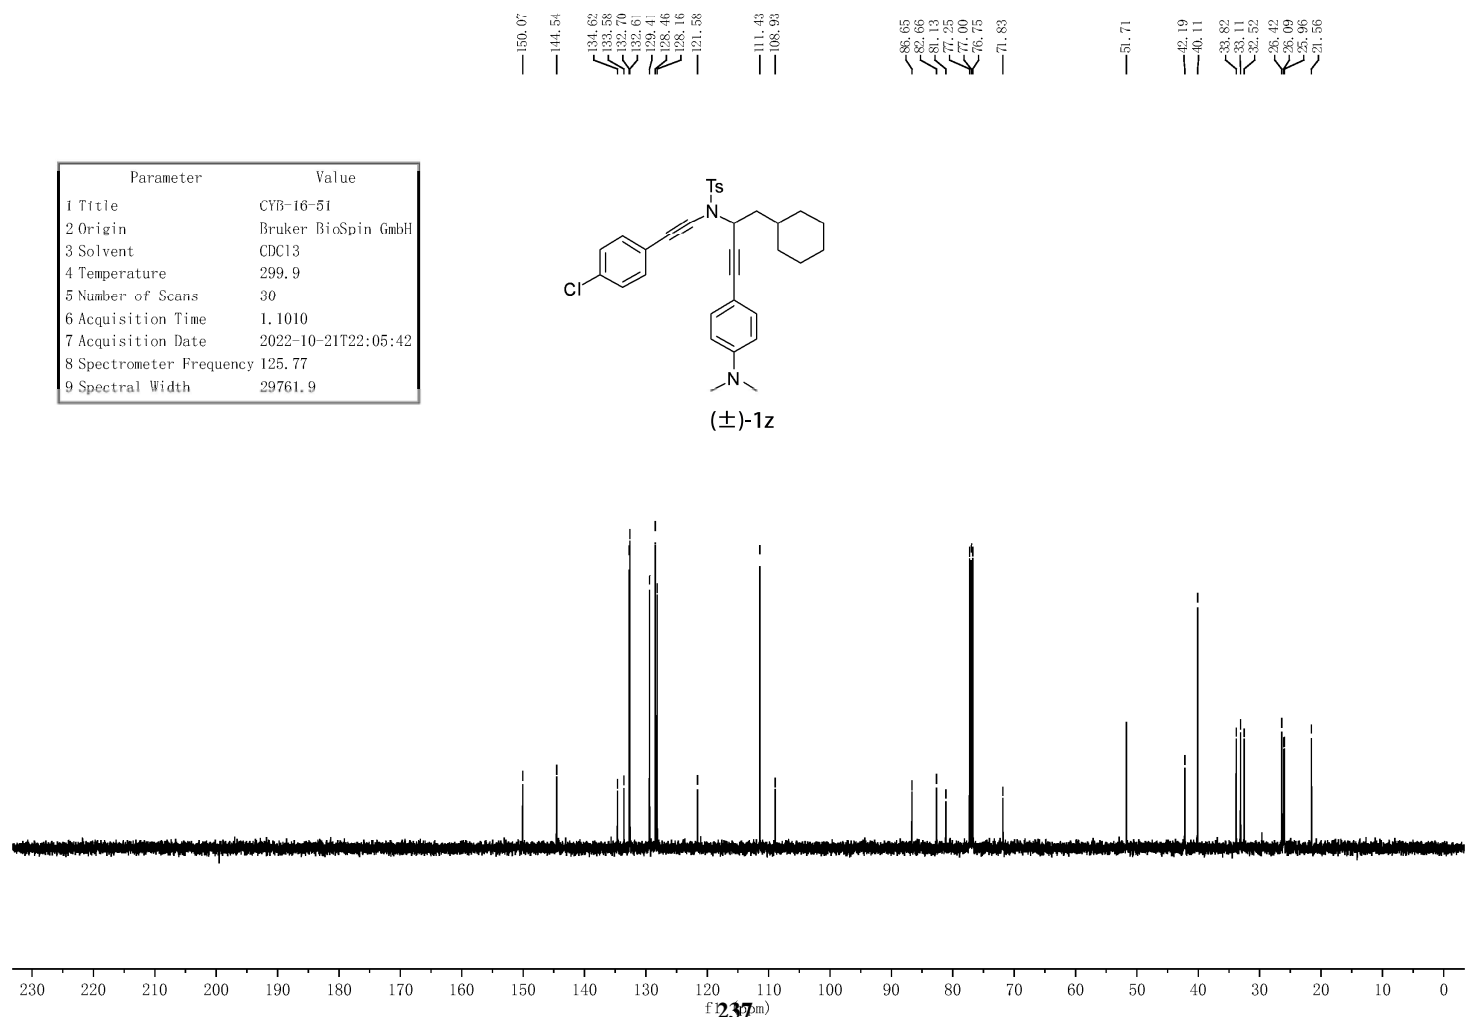

Supplementary Figure 137. <sup>1</sup>H and <sup>13</sup>C NMR spectra for (±)-1z

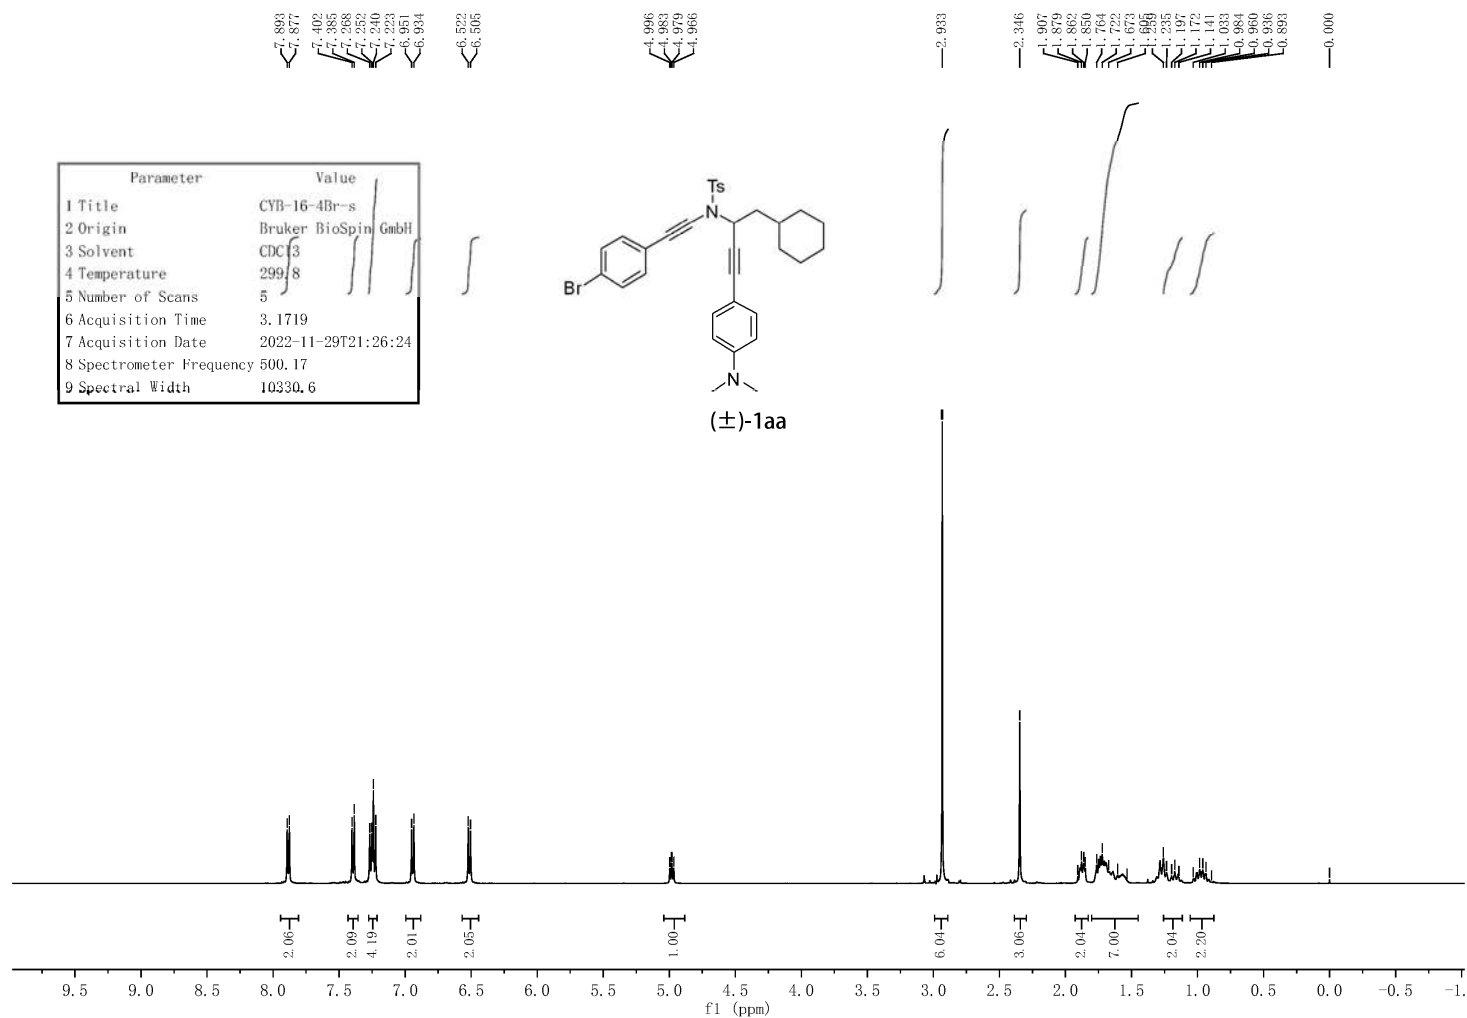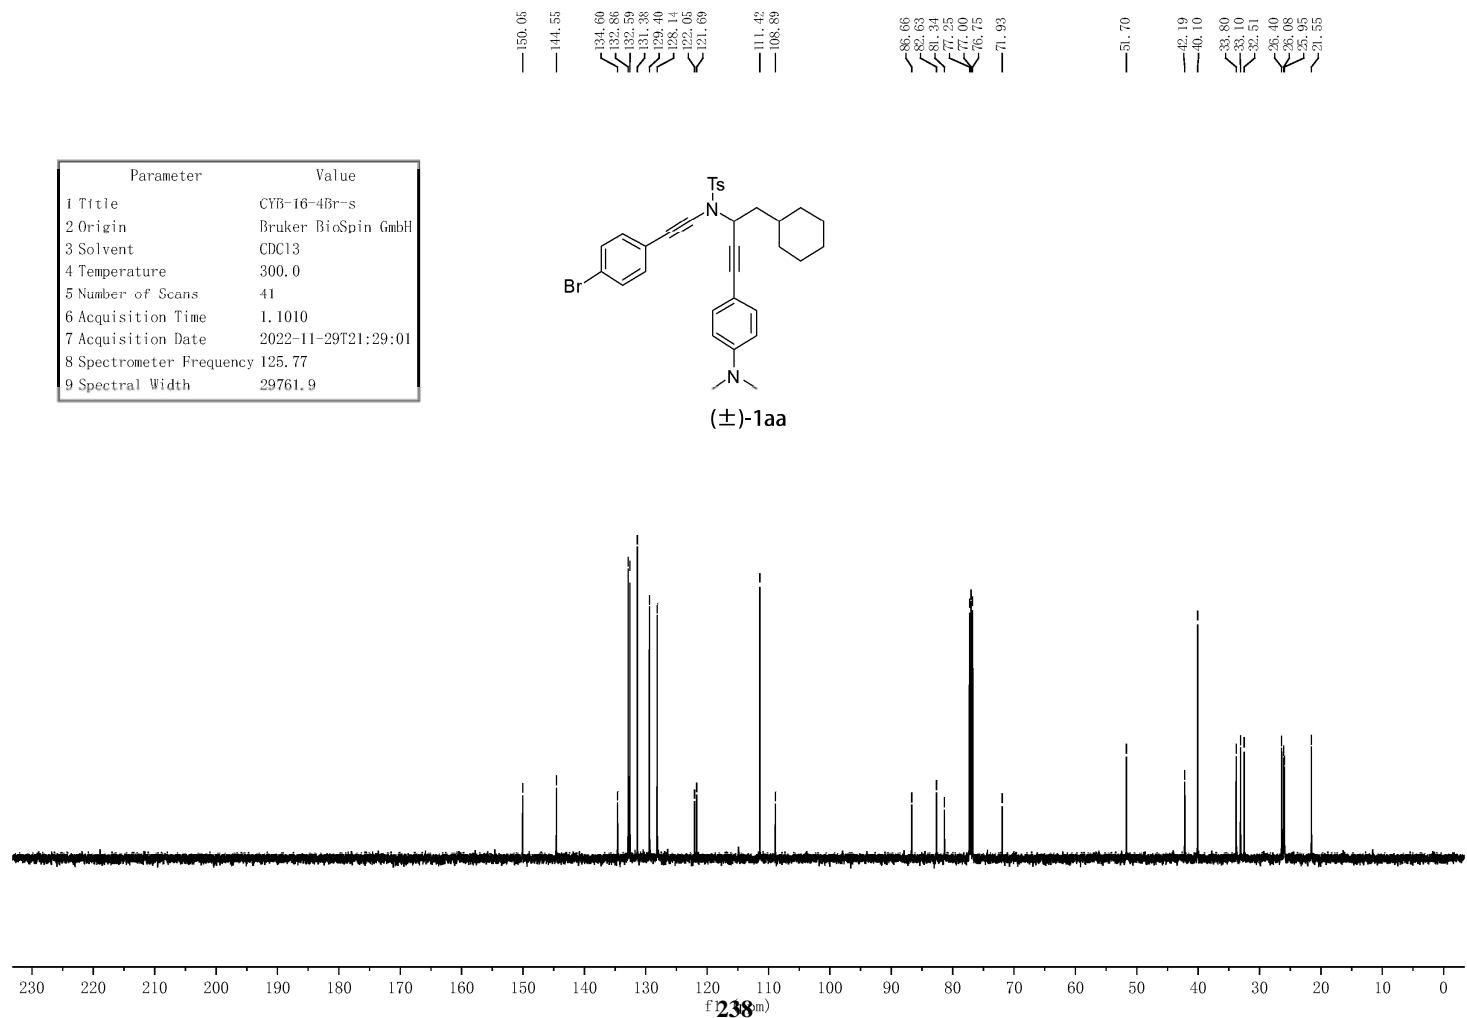

Supplementary Figure 138. <sup>1</sup>H and <sup>13</sup>C NMR spectra for (±)-1aa

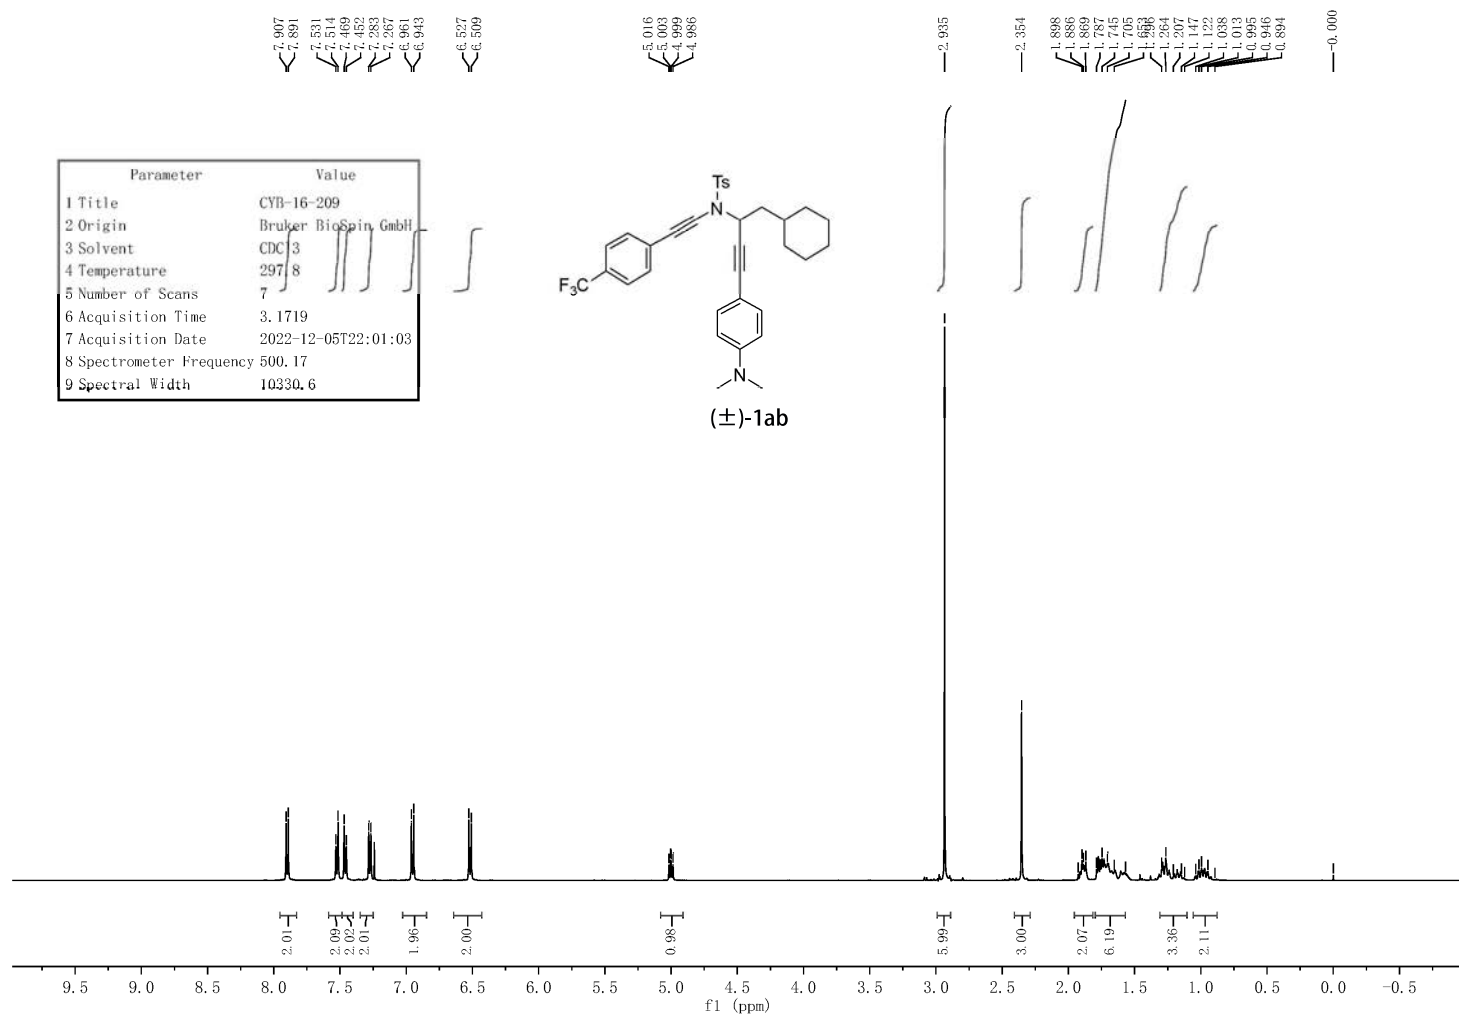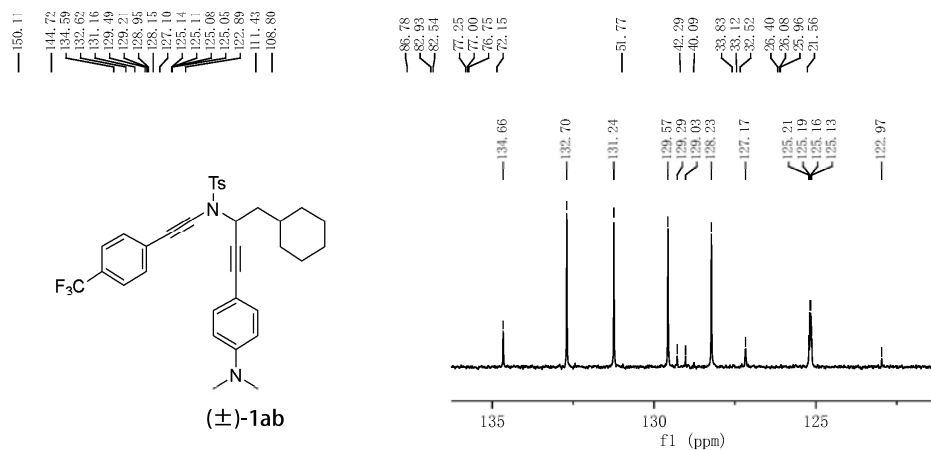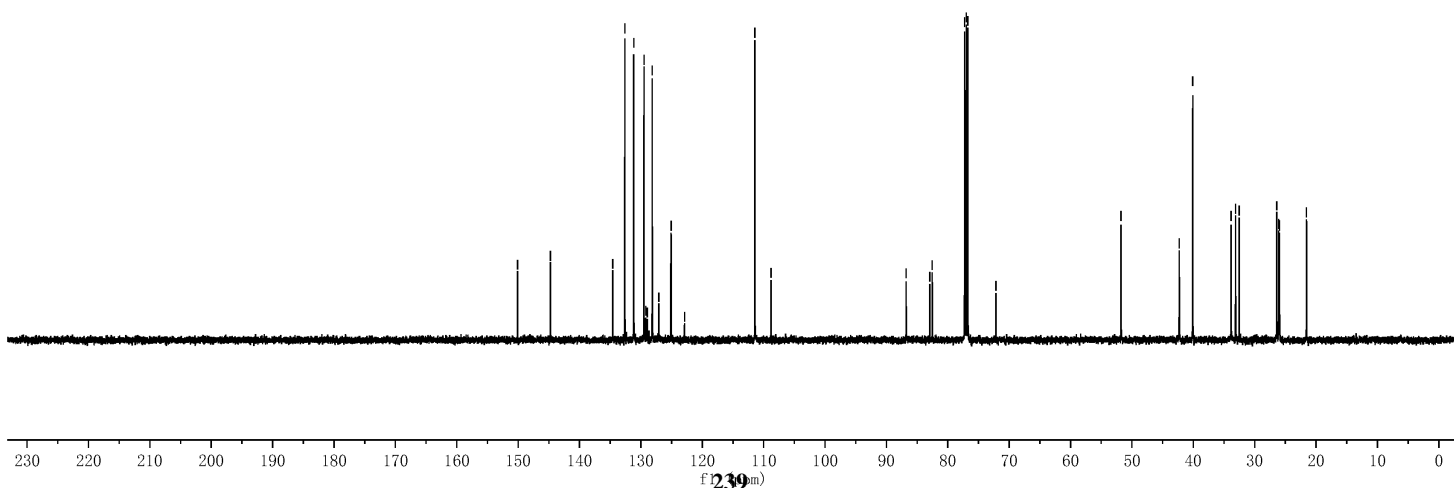

Supplementary Figure 139.  $^1\text{H}$  and  $^{13}\text{C}$  NMR spectra for **(±)-1ab**

| Parameter                | Value               |
|--------------------------|---------------------|
| 1 Title                  | CYB 16 209 19F NMR  |
| 2 Origin                 |                     |
| 3 Solvent                | CDC13               |
| 4 Temperature            | 297.8               |
| 5 Number of Scans        | 16                  |
| 6 Acquisition Time       | 1.0000              |
| 7 Acquisition Date       | 2022-12-06T07:47:23 |
| 8 Spectrometer Frequency | 376.28              |
| 9 Spectral Width         | 96153.0             |

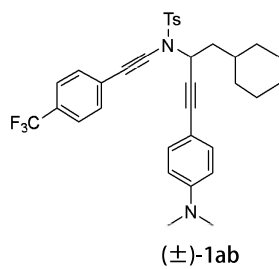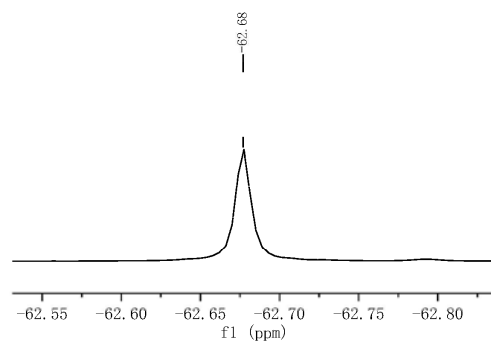

-62.68

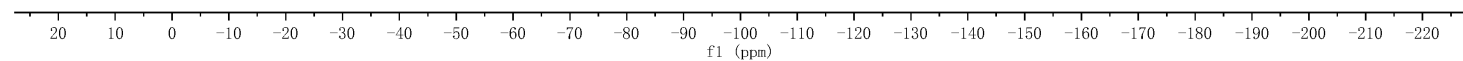

Supplementary Figure 140.  $^{19}\text{F}$  NMR spectra for (±)-1ab



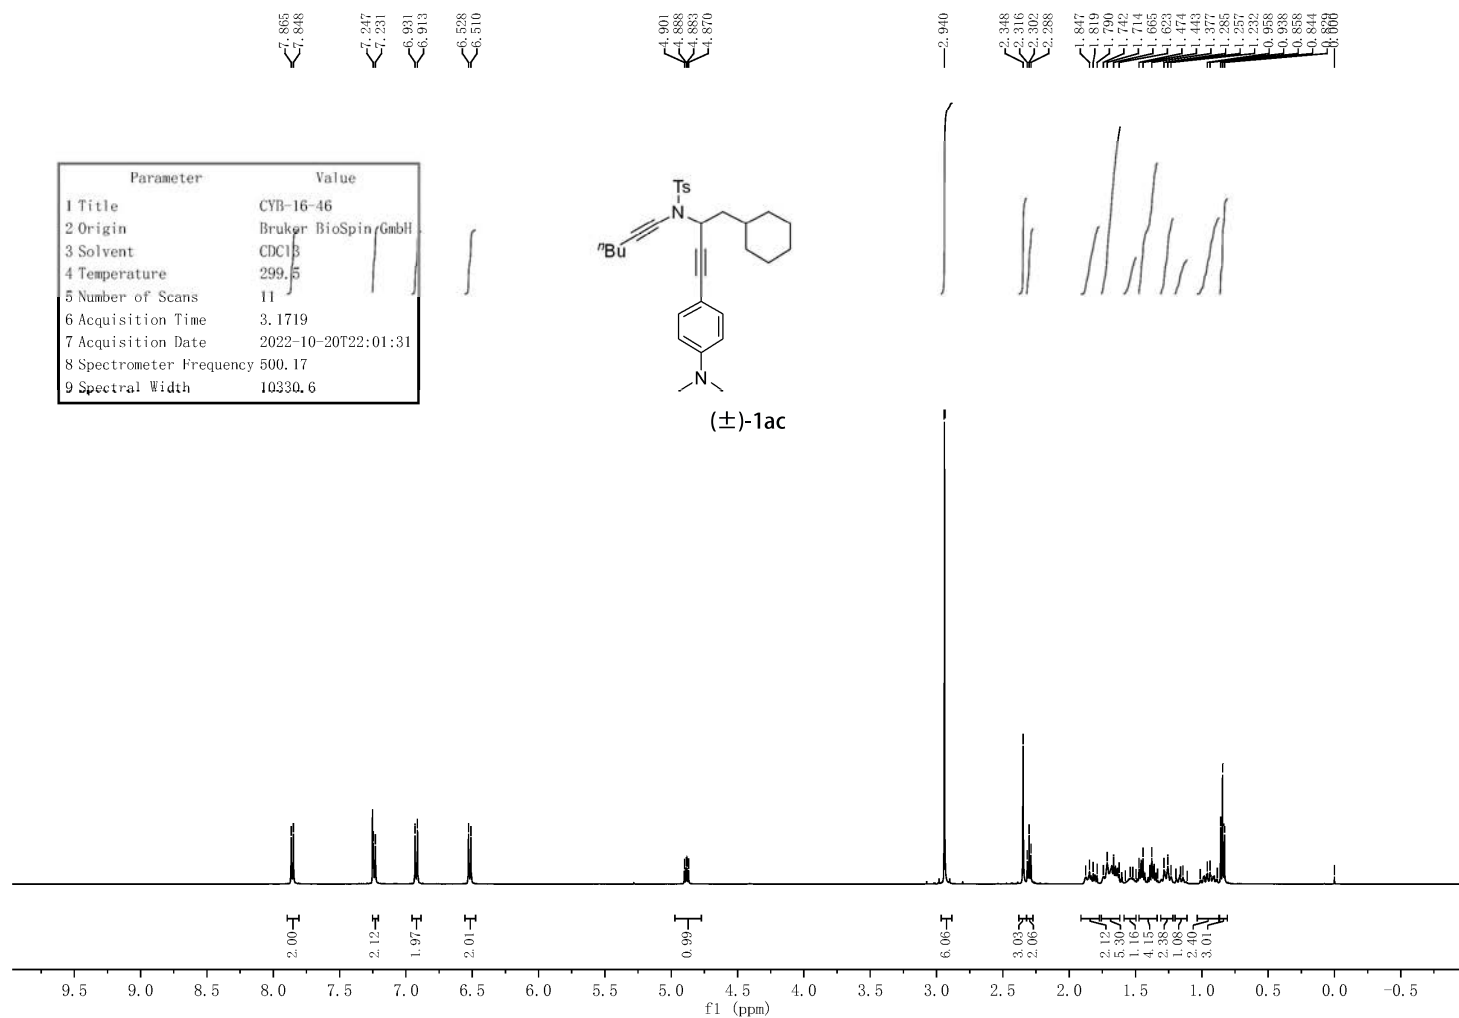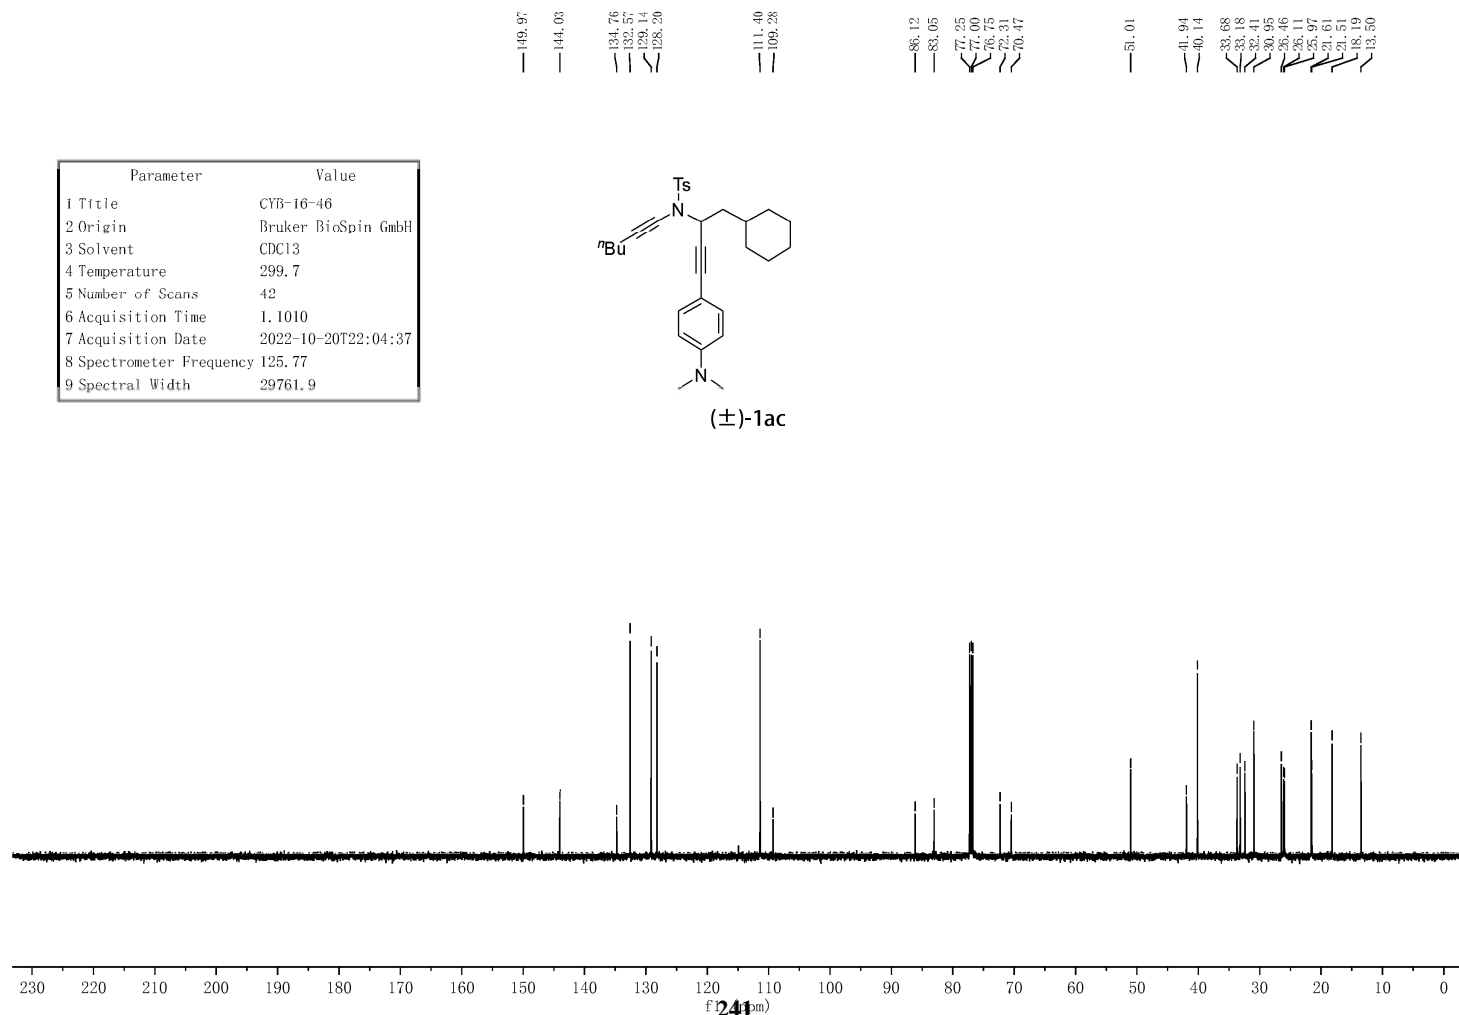

Supplementary Figure 141. <sup>1</sup>H and <sup>13</sup>C NMR spectra for (±)-1ac

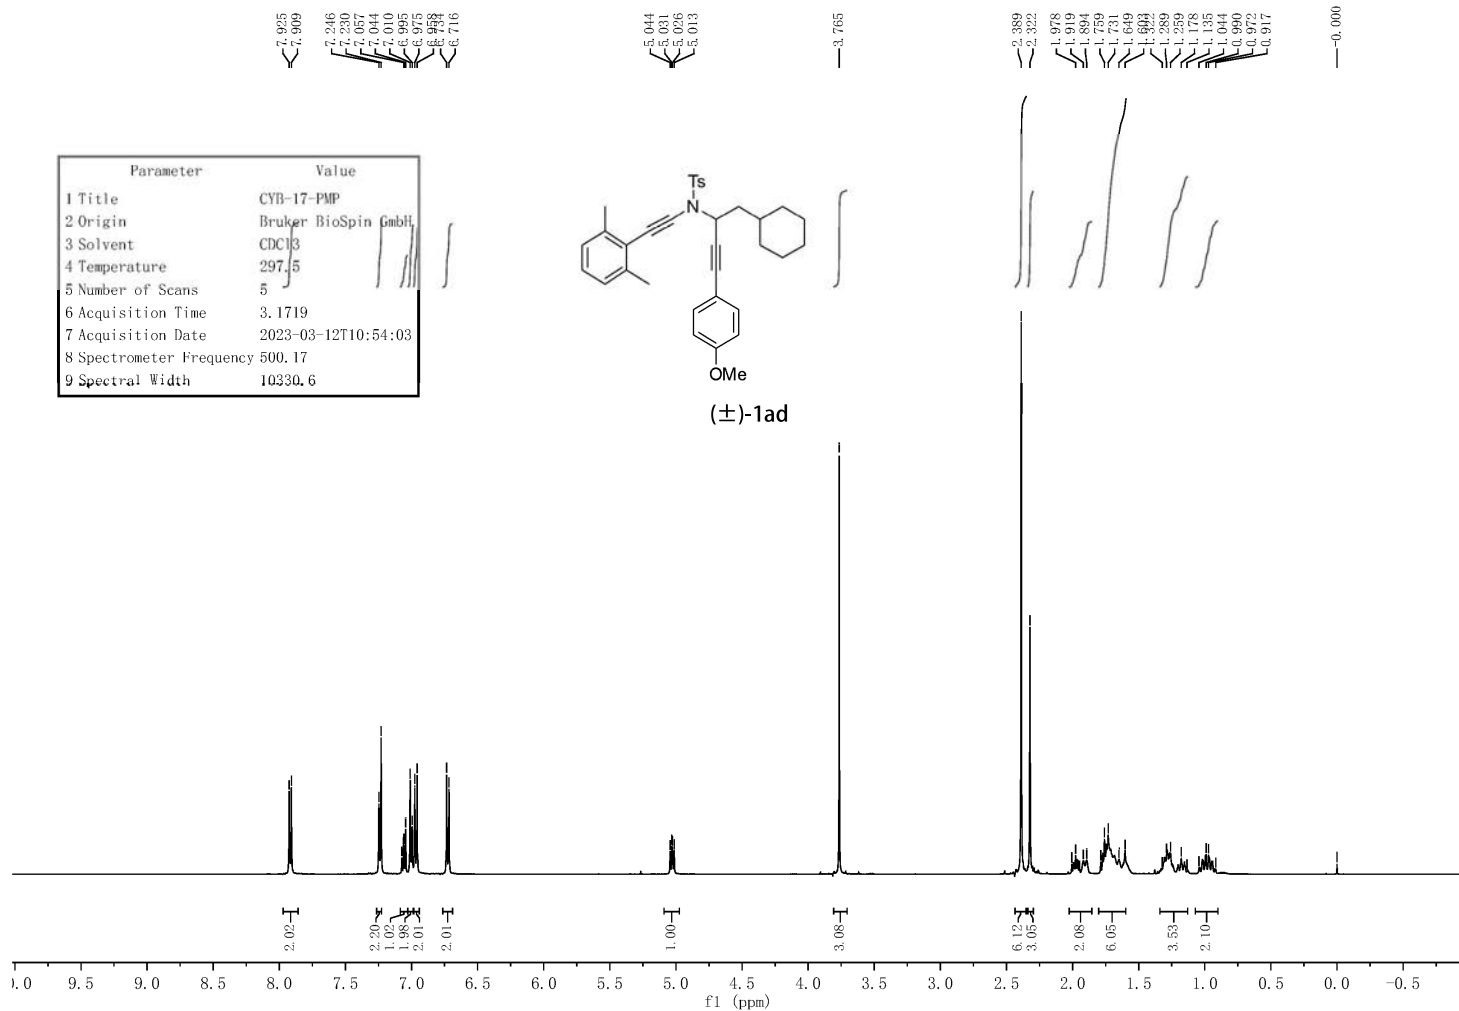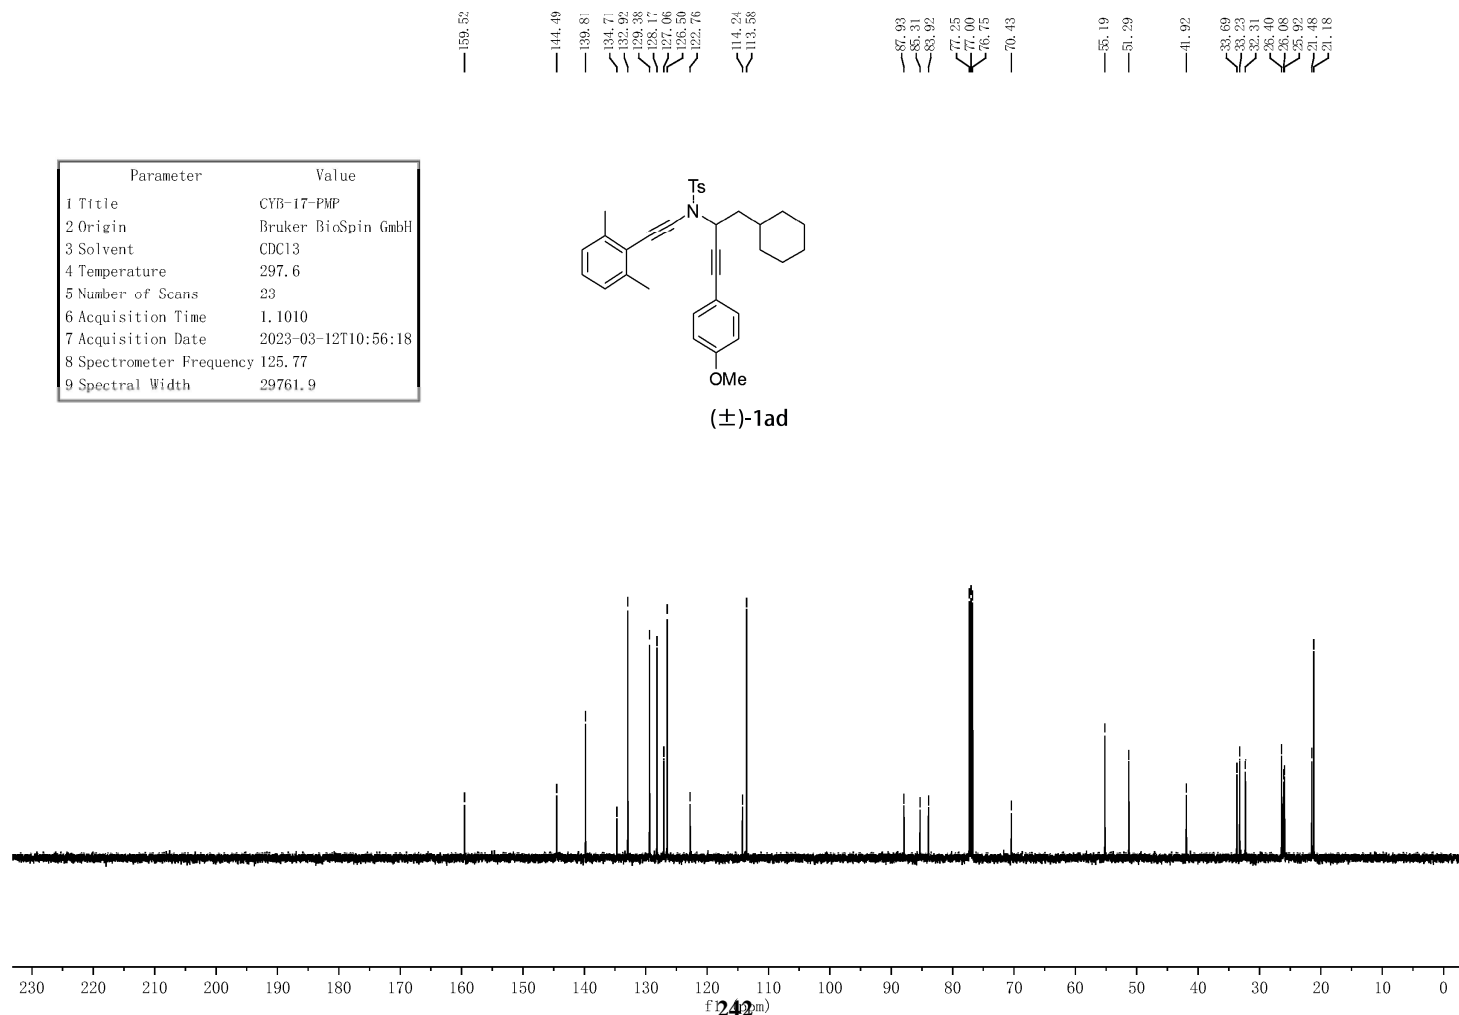

Supplementary Figure 142. <sup>1</sup>H and <sup>13</sup>C NMR spectra for (±)-1ad

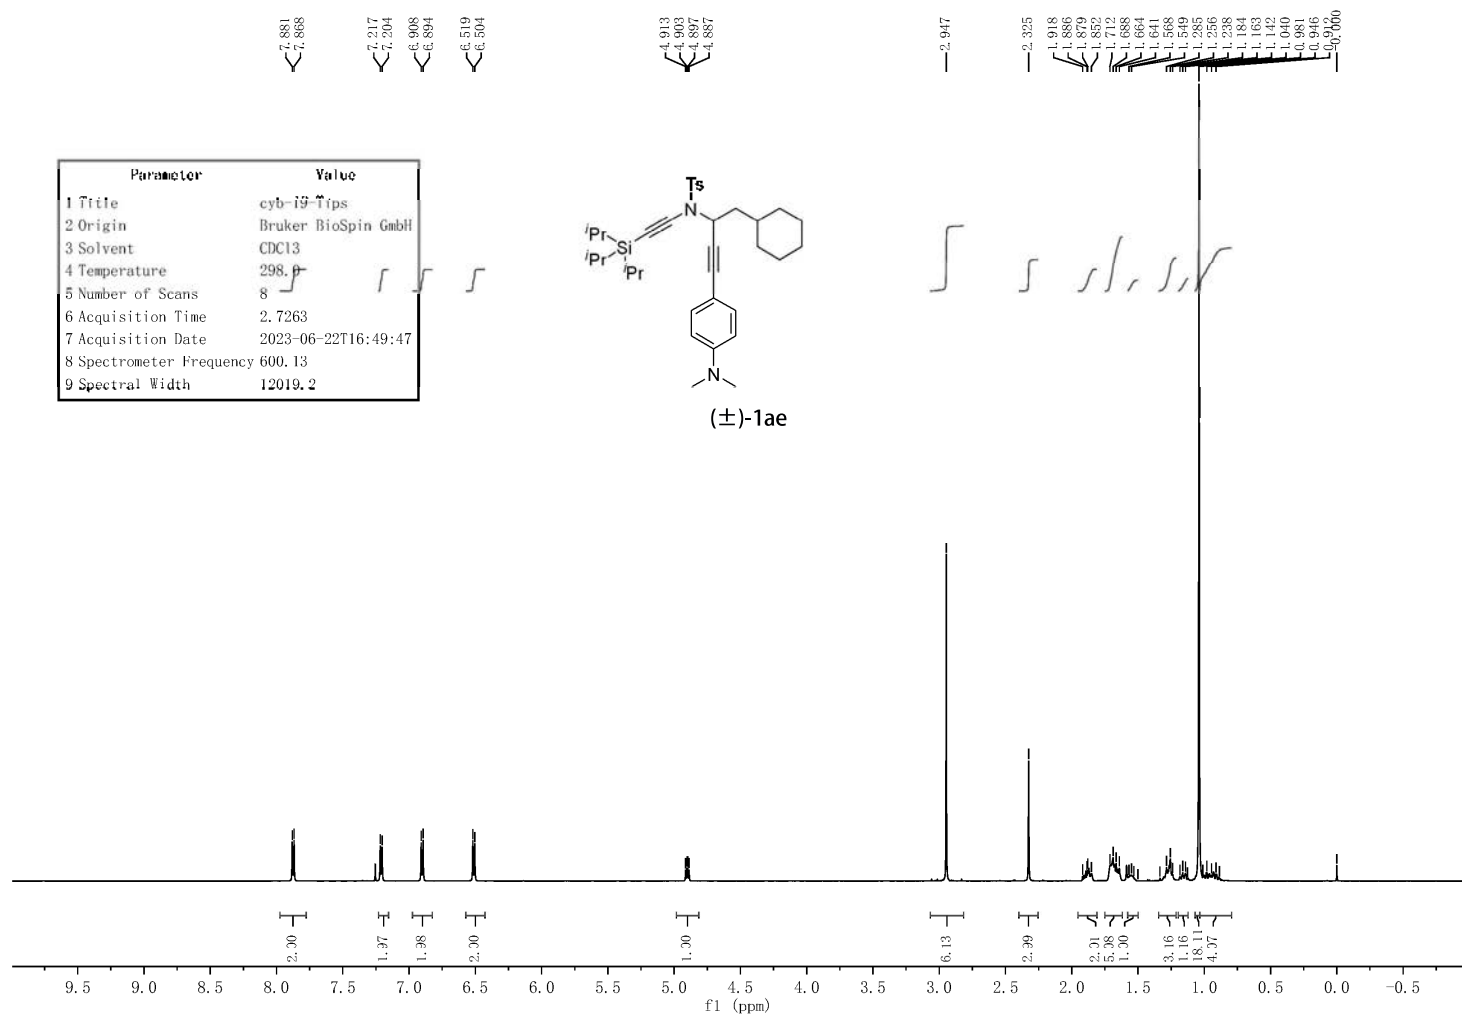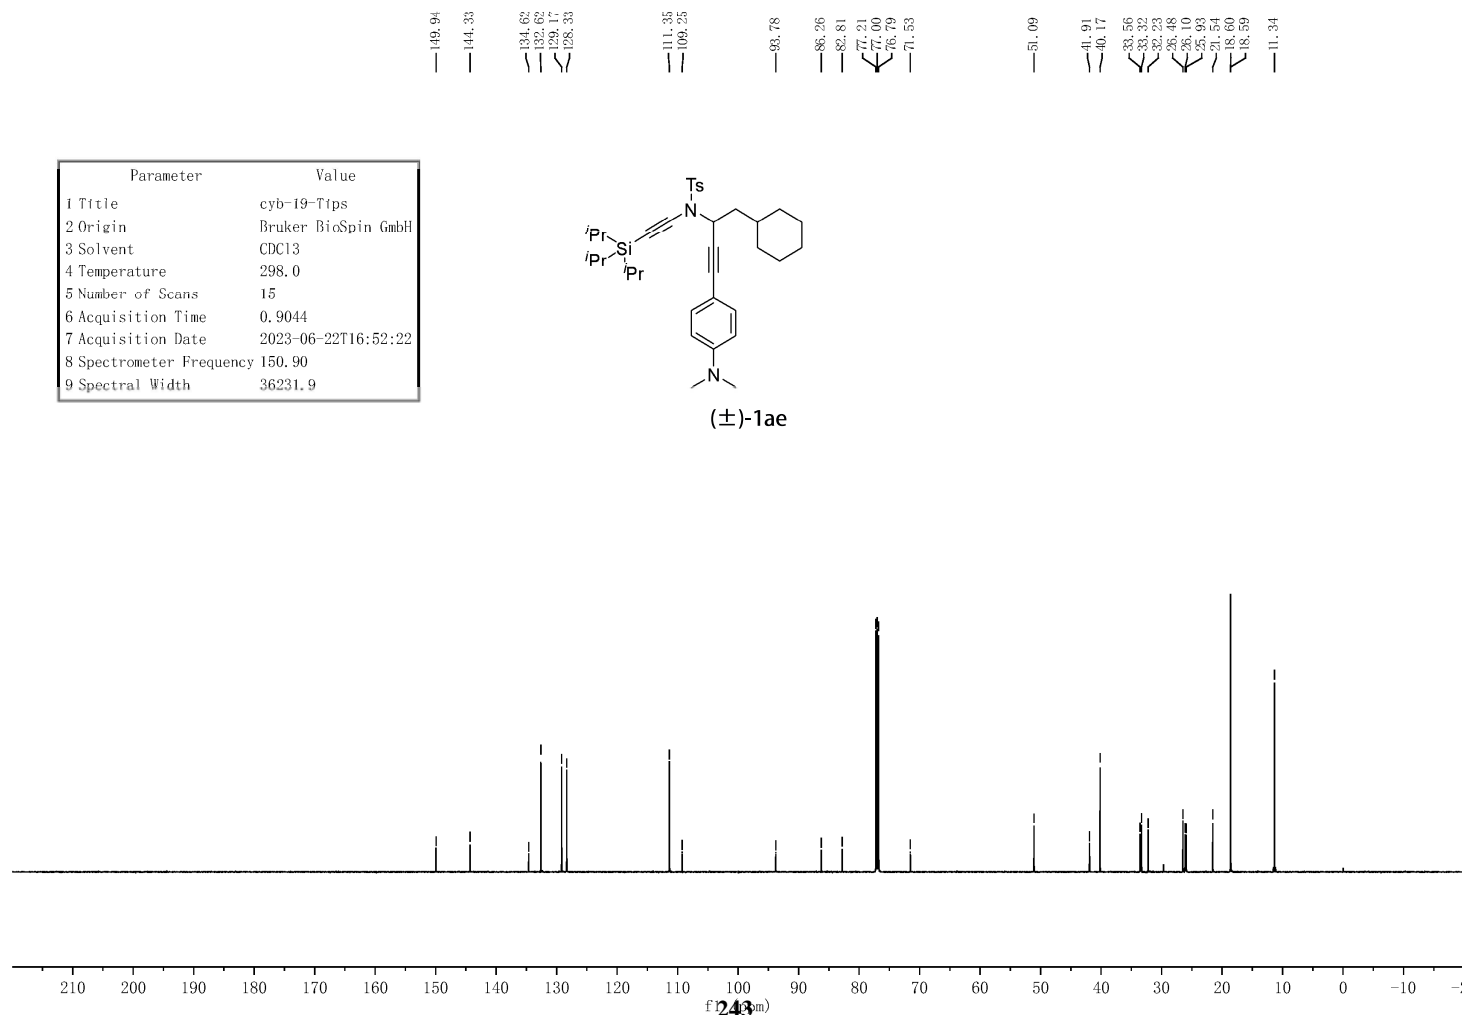

Supplementary Figure 143.  $^1\text{H}$  and  $^{13}\text{C}$  NMR spectra for (±)-1ae

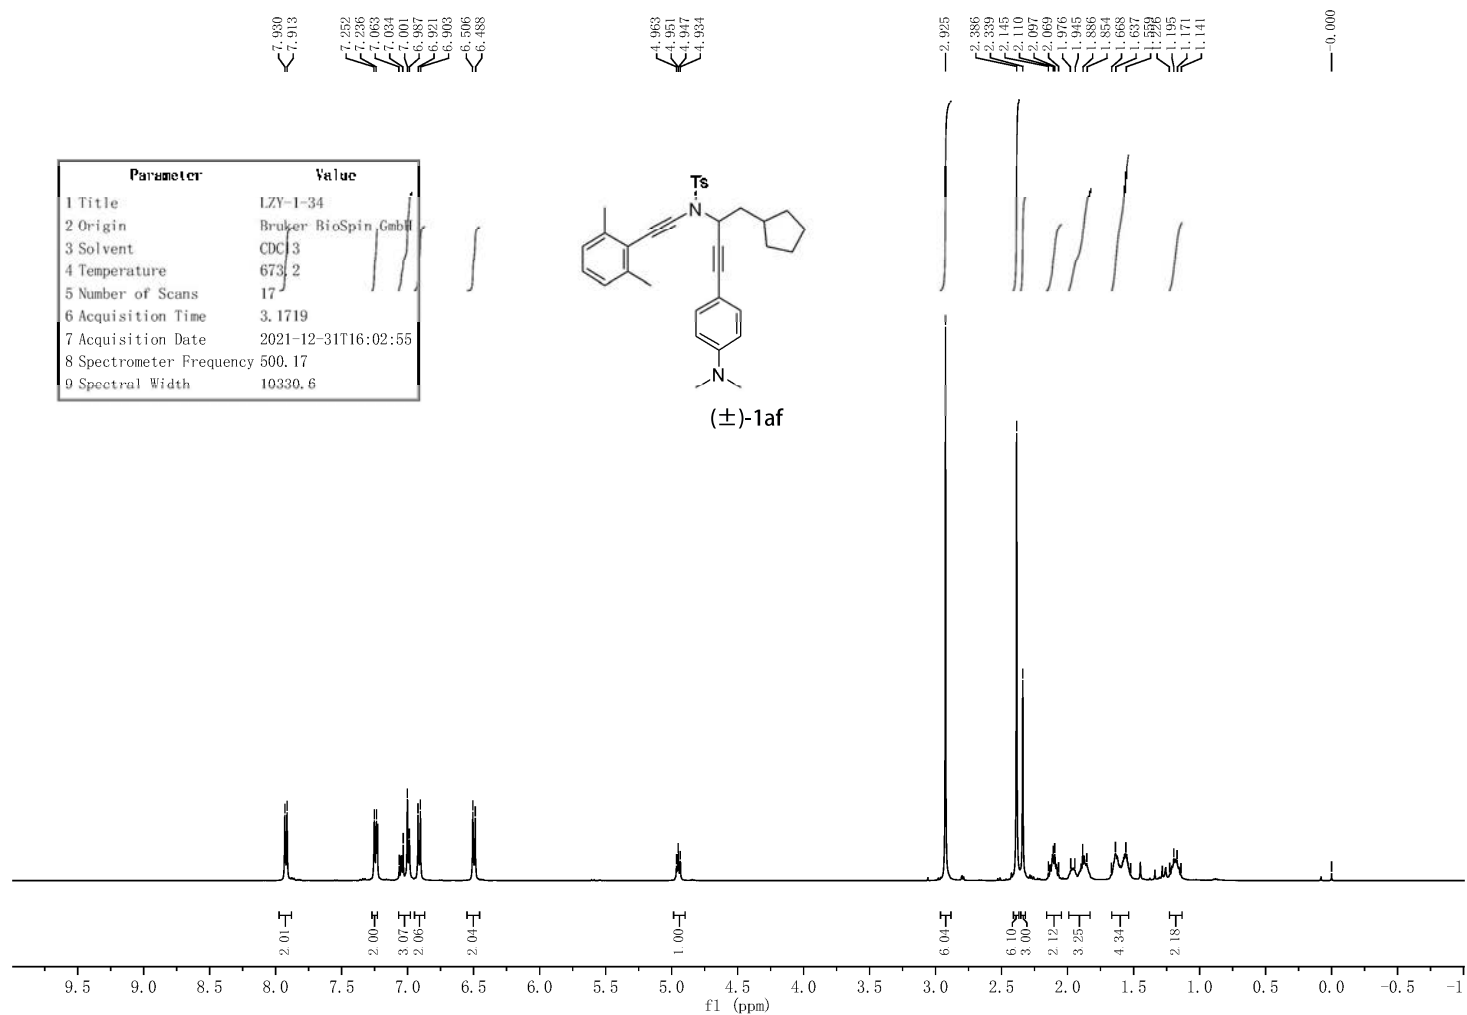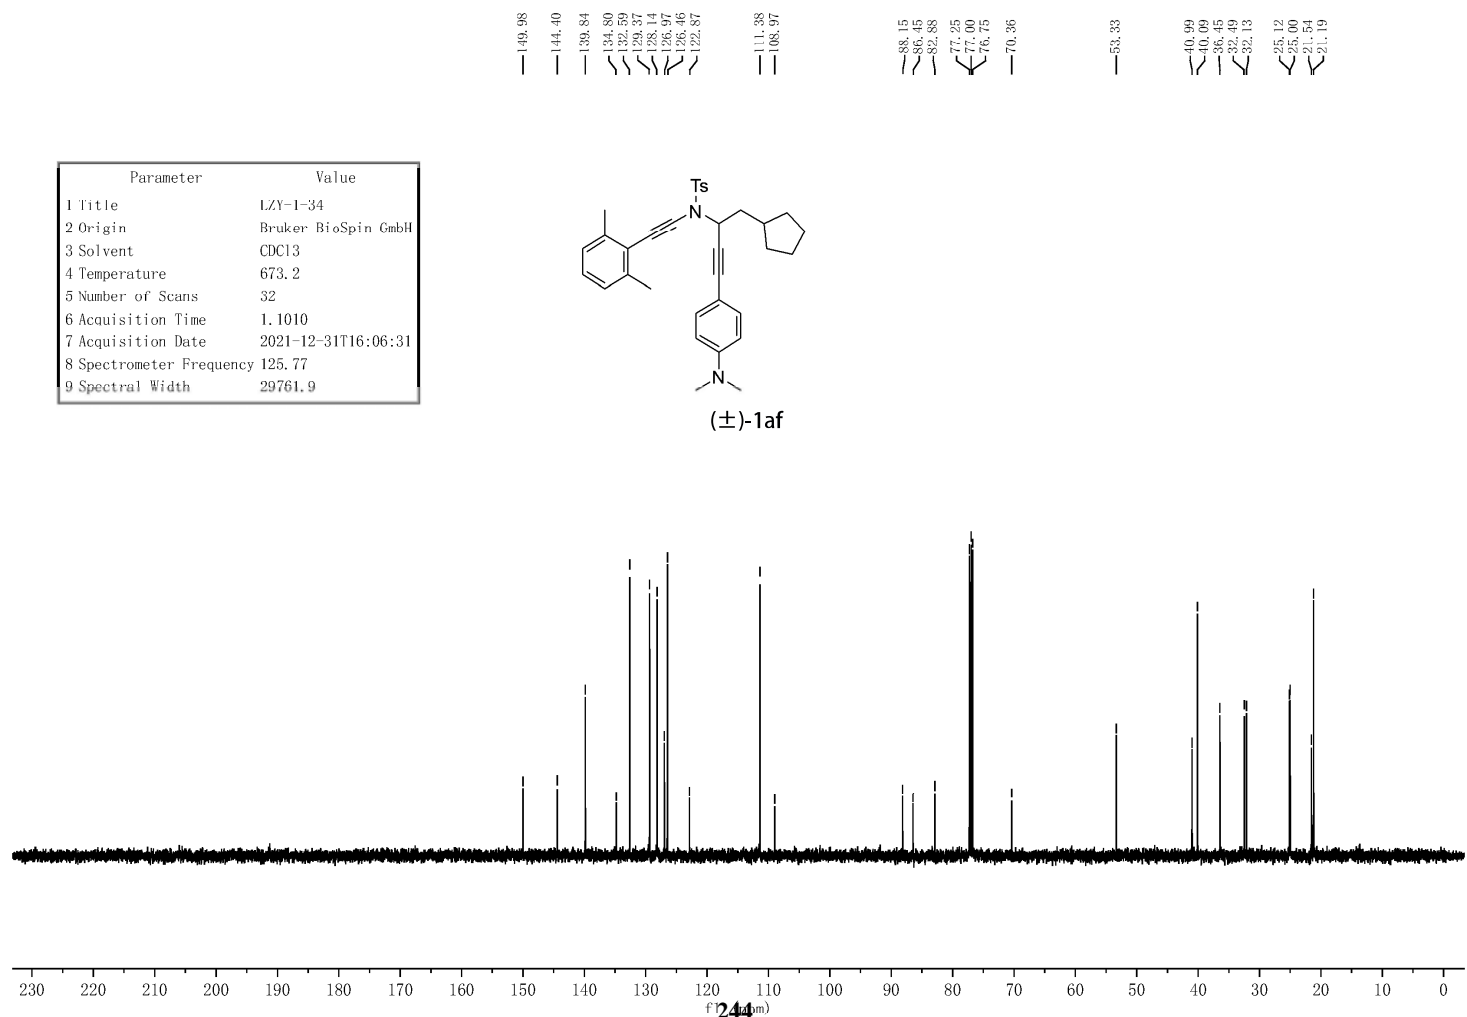

Supplementary Figure 144. <sup>1</sup>H and <sup>13</sup>C NMR spectra for (±)-1af

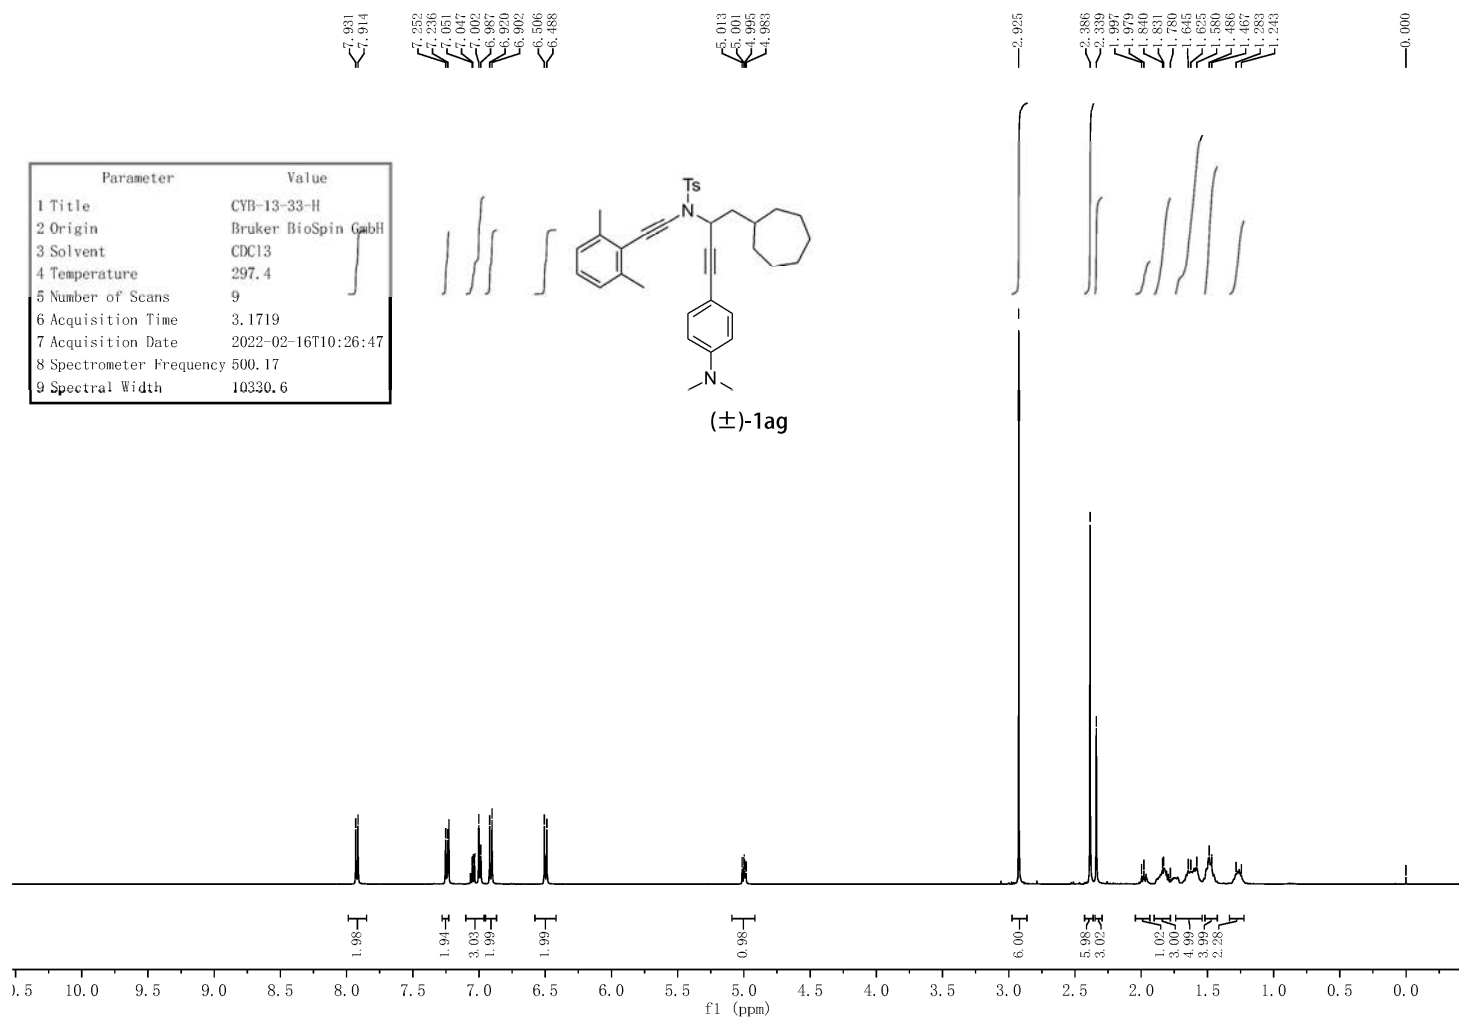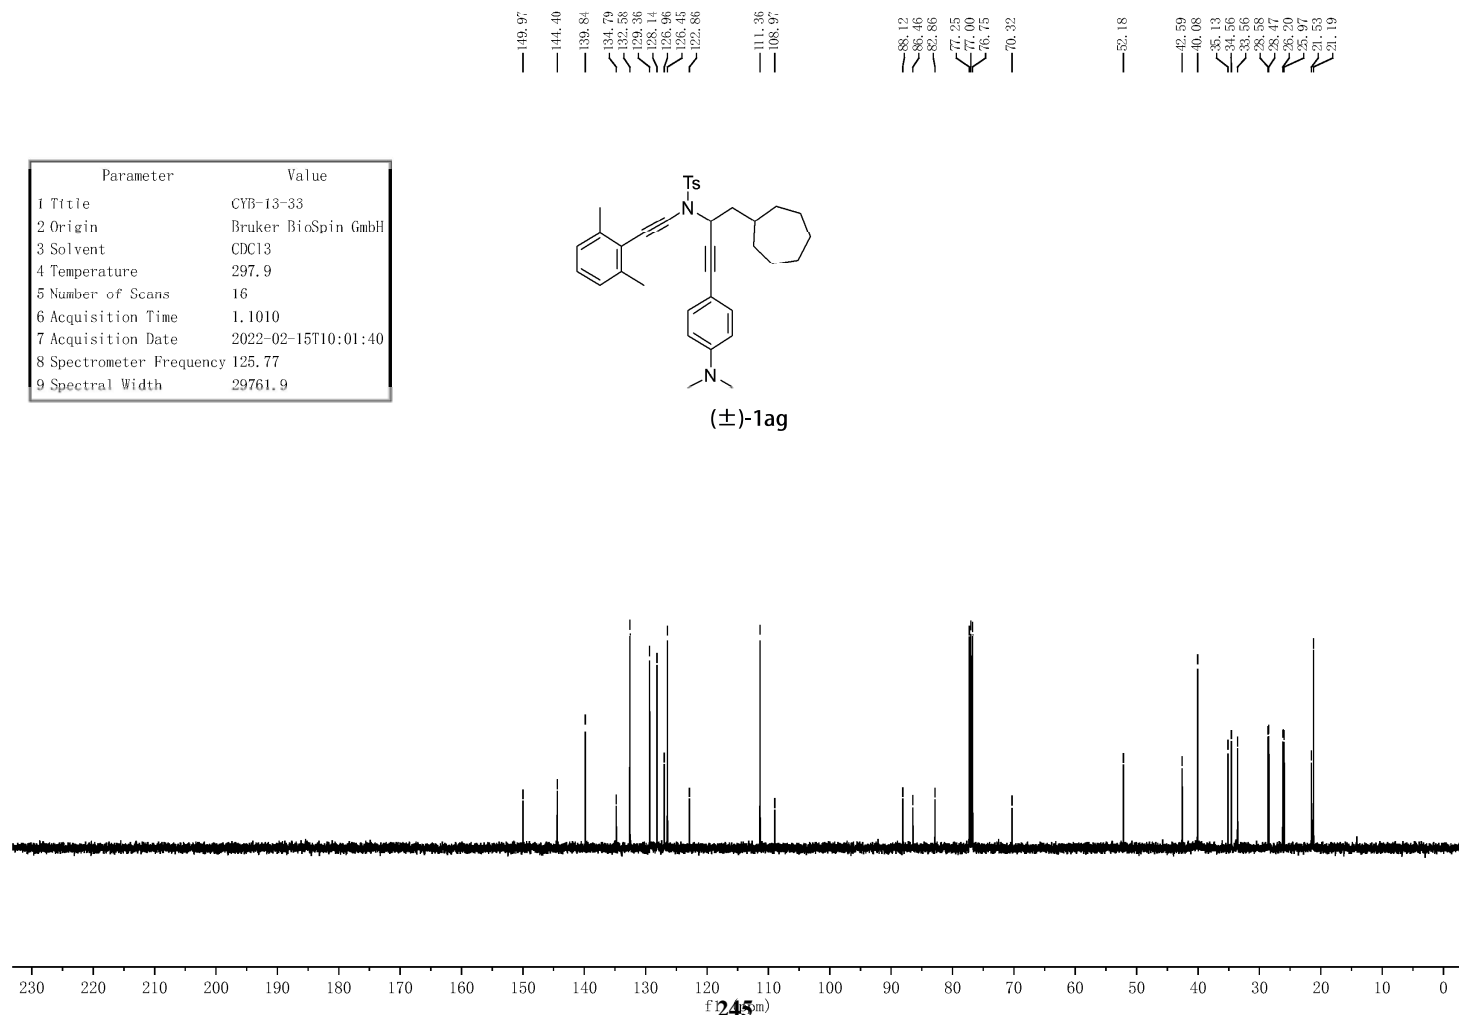

Supplementary Figure 145.  $^1\text{H}$  and  $^{13}\text{C}$  NMR spectra for (±)-1ag

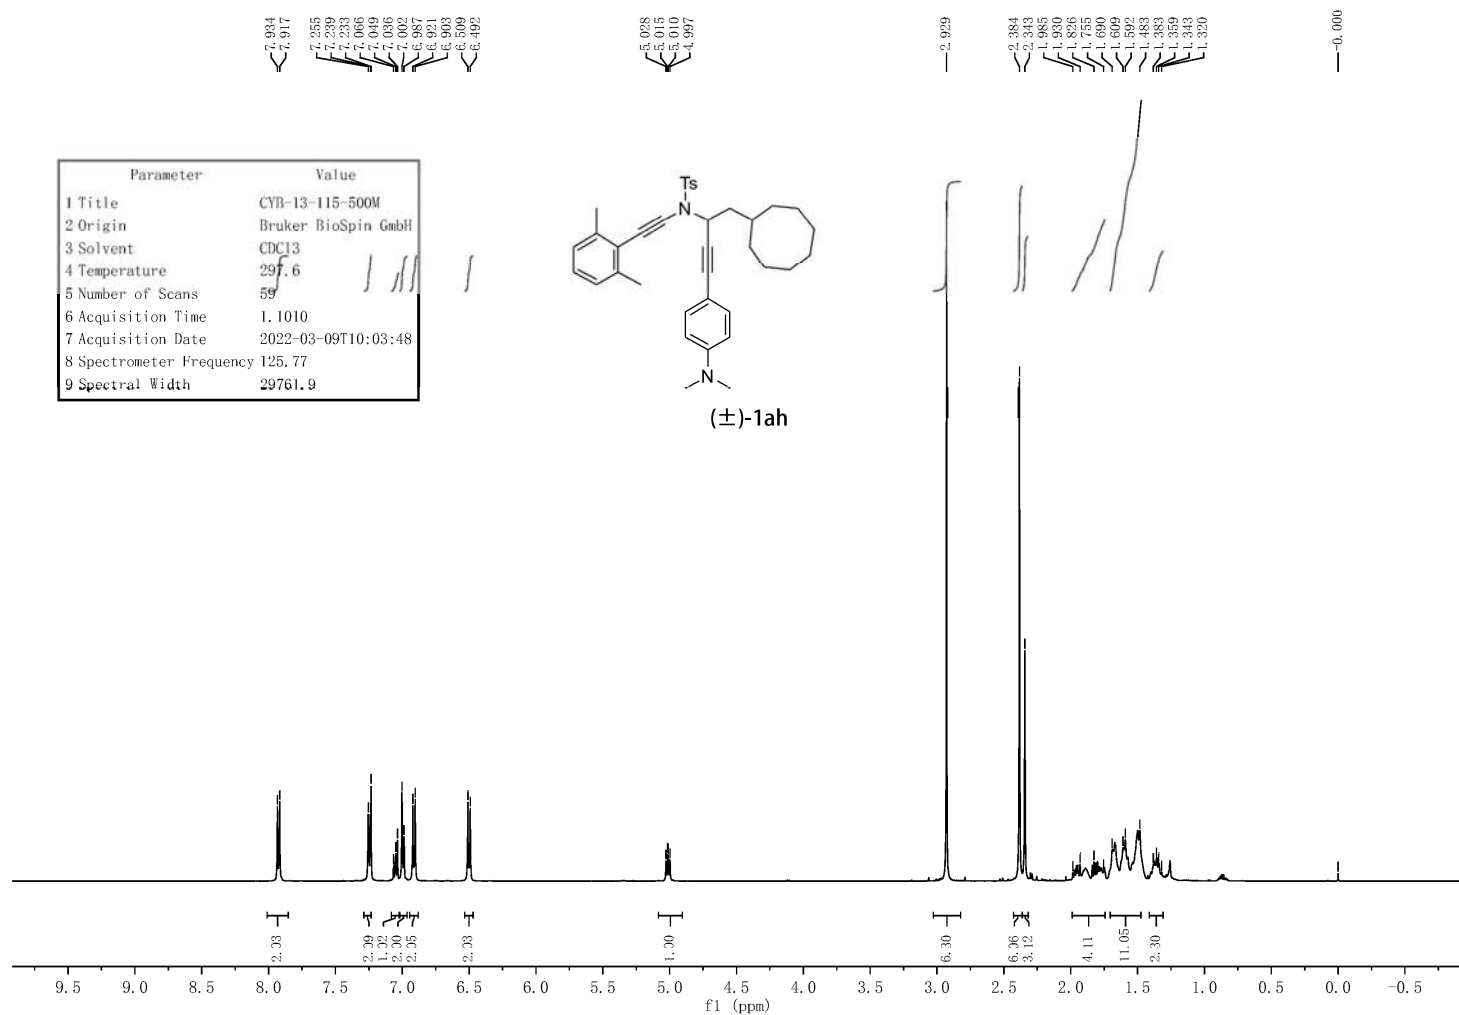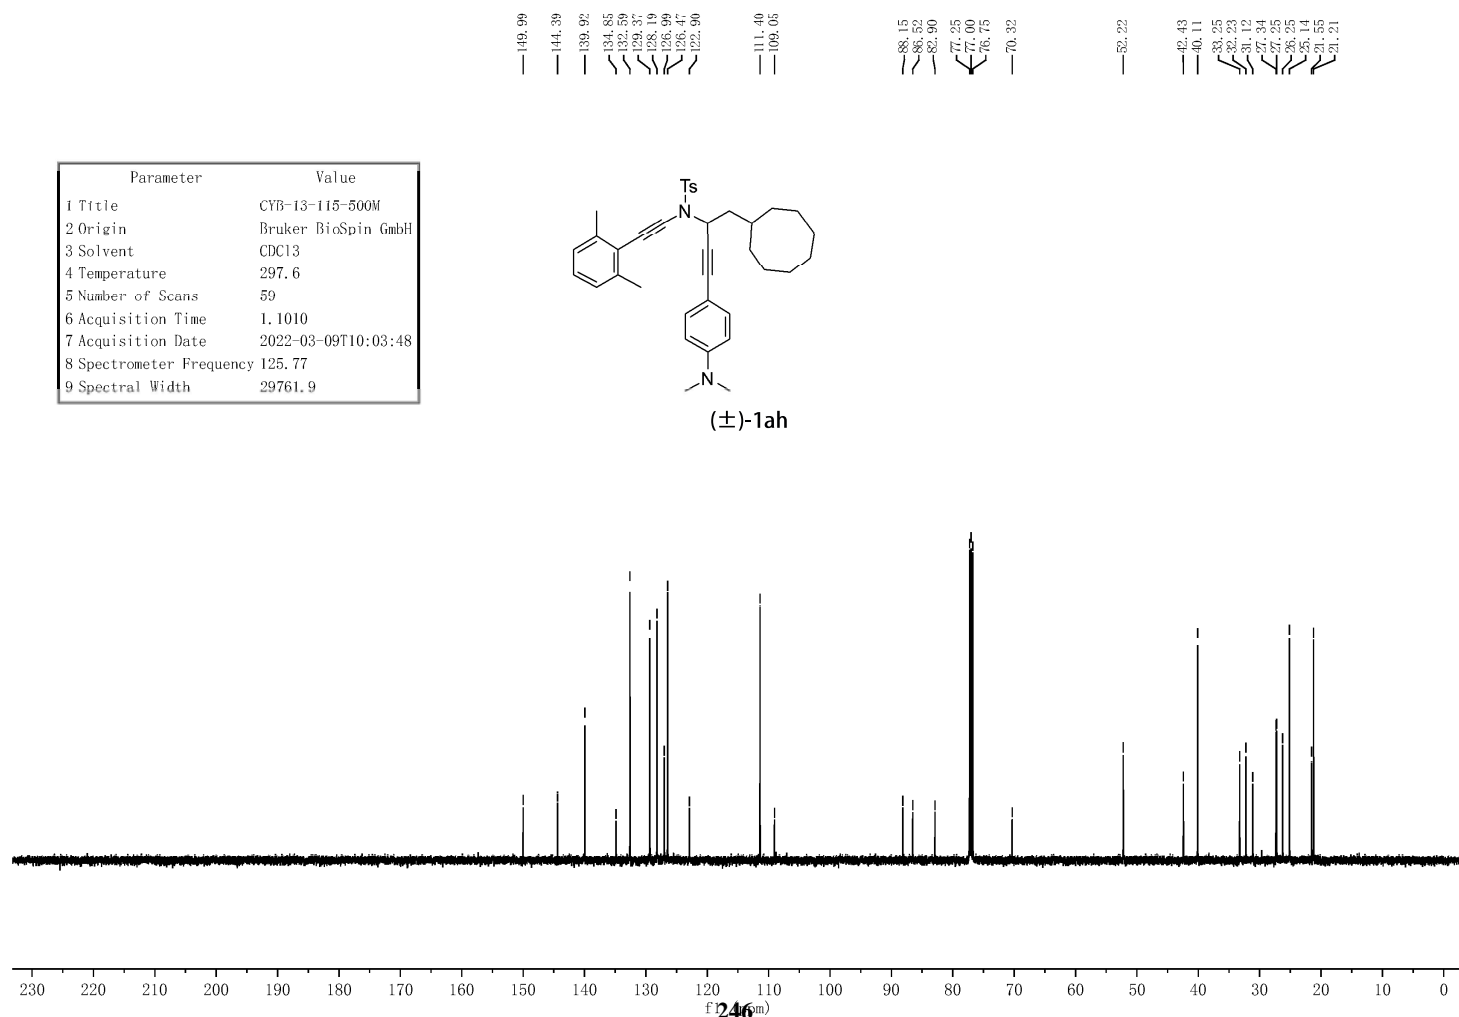

Supplementary Figure 146. <sup>1</sup>H and <sup>13</sup>C NMR spectra for (±)-1ah

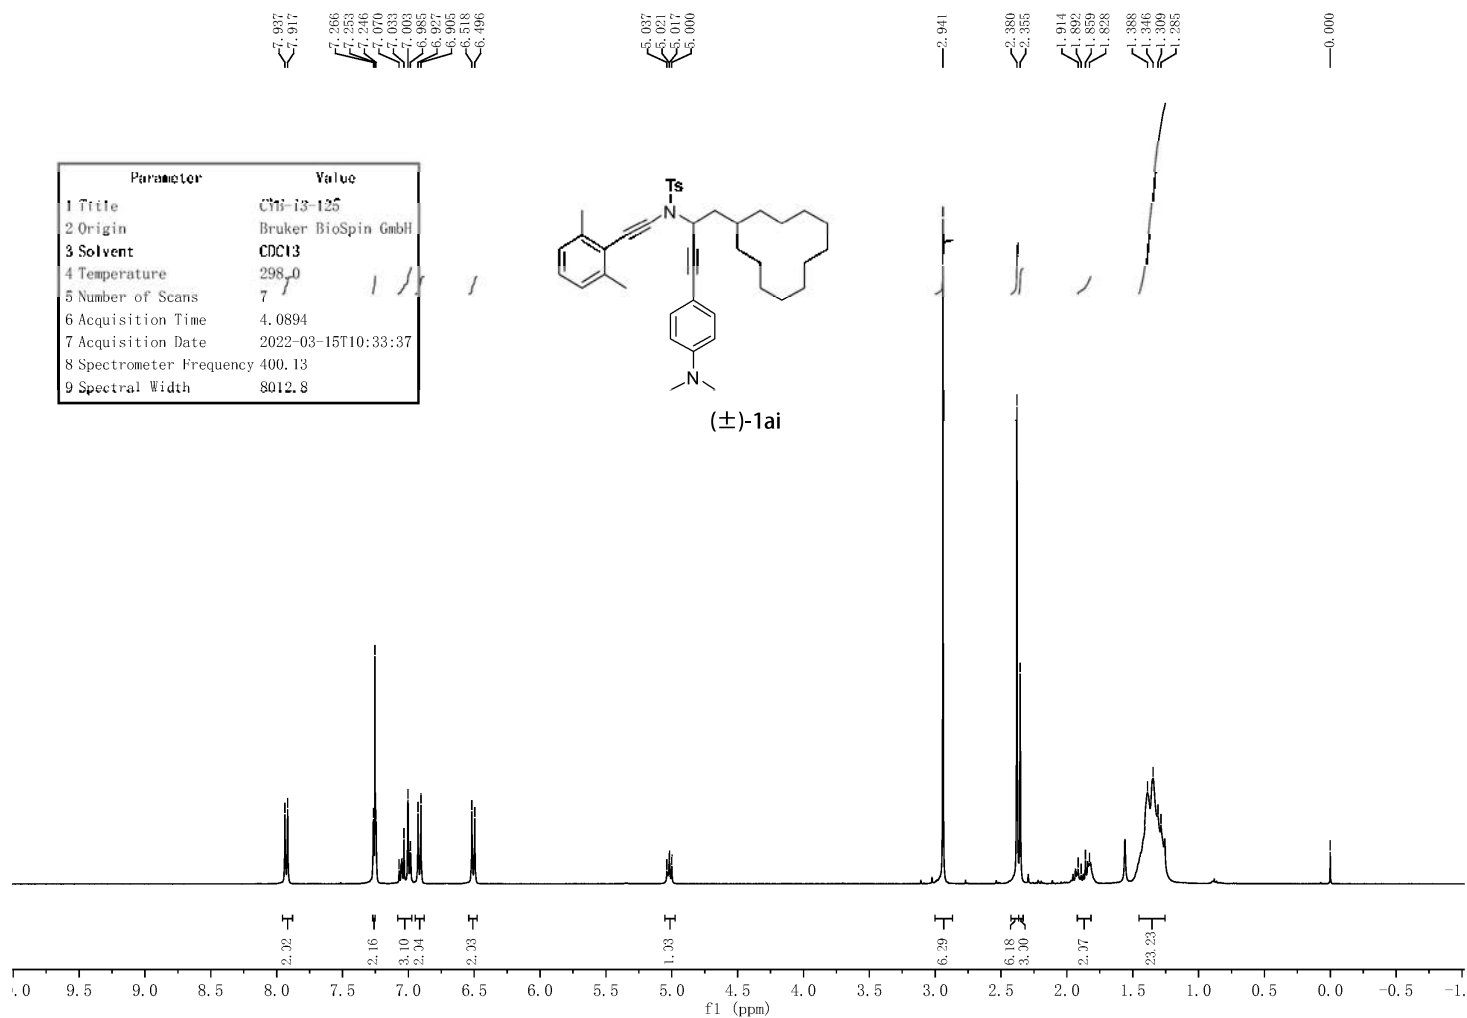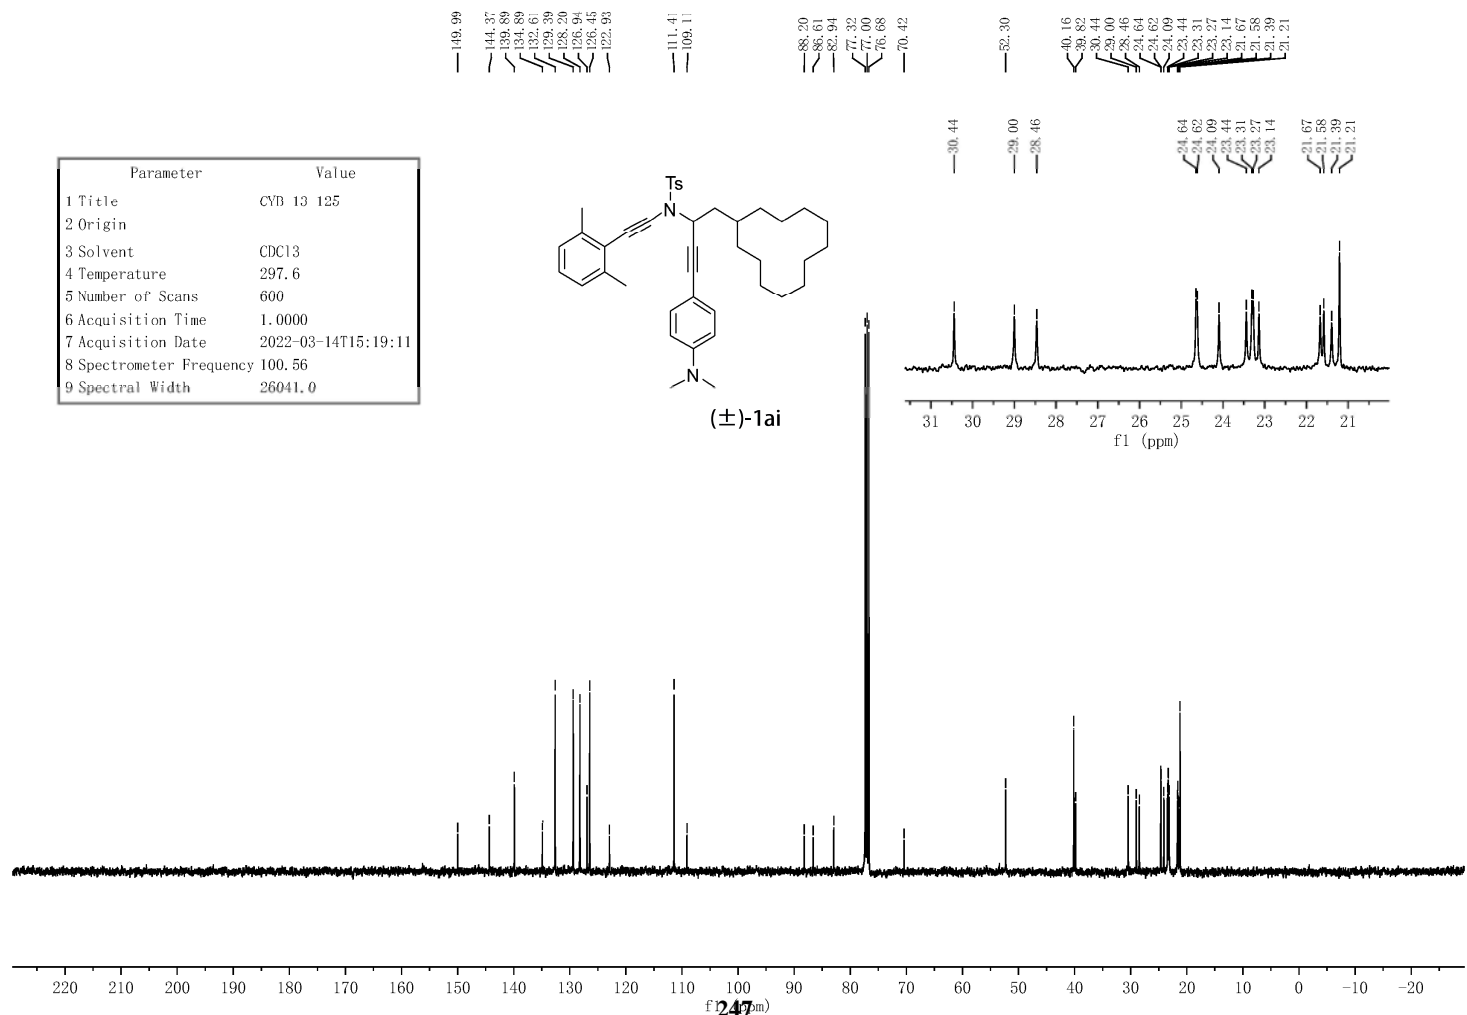

Supplementary Figure 147. <sup>1</sup>H and <sup>13</sup>C NMR spectra for (±)-1ai

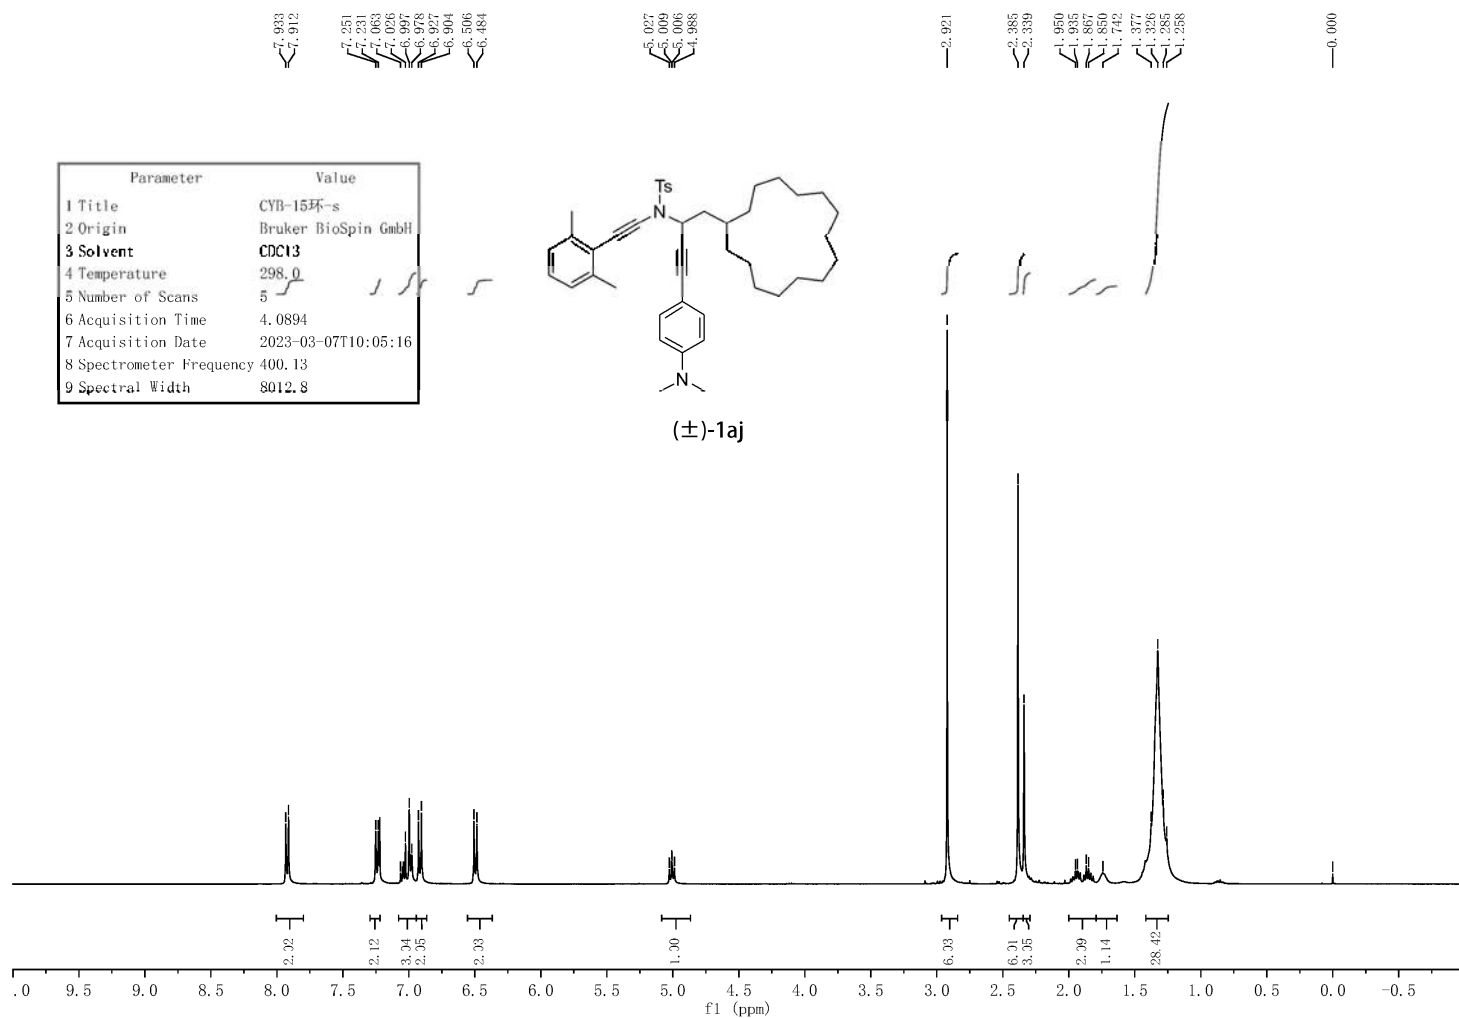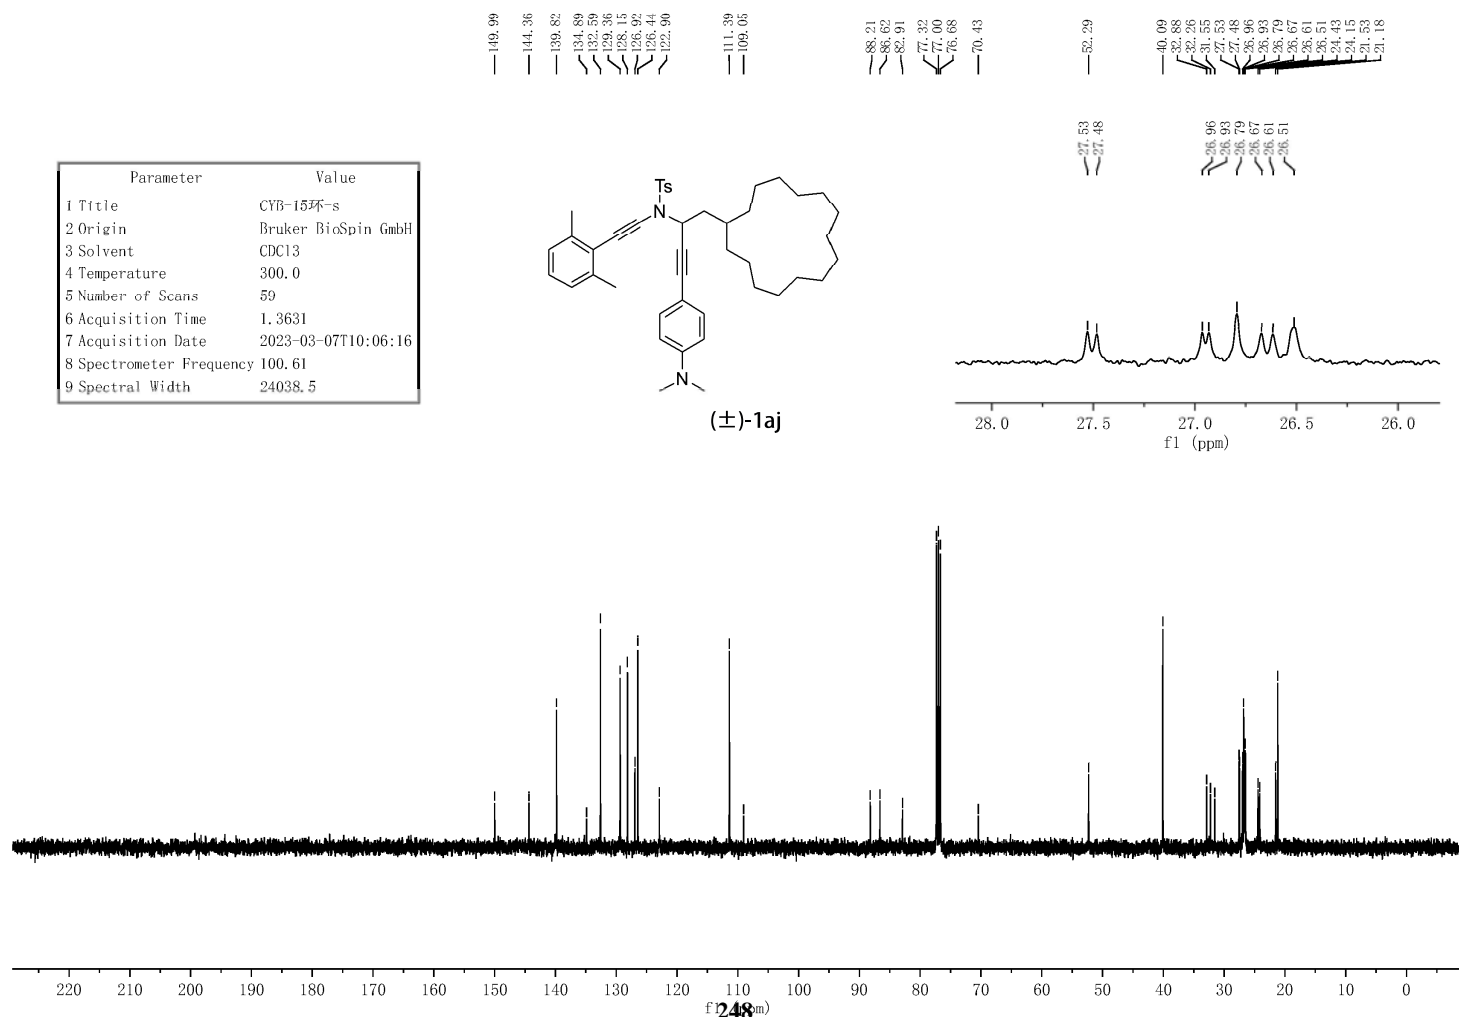

Supplementary Figure 148. <sup>1</sup>H and <sup>13</sup>C NMR spectra for (±)-1aj



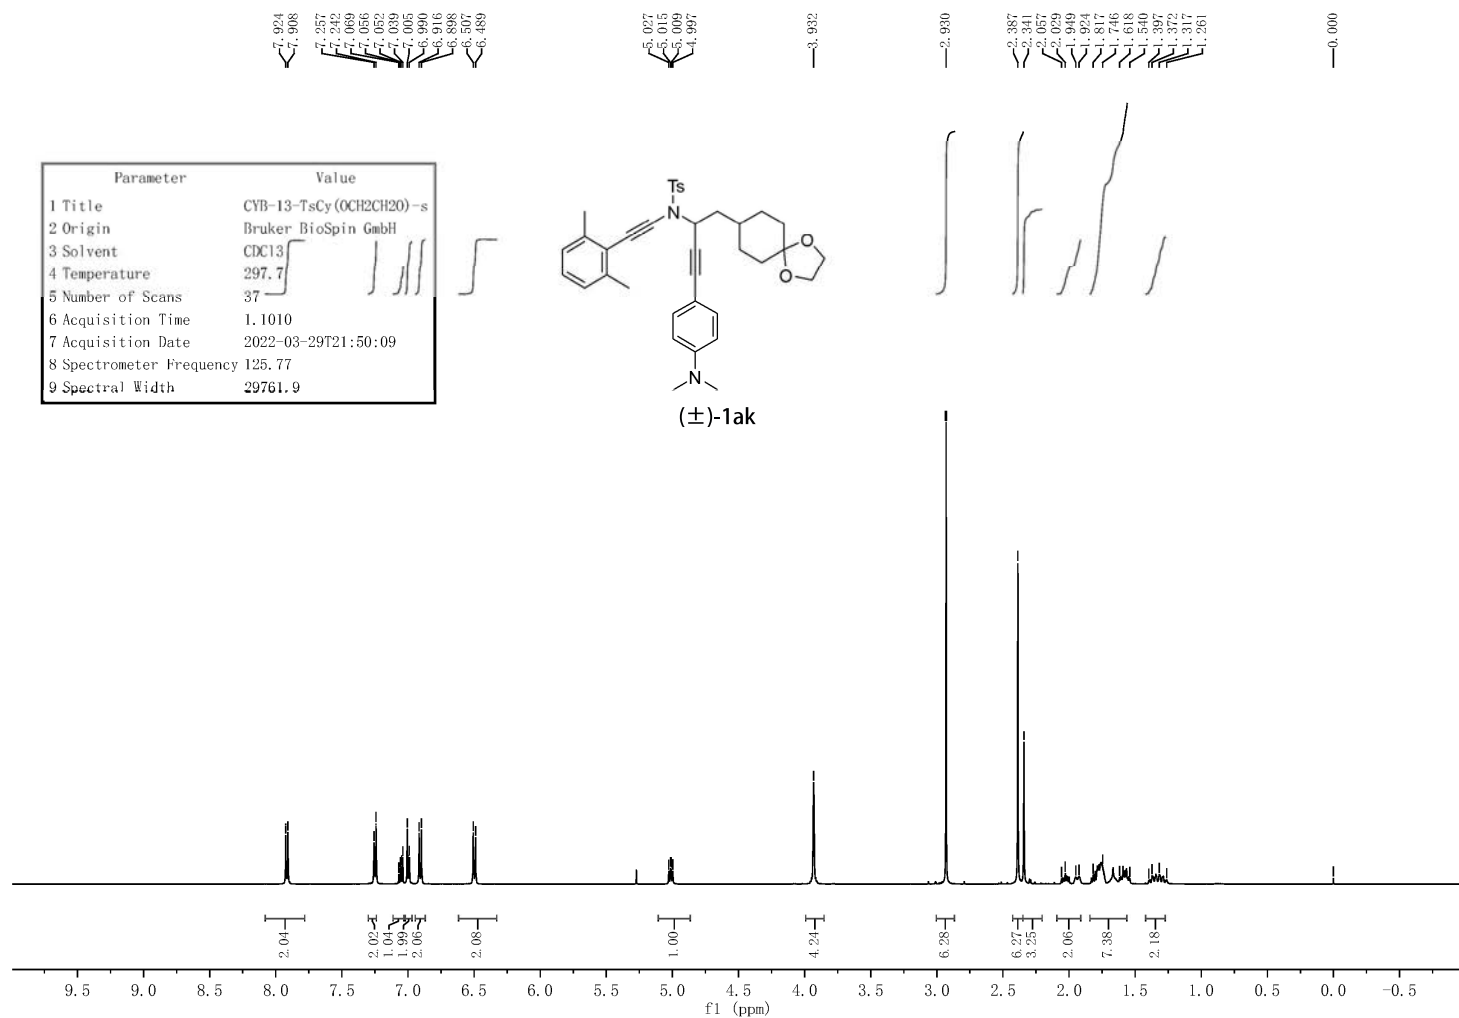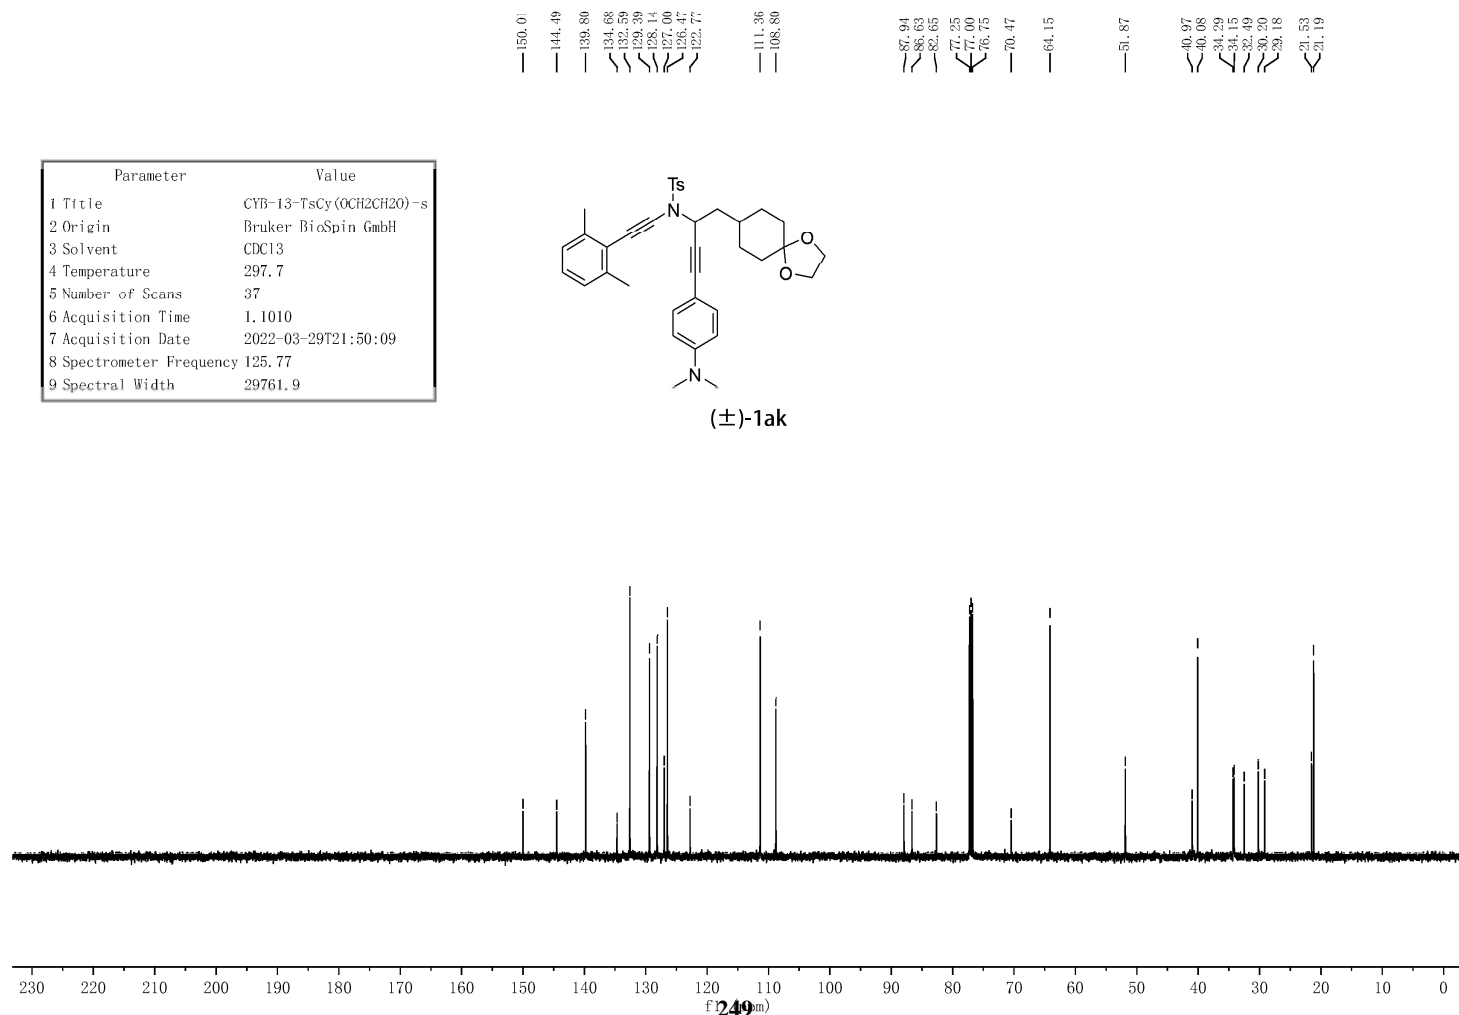

Supplementary Figure 149. <sup>1</sup>H and <sup>13</sup>C NMR spectra for (±)-1ak

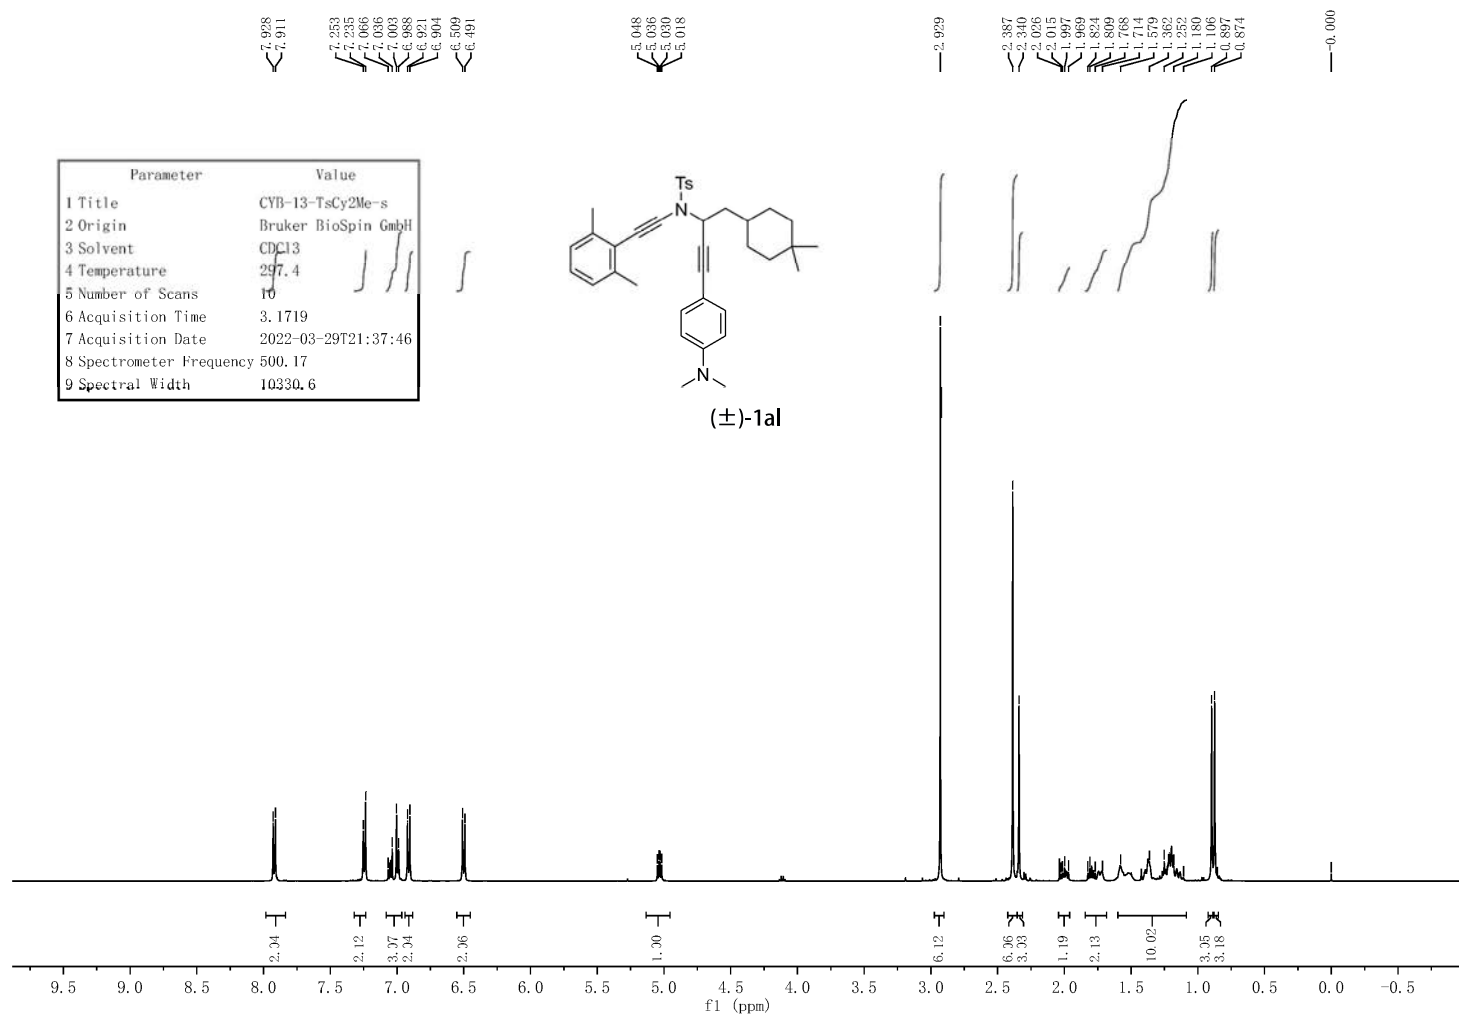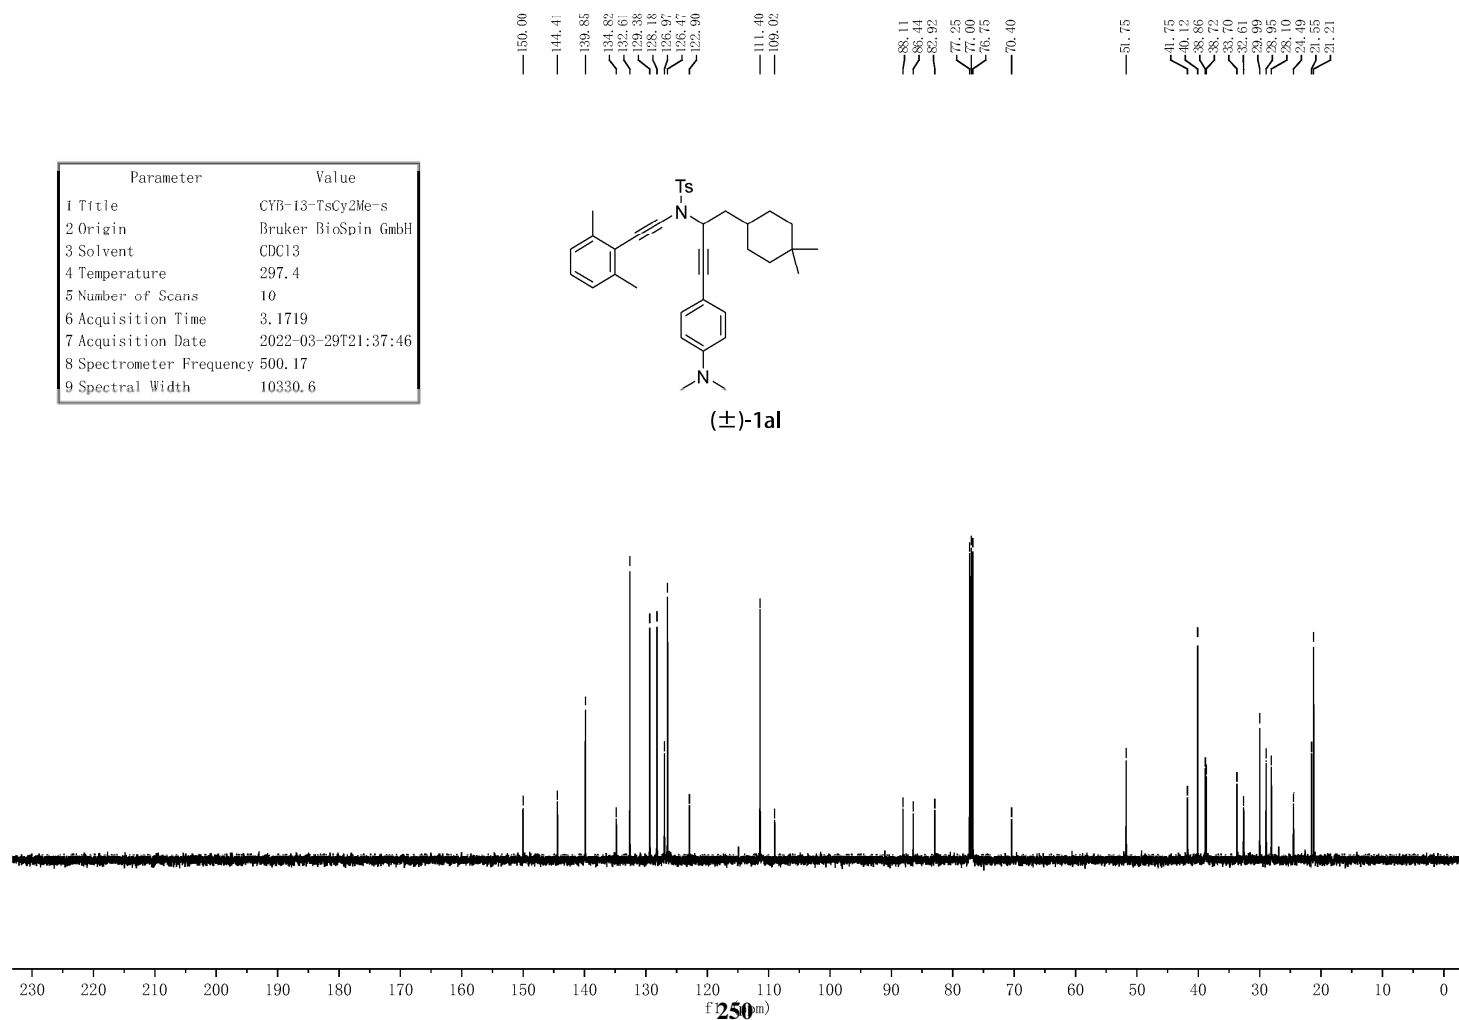

Supplementary Figure 150. <sup>1</sup>H and <sup>13</sup>C NMR spectra for (±)-1al

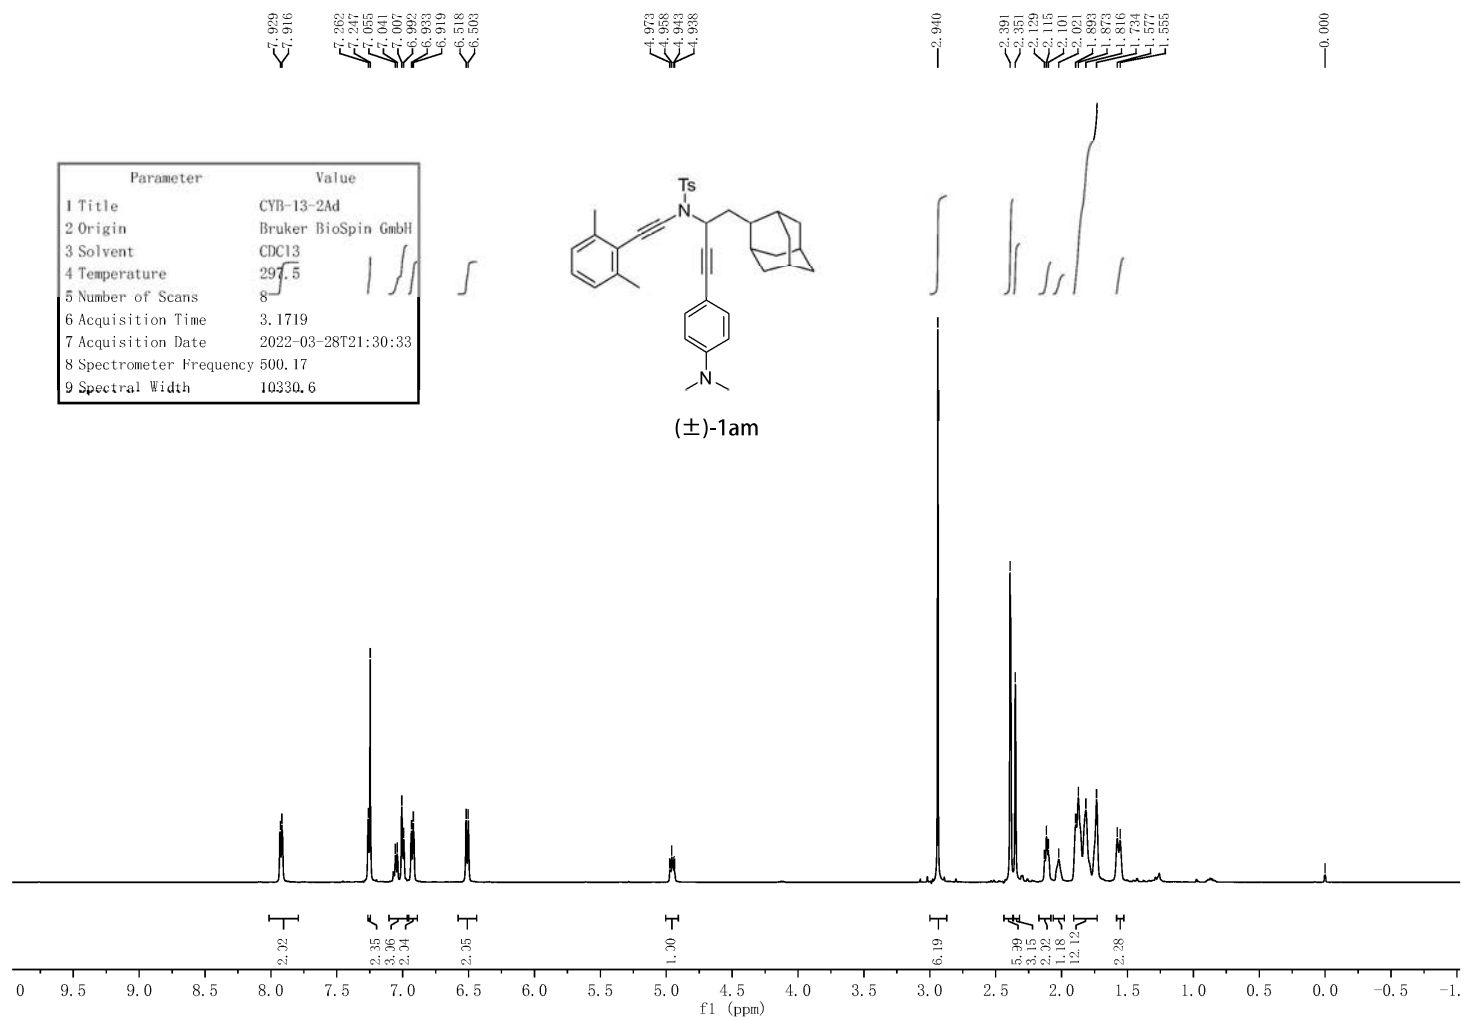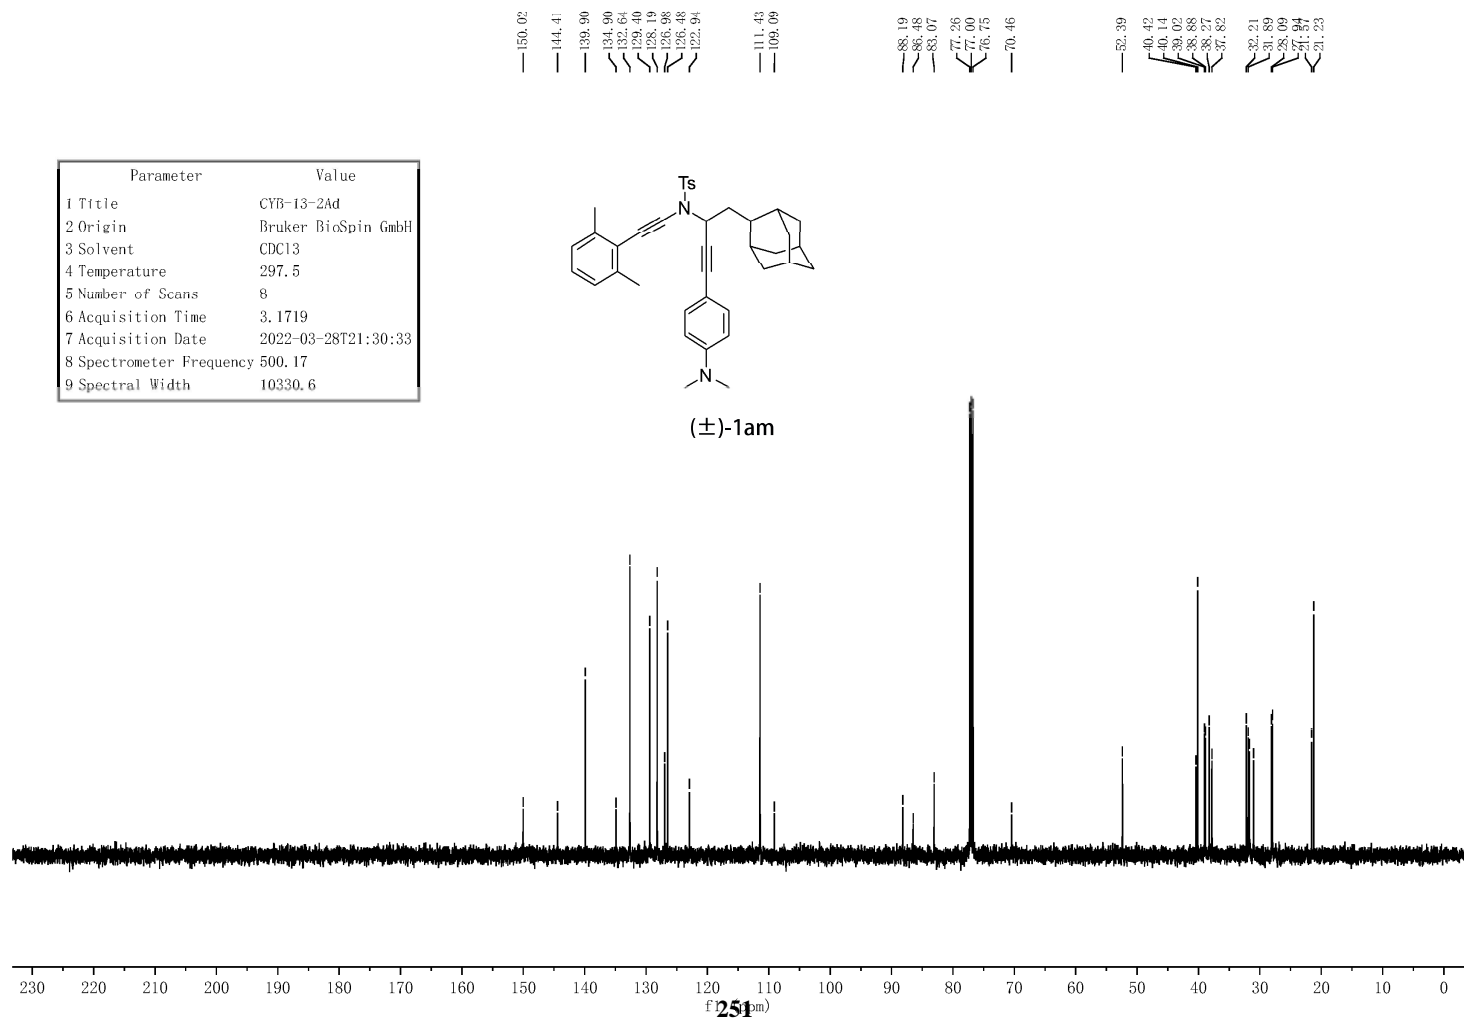

Supplementary Figure 151. <sup>1</sup>H and <sup>13</sup>C NMR spectra for (±)-1am

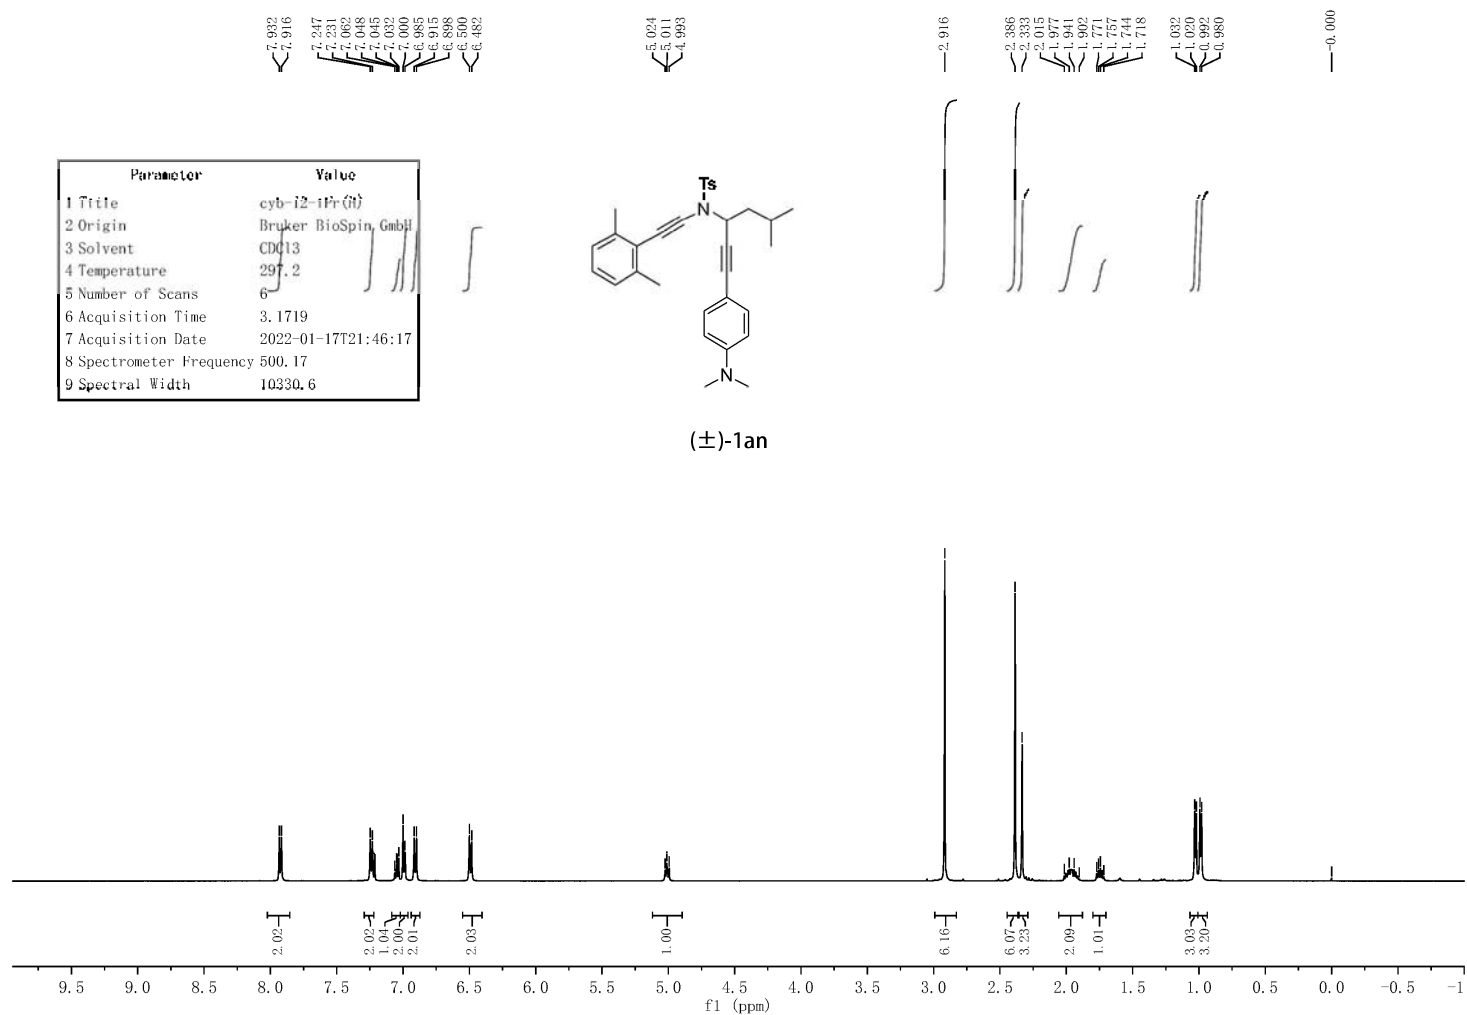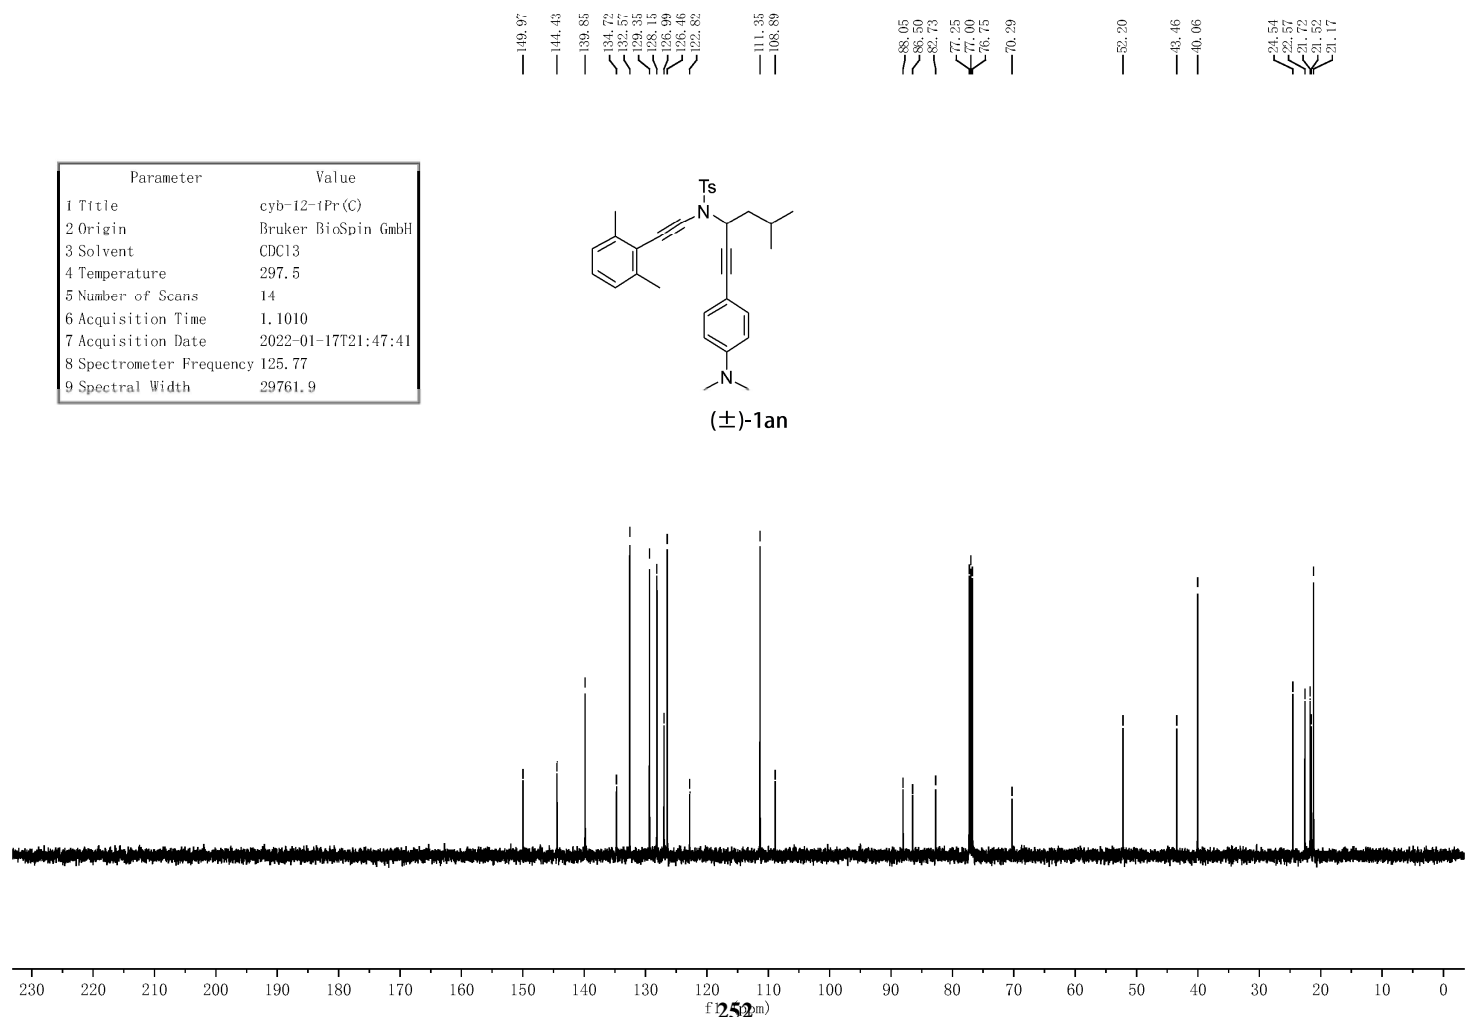

Supplementary Figure 152.  $^1\text{H}$  and  $^{13}\text{C}$  NMR spectra for (±)-1an

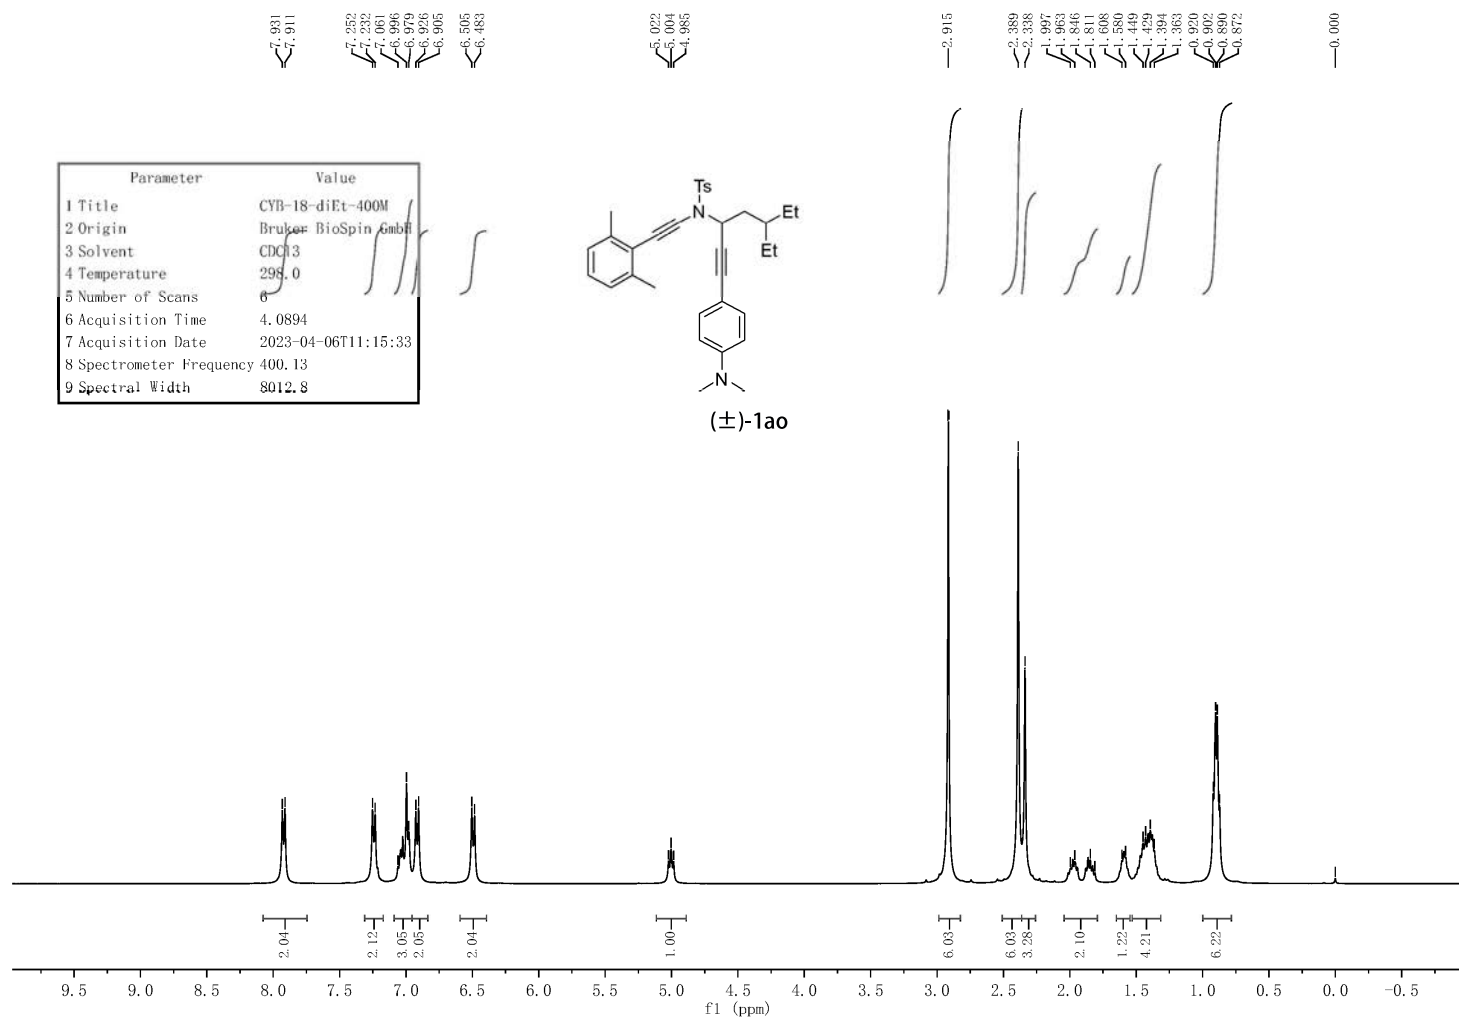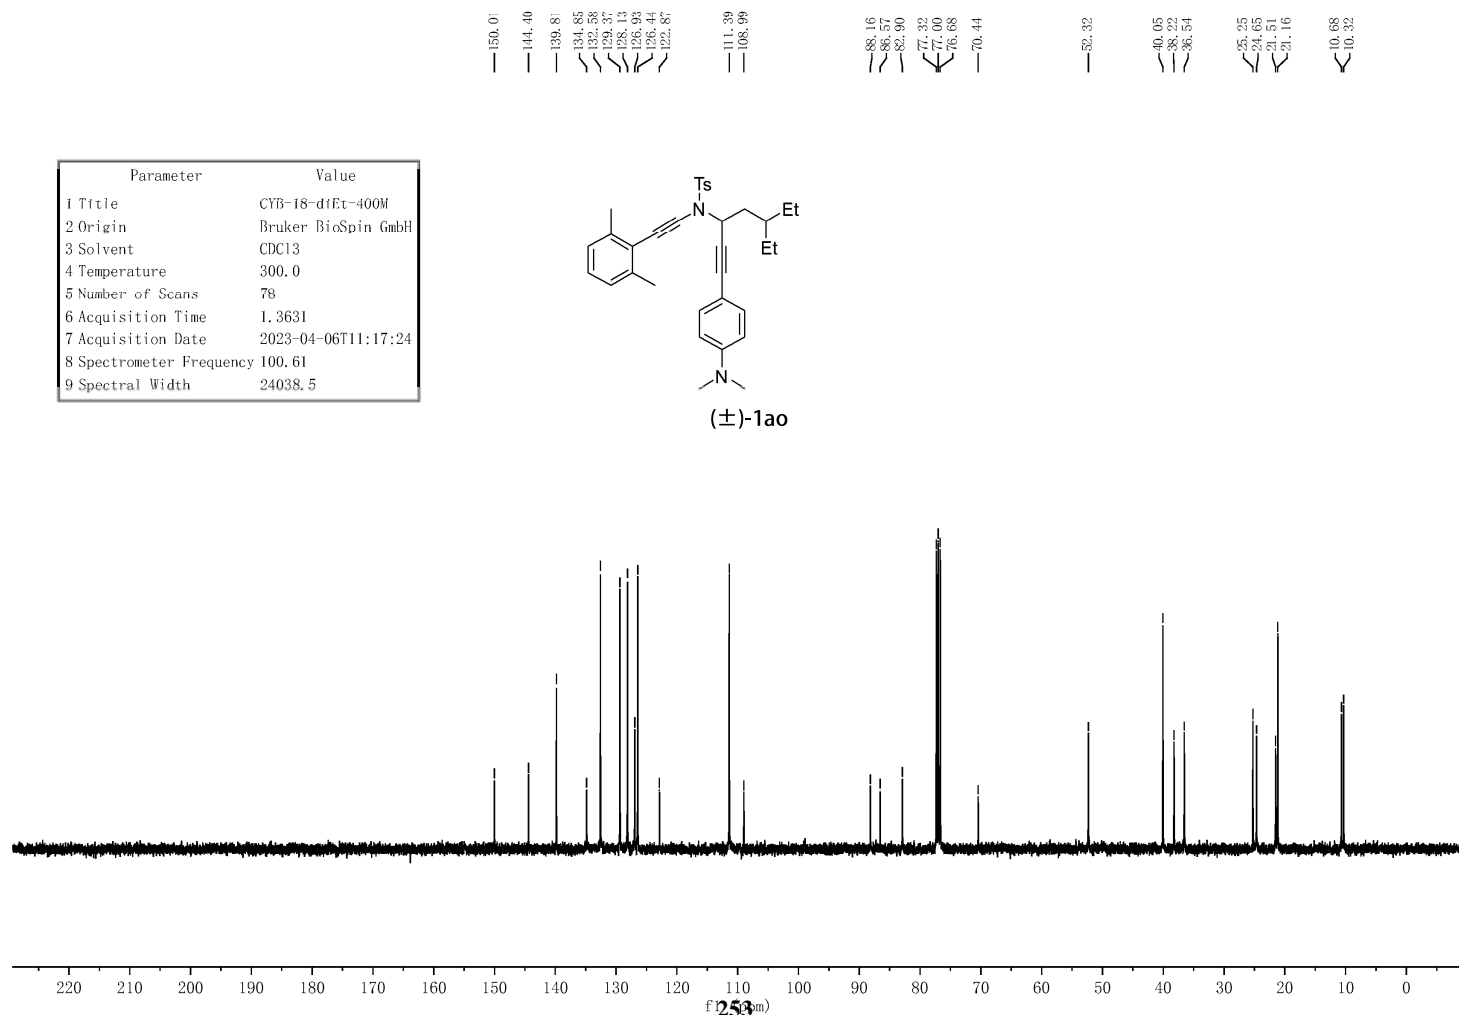

Supplementary Figure 153. <sup>1</sup>H and <sup>13</sup>C NMR spectra for (±)-1ao

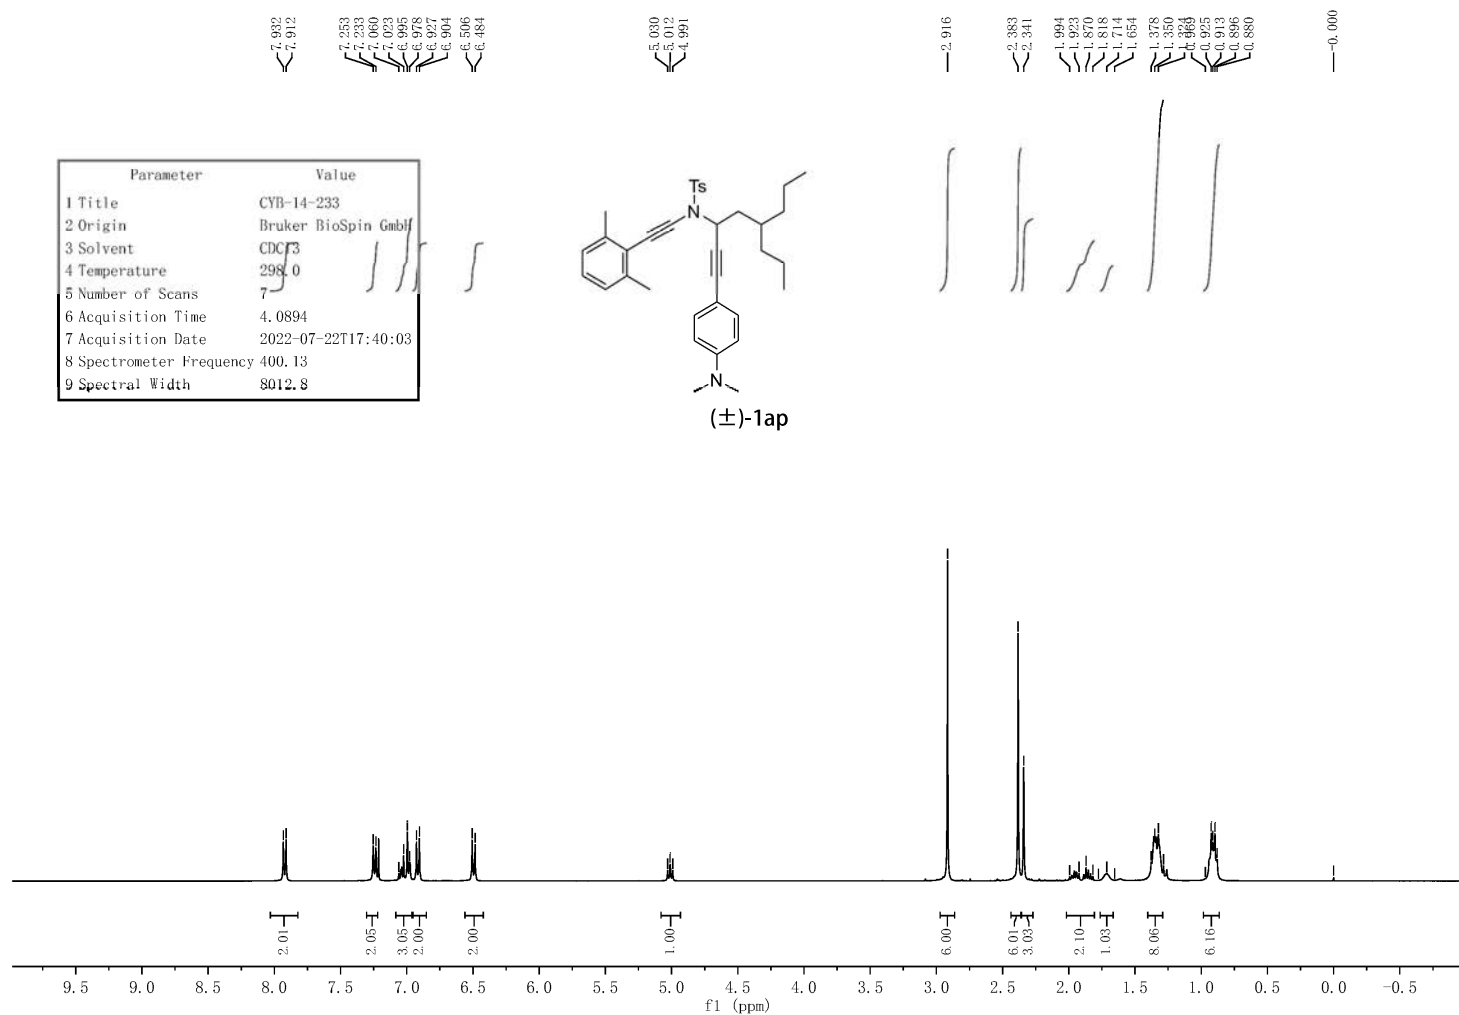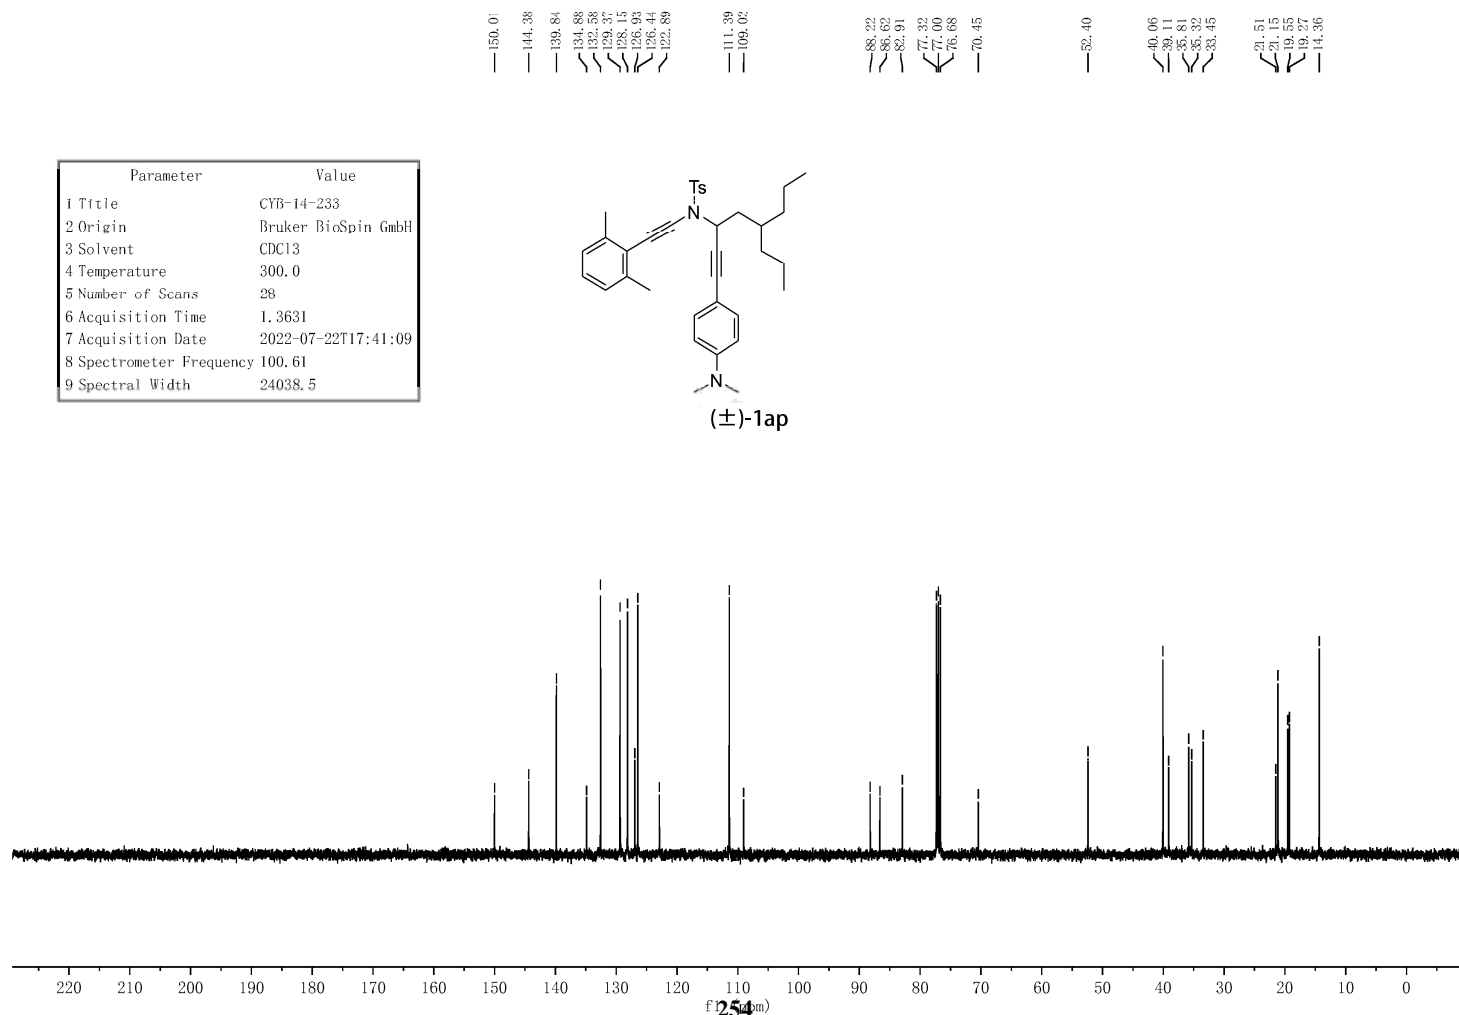

Supplementary Figure 154. <sup>1</sup>H and <sup>13</sup>C NMR spectra for (±)-1ap

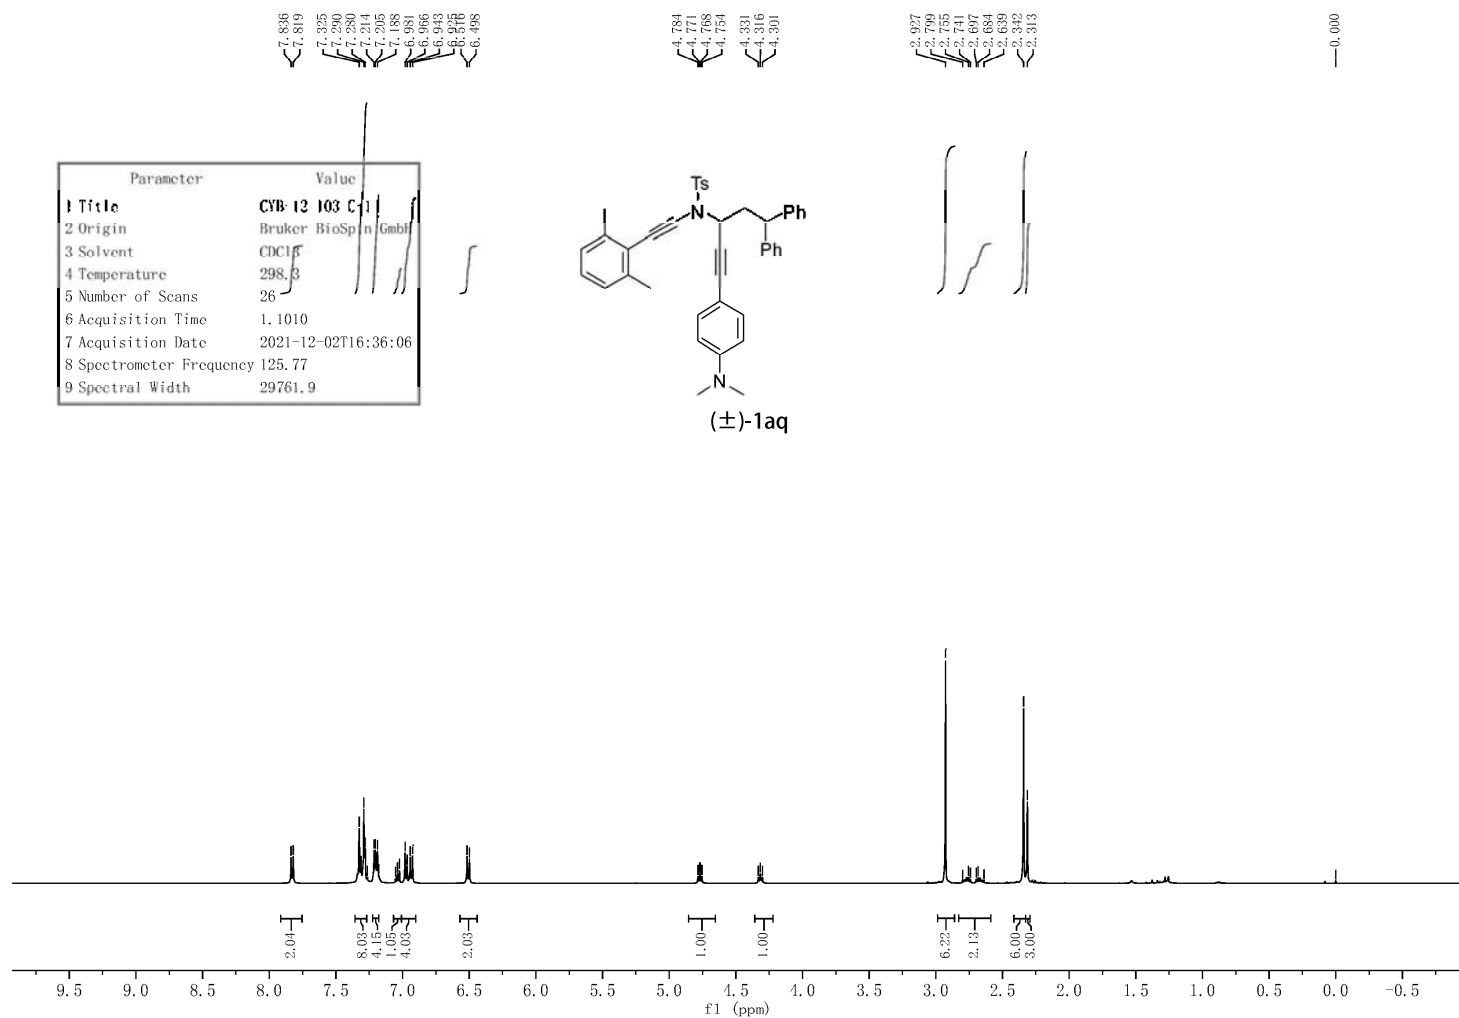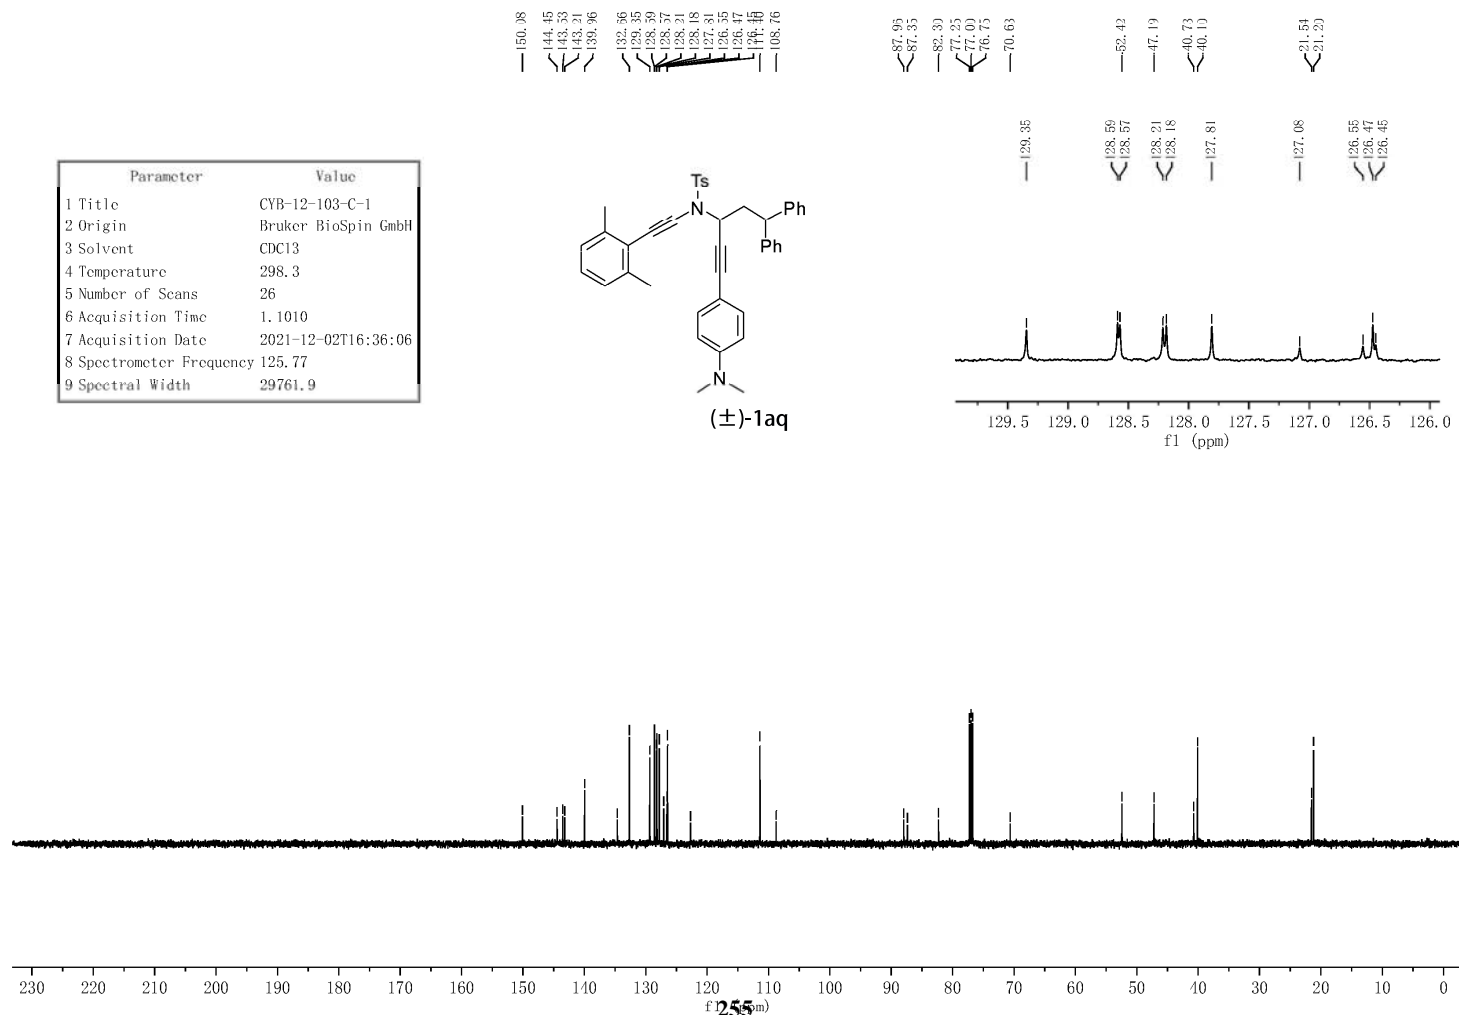

Supplementary Figure 155. <sup>1</sup>H and <sup>13</sup>C NMR spectra for (±)-1aq

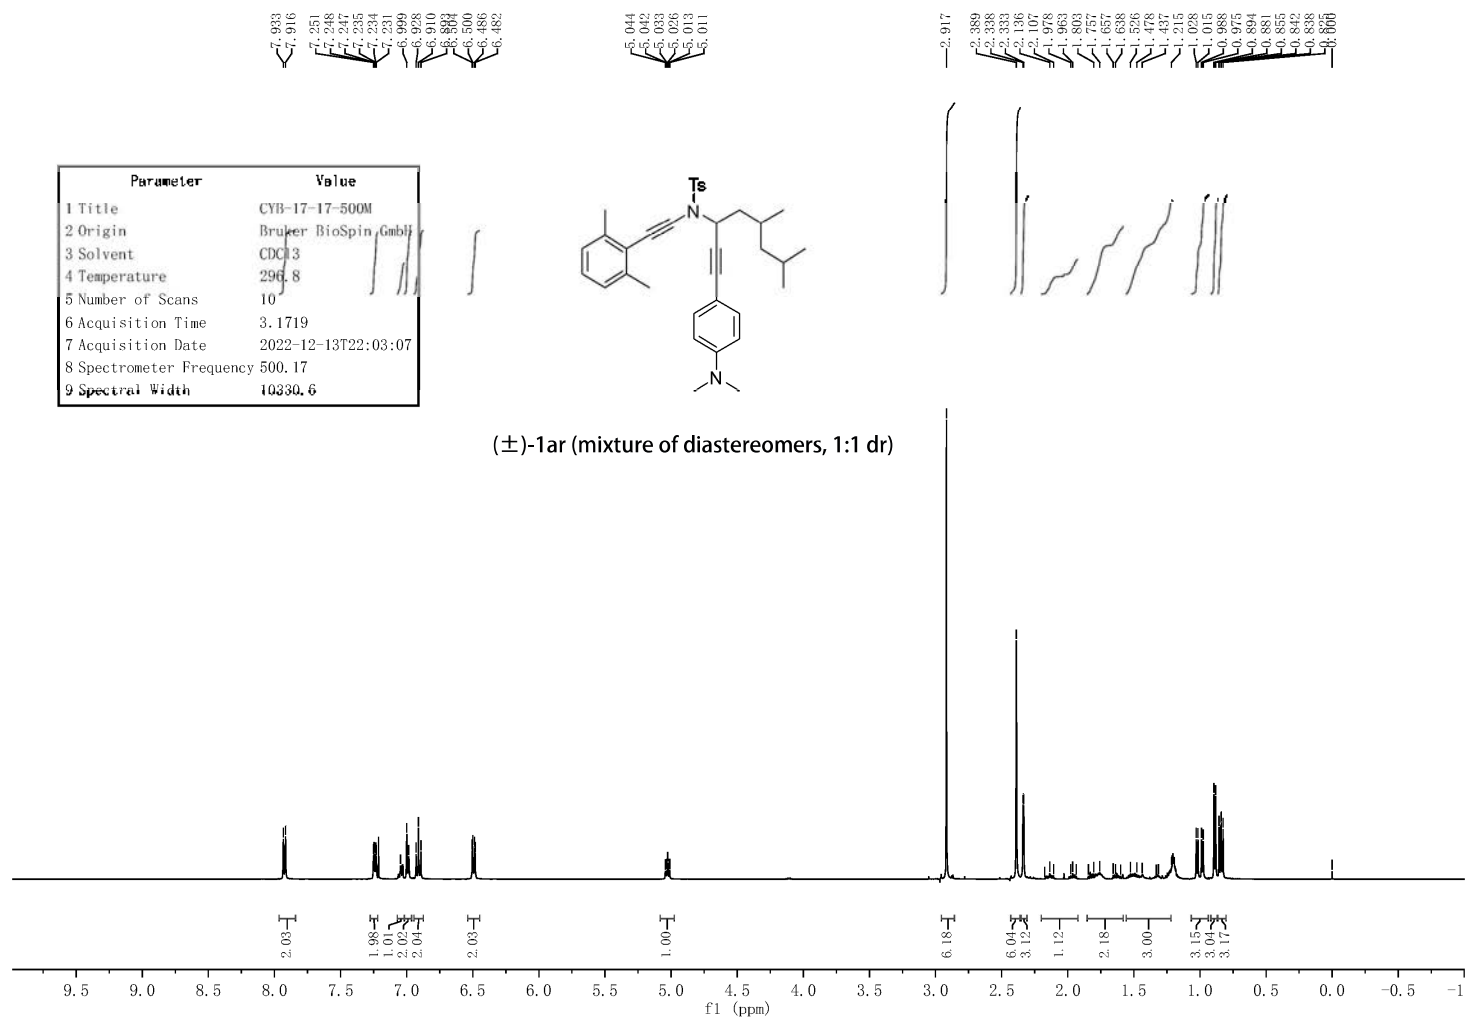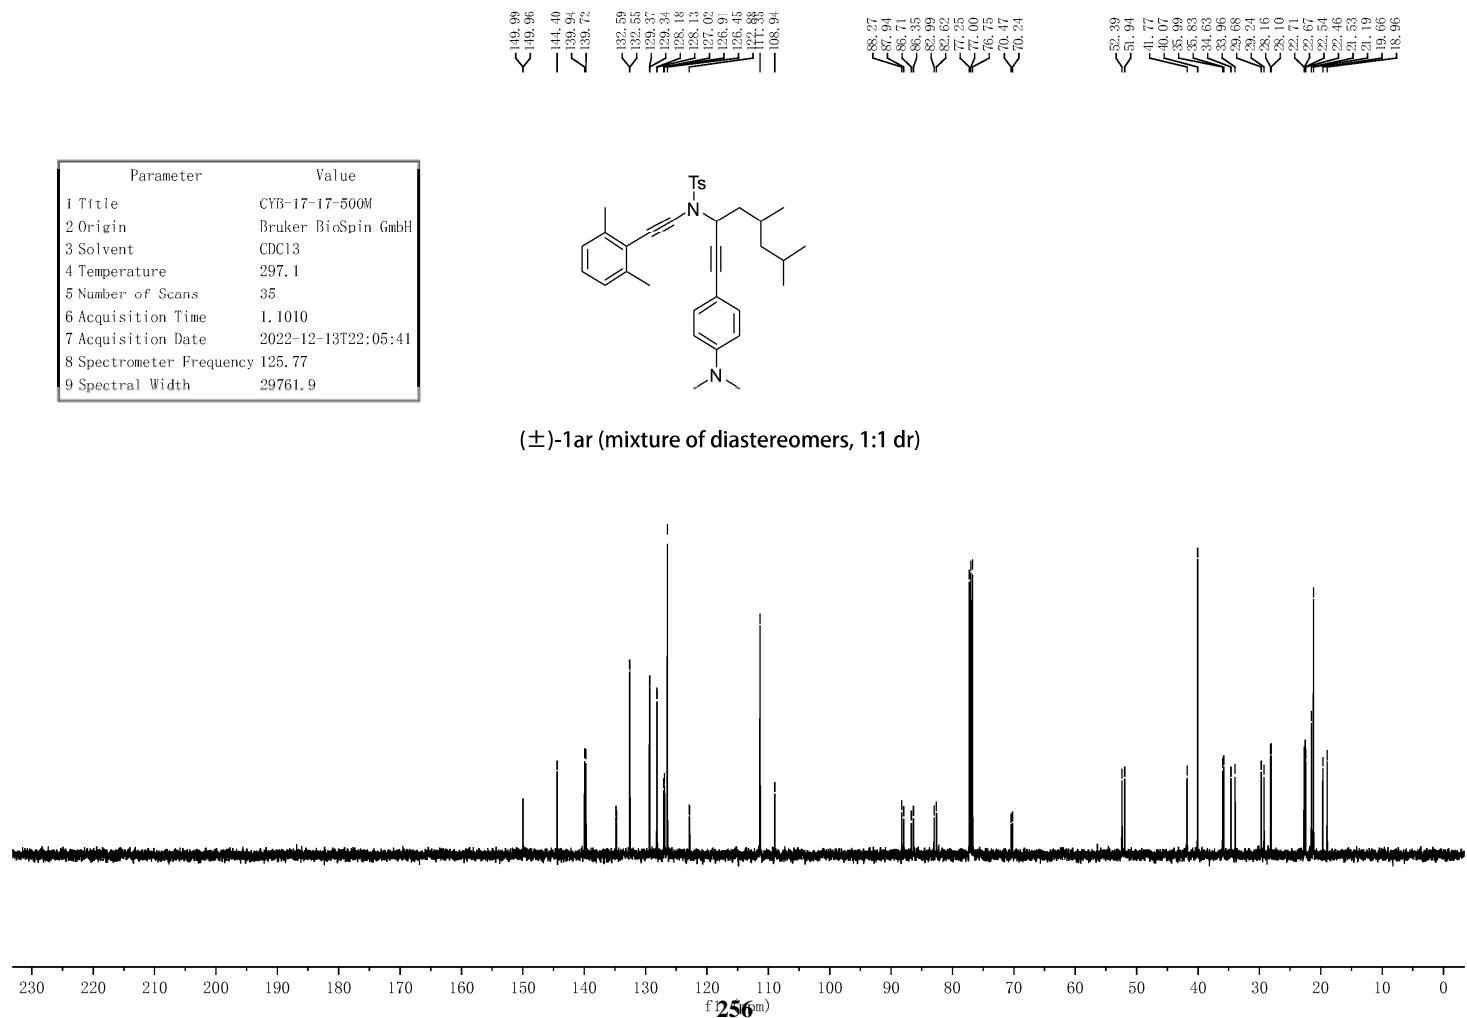

Supplementary Figure 156. <sup>1</sup>H and <sup>13</sup>C NMR spectra for (±)-1ar



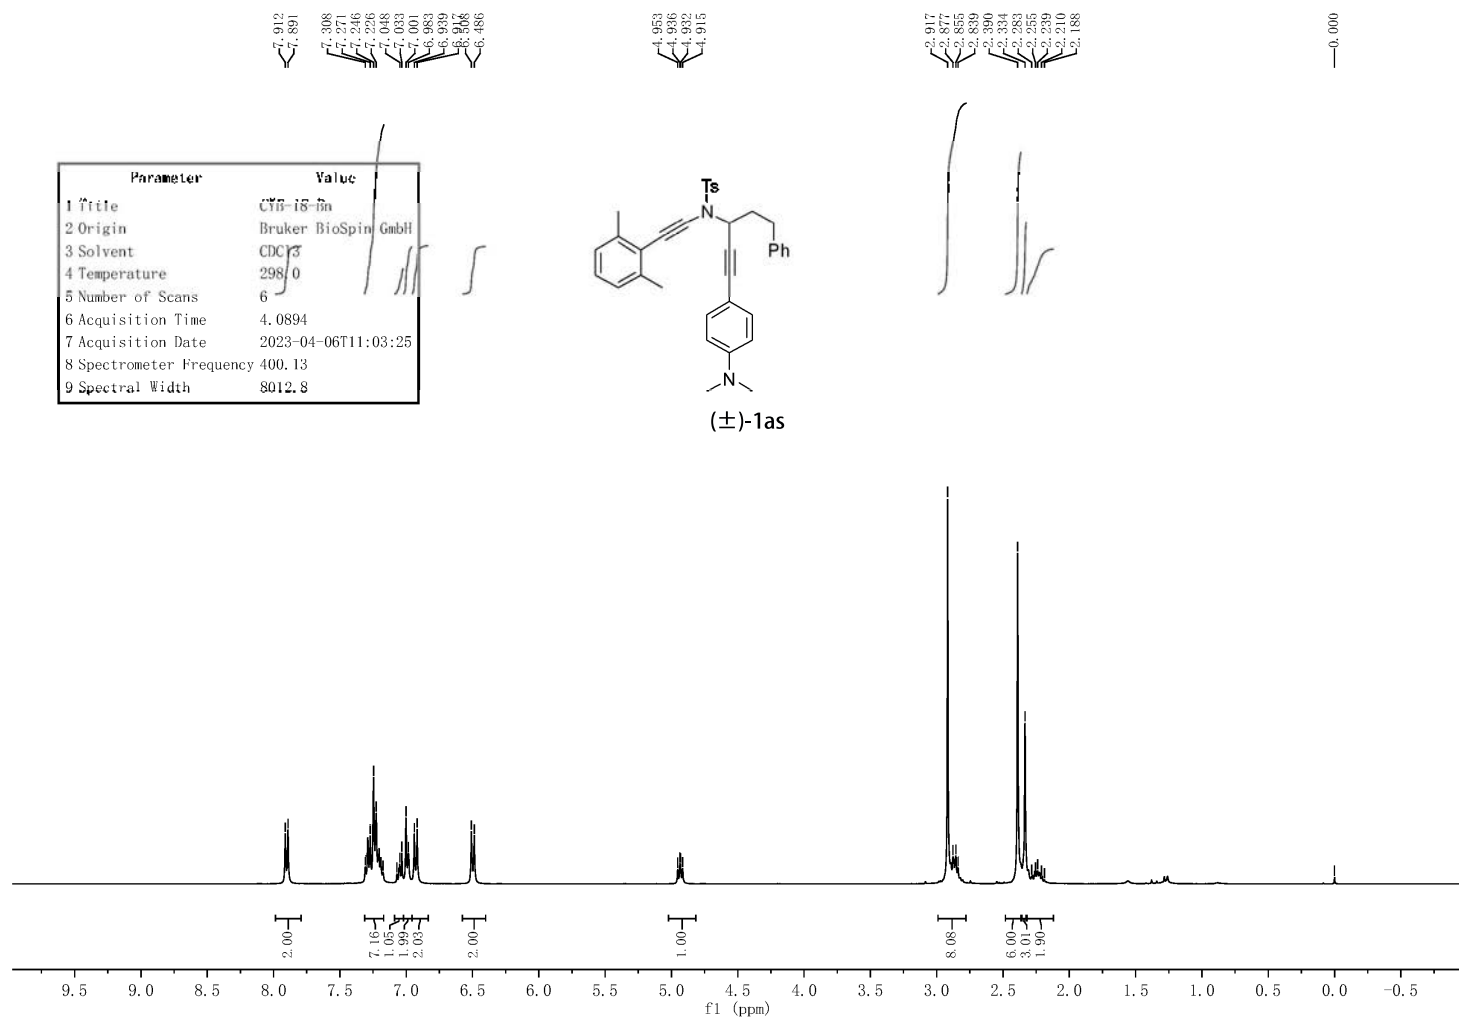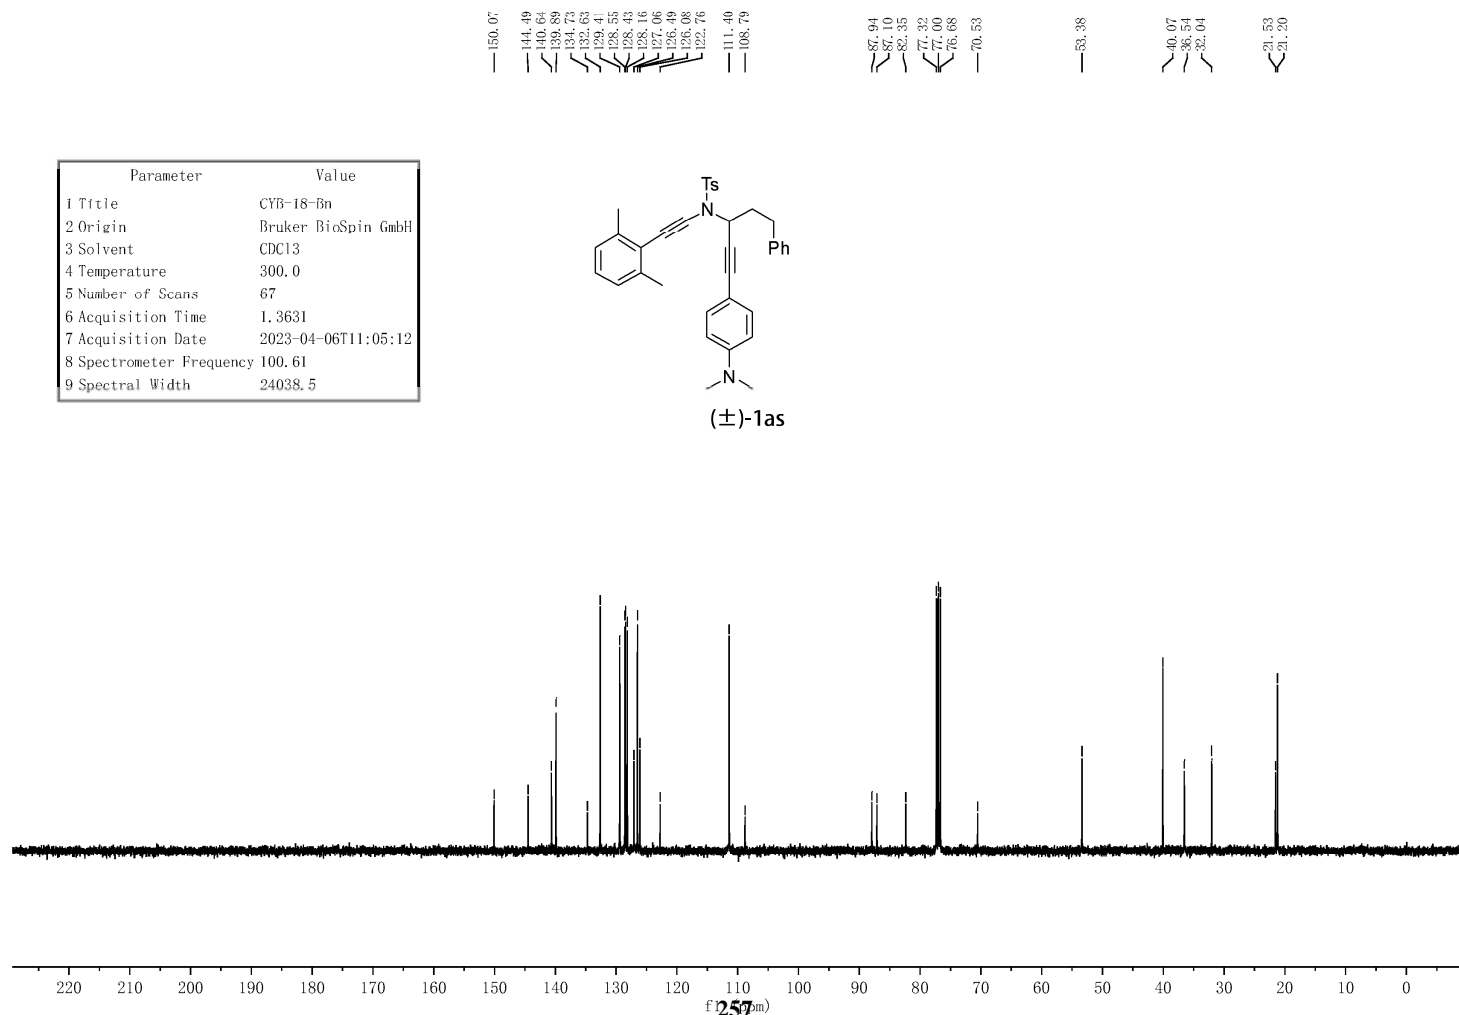

Supplementary Figure 157. <sup>1</sup>H and <sup>13</sup>C NMR spectra for (±)-1as

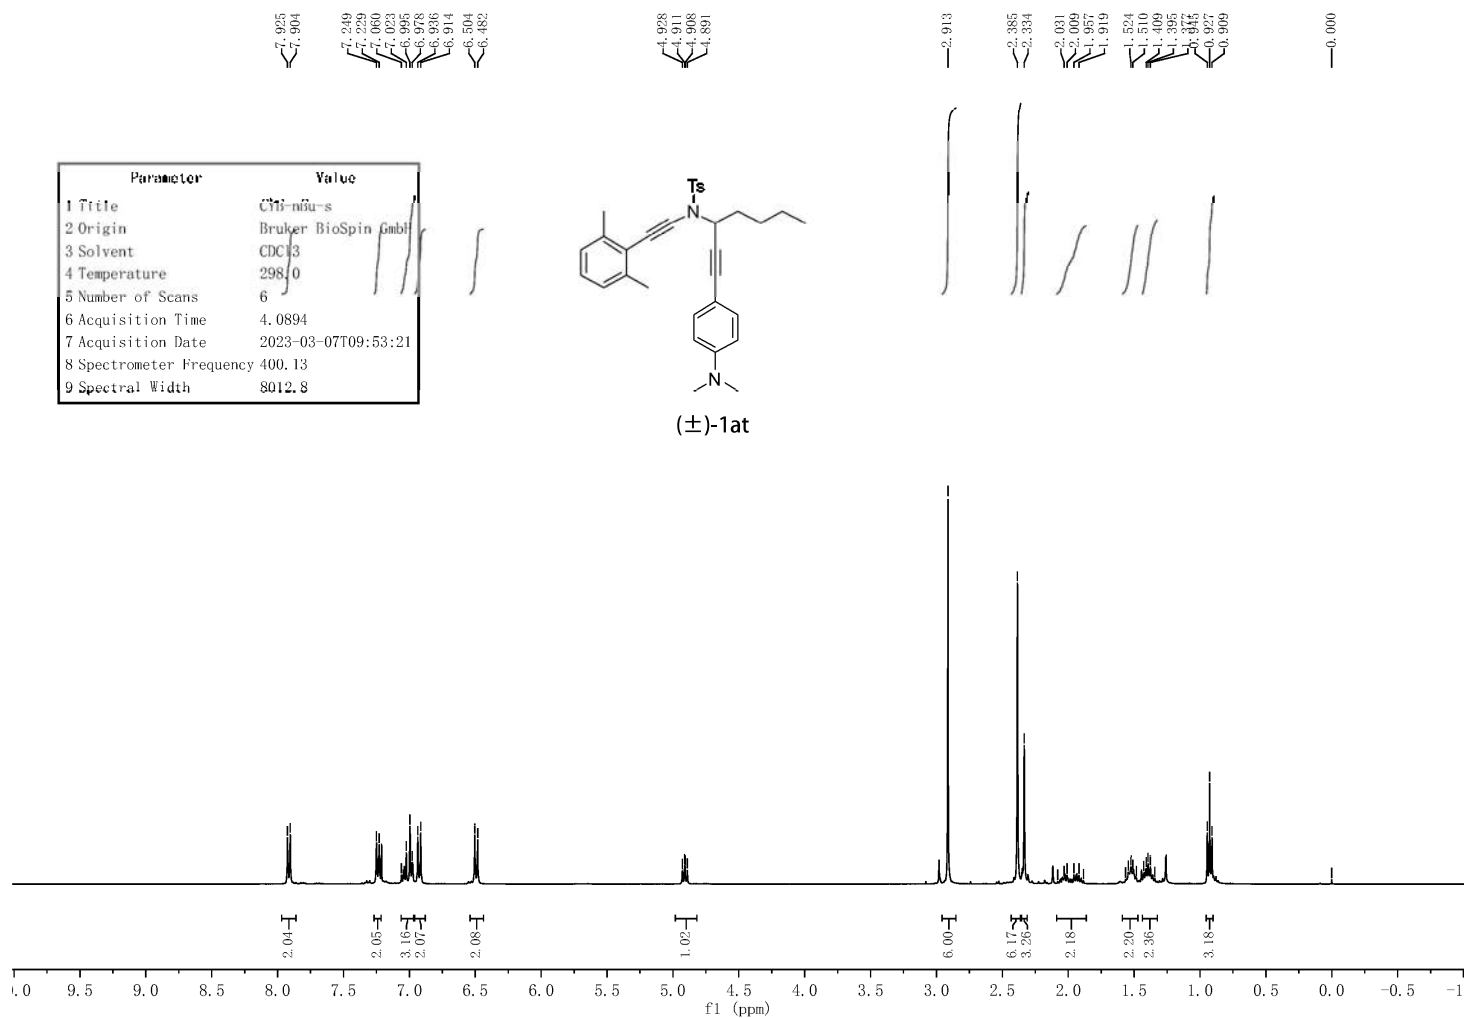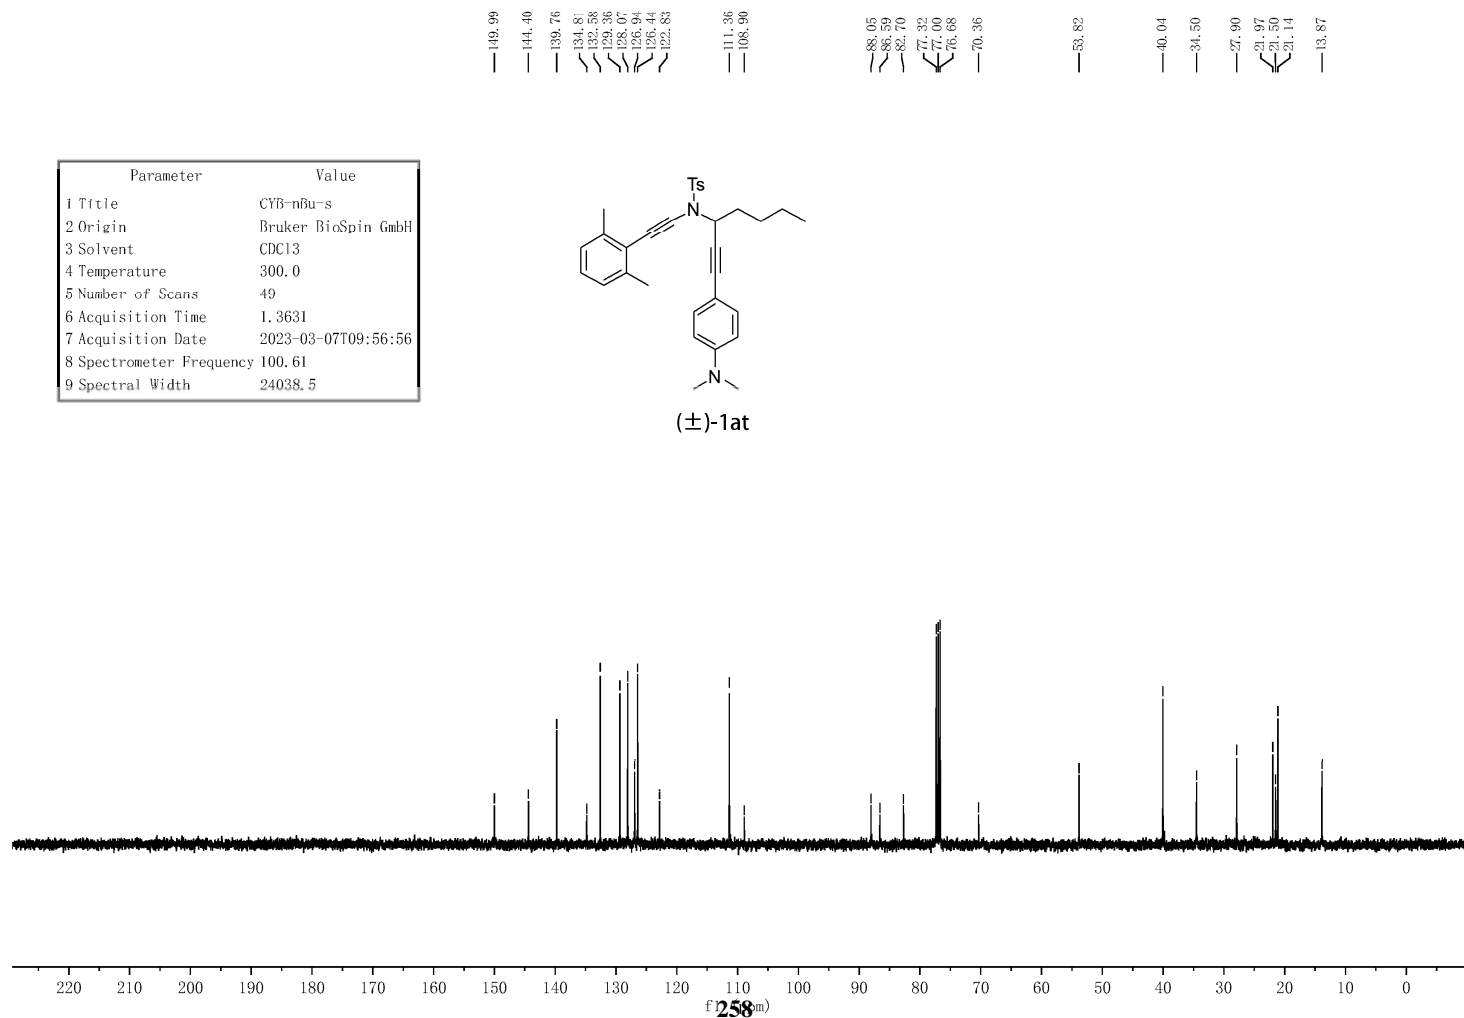

Supplementary Figure 158 <sup>1</sup>H and <sup>13</sup>C NMR spectra for (±)-1at

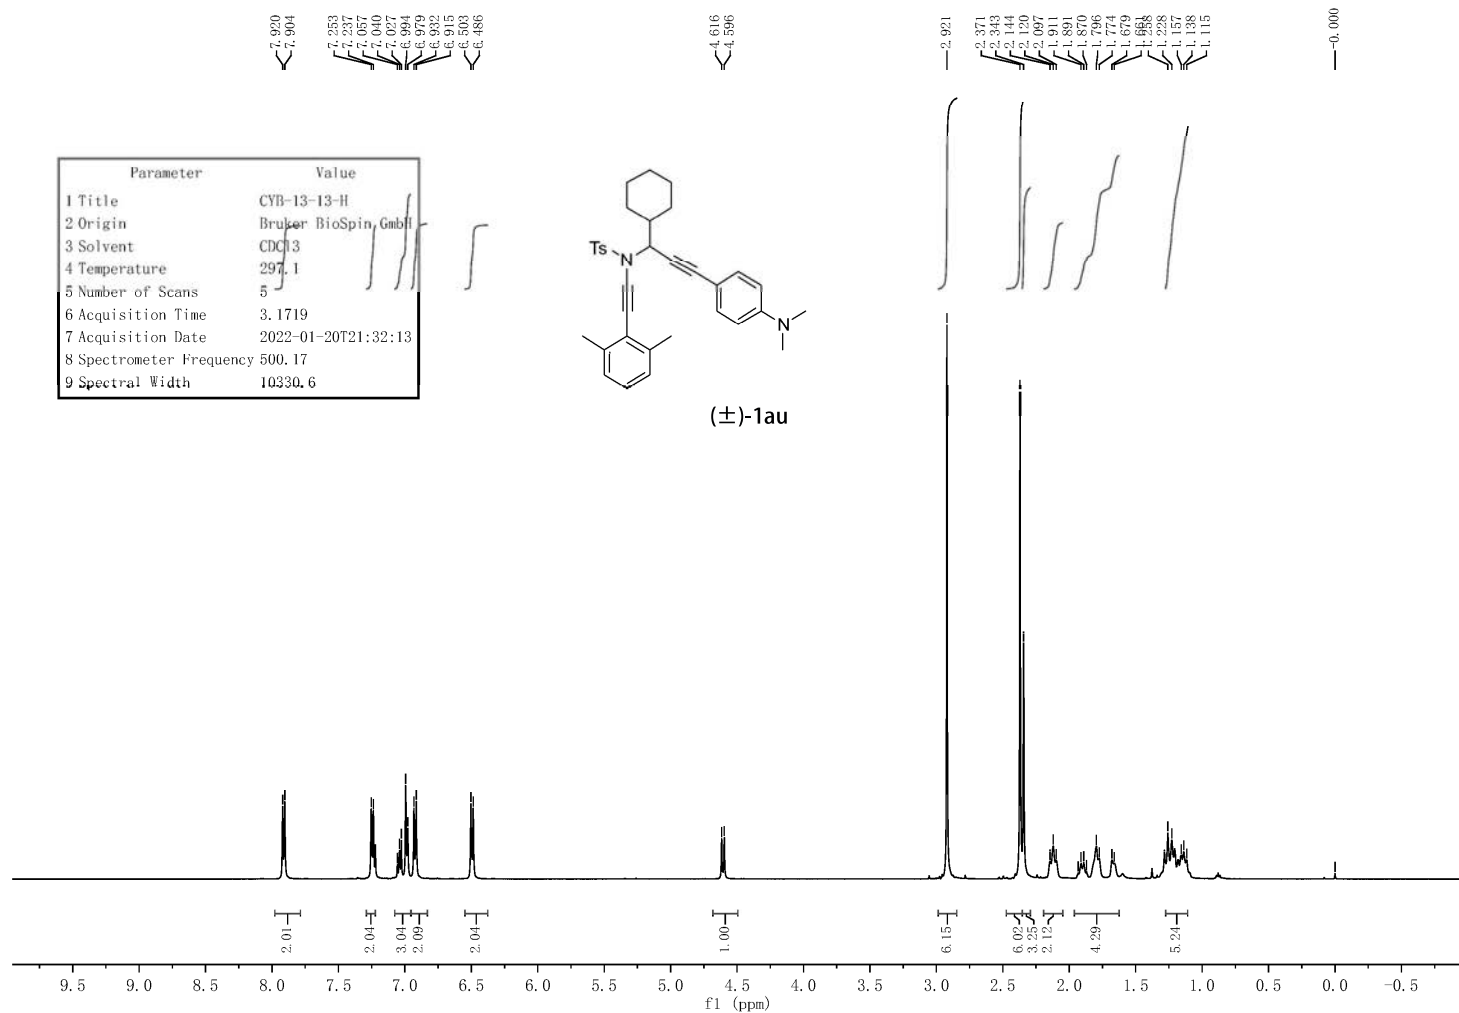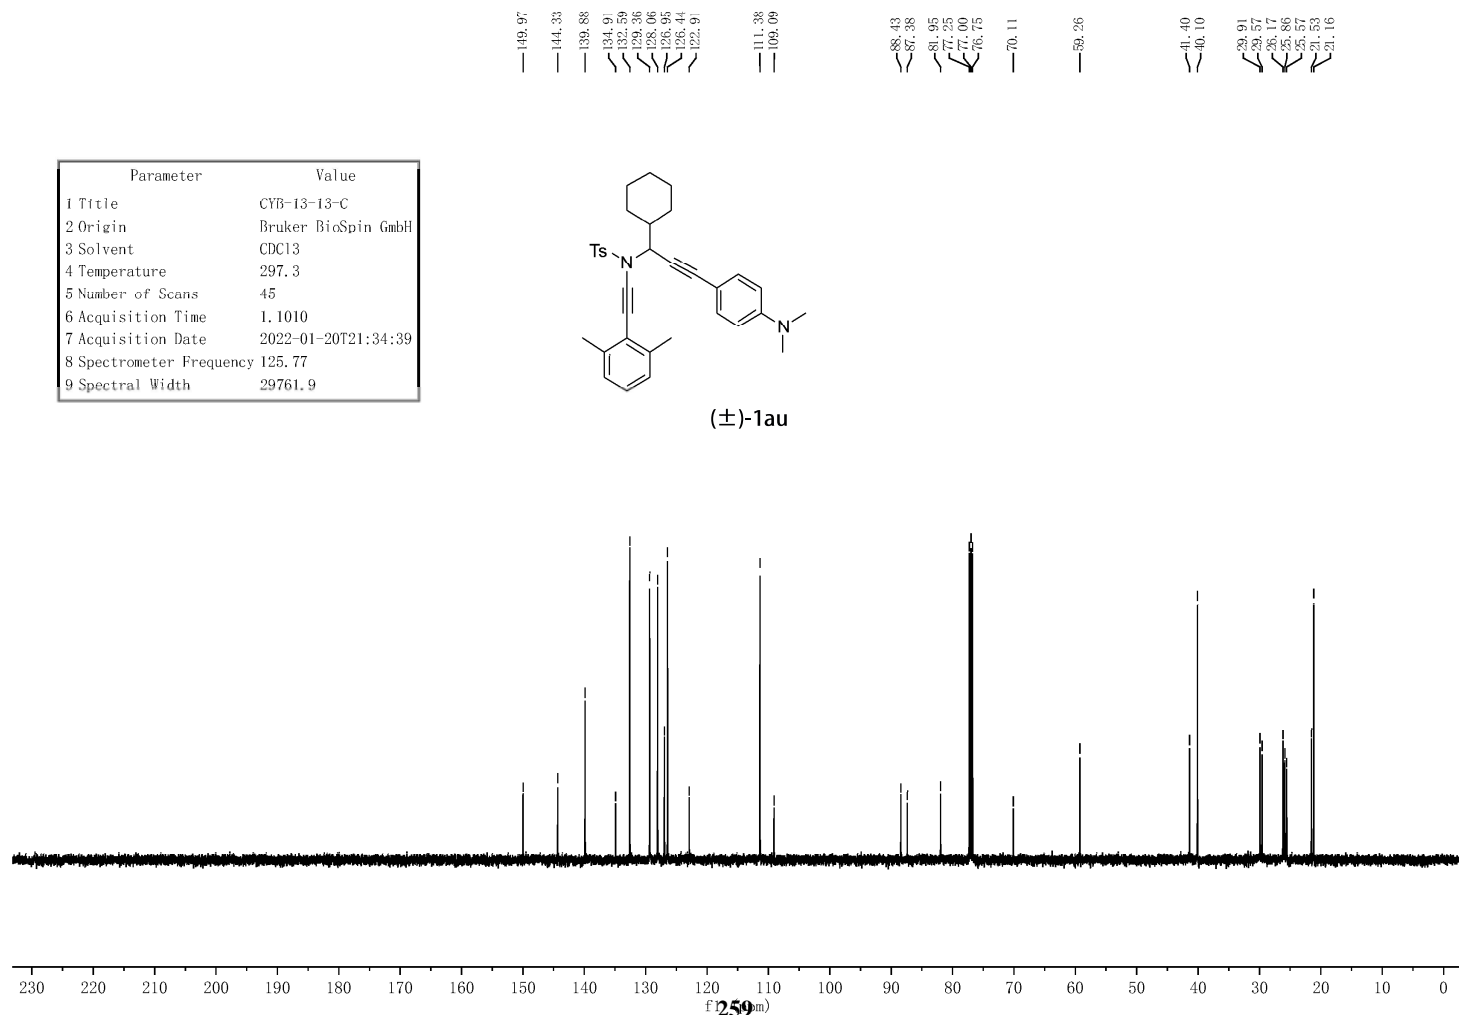

Supplementary Figure 159. <sup>1</sup>H and <sup>13</sup>C NMR spectra for (±)-1au

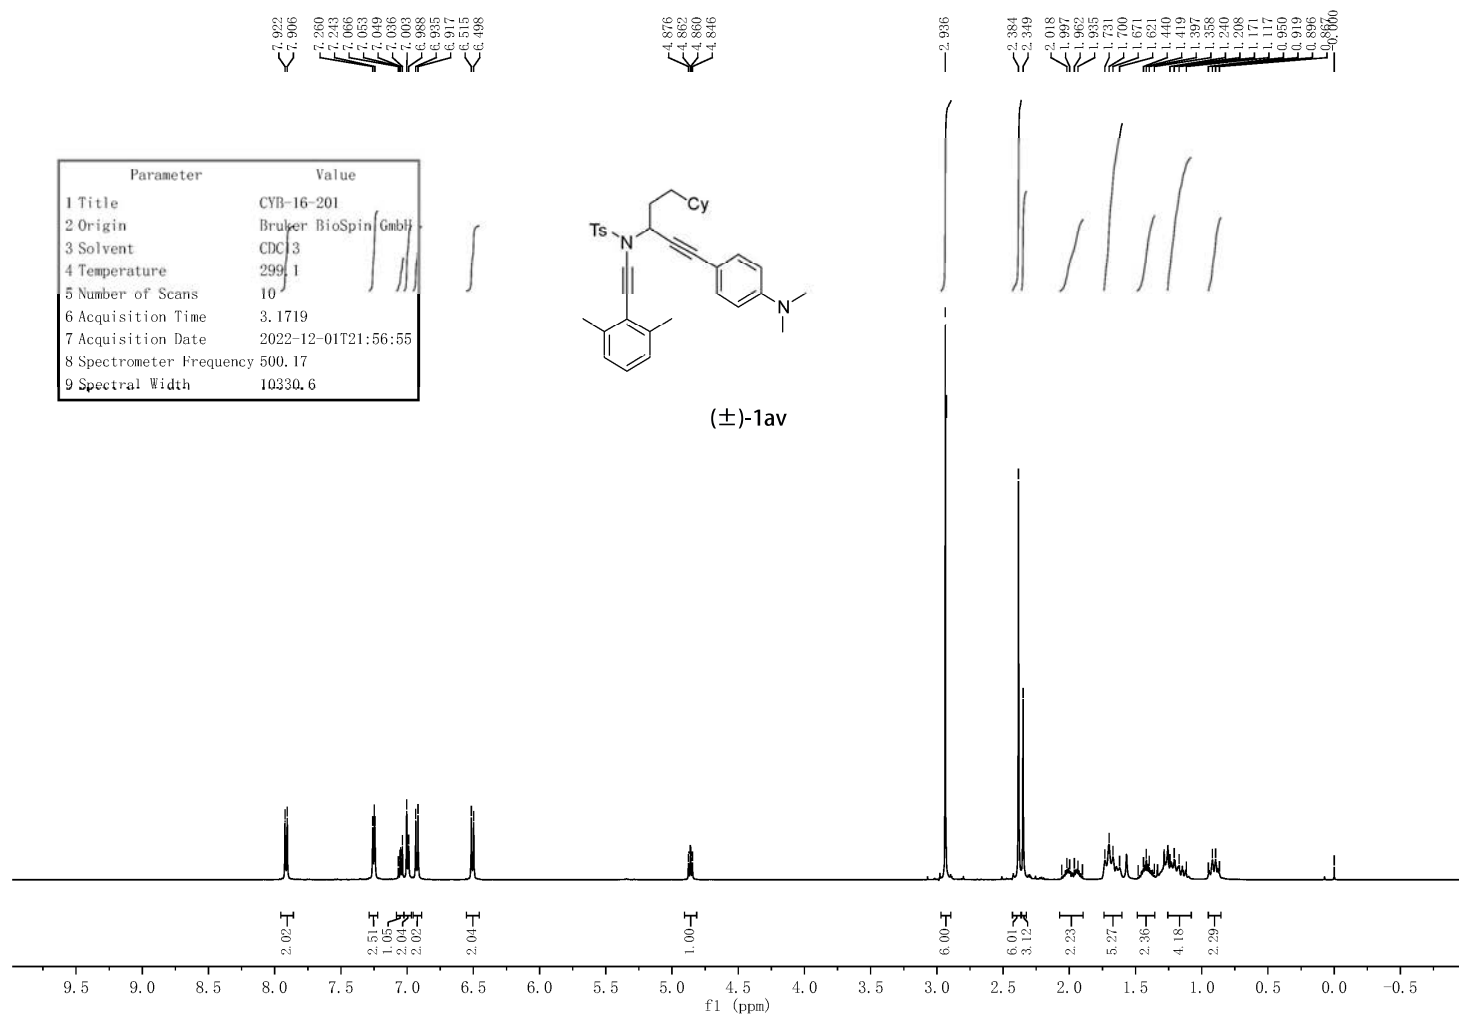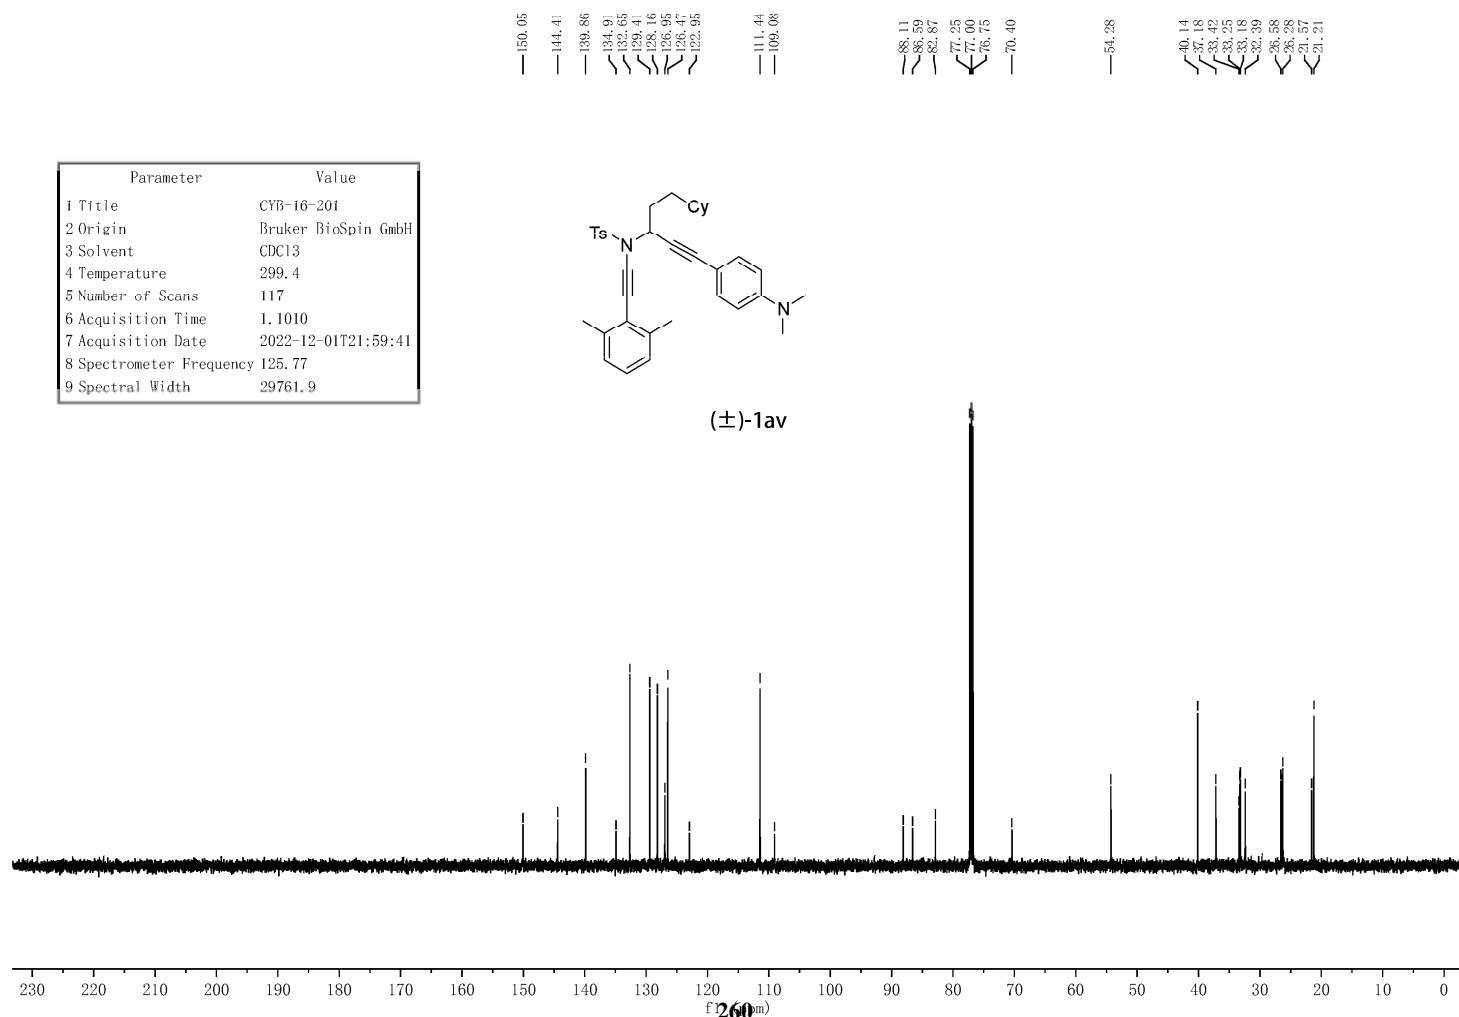

Supplementary Figure 160. <sup>1</sup>H and <sup>13</sup>C NMR spectra for (±)-1av

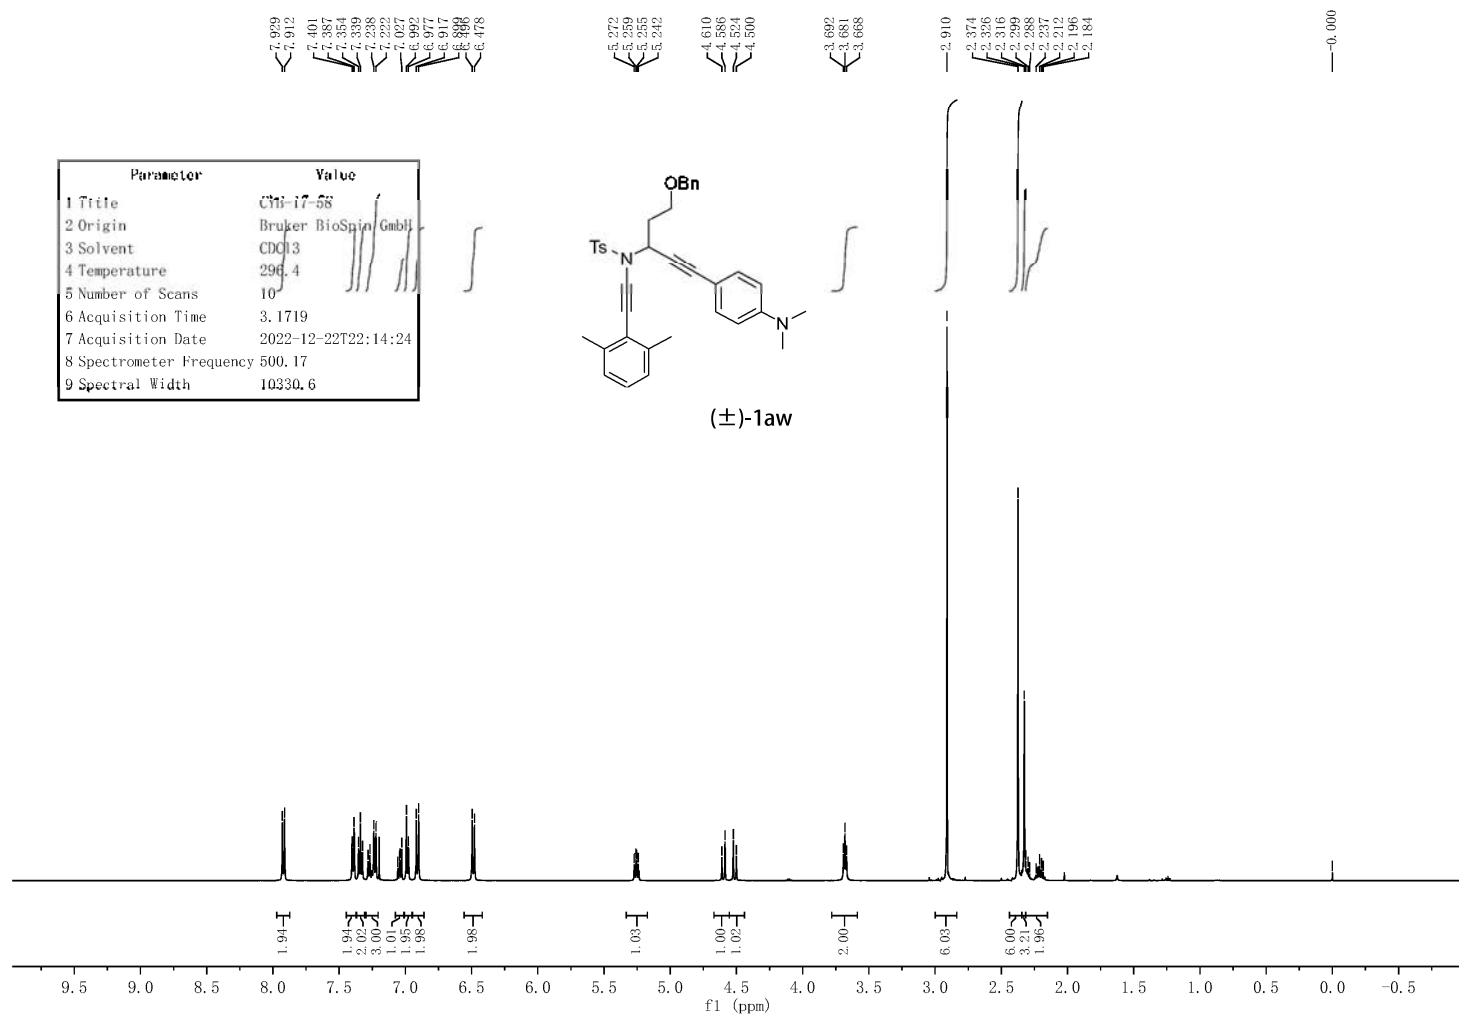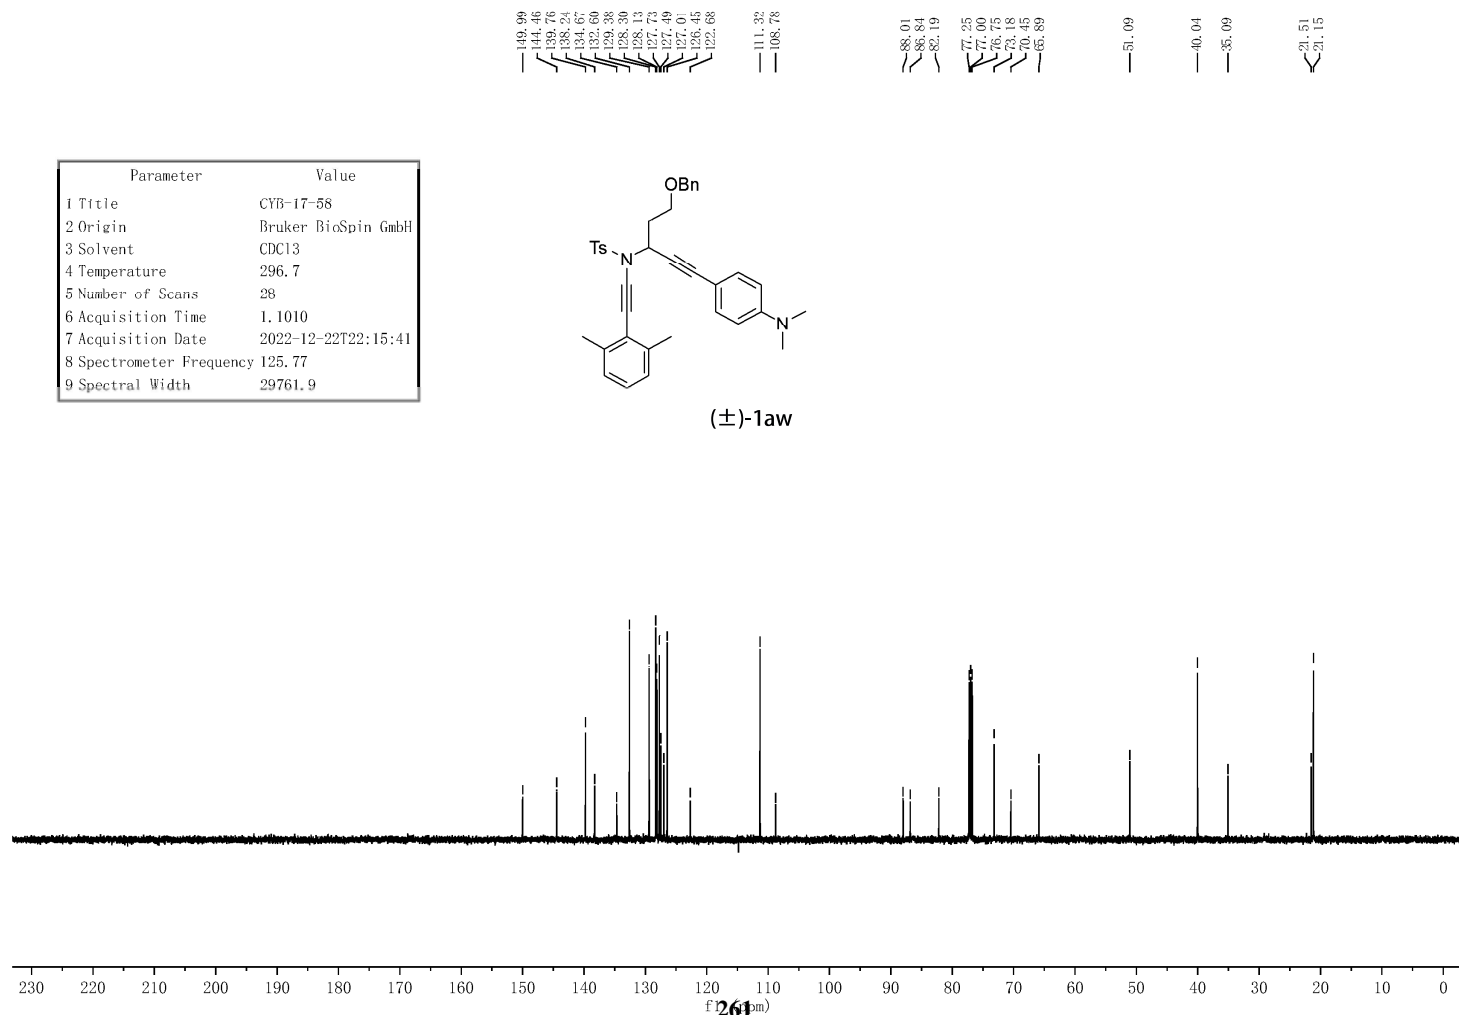

Supplementary Figure 161. <sup>1</sup>H and <sup>13</sup>C NMR spectra for (±)-1aw

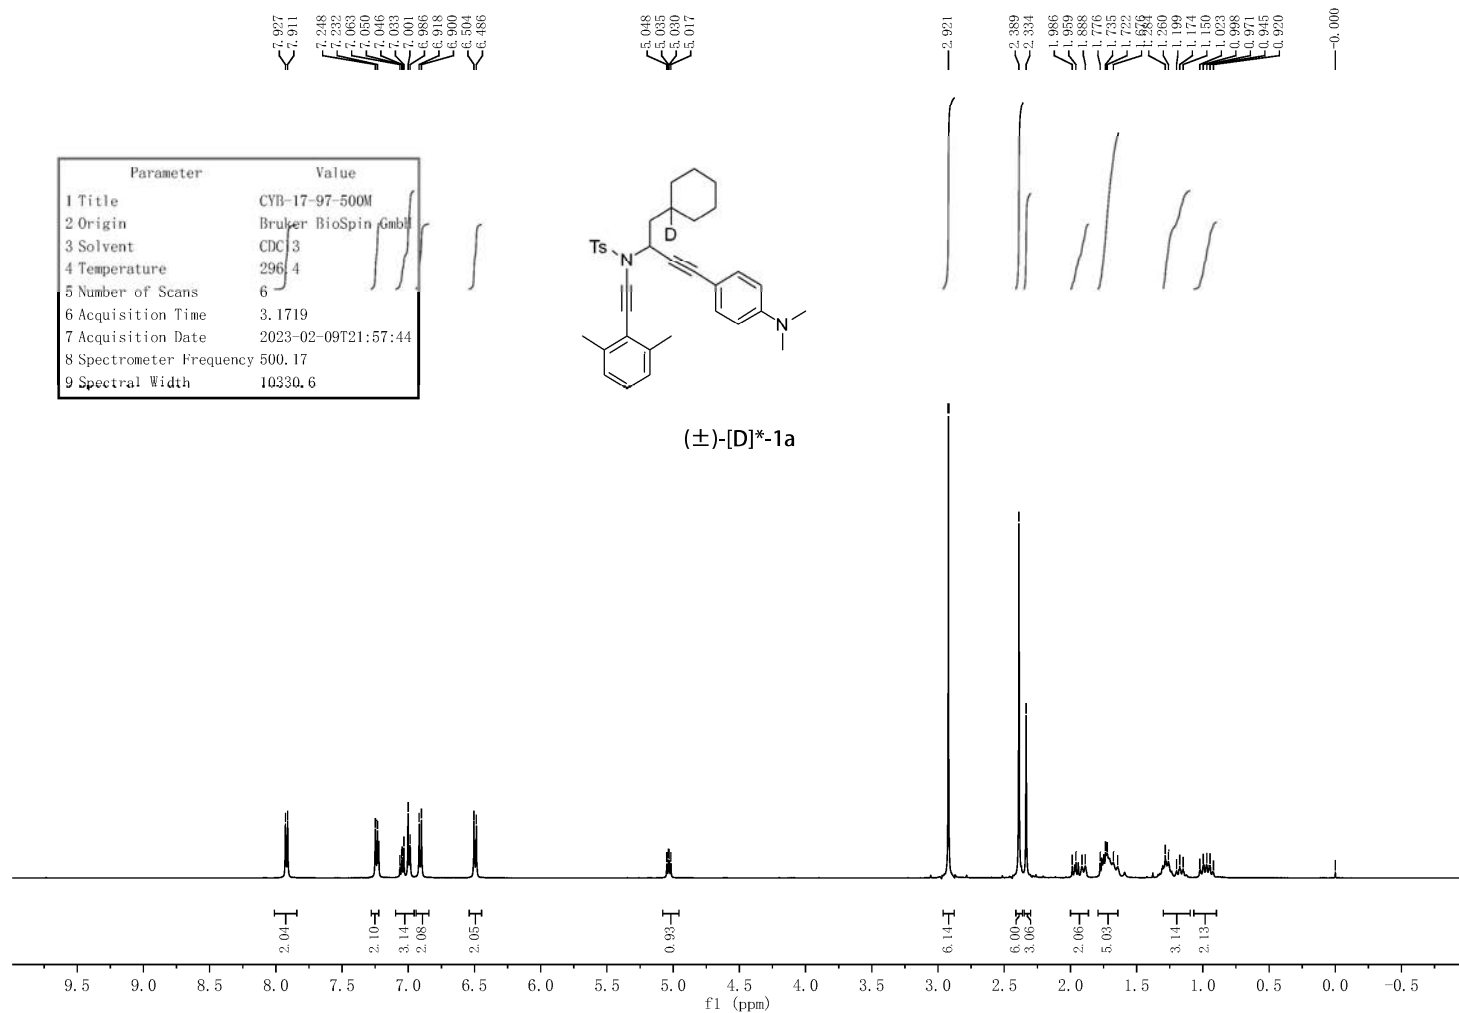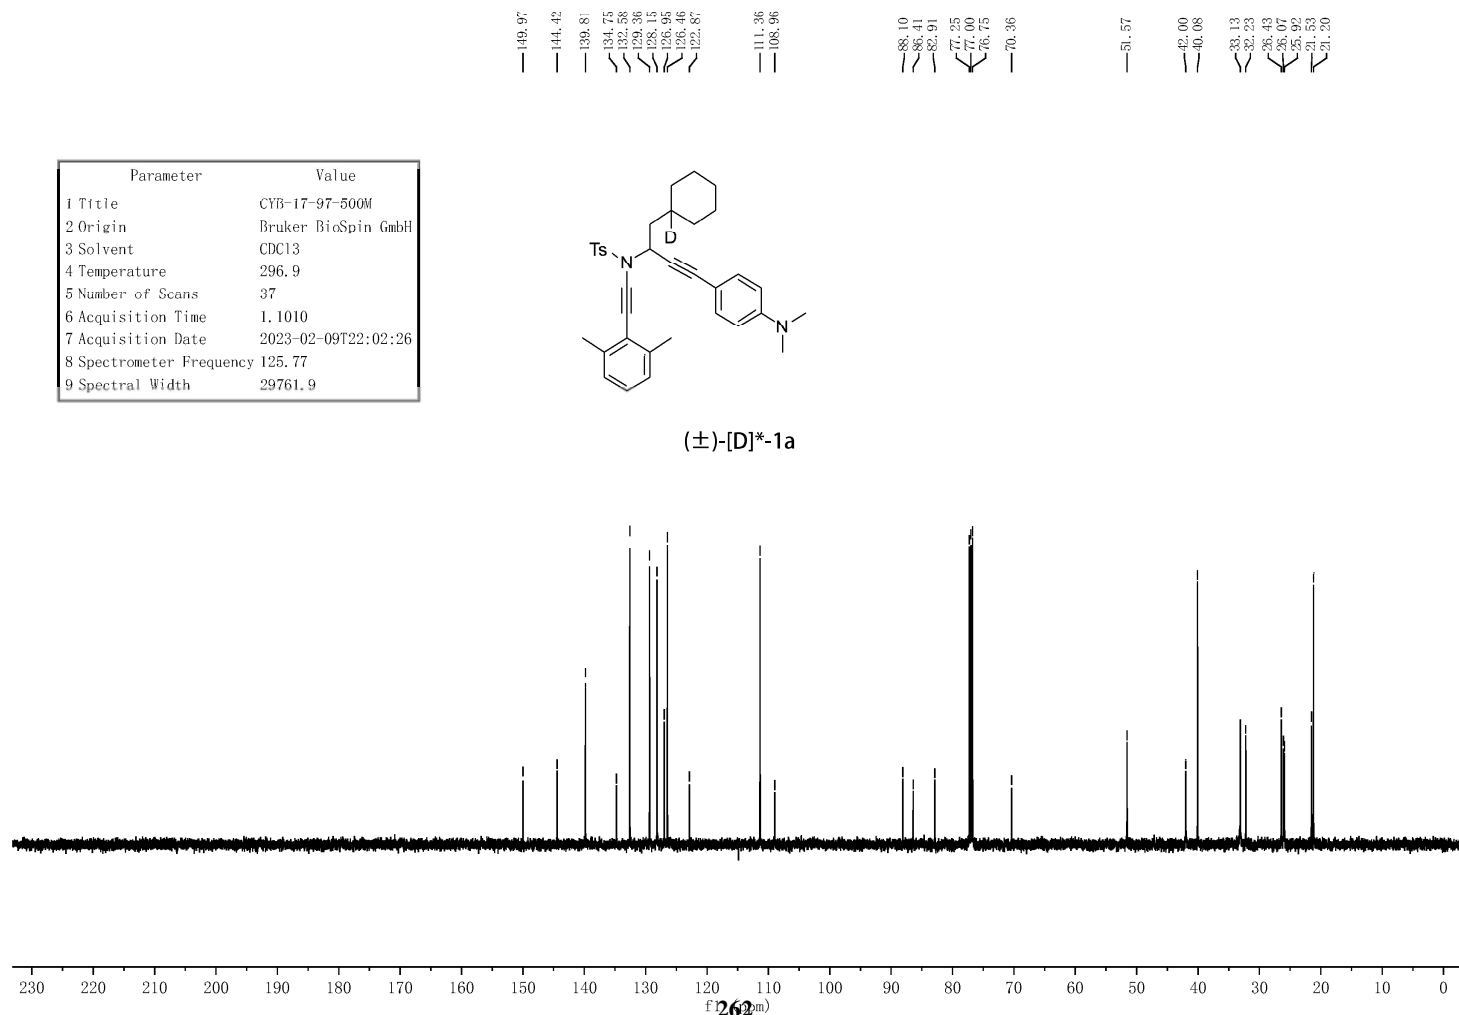

Supplementary Figure 162. <sup>1</sup>H and <sup>13</sup>C NMR spectra for (±)-[D]\*-1a

132.70  
129.48  
128.27  
127.07  
126.57

11.48

51.68

49.11  
46.20

38.24  
32.34  
26.55  
26.19  
21.65  
21.31

| Parameter                | Value               |
|--------------------------|---------------------|
| 1 Title                  | CYB-17-97-500M      |
| 2 Origin                 | Bruker BioSpin GmbH |
| 3 Solvent                | CDCl3               |
| 4 Temperature            | 296.9               |
| 5 Number of Scans        | 15                  |
| 6 Acquisition Time       | 1.1010              |
| 7 Acquisition Date       | 2023-02-09T22:04:41 |
| 8 Spectrometer Frequency | 125.77              |
| 9 Spectral Width         | 29761.9             |

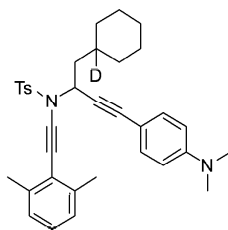

(±)-[D]\*-1a

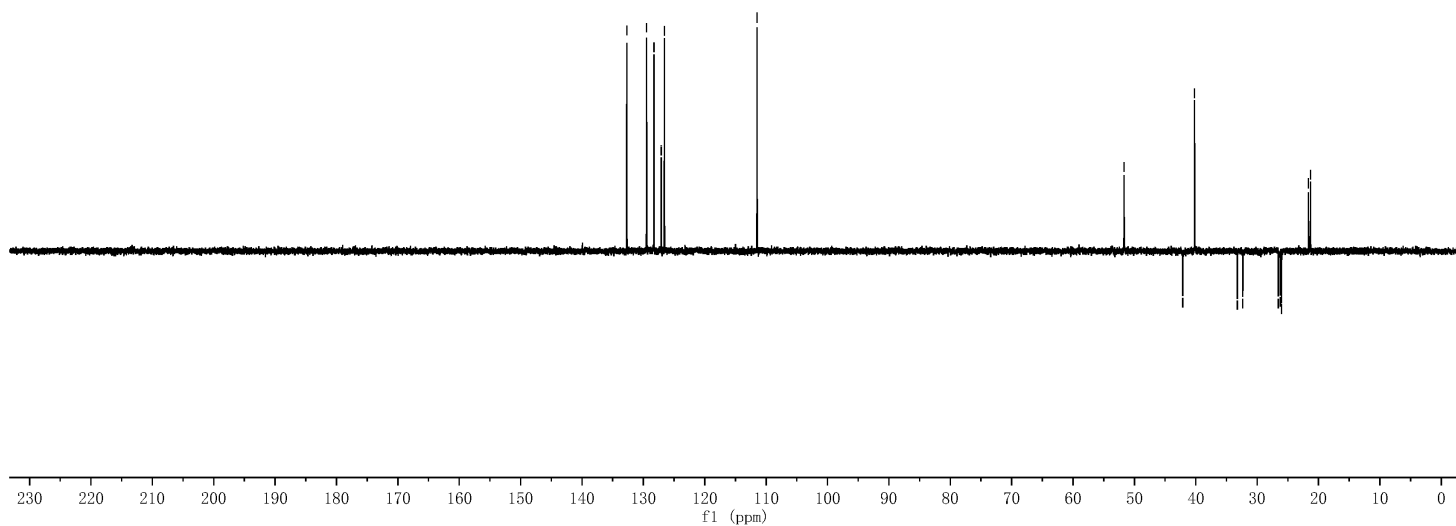

Supplementary Figure 163. DEPT-135 NMR spectra for (±)-[D]\*-1a

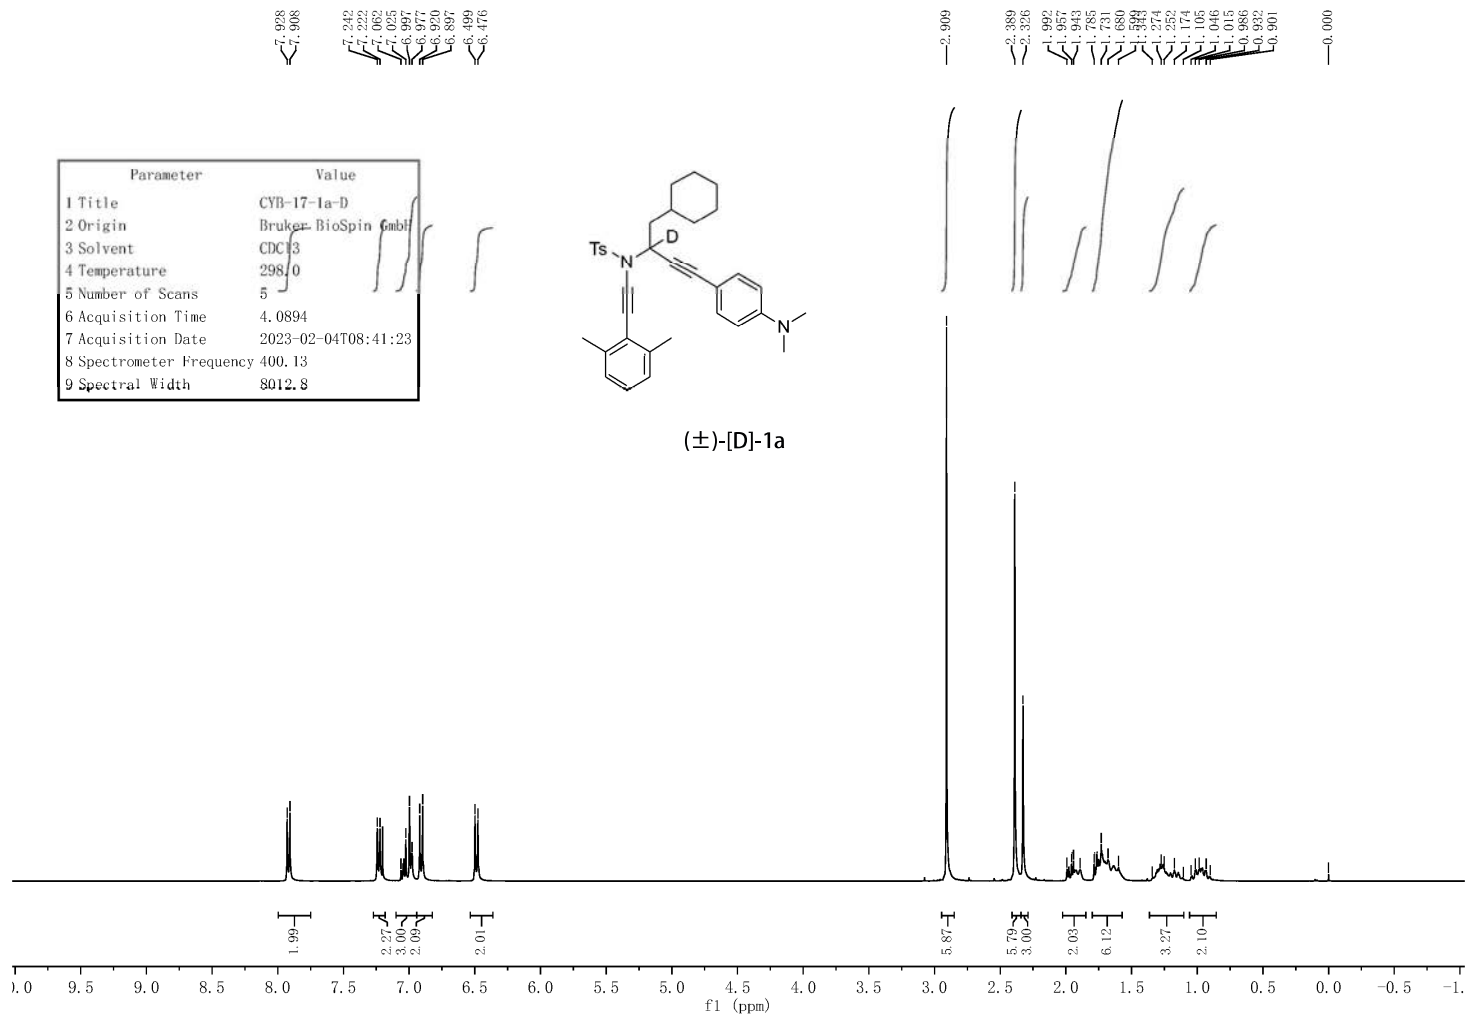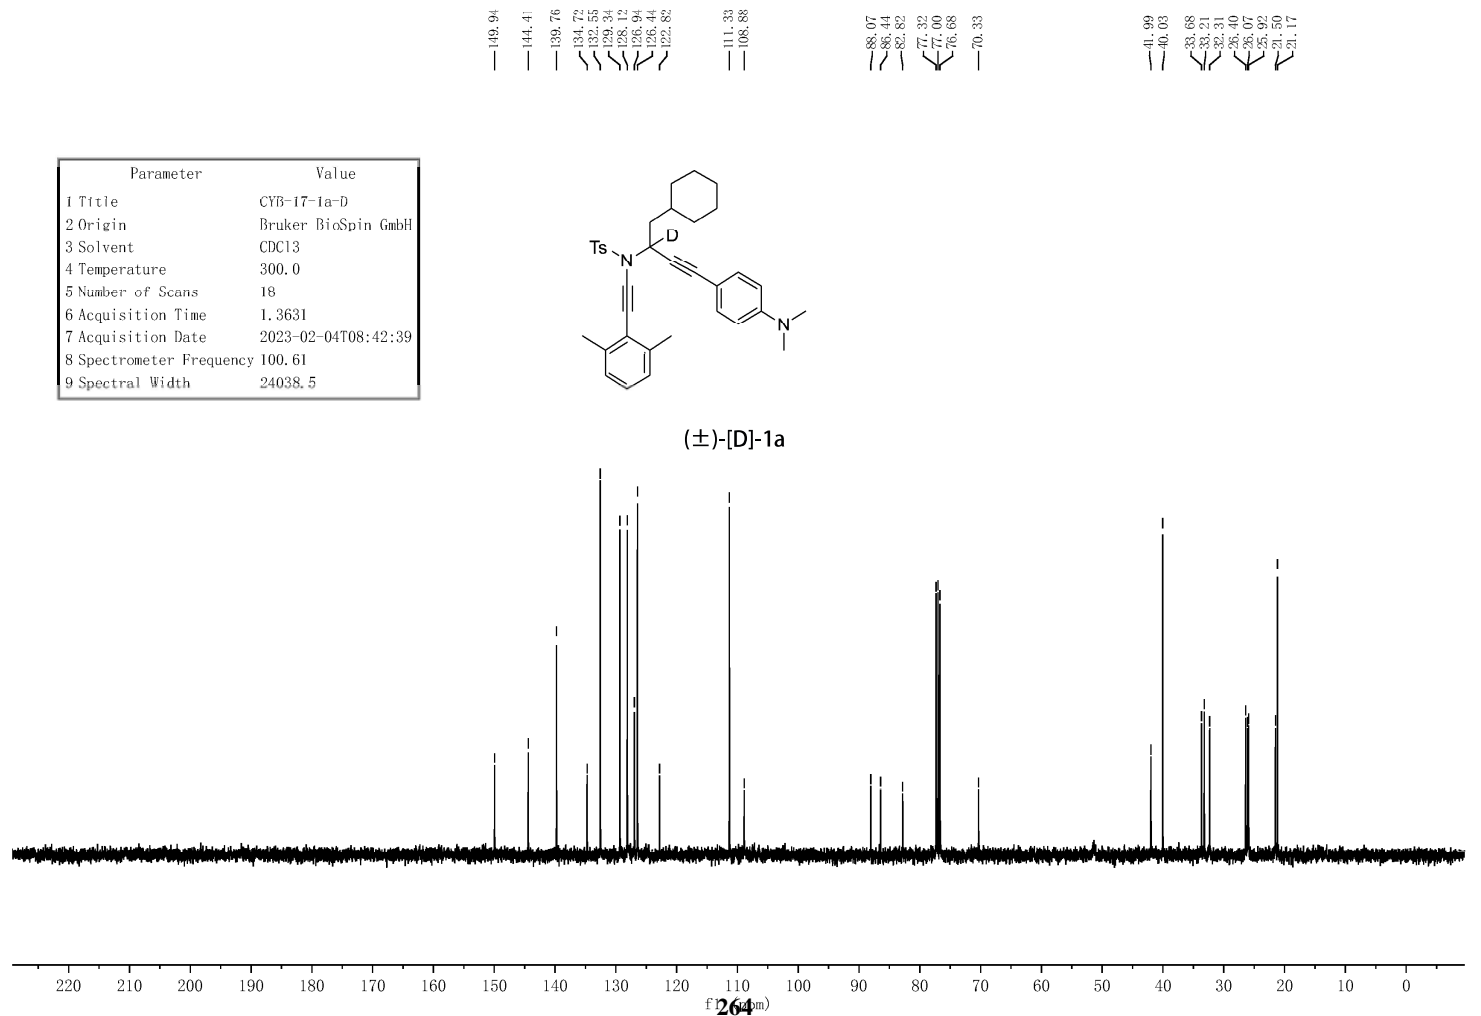

Supplementary Figure 164. <sup>1</sup>H and <sup>13</sup>C NMR spectra for (±)-[D]-1a



132.55  
129.34  
128.12  
126.94  
126.44

11.33

41.99  
40.03  
33.68  
33.21  
32.32  
32.40  
26.07  
25.82  
21.17

| Parameter                | Value               |
|--------------------------|---------------------|
| 1 Title                  | CYB-17-1a-D         |
| 2 Origin                 | Bruker BioSpin GmbH |
| 3 Solvent                | CDCl3               |
| 4 Temperature            | 300.0               |
| 5 Number of Scans        | 10                  |
| 6 Acquisition Time       | 1.3631              |
| 7 Acquisition Date       | 2023-02-04T08:44:28 |
| 8 Spectrometer Frequency | 100.61              |
| 9 Spectral Width         | 24038.5             |

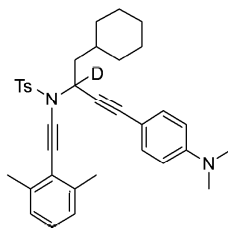

(±)-[D]-1a

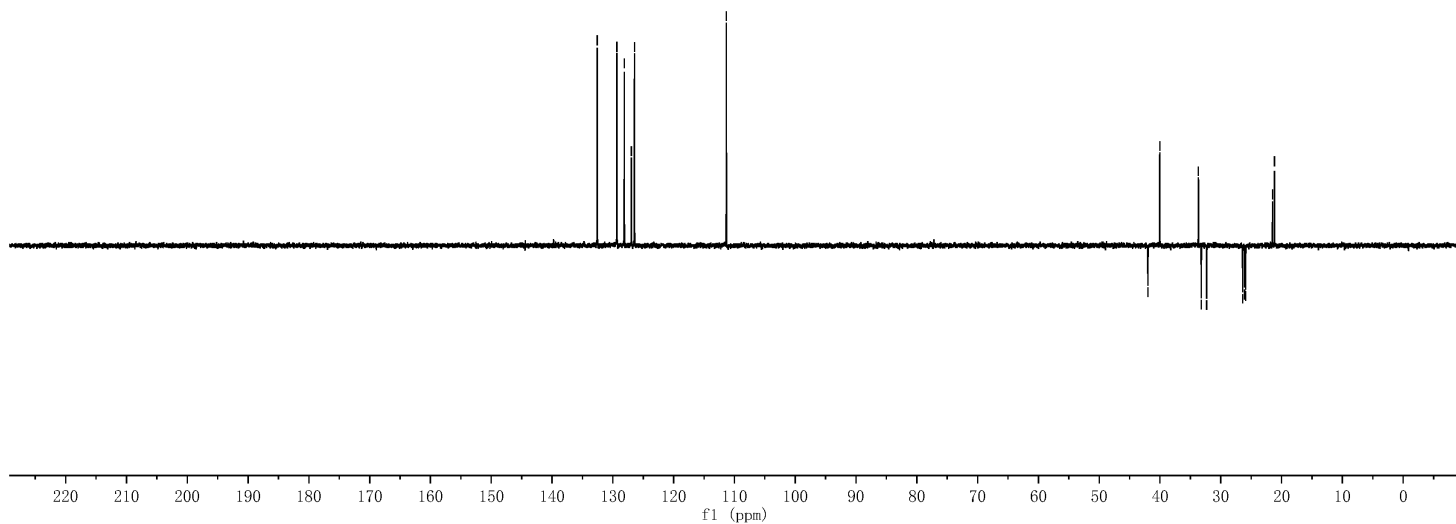

Supplementary Figure 165. DEPT-135 NMR spectra for (±)-[D]-1a

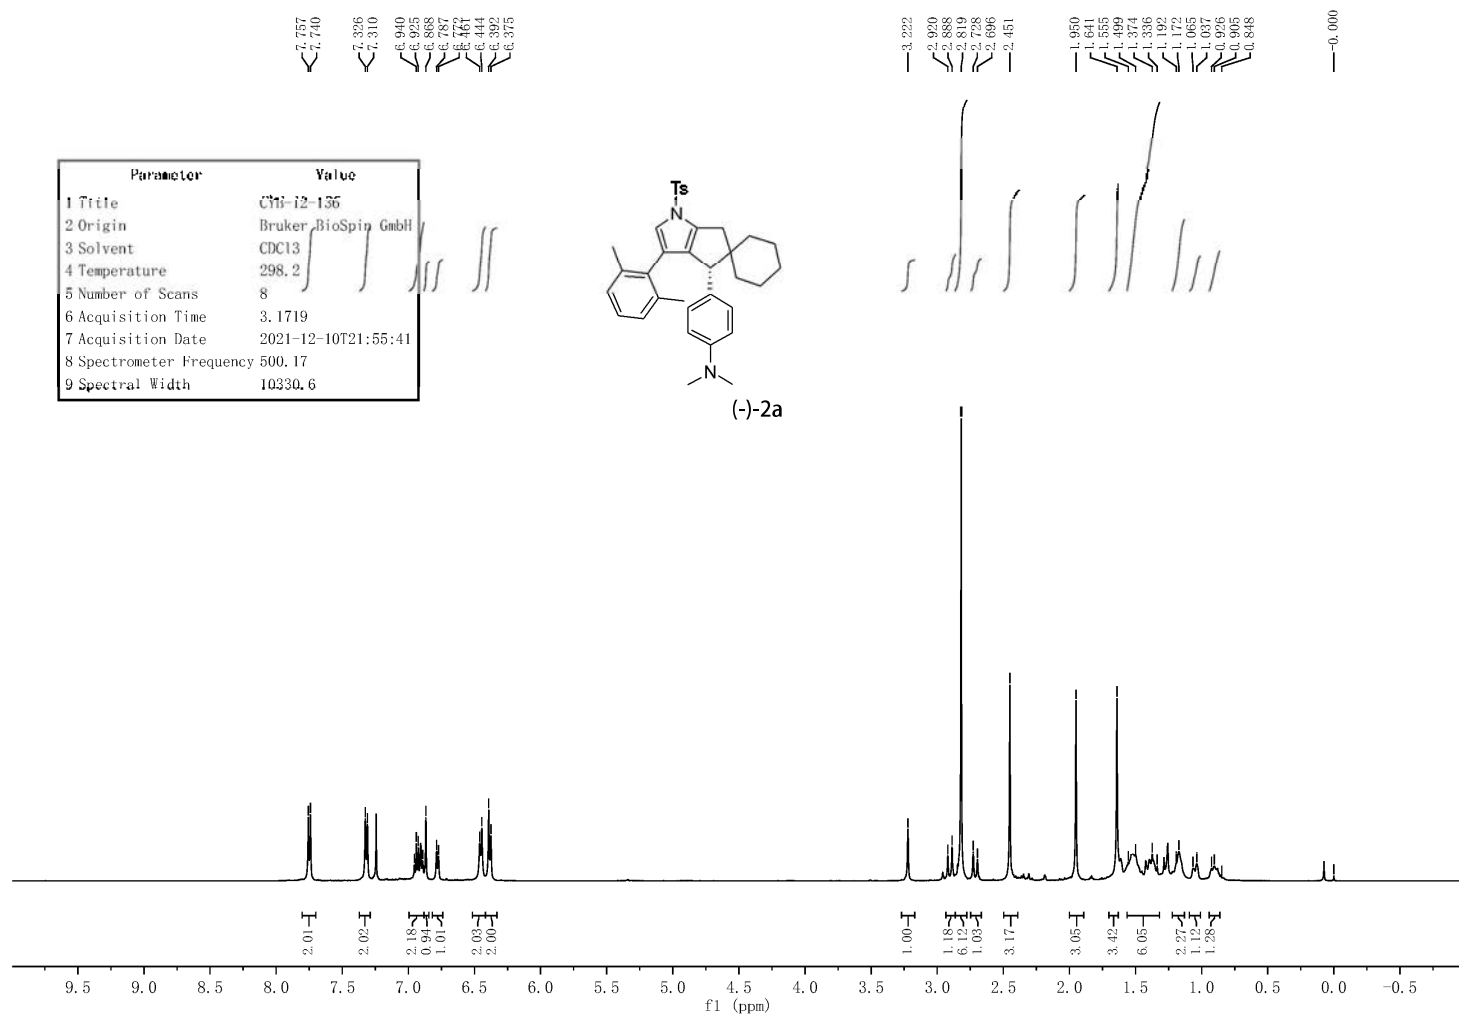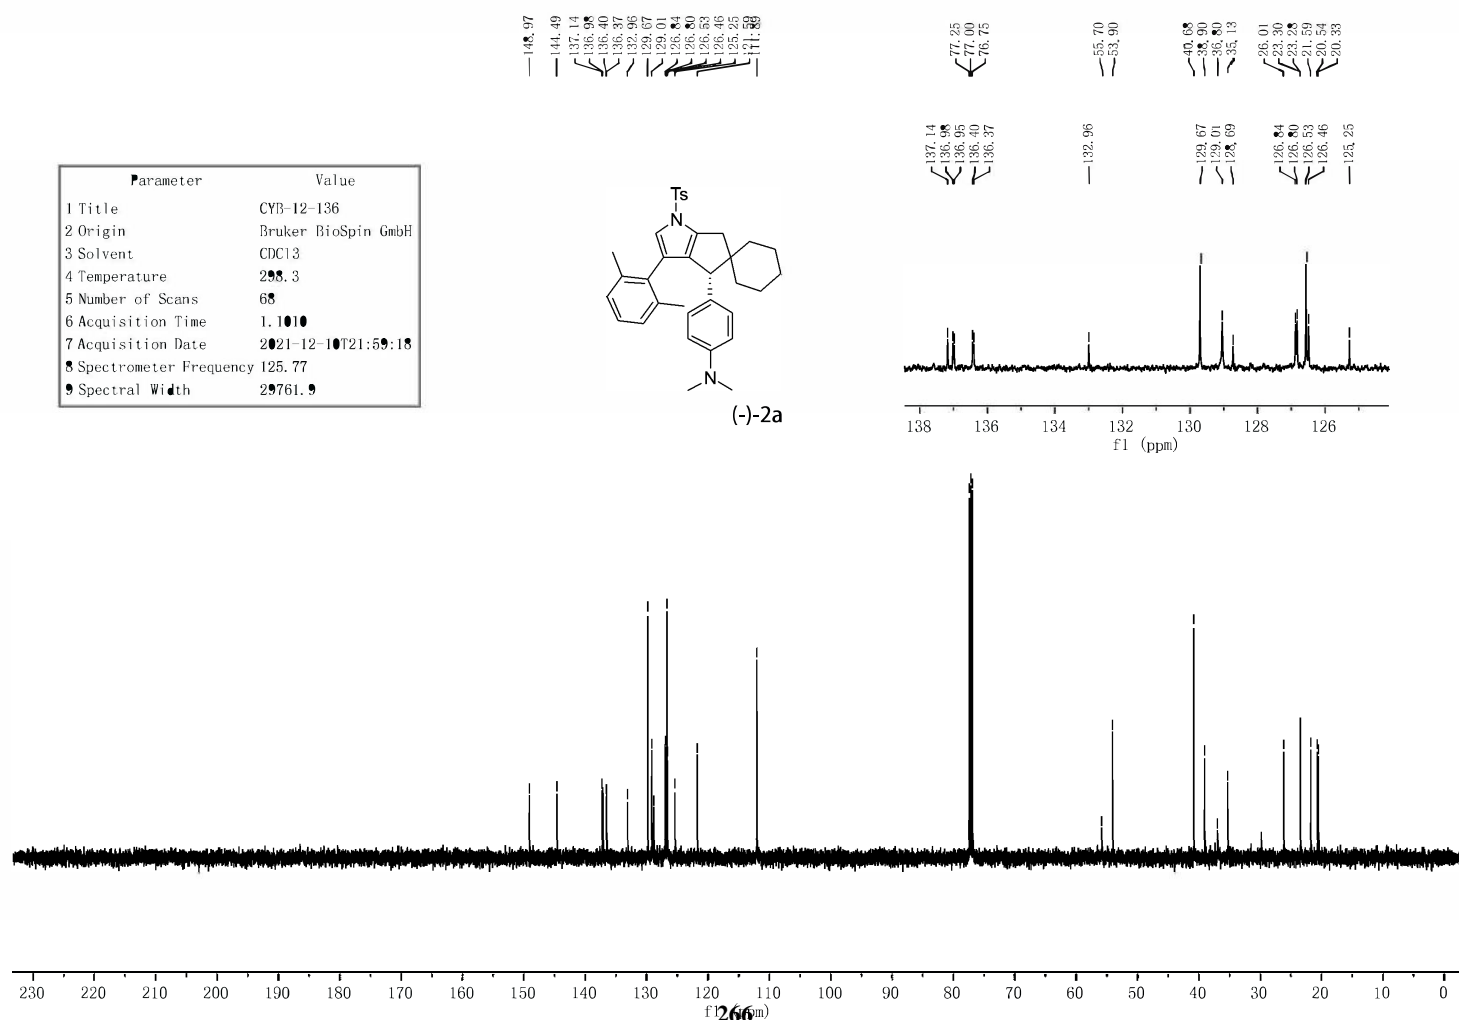

Supplementary Figure 166.  $^1\text{H}$  and  $^{13}\text{C}$  NMR spectra for (-)-2a

129.74  
129.08  
126.91  
126.86  
126.60  
126.52  
121.65

11.95

40.75  
38.97  
35.20

26.07  
23.35  
21.66  
20.60  
20.40

| Parameter                | Value               |
|--------------------------|---------------------|
| 1 Title                  | CYB-12-136          |
| 2 Origin                 | Bruker BioSpin GmbH |
| 3 Solvent                | CDCl3               |
| 4 Temperature            | 298.8               |
| 5 Number of Scans        | 29                  |
| 6 Acquisition Time       | 1.1010              |
| 7 Acquisition Date       | 2021-12-10T22:03:30 |
| 8 Spectrometer Frequency | 125.77              |
| 9 Spectral Width         | 29761.9             |

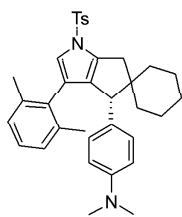

(-)-2a

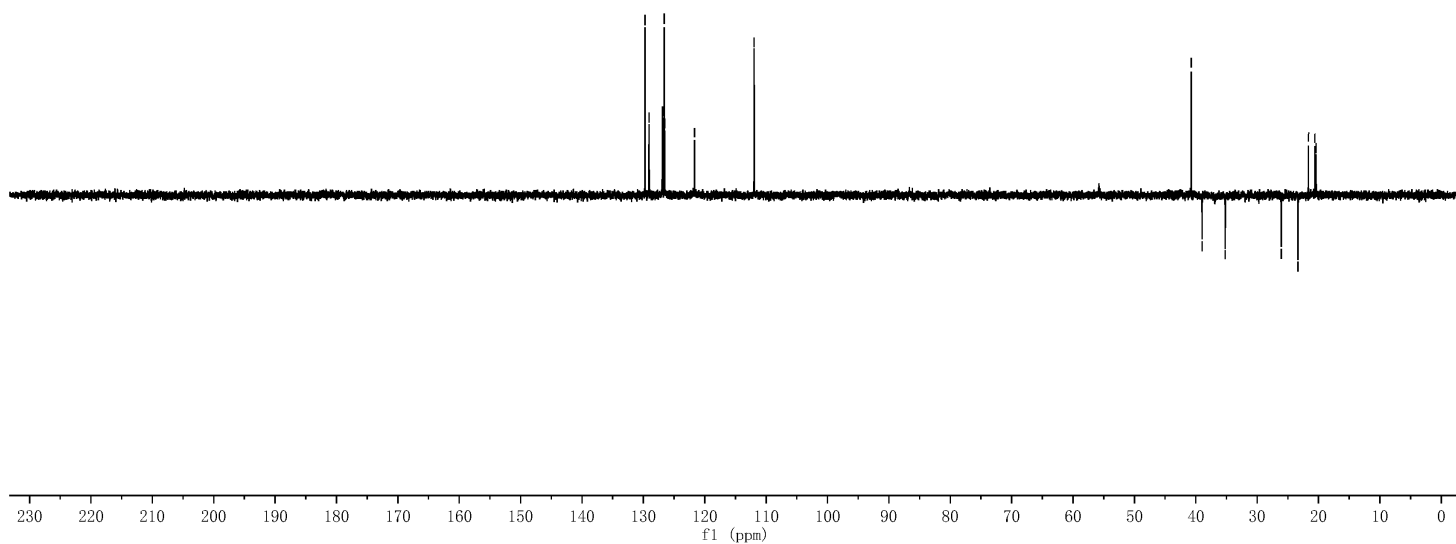

Supplementary Figure 167. DEPT-135 NMR spectra for (-)-2a

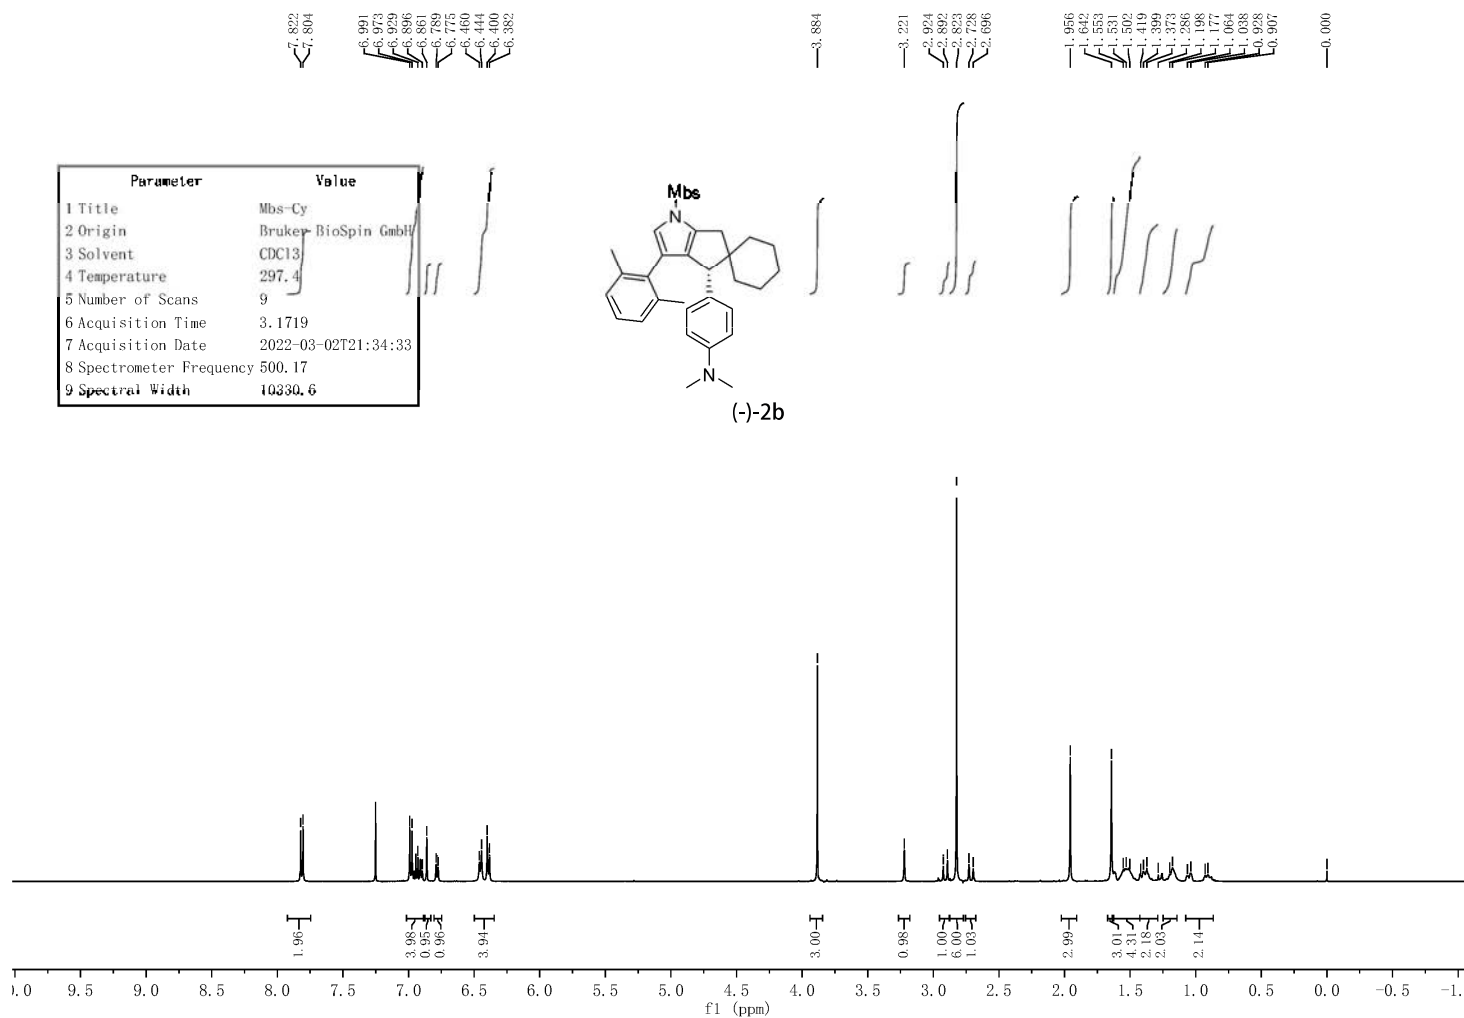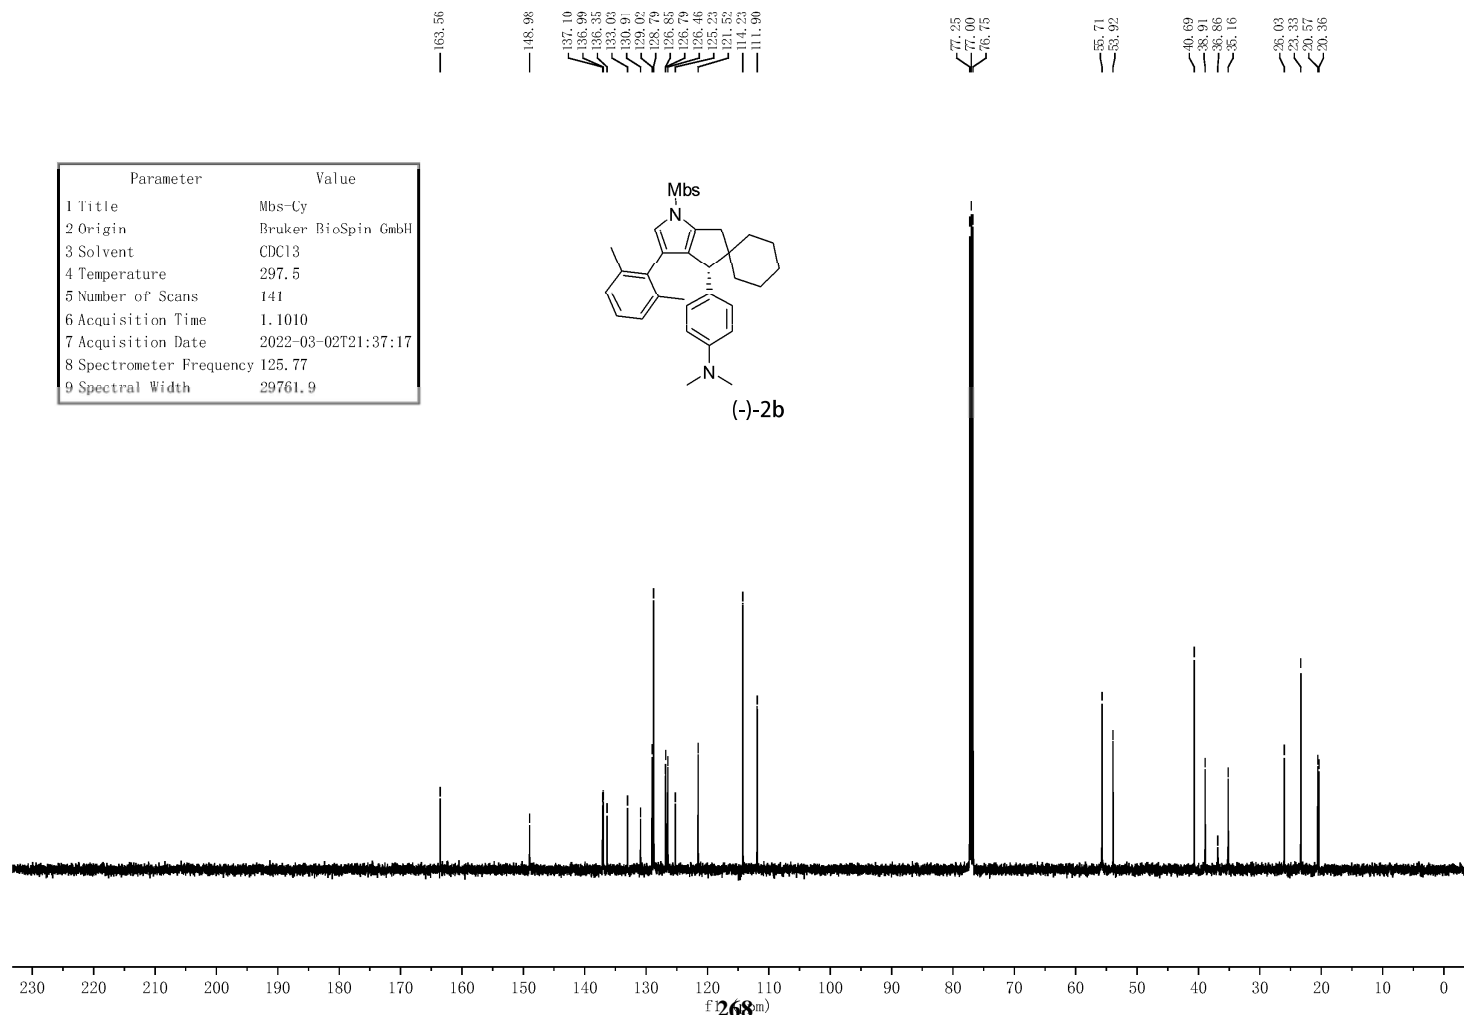

Supplementary Figure 168 <sup>1</sup>H and <sup>13</sup>C NMR spectra for (-)-2b

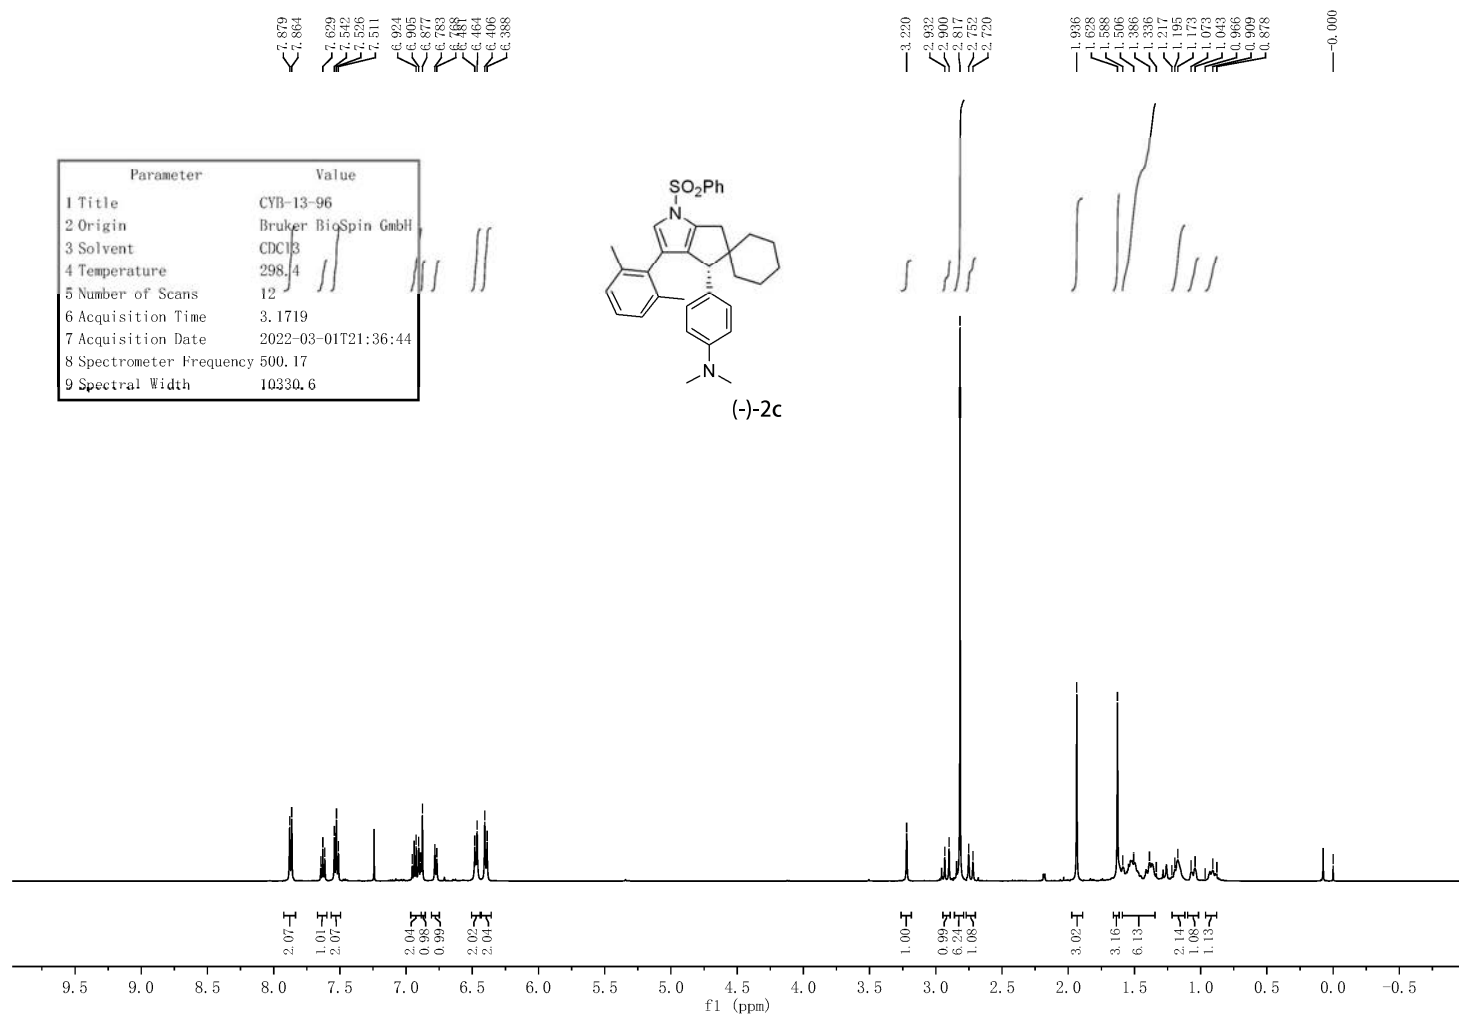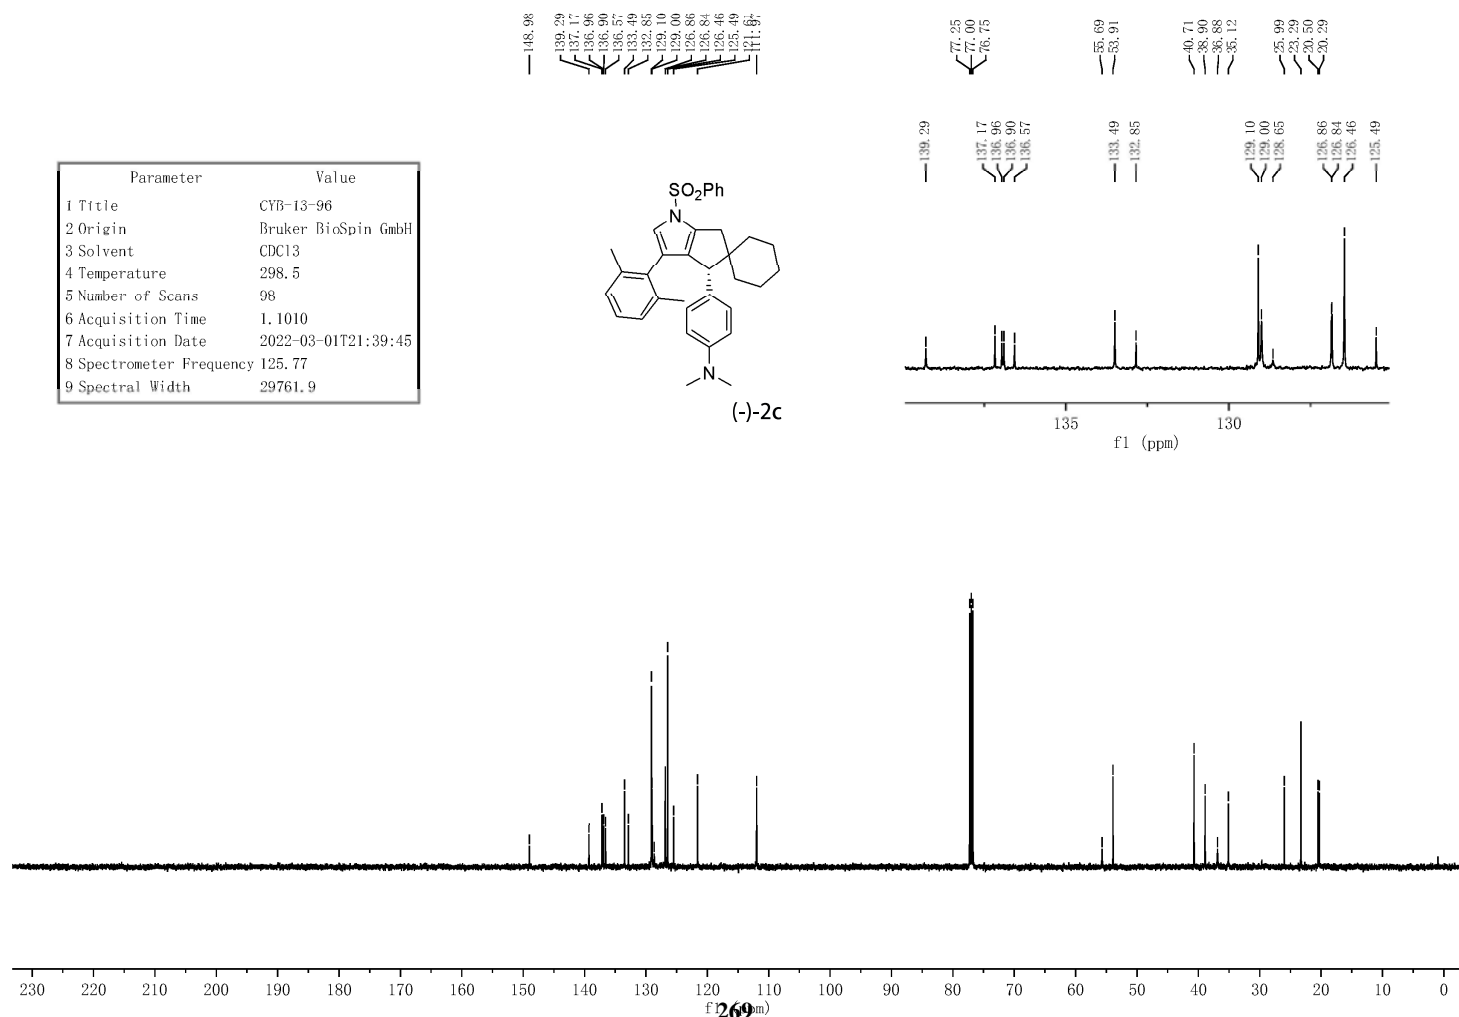

Supplementary Figure 169. <sup>1</sup>H and <sup>13</sup>C NMR spectra for (-)-2c

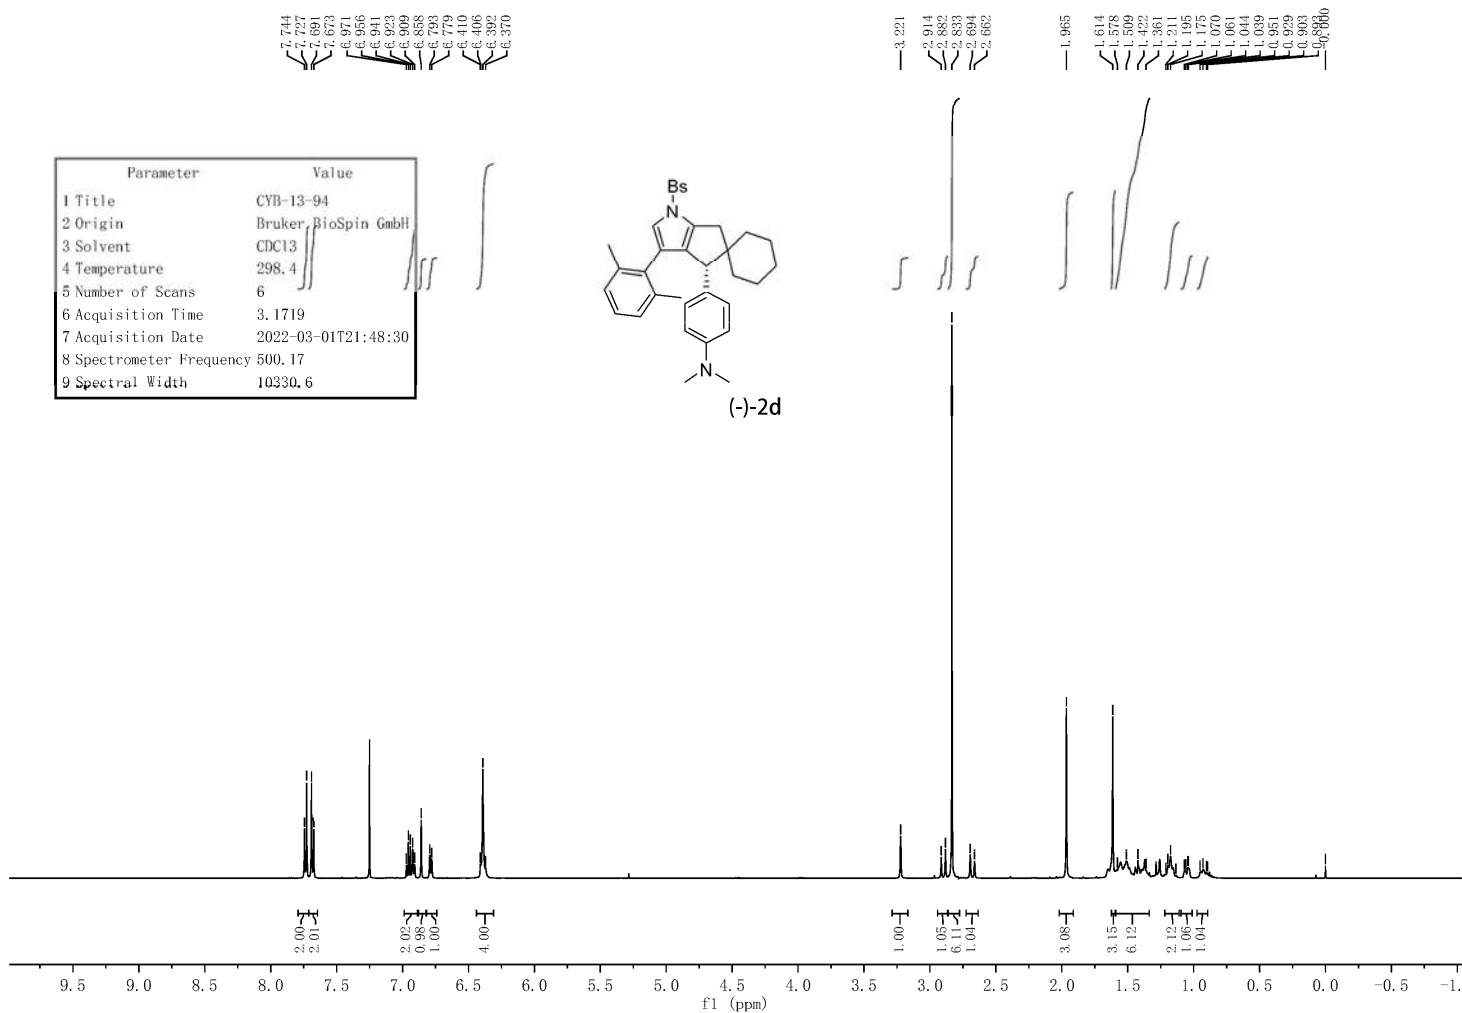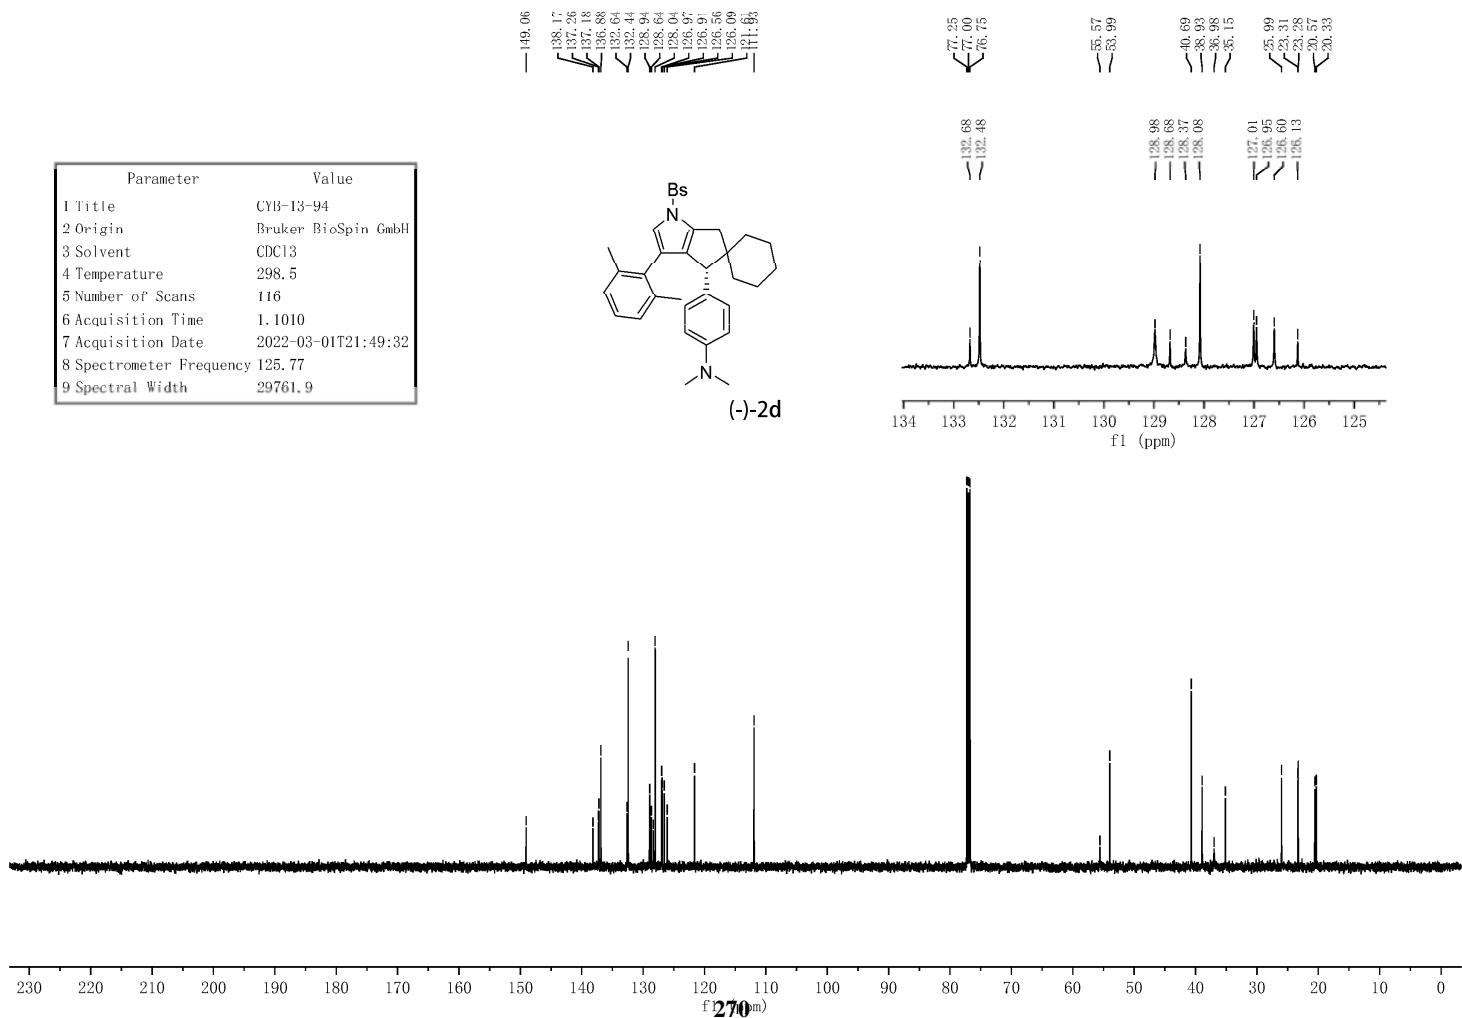

Supplementary Figure 170. <sup>1</sup>H and <sup>13</sup>C NMR spectra for (-)-2d

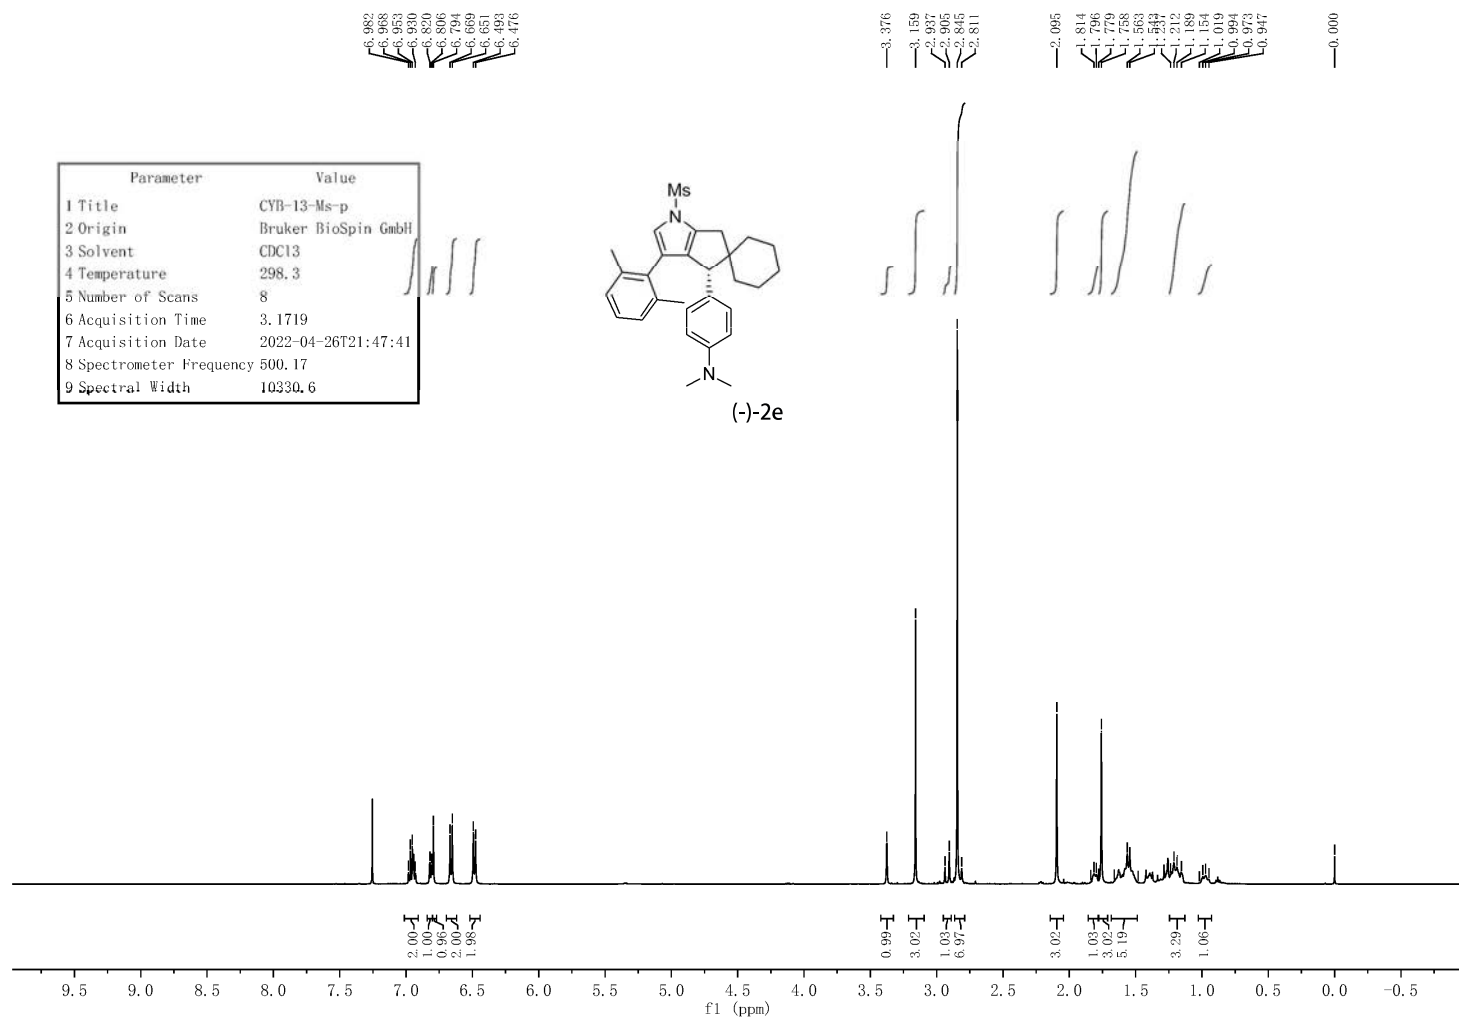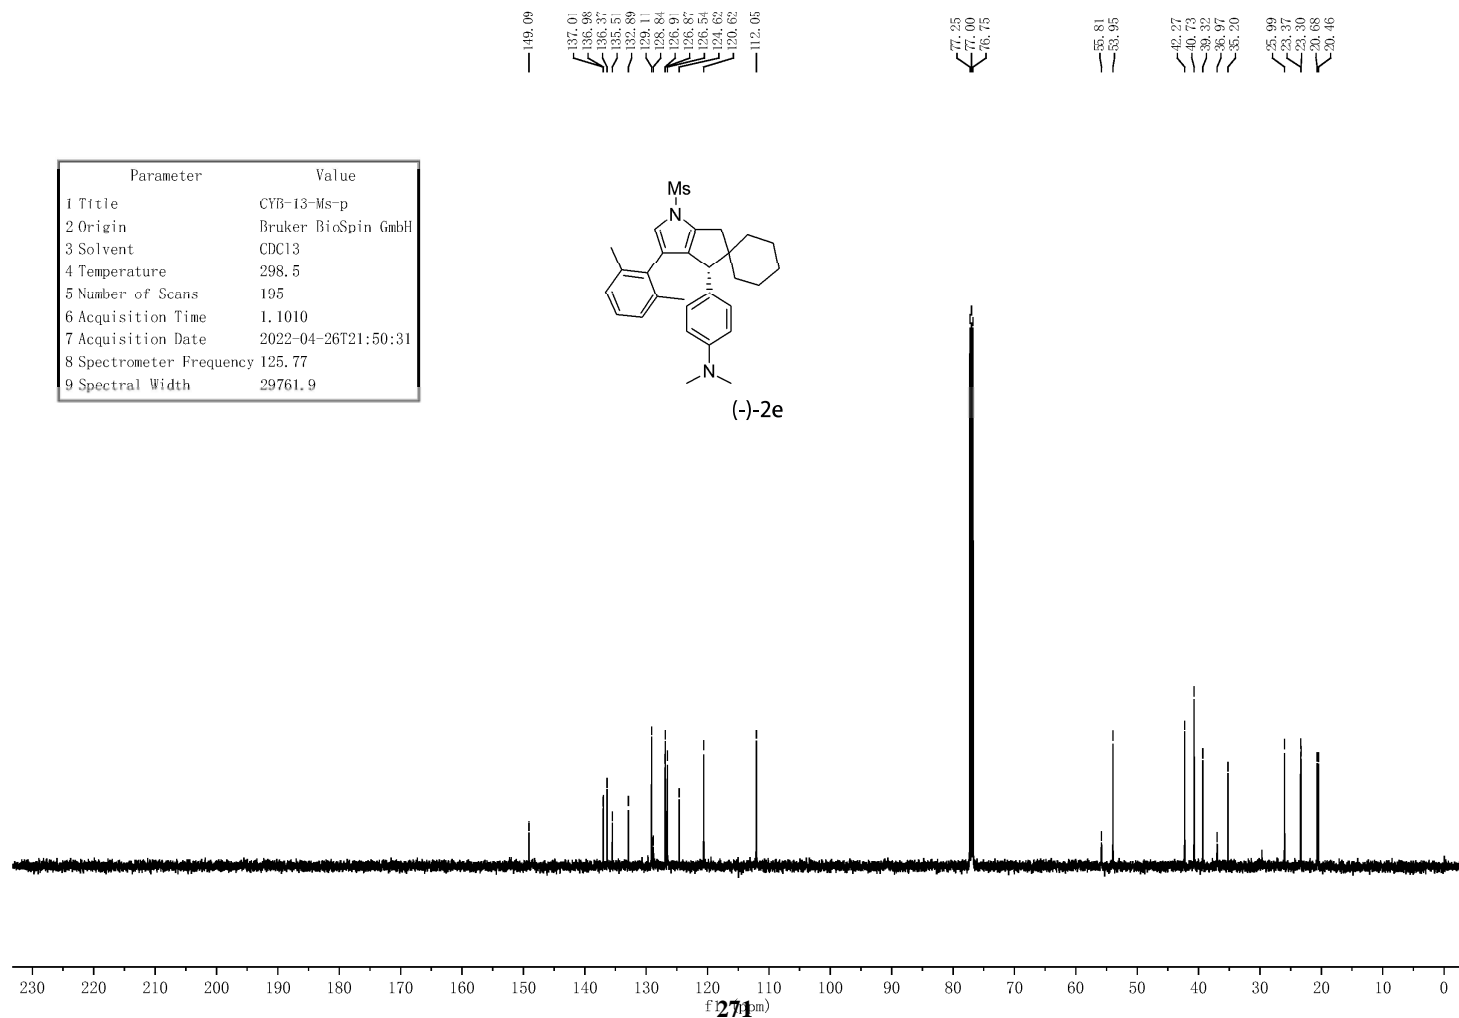

Supplementary Figure 171.  $^1\text{H}$  and  $^{13}\text{C}$  NMR spectra for (-)-2e

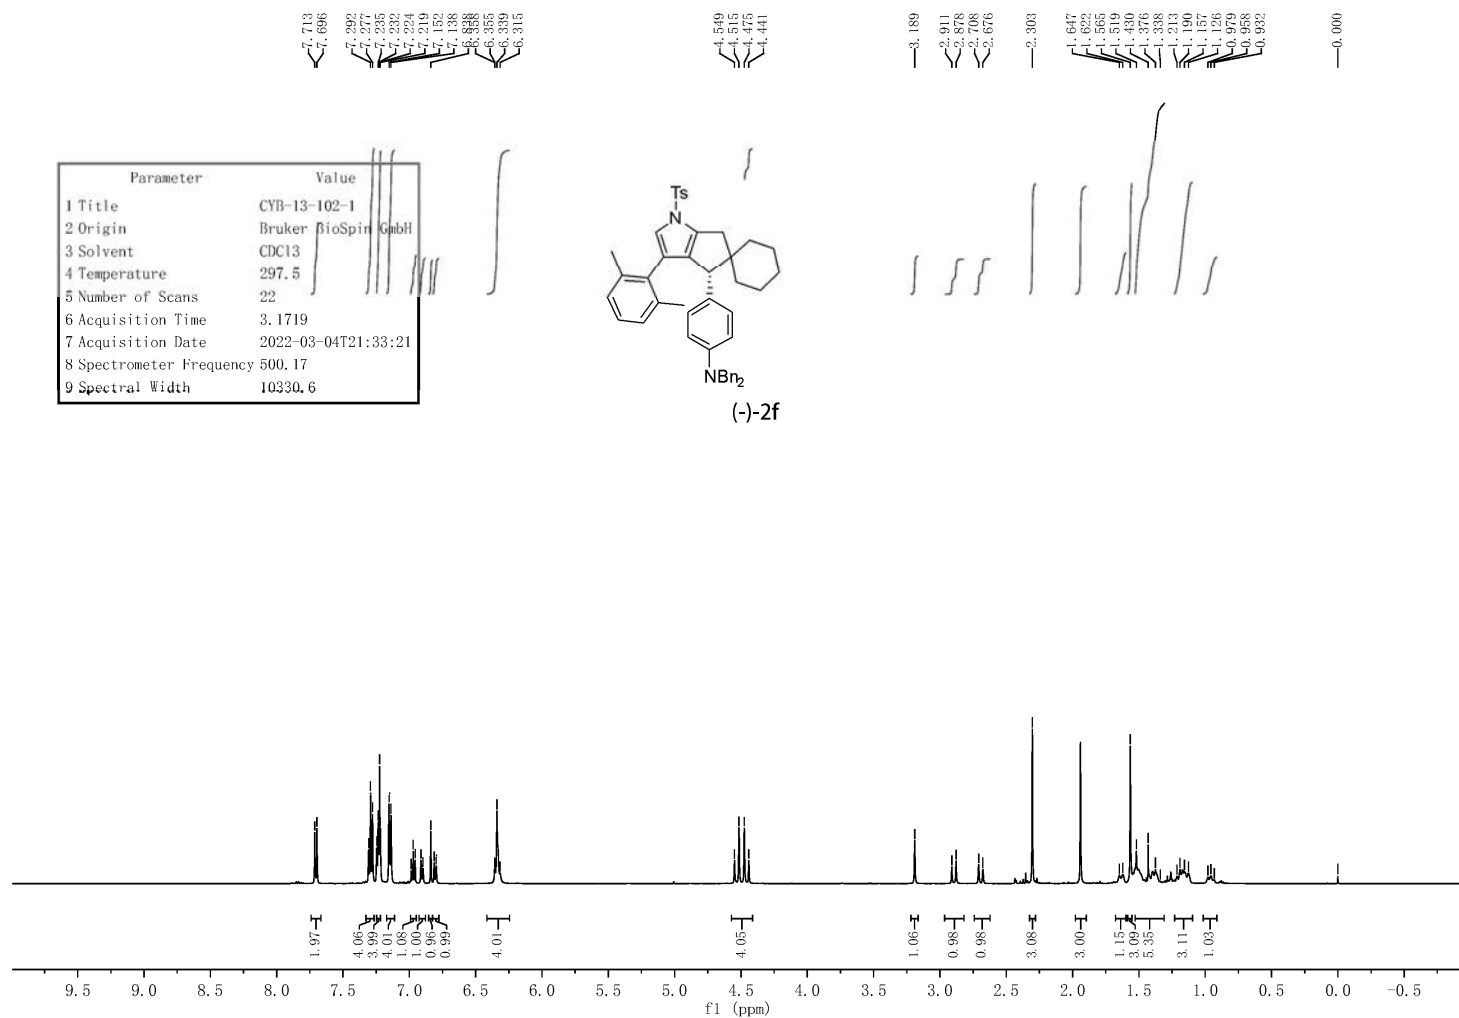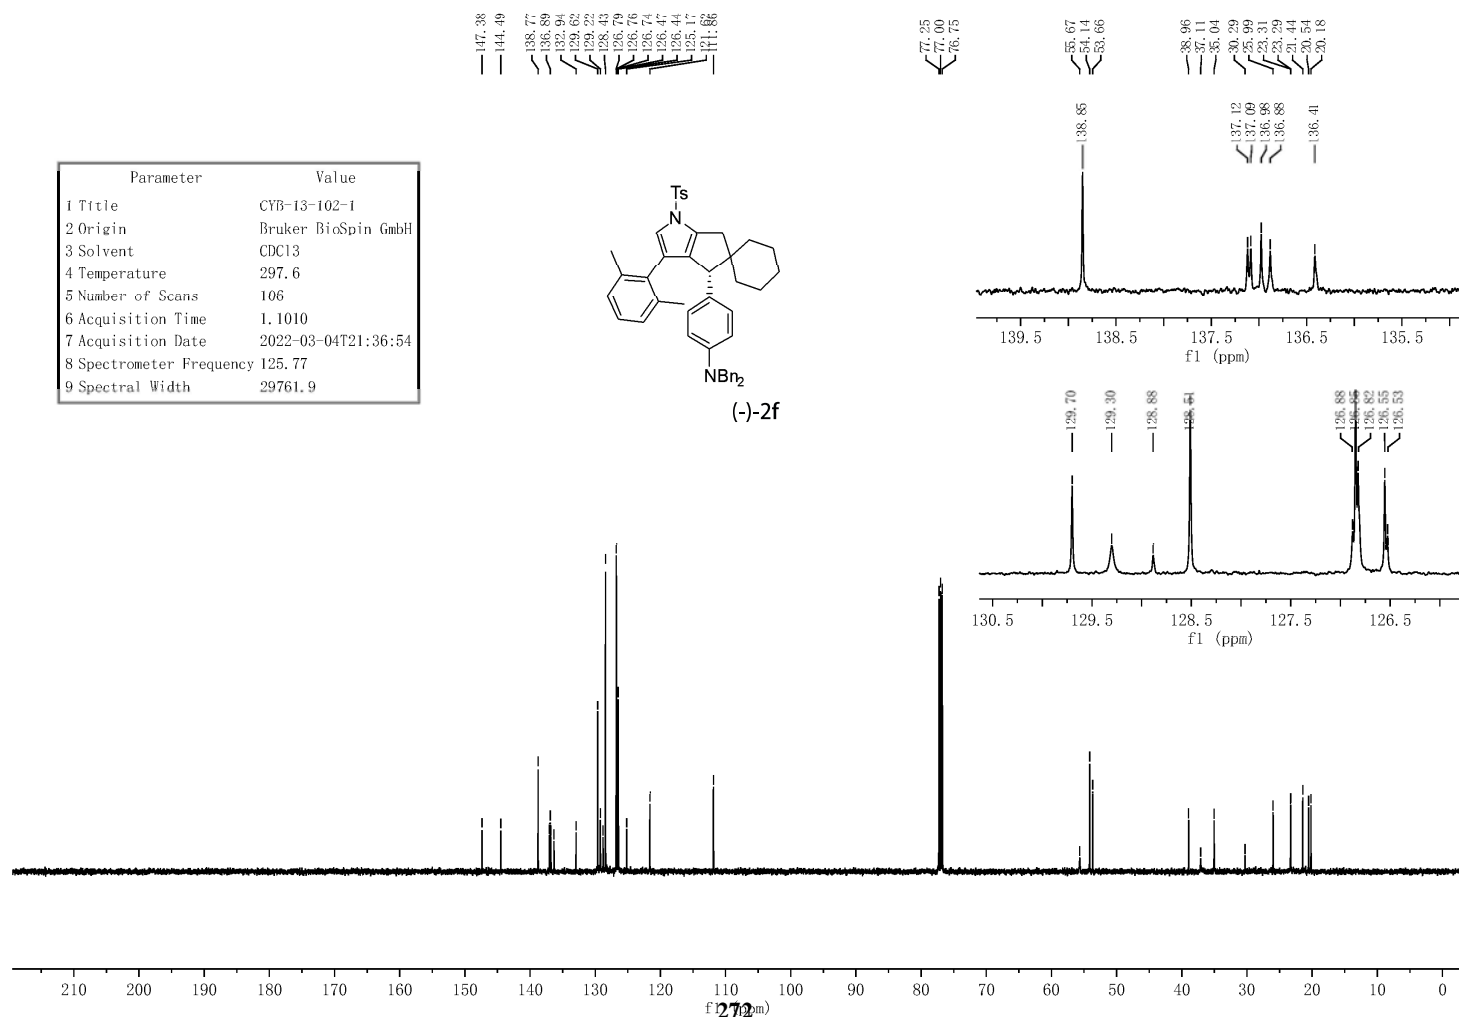

Supplementary Figure 172. <sup>1</sup>H and <sup>13</sup>C NMR spectra for (-)-2f



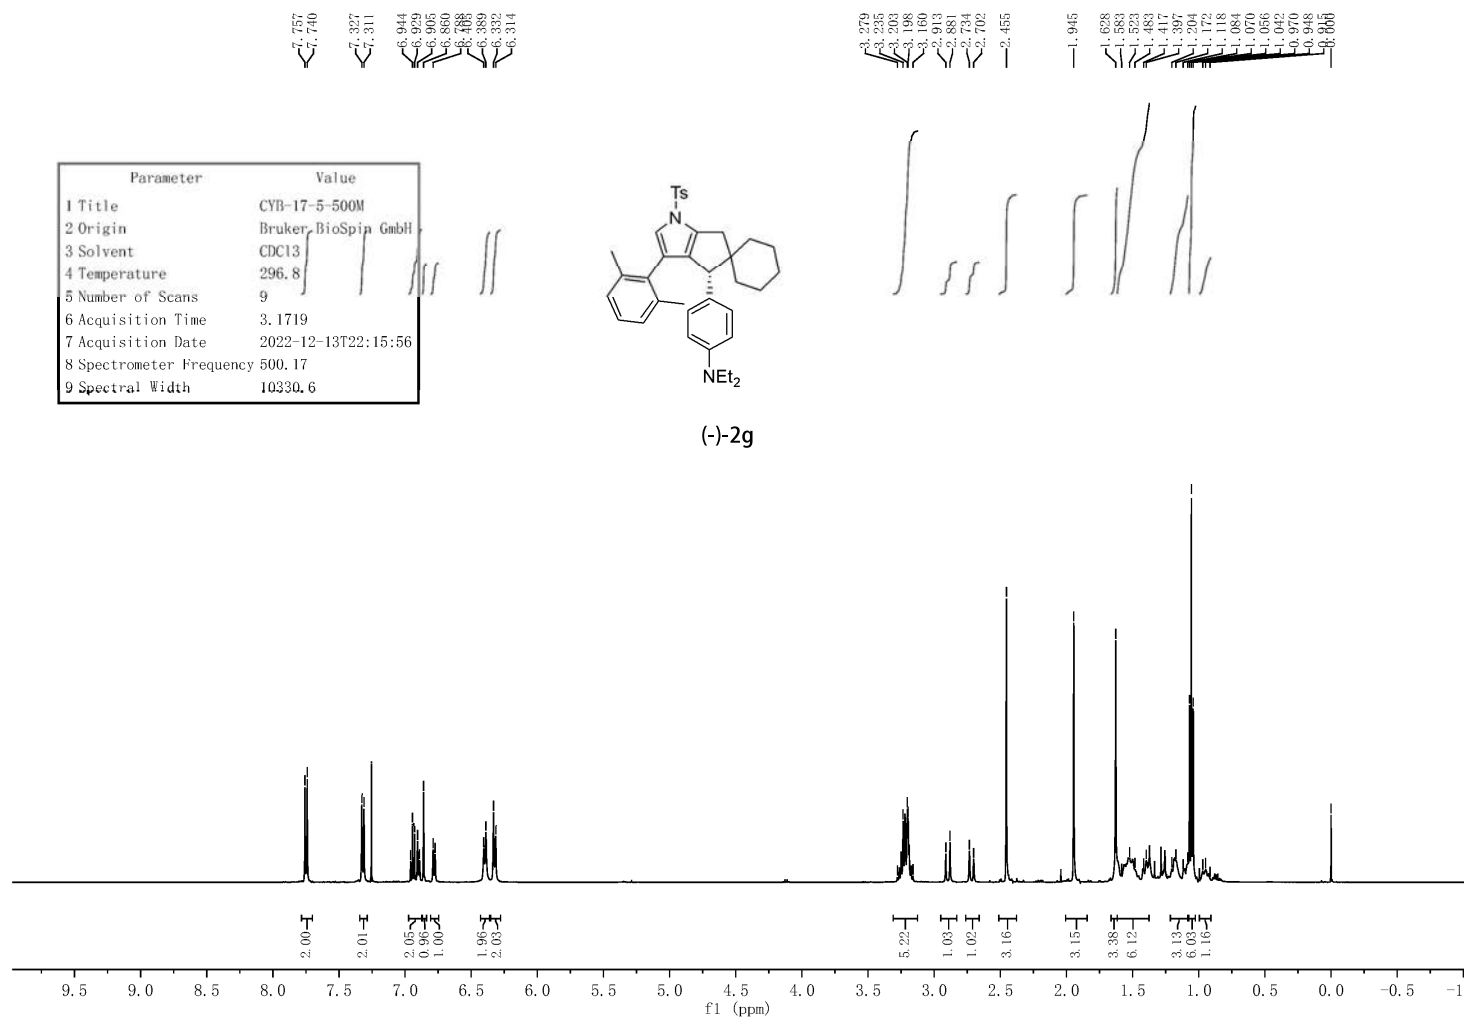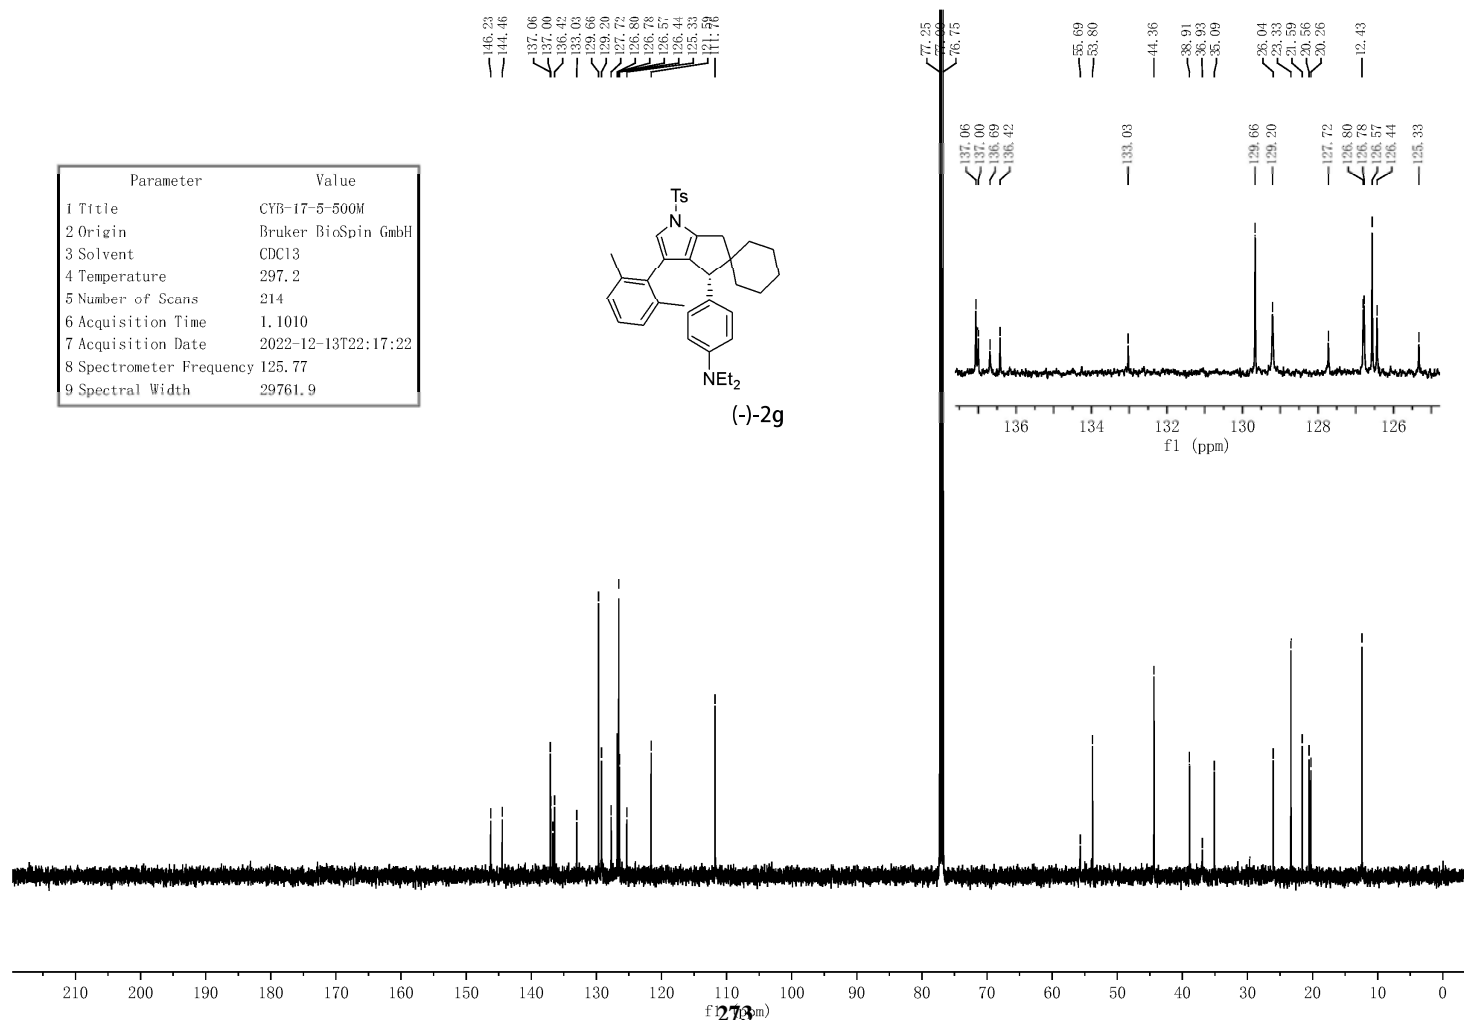

Supplementary Figure 173. <sup>1</sup>H and <sup>13</sup>C NMR spectra for (-)-2g

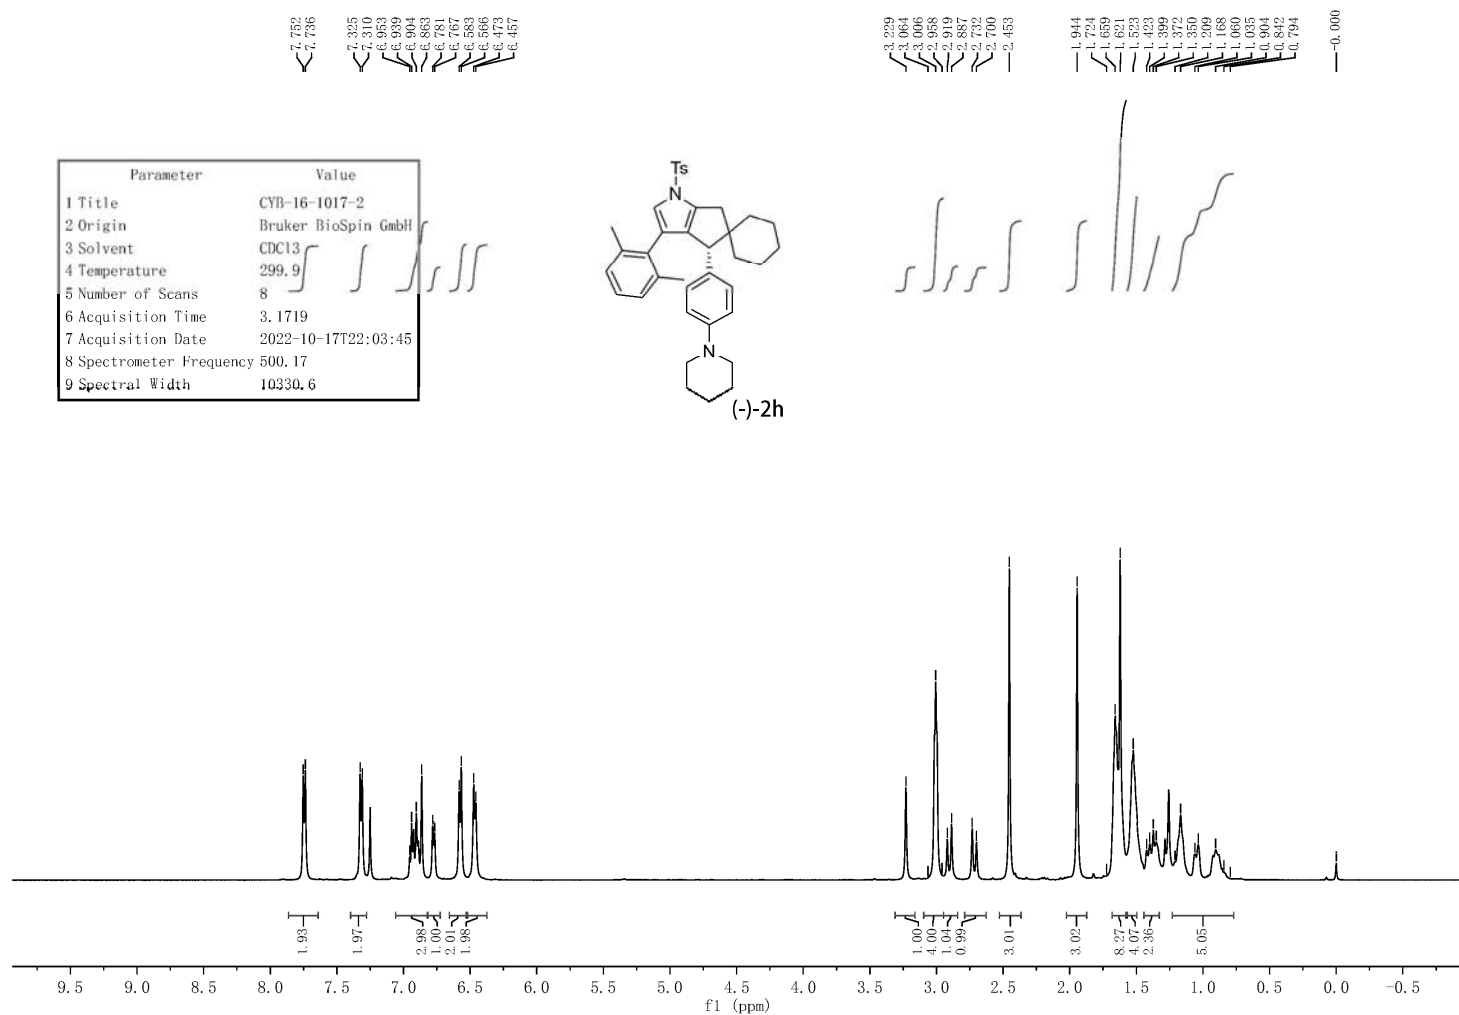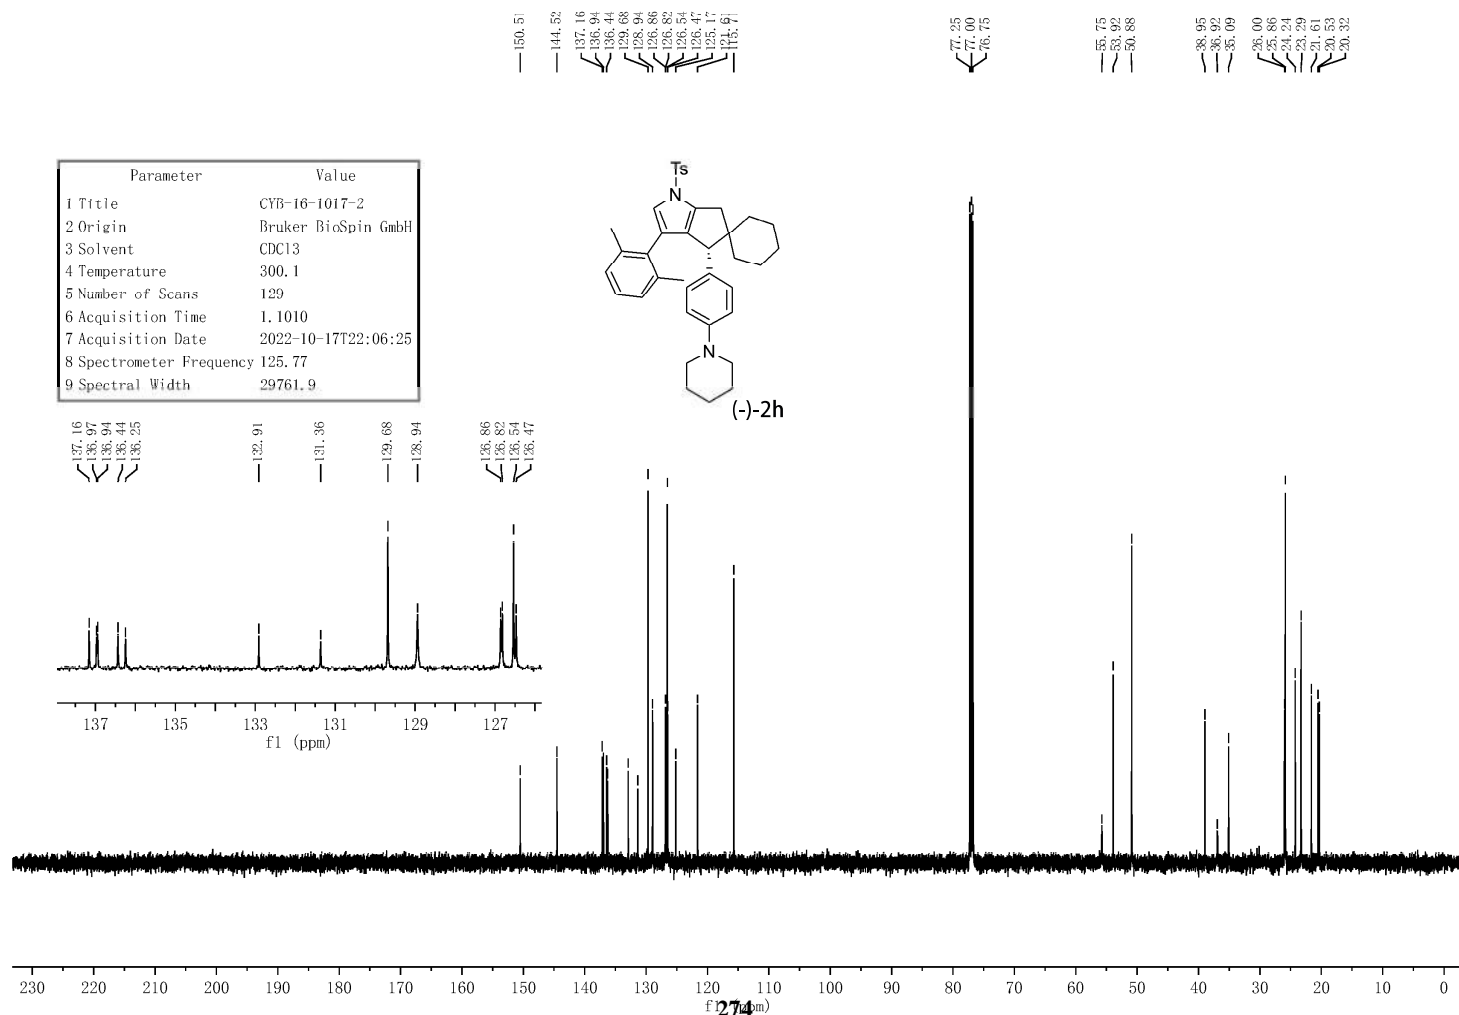

Supplementary Figure 174. <sup>1</sup>H and <sup>13</sup>C NMR spectra for (-)-2h

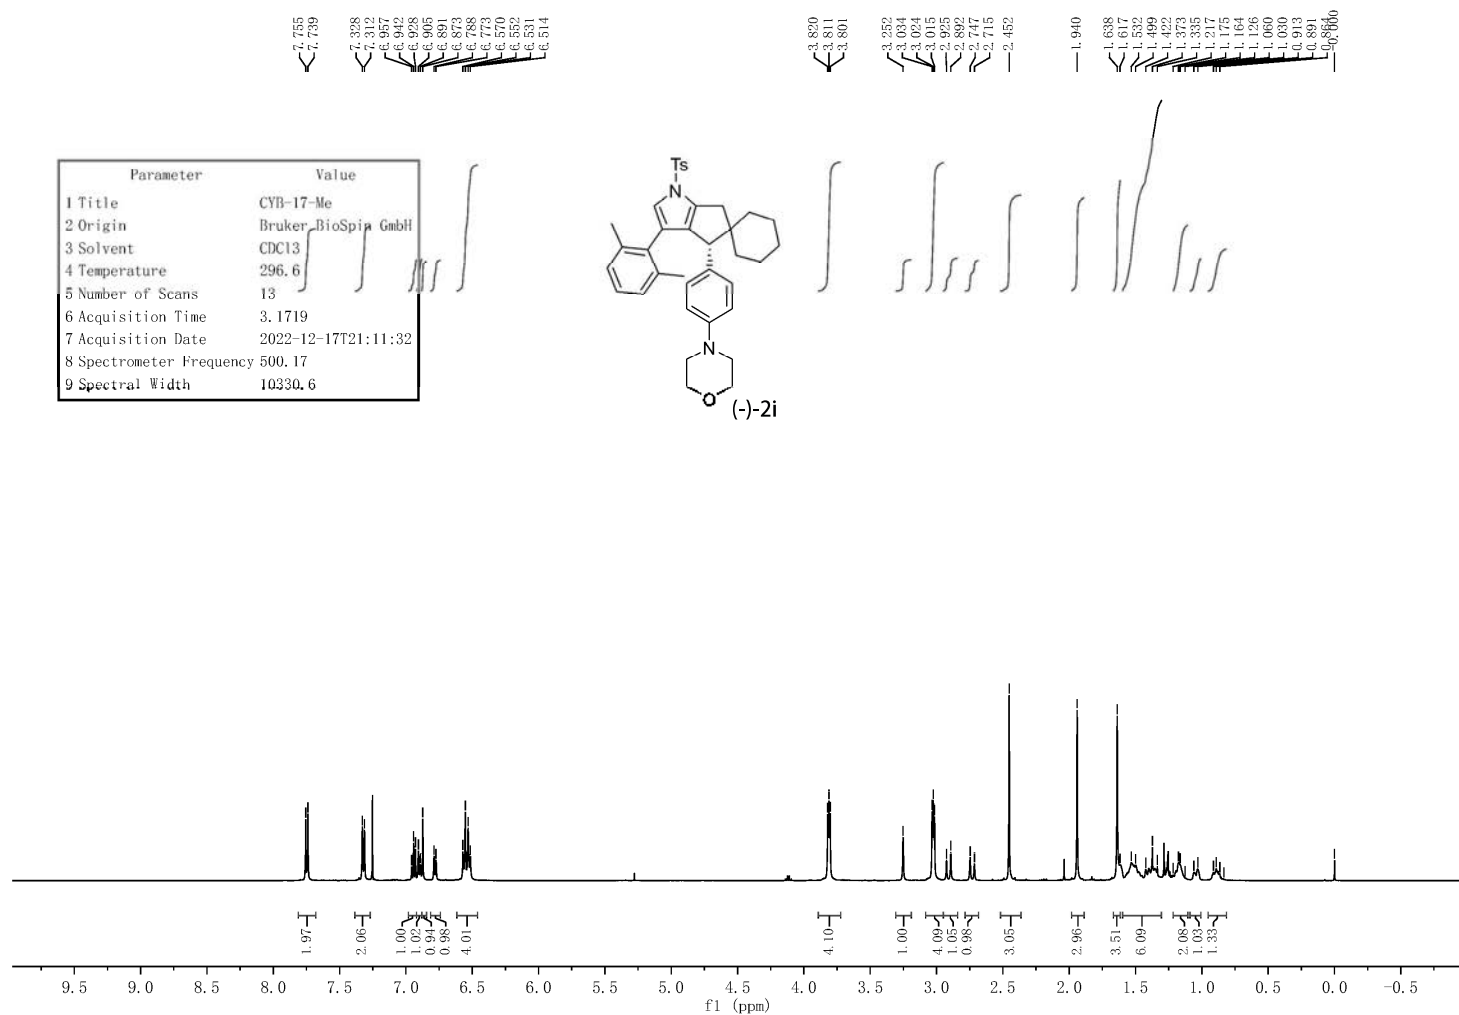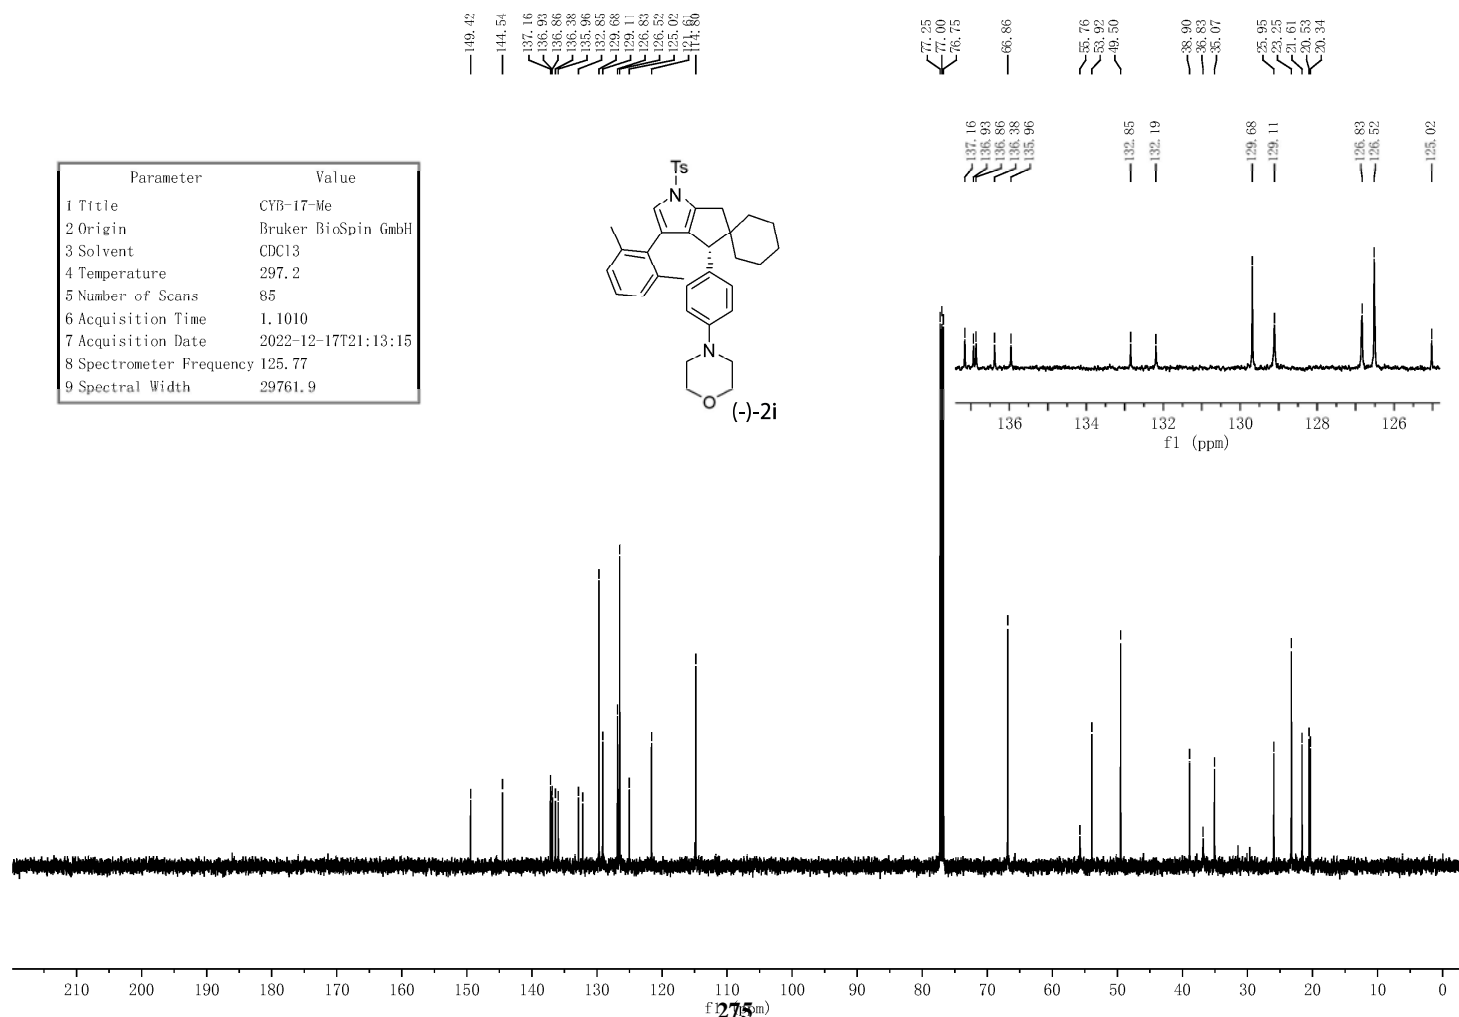

Supplementary Figure 175. <sup>1</sup>H and <sup>13</sup>C NMR spectra for (-)-2i

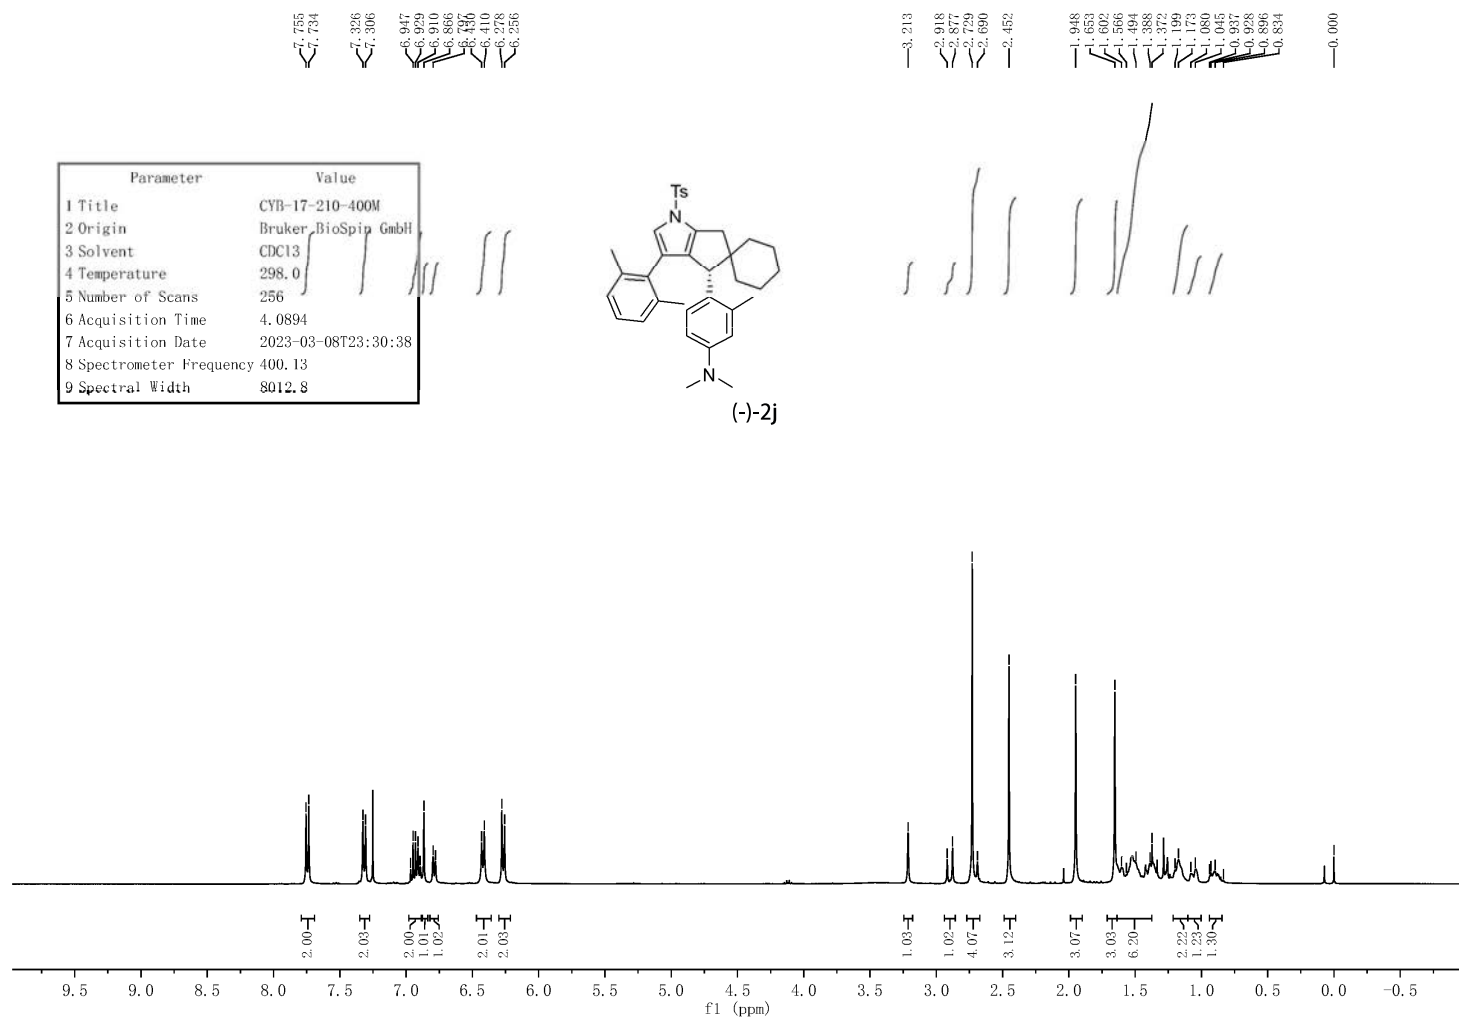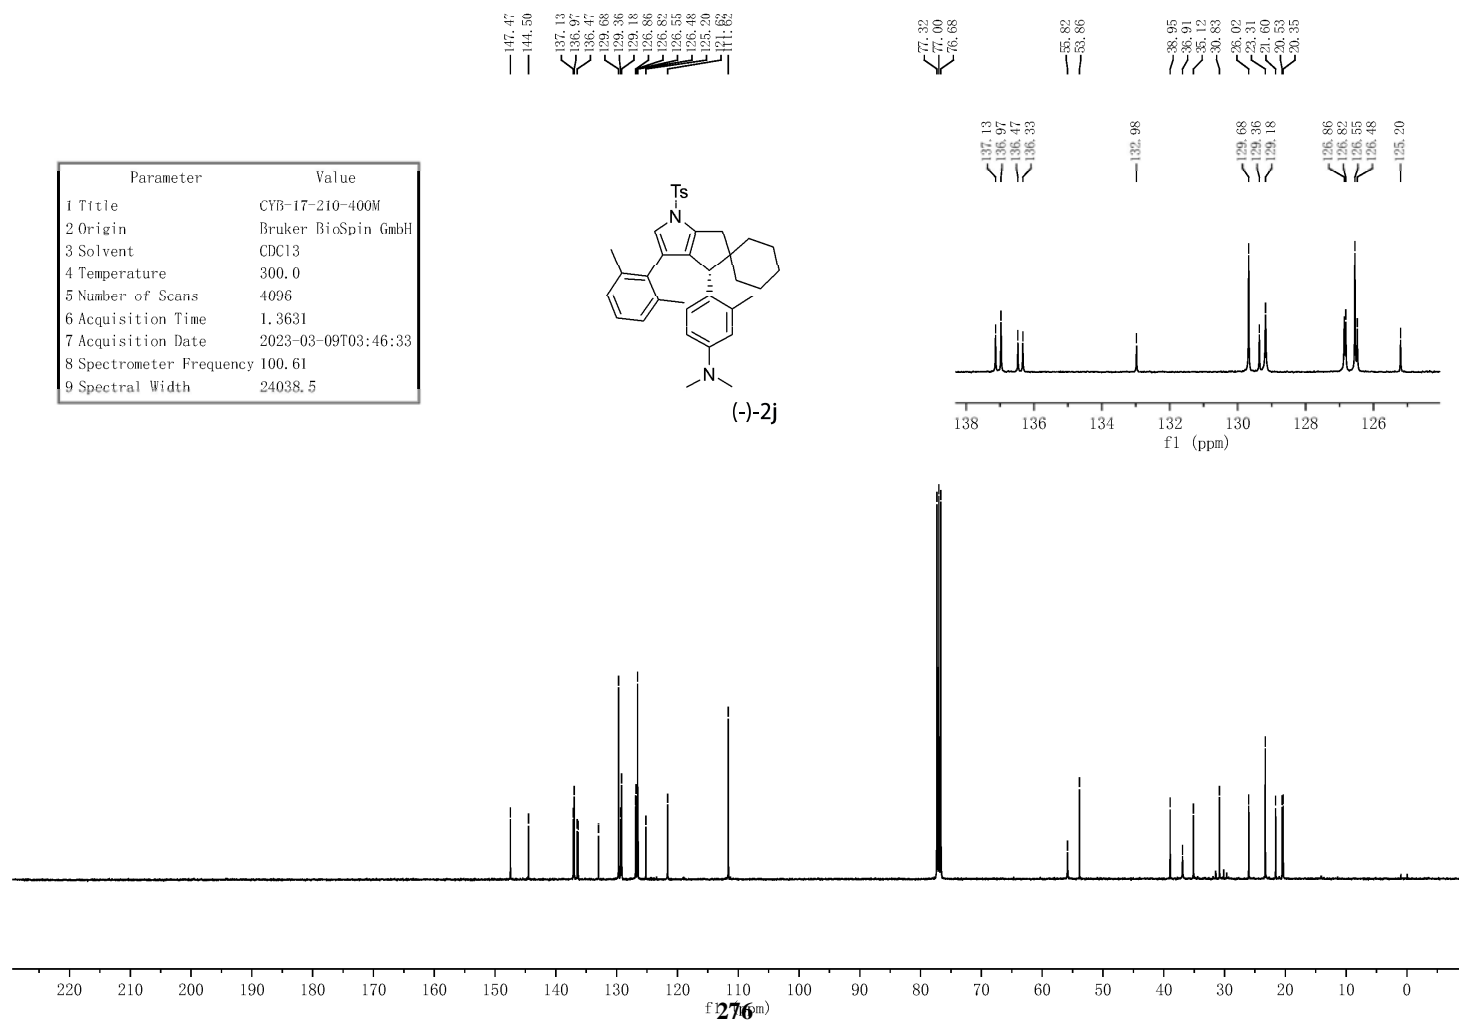

Supplementary Figure 176.  $^1\text{H}$  and  $^{13}\text{C}$  NMR spectra for (-)-2j

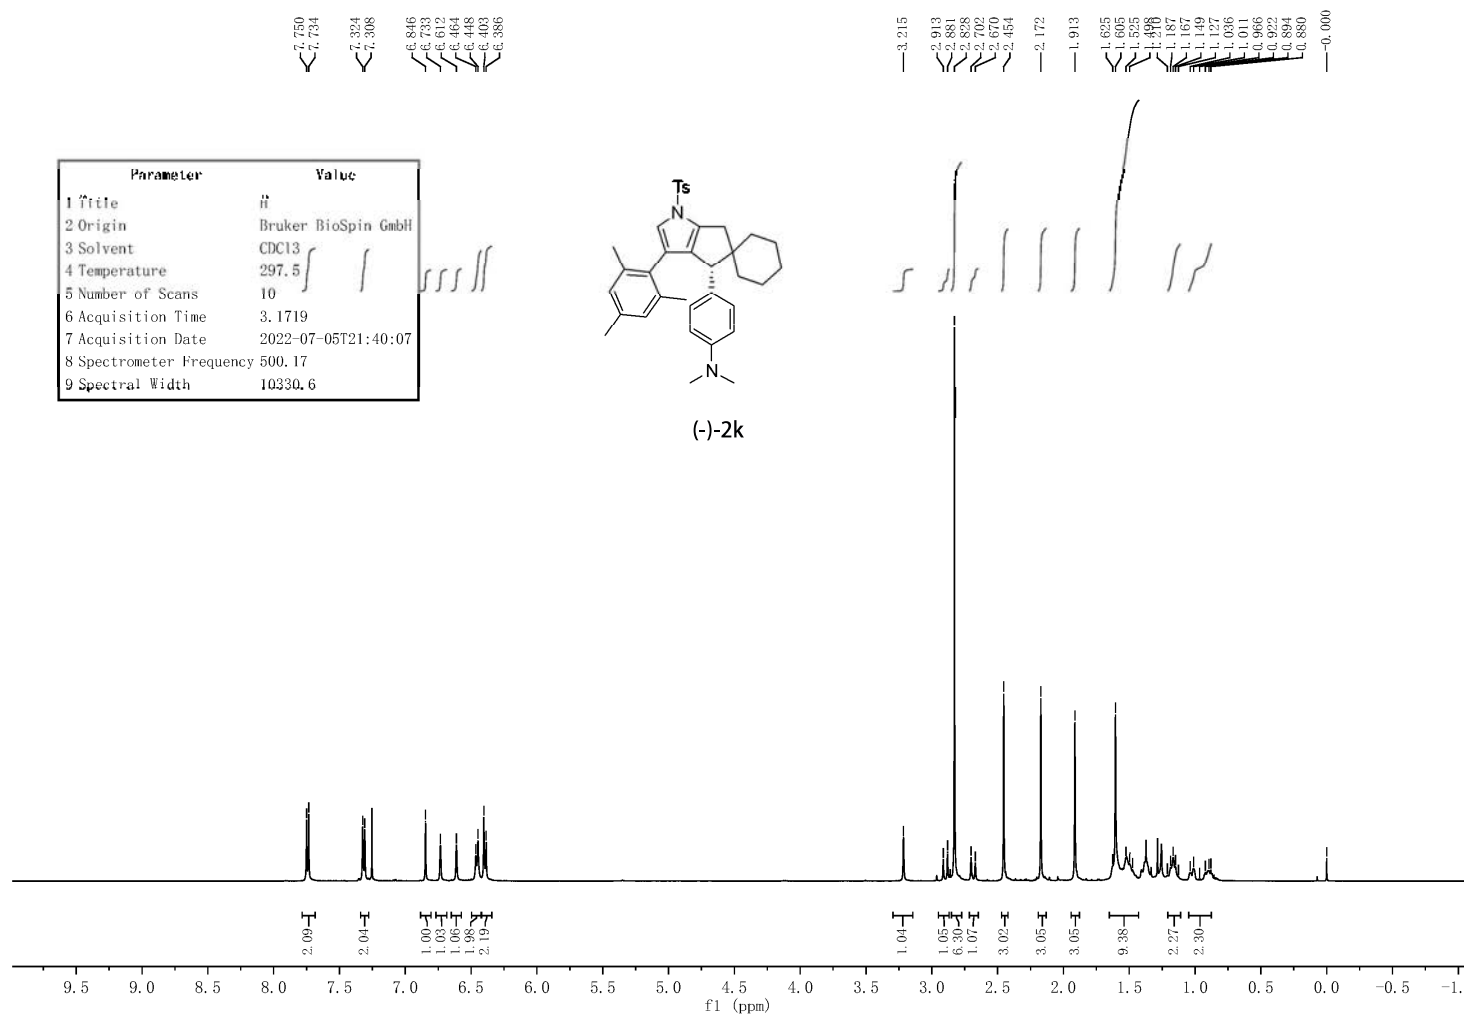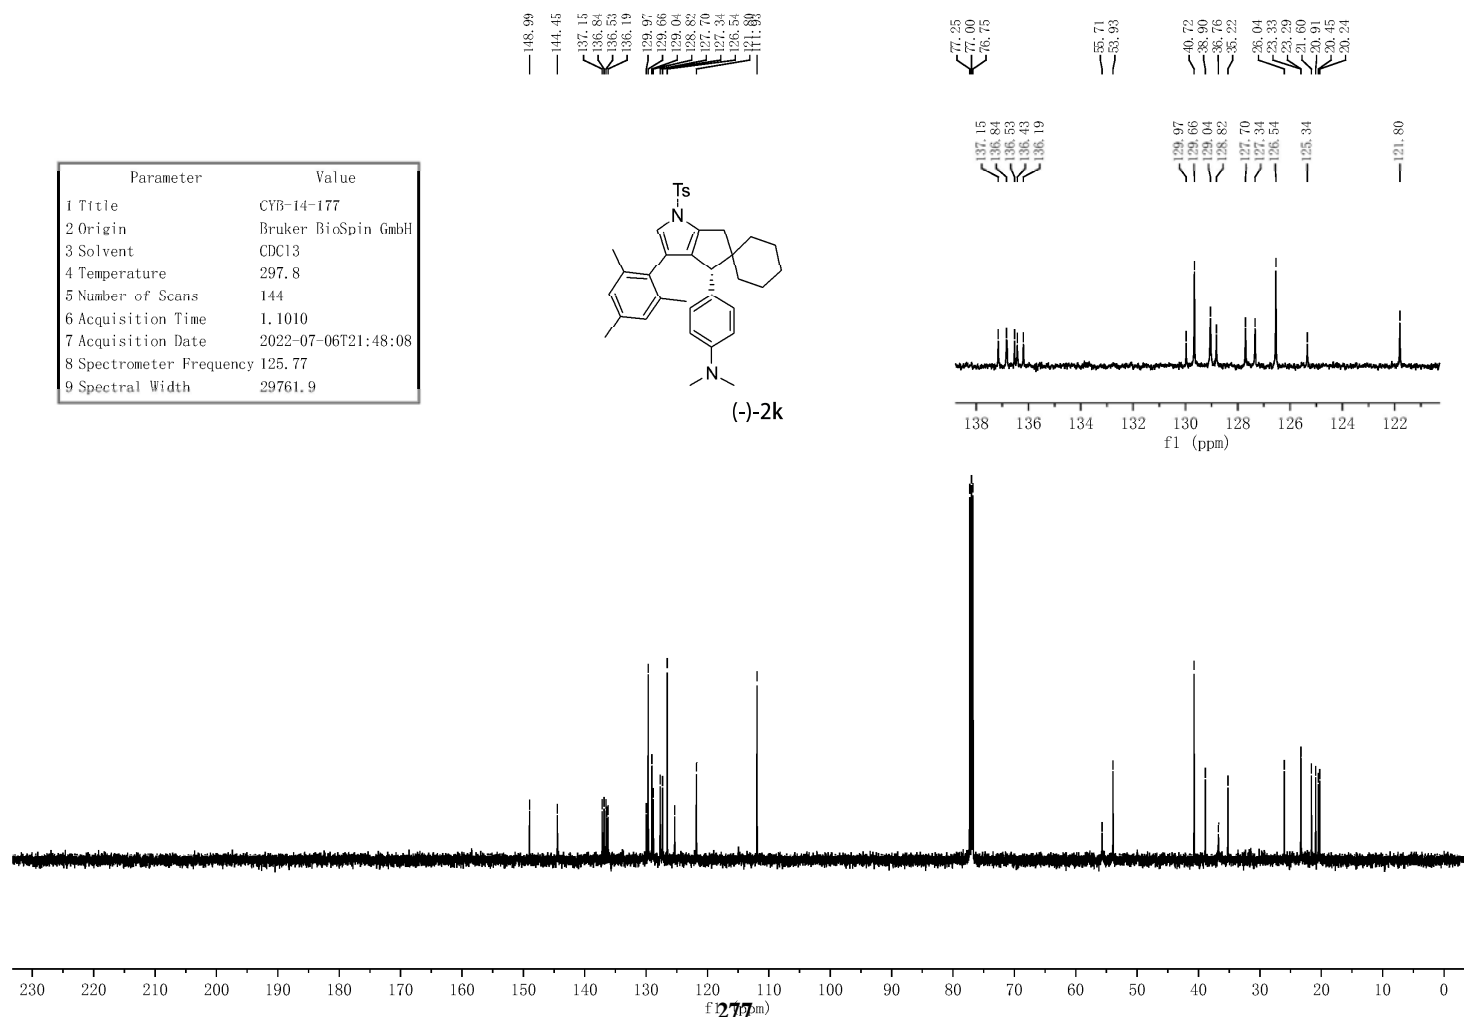

Supplementary Figure 177.  $^1\text{H}$  and  $^{13}\text{C}$  NMR spectra for (-)-2k

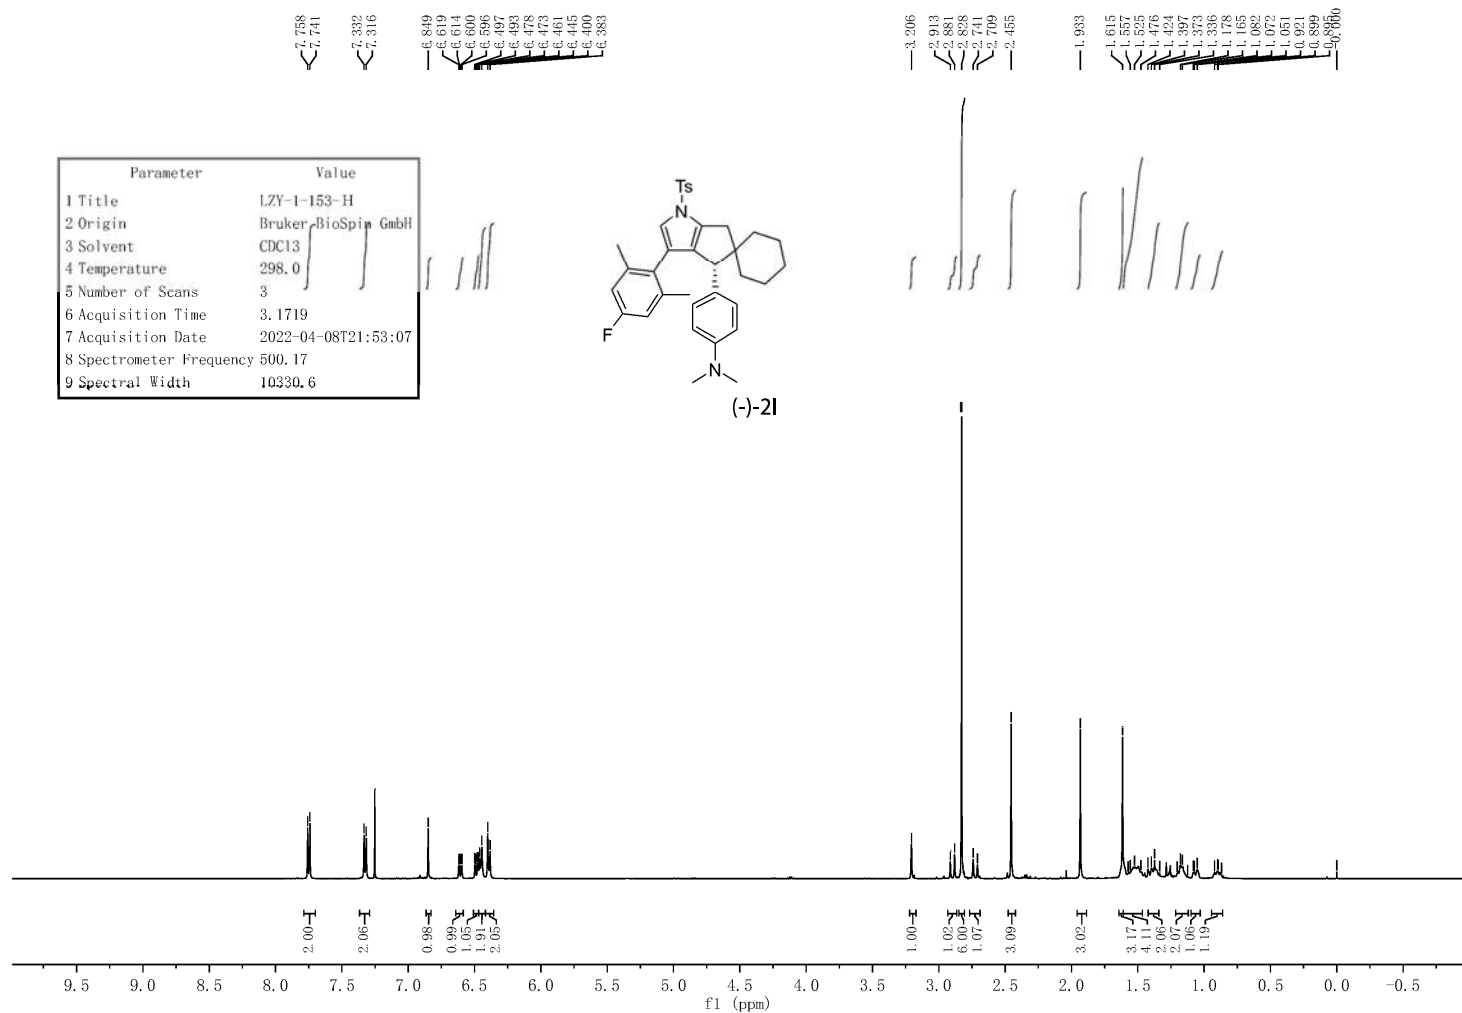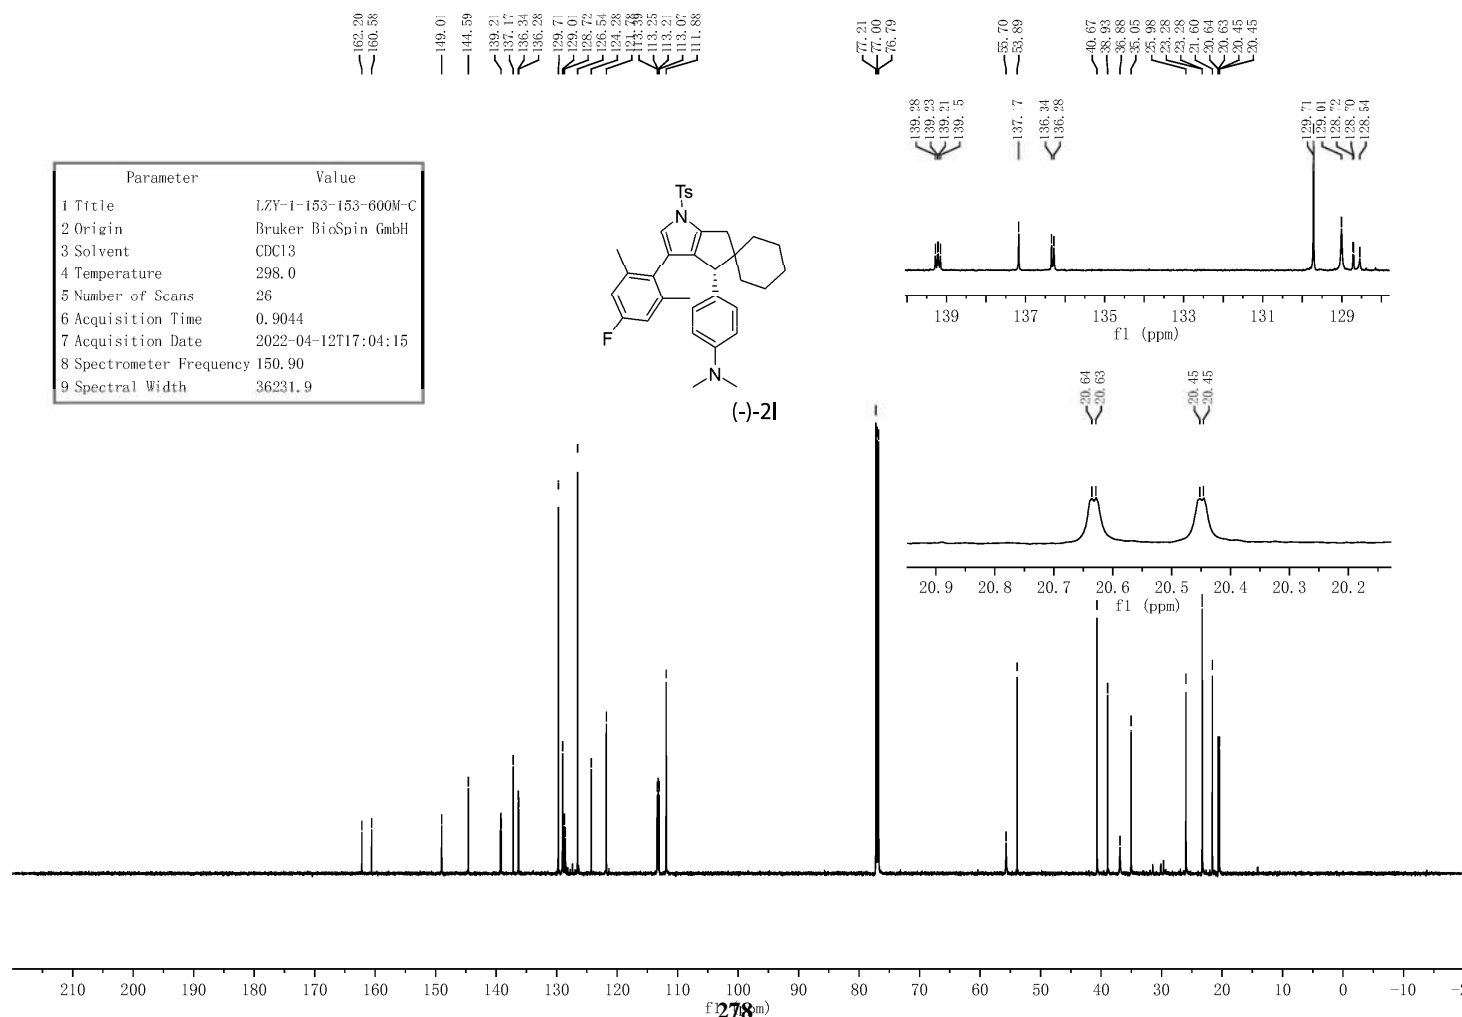

Supplementary Figure 178.  $^1\text{H}$  and  $^{13}\text{C}$  NMR spectra for (-)-21

| Parameter                | Value               |
|--------------------------|---------------------|
| 1 Title                  | CYB-20230626-F      |
| 2 Origin                 | Bruker BioSpin GmbH |
| 3 Solvent                | CDCl3               |
| 4 Temperature            | 295.6               |
| 5 Number of Scans        | 26                  |
| 6 Acquisition Time       | 0.7340              |
| 7 Acquisition Date       | 2023-06-26T17:14:42 |
| 8 Spectrometer Frequency | 376.31              |
| 9 Spectral Width         | 89285.7             |

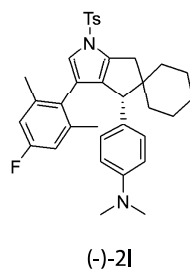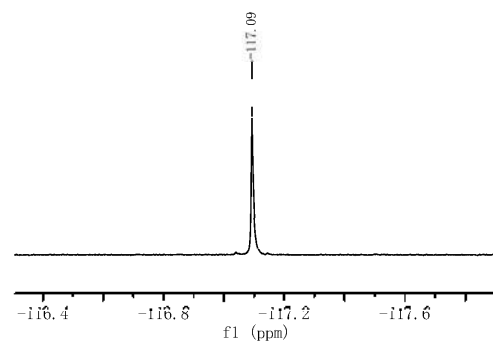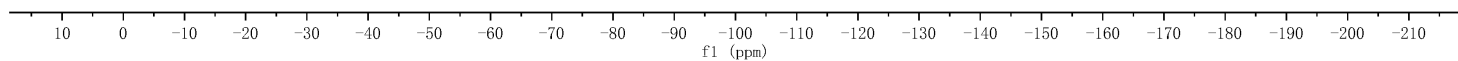

Supplementary Figure 179. <sup>19</sup>F NMR spectra for (-)-2l

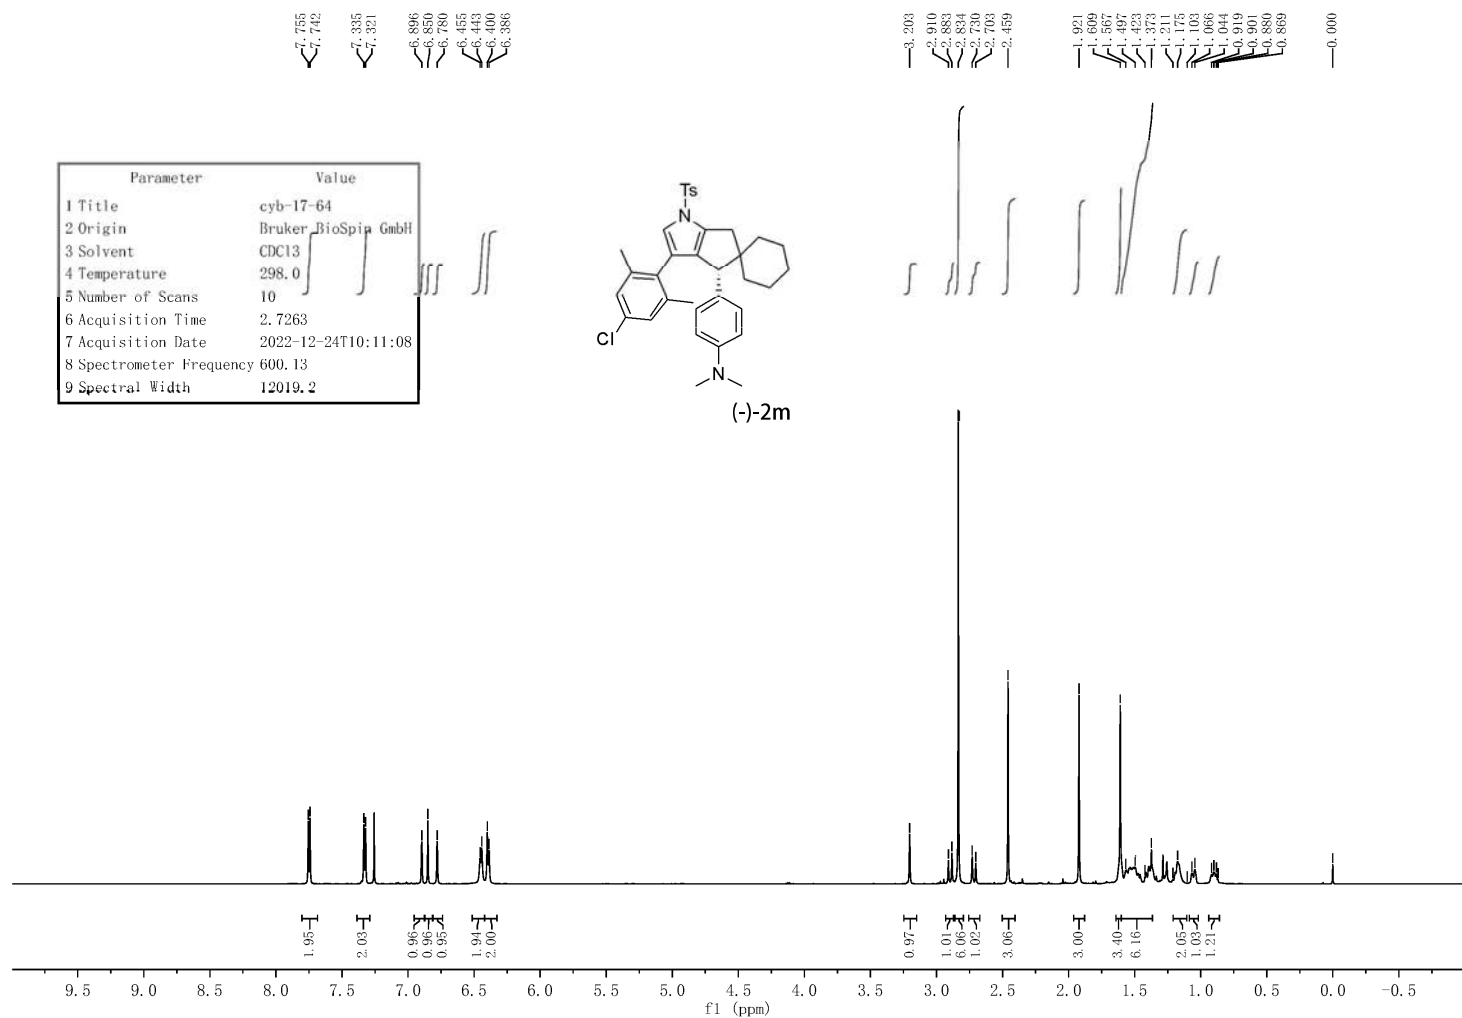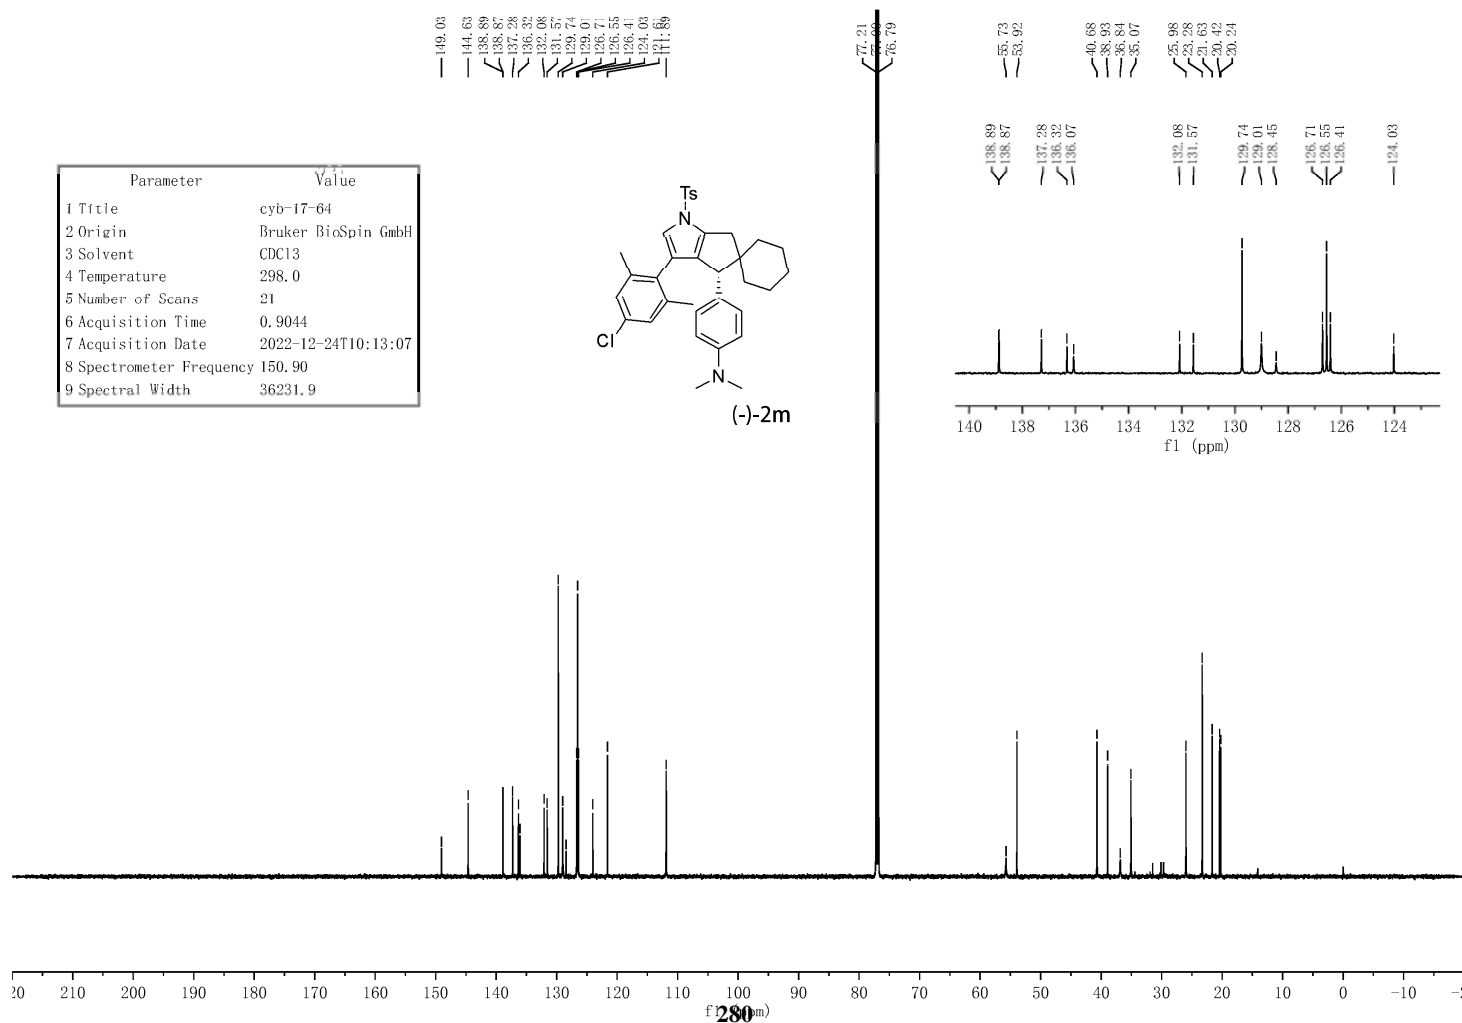

Supplementary Figure 180.  $^1\text{H}$  and  $^{13}\text{C}$  NMR spectra for (-)-2m



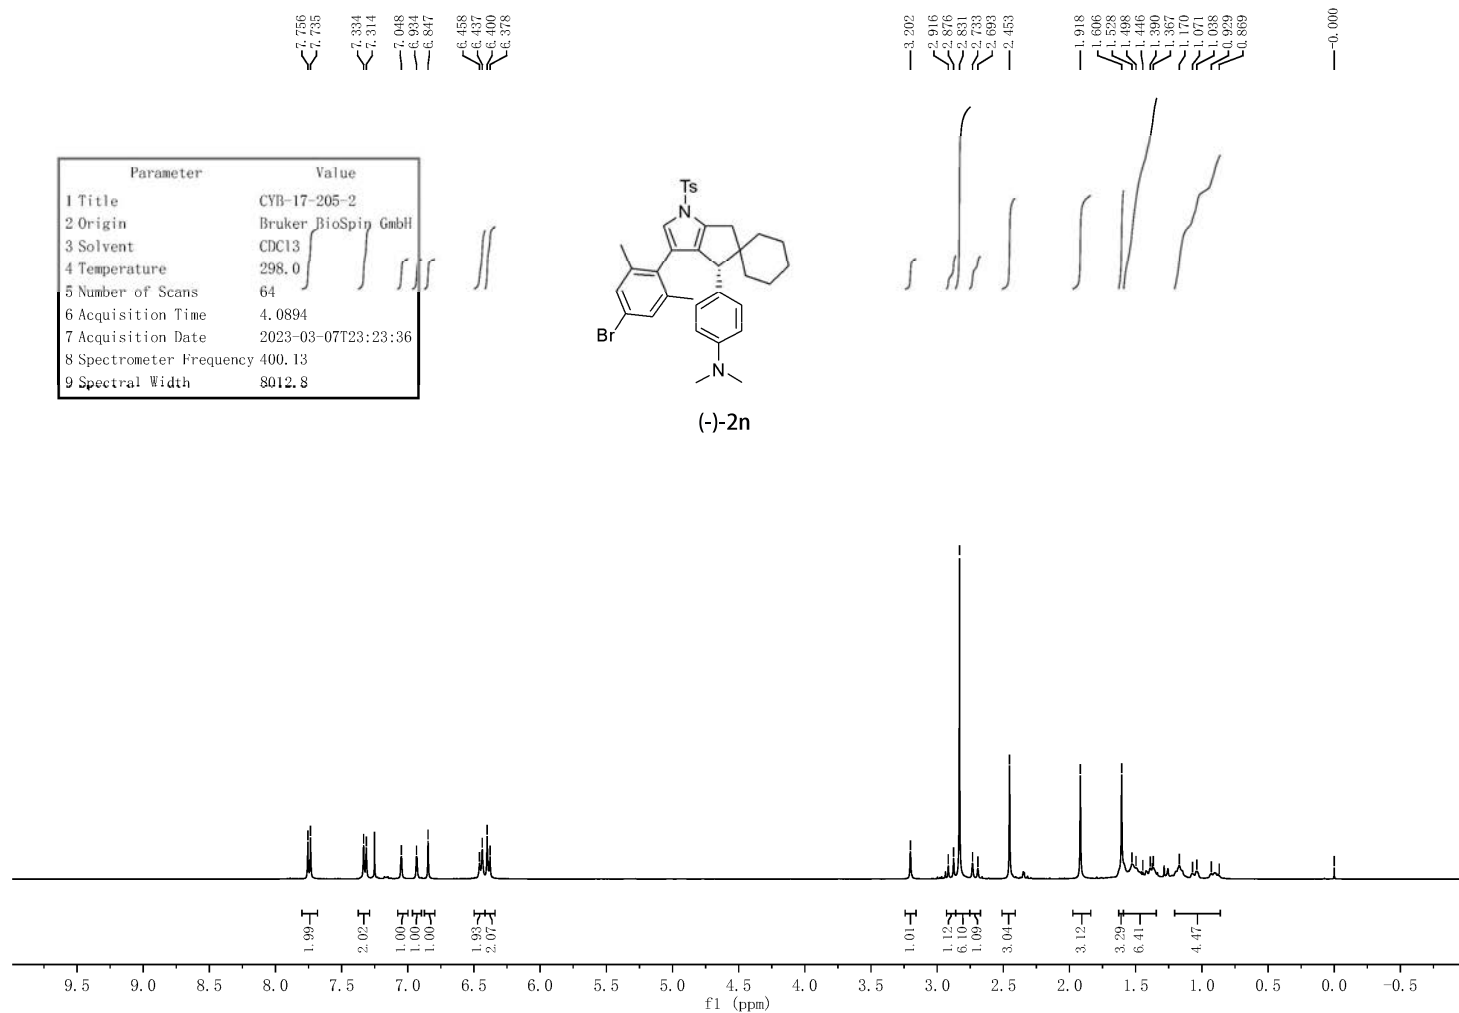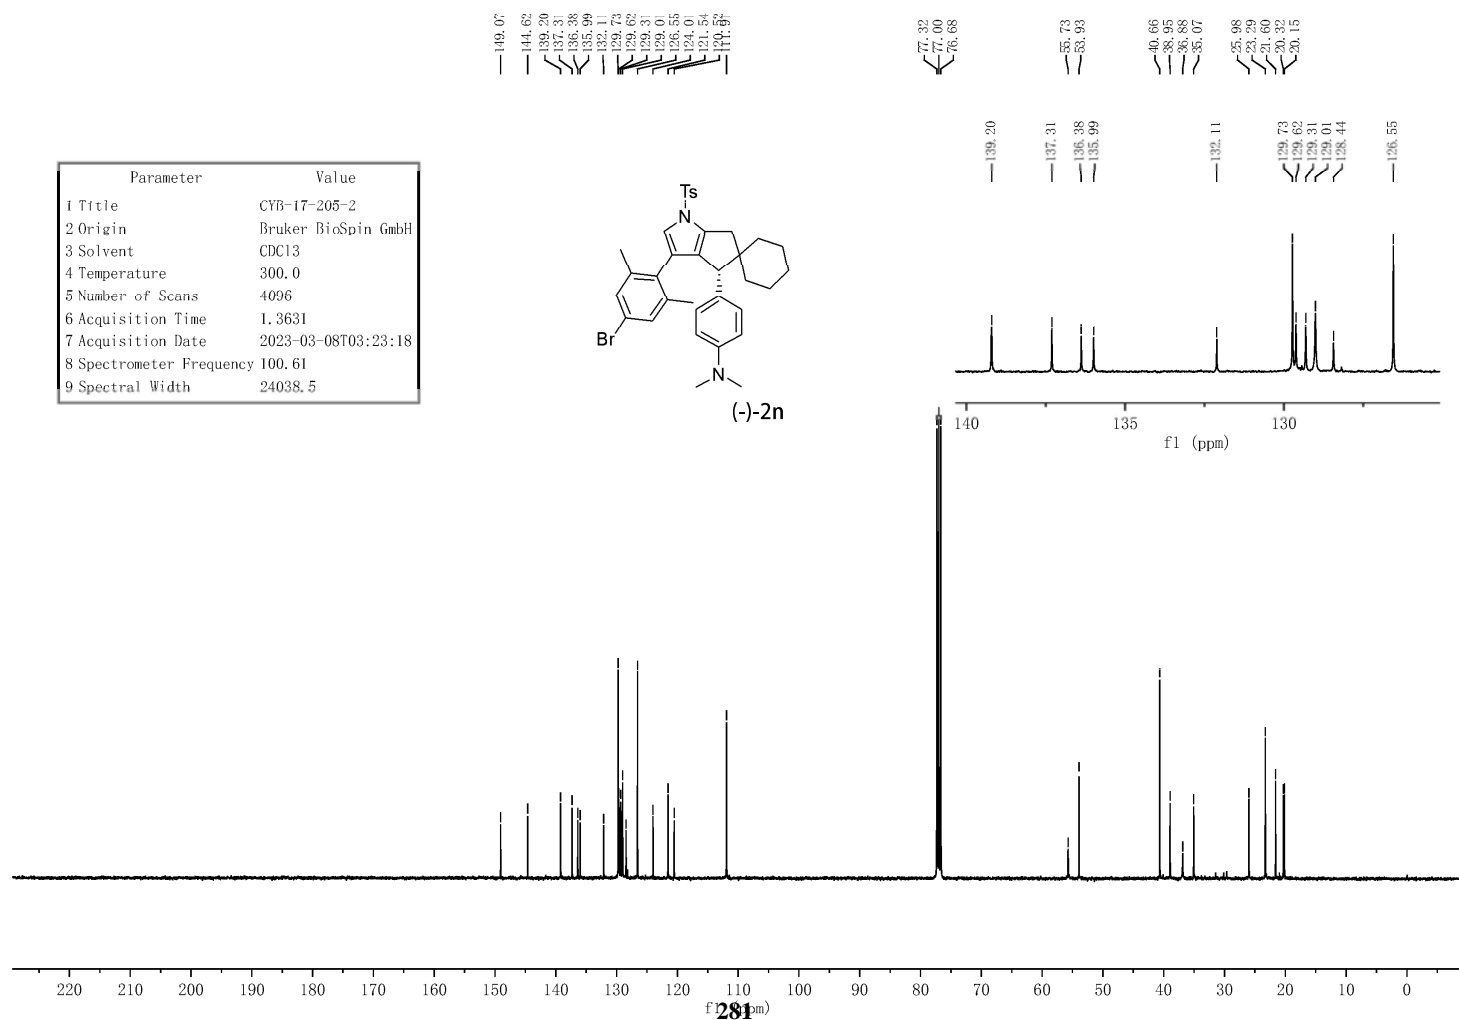

Supplementary Figure 181.  $^1\text{H}$  and  $^{13}\text{C}$  NMR spectra for (-)-2n

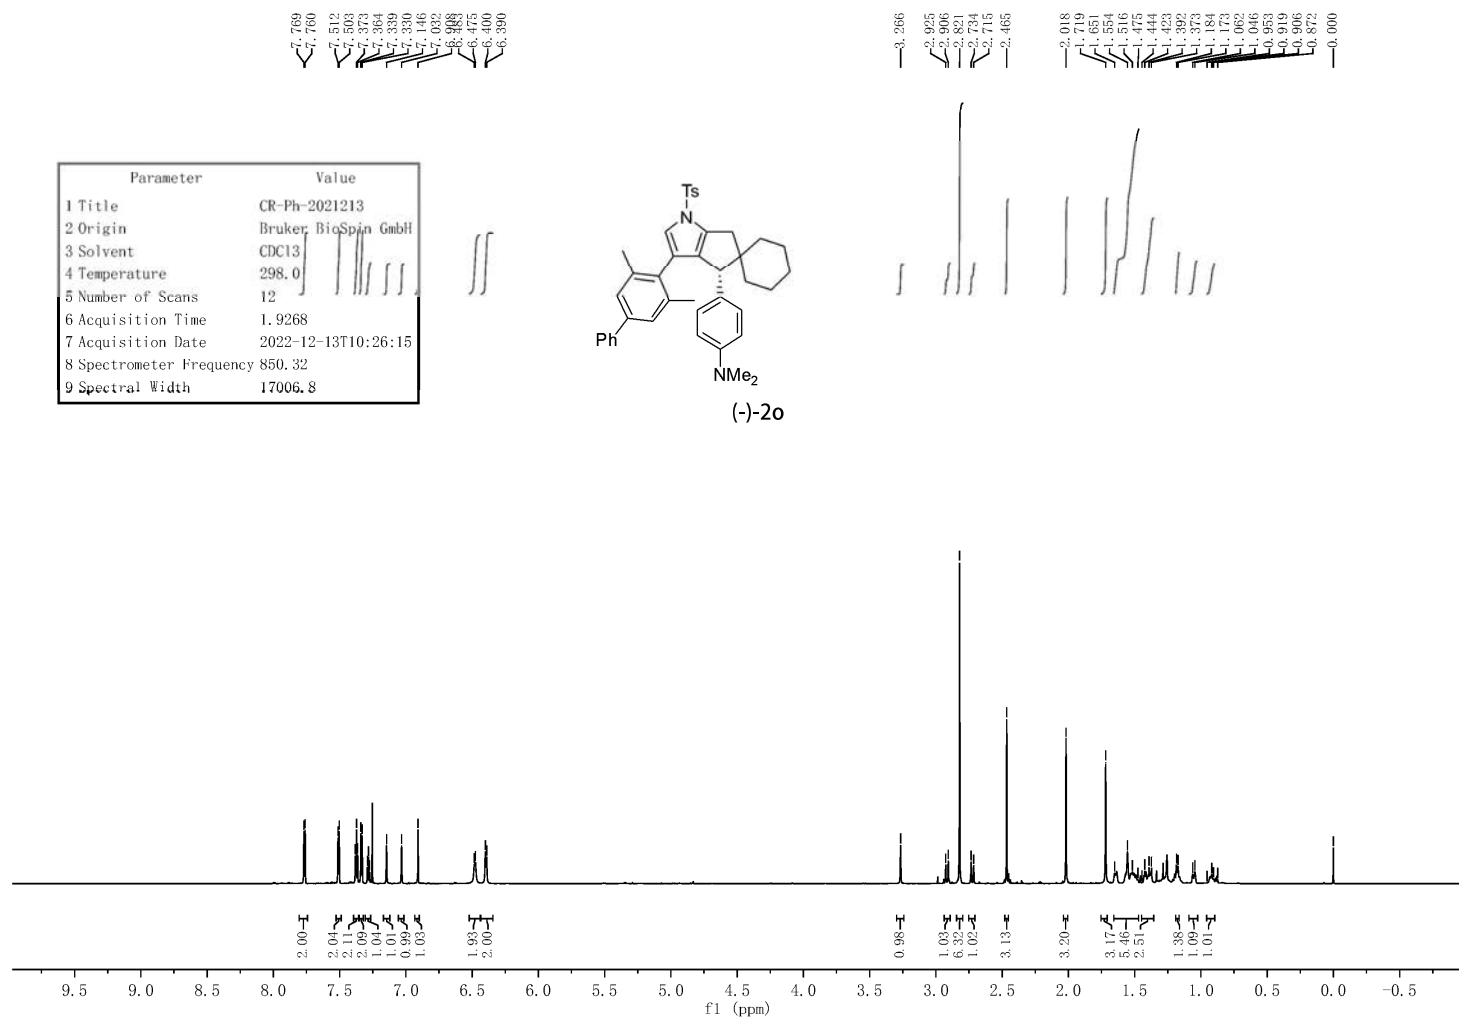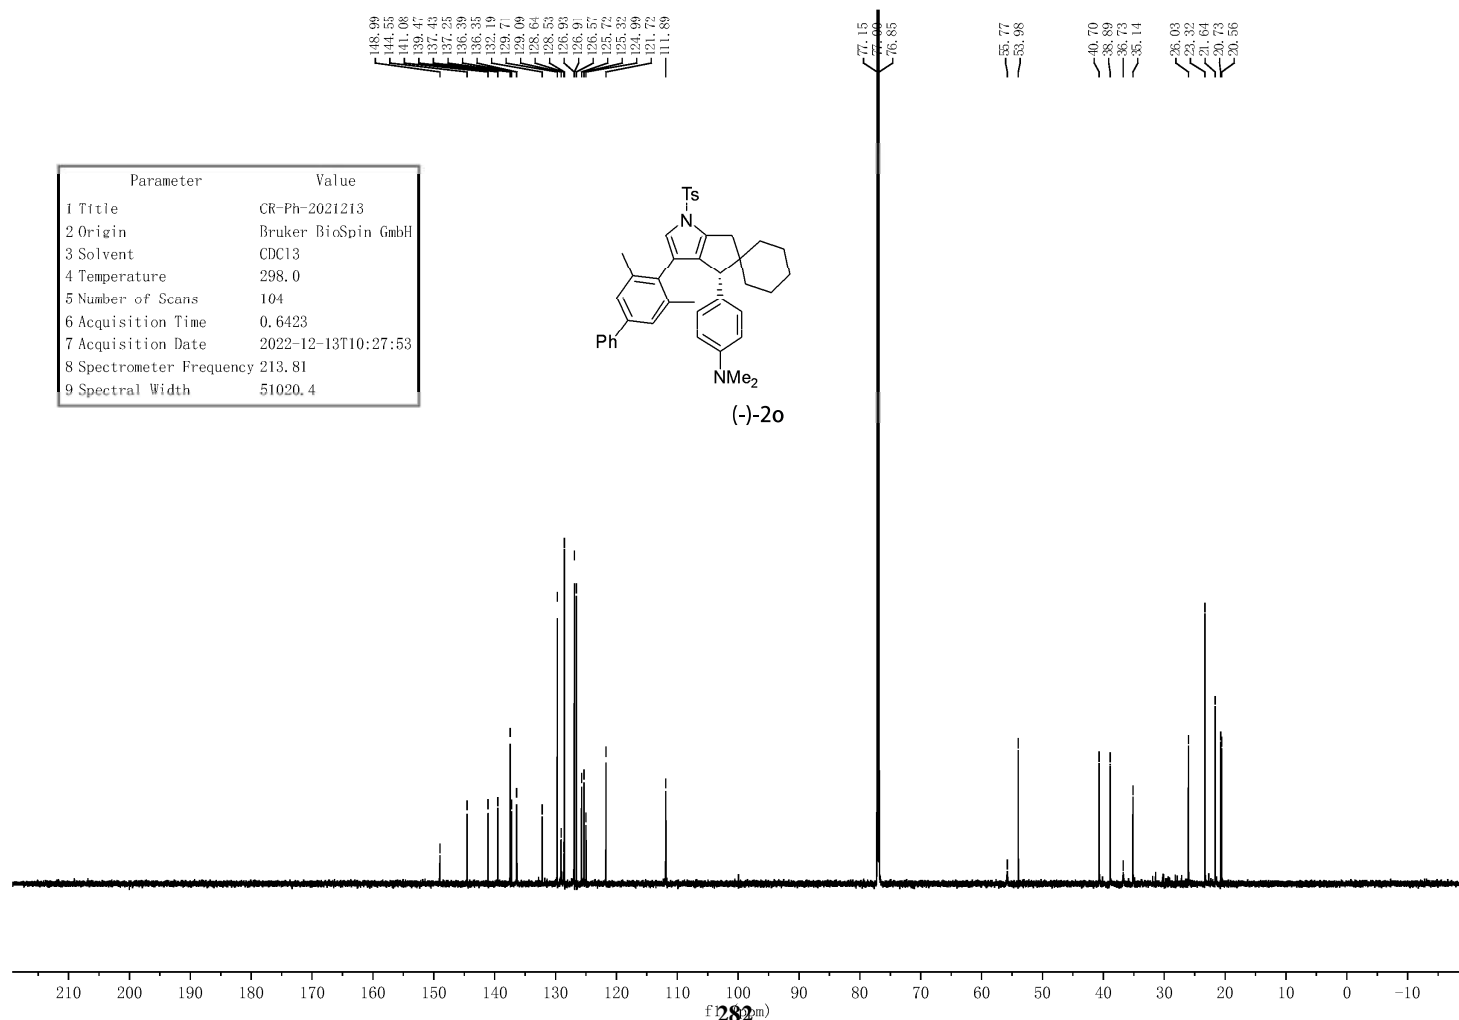

Supplementary Figure 182.  $^1\text{H}$  and  $^{13}\text{C}$  NMR spectra for (-)-20

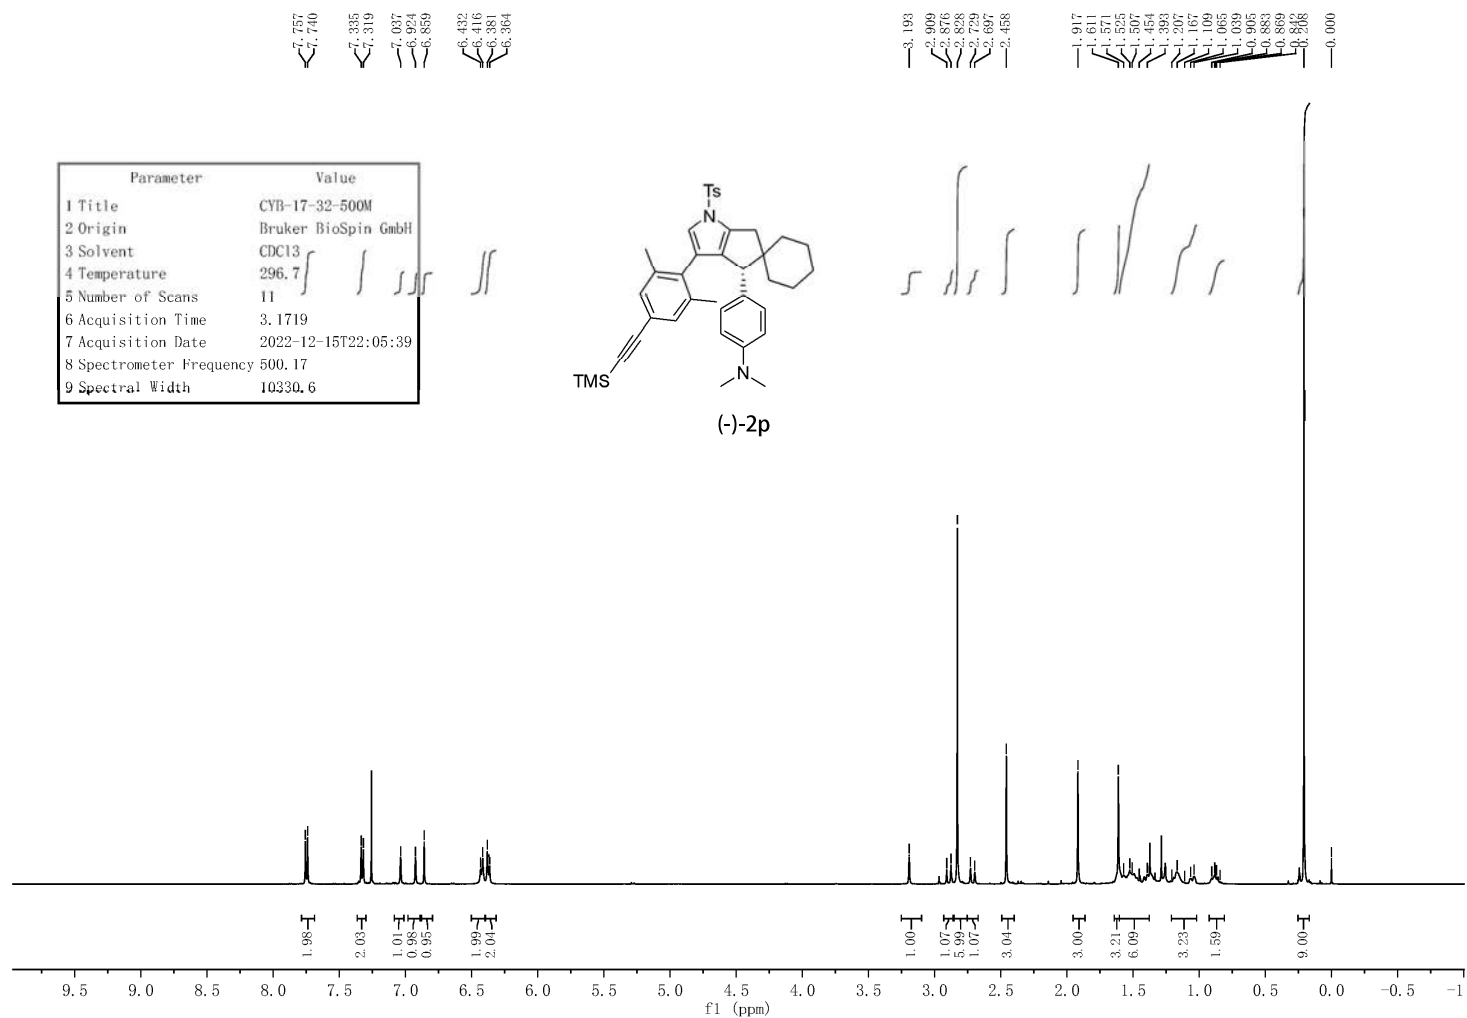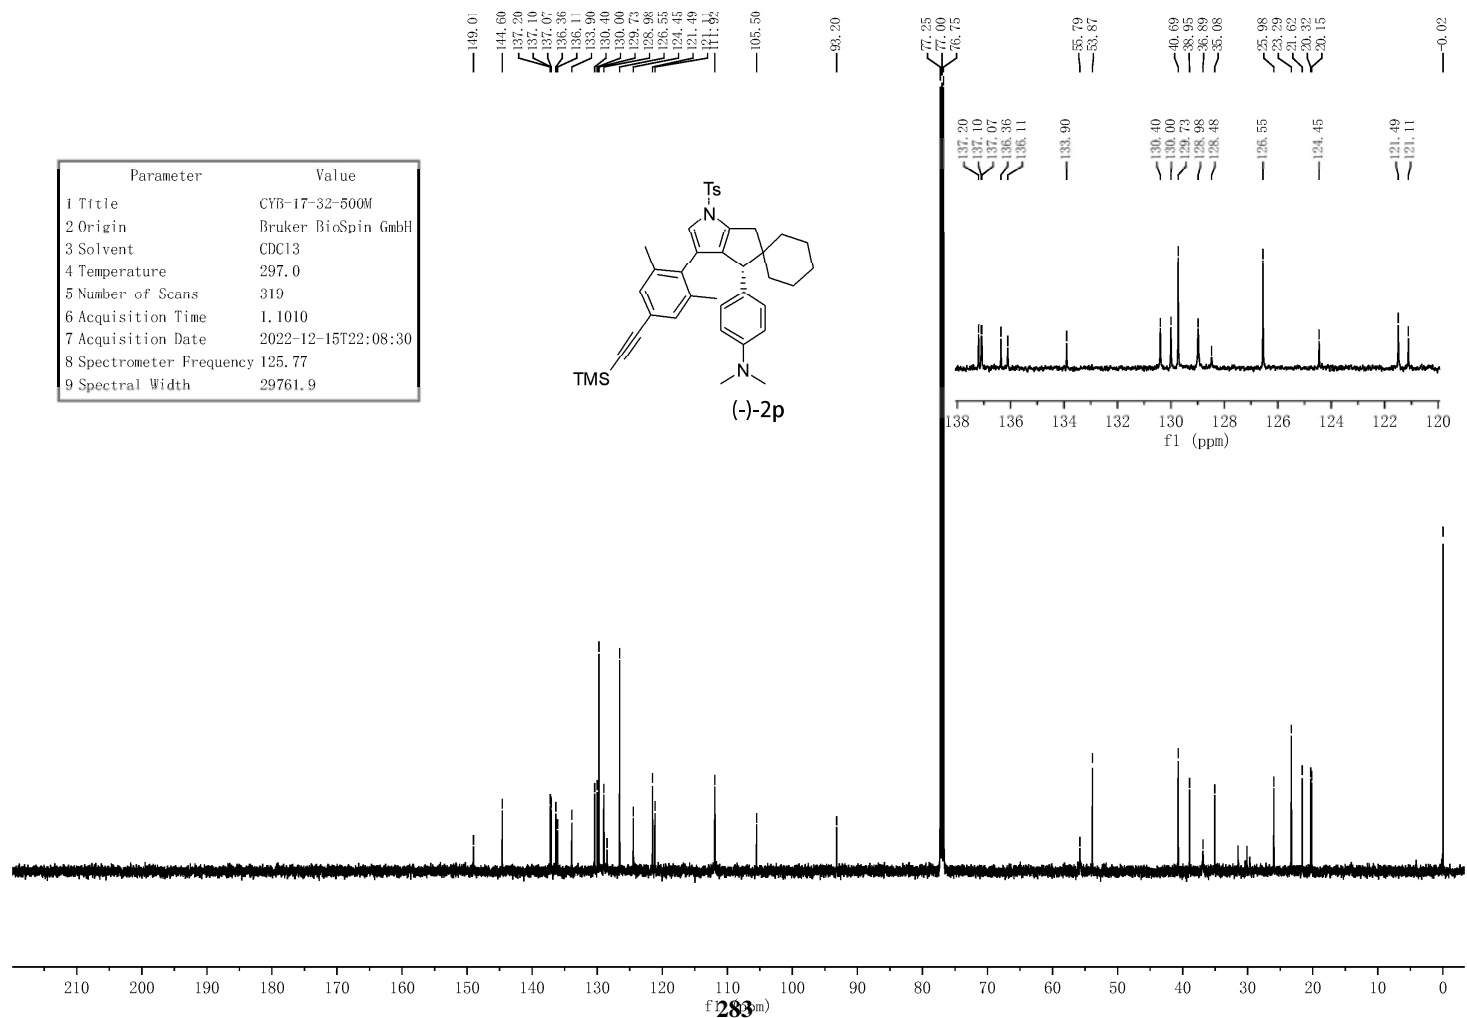

Supplementary Figure 183. <sup>1</sup>H and <sup>13</sup>C NMR spectra for (-)-2p

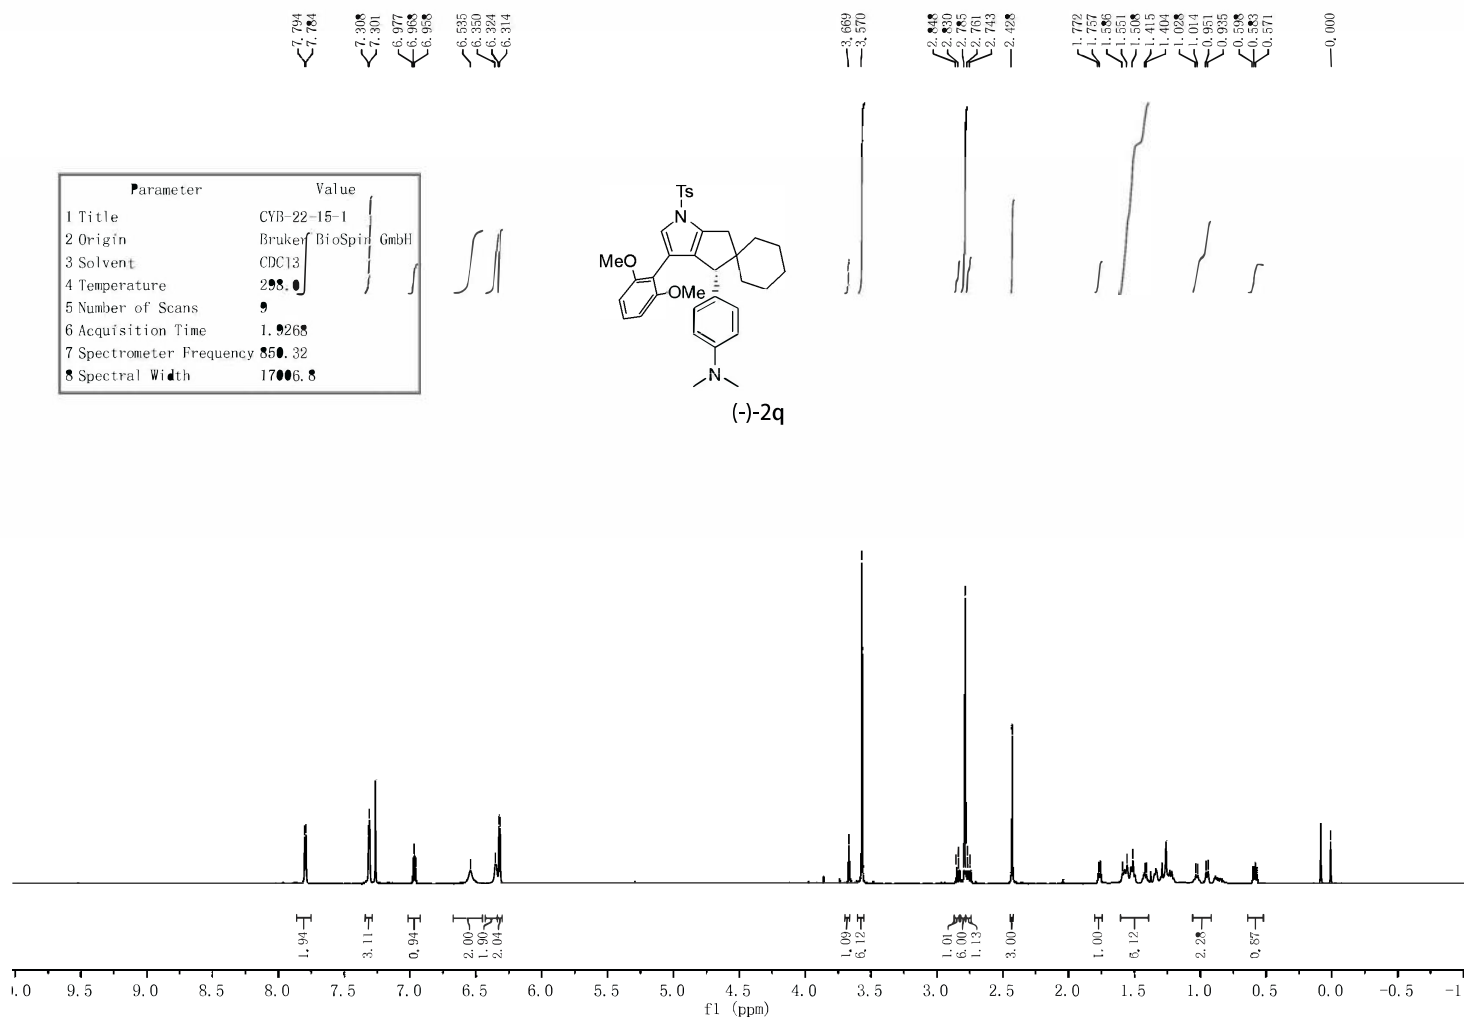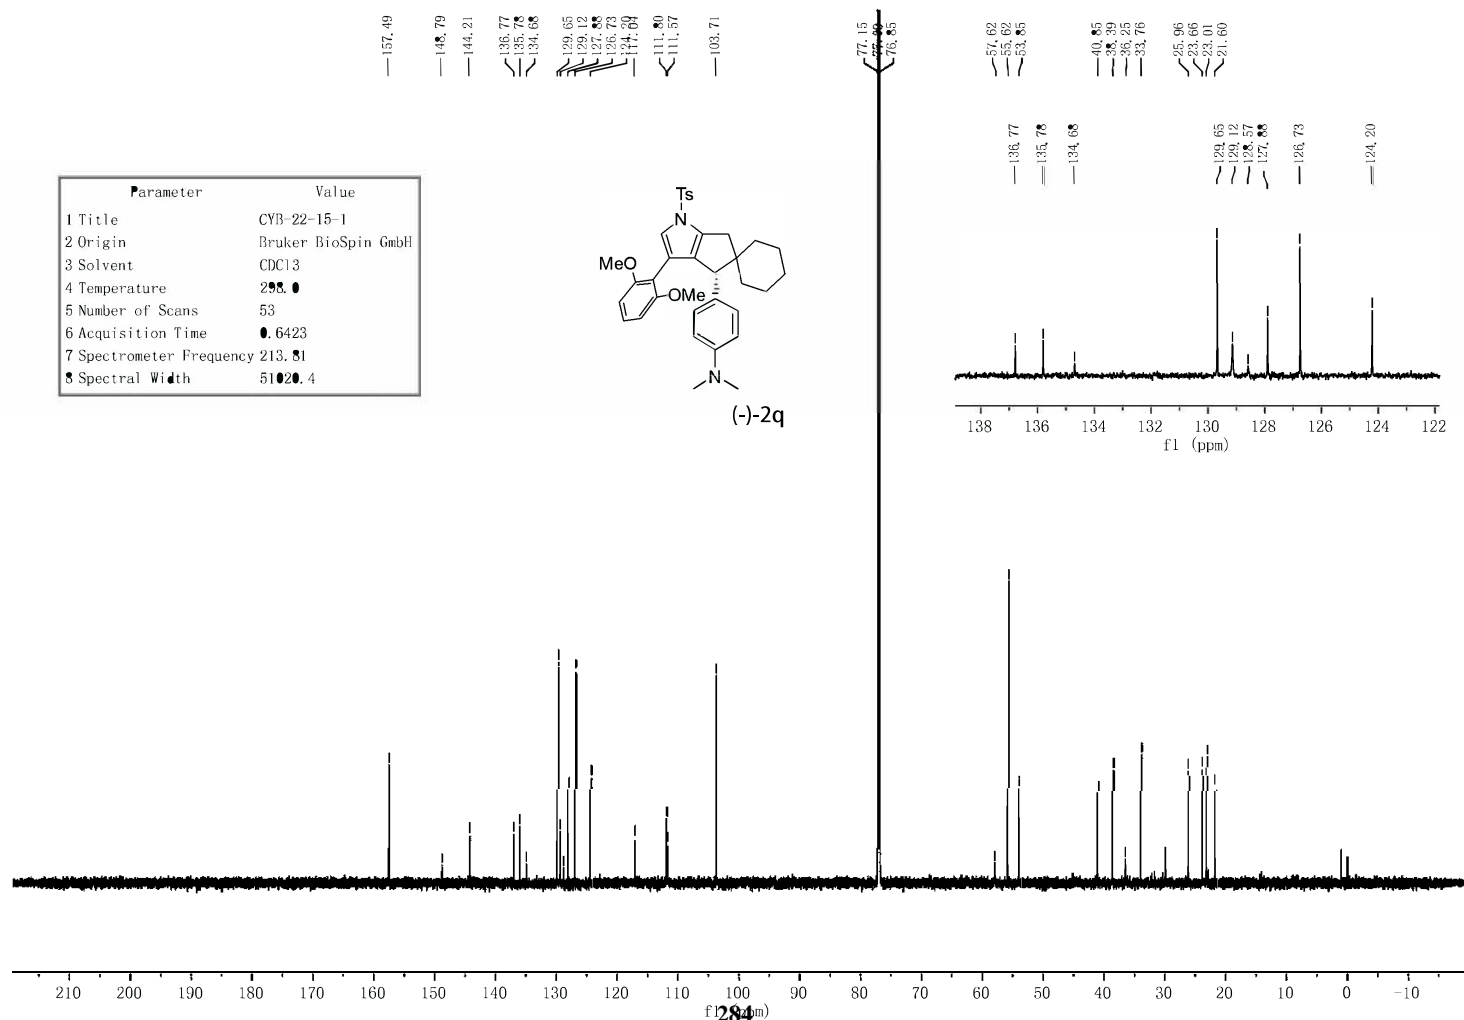

Supplementary Figure 184. <sup>1</sup>H and <sup>13</sup>C NMR spectra for (-)-2q

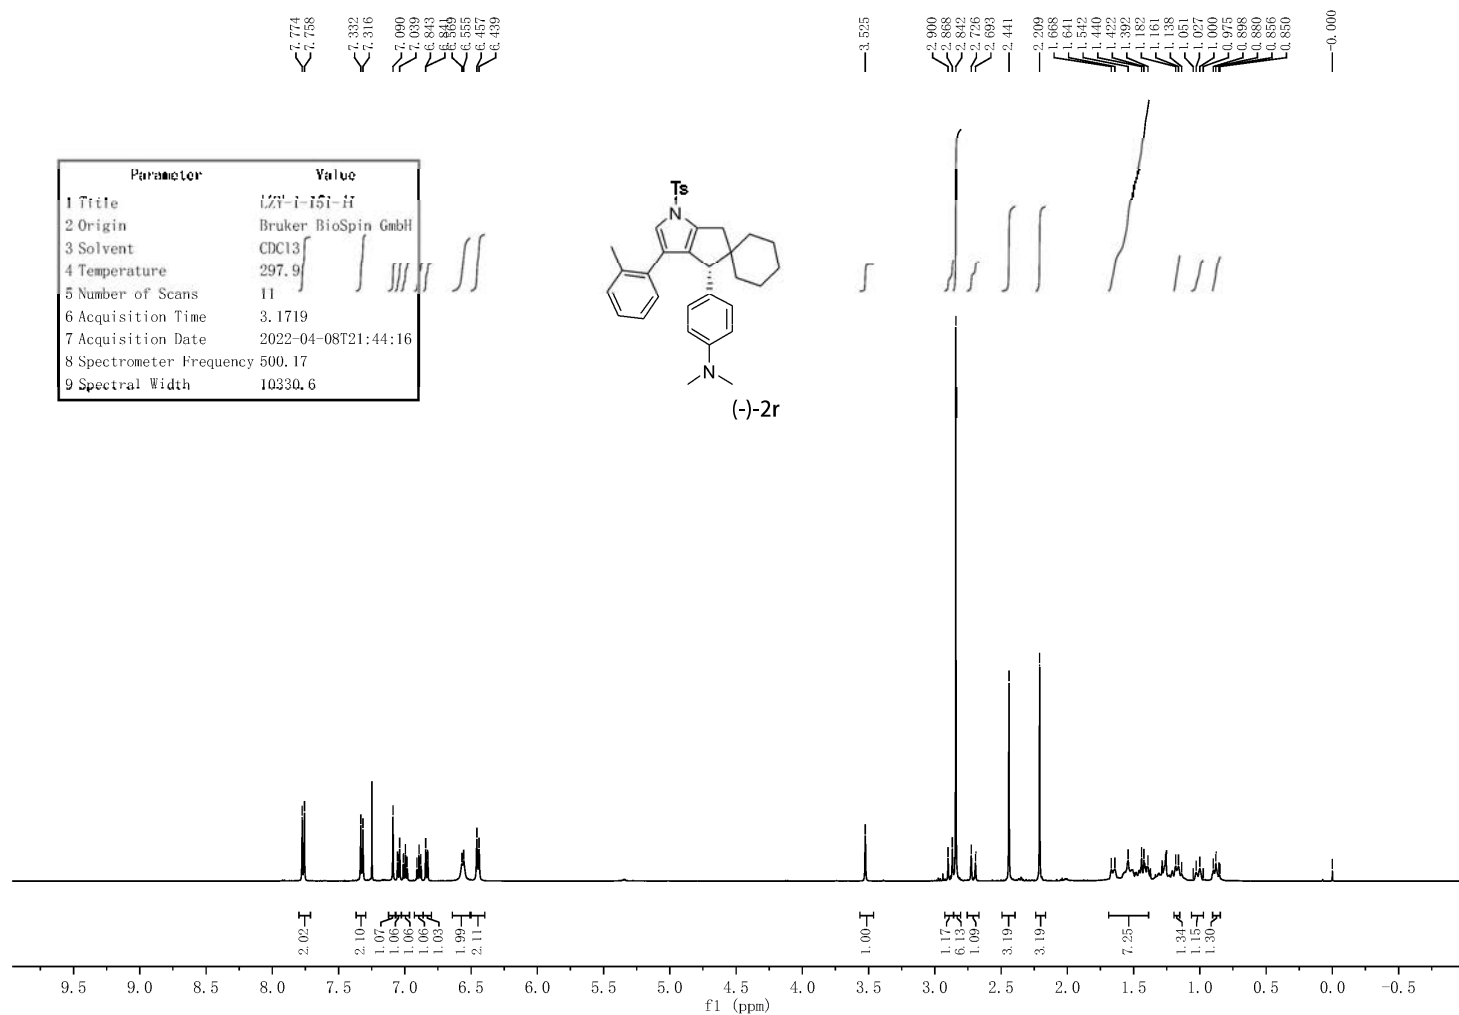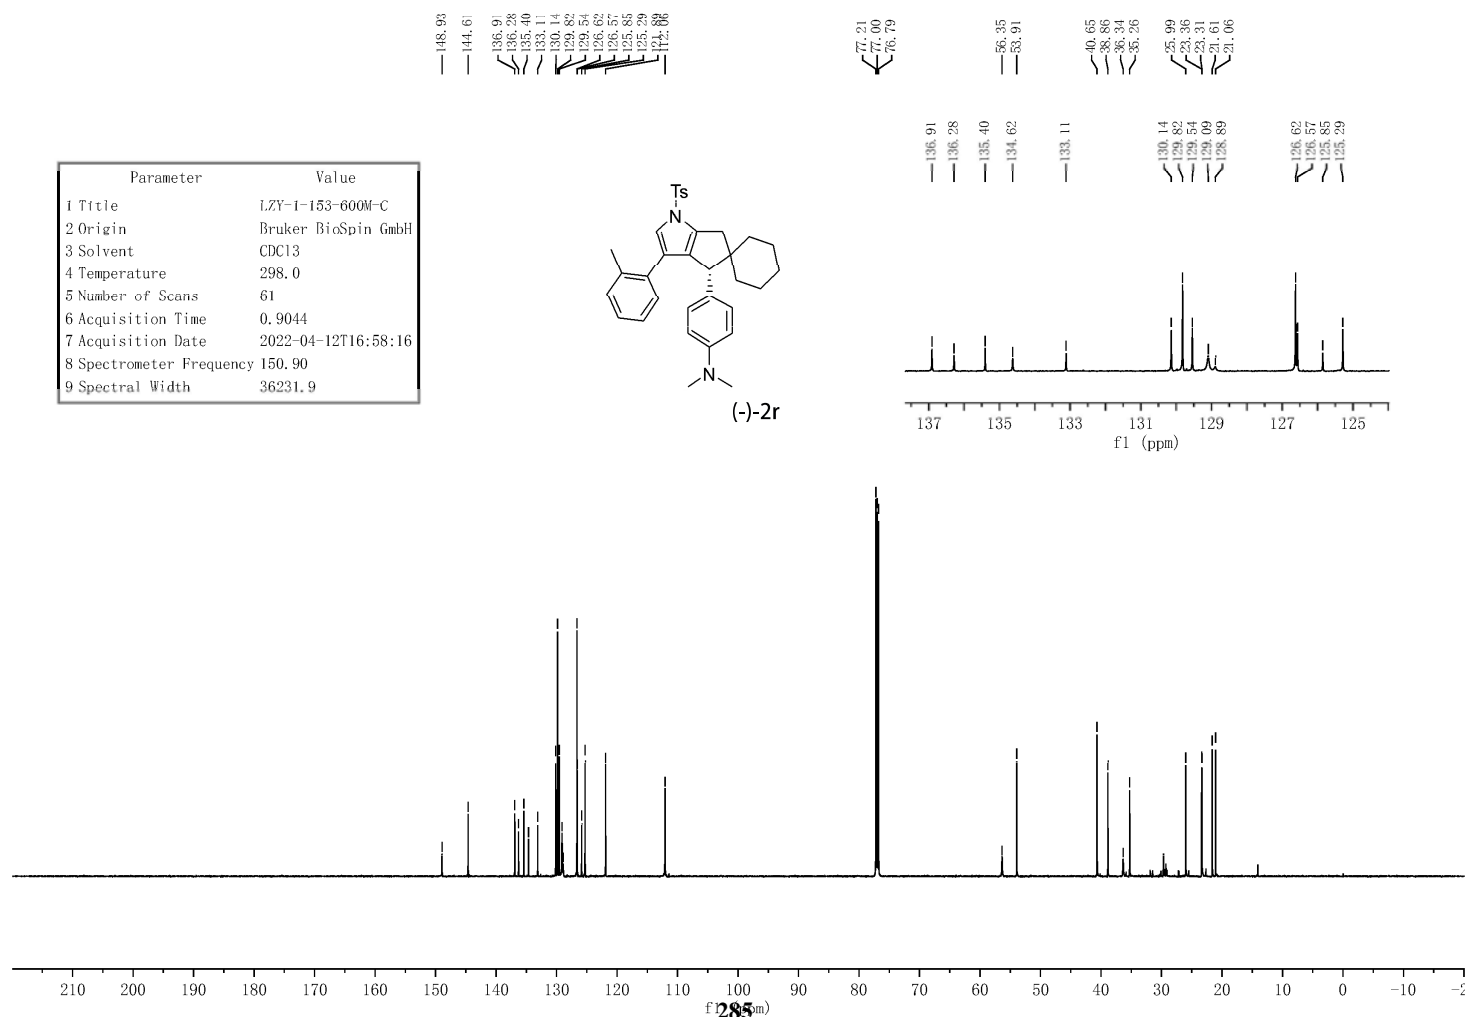

Supplementary Figure 185. <sup>1</sup>H and <sup>13</sup>C NMR spectra for (-)-2r

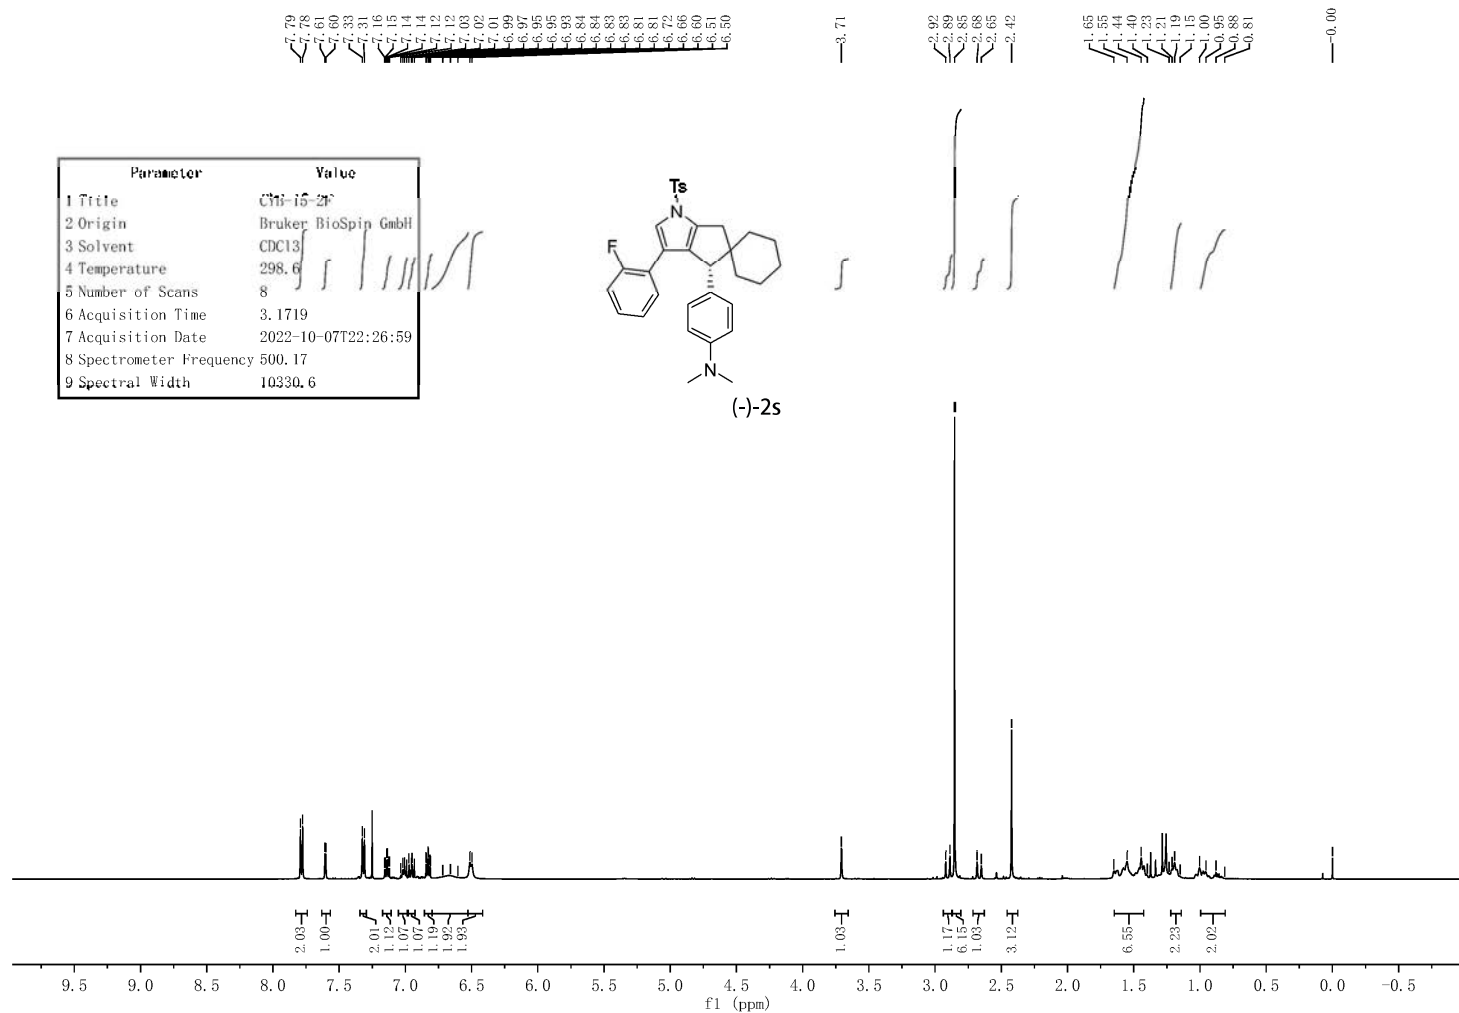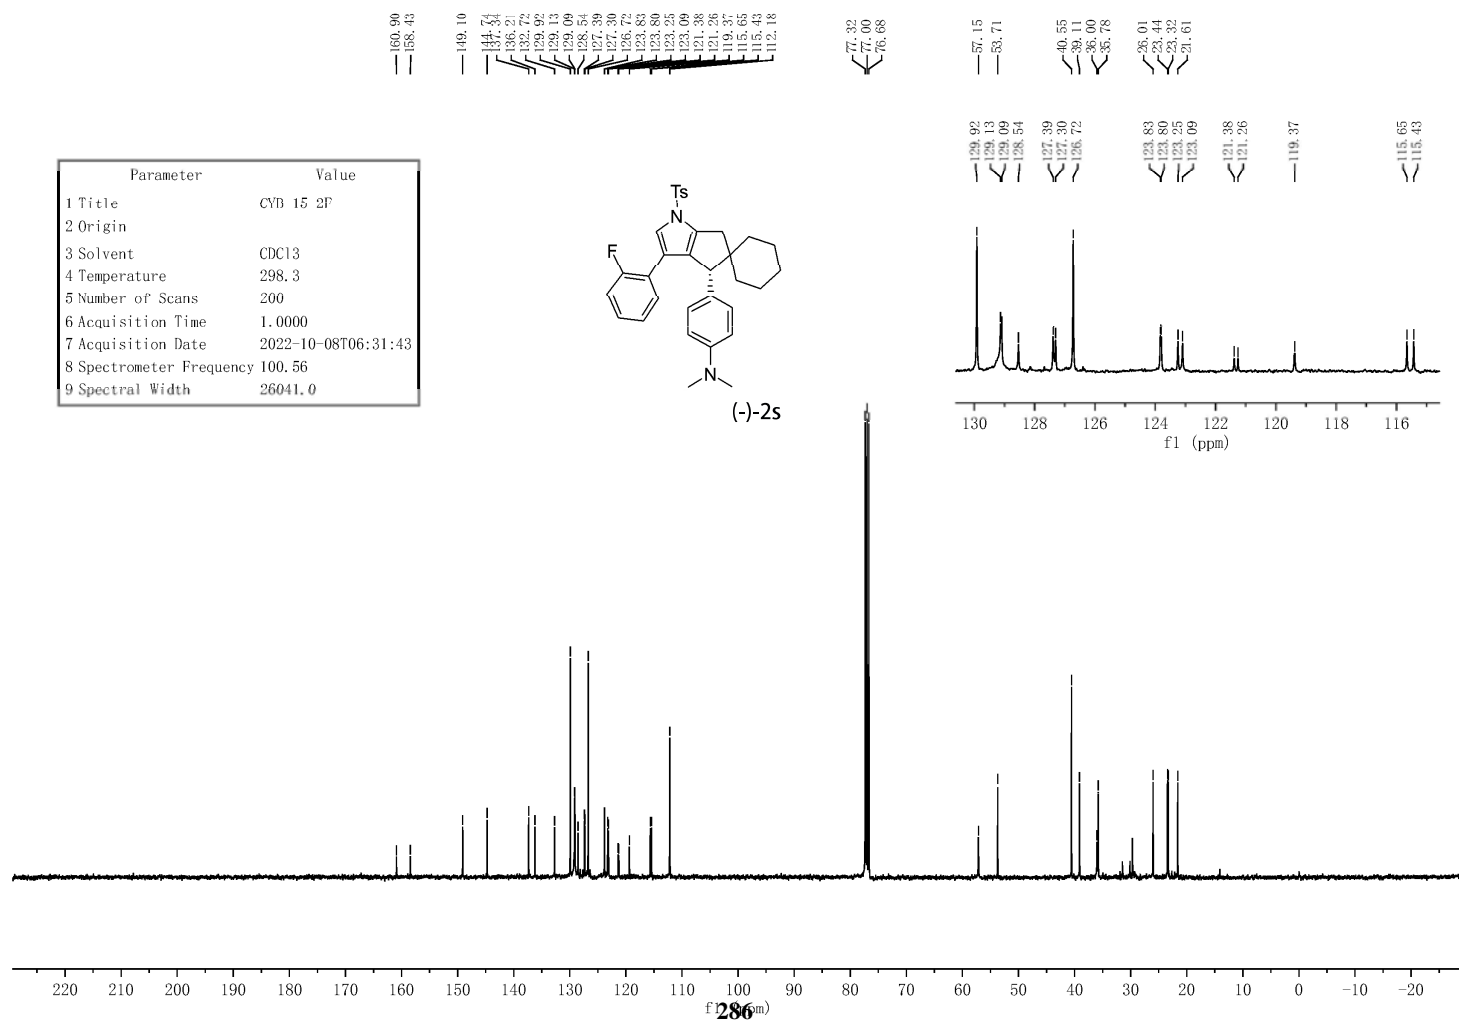

Supplementary Figure 186. <sup>1</sup>H and <sup>13</sup>C NMR spectra for (-)-2s

| Parameter                | Value               |
|--------------------------|---------------------|
| 1 Title                  | CYB 15 2F           |
| 2 Origin                 |                     |
| 3 Solvent                | CDC13               |
| 4 Temperature            | 298.4               |
| 5 Number of Scans        | 50                  |
| 6 Acquisition Time       | 1.0000              |
| 7 Acquisition Date       | 2022-10-08T06:35:50 |
| 8 Spectrometer Frequency | 376.28              |
| 9 Spectral Width         | 96153.0             |

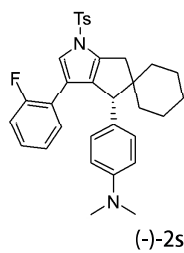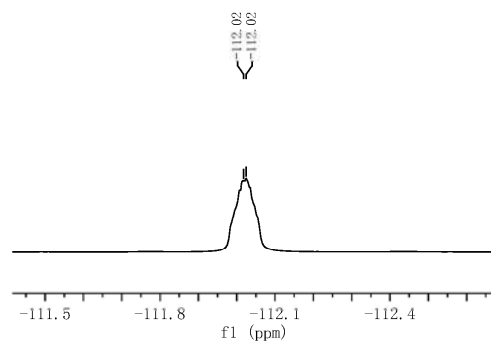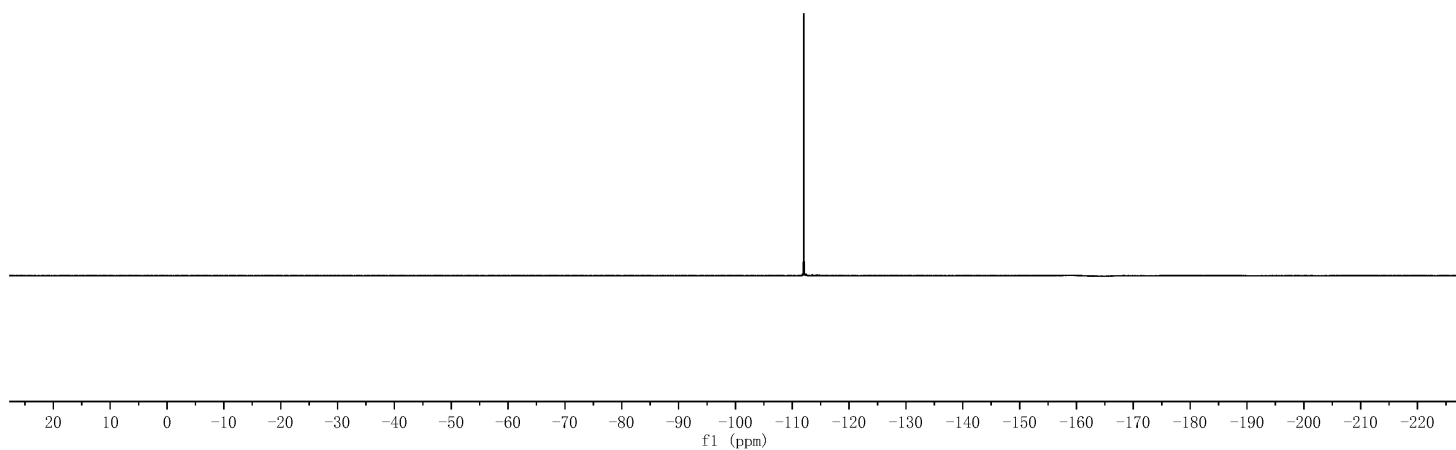

**Supplementary Figure 187. <sup>19</sup>F NMR spectra for (-)-2s**

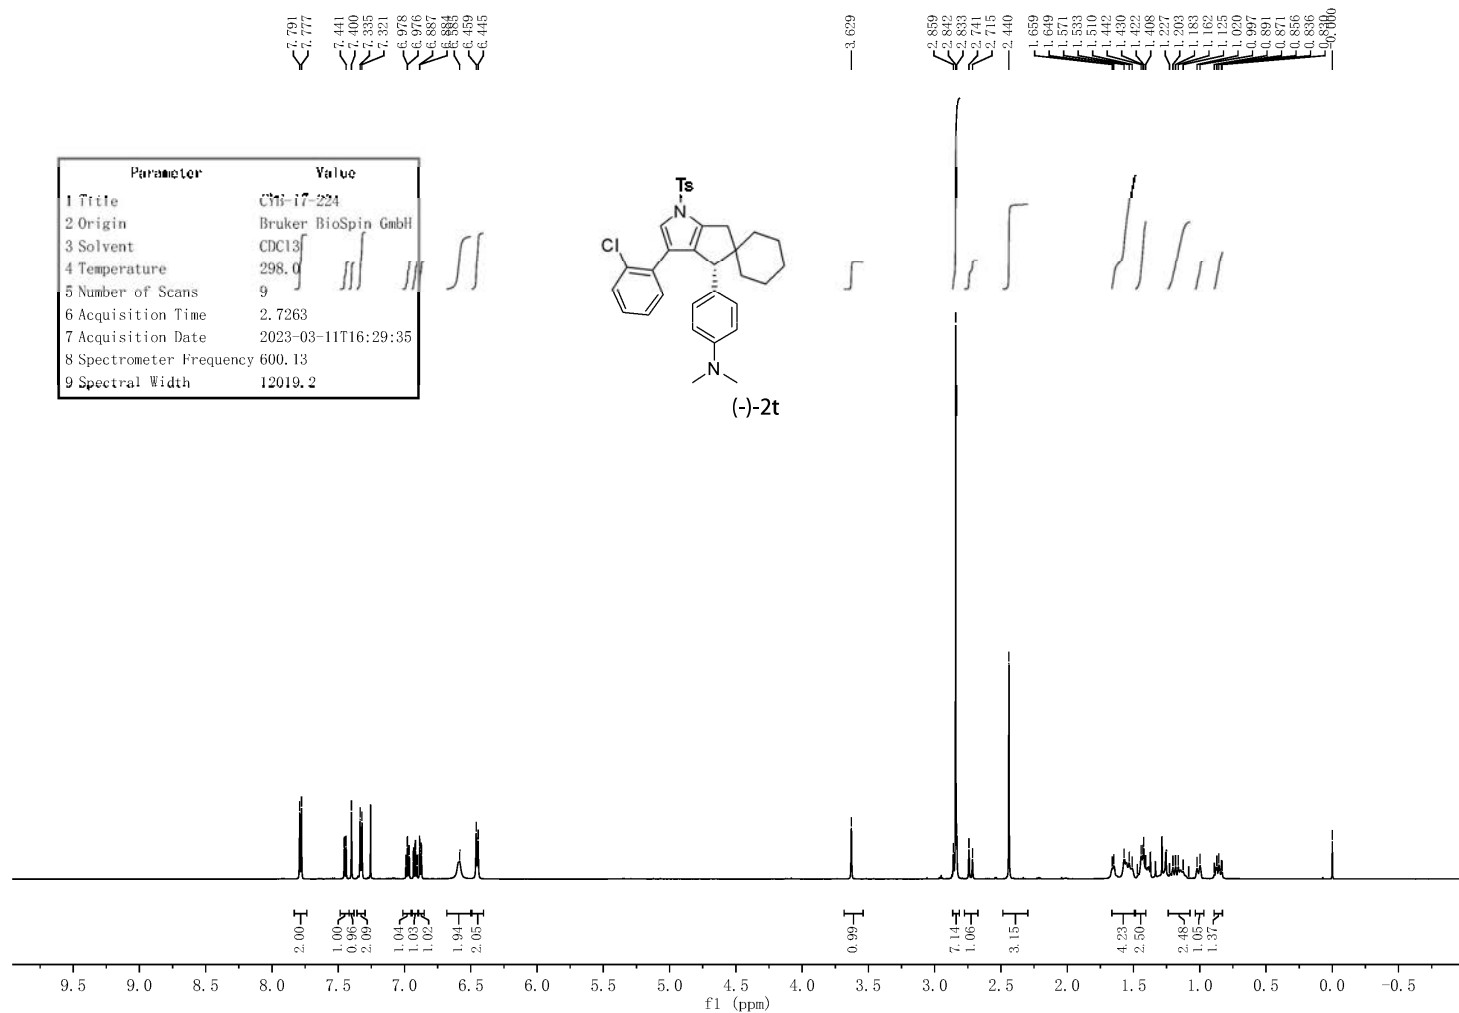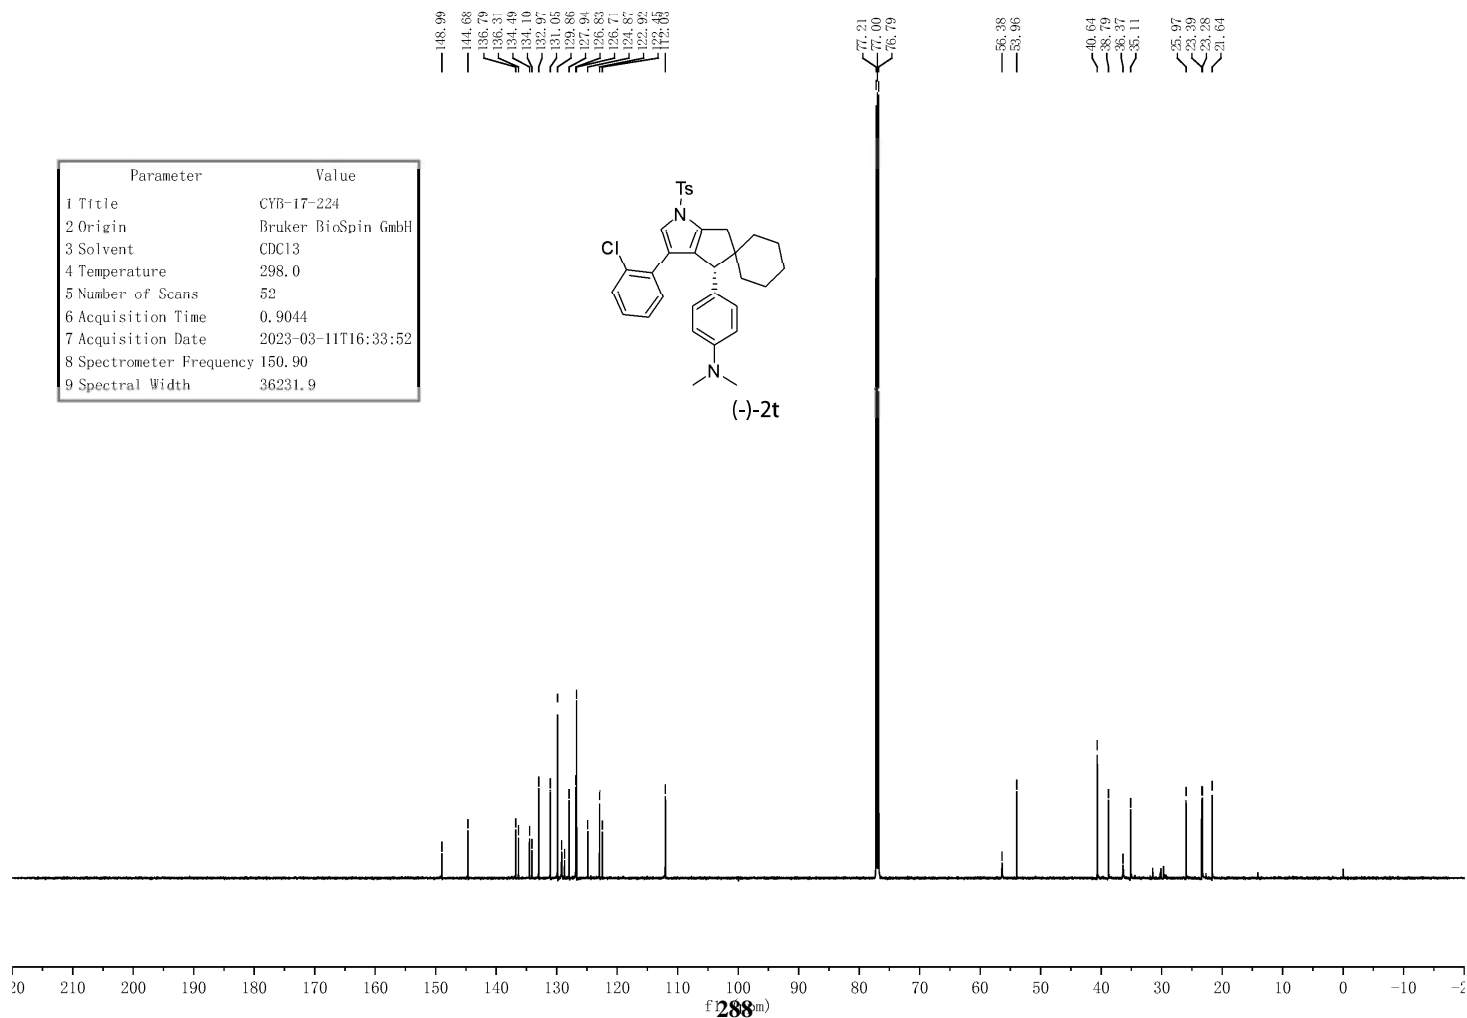

Supplementary Figure 188. <sup>1</sup>H and <sup>13</sup>C NMR spectra for (-)-2t



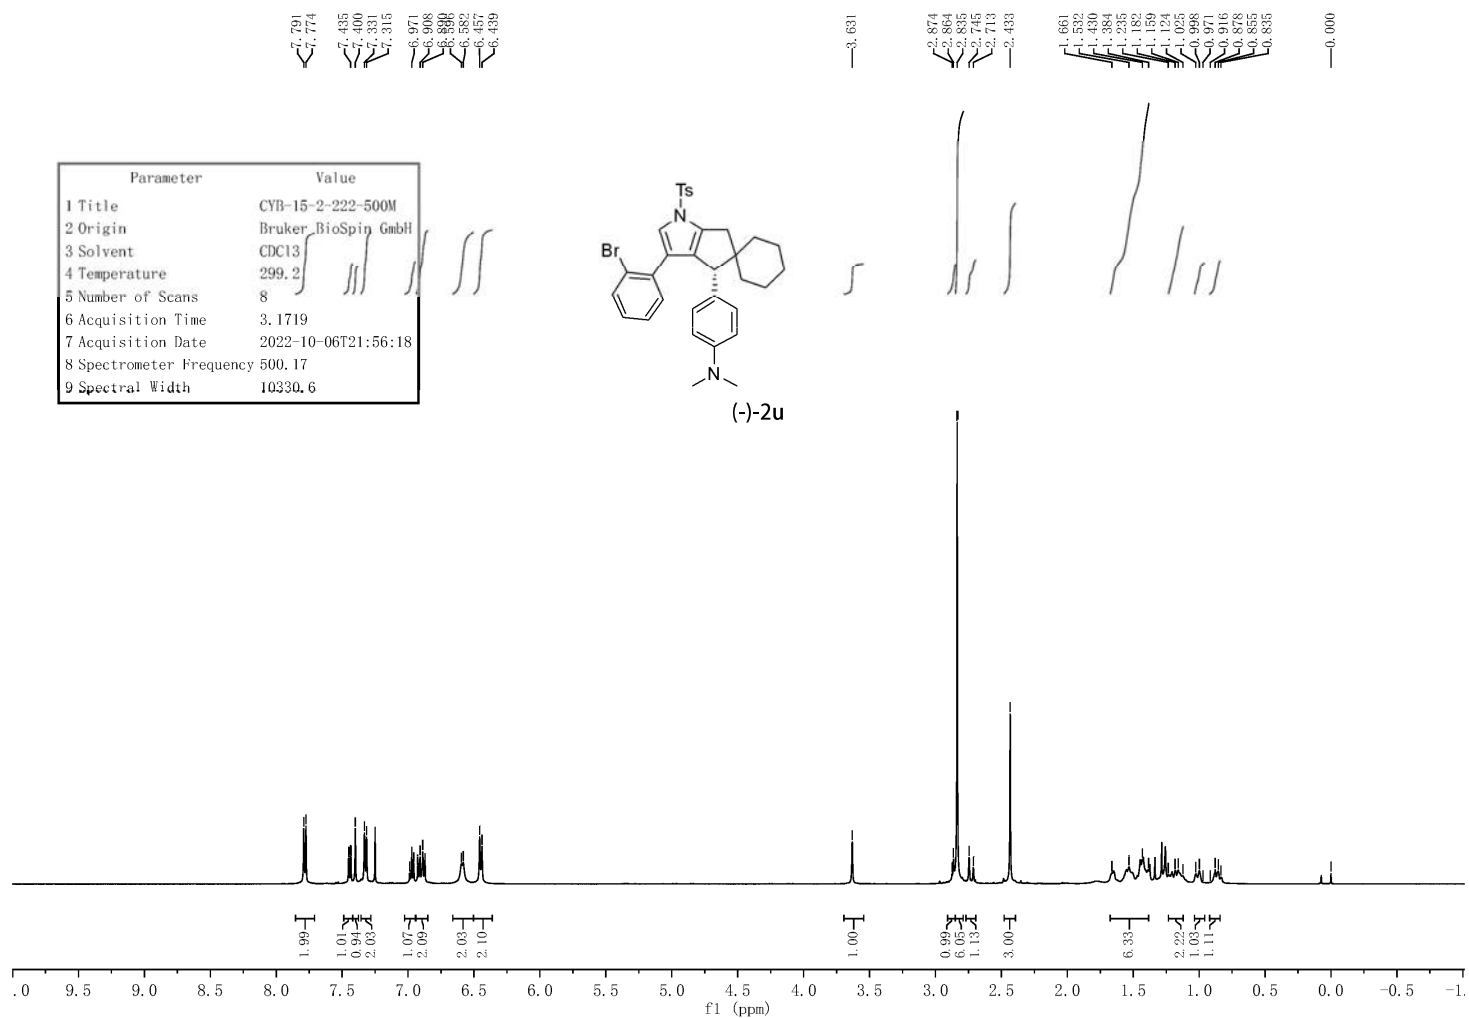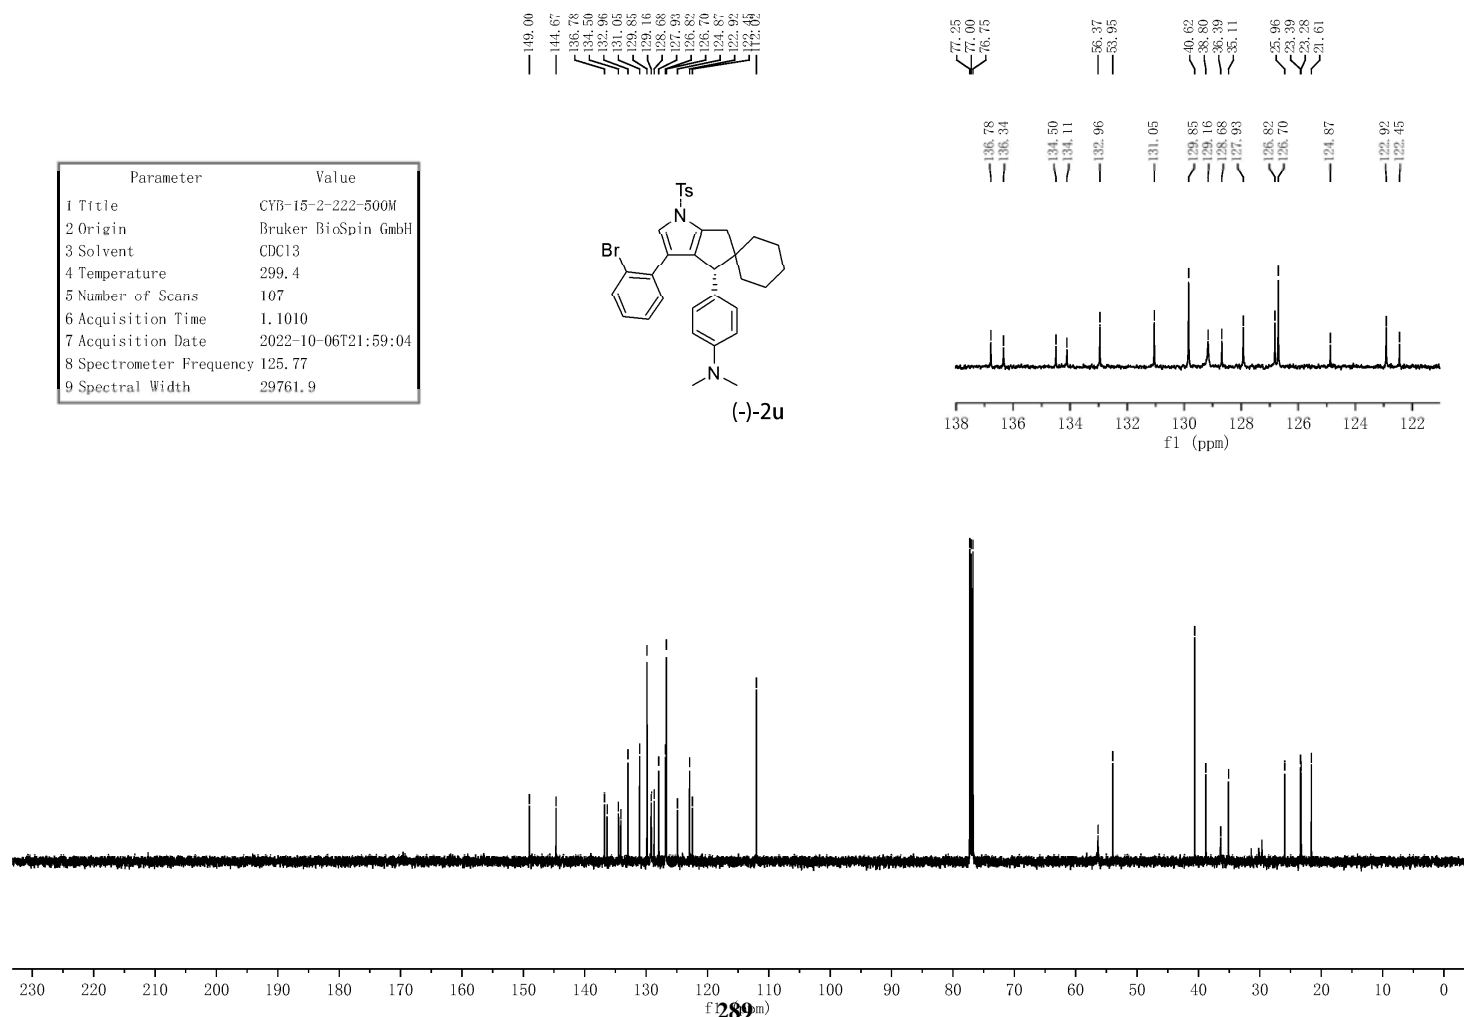

Supplementary Figure 189. <sup>1</sup>H and <sup>13</sup>C NMR spectra for (-)-2u

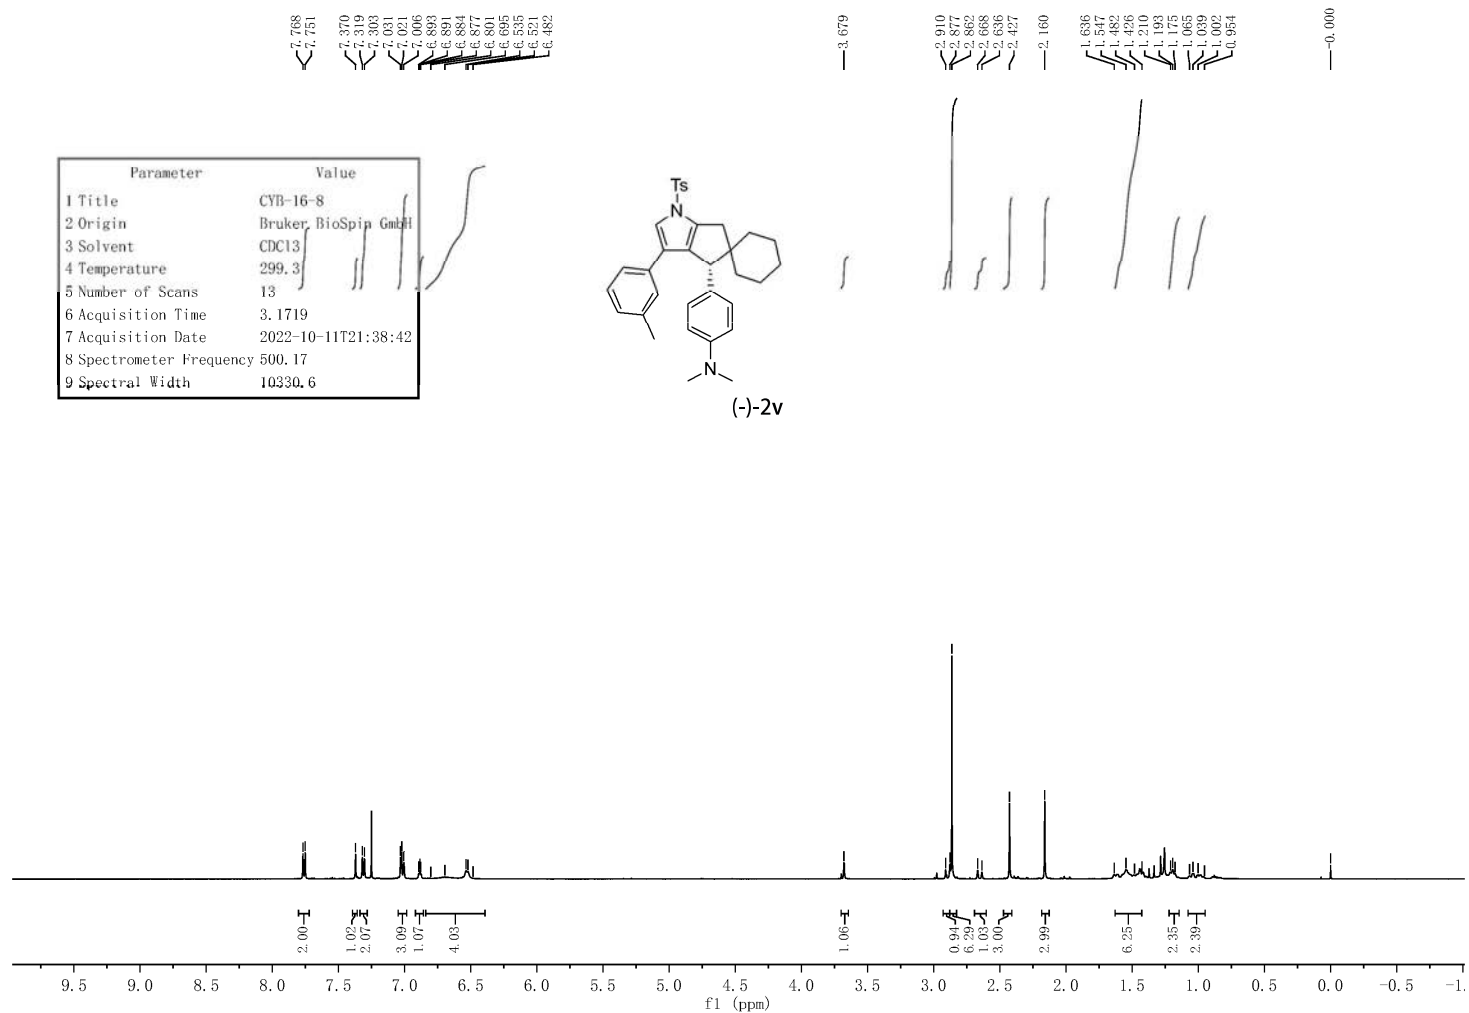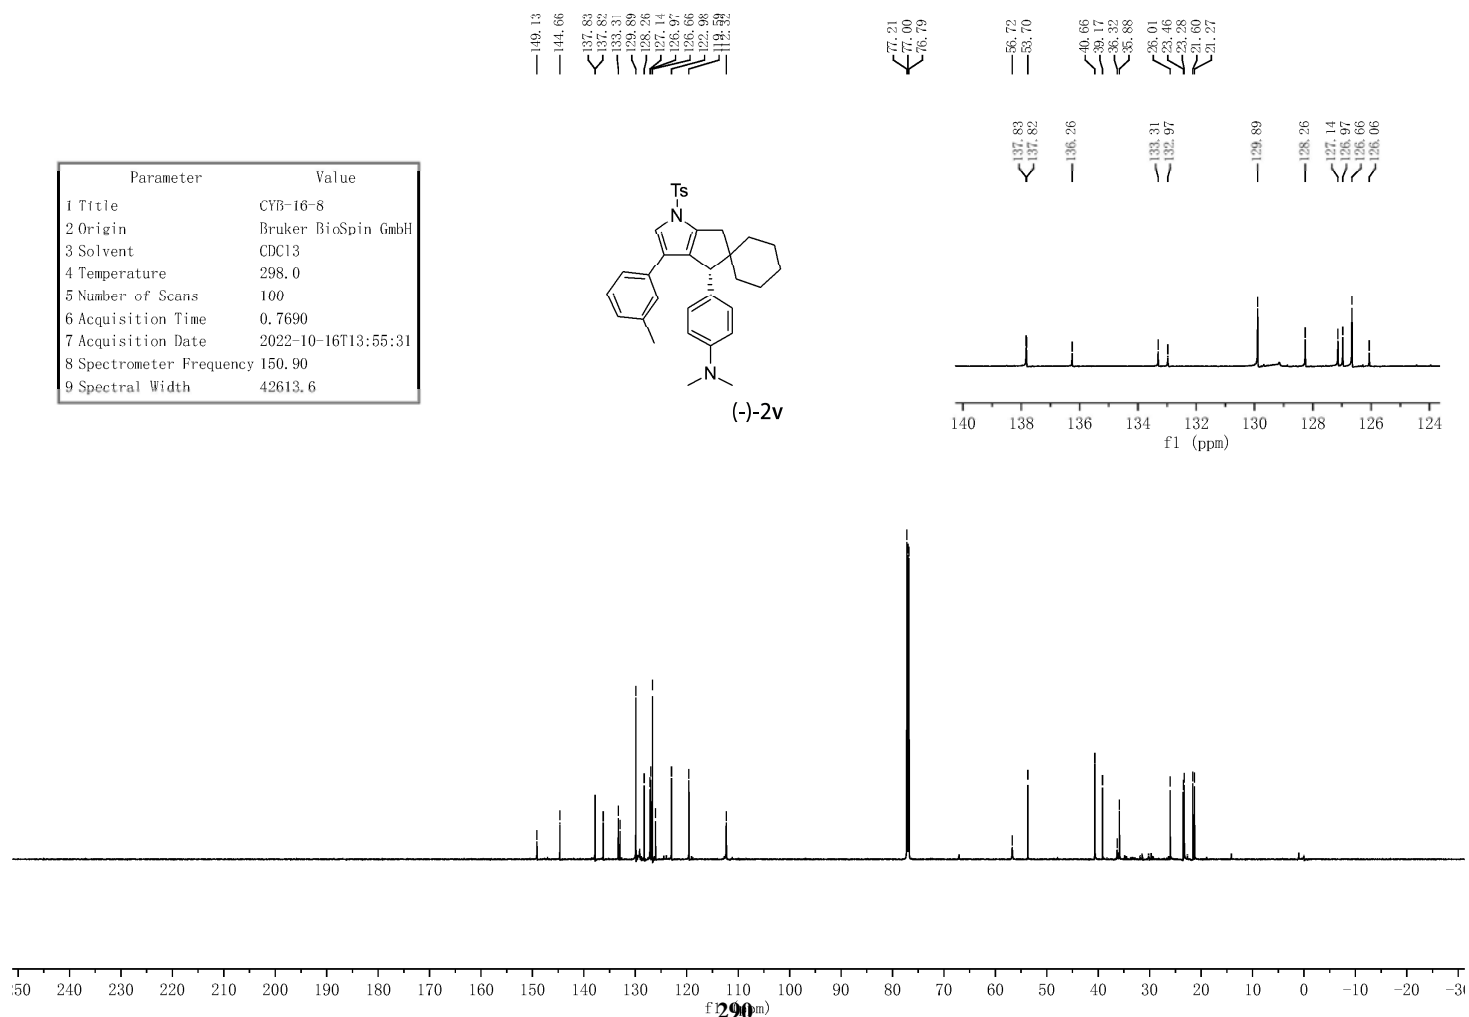

Supplementary Figure 190.  $^1\text{H}$  and  $^{13}\text{C}$  NMR spectra for (-)-2v

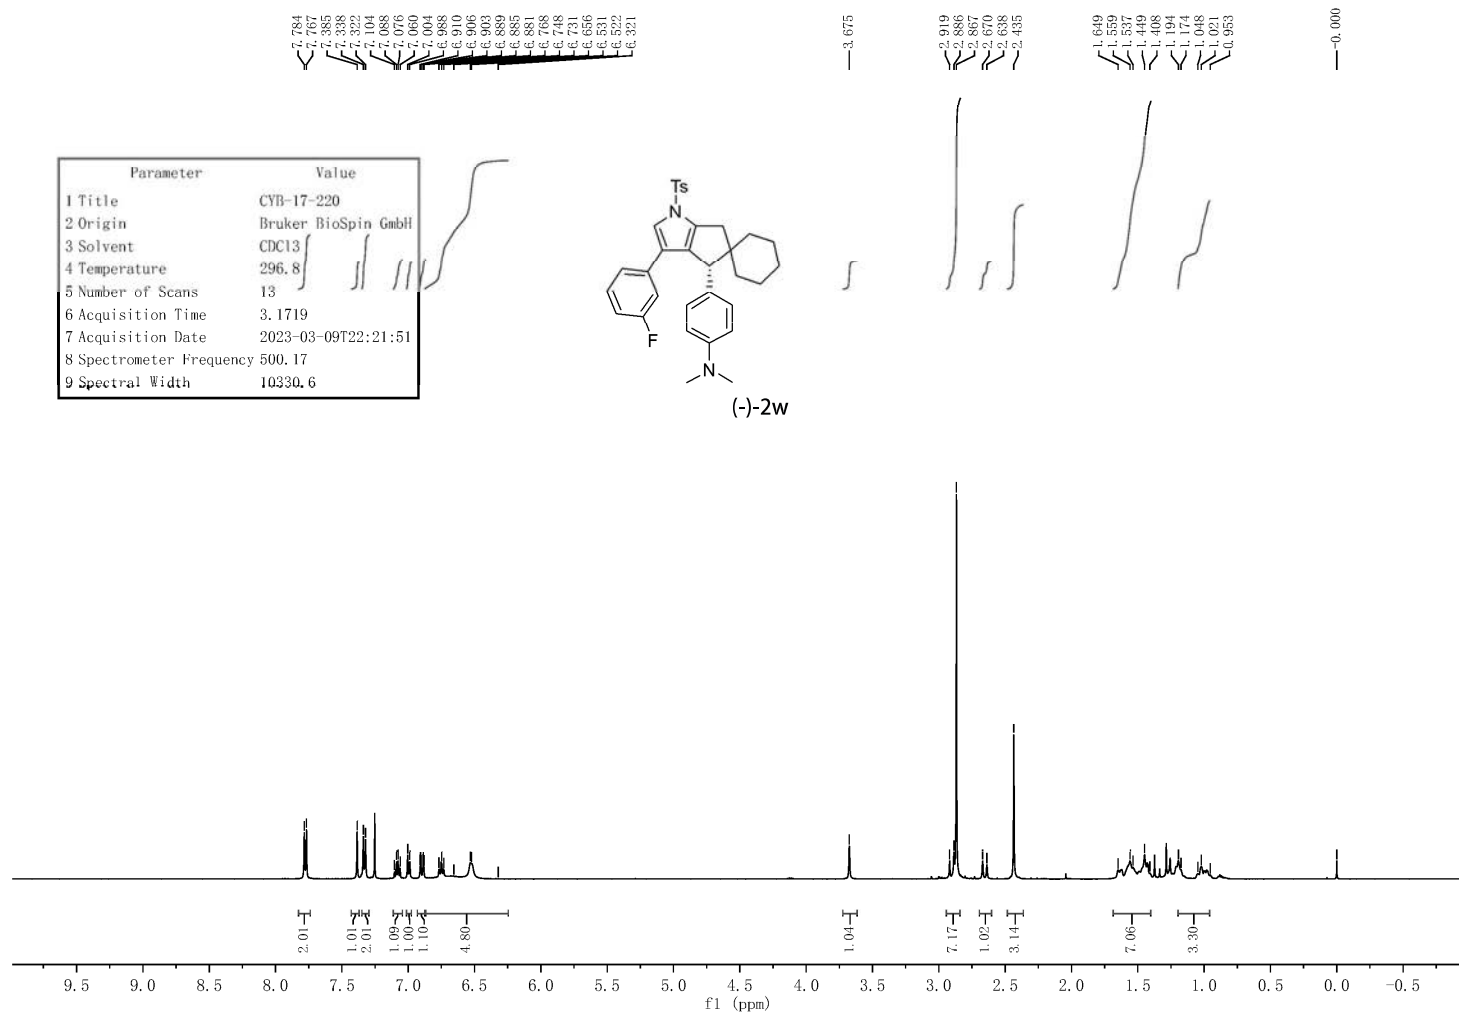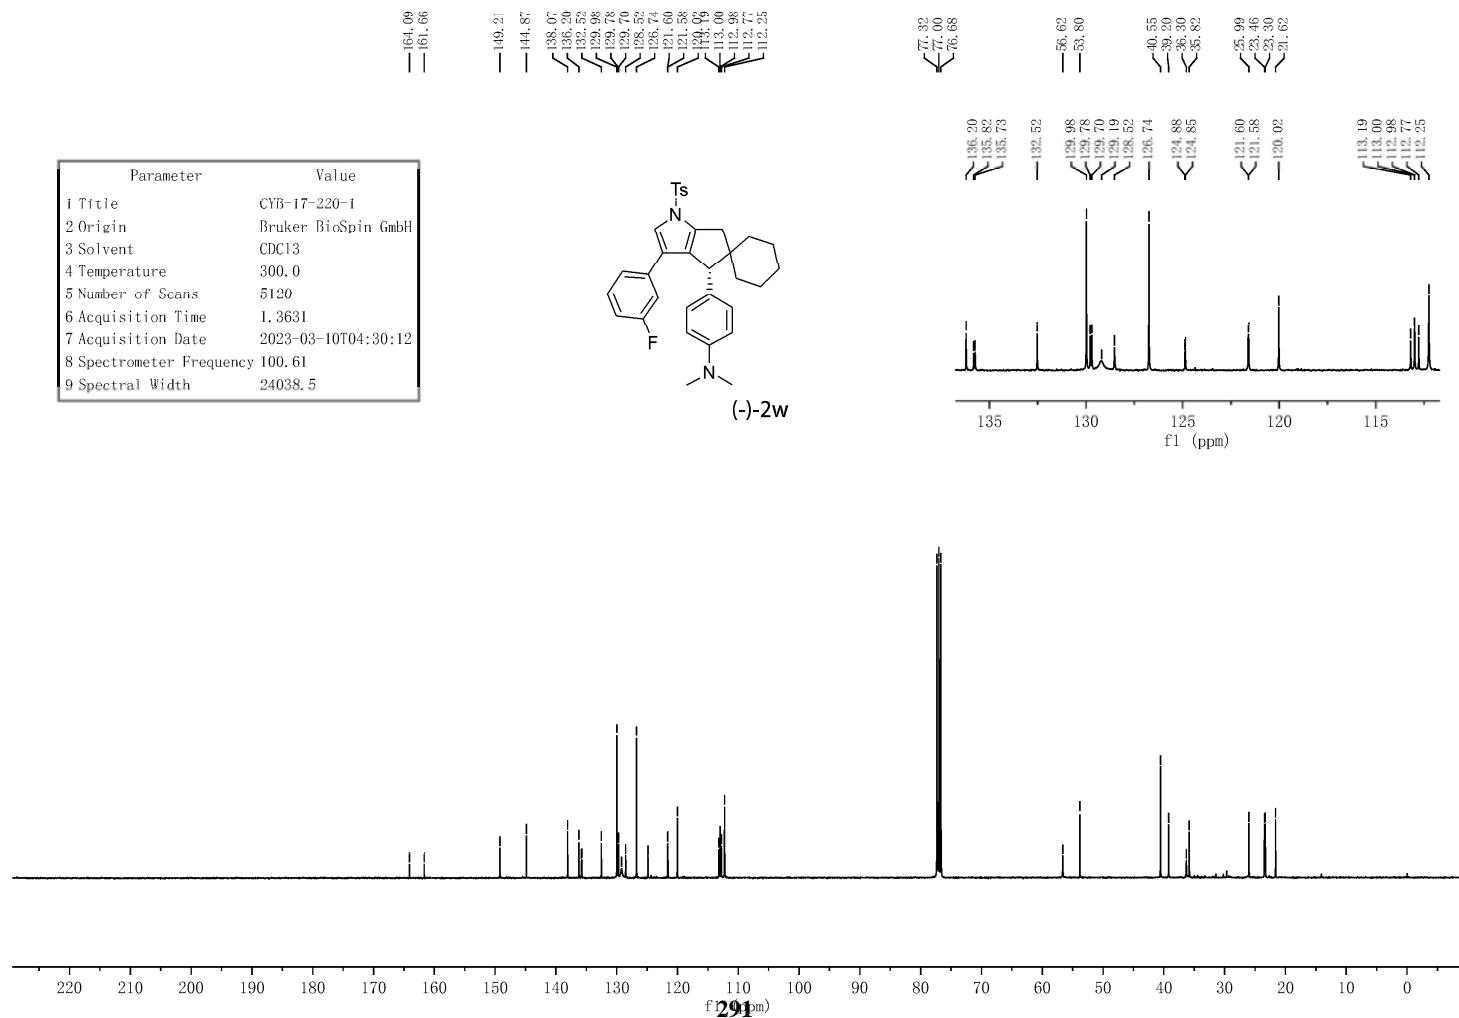

Supplementary Figure 191. <sup>1</sup>H and <sup>13</sup>C NMR spectra for (-)-2w

-113.35  
-113.38  
-113.40  
-113.42

| Parameter                | Value               |
|--------------------------|---------------------|
| 1 Title                  | CYB 17 210 F19      |
| 2 Origin                 |                     |
| 3 Solvent                | CDC13               |
| 4 Temperature            | 297.5               |
| 5 Number of Scans        | 100                 |
| 6 Acquisition Time       | 1.0000              |
| 7 Acquisition Date       | 2023-03-10T14:22:37 |
| 8 Spectrometer Frequency | 376.28              |
| 9 Spectral Width         | 96153.0             |

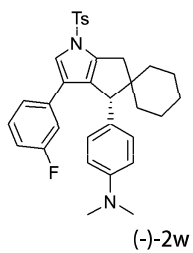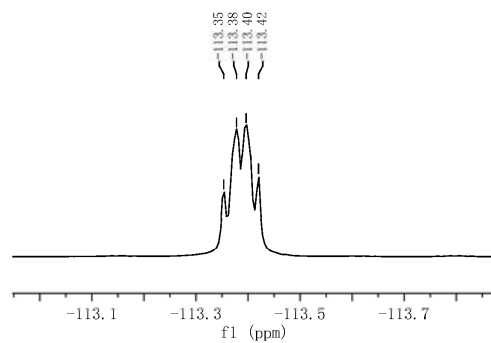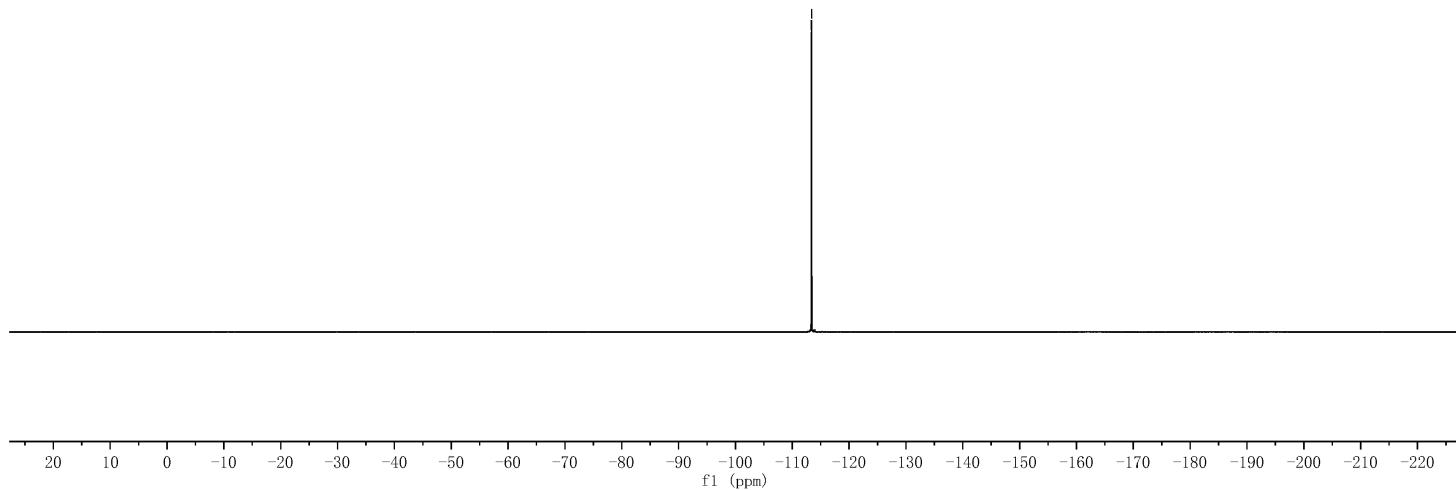

Supplementary Figure 192.  $^{19}\text{F}$  NMR spectra for (-)-2w

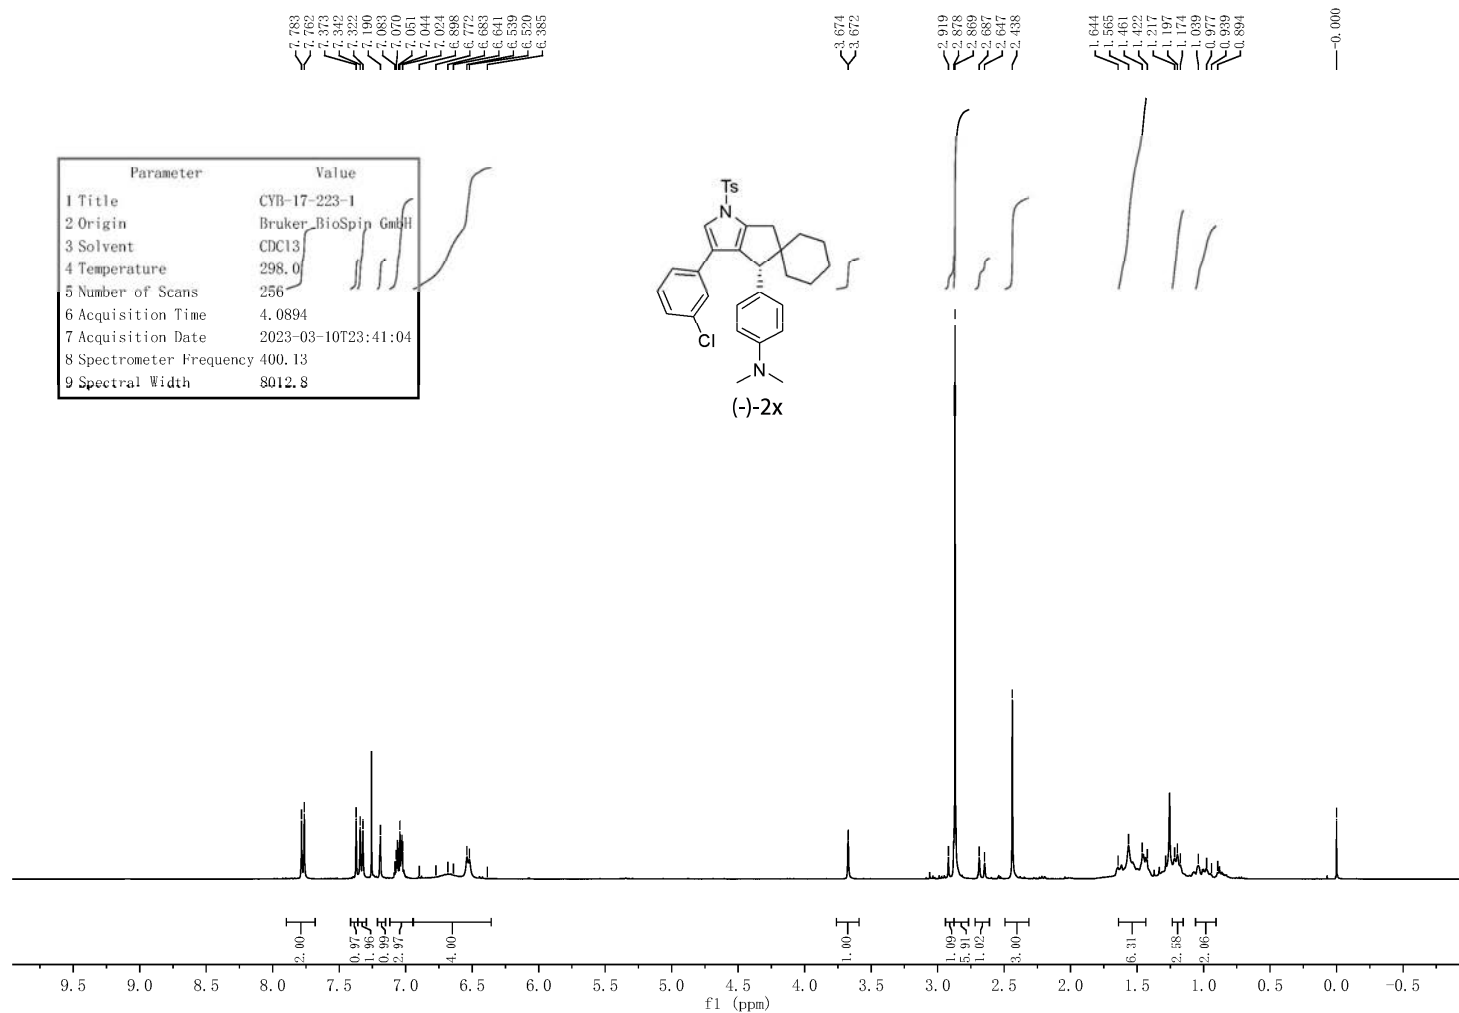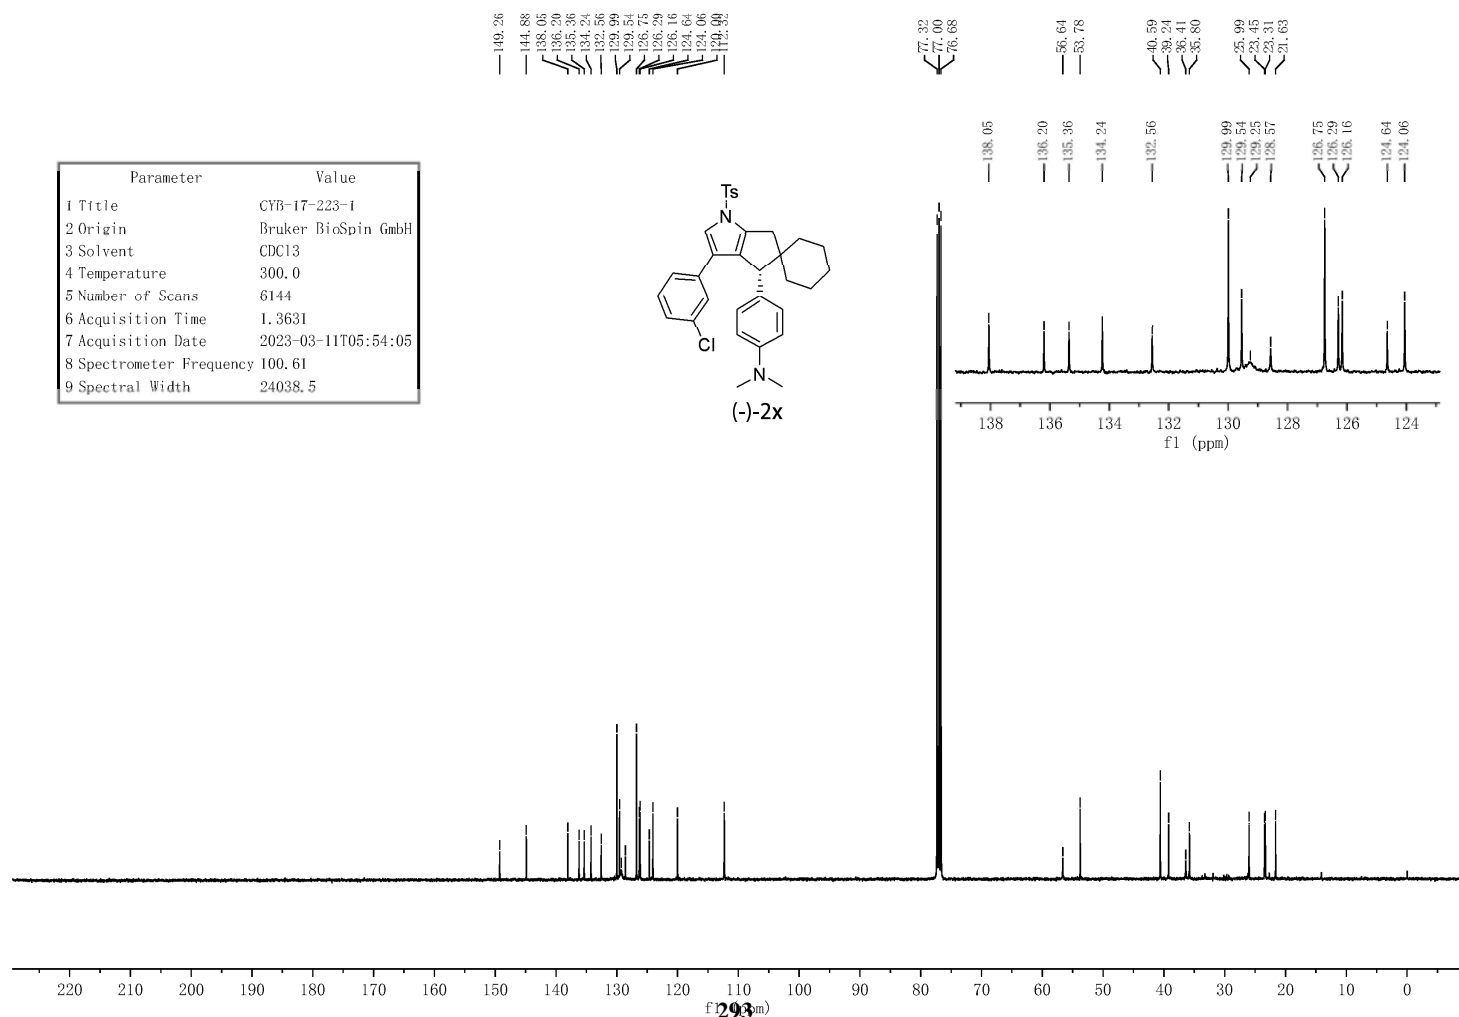

Supplementary Figure 193. <sup>1</sup>H and <sup>13</sup>C NMR spectra for (-)-2x

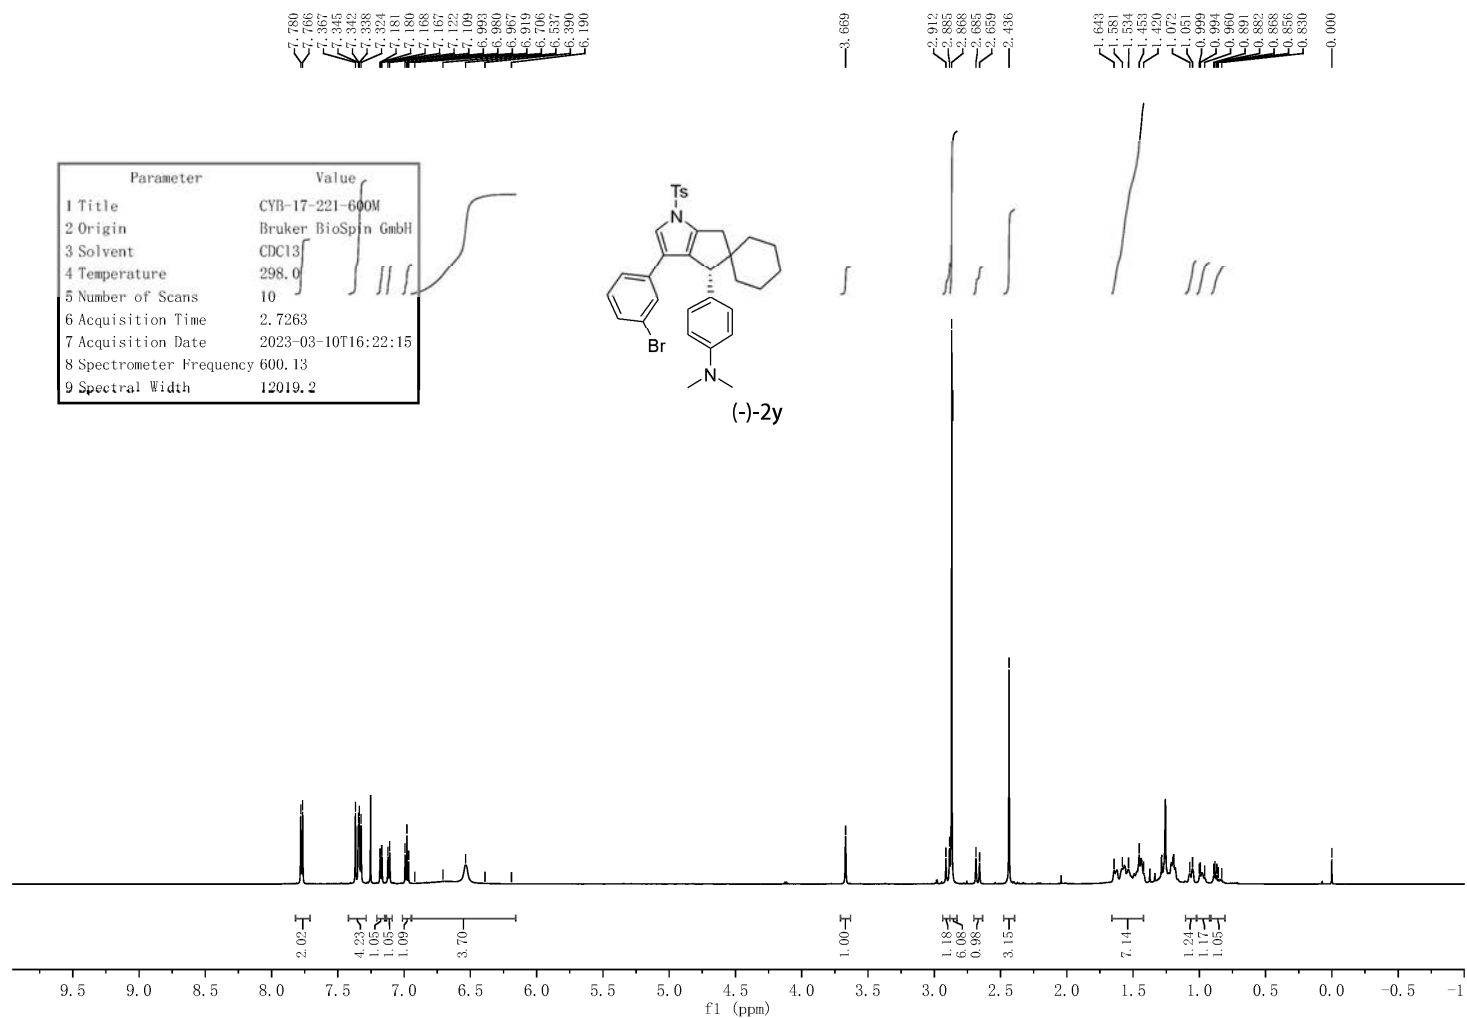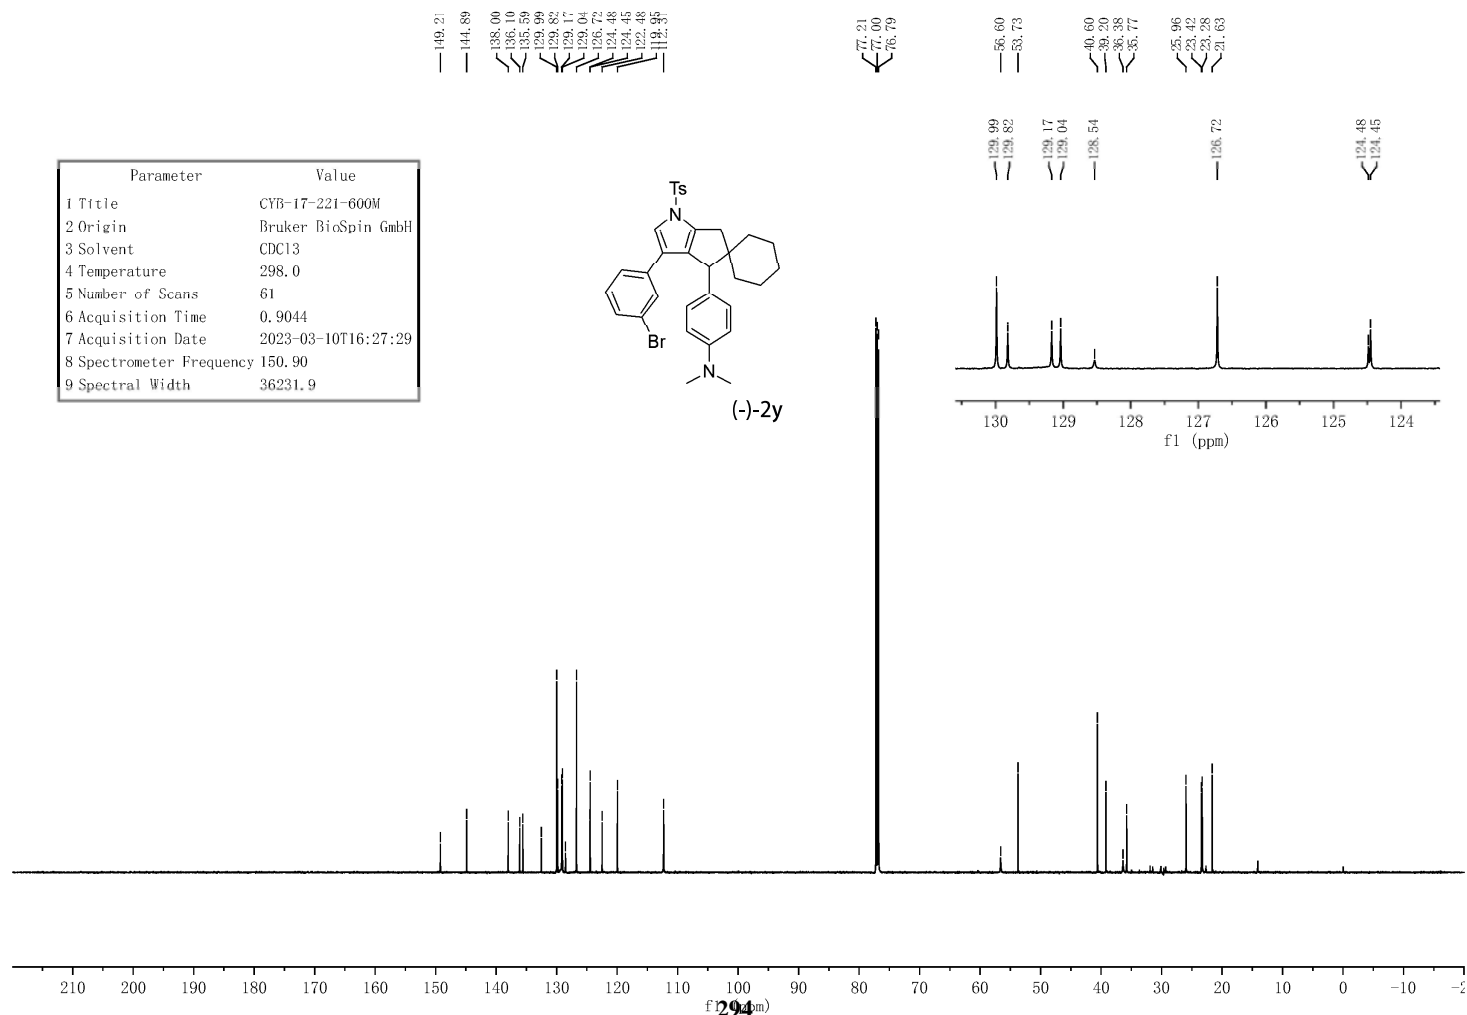

Supplementary Figure 194. <sup>1</sup>H and <sup>13</sup>C NMR spectra for (-)-2y

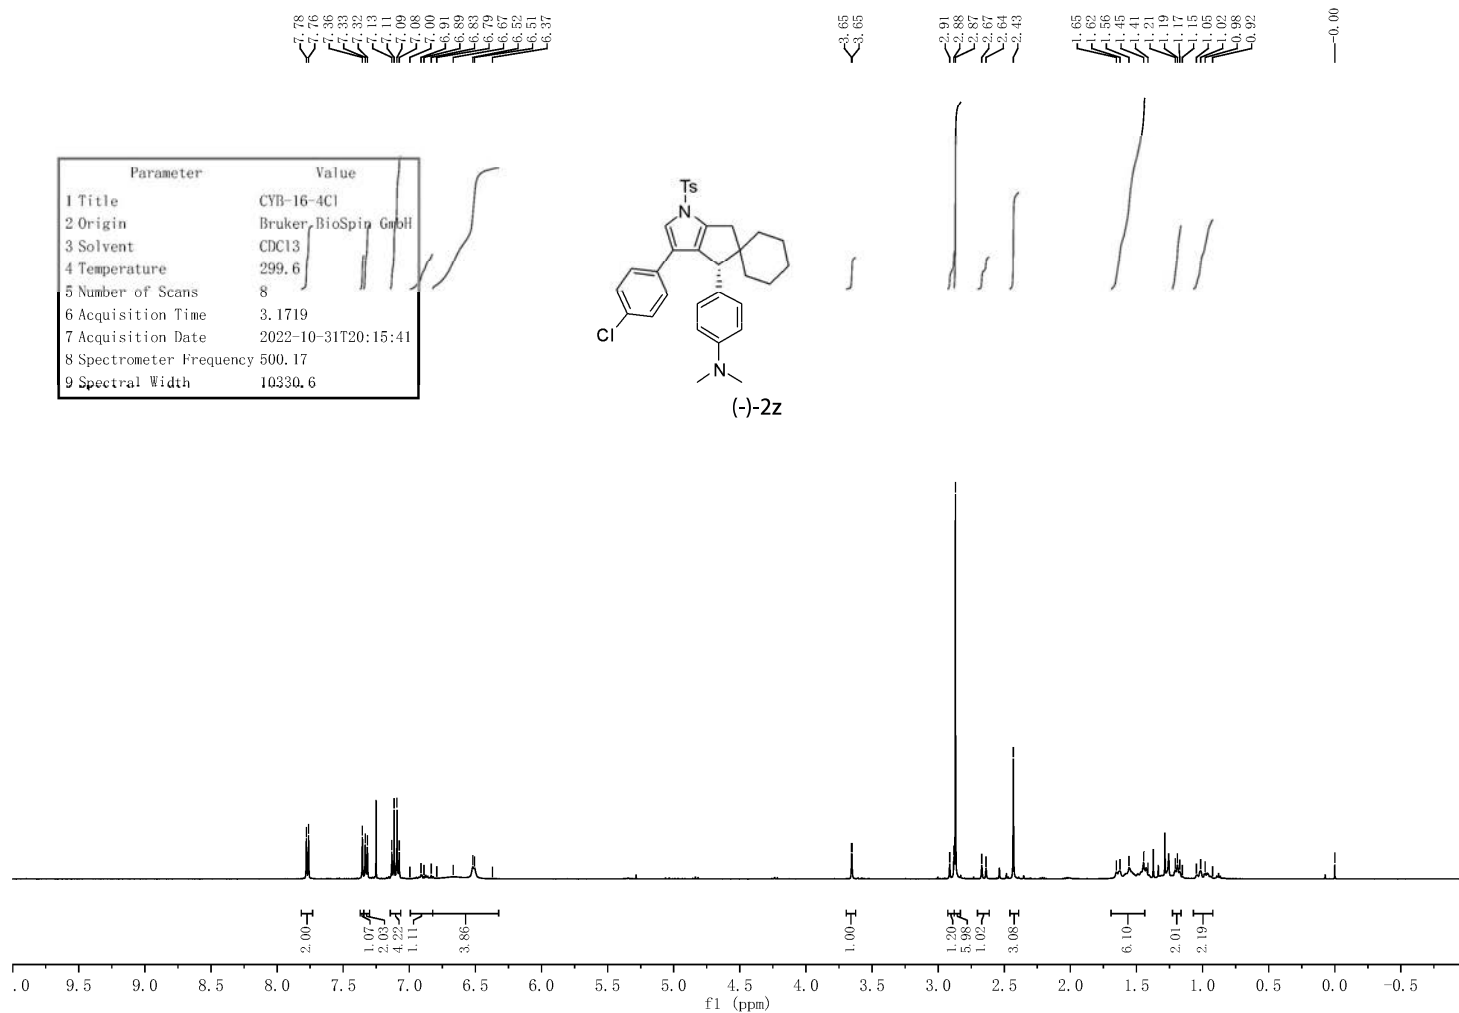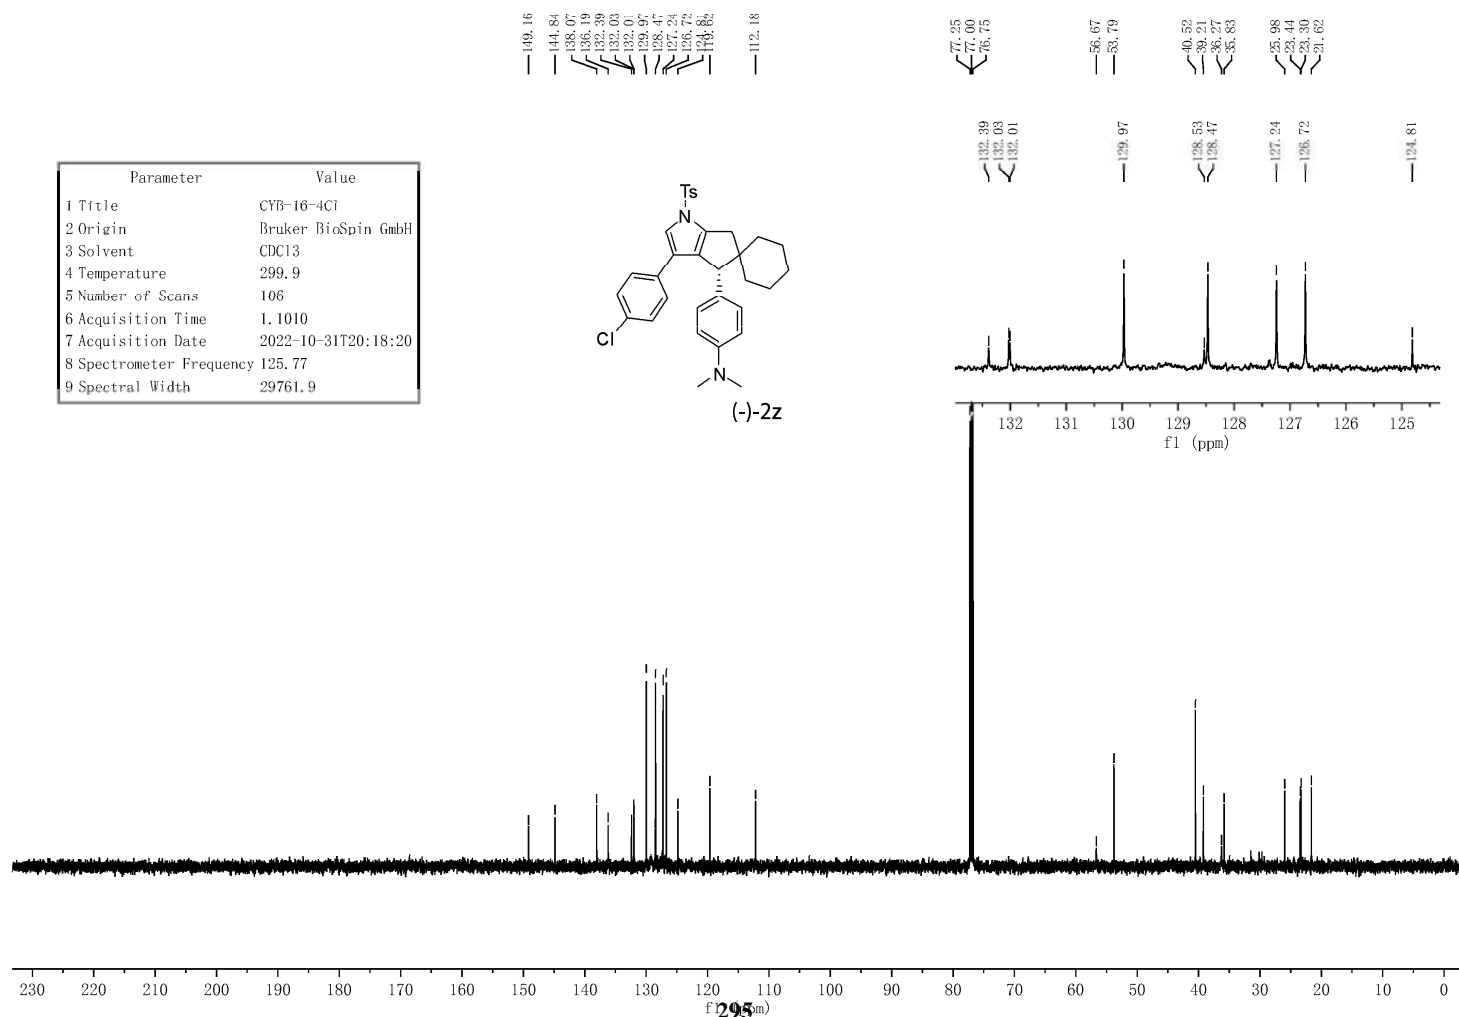

Supplementary Figure 195. <sup>1</sup>H and <sup>13</sup>C NMR spectra for (-)-2z

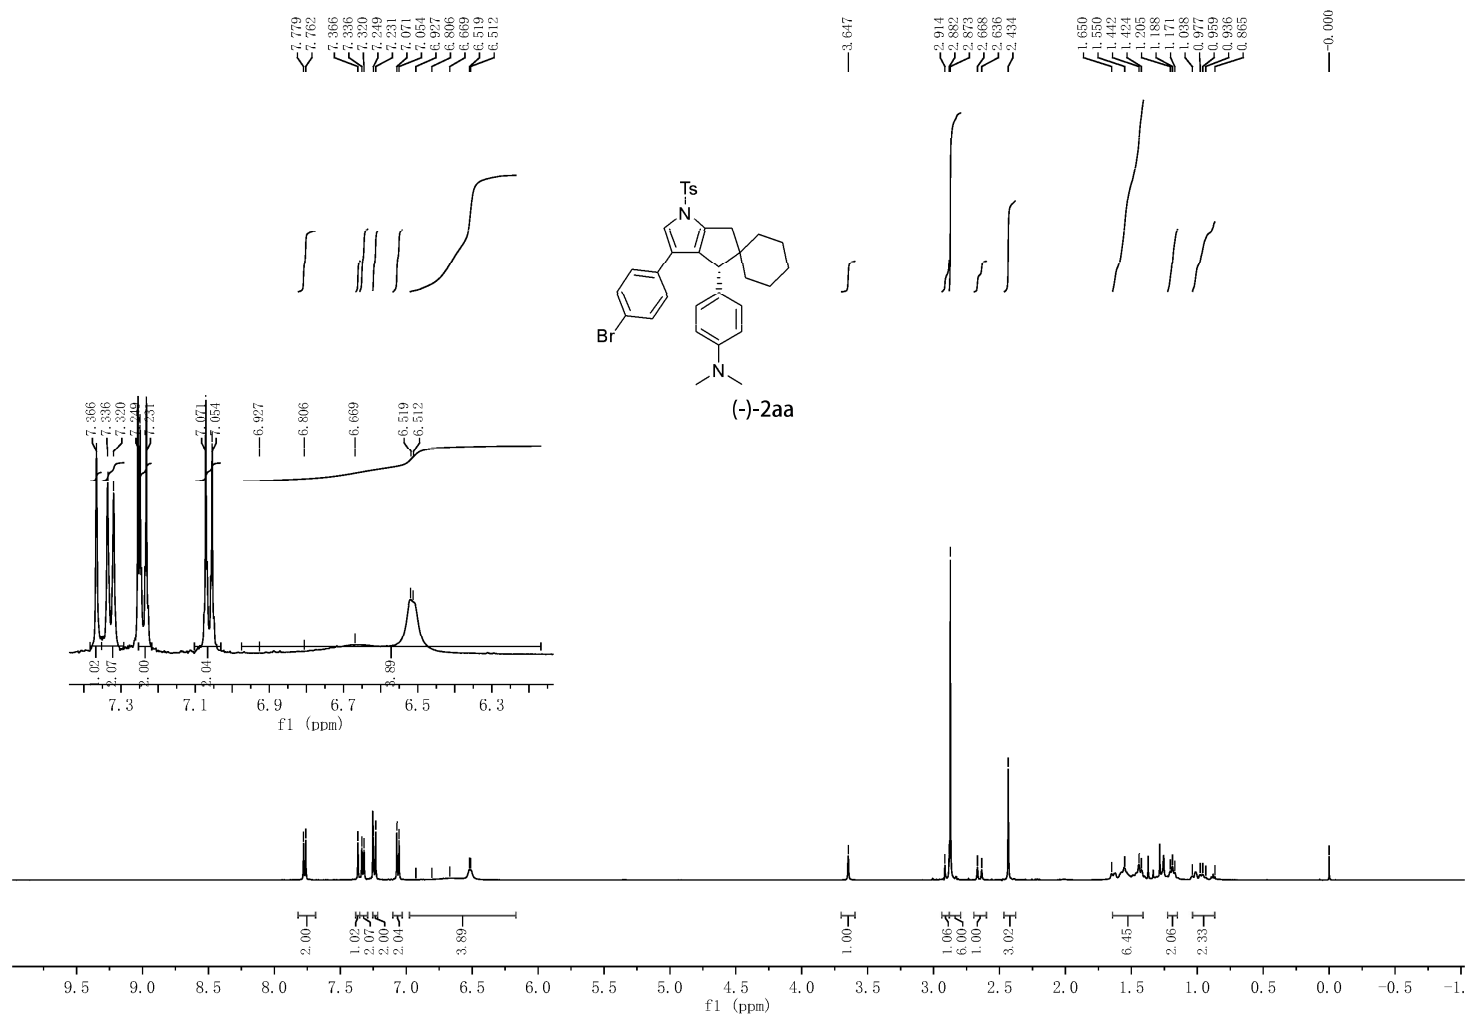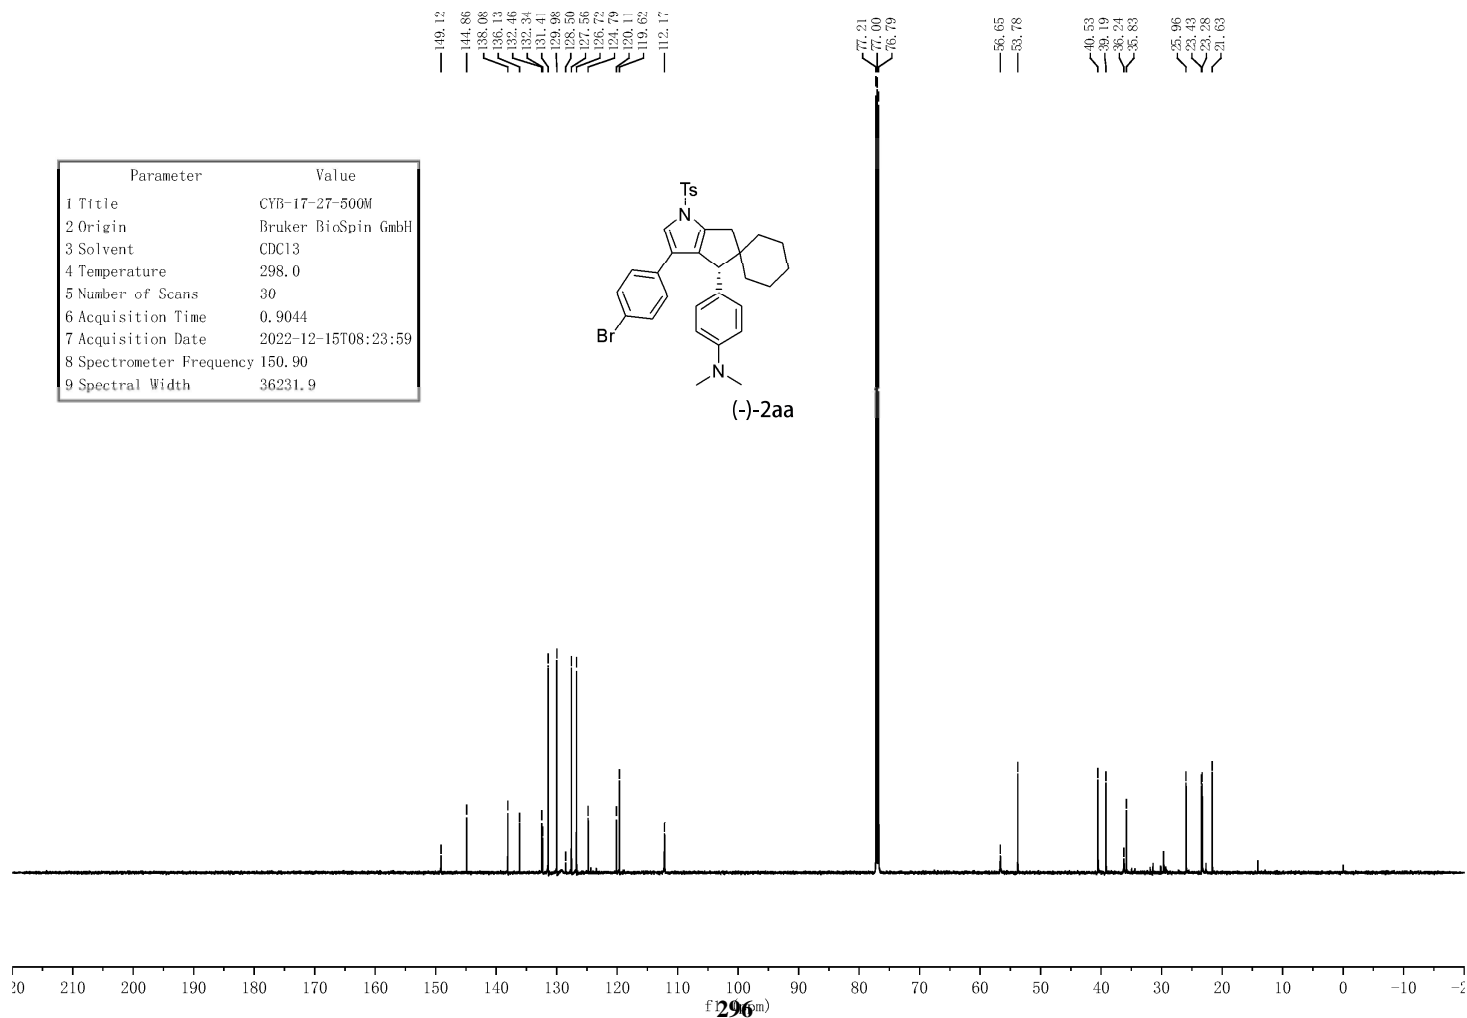

| Parameter                | Value               |
|--------------------------|---------------------|
| 1 Title                  | CYB-17-27-500M      |
| 2 Origin                 | Bruker BioSpin GmbH |
| 3 Solvent                | CDCl <sub>3</sub>   |
| 4 Temperature            | 298.0               |
| 5 Number of Scans        | 30                  |
| 6 Acquisition Time       | 0.9044              |
| 7 Acquisition Date       | 2022-12-15T08:23:59 |
| 8 Spectrometer Frequency | 150.90              |
| 9 Spectral Width         | 36231.9             |

Supplementary Figure 196. <sup>1</sup>H and <sup>13</sup>C NMR spectra for (-)-2aa



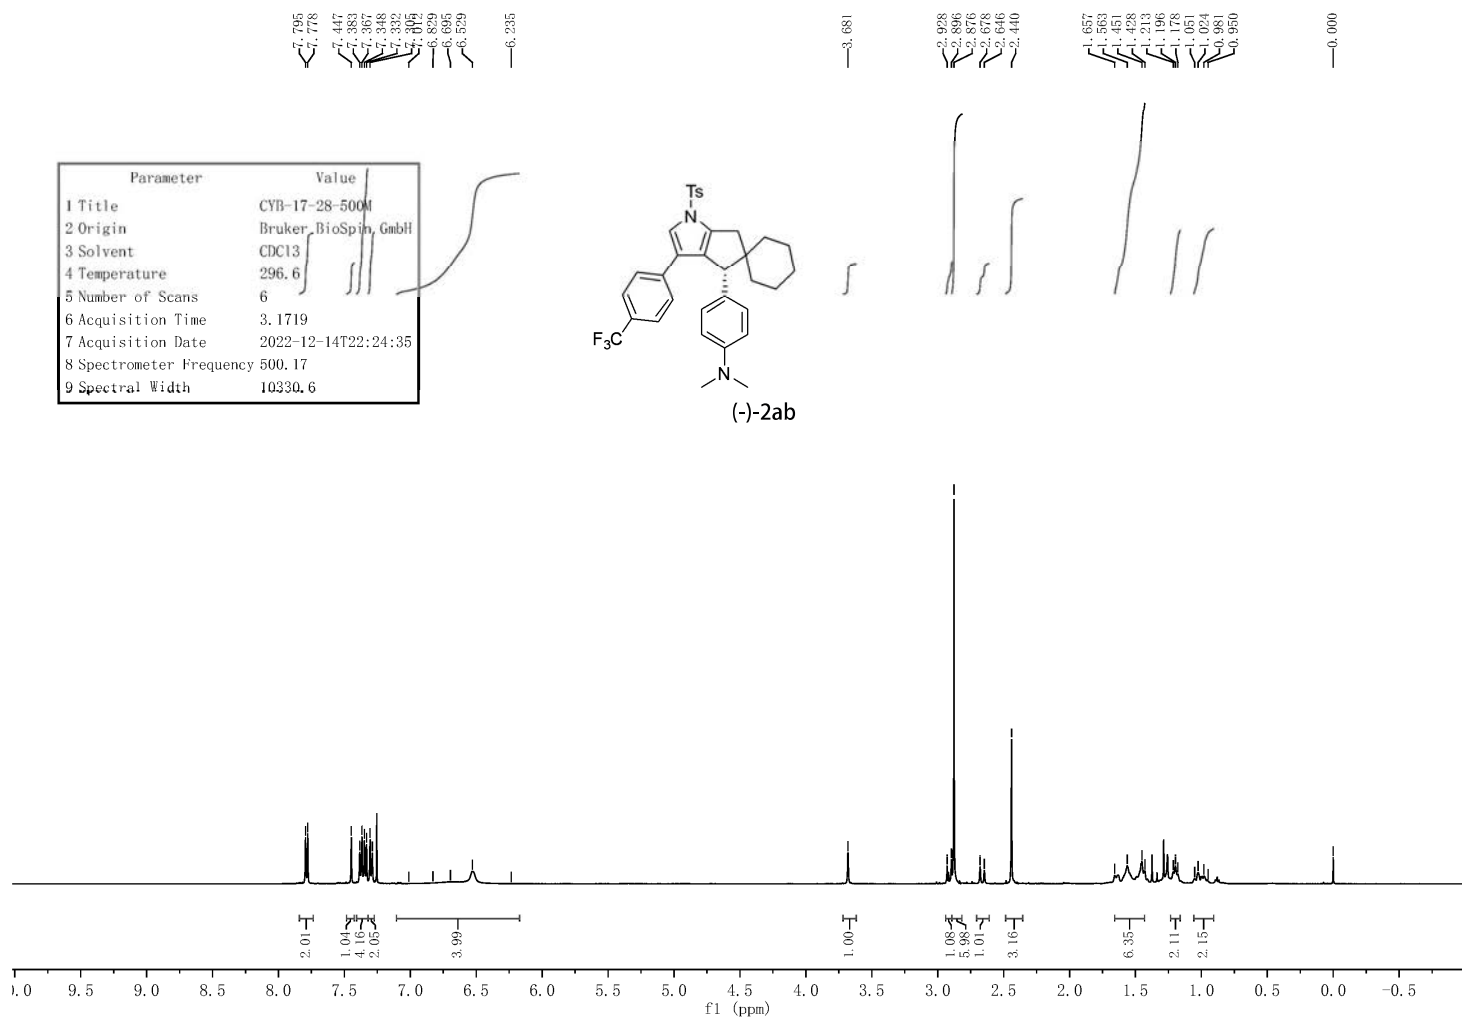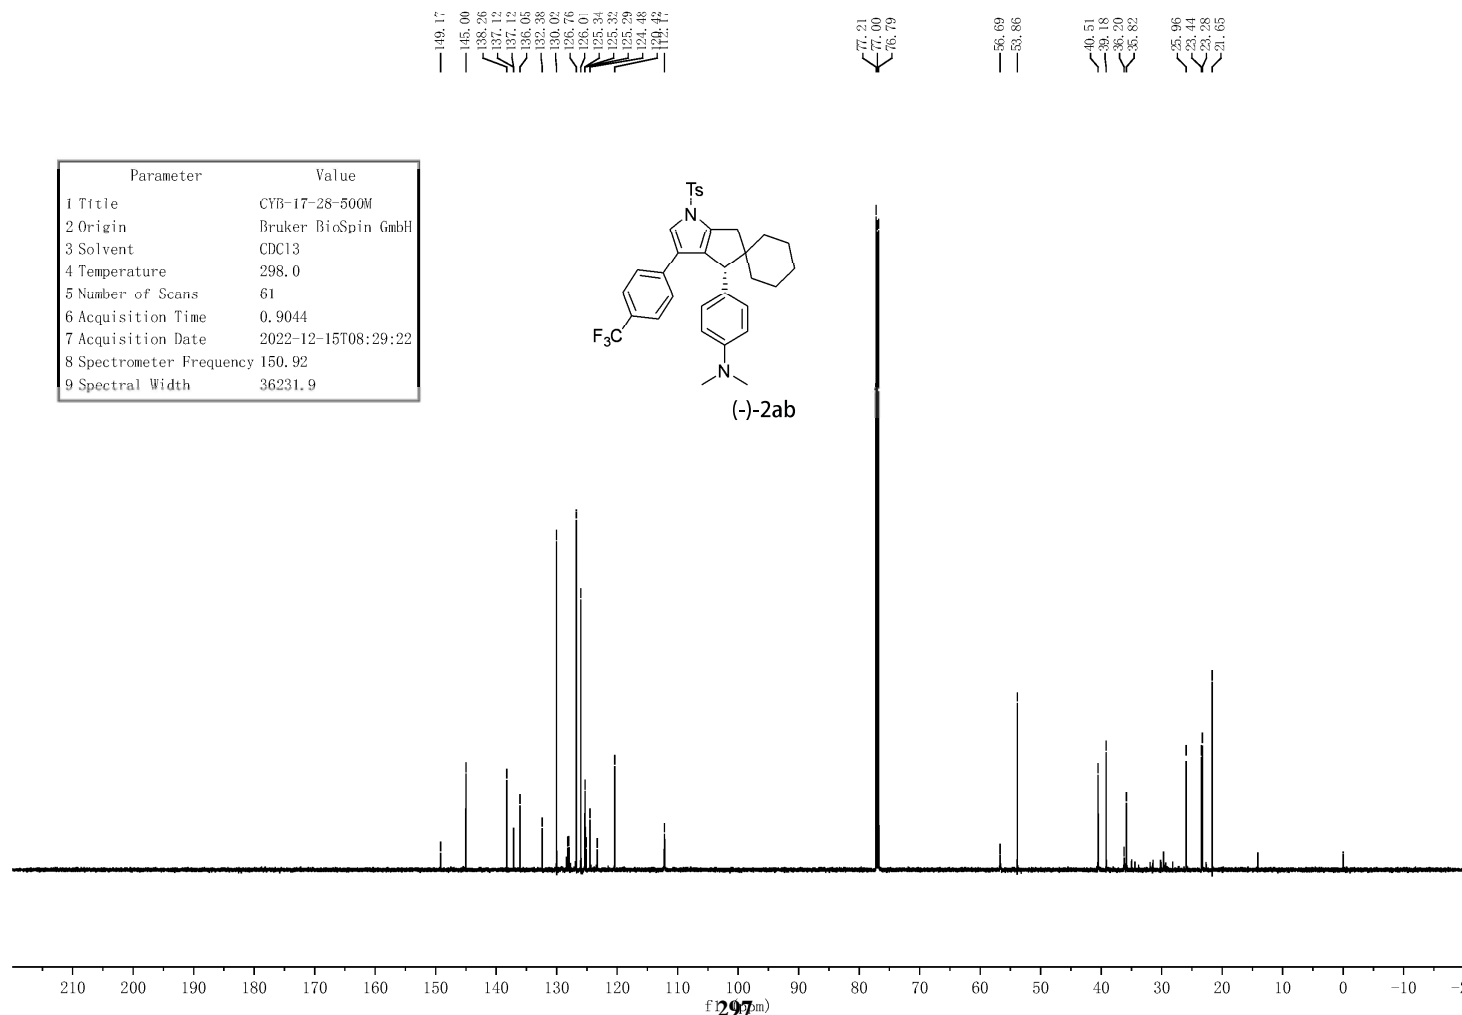

Supplementary Figure 197. <sup>1</sup>H and <sup>13</sup>C NMR spectra for (-)-2ab

-62.47

| Parameter                | Value               |
|--------------------------|---------------------|
| 1 Title                  | CVR-20230626-CF3    |
| 2 Origin                 | Bruker BioSpin GmbH |
| 3 Solvent                | CDCl3               |
| 4 Temperature            | 295.7               |
| 5 Number of Scans        | 30                  |
| 6 Acquisition Time       | 0.7340              |
| 7 Acquisition Date       | 2023-06-26T17:16:57 |
| 8 Spectrometer Frequency | 376.31              |
| 9 Spectral Width         | 89285.7             |

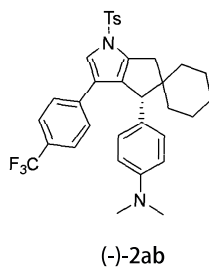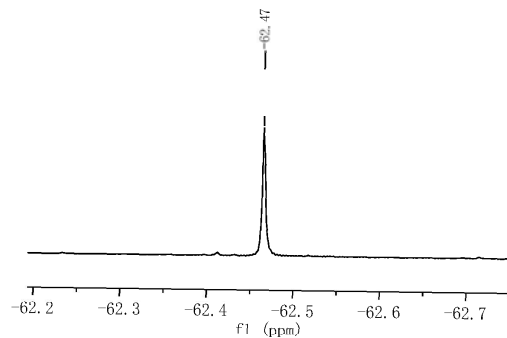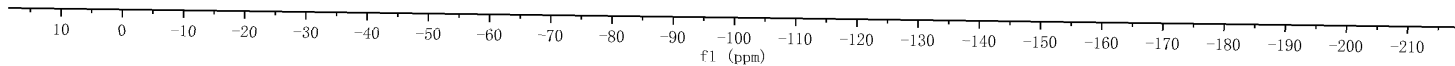

Supplementary Figure 198. <sup>19</sup>F NMR spectra for (-)-2ab

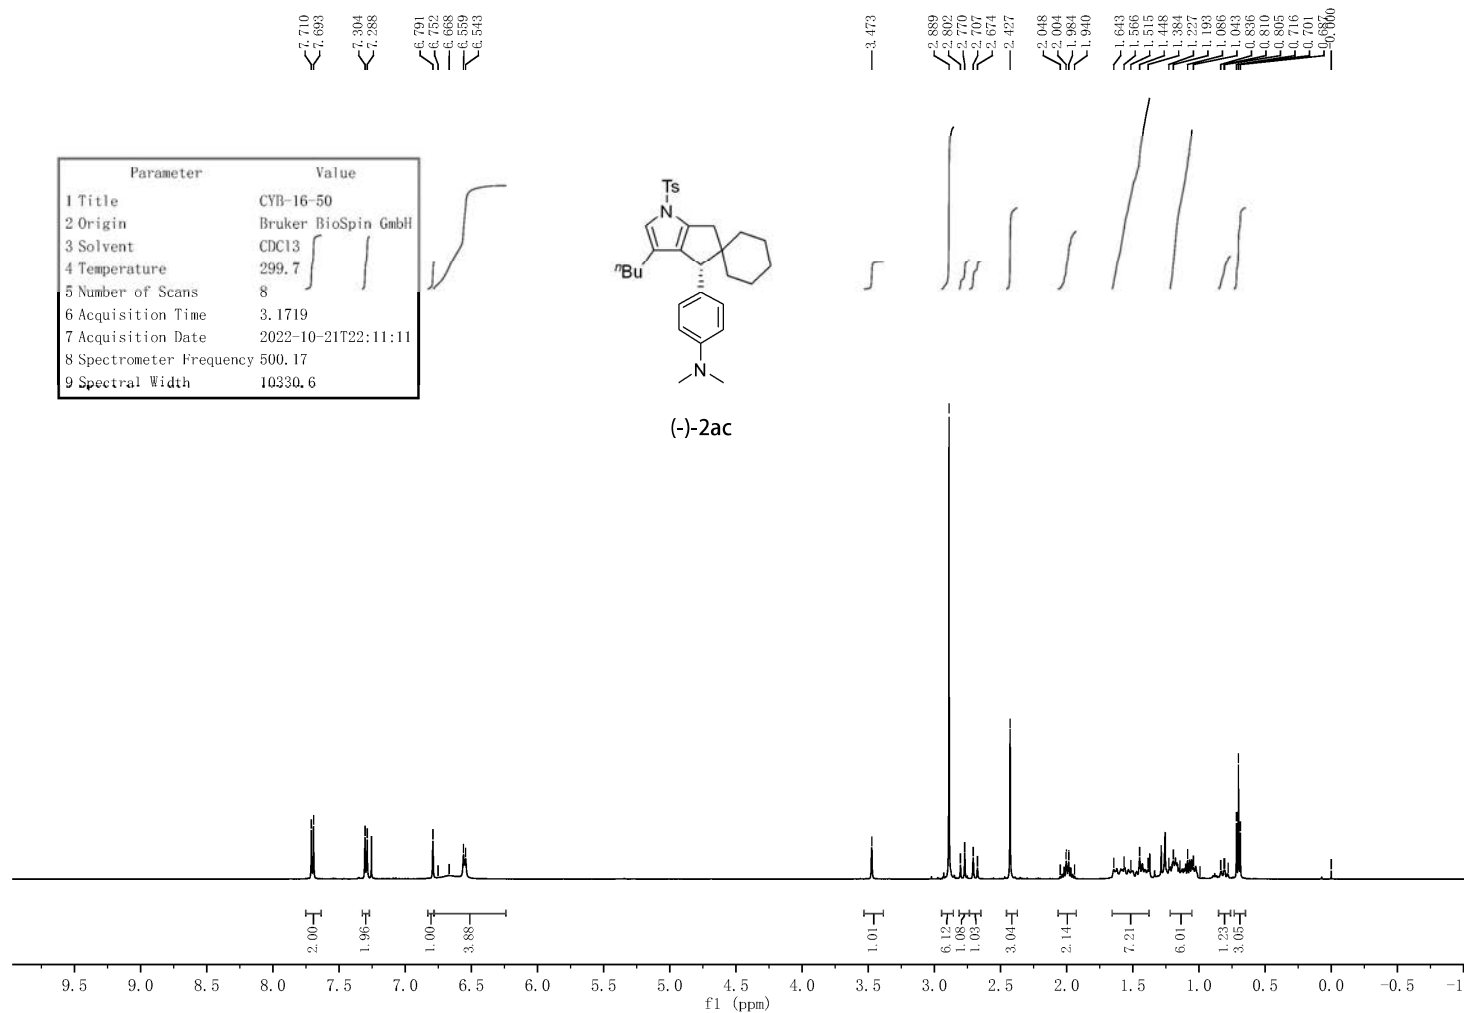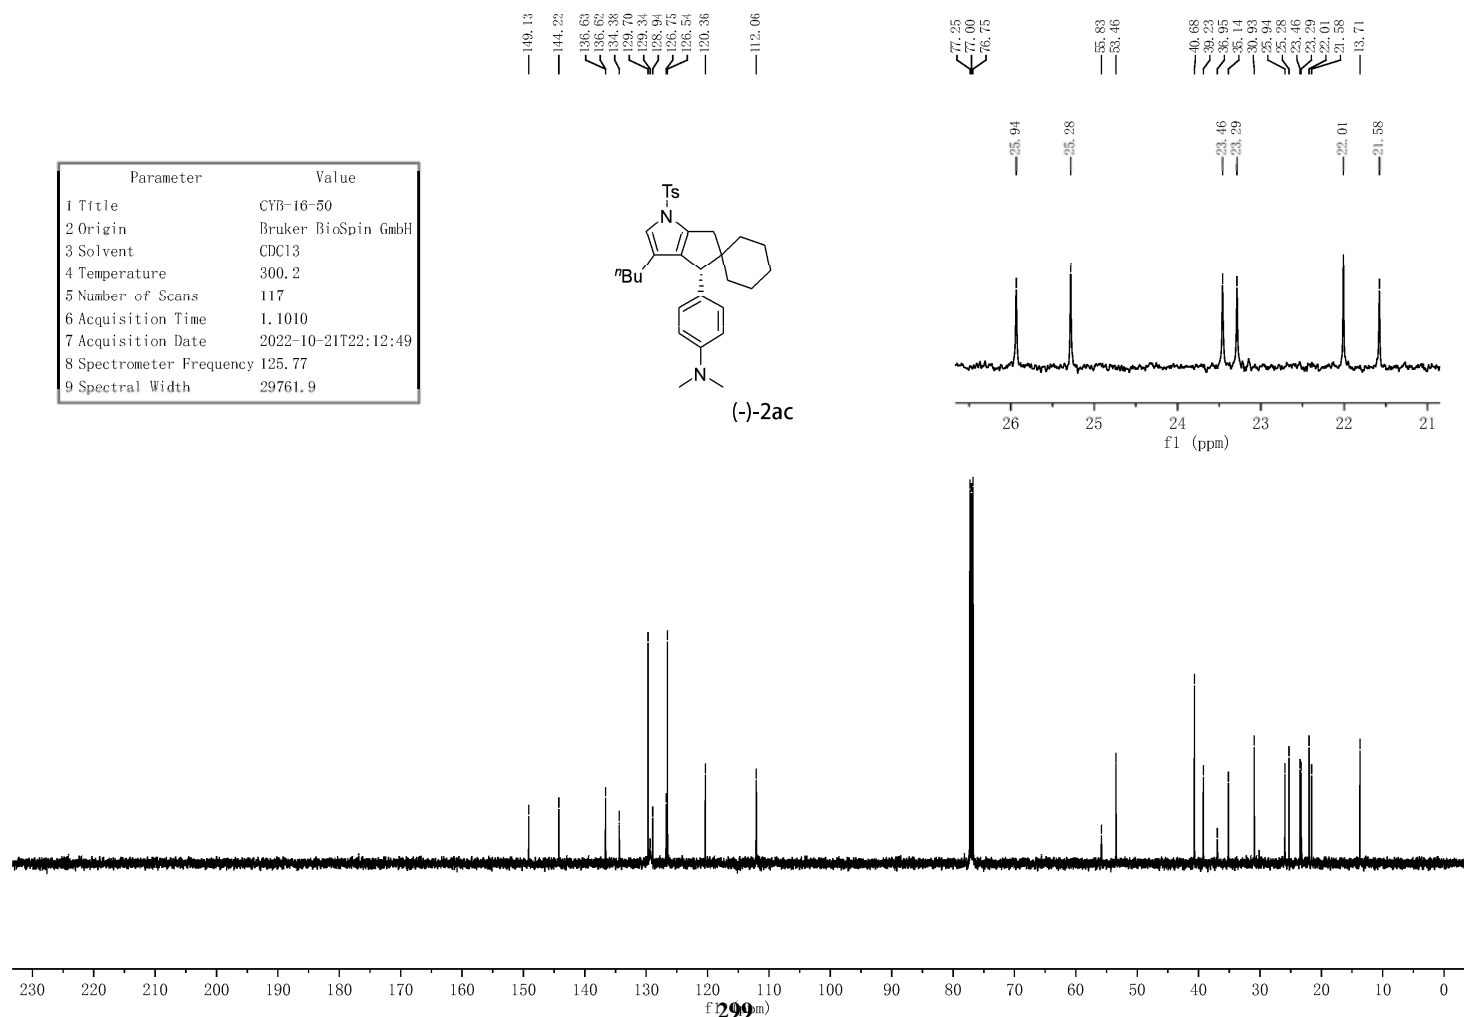

Supplementary Figure 199. <sup>1</sup>H and <sup>13</sup>C NMR spectra for (-)-2ac

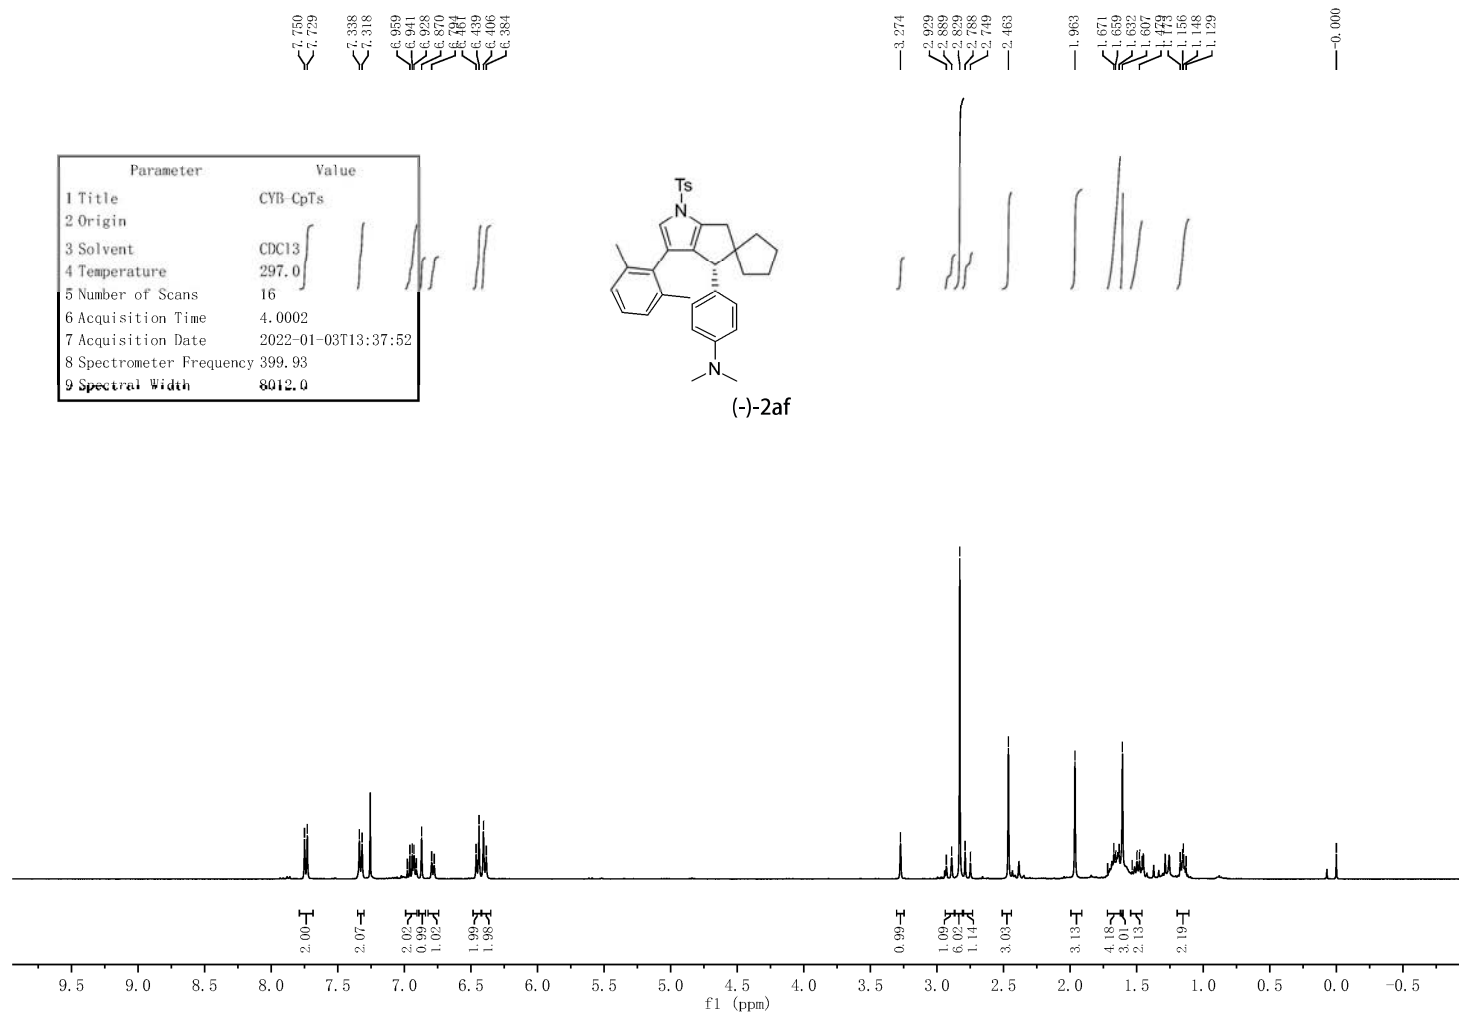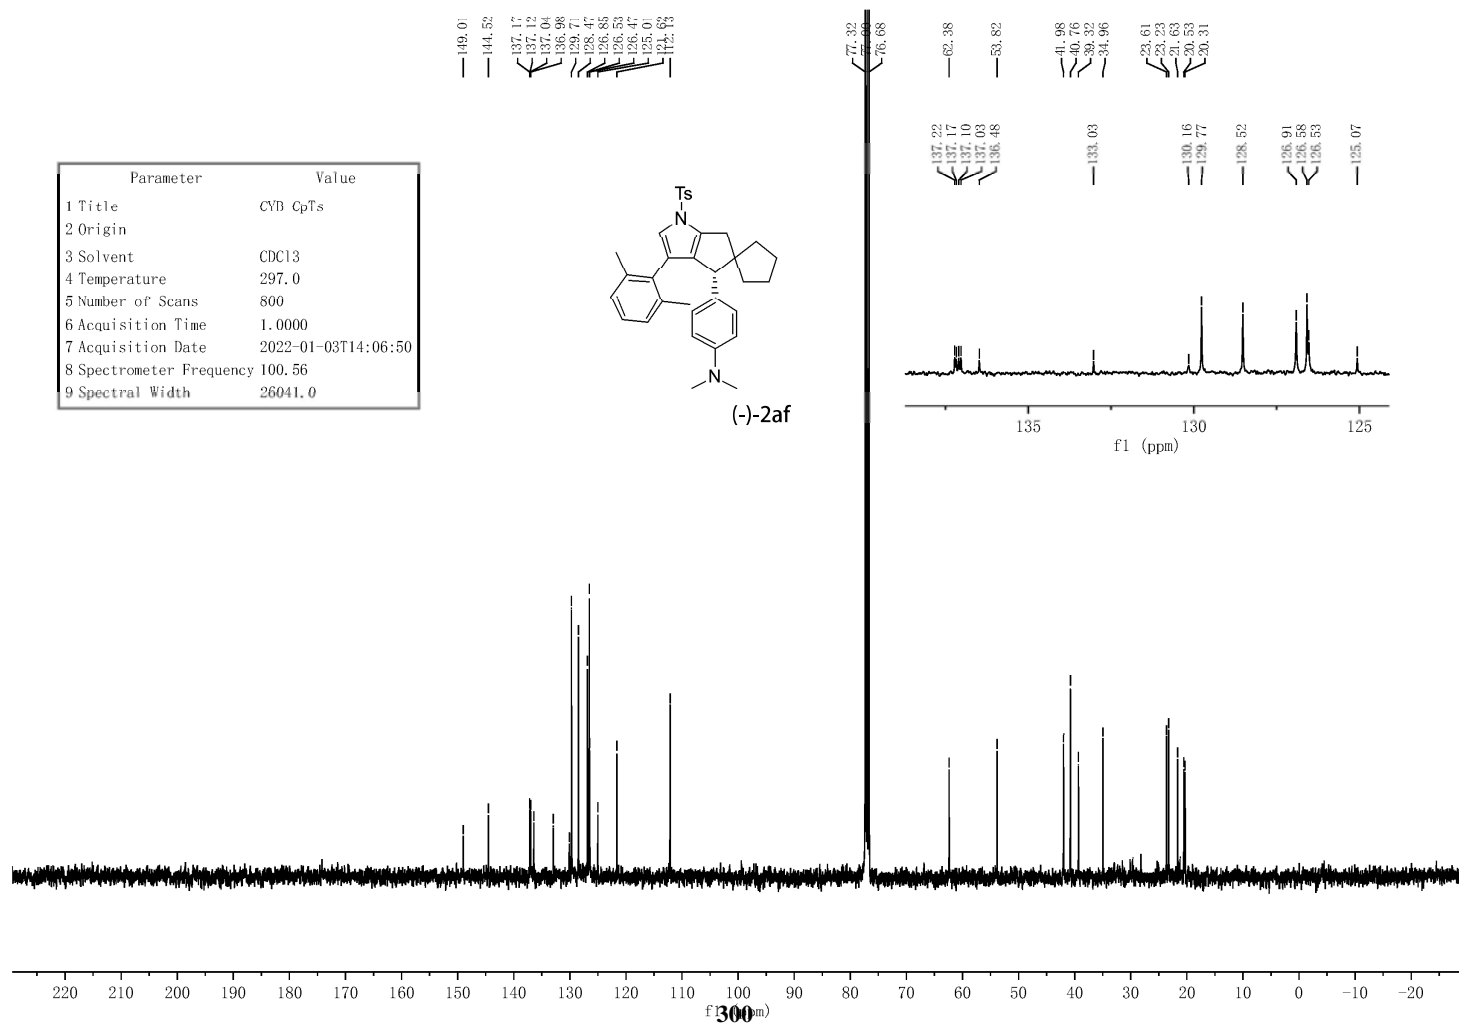

Supplementary Figure 200.  $^1\text{H}$  and  $^{13}\text{C}$  NMR spectra for (-)-2af

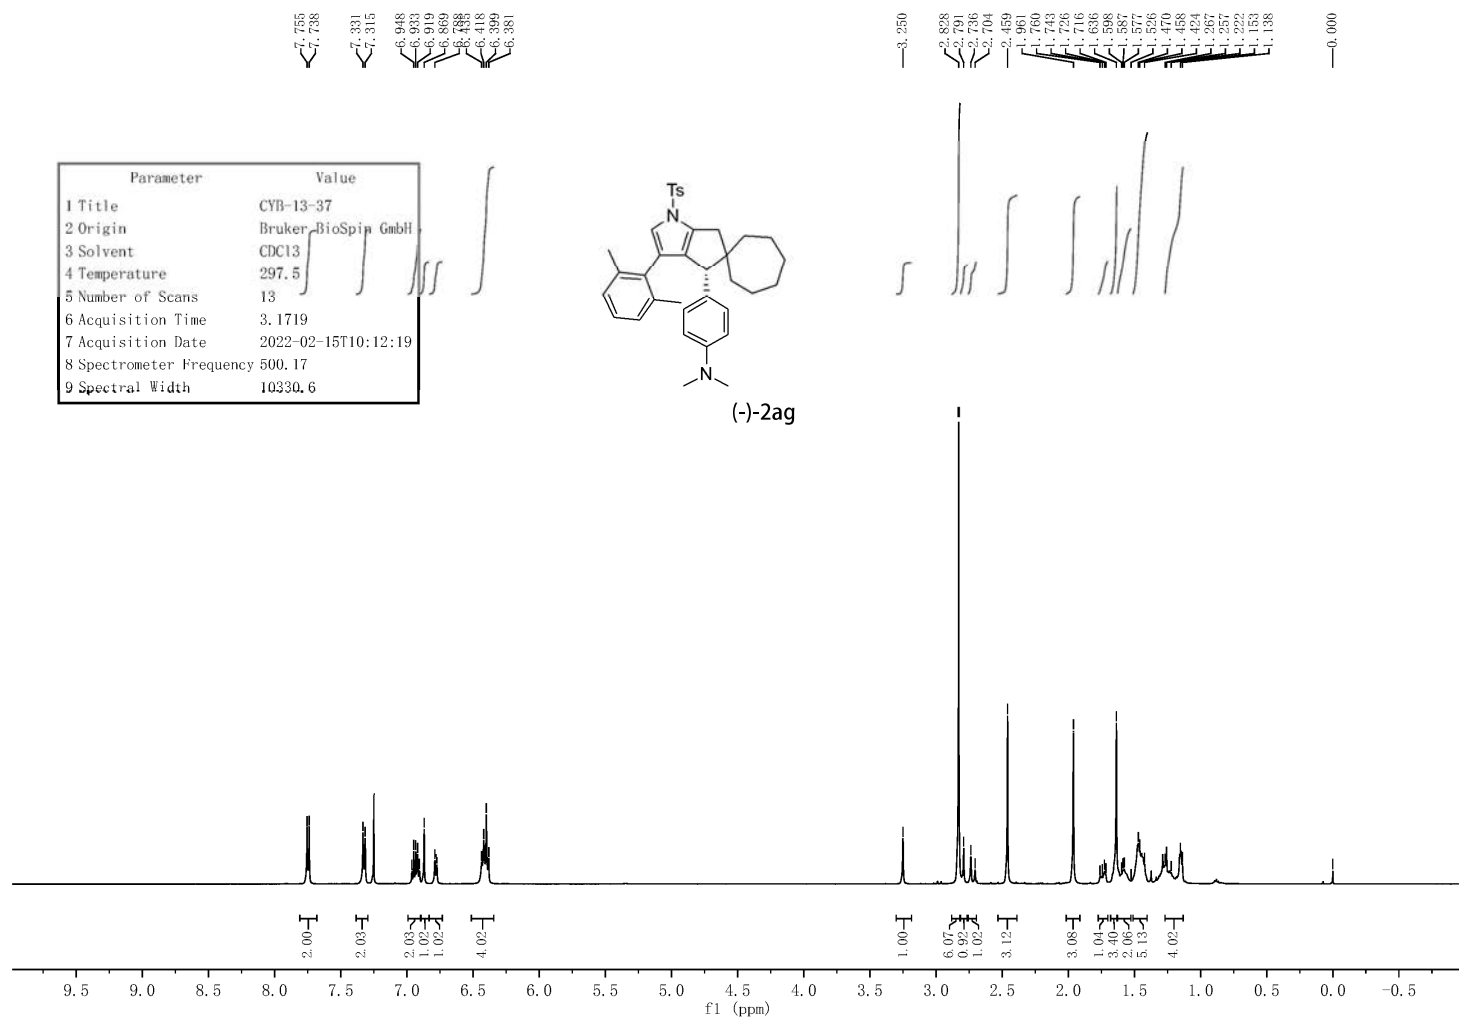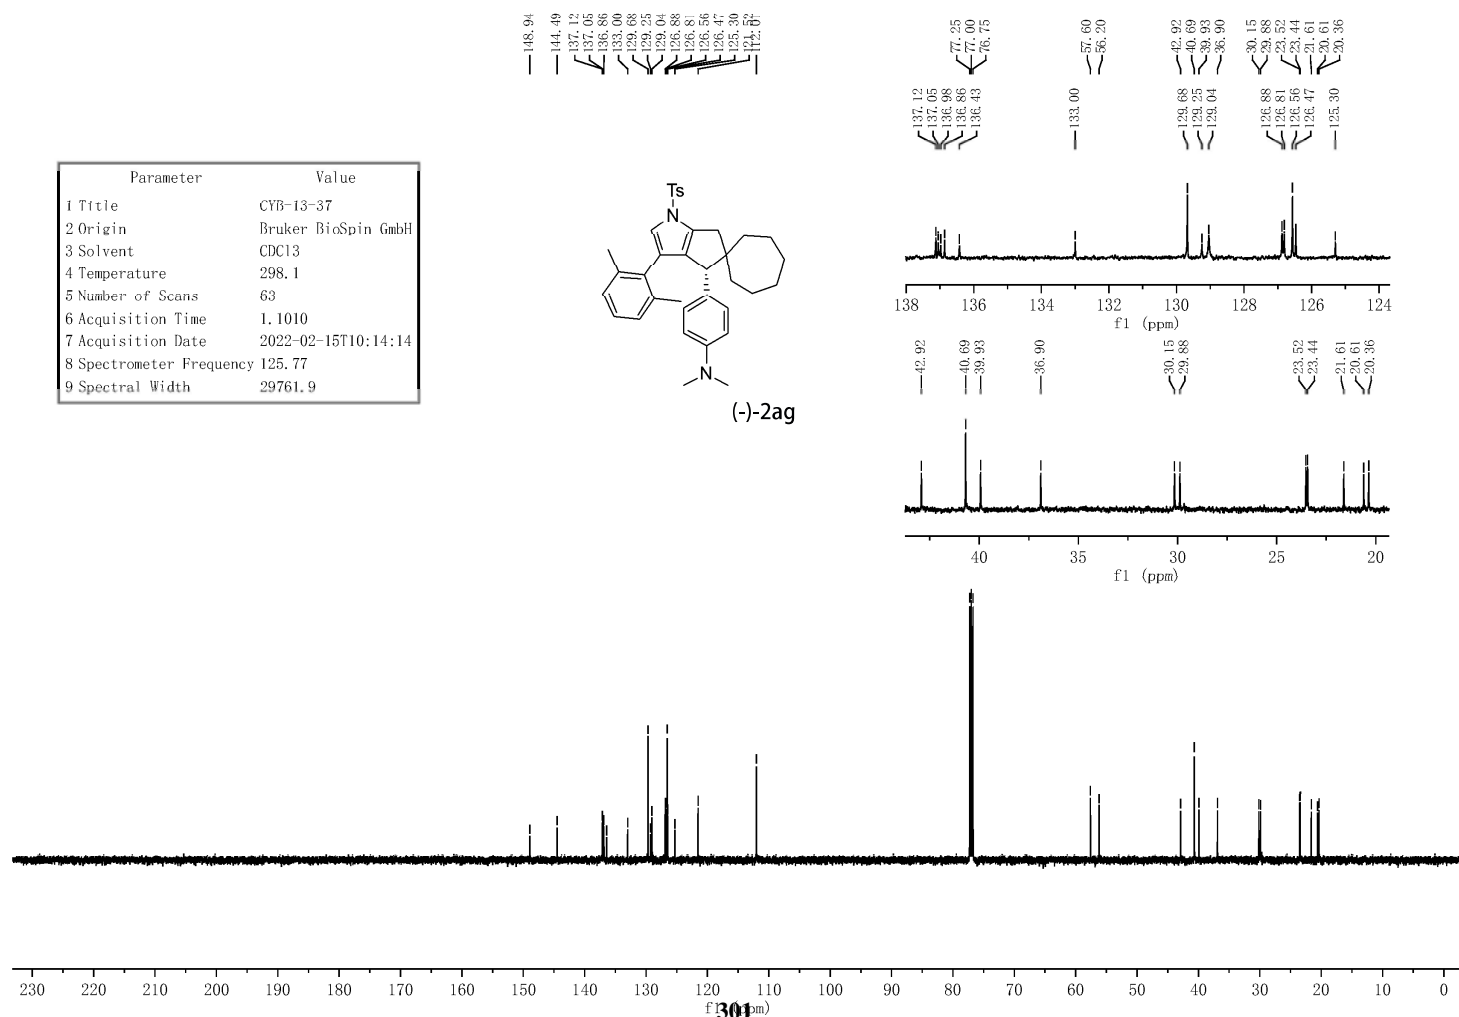

Supplementary Figure 201. <sup>1</sup>H and <sup>13</sup>C NMR spectra for (-)-2ag

7.751  
7.730  
7.331  
7.311  
6.944  
6.926  
6.855  
6.772  
6.758  
6.425  
6.400  
6.377

3.280  
2.826  
2.805  
2.765  
2.732  
2.692  
2.655  
1.776  
1.739  
1.719  
1.689  
1.610  
1.554  
1.523  
1.488  
1.441  
1.425  
1.335  
1.296  
1.285  
1.269  
0.000

| Parameter                | Value               |
|--------------------------|---------------------|
| 1 Title                  | CYB-13-120          |
| 2 Origin                 | Bruker BioSpin GmbH |
| 3 Solvent                | CDCl3               |
| 4 Temperature            | 298.0               |
| 5 Number of Scans        | 9                   |
| 6 Acquisition Time       | 4.0894              |
| 7 Acquisition Date       | 2022-03-15T10:46:15 |
| 8 Spectrometer Frequency | 400.13              |
| 9 Spectral Width         | 8012.8              |

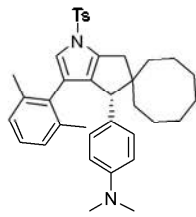

(-)-2ah

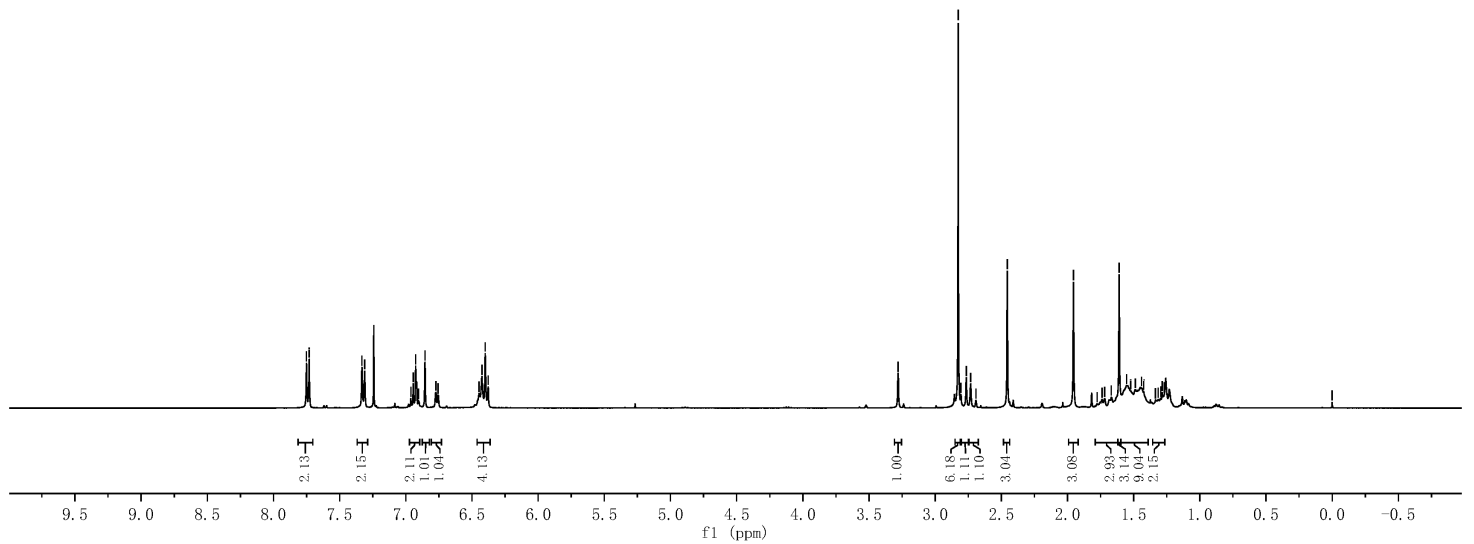

148.89  
144.45  
137.22  
136.91  
136.72  
132.97  
129.67  
129.36  
129.17  
128.86  
128.59  
128.43  
128.42  
125.37  
121.56

77.32  
77.00  
76.68  
57.49  
54.25  
40.68  
39.31  
36.48  
36.63  
36.46  
25.12  
23.61  
23.35  
21.59  
20.53  
20.30

| Parameter                | Value               |
|--------------------------|---------------------|
| 1 Title                  | CYB-13-120          |
| 2 Origin                 | Bruker BioSpin GmbH |
| 3 Solvent                | CDCl3               |
| 4 Temperature            | 300.0               |
| 5 Number of Scans        | 74                  |
| 6 Acquisition Time       | 1.3631              |
| 7 Acquisition Date       | 2022-03-15T10:47:56 |
| 8 Spectrometer Frequency | 100.61              |
| 9 Spectral Width         | 24038.5             |

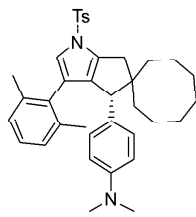

(-)-2ah

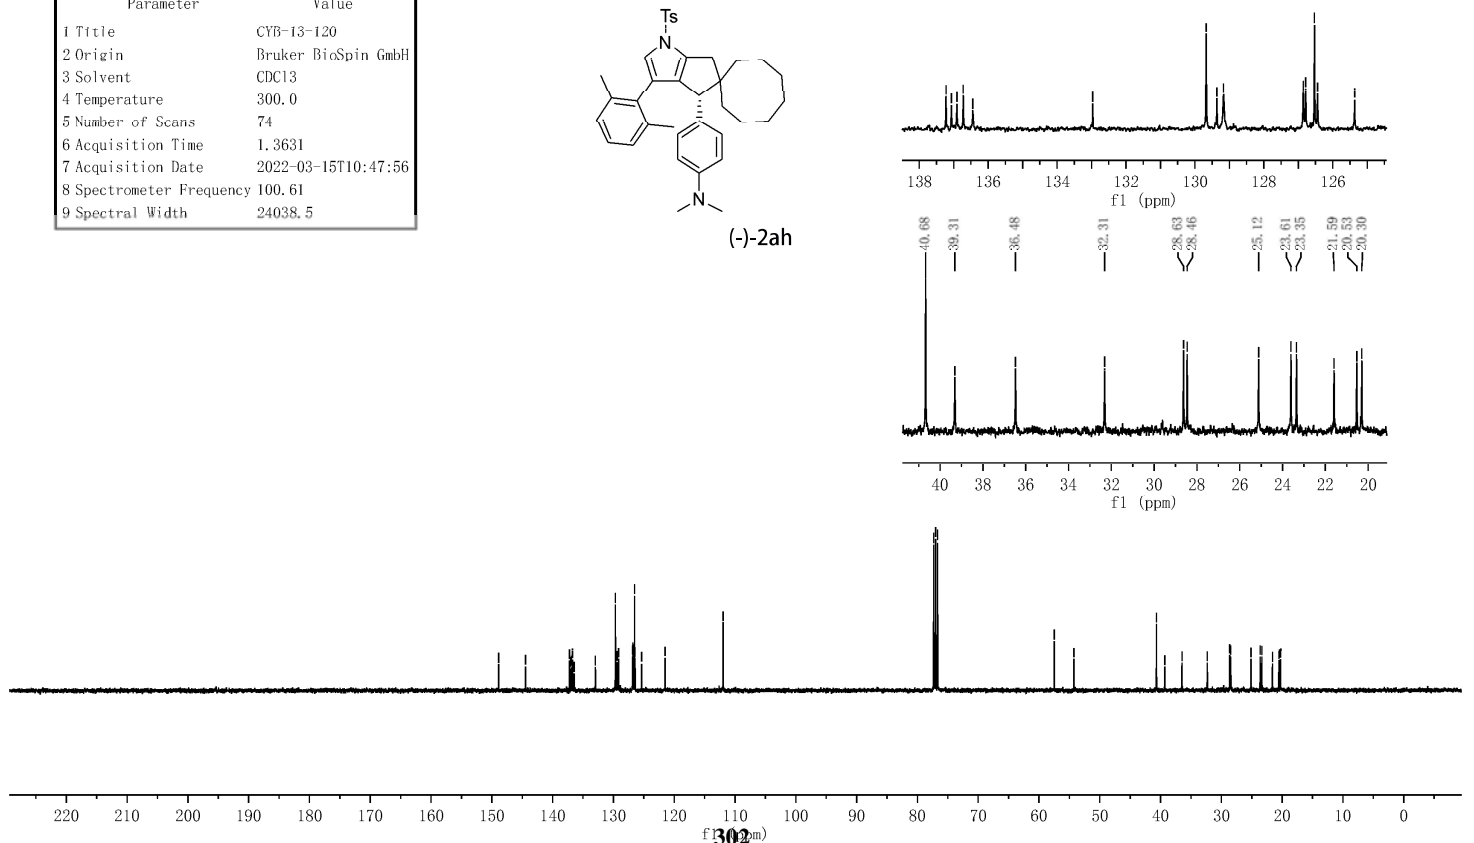

Supplementary Figure 202. <sup>1</sup>H and <sup>13</sup>C NMR spectra for (-)-2ah

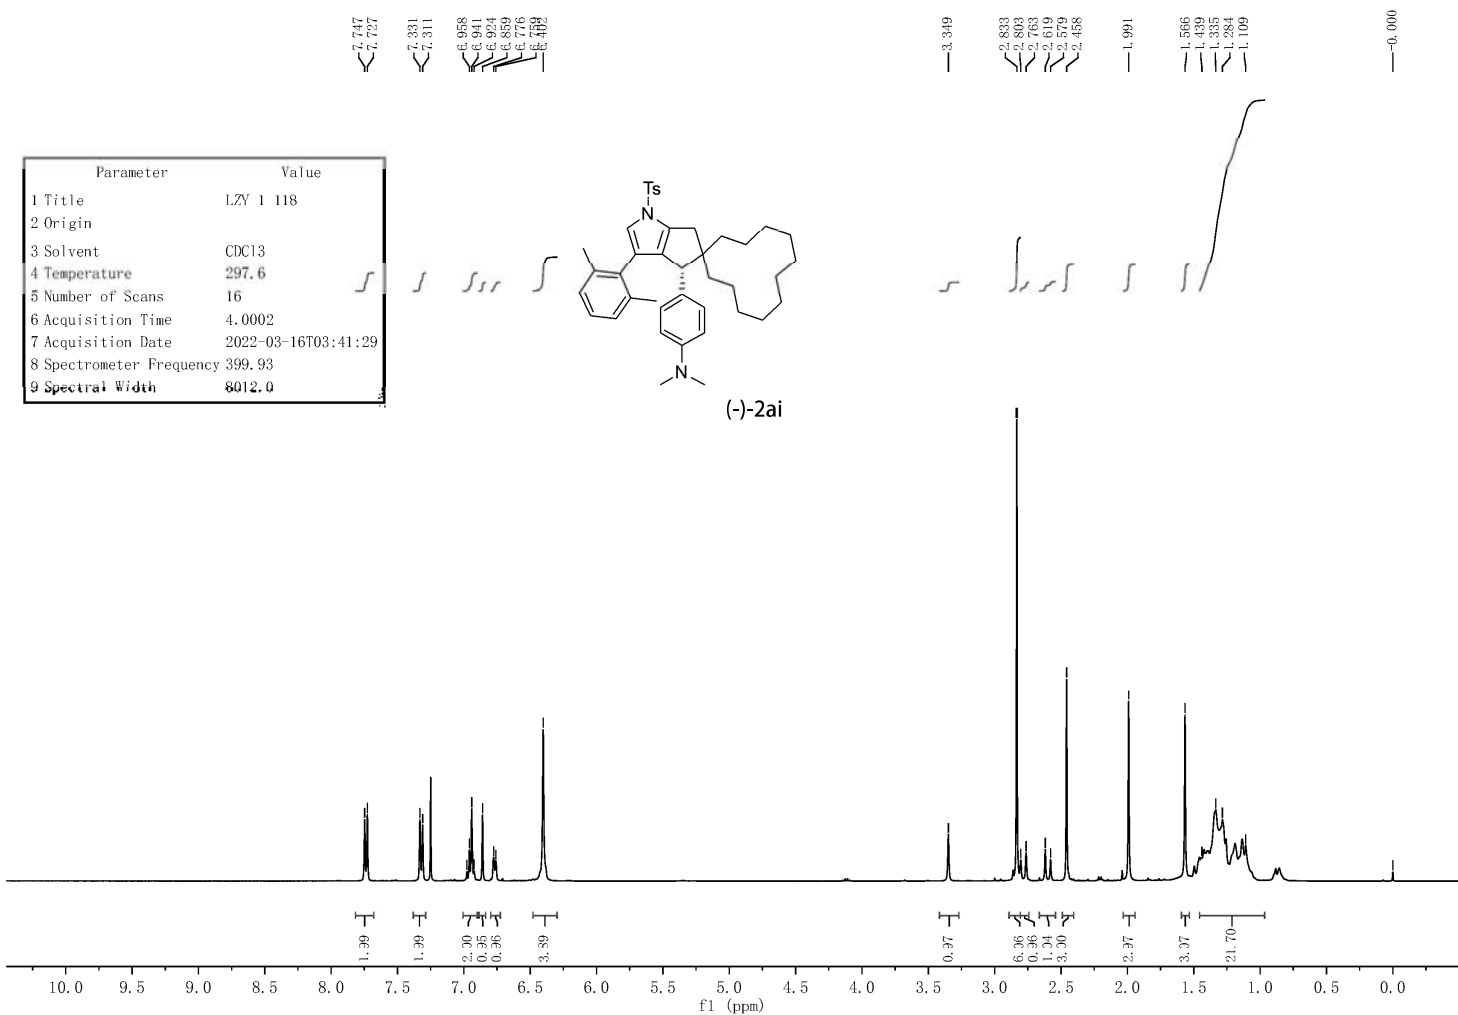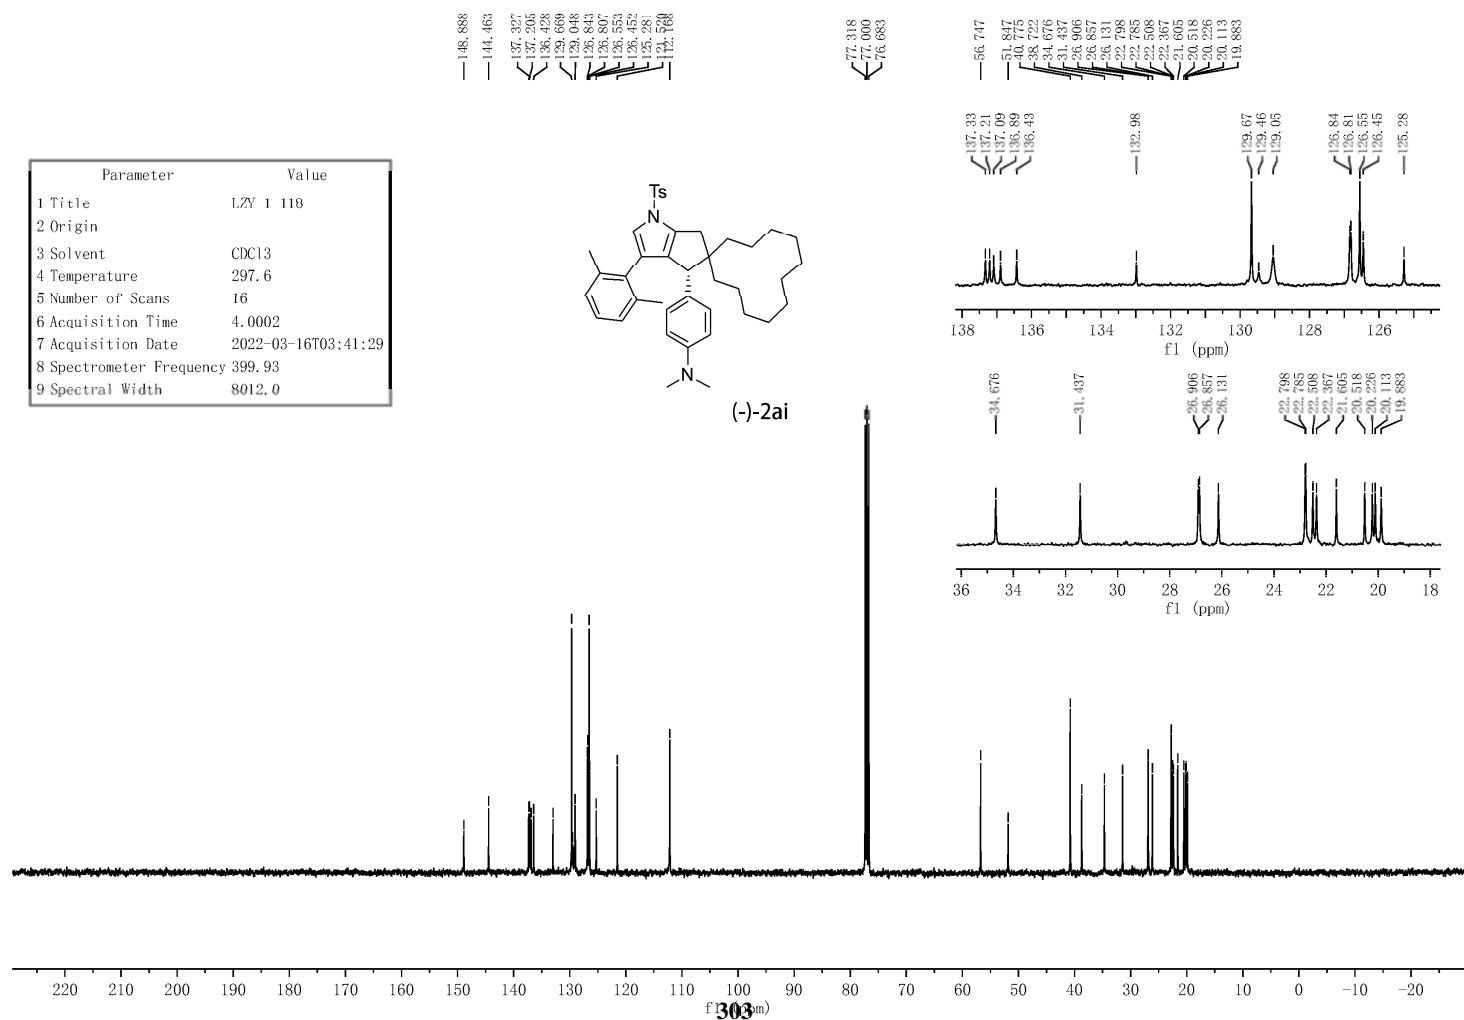

Supplementary Figure 203. <sup>1</sup>H and <sup>13</sup>C NMR spectra for (-)-2ai

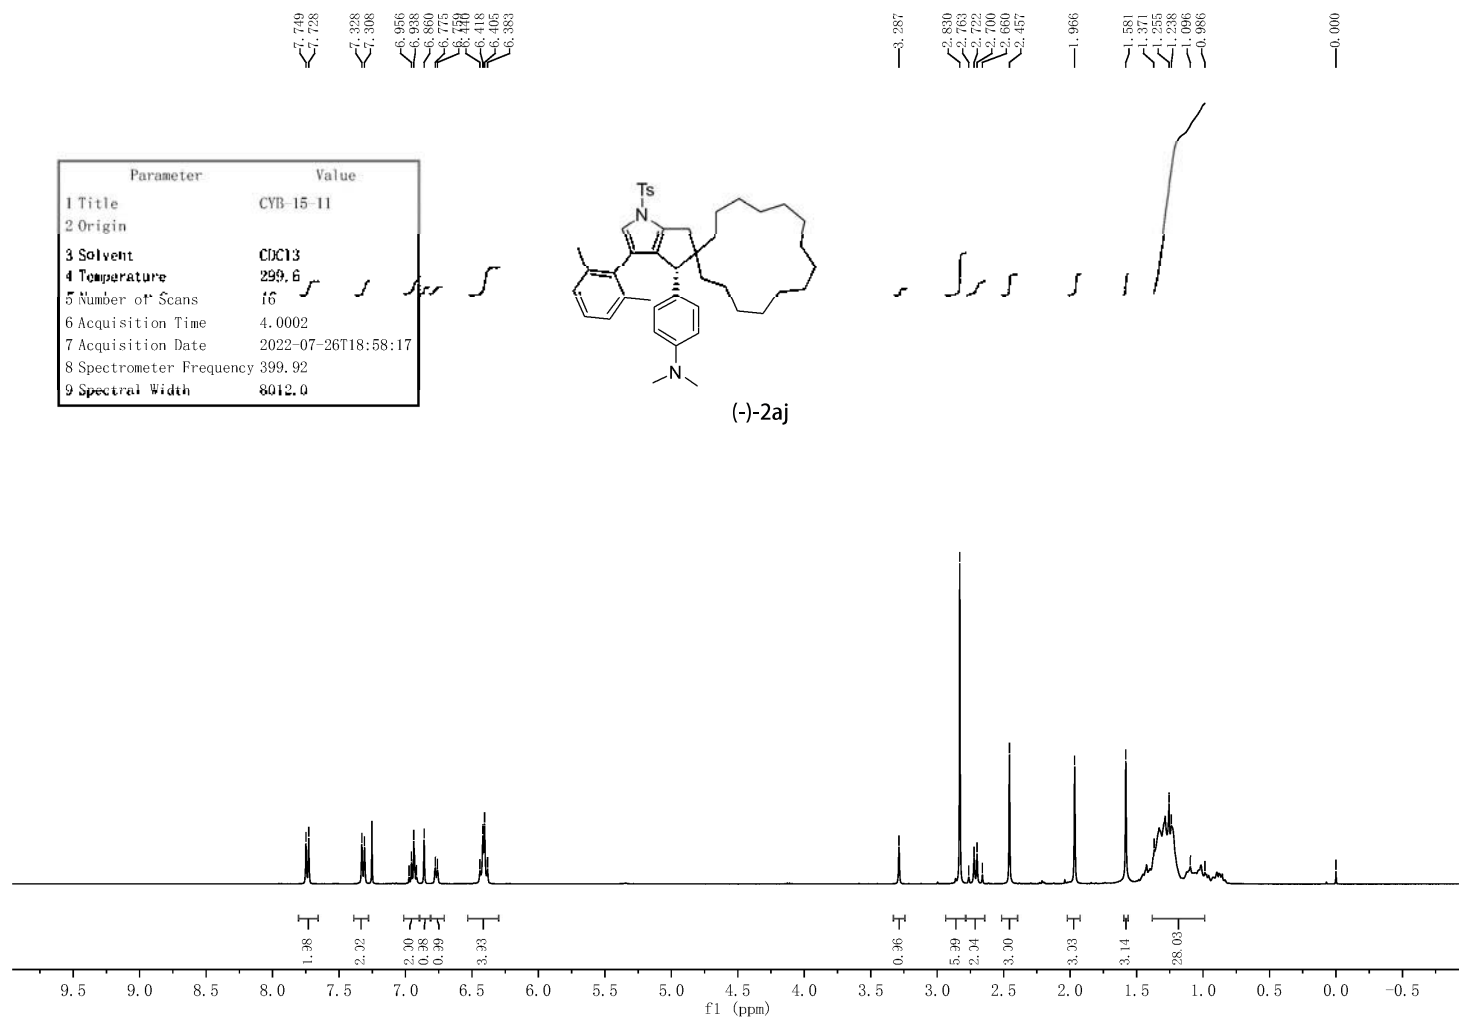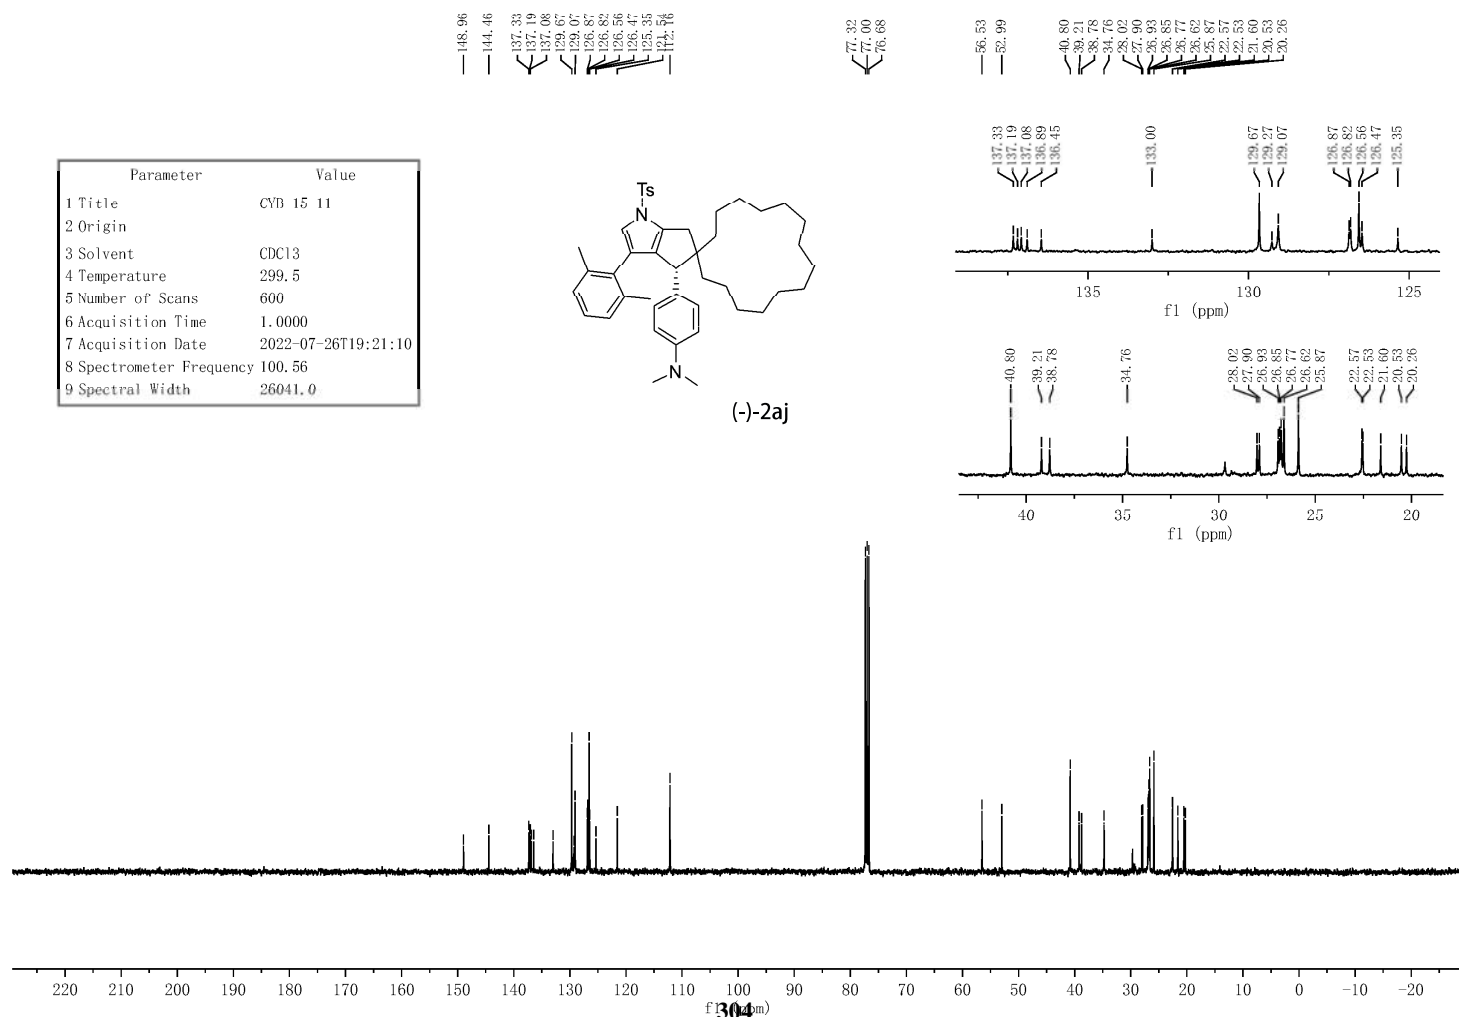

Supplementary Figure 204. <sup>1</sup>H and <sup>13</sup>C NMR spectra for (-)-2aj



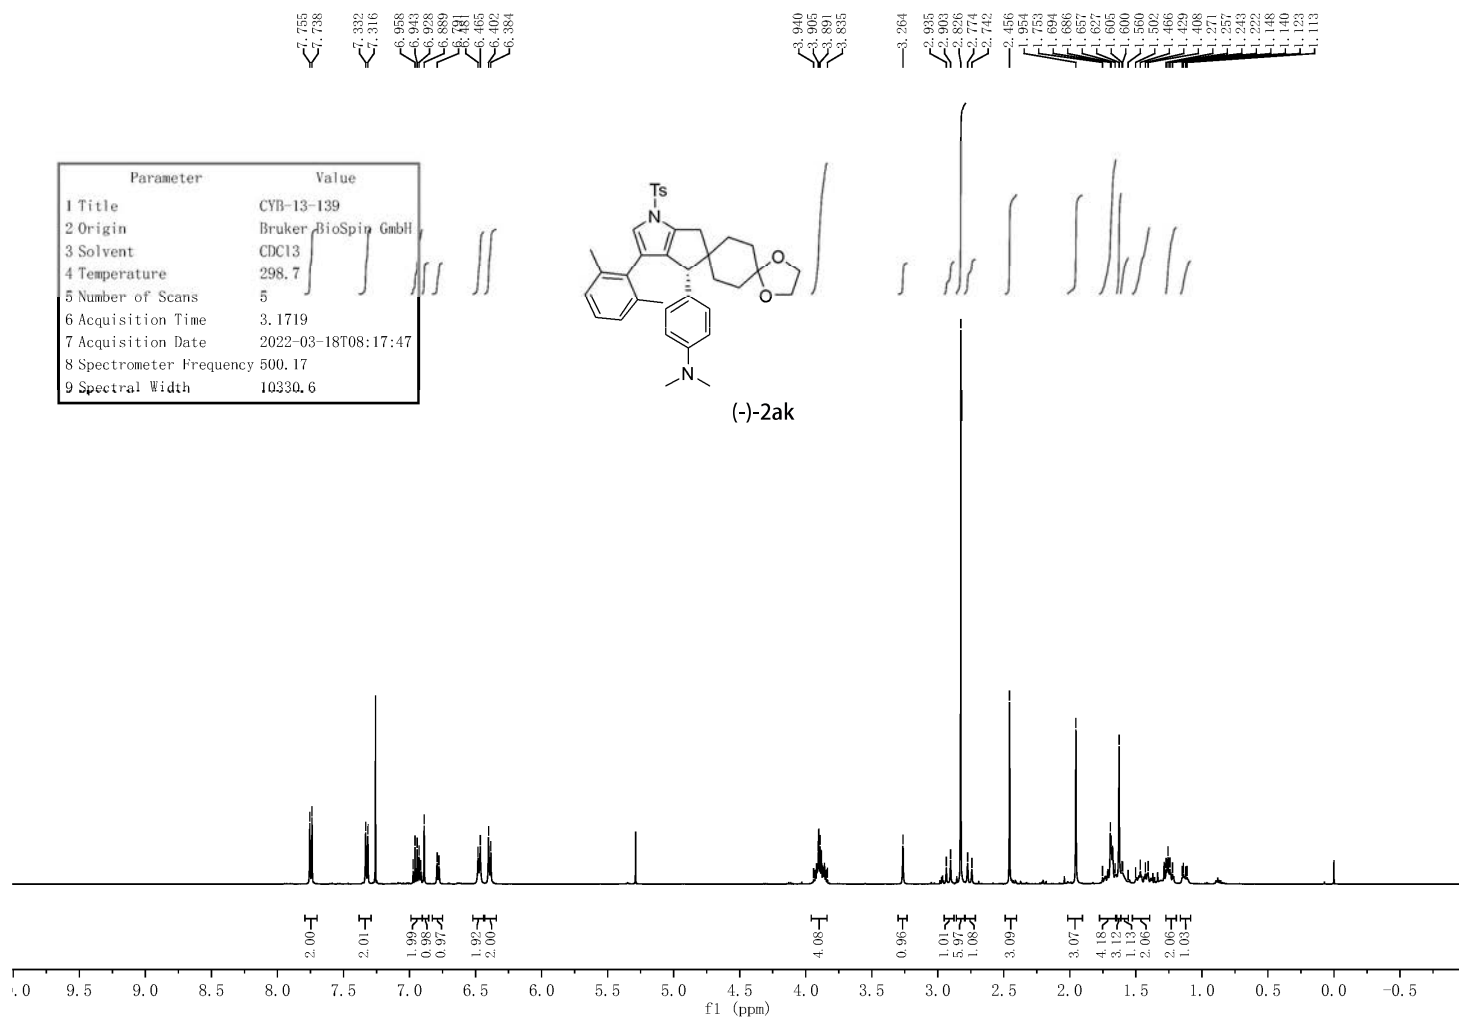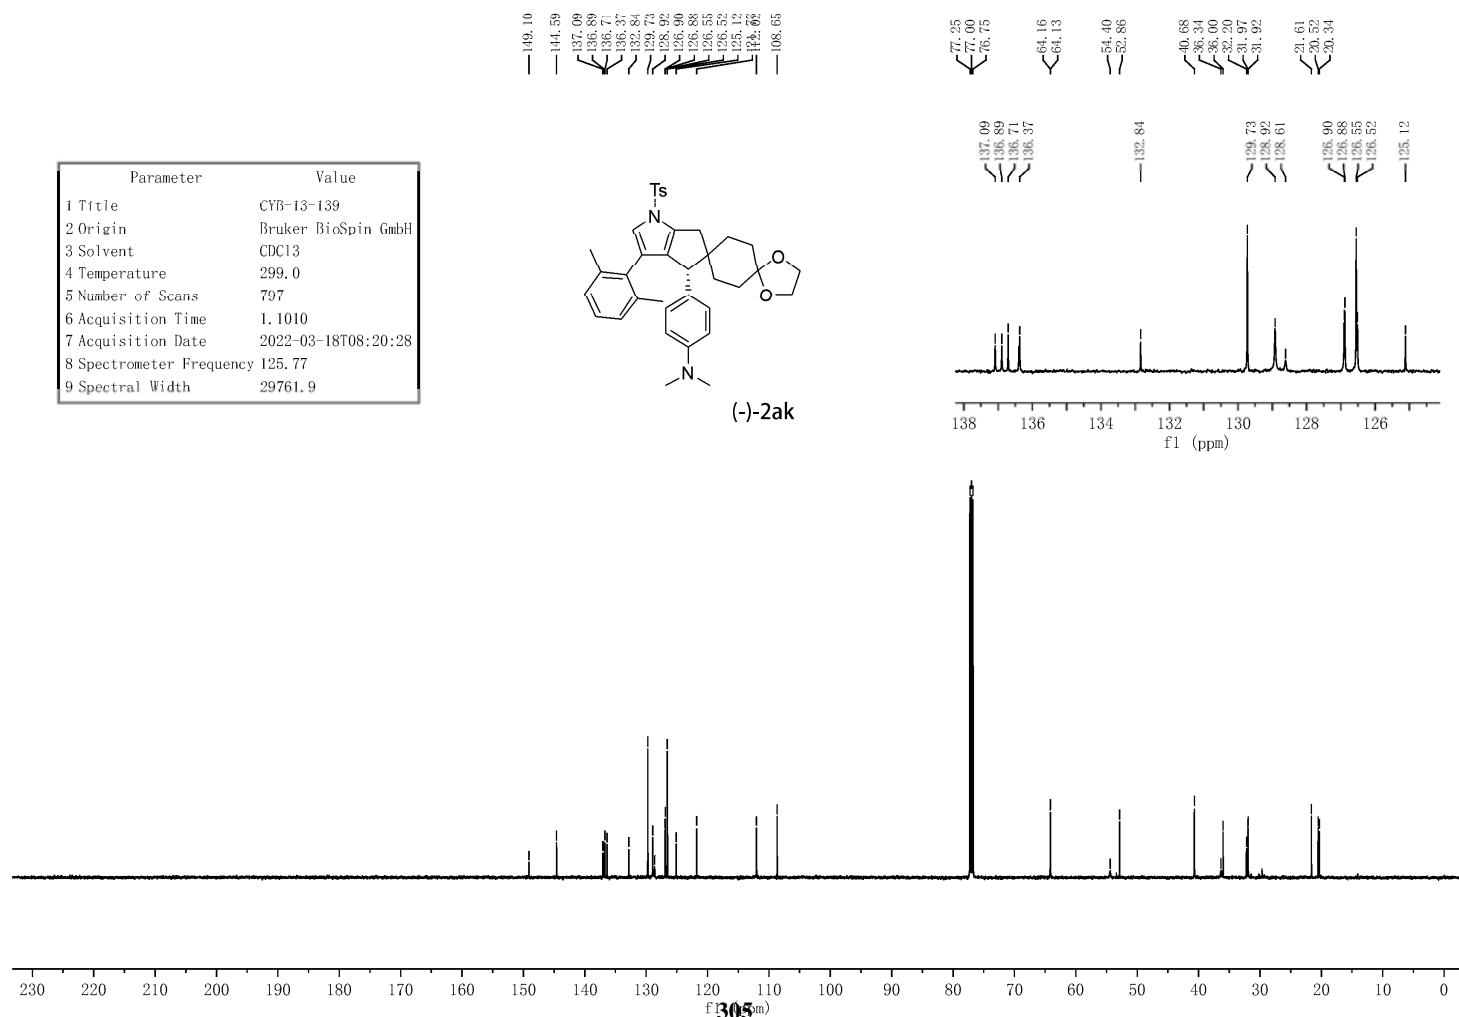

Supplementary Figure 205. <sup>1</sup>H and <sup>13</sup>C NMR spectra for (-)-2ak

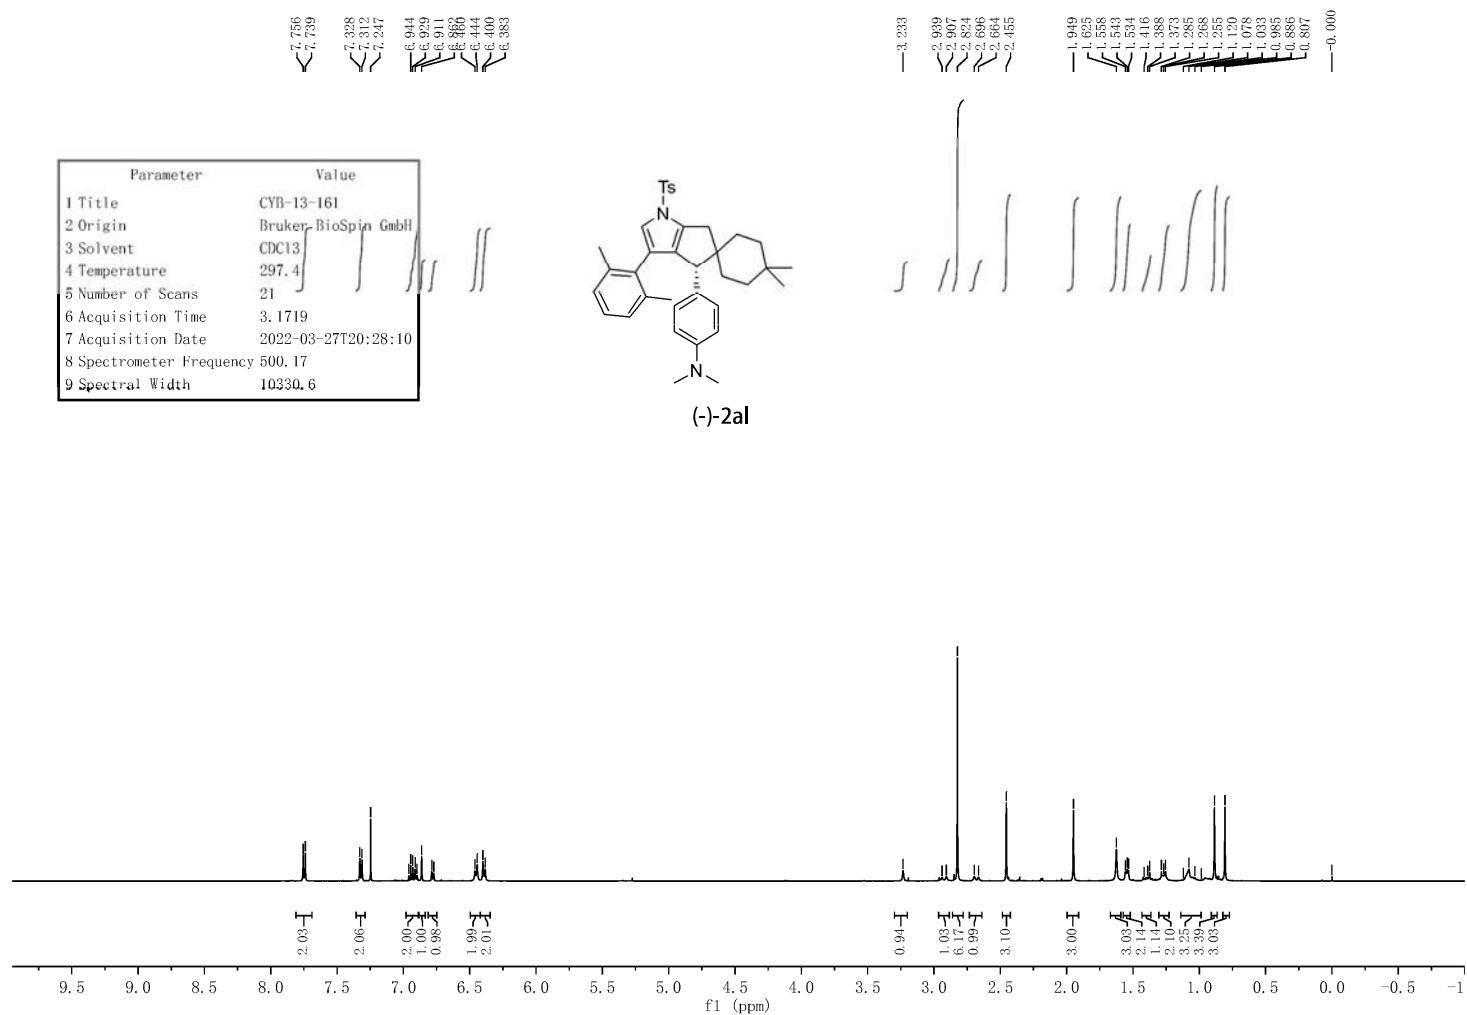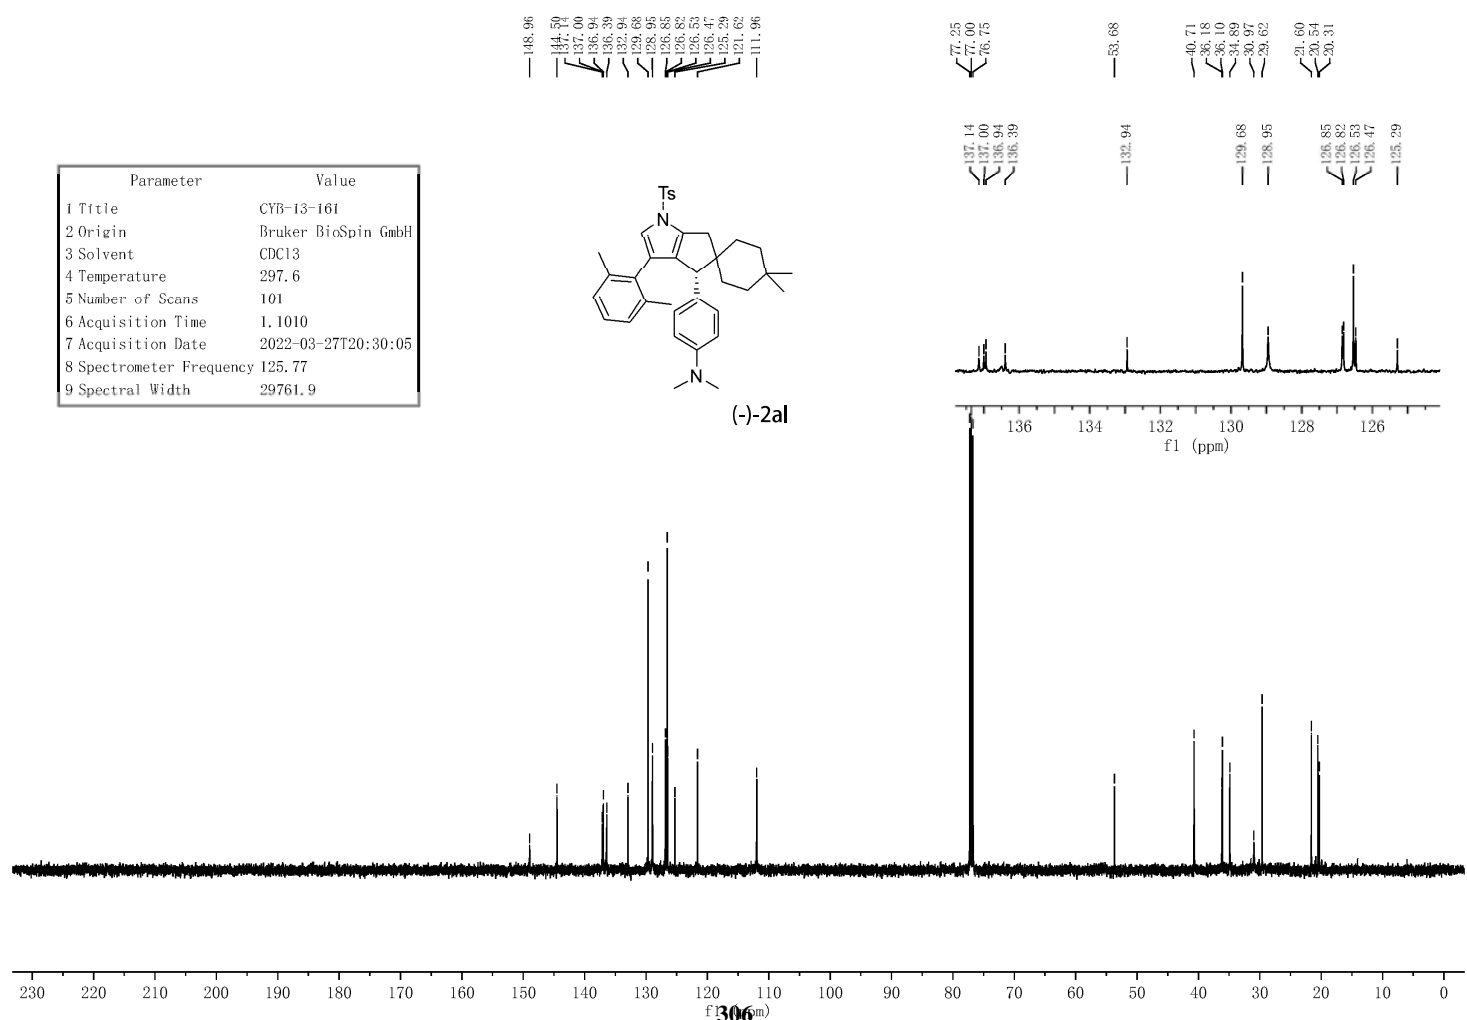

Supplementary Figure 206.  $^1\text{H}$  and  $^{13}\text{C}$  NMR spectra for (-)-2al

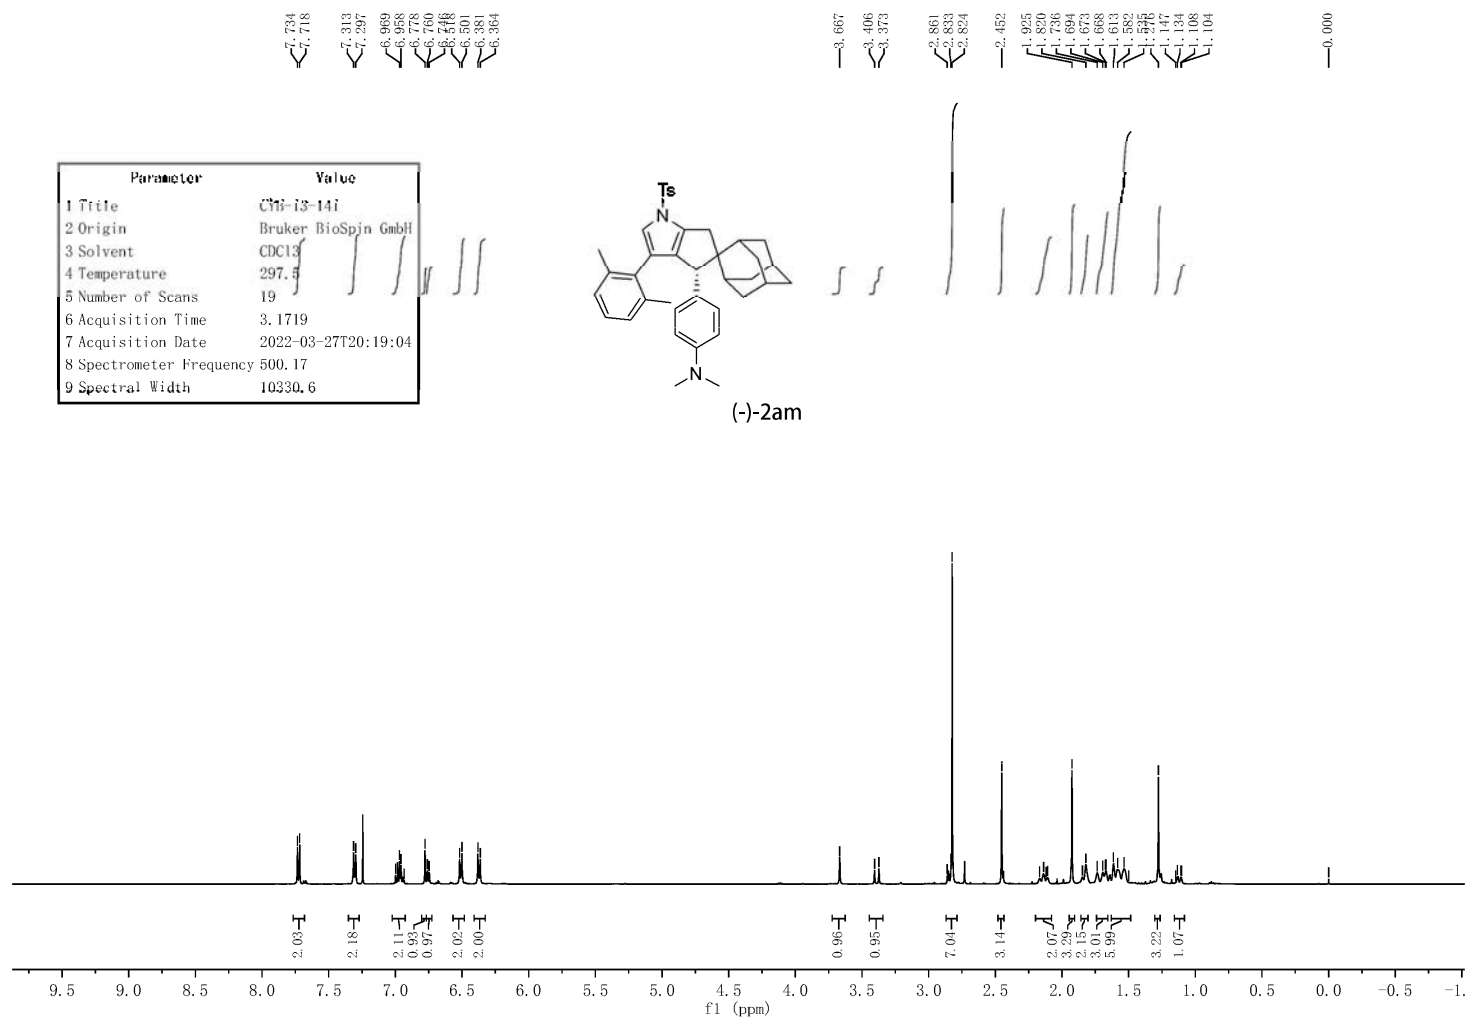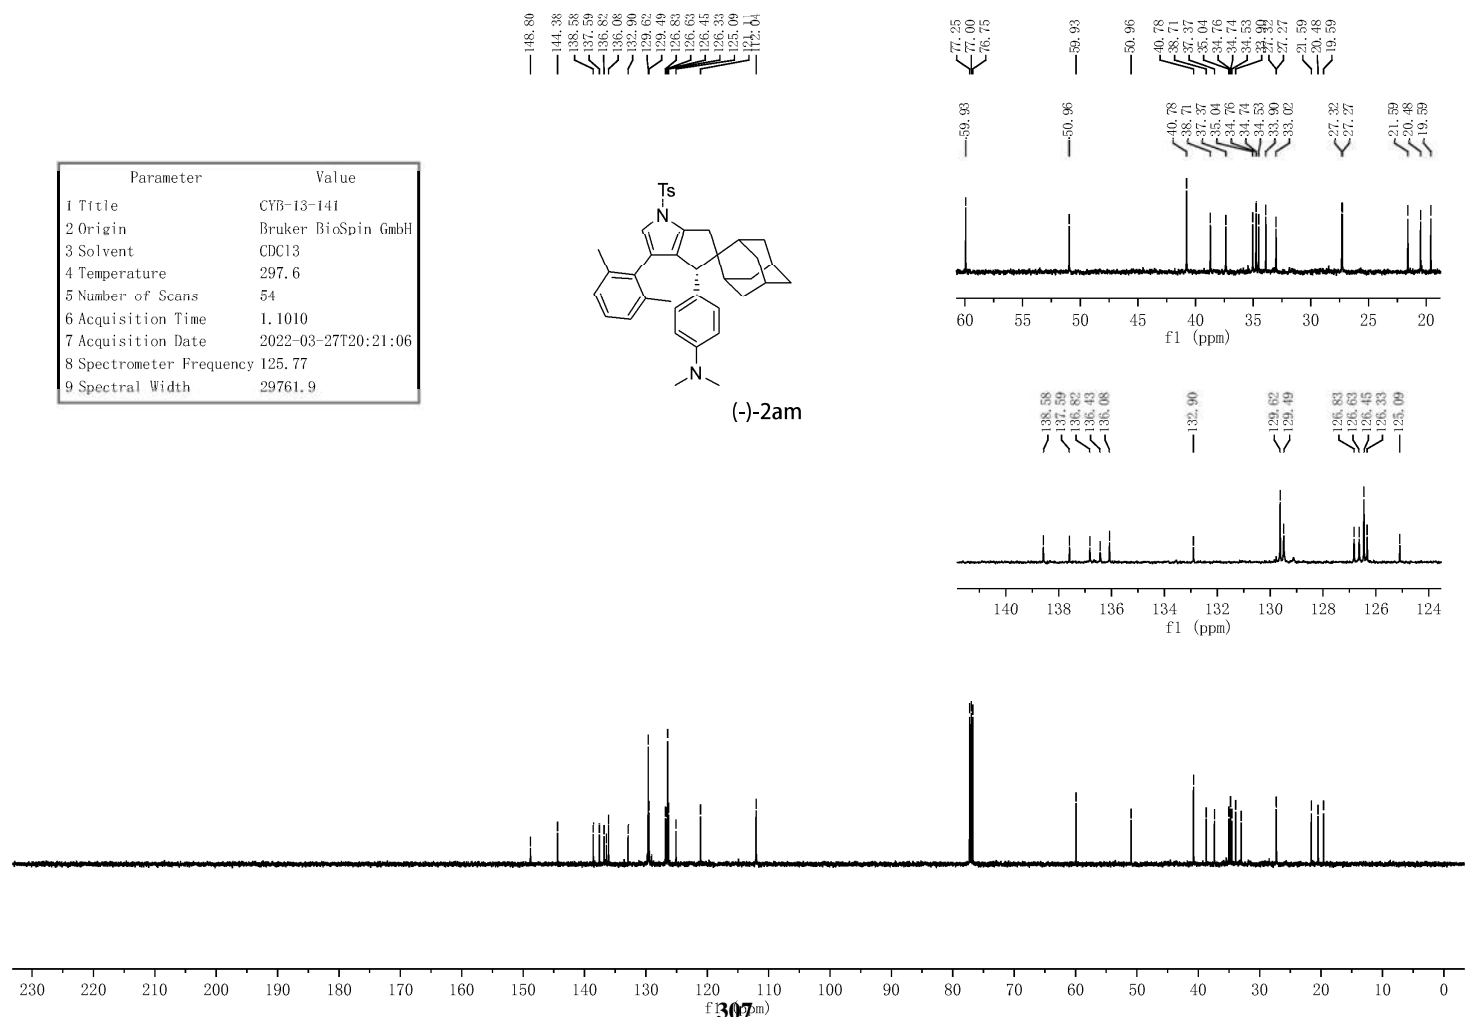

Supplementary Figure 207.  $^1\text{H}$  and  $^{13}\text{C}$  NMR spectra for (-)-2am

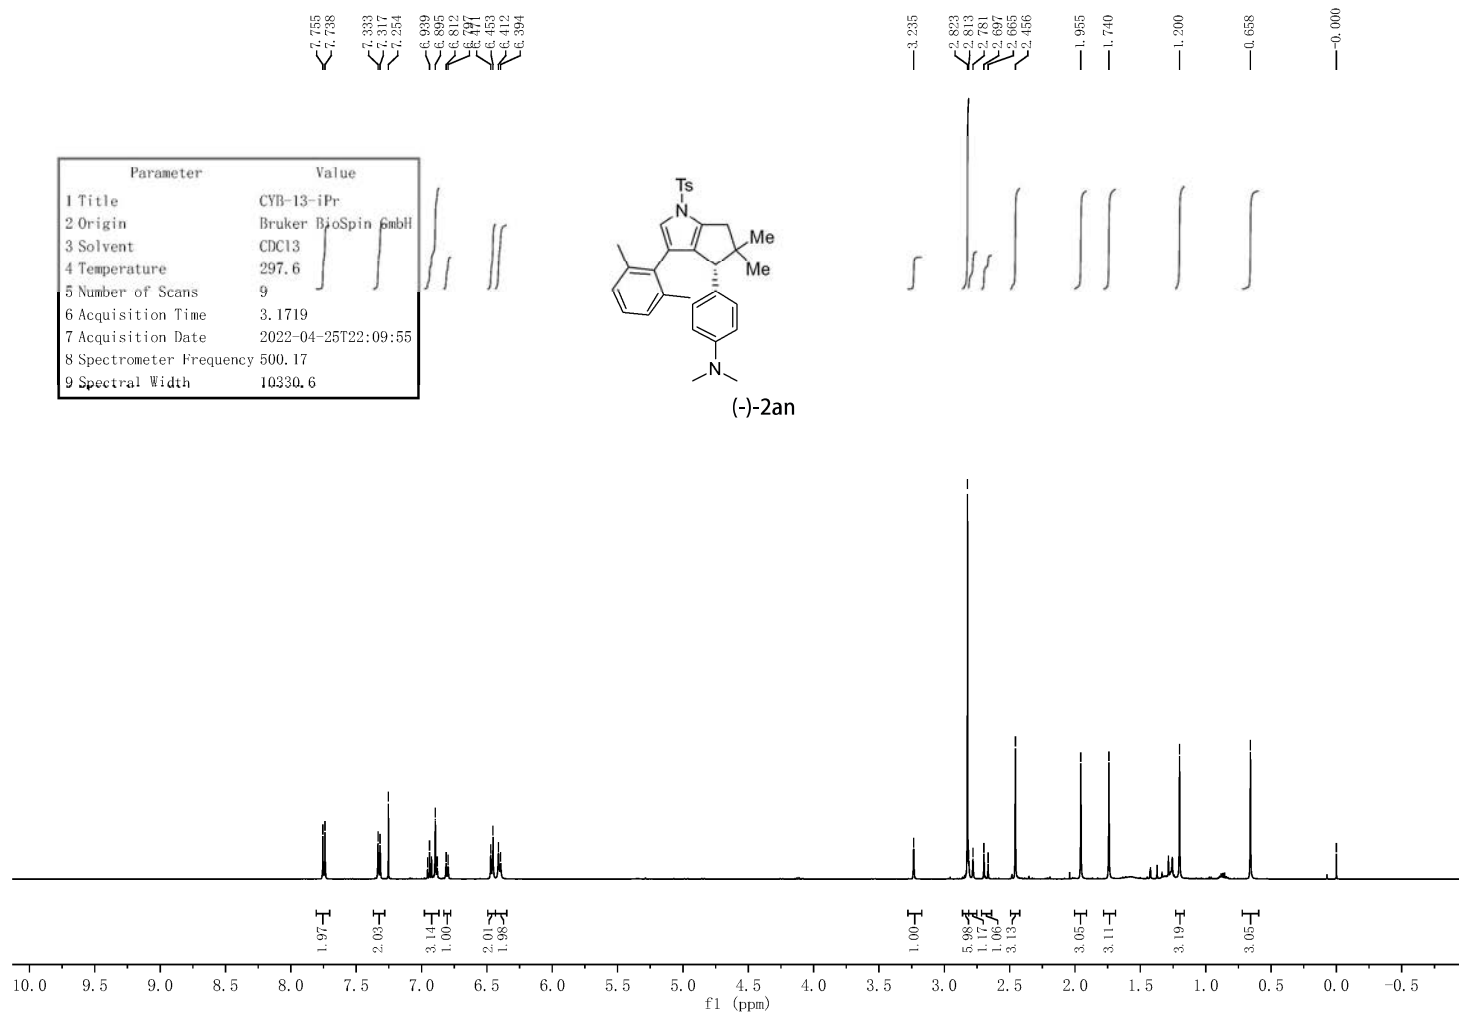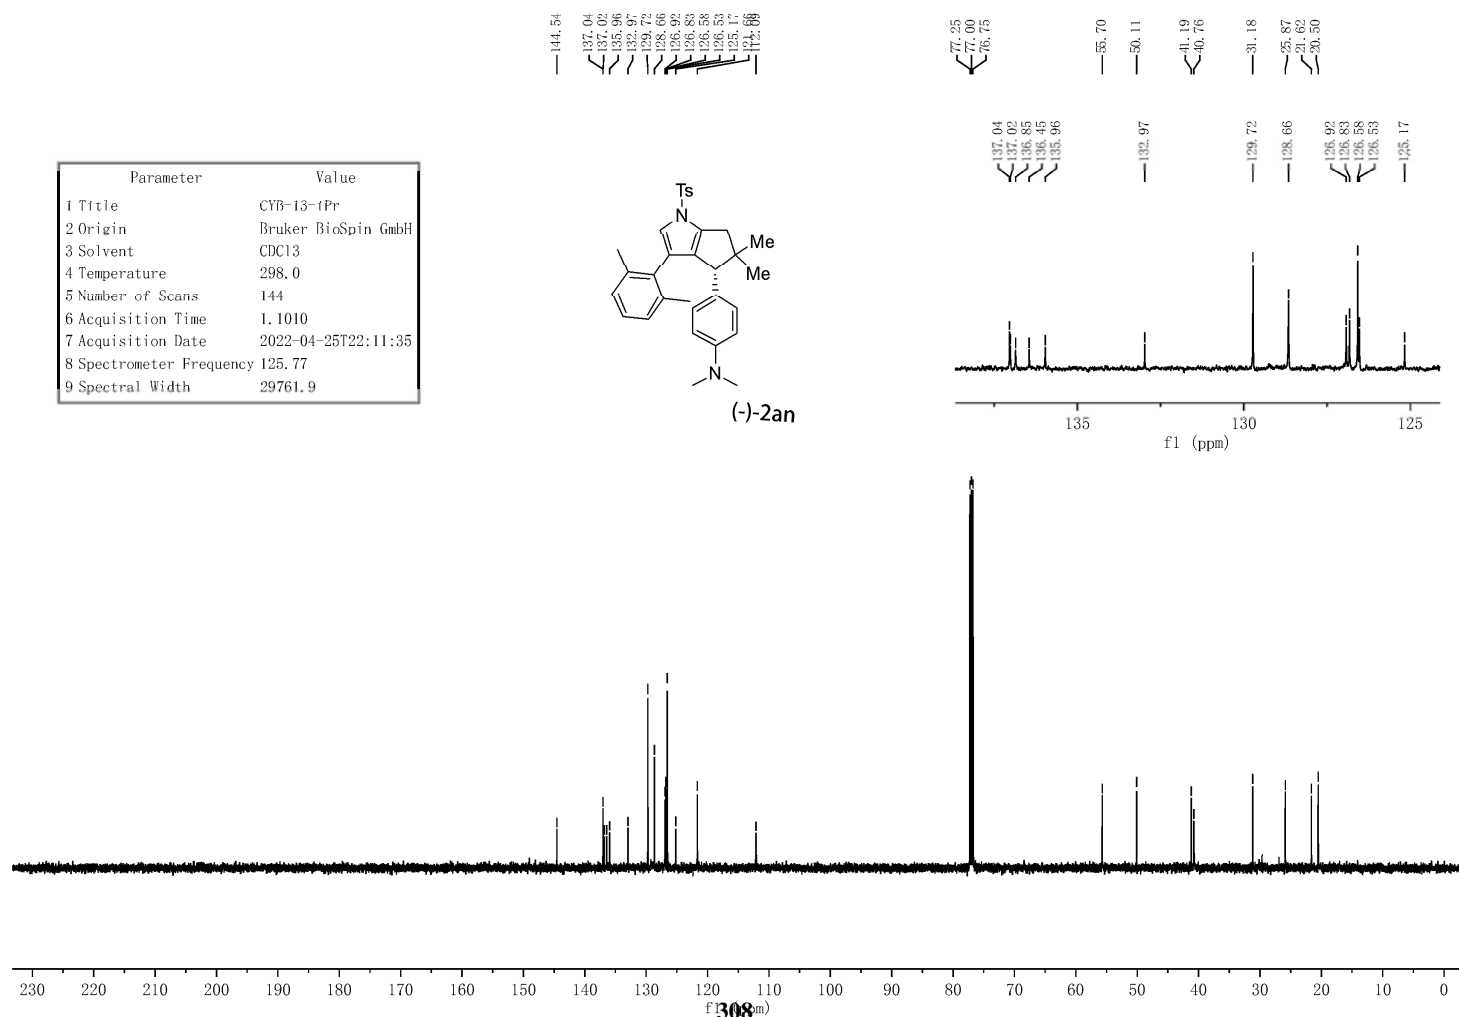

Supplementary Figure 208.  $^1\text{H}$  and  $^{13}\text{C}$  NMR spectra for (-)-2an

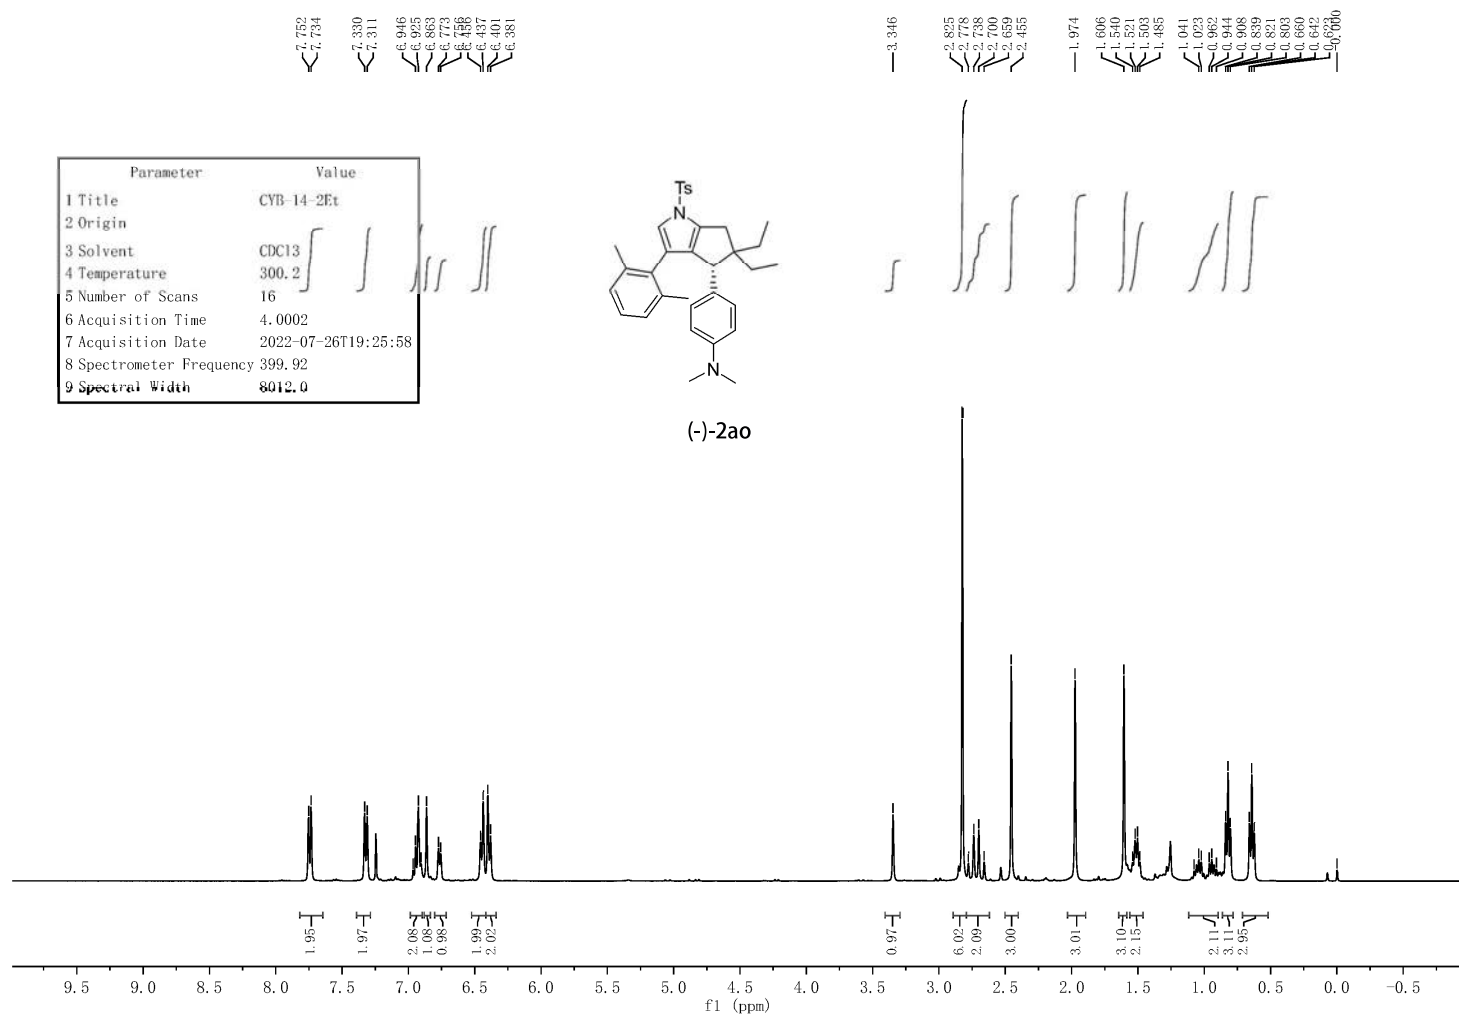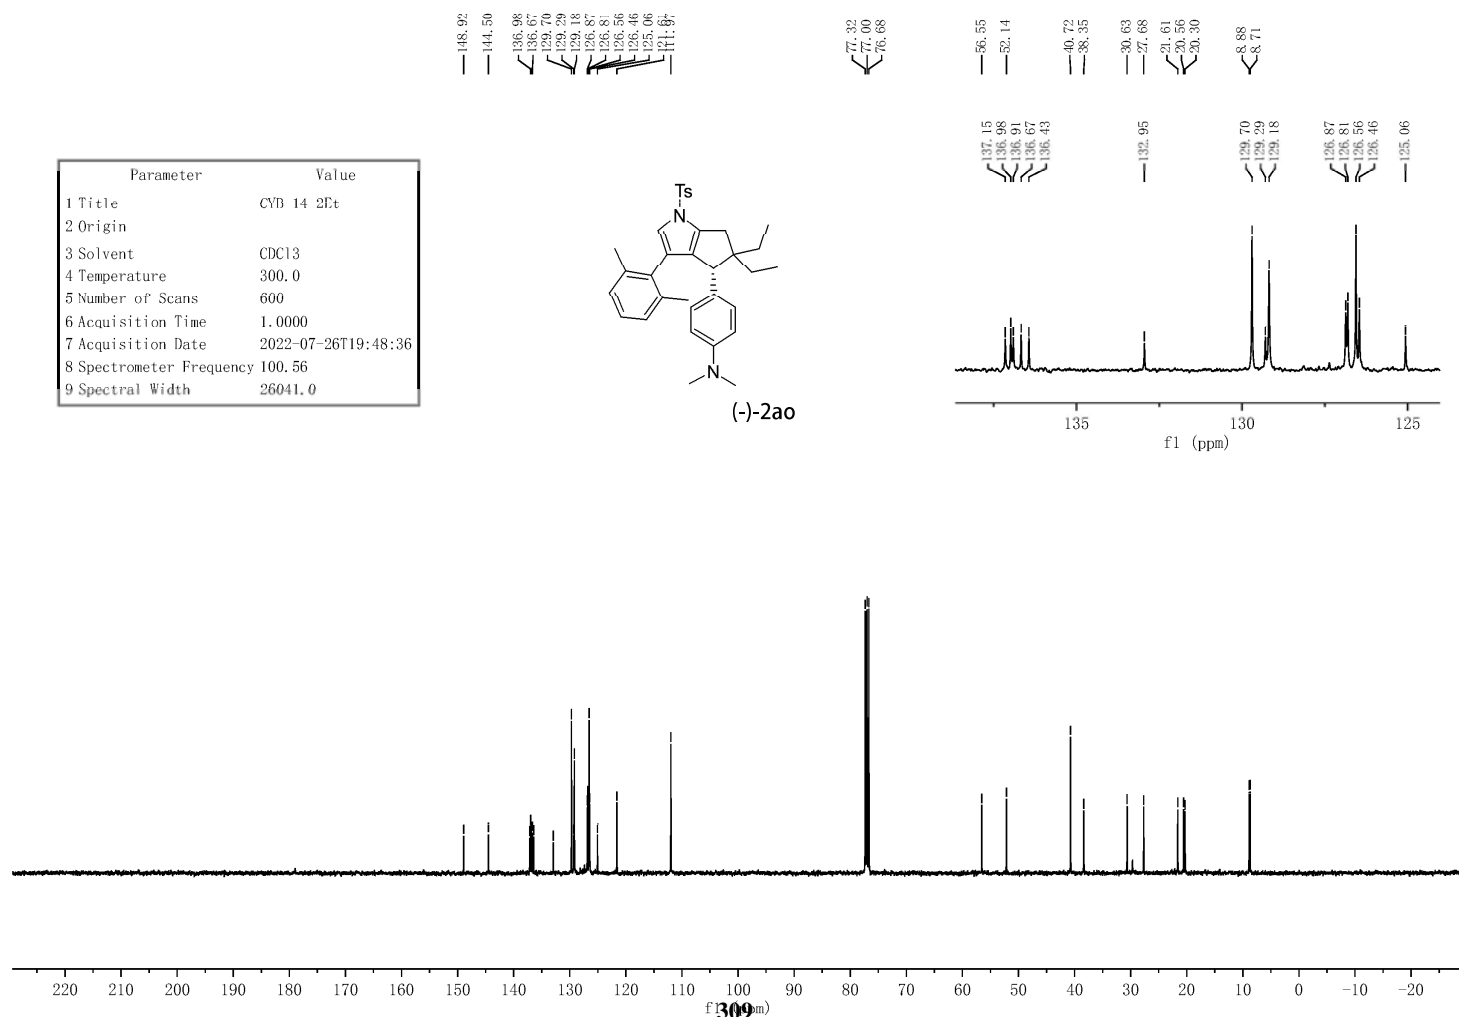

Supplementary Figure 209. <sup>1</sup>H and <sup>13</sup>C NMR spectra for (-)-2ao

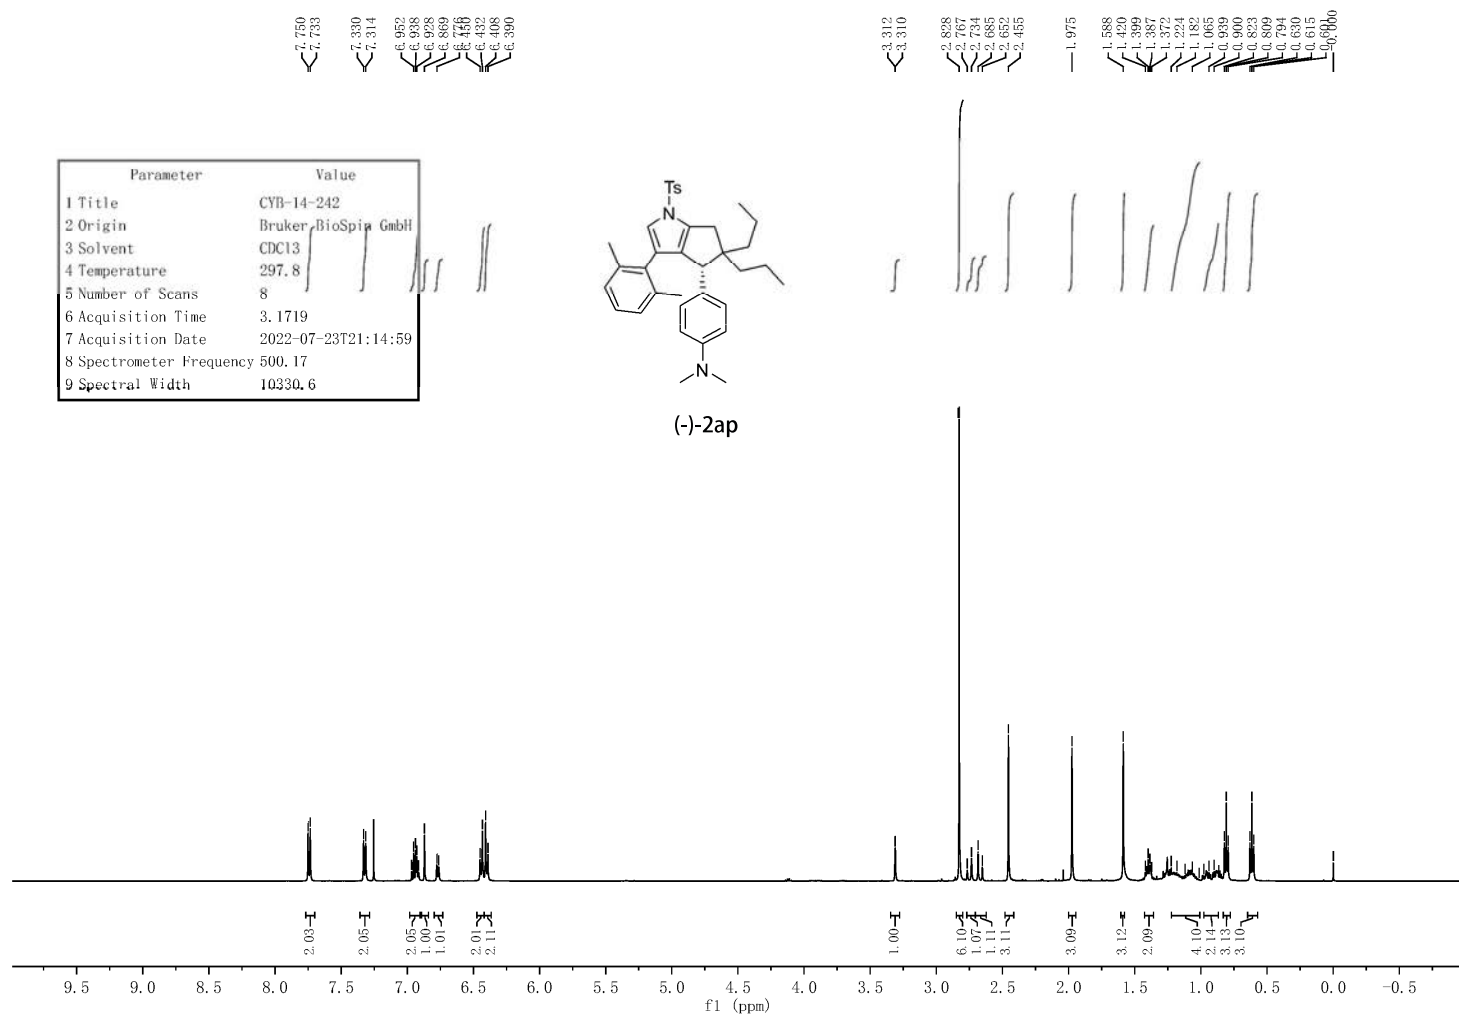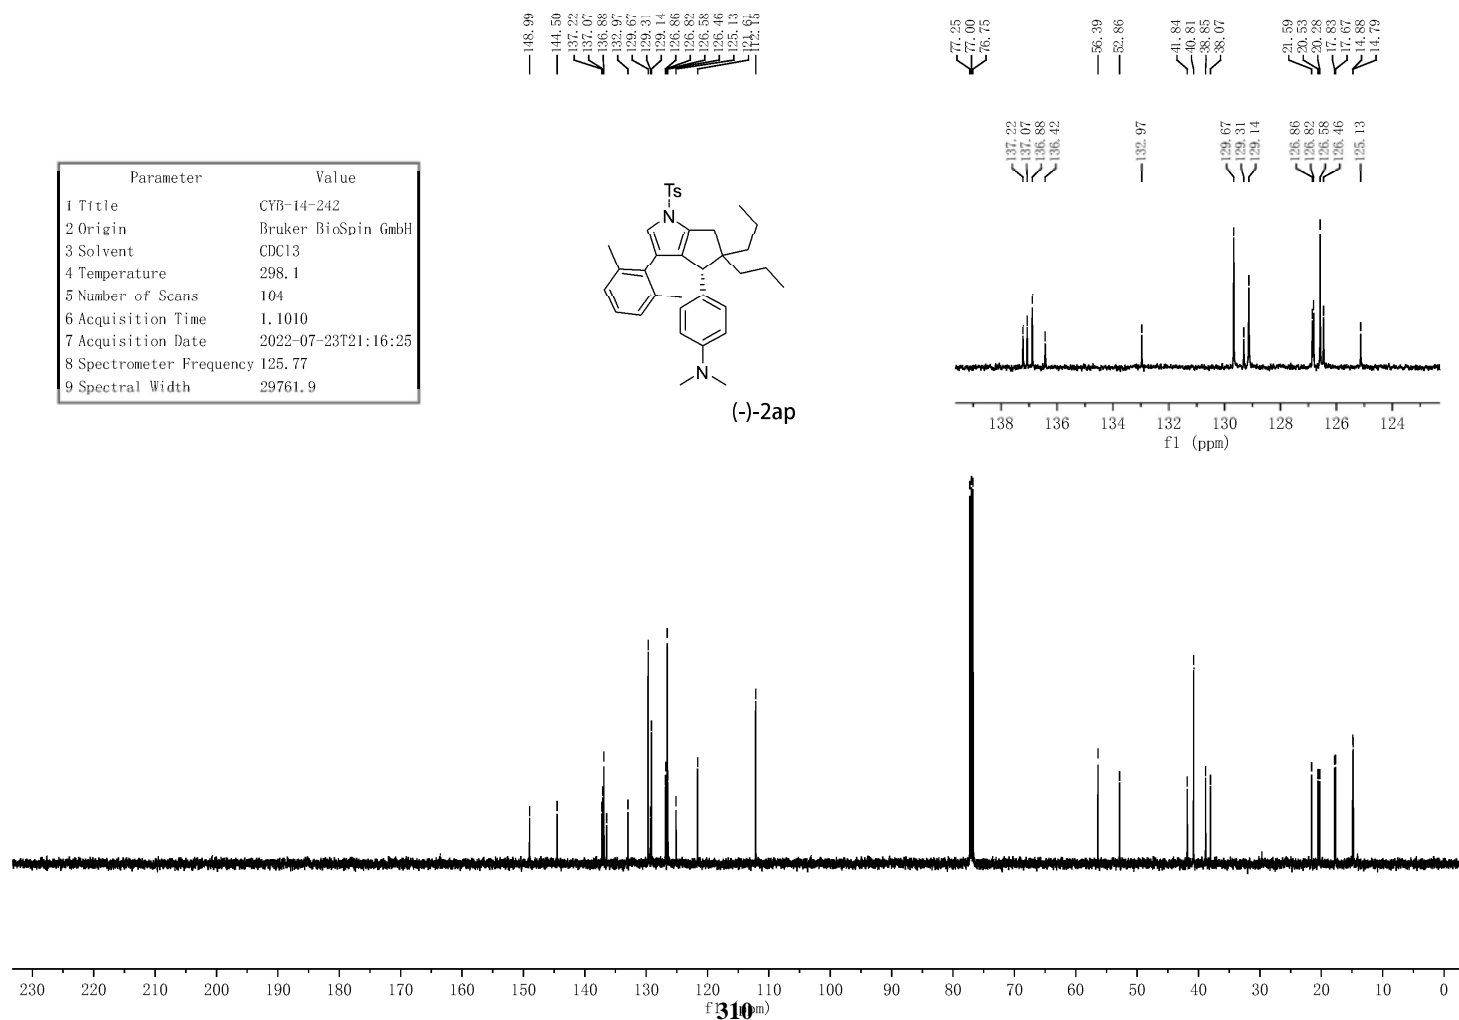

Supplementary Figure 210.  $^1\text{H}$  and  $^{13}\text{C}$  NMR spectra for (-)-2ap

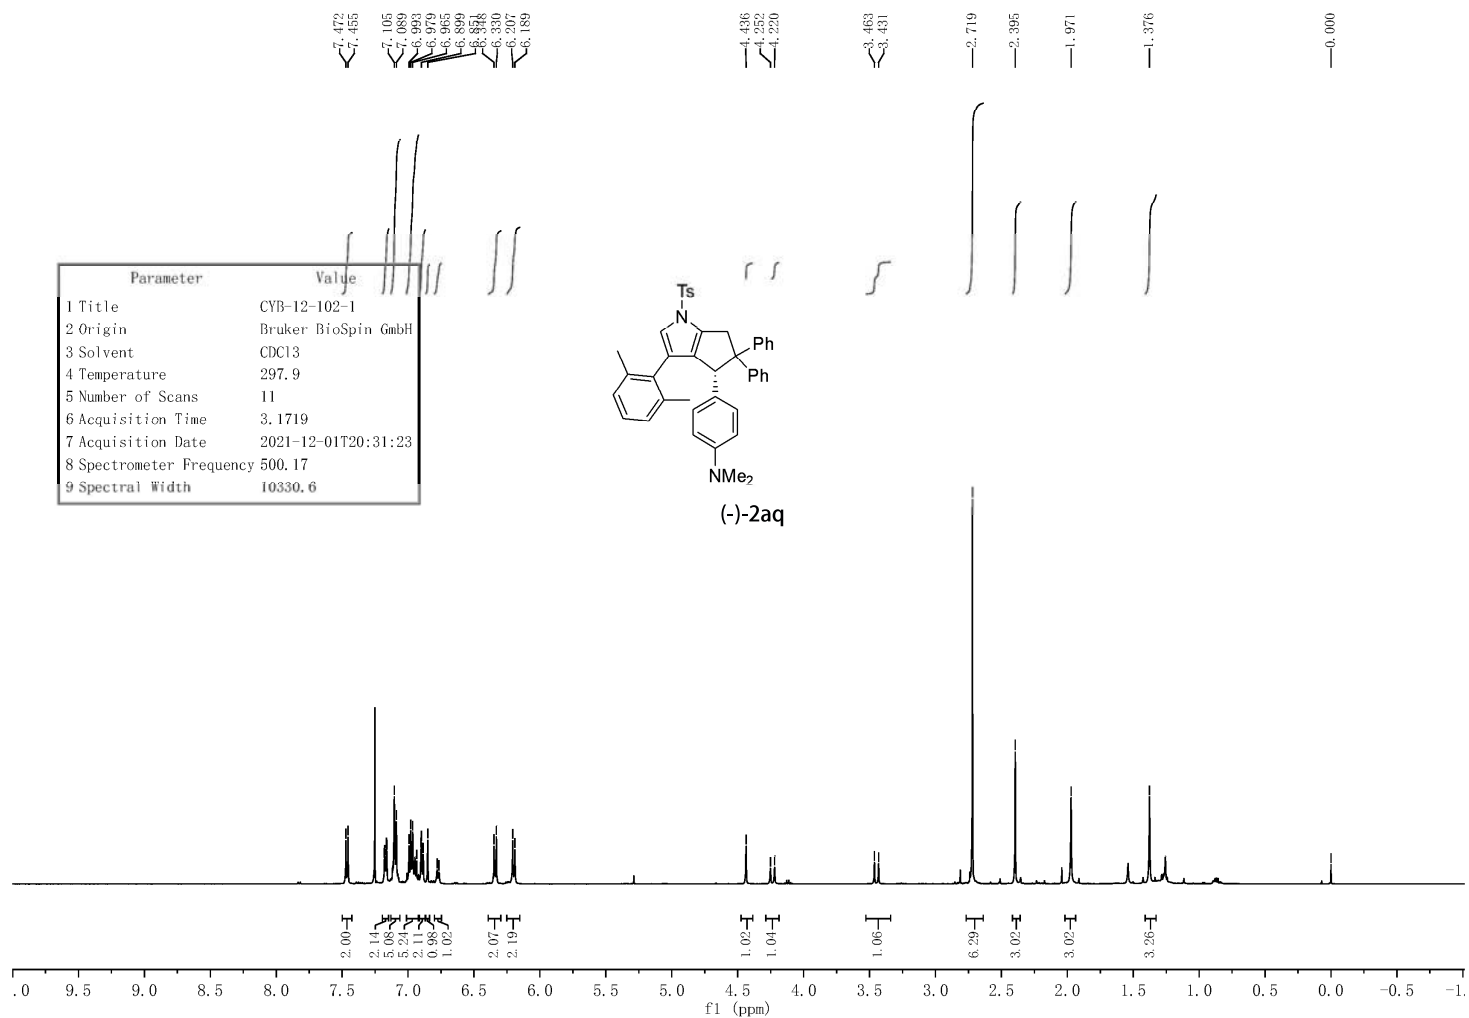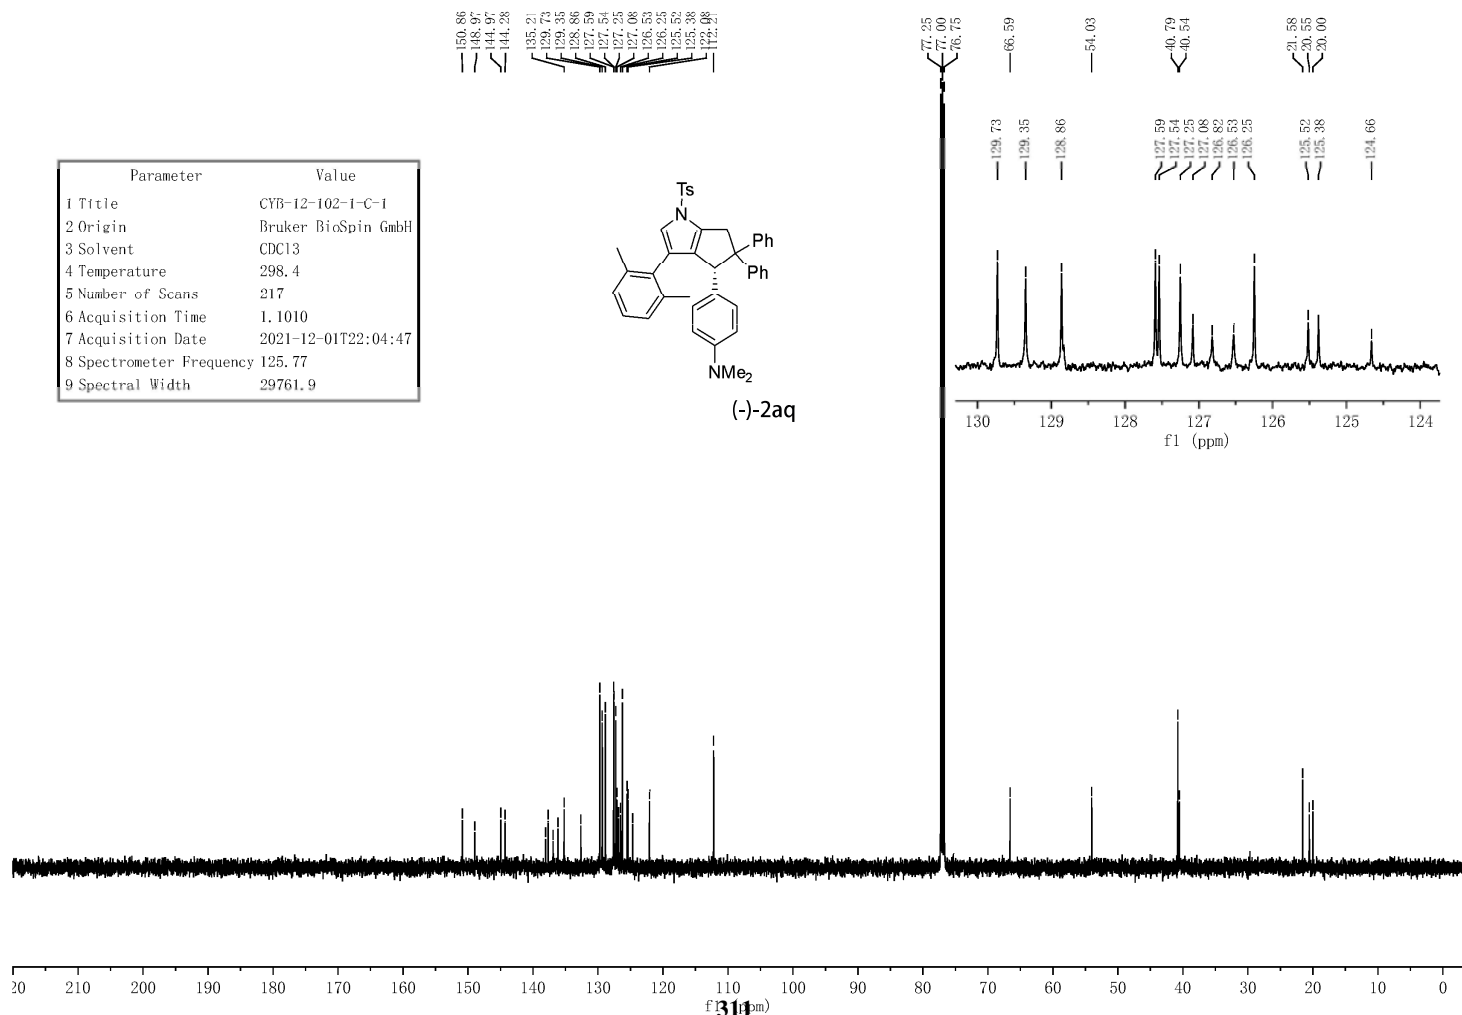

Supplementary Figure 21. <sup>1</sup>H and <sup>13</sup>C NMR spectra for (-)-2aq

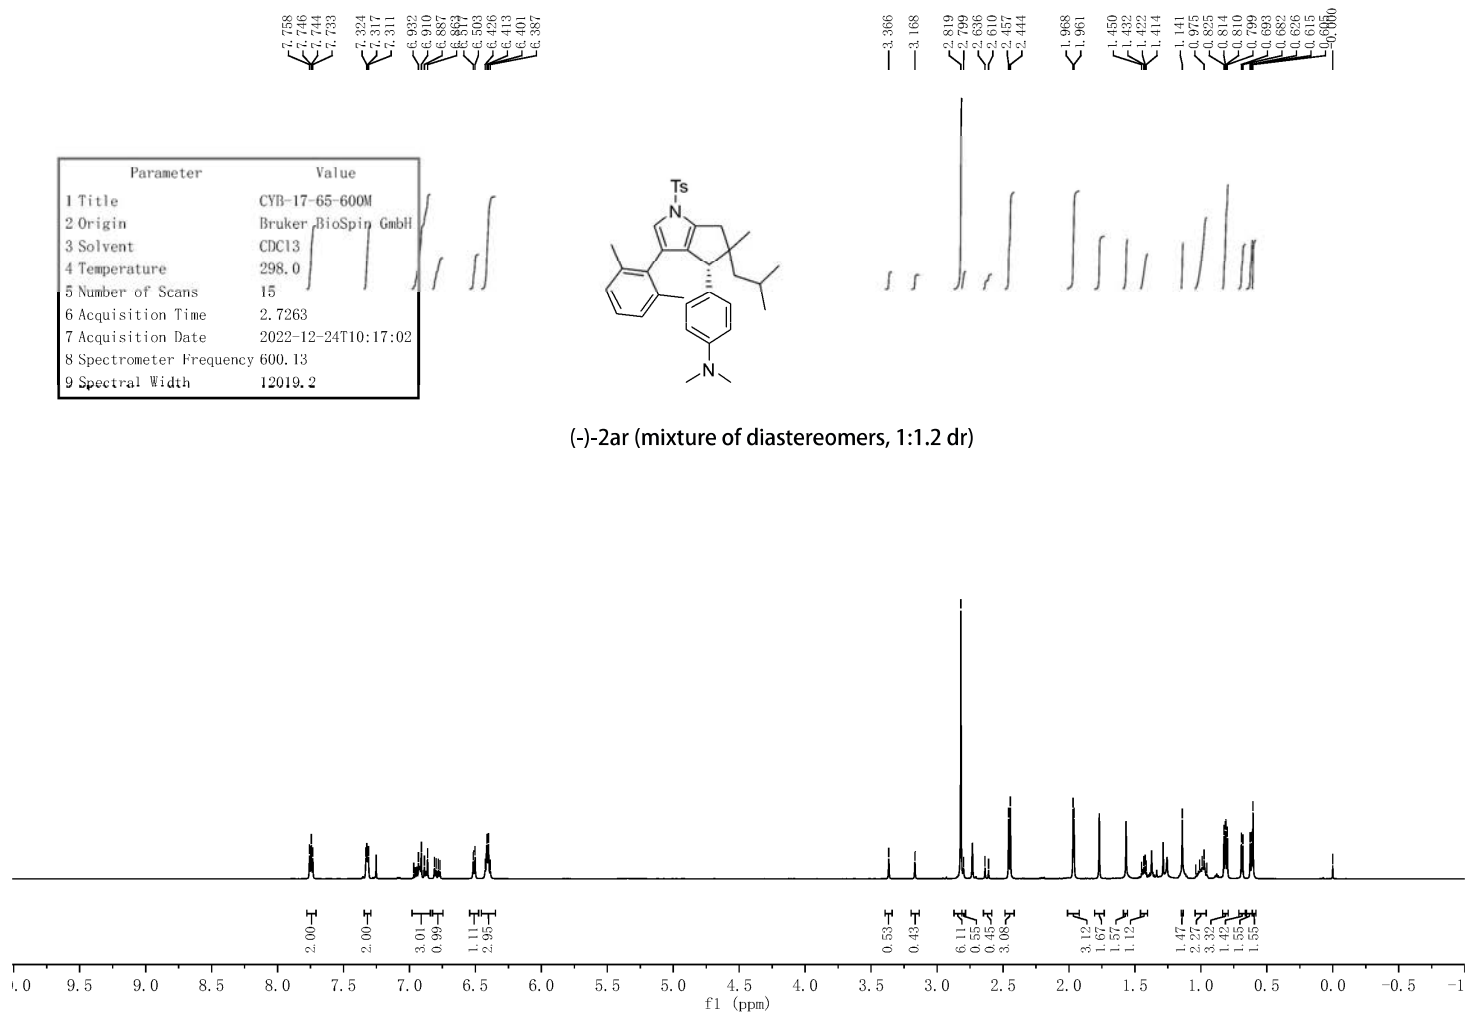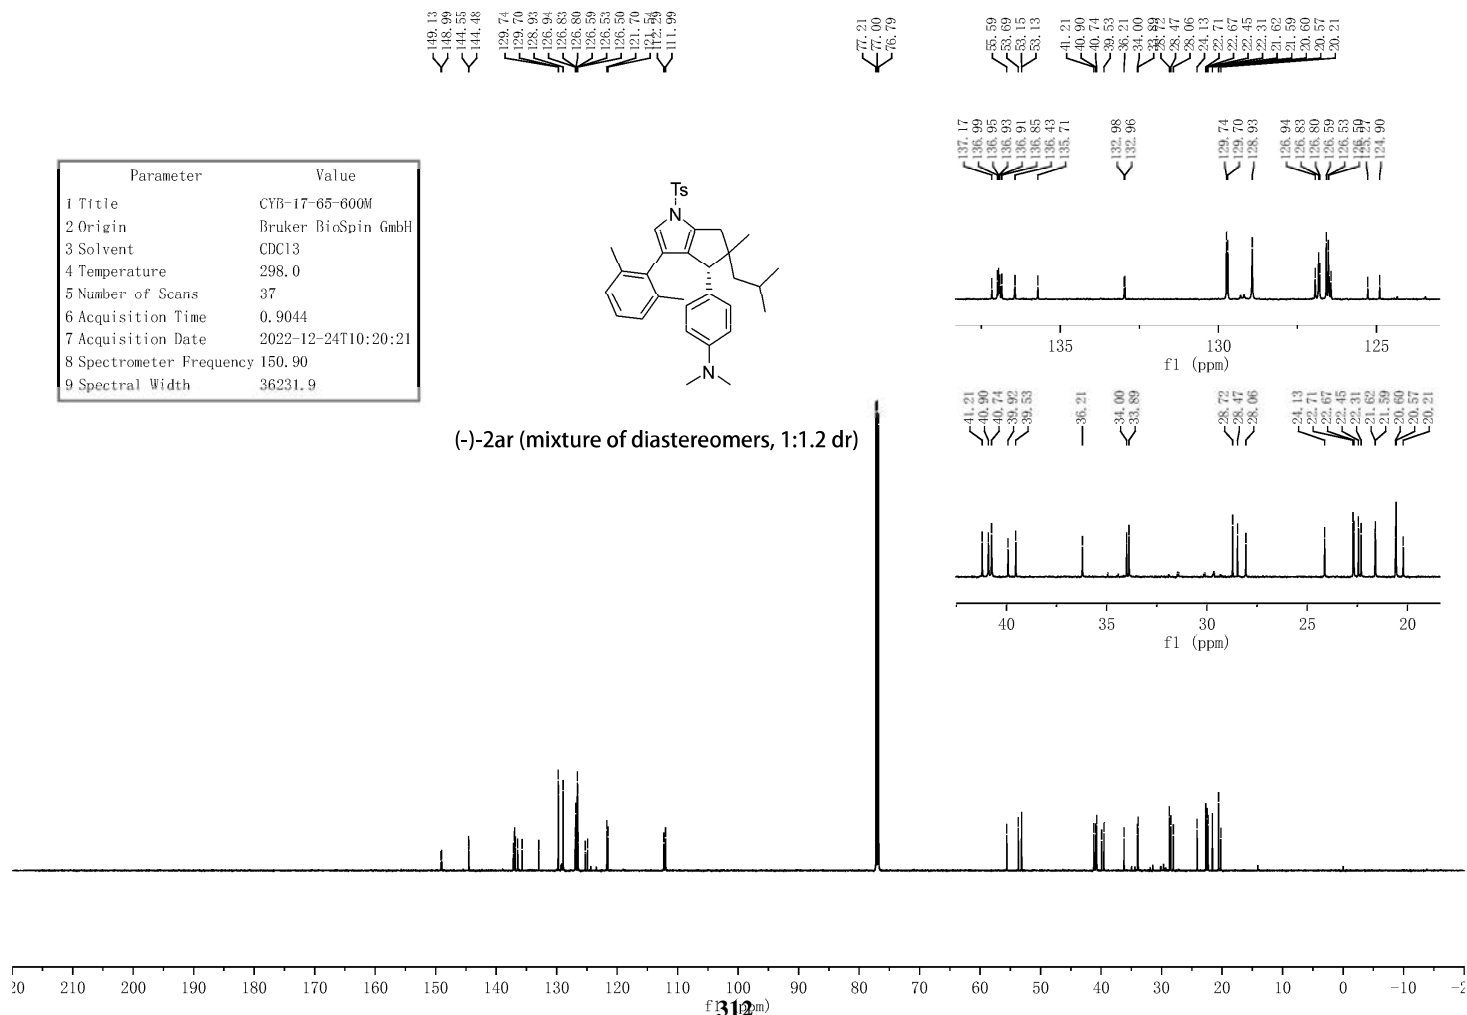

Supplementary Figure 212. <sup>1</sup>H and <sup>13</sup>C NMR spectra for (-)-2ar



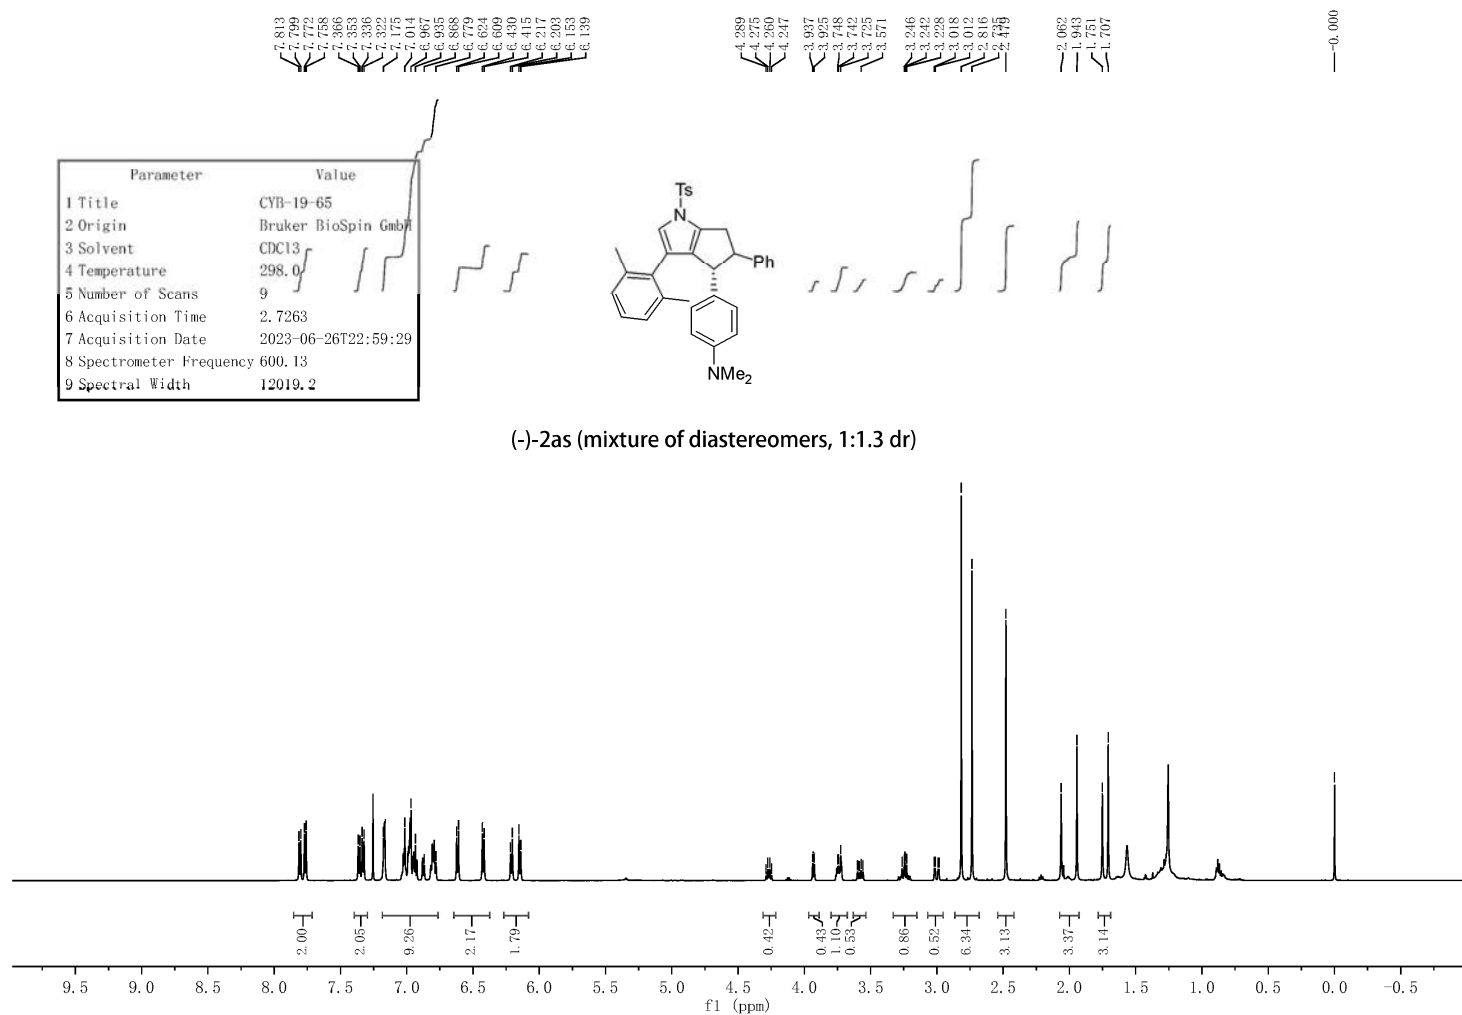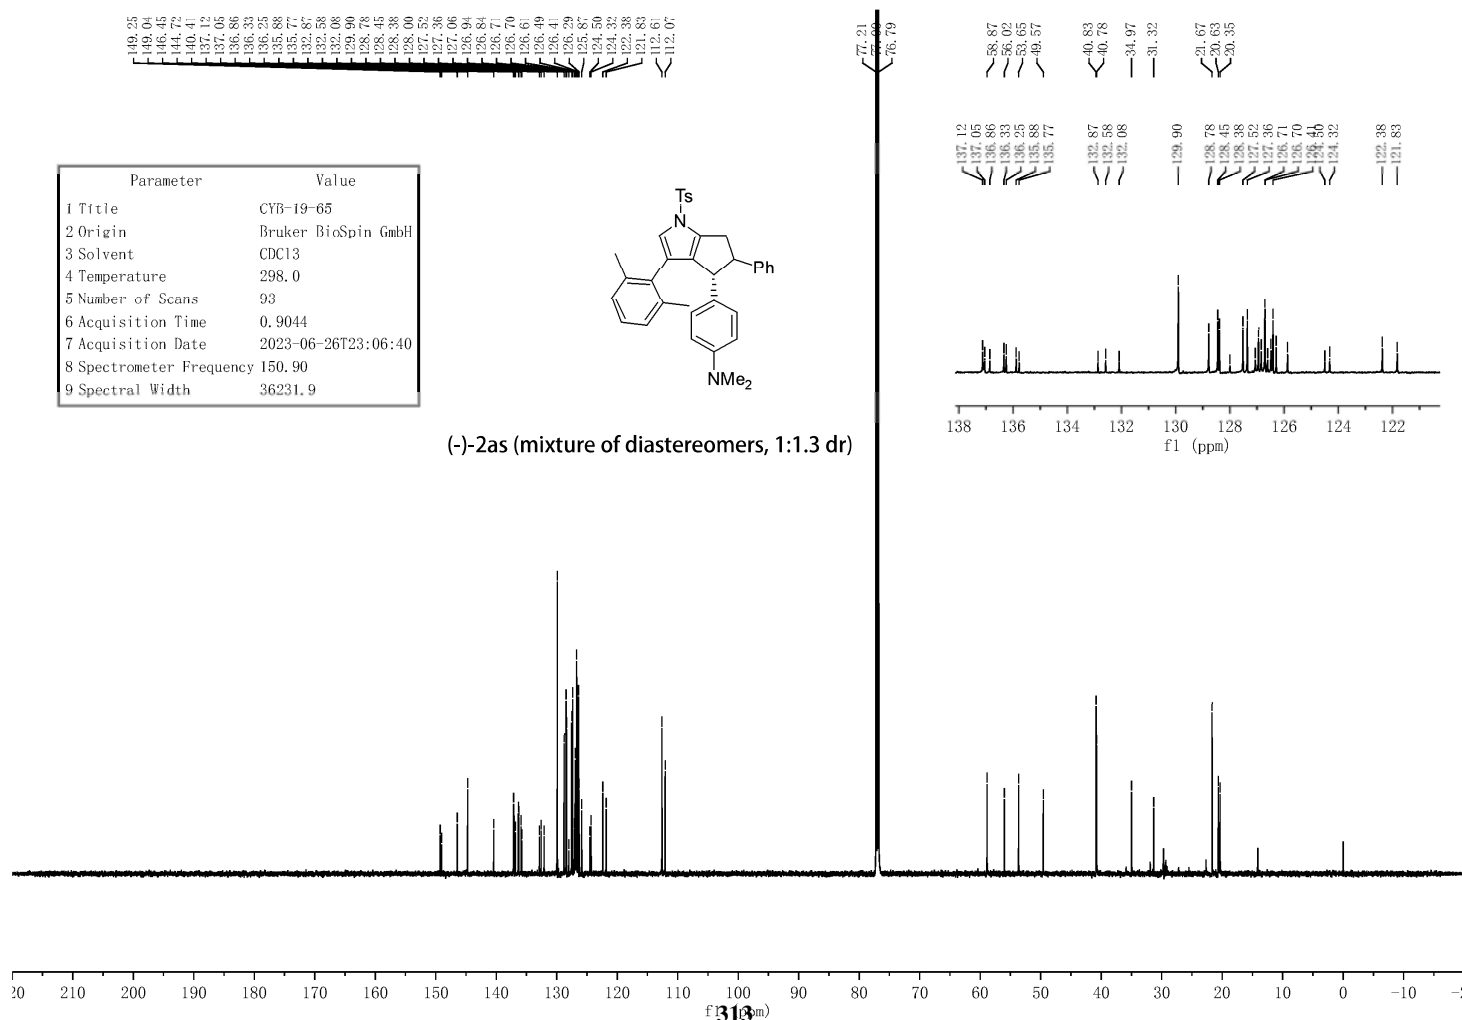

Supplementary Figure 213. <sup>1</sup>H and <sup>13</sup>C NMR spectra for (-)-2as

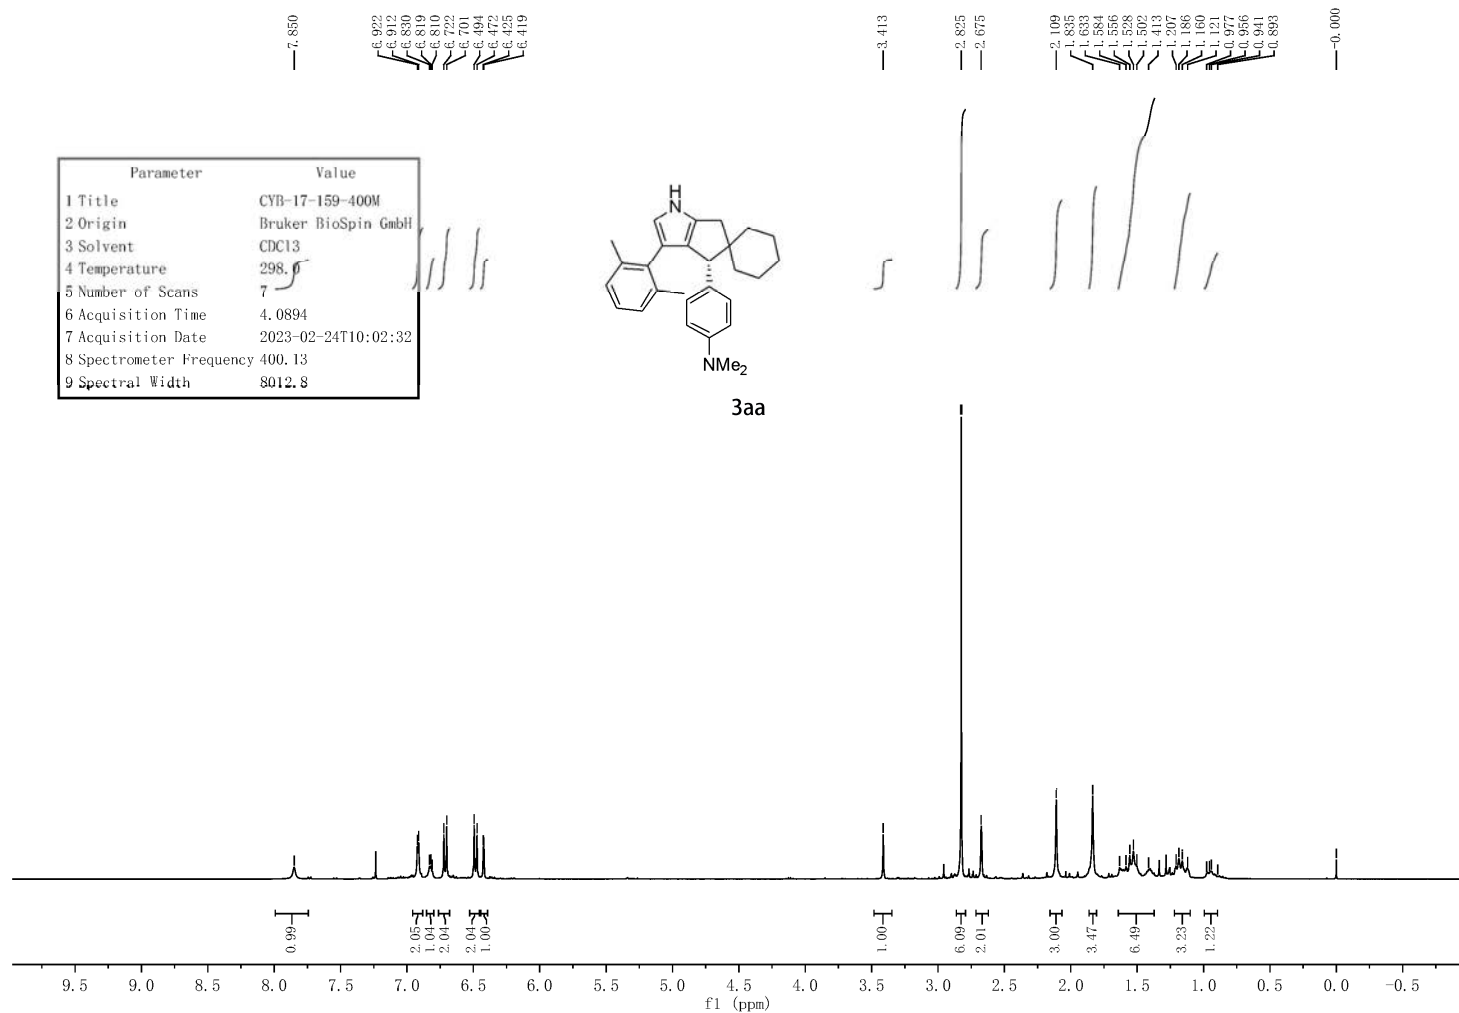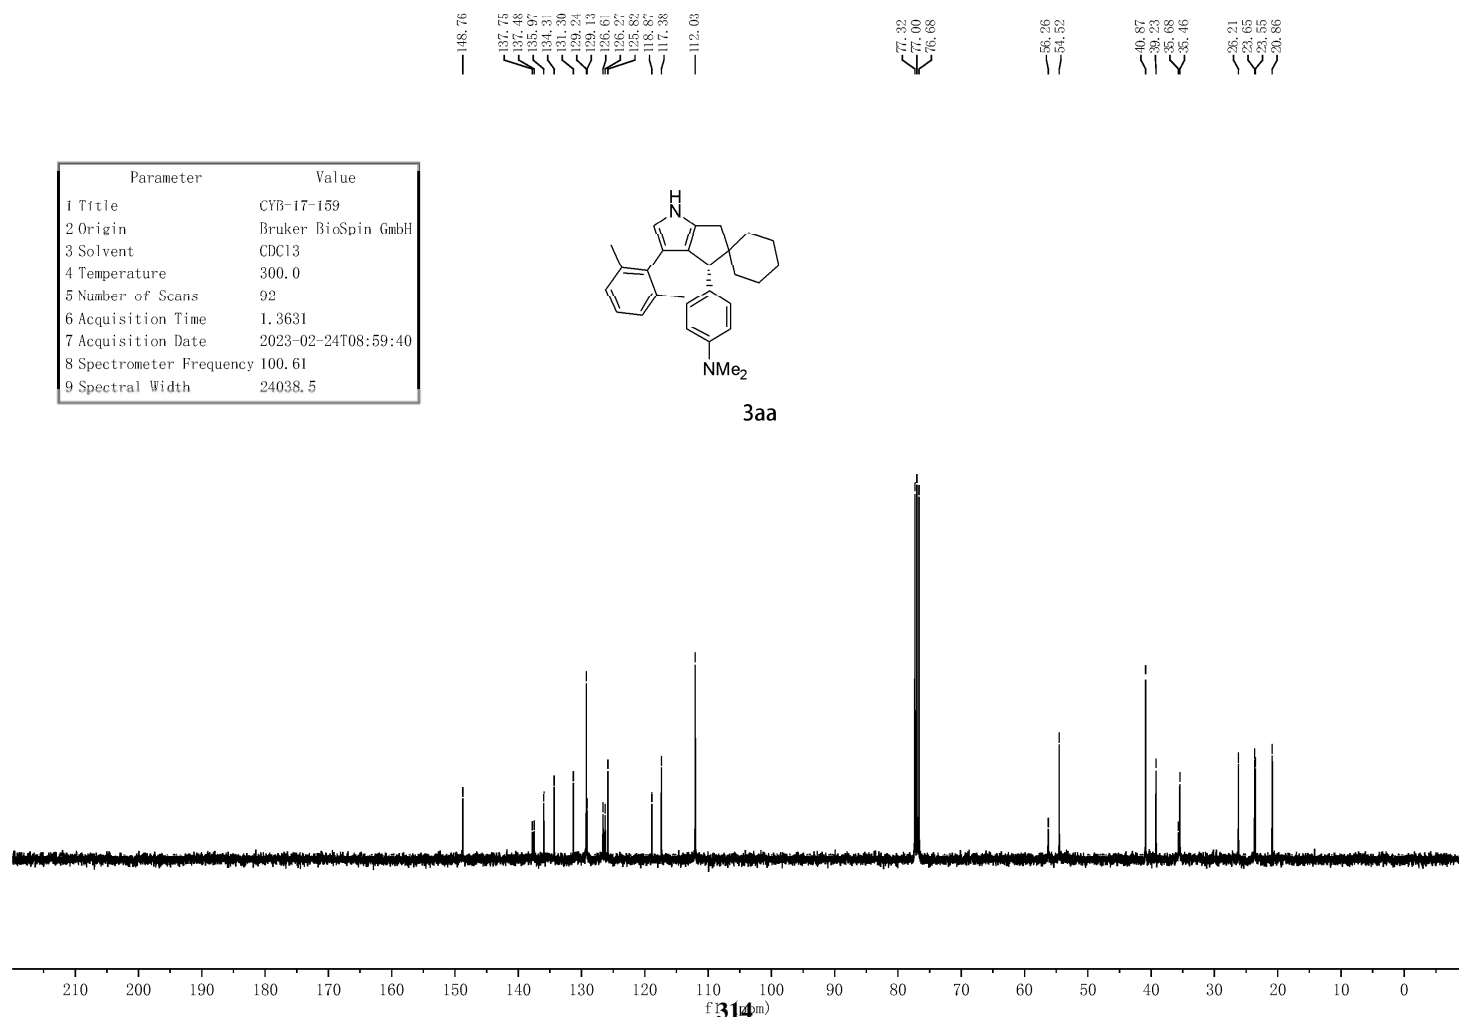

Supplementary Figure 214. <sup>1</sup>H and <sup>13</sup>C NMR spectra for 3aa

129.24  
126.60  
126.27  
125.82  
117.38  
112.03  
56.26  
40.87  
39.22  
33.09  
31.46  
26.20  
23.64  
23.55  
20.87

| Parameter                | Value               |
|--------------------------|---------------------|
| 1 Title                  | CYB-17-159          |
| 2 Origin                 | Bruker BioSpin GmbH |
| 3 Solvent                | CDCl3               |
| 4 Temperature            | 300.0               |
| 5 Number of Scans        | 106                 |
| 6 Acquisition Time       | 1.3631              |
| 7 Acquisition Date       | 2023-02-24T09:11:45 |
| 8 Spectrometer Frequency | 100.61              |
| 9 Spectral Width         | 24038.5             |

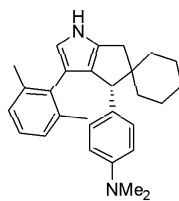

3aa

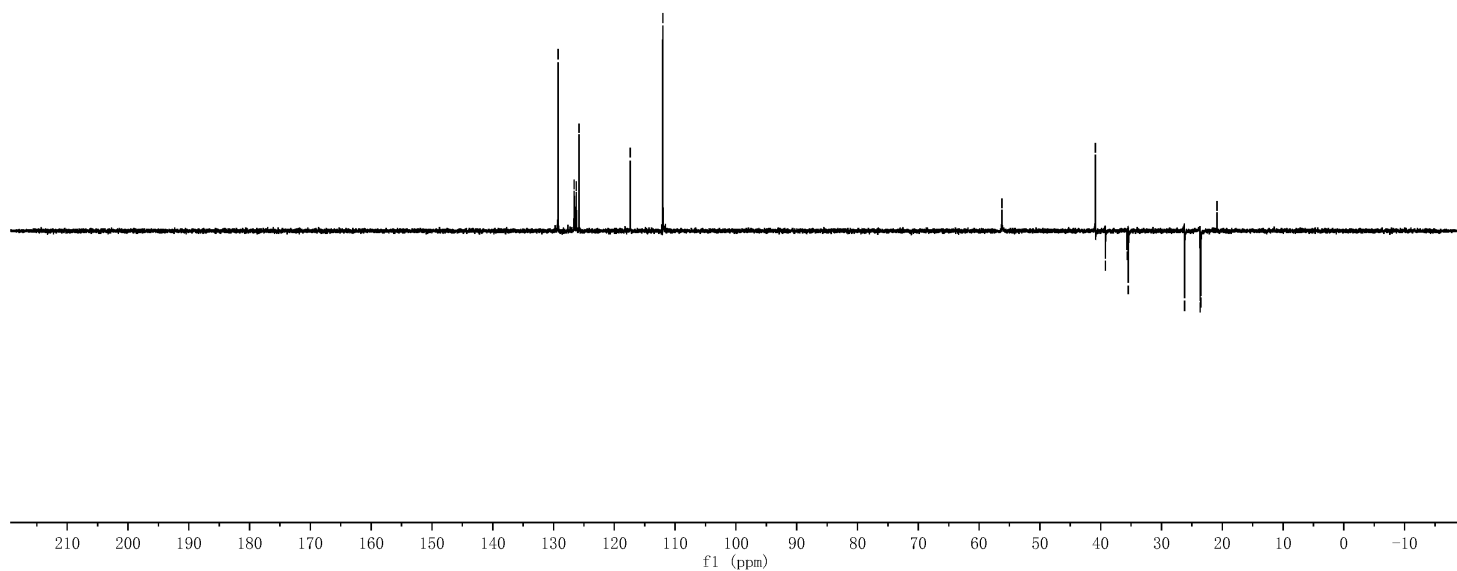

Supplementary Figure 215. DEPT-135 NMR spectra for 3aa

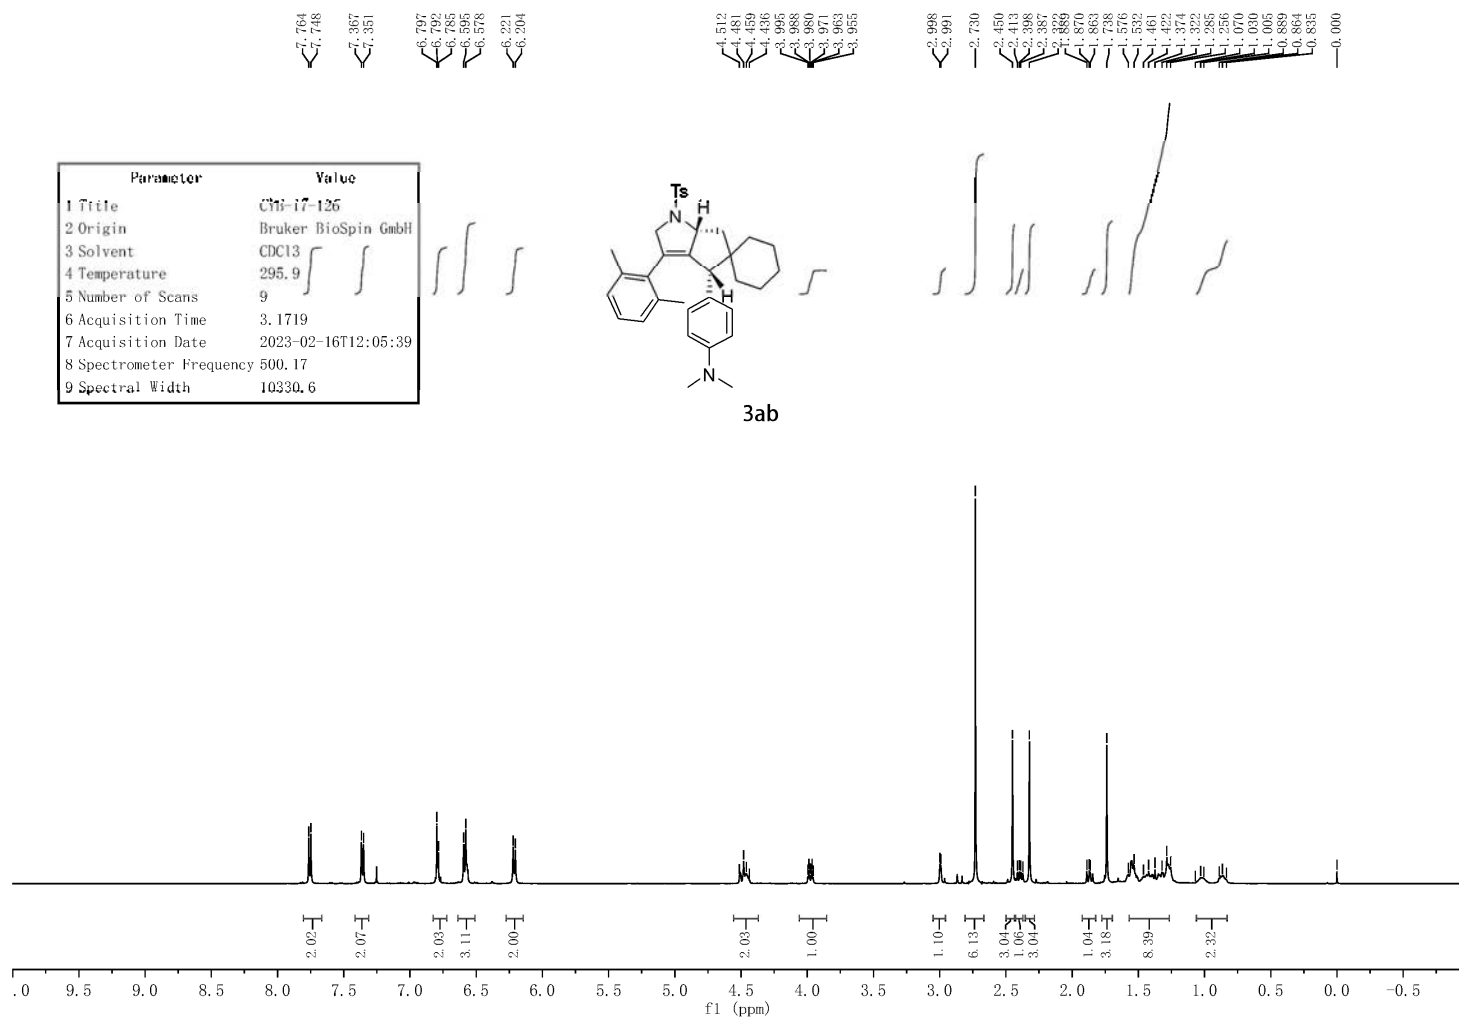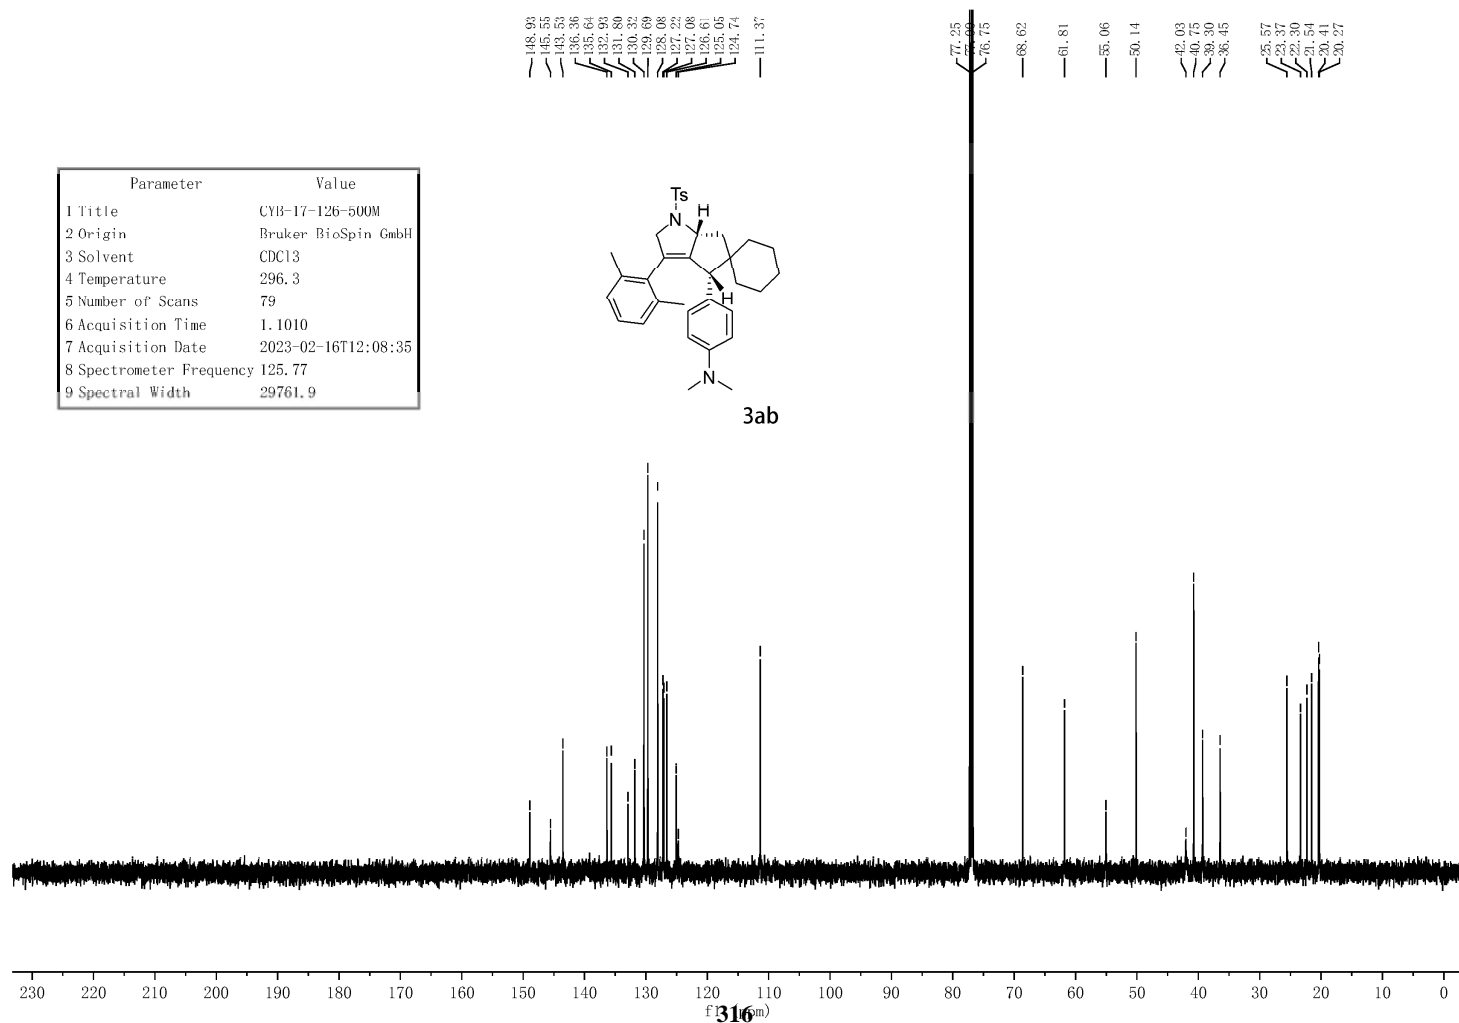

Supplementary Figure 216. <sup>1</sup>H and <sup>13</sup>C NMR spectra for 3ab

130.39  
129.76  
128.16  
127.29  
126.68  
111.44  
68.70  
61.88  
55.13  
42.09  
40.83  
39.37  
36.52  
35.64  
33.44  
32.82  
30.48  
30.35

| Parameter                | Value               |
|--------------------------|---------------------|
| 1 Title                  | CYB-17-126-500M     |
| 2 Origin                 | Bruker BioSpin GmbH |
| 3 Solvent                | CDCl3               |
| 4 Temperature            | 296.5               |
| 5 Number of Scans        | 57                  |
| 6 Acquisition Time       | 1.1010              |
| 7 Acquisition Date       | 2023-02-16T12:13:07 |
| 8 Spectrometer Frequency | 125.77              |
| 9 Spectral Width         | 29761.9             |

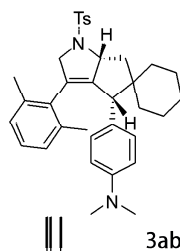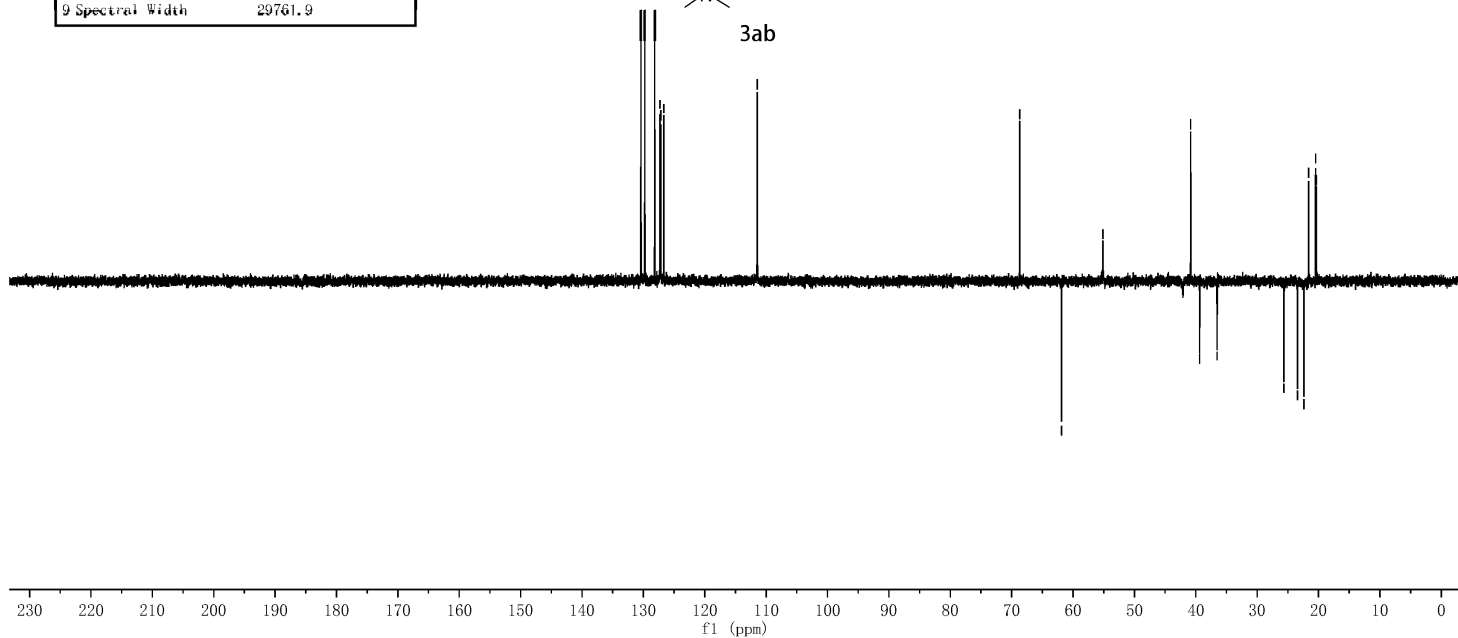

| Parameter                | Value (f2, f1)      |
|--------------------------|---------------------|
| 1 Title                  | CYB-17-128-NOE      |
| 2 Origin                 | Bruker BioSpin GmbH |
| 3 Solvent                | Acetone             |
| 4 Temperature            | 300.0               |
| 5 Number of Scans        | 64                  |
| 6 Acquisition Time       | 0.2560              |
| 7 Acquisition Date       | 2023-02-16T22:57:36 |
| 8 Spectrometer Frequency | (400.13, 400.13)    |
| 9 Spectral Width         | (4000.0, 4000.0)    |
| 10 Lowest Frequency      | (-158.1, -158.1)    |
| 11 Nucleus               | (1H, 1H)            |
| 12 Acquired Size         | (1024, 128)         |
| 13 Spectral Size         | (1024, 1024)        |

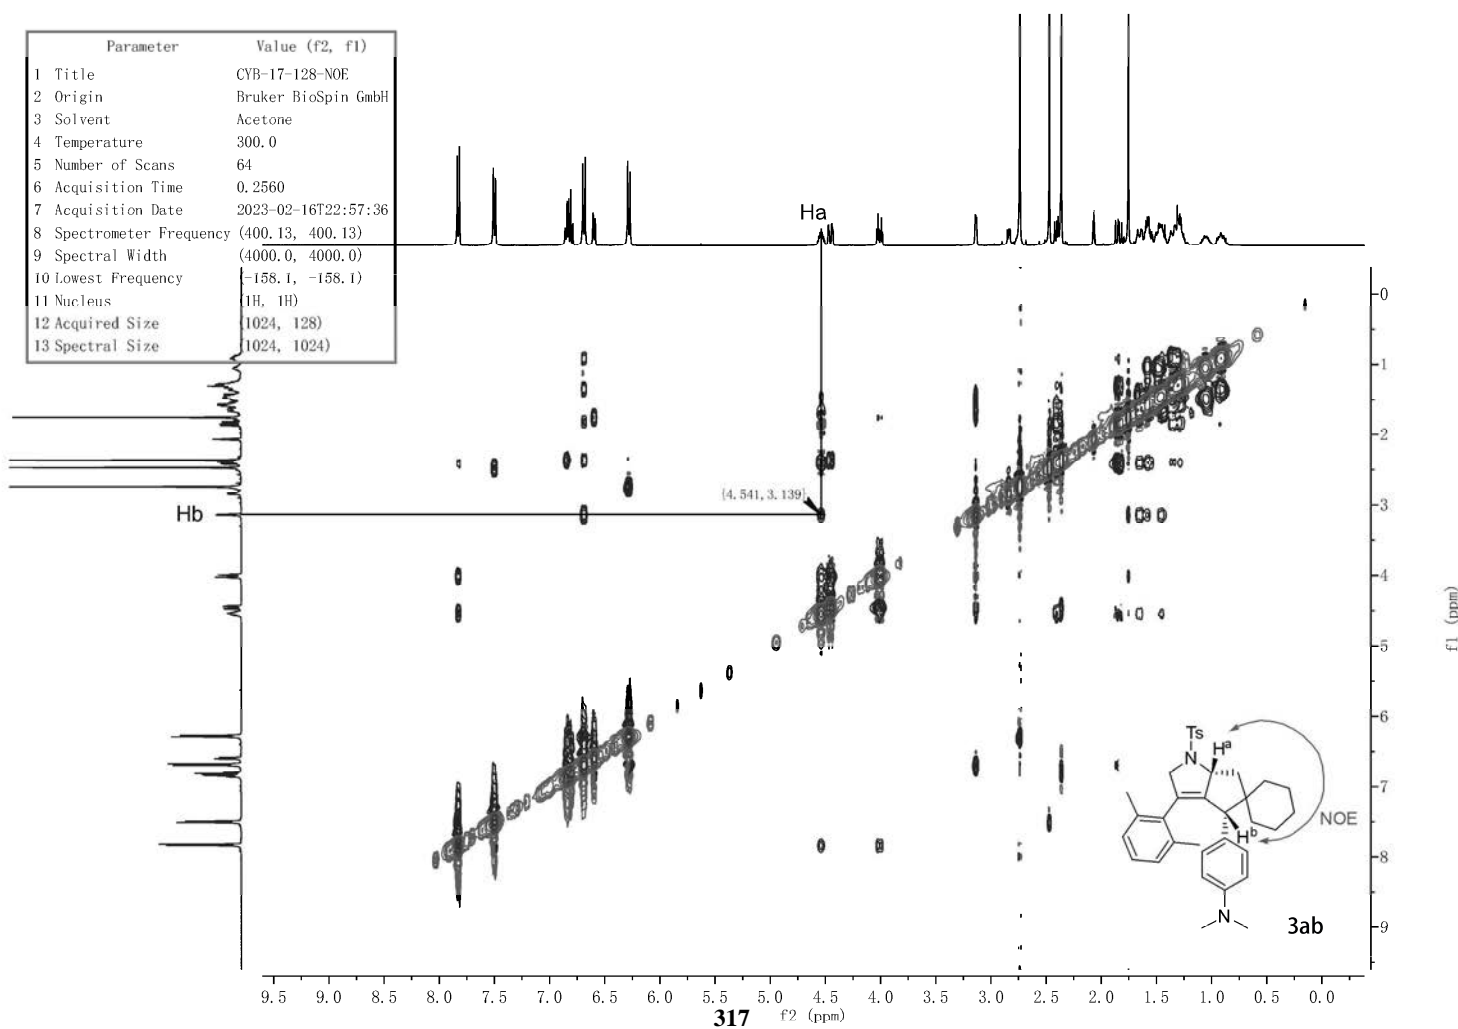

Supplementary Figure 217. DEPT-135 and NOESY NMR spectra for 3ab

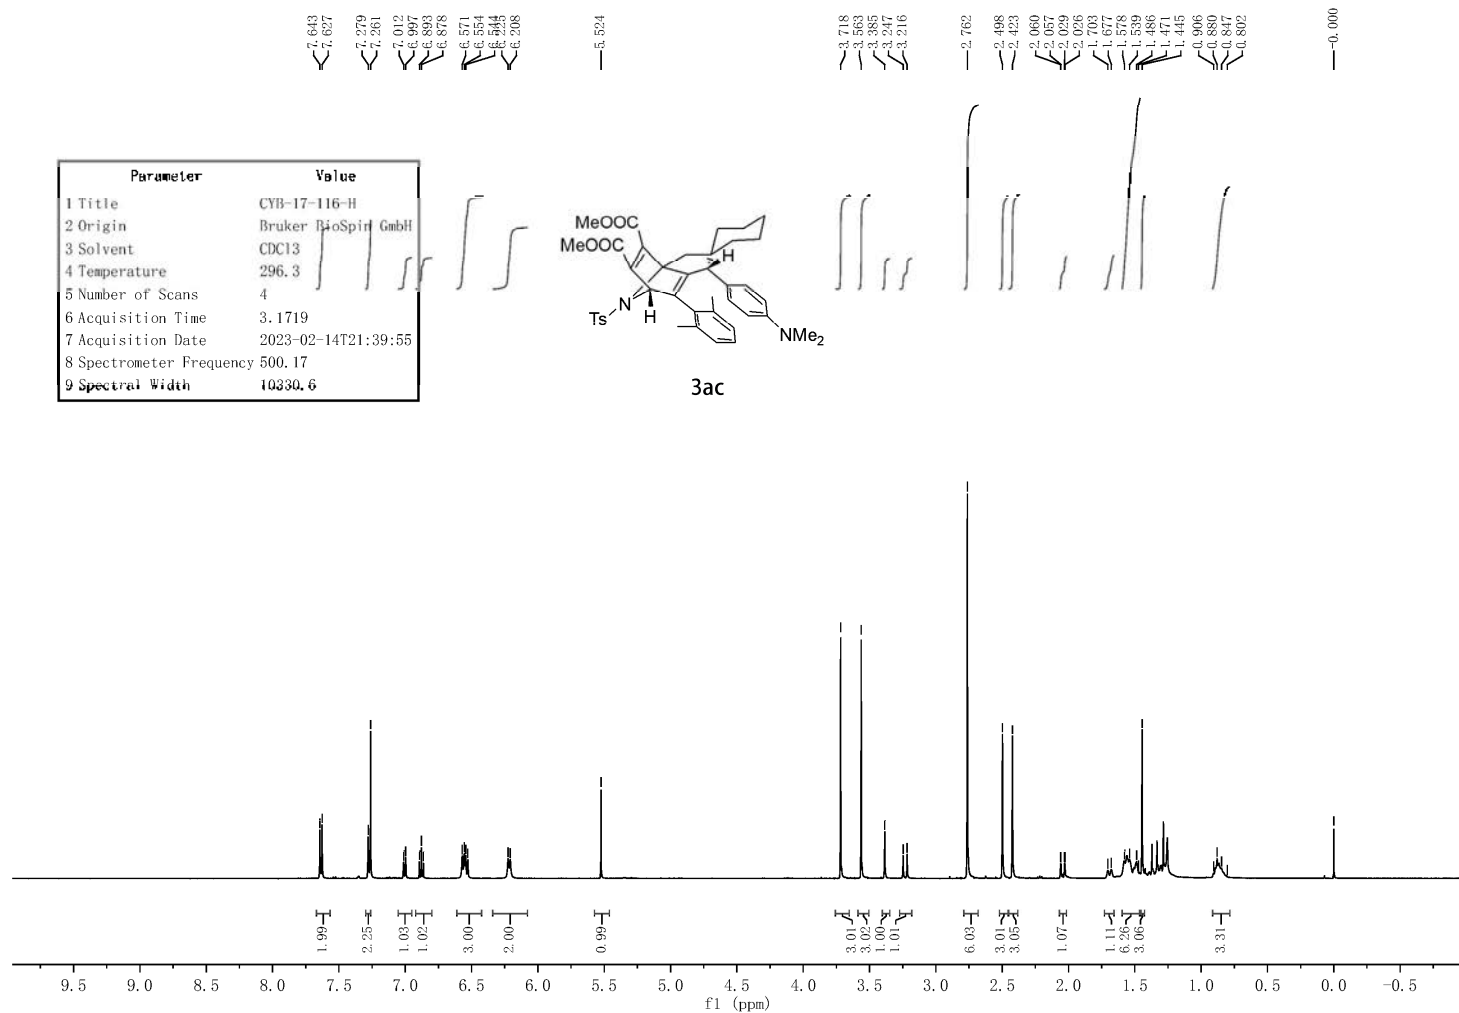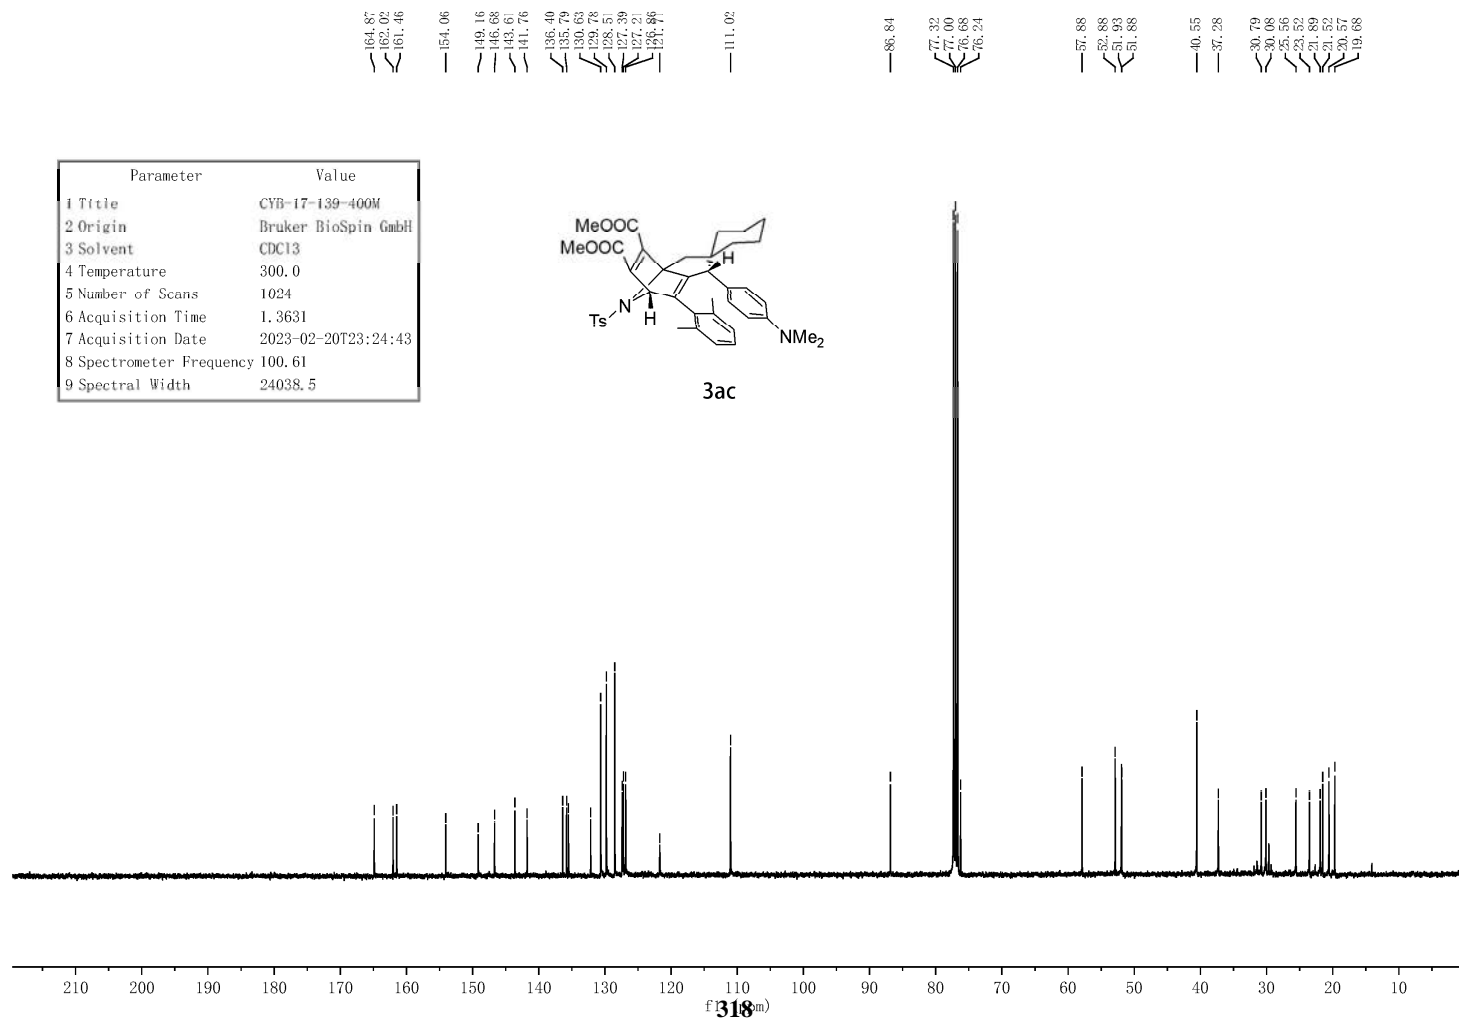

Supplementary Figure 218. <sup>1</sup>H and <sup>13</sup>C NMR spectra for 3ac

$\delta$  130.67, 129.82, 128.53, 127.43, 127.24, 126.89, 111.04, 76.24, 57.89, 51.99, 51.94, 40.59, 37.29, 30.78, 30.08, 25.57, 23.54, 21.90, 21.57, 20.61, 19.73

| Parameter                | Value               |
|--------------------------|---------------------|
| 1 Title                  | CYB-19-DA-1         |
| 2 Origin                 | Bruker BioSpin GmbH |
| 3 Solvent                | CDCl3               |
| 4 Temperature            | 297.9               |
| 5 Number of Scans        | 93                  |
| 6 Acquisition Time       | 1.1010              |
| 7 Acquisition Date       | 2023-06-27T09:41:18 |
| 8 Spectrometer Frequency | 125.77              |
| 9 Spectral Width         | 29761.9             |

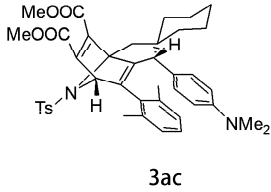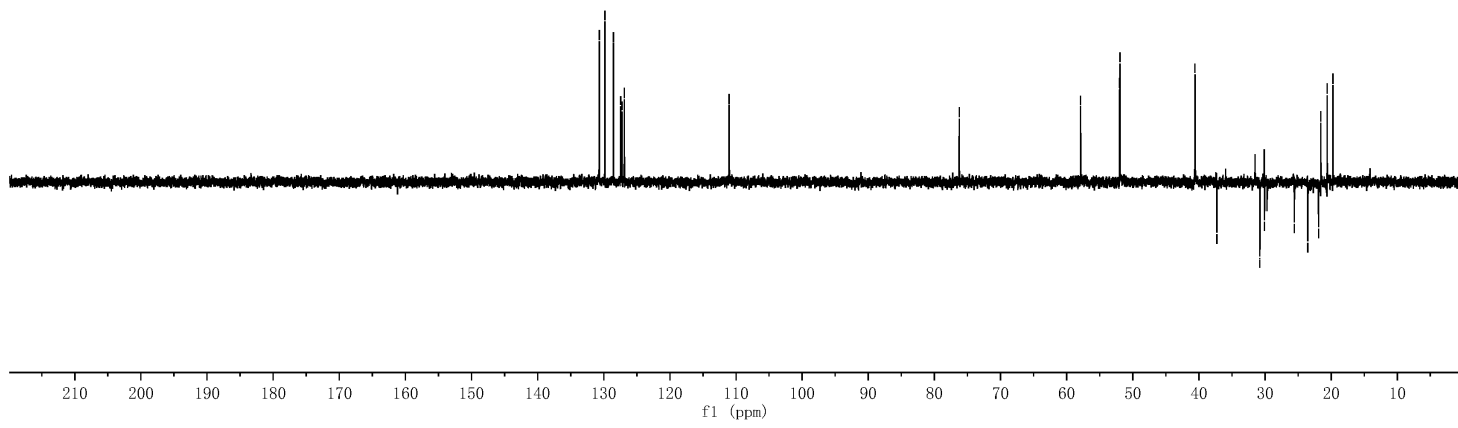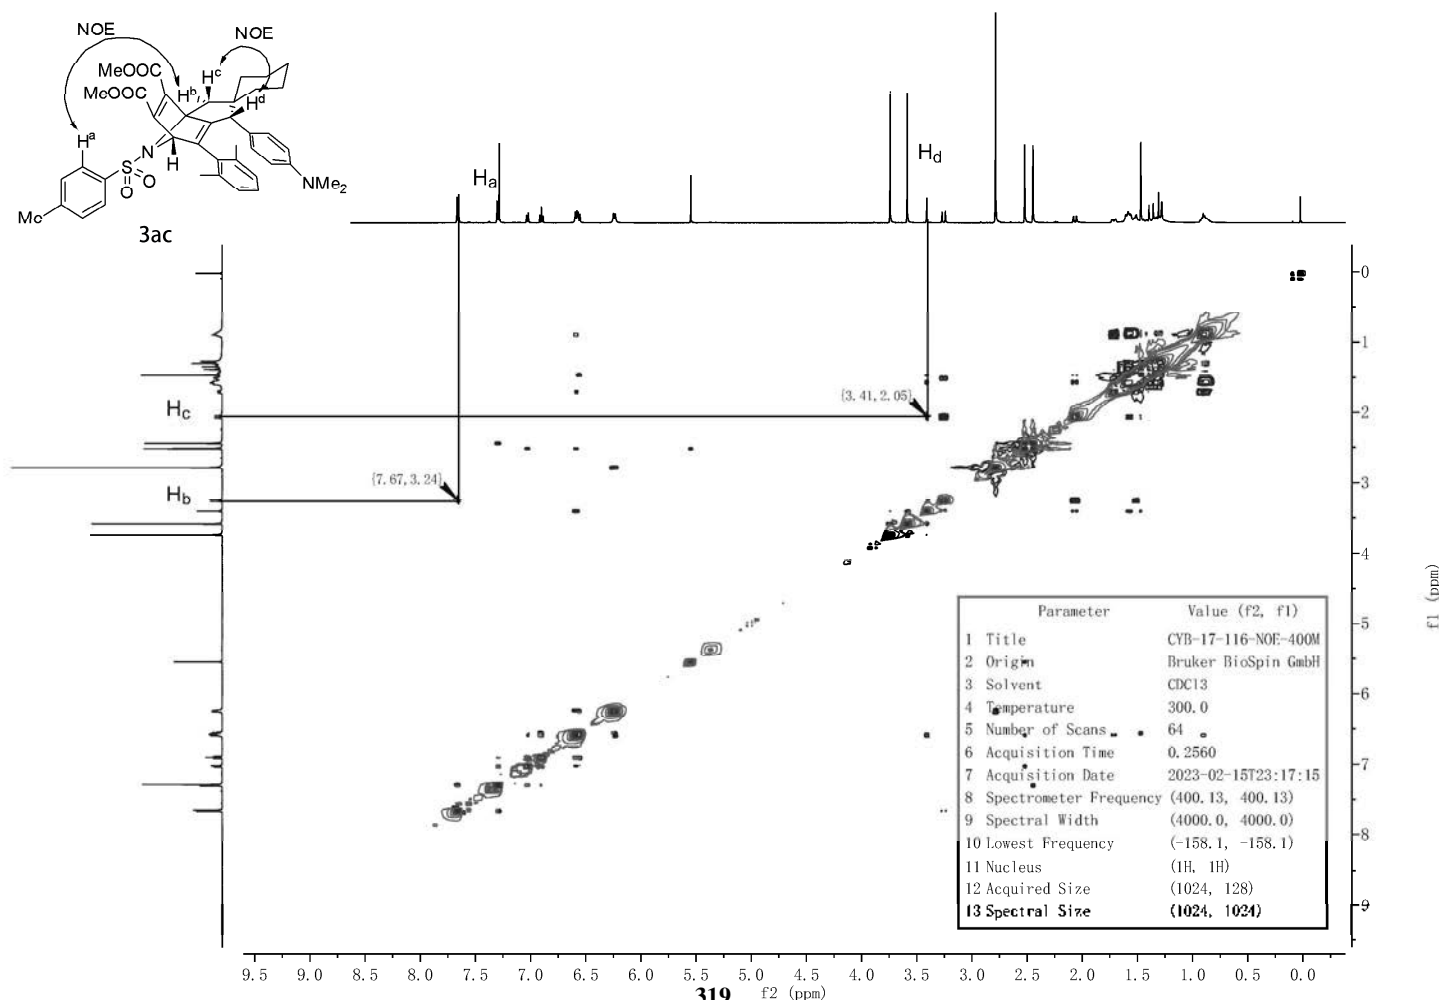

**Supplementary Figure 219. DEPT-135 and NOESY NMR spectra for 3ac**

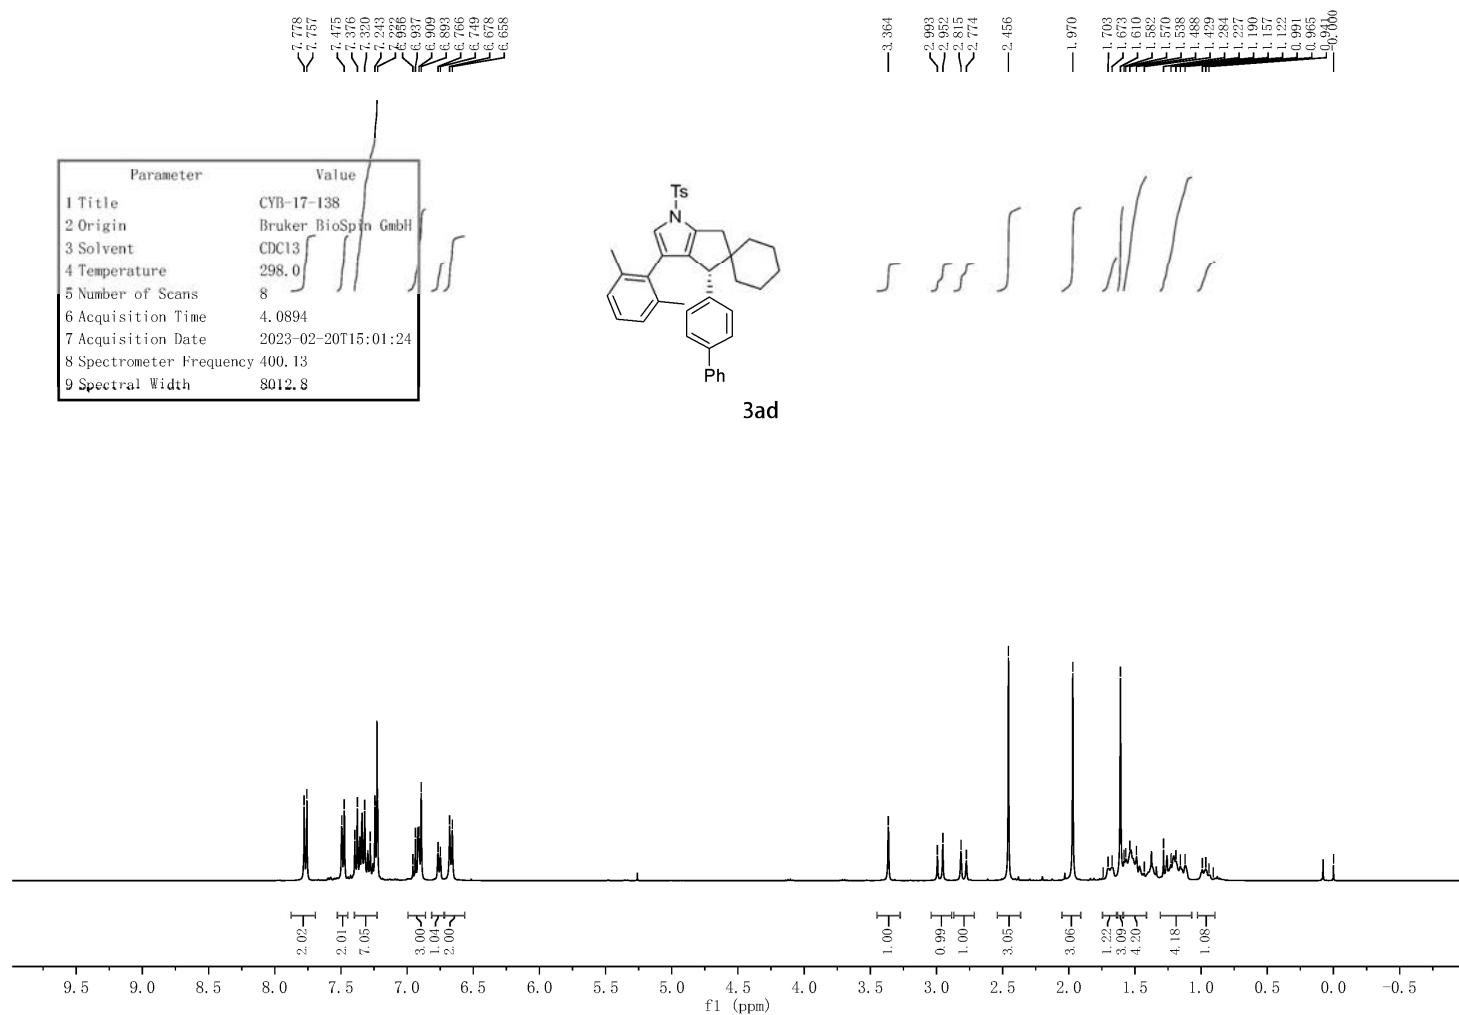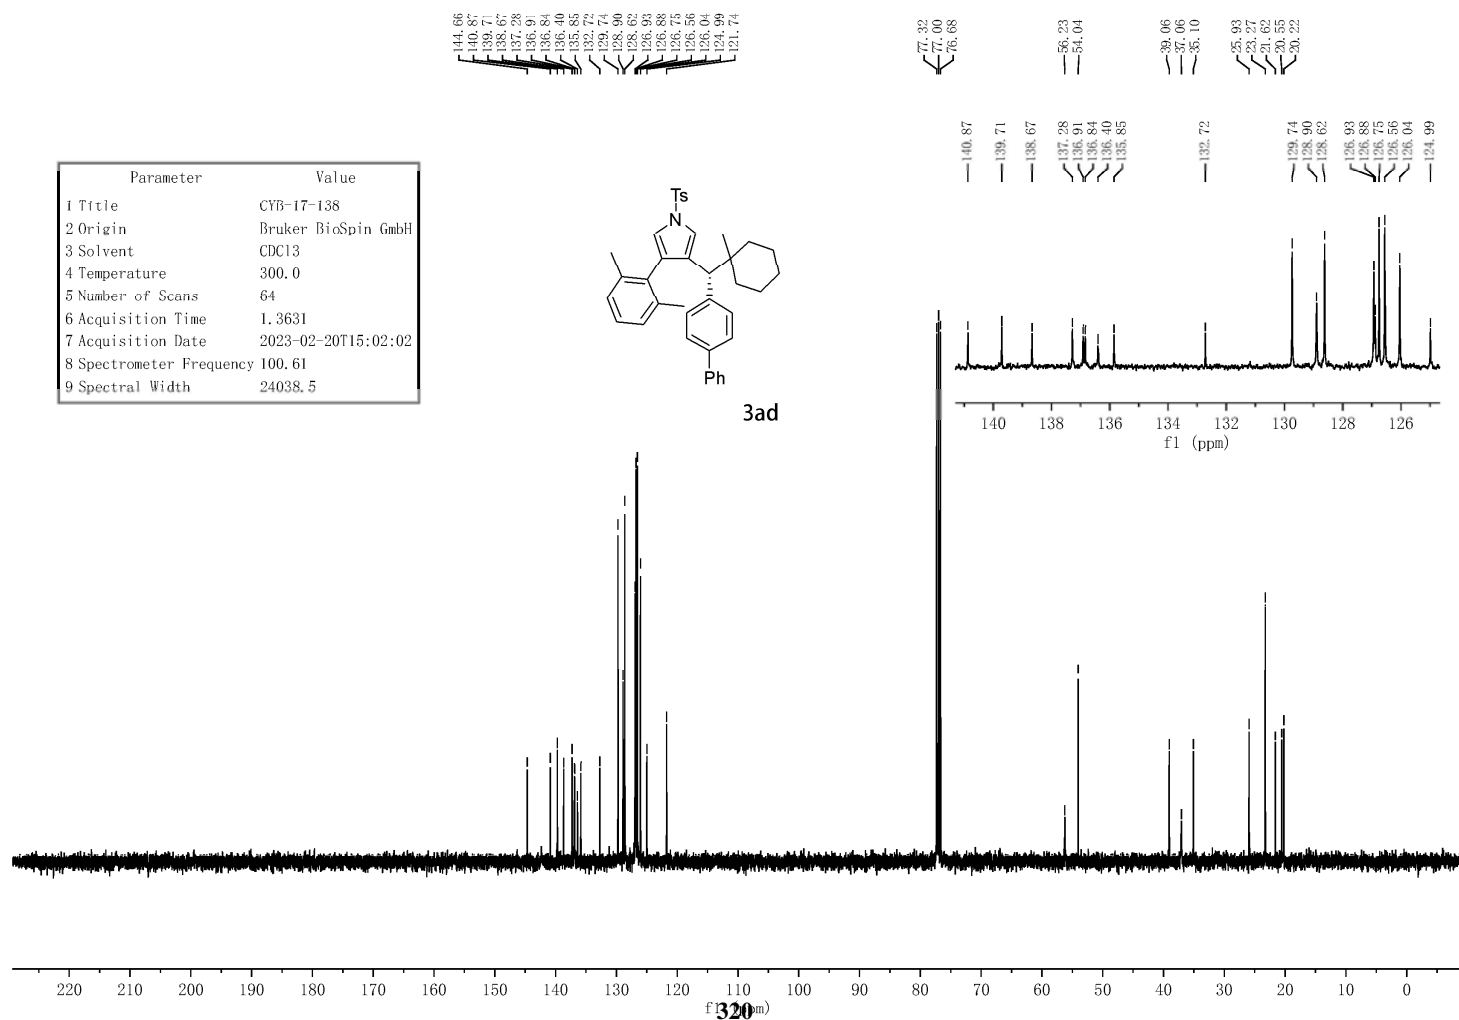

Supplementary Figure 220. <sup>1</sup>H and <sup>13</sup>C NMR spectra for 3ad



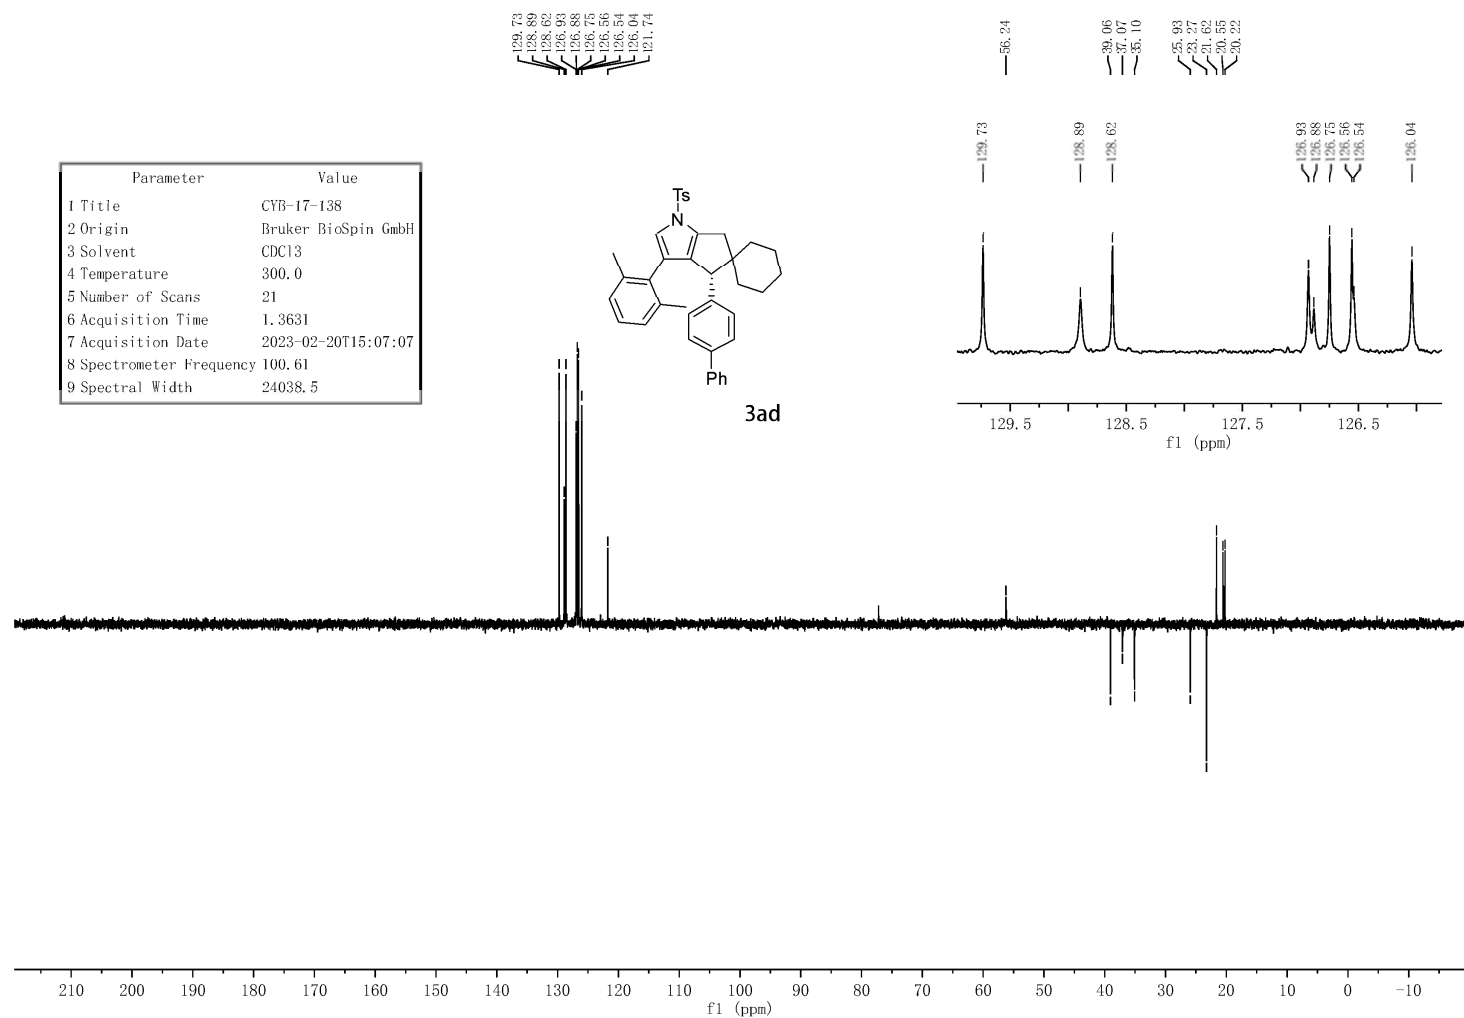

**Supplementary Figure 221. DEPT-135 NMR spectra for 3ad**

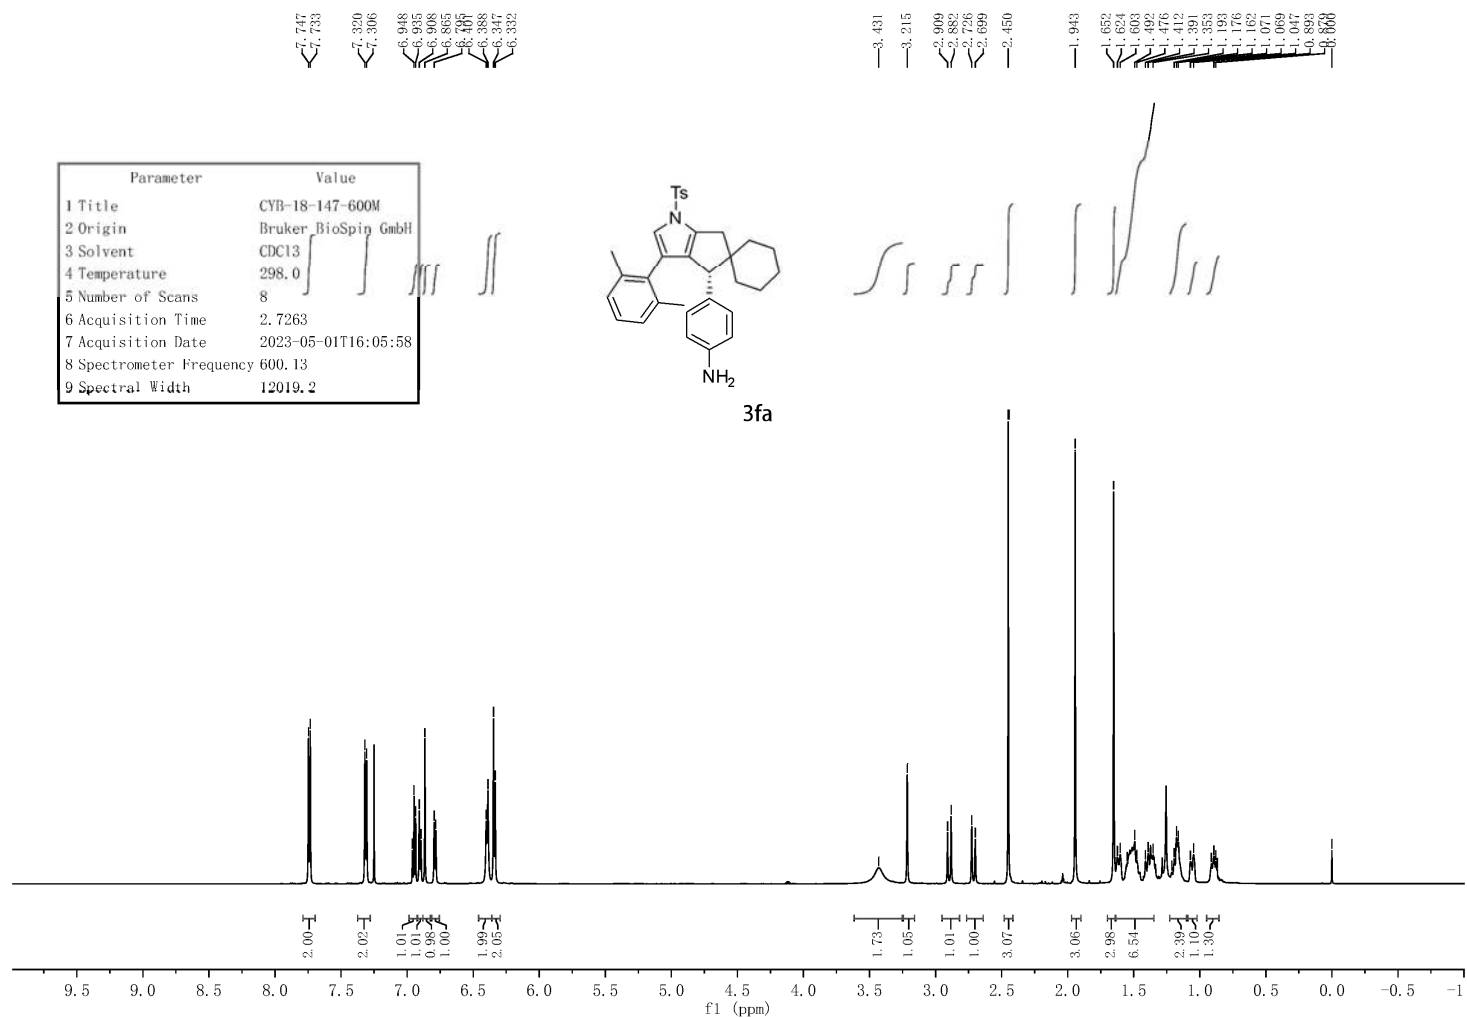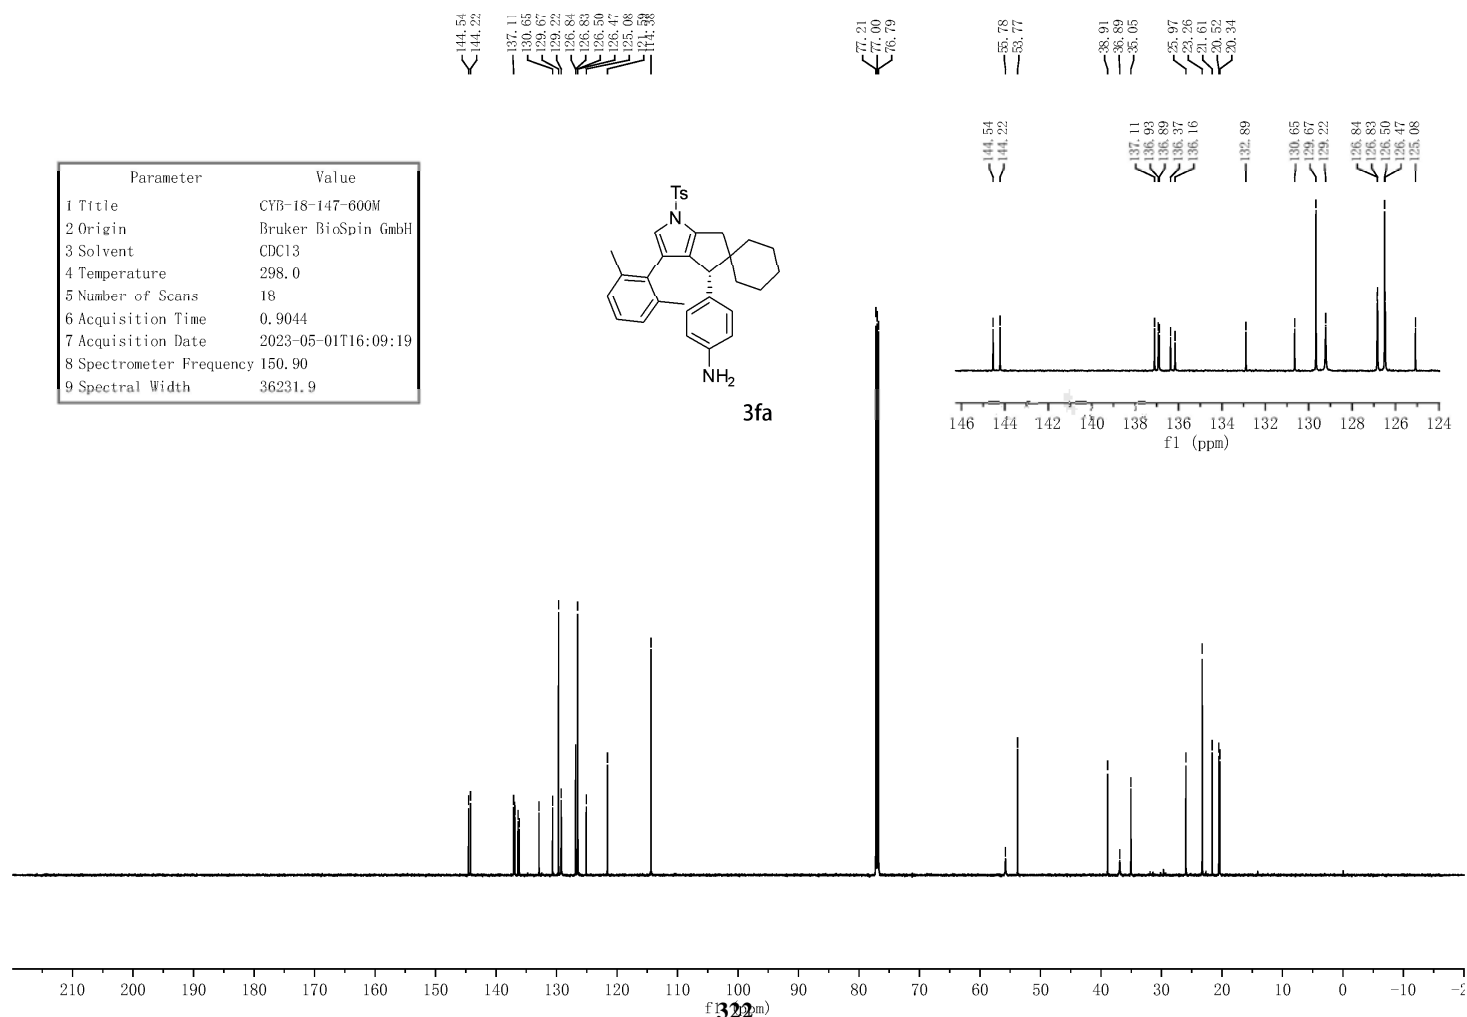

Supplementary Figure 22. <sup>1</sup>H and <sup>13</sup>C NMR spectra for 3fa

129.64  
129.21  
128.83  
128.49  
128.46  
121.59  
114.37

55.78  
38.92  
36.91  
35.83  
25.95  
23.25  
21.57  
20.48  
20.31

| Parameter                | Value               |
|--------------------------|---------------------|
| 1 Title                  | CYB-18-147 (400M)   |
| 2 Origin                 | Bruker BioSpin GmbH |
| 3 Solvent                | CDCl3               |
| 4 Temperature            | 300.0               |
| 5 Number of Scans        | 90                  |
| 6 Acquisition Time       | 1.3631              |
| 7 Acquisition Date       | 2023-05-02T21:21:02 |
| 8 Spectrometer Frequency | 100.61              |
| 9 Spectral Width         | 24038.5             |

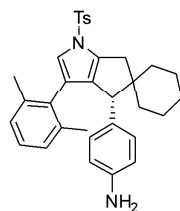

3fa

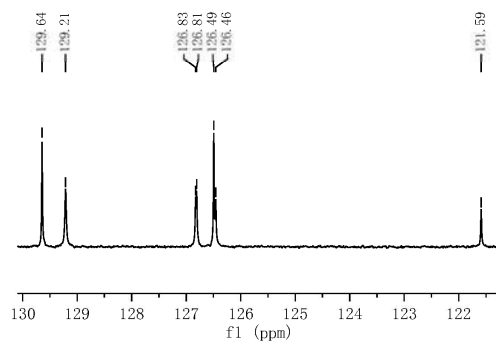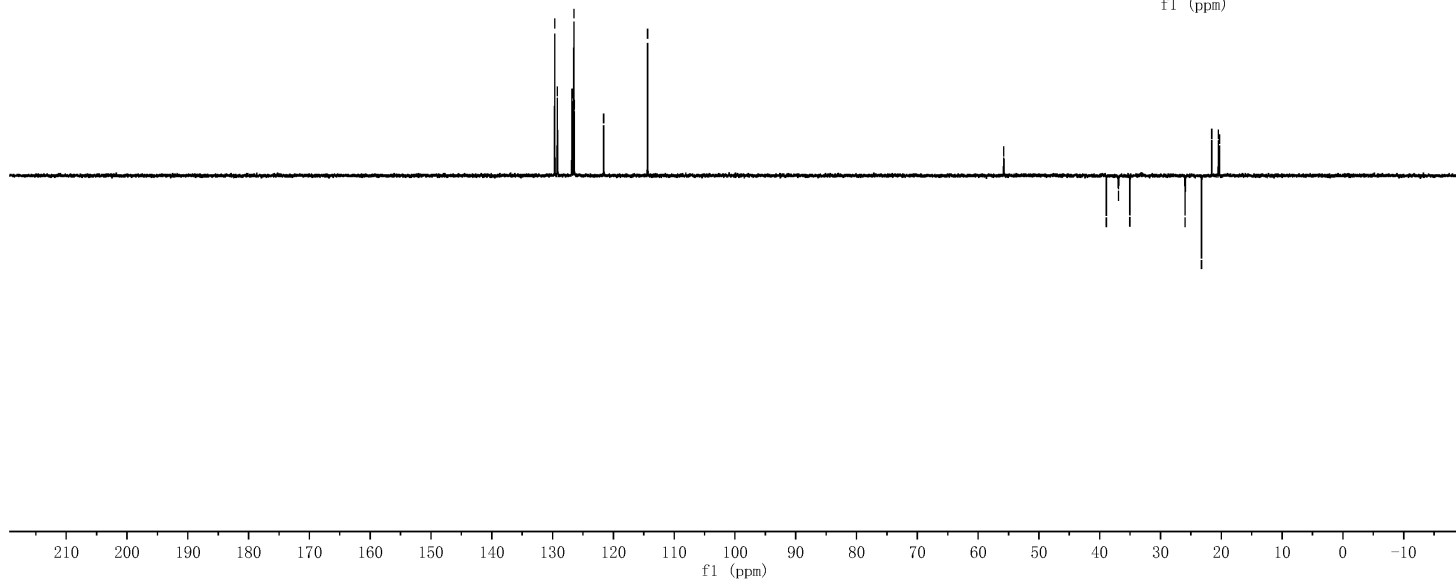

Supplementary Figure 223. DEPT-135 NMR spectra for 3fa

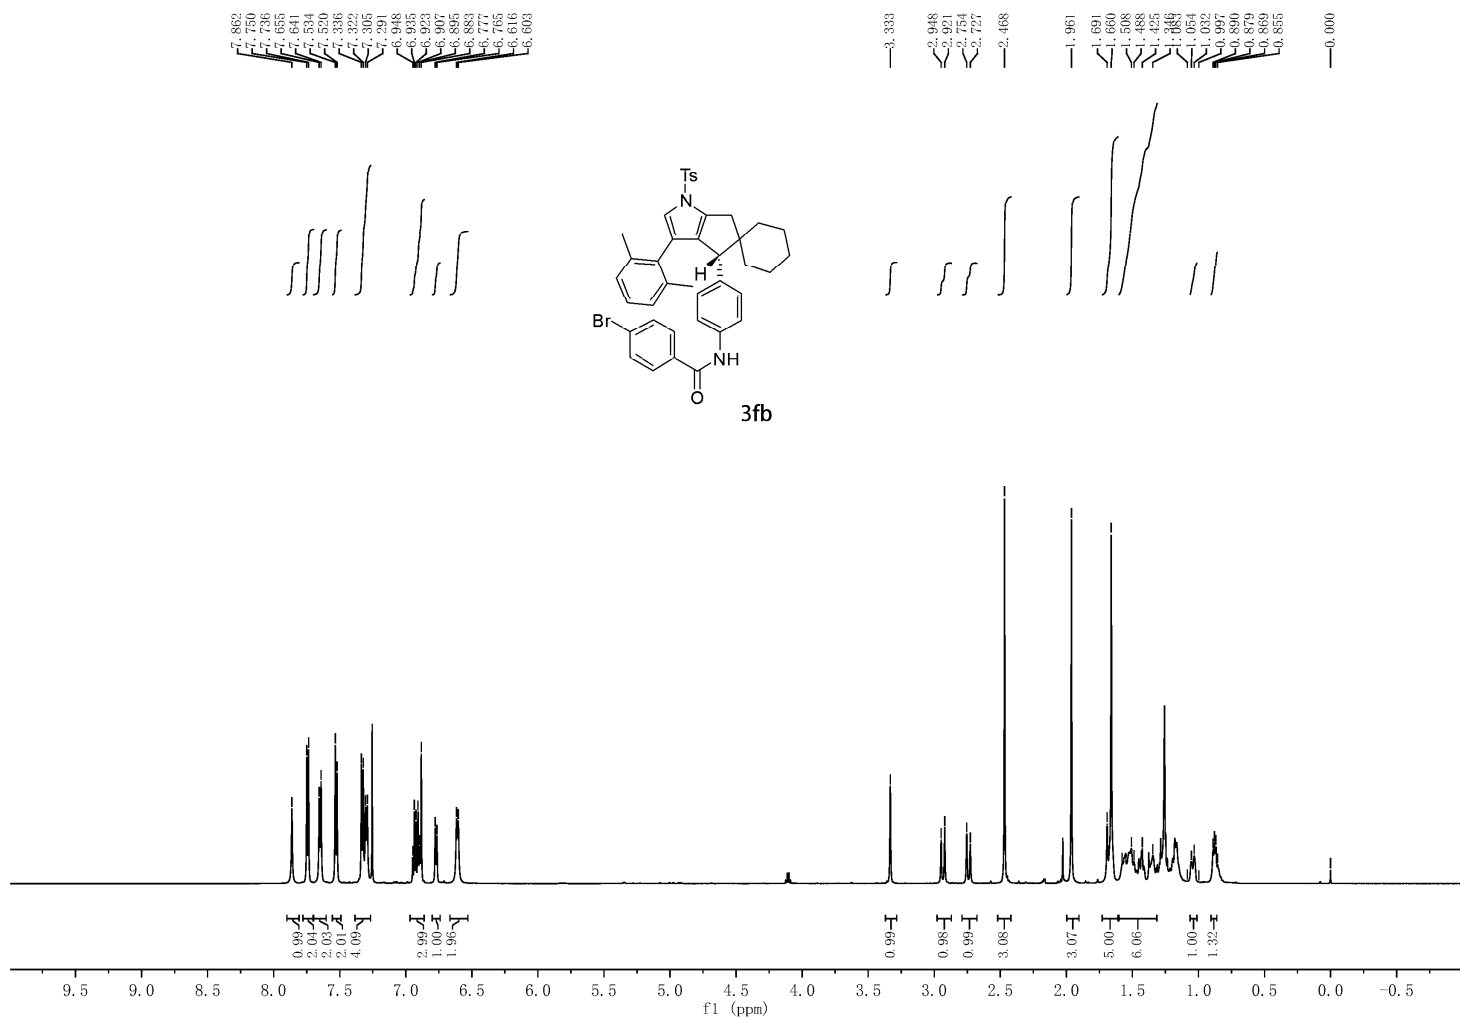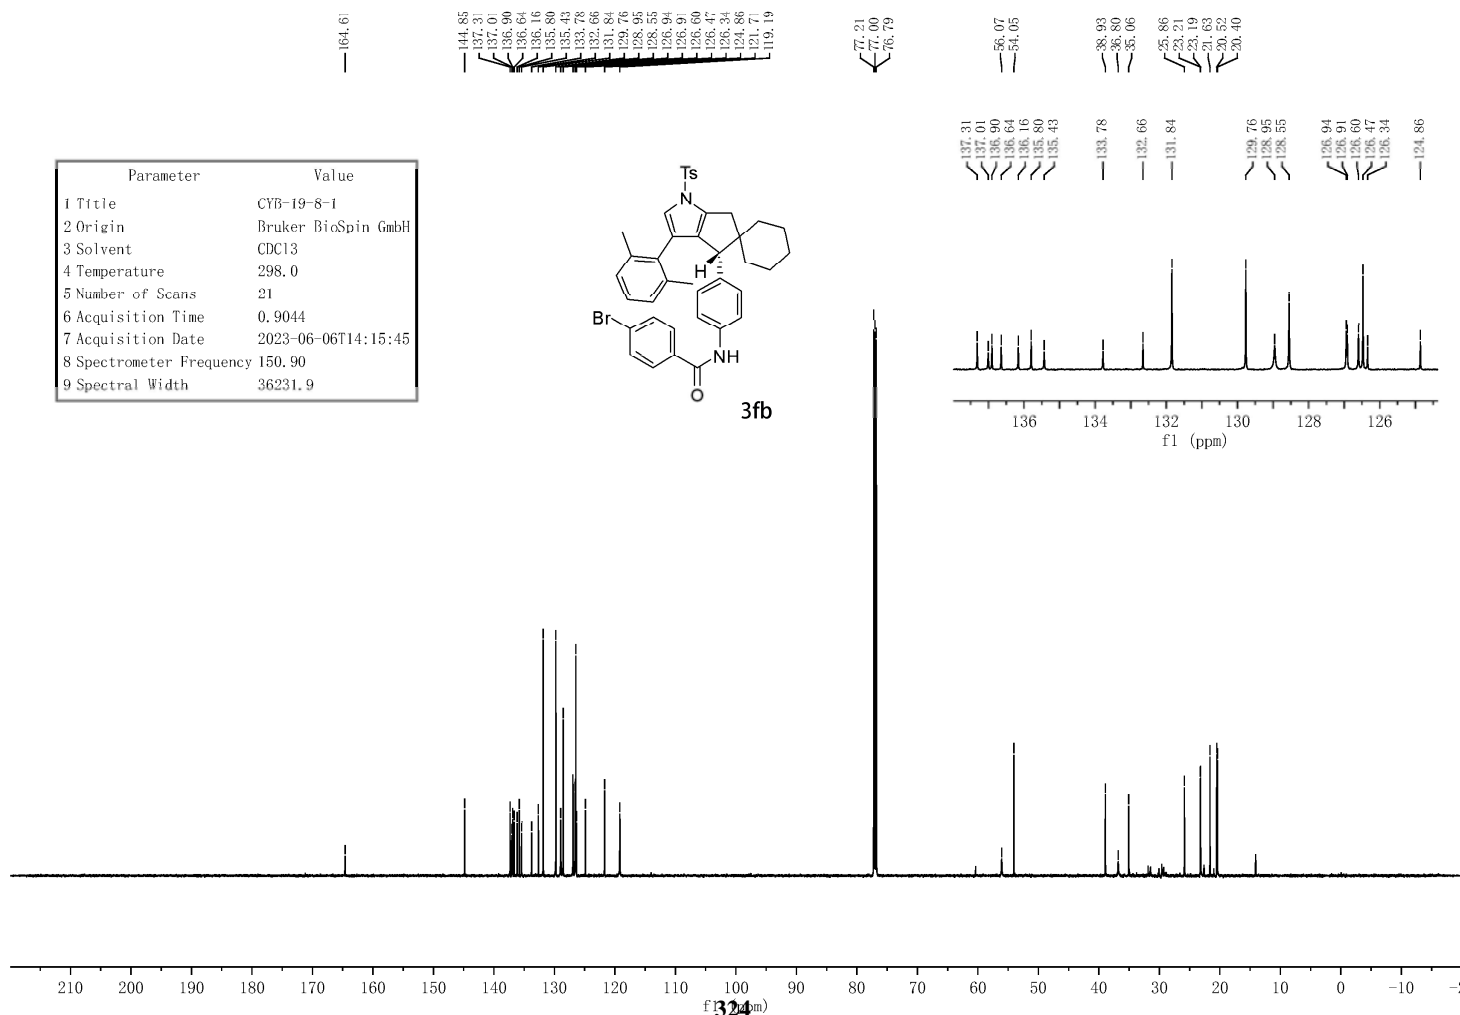

| Parameter                | Value               |
|--------------------------|---------------------|
| 1 Title                  | CYB-19-8-1          |
| 2 Origin                 | Bruker BioSpin GmbH |
| 3 Solvent                | CDC13               |
| 4 Temperature            | 298.0               |
| 5 Number of Scans        | 21                  |
| 6 Acquisition Time       | 0.9044              |
| 7 Acquisition Date       | 2023-06-06T14:15:45 |
| 8 Spectrometer Frequency | 150.90              |
| 9 Spectral Width         | 36231.9             |

Supplementary Figure 224. <sup>1</sup>H and <sup>13</sup>C NMR spectra for 3fb

131.04  
129.87  
129.05  
128.65  
127.04  
127.01  
126.70  
126.57  
121.80  
119.28

56.16

38.80  
36.49  
35.16  
25.96  
23.31  
23.29  
21.74  
20.63  
20.50

| Parameter                | Value               |
|--------------------------|---------------------|
| 1 Title                  | CYB-19-8            |
| 2 Origin                 | Bruker BioSpin GmbH |
| 3 Solvent                | CDCl3               |
| 4 Temperature            | 295.3               |
| 5 Number of Scans        | 57                  |
| 6 Acquisition Time       | 1.3631              |
| 7 Acquisition Date       | 2023-06-06T21:40:32 |
| 8 Spectrometer Frequency | 100.56              |
| 9 Spectral Width         | 24038.5             |

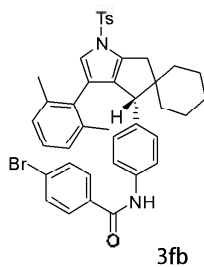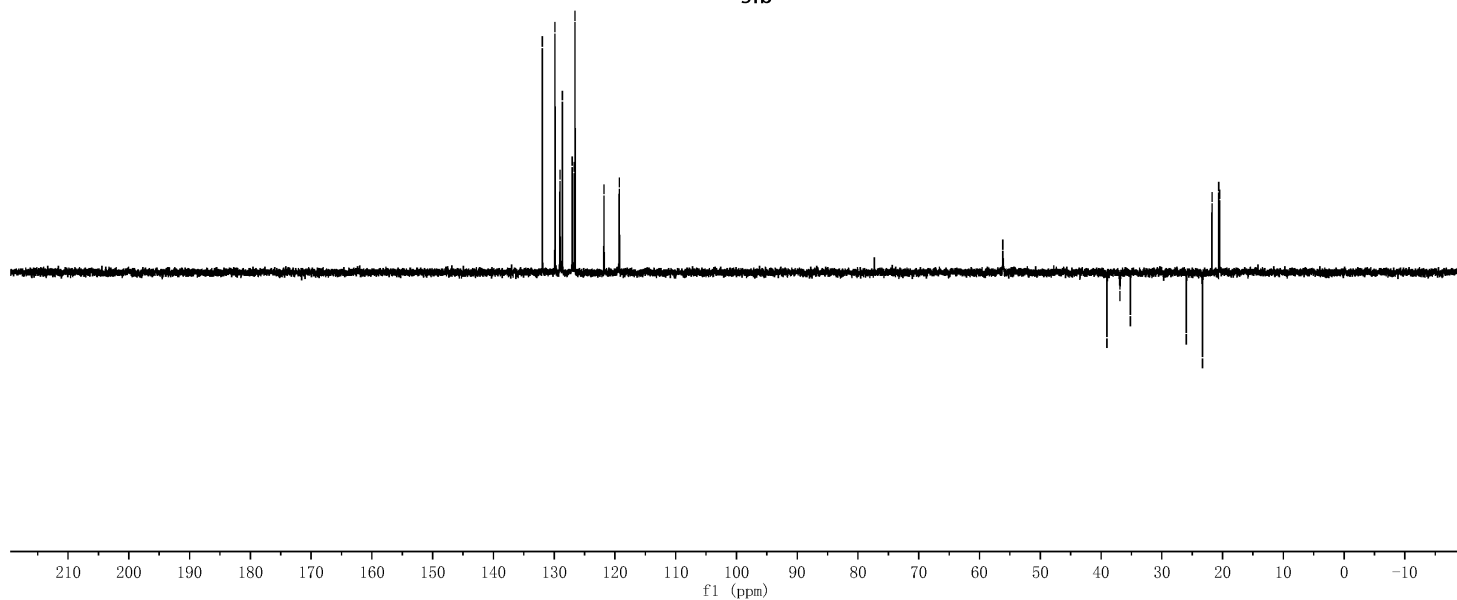

Supplementary Figure 225. DEPT-135 NMR spectra for 3fb

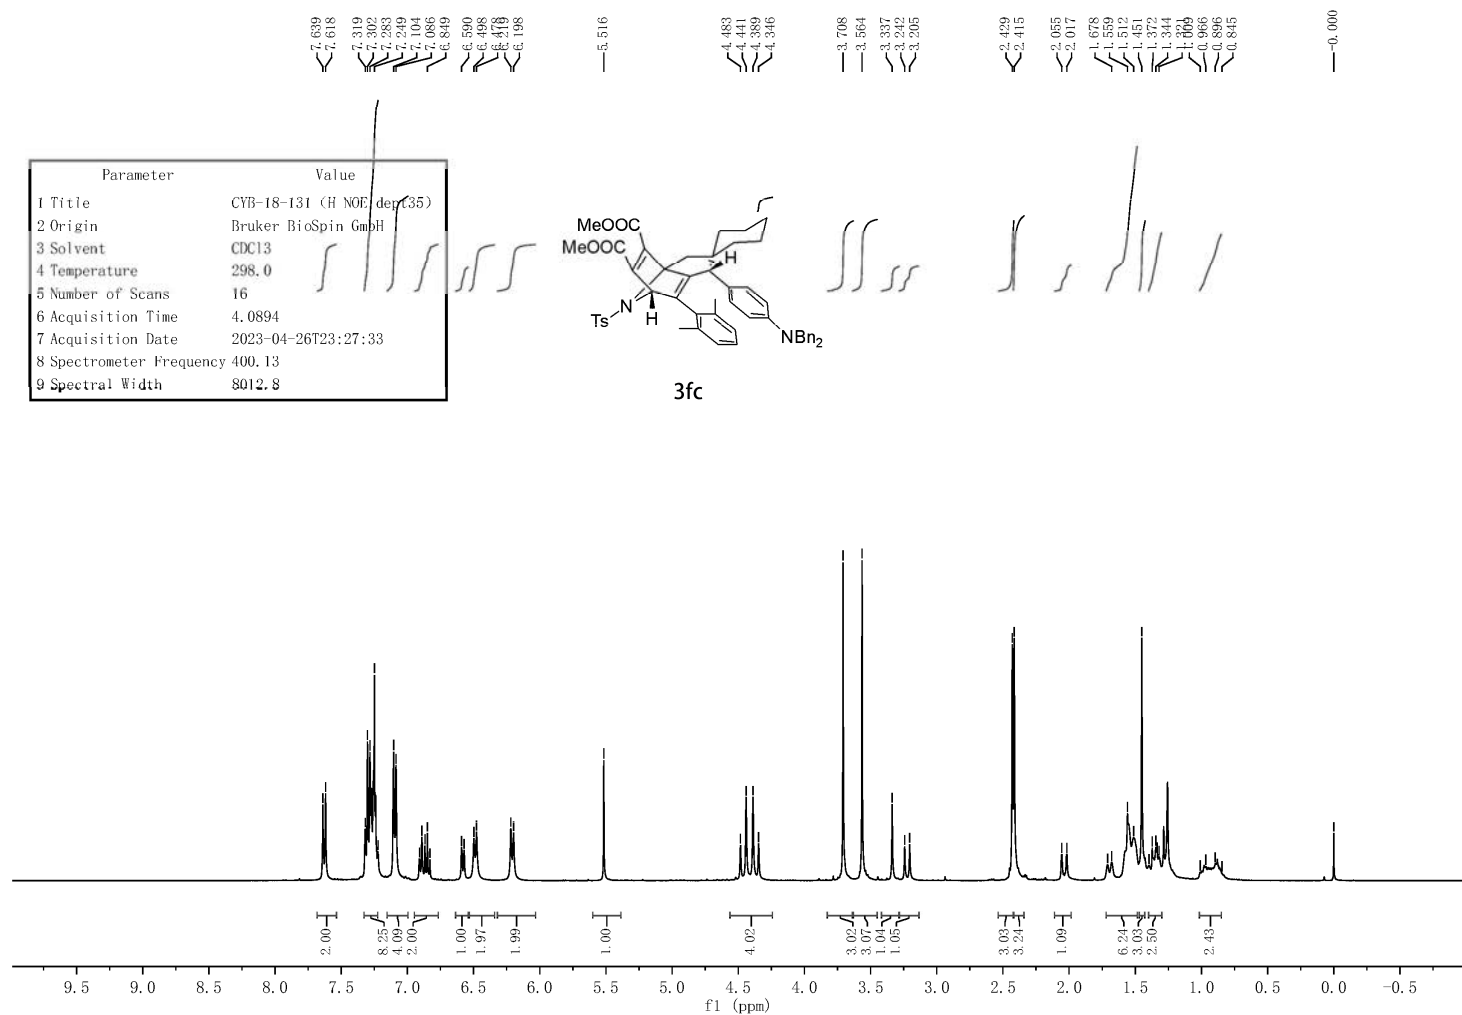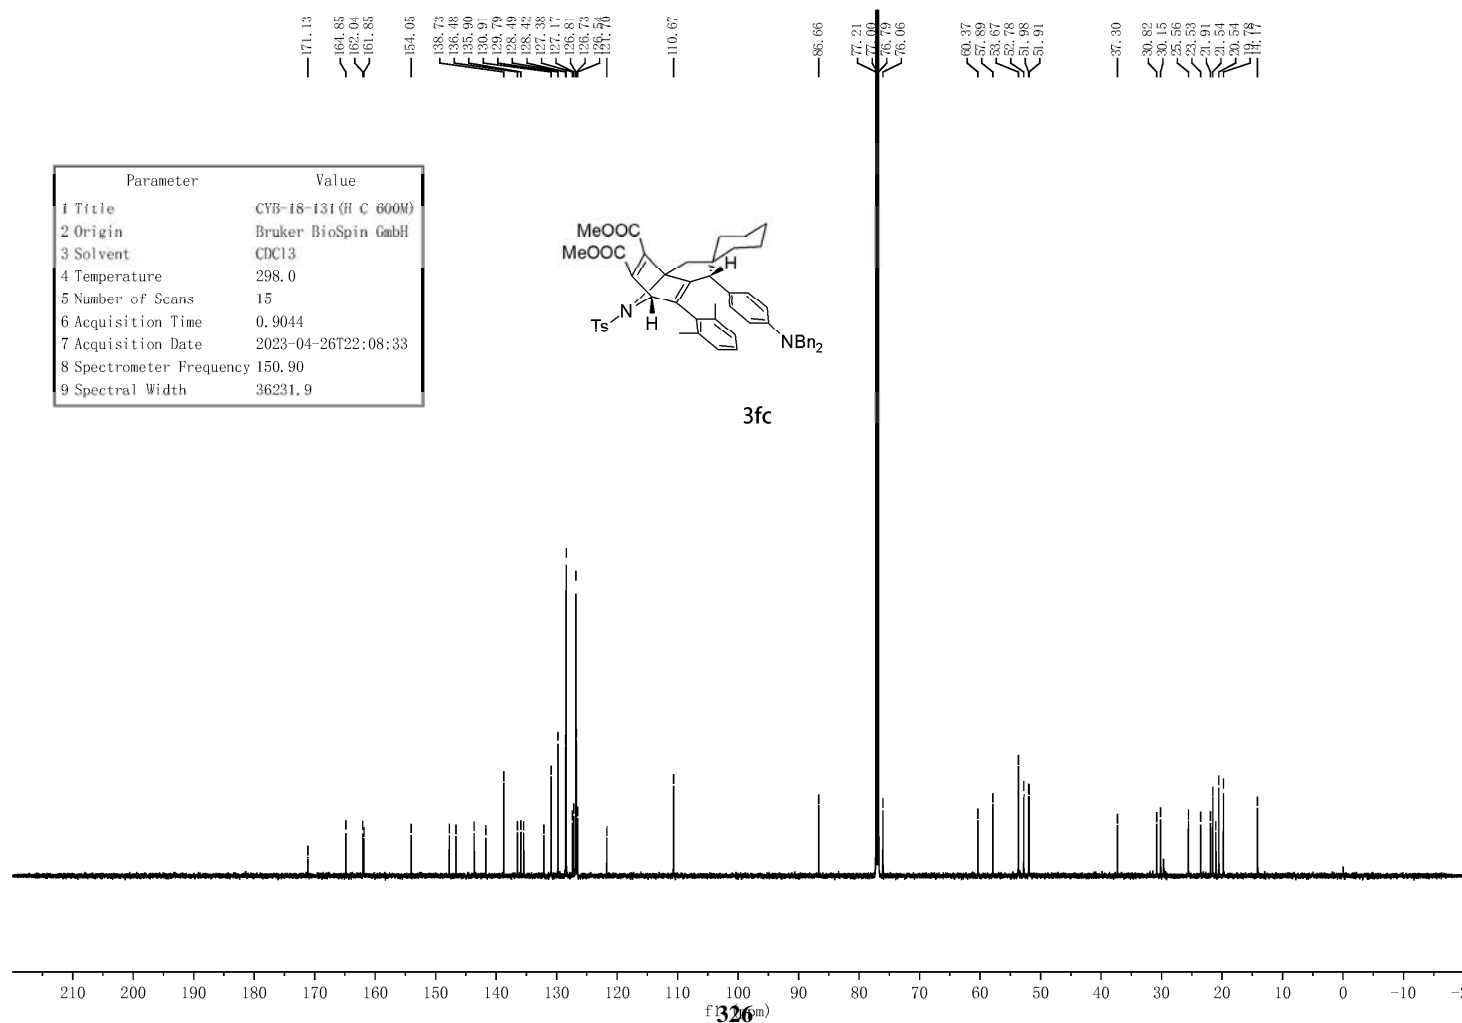

Supplementary Figure 226. <sup>1</sup>H and <sup>13</sup>C NMR spectra for **3fc**

130.95  
129.81  
128.33  
128.25  
127.45  
127.26  
126.86  
126.77  
126.59  
— 110.77  
— 76.13  
57.96  
53.75  
51.99  
51.93  
— 37.37  
30.90  
30.22  
23.86  
21.57  
20.58  
19.80

| Parameter                | Value                     |
|--------------------------|---------------------------|
| 1 Title                  | CYB-18-131 (H NOE dept35) |
| 2 Origin                 | Bruker BioSpin GmbH       |
| 3 Solvent                | CDCl3                     |
| 4 Temperature            | 300.0                     |
| 5 Number of Scans        | 256                       |
| 6 Acquisition Time       | 1.3631                    |
| 7 Acquisition Date       | 2023-04-27T05:21:41       |
| 8 Spectrometer Frequency | 100.62                    |
| 9 Spectral Width         | 24038.5                   |

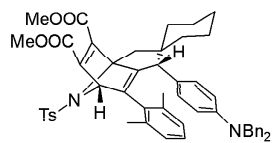

3fc

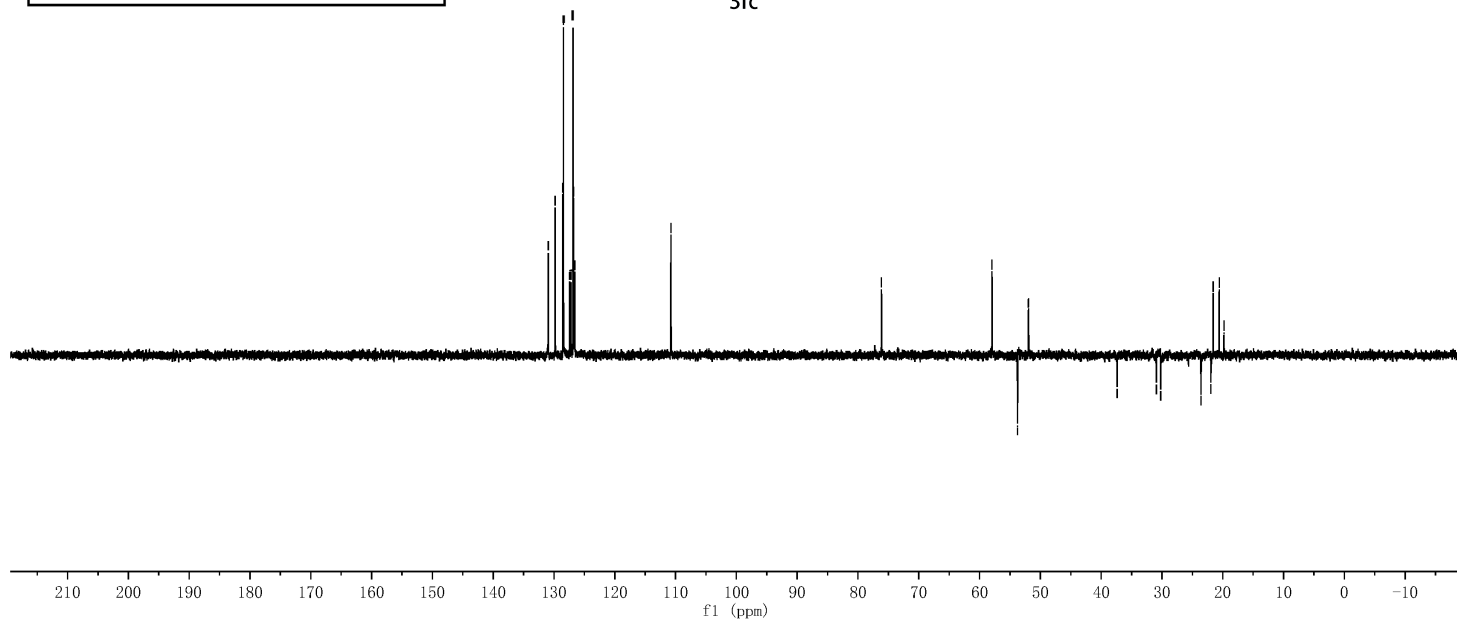

Supplementary Figure 227. DEPT-135 NMR spectra for 3fc

## 10. References

1. Meden, A. et al. Tryptophan-derived butyrylcholinesterase inhibitors as promising leads against Alzheimer's disease. *Chem. Commun.* **55**, 3765–3768 (2019).
2. Hong, F.-L. et al. Generation of donor/donor copper carbenes through copper-catalyzed diyne cyclization: enantioselective and divergent synthesis of chiral polycyclic pyrroles. *J. Am. Chem. Soc.* **141**, 16961–16970 (2019).
3. Zhu, X.-Q. et al. Copper-catalyzed asymmetric cyclization of alkenyl diynes: method development and new mechanistic insights. *Chem. Sci.* **12**, 9466–9474 (2021).
4. Su, X., Sun, Y., Yao, J., Chen, H. & Chen, C. Acid-promoted bicyclization of arylacetylenes to benzobicyclo[3.2.1]octanes through cationic rearrangements. *Chem. Commun.* **52**, 4537–4540 (2016).
5. Pascalis, L. D., Tekkam, S. & Finn, M.G. Azanorbornadienes as thiol-reactive cleavable linkers. *Org. Lett.* **22**, 6248–6251 (2020).
6. Frisch, M. J. et al. *Gaussian 16, Revision B.01, Gaussian, Inc., Wallingford CT, 2016.*
7. Becke, A. D. Density - functional thermochemistry. III. The role of exact exchange. *J. Chem. Phys.* **98**, 5648–5652 (1993).
8. Lee, C., Yang, W. & Parr, R. G. Development of the Colle–Salvetti correlation-energy formula into a functional of the electron density. *Phys. Rev. B* **37**, 785–789 (1998).
9. Wadt, W. R. & Hay, P. J. Ab initio effective core potentials for molecular calculations. Potentials for main group elements Na to Bi. *J. Chem. Phys.* **82**, 284–298 (1985).
10. Hay, P. J. & Wadt, W. R. Ab initio effective core potentials for molecular calculations. Potentials for the transition metal atoms Sc to Hg. *J. Chem. Phys.* **82**, 270–283 (1985).
11. Woon, D. E. & Dunning, T. H. Jr. Gaussian basis sets for use in correlated molecular calculations. V. Core-valence basis sets for boron through neon. *J. Chem. Phys.* **103**, 4572–4585 (1995).



12. Adamo, C. & Barone, V. Toward reliable density functional methods without adjustable parameters: the PBE0 model. *J. Chem. Phys.* **110**, 6158–6169 (1999).
13. Weigend, F. Accurate Coulomb-fitting basis sets for H to Rn. *Phys. Chem. Chem. Phys.* **8**, 1057–1065 (2006).
14. Marenich, A. V., Cramer, C. J. & Truhlar, D. G. Universal solvation model based on solute electron density and on a continuum model of the solvent defined by the bulk dielectric constant and atomic surface tensions. *J. Phys. Chem. B* **113**, 6378–6396 (2009).
15. W. Humphrey, A. Dalke, K. Schulten, VMD: Visual Molecular Dynamics. *J. Mol. Graph. Model.* **14**, 33–38 (1996).
